# Supplementary material for: Human forebrain assembloids modeling a neurodevelopmental disorder reveals neural circuit deficits via DNA damage
Source: Research Square preprint supplement (doi:10.21203/rs.3.rs-7957934/v1), 2025-11-14
Supplement: Supplementary file 1 [file 0e2557f417445f935a8105a8.xlsx]

## Sheet: WT_MGE_Mig-VS-Stat
	p_val	avg_log2FC	pct.1	pct.2	p_val_adj
MEIS2	9.43109e-142	3.22185	0.265	0.039	1.70457e-137
CRABP1	1.98872e-87	-1.30812	0.158	0.464	3.5944e-83
SST	6.11245e-84	-2.00687	0.076	0.323	1.10476e-79
LHX8	5.45734e-68	-1.04152	0.237	0.508	9.86359e-64
NKX2-1	7.5808e-60	-1.70886	0.085	0.319	1.37015e-55
PEG10	9.3702e-52	-0.576857	0.61	0.809	1.69357e-47
LHX6	1.16504e-44	-1.30163	0.074	0.226	2.10569e-40
AFF2	1.68641e-41	-0.789273	0.194	0.393	3.04801e-37
GAD1	6.43511e-40	-0.789651	0.203	0.38	1.16308e-35
DLK1	1.85855e-37	1.21033	0.246	0.163	3.35914e-33
SP8	1.03206e-34	3.33958	0.054	0.006	1.86535e-30
SLC2A1	7.65355e-33	1.14262	0.165	0.12	1.3833e-28
VIM	2.59986e-30	0.673376	0.49	0.433	4.69899e-26
LSAMP	3.06422e-30	-0.612619	0.161	0.323	5.53828e-26
NNAT	1.59696e-29	-0.215893	0.788	0.903	2.88635e-25
MT-CO2	3.83728e-29	-0.24995	0.751	0.882	6.93551e-25
BOC	1.71476e-28	3.12054	0.049	0.006	3.09925e-24
ENC1	3.65939e-27	-0.496147	0.374	0.537	6.61399e-23
SLC8A1	9.2862e-27	1.17847	0.168	0.098	1.67839e-22
MEST	5.10878e-26	-0.334373	0.552	0.711	9.2336e-22
NREP	5.30013e-26	-0.229321	0.514	0.677	9.57946e-22
VCAN	6.72453e-26	0.701976	0.195	0.183	1.21539e-21
SFTA3	1.01202e-24	-1.94516	0.016	0.104	1.82913e-20
CPE	1.14722e-24	-0.342882	0.404	0.576	2.07348e-20
NCAM1	1.34621e-24	-0.469981	0.347	0.519	2.43313e-20
GRIA1	1.45135e-24	-0.664497	0.124	0.244	2.62318e-20
FTL	2.9755e-24	0.494344	0.416	0.403	5.37791e-20
RBFOX2	3.30526e-24	-0.380439	0.293	0.45	5.97392e-20
SESN3	4.61673e-24	-0.891139	0.093	0.212	8.34428e-20
SFRP1	6.56647e-24	1.96326	0.094	0.032	1.18682e-19
ELAVL2	8.40317e-24	-0.668487	0.16	0.3	1.51879e-19
ATF5	1.06108e-23	0.96628	0.177	0.128	1.9178e-19
DCLK2	1.58444e-23	-0.351921	0.289	0.442	2.86372e-19
GNRH1	6.82554e-23	2.70761	0.057	0.015	1.23365e-18
TUB	7.15072e-23	-0.754109	0.098	0.217	1.29242e-18
NECTIN1	1.29539e-22	-0.398719	0.141	0.246	2.34129e-18
MT-CYB	1.34218e-22	-0.179285	0.653	0.791	2.42587e-18
GRIK3	1.49677e-22	-0.650755	0.15	0.292	2.70526e-18
ISLR2	3.28588e-22	1.01911	0.264	0.173	5.9389e-18
MAP1LC3B	3.81034e-21	0.586102	0.229	0.213	6.88681e-17
SPARCL1	5.43109e-21	-2.79345	0.008	0.08	9.81616e-17
MAP1B	2.31655e-20	0.218891	0.668	0.71	4.18693e-16
ADM	2.52859e-20	2.19723	0.04	0.017	4.57017e-16
EFNB3	5.01021e-20	-0.361543	0.16	0.274	9.05546e-16
ETFB	5.22992e-20	0.763771	0.242	0.196	9.45256e-16
NSG2	6.98563e-20	-0.582237	0.283	0.457	1.26258e-15
CELF3	8.38335e-20	-0.313498	0.4	0.558	1.51521e-15
RAB3C	8.39986e-20	-0.339138	0.113	0.206	1.51819e-15
SCD5	8.4812e-20	-0.496092	0.115	0.218	1.53289e-15
APC	1.6694e-19	-0.562905	0.144	0.264	3.01727e-15
KCNH7	2.95666e-19	-1.0049	0.041	0.121	5.34386e-15
FRMD4A	3.04766e-19	-0.460043	0.093	0.179	5.50835e-15
TCF4	3.23132e-19	-0.937778	0.049	0.136	5.84029e-15
SLC1A5	6.17547e-19	1.05008	0.124	0.09	1.11615e-14
SOX6	6.31658e-19	-1.28503	0.054	0.149	1.14166e-14
SAT1	1.35484e-18	1.28043	0.106	0.056	2.44873e-14
CTXN1	1.75695e-18	-0.155962	0.267	0.384	3.17551e-14
PLXNA4	1.8839e-18	-0.71125	0.09	0.186	3.40496e-14
TMOD2	2.0299e-18	-0.647071	0.159	0.282	3.66883e-14
MAP2	2.58344e-18	-0.301906	0.51	0.658	4.66932e-14
PTPRT	2.89976e-18	-1.09517	0.057	0.137	5.24103e-14
CADM3	3.31036e-18	-0.345994	0.145	0.238	5.98314e-14
PTPRS	3.61286e-18	-0.25547	0.401	0.543	6.52989e-14
INA	4.37663e-18	-0.293434	0.293	0.432	7.91033e-14
ARF4	4.6142e-18	0.668115	0.309	0.259	8.3397e-14
RUNX1T1	5.44466e-18	-0.374199	0.156	0.253	9.84069e-14
SLC6A1	7.18612e-18	-0.435855	0.151	0.252	1.29882e-13
ZFHX3	7.7134e-18	1.48525	0.137	0.062	1.39412e-13
NOVA1	7.94865e-18	-0.197079	0.209	0.31	1.43664e-13
FBXL17	9.14868e-18	-0.28555	0.172	0.273	1.65353e-13
PPDPF	9.75813e-18	0.42008	0.368	0.366	1.76369e-13
TSPAN13	1.22103e-17	-0.229553	0.204	0.314	2.20689e-13
KIF5A	1.50643e-17	-0.770224	0.138	0.269	2.72273e-13
DNER	1.54789e-17	0.53292	0.277	0.278	2.79765e-13
GABRB3	1.95545e-17	-0.44017	0.123	0.223	3.53428e-13
DSTN	1.99602e-17	-0.269912	0.213	0.319	3.6076e-13
CALM2	2.58582e-17	-0.532149	0.191	0.328	4.6736e-13
GBX2	2.85104e-17	-0.913671	0.046	0.106	5.15296e-13
TLE5	3.07164e-17	-0.562633	0.137	0.25	5.55168e-13
BEX4	3.12022e-17	0.17945	0.29	0.346	5.63948e-13
CADM2	3.73886e-17	-0.747191	0.057	0.133	6.75762e-13
NFIB	3.86939e-17	-1.04921	0.037	0.112	6.99353e-13
KIF21B	4.14735e-17	-0.359869	0.25	0.382	7.49592e-13
WSB1	4.74161e-17	0.313806	0.654	0.677	8.56999e-13
GALNT14	5.39037e-17	-2.05512	0.008	0.052	9.74256e-13
C1orf61	5.87745e-17	-1.36173	0.068	0.193	1.06229e-12
RACK1	6.36732e-17	0.480769	0.334	0.33	1.15083e-12
C12orf57	6.88441e-17	0.244812	0.347	0.387	1.24429e-12
RTN1	8.13531e-17	-0.215314	0.406	0.538	1.47038e-12
EMC10	9.02331e-17	-0.138997	0.18	0.265	1.63087e-12
SOGA1	9.57089e-17	0.125297	0.158	0.213	1.72984e-12
MIDN	1.05081e-16	0.229012	0.281	0.323	1.89923e-12
NMNAT2	1.14e-16	-0.361018	0.174	0.277	2.06043e-12
STXBP1	1.44725e-16	-0.225775	0.248	0.36	2.61576e-12
GRIA4	1.45449e-16	-0.349178	0.074	0.132	2.62885e-12
NARS	1.50444e-16	0.478536	0.214	0.214	2.71912e-12
NEGR1	1.56395e-16	-1.37332	0.04	0.124	2.82668e-12
LENG8	1.62829e-16	0.387018	0.341	0.358	2.94298e-12
CADM4	1.95237e-16	-0.337782	0.24	0.355	3.52872e-12
RUFY3	1.99654e-16	-0.180551	0.234	0.343	3.60855e-12
MLLT11	2.07998e-16	-0.213164	0.478	0.618	3.75935e-12
MAPK10	2.08787e-16	-0.59173	0.144	0.258	3.77362e-12
DPYSL5	2.4841e-16	-0.111426	0.349	0.459	4.48976e-12
CD200	2.98958e-16	-0.308368	0.173	0.271	5.40336e-12
SOBP	3.47312e-16	-0.385176	0.177	0.283	6.27731e-12
SOGA3	4.05855e-16	-0.185113	0.279	0.384	7.33542e-12
CRMP1	4.12729e-16	-0.203941	0.437	0.565	7.45967e-12
WNK1	4.25255e-16	-0.15032	0.18	0.265	7.68606e-12
DDIT4	4.25899e-16	0.332928	0.297	0.305	7.69769e-12
PRDX5	4.49024e-16	0.43967	0.144	0.166	8.11567e-12
MAPT	4.69194e-16	-0.324663	0.305	0.438	8.48021e-12
ELAVL3	4.77373e-16	0.189928	0.354	0.409	8.62804e-12
NLK	5.02903e-16	-0.283575	0.195	0.301	9.08947e-12
EVL	5.2696e-16	-0.102888	0.384	0.497	9.52427e-12
DLGAP4	5.90475e-16	0.131233	0.19	0.243	1.06722e-11
TIPRL	6.10004e-16	0.392083	0.212	0.228	1.10252e-11
SRSF9	6.1587e-16	0.375715	0.154	0.18	1.11312e-11
JUND	6.67962e-16	0.137662	0.339	0.402	1.20727e-11
DYNC1I2	7.48856e-16	0.335132	0.267	0.286	1.35348e-11
PPP2R5E	7.72424e-16	0.644309	0.198	0.18	1.39608e-11
MAP6	8.72219e-16	-0.29023	0.242	0.351	1.57645e-11
NSG1	1.10061e-15	-0.202178	0.274	0.391	1.98924e-11
EDIL3	1.13738e-15	-0.621011	0.083	0.166	2.05571e-11
SEPTIN3	1.16702e-15	-0.253235	0.286	0.405	2.10927e-11
CMIP	1.17293e-15	-0.227707	0.212	0.314	2.11996e-11
HSPA8	1.29106e-15	0.103296	0.374	0.437	2.33346e-11
DOK6	1.39028e-15	-0.870679	0.049	0.118	2.5128e-11
FTH1	1.43332e-15	0.228672	0.553	0.586	2.59059e-11
SOX4	1.46208e-15	-0.167853	0.59	0.72	2.64257e-11
PTEN	1.6024e-15	-0.264472	0.106	0.175	2.89618e-11
SCD	1.68517e-15	0.476809	0.286	0.276	3.04577e-11
EEF1A2	1.91776e-15	-0.238551	0.261	0.376	3.46617e-11
PLS3	1.93517e-15	-1.15512	0.021	0.069	3.49763e-11
BSCL2	1.94218e-15	0.320642	0.272	0.289	3.51029e-11
MAPRE2	2.17108e-15	-0.239842	0.174	0.266	3.92401e-11
FGF14	2.27549e-15	-0.456814	0.108	0.19	4.11271e-11
LUC7L3	2.45374e-15	-0.163341	0.34	0.456	4.43489e-11
EPRS	2.57648e-15	0.340985	0.229	0.254	4.65673e-11
NOVA2	2.69682e-15	-0.233974	0.185	0.286	4.87423e-11
PGM2L1	2.76454e-15	-0.386864	0.109	0.194	4.99663e-11
TRIB2	2.85513e-15	-0.288422	0.21	0.31	5.16036e-11
DCC	2.89631e-15	-0.354703	0.117	0.201	5.2348e-11
MARCKSL1	2.9597e-15	-0.173317	0.597	0.726	5.34937e-11
AMER2	3.02536e-15	-0.55476	0.068	0.146	5.46803e-11
NRXN3	3.5628e-15	-0.425347	0.088	0.169	6.43941e-11
FADS2	3.70546e-15	0.223033	0.295	0.339	6.69726e-11
KIDINS220	3.80021e-15	-0.130767	0.27	0.379	6.8685e-11
LDB1	3.85728e-15	0.112263	0.322	0.387	6.97164e-11
DDIT3	3.95705e-15	0.834043	0.16	0.124	7.15198e-11
DTX3	4.0313e-15	0.118533	0.142	0.192	7.28617e-11
TRA2A	5.28537e-15	-0.258292	0.231	0.338	9.55279e-11
COPG1	6.38292e-15	0.239798	0.26	0.297	1.15365e-10
EIF4A1	6.49429e-15	0.17022	0.314	0.363	1.17378e-10
SEPTIN5	6.60285e-15	-0.119151	0.276	0.373	1.1934e-10
MIF	7.0737e-15	0.319801	0.282	0.309	1.2785e-10
TLE4	7.43096e-15	1.15635	0.129	0.08	1.34307e-10
RAB3B	8.09477e-15	-0.720369	0.053	0.122	1.46305e-10
MAT2A	8.65005e-15	-0.223353	0.257	0.36	1.56341e-10
LMO3	9.64375e-15	-0.231923	0.226	0.32	1.74301e-10
ATP5F1E	9.82723e-15	0.102406	0.212	0.266	1.77617e-10
ASIC1	1.03166e-14	-0.565972	0.099	0.187	1.86463e-10
ATAT1	1.04628e-14	-0.12255	0.261	0.357	1.89104e-10
UTRN	1.1233e-14	-0.788526	0.043	0.101	2.03025e-10
MYO5A	1.12362e-14	-0.460854	0.123	0.206	2.03084e-10
PCSK1N	1.1713e-14	-0.256734	0.265	0.373	2.11701e-10
SYT1	1.22189e-14	-0.187895	0.229	0.331	2.20844e-10
BTG1	1.35092e-14	0.290797	0.227	0.241	2.44164e-10
MBIP	1.40736e-14	-0.773856	0.085	0.18	2.54366e-10
UBA52	1.45948e-14	0.285699	0.351	0.376	2.63786e-10
TTYH1	1.58326e-14	0.245764	0.195	0.223	2.86159e-10
YWHAZ	1.62891e-14	0.156296	0.304	0.362	2.94409e-10
ZNF462	1.65245e-14	-0.209245	0.161	0.241	2.98664e-10
TMEFF1	1.72181e-14	-0.204329	0.292	0.408	3.112e-10
DLG4	1.78776e-14	-0.149247	0.286	0.39	3.23119e-10
POU3F3	1.88506e-14	0.902367	0.166	0.122	3.40705e-10
MCF2L	2.08462e-14	-0.372739	0.166	0.271	3.76774e-10
CAMK2N1	2.08766e-14	-0.485346	0.173	0.286	3.77323e-10
GPM6B	2.14088e-14	0.28408	0.189	0.213	3.86944e-10
PSAP	2.17315e-14	0.13418	0.242	0.291	3.92774e-10
SCG5	2.19383e-14	-0.473177	0.139	0.243	3.96512e-10
CCNG1	2.39502e-14	0.912058	0.136	0.1	4.32876e-10
DDAH2	2.54328e-14	0.33304	0.253	0.272	4.59672e-10
ATXN7L3B	2.8197e-14	-0.168507	0.234	0.326	5.09632e-10
ZNF536	2.82338e-14	-1.59351	0.022	0.082	5.10298e-10
NHP2	2.88704e-14	0.157109	0.246	0.288	5.21803e-10
TMEM59L	3.1614e-14	-0.23454	0.272	0.383	5.71391e-10
CLTB	3.42097e-14	-0.178184	0.101	0.16	6.18307e-10
UBB	3.426e-14	0.123794	0.261	0.322	6.19215e-10
PDZD4	3.56917e-14	-0.425066	0.127	0.218	6.45091e-10
IMPDH2	3.71155e-14	0.583429	0.15	0.146	6.70825e-10
ENO2	3.78112e-14	0.34143	0.548	0.548	6.83399e-10
SCG3	4.3201e-14	-0.145929	0.198	0.276	7.80815e-10
LSM7	4.32273e-14	0.22753	0.231	0.269	7.8129e-10
SSBP2	4.91594e-14	-0.538635	0.098	0.187	8.88507e-10
MAPK8IP1	5.4752e-14	-0.272575	0.186	0.278	9.89589e-10
GSTP1	5.48407e-14	0.542546	0.239	0.22	9.9119e-10
IRF2BPL	5.54401e-14	-0.463747	0.087	0.164	1.00202e-09
ATP9A	5.72266e-14	-0.36525	0.192	0.297	1.03431e-09
EIF1B	5.87267e-14	0.127758	0.305	0.36	1.06143e-09
AGAP1	6.19411e-14	-0.336419	0.187	0.288	1.11952e-09
ZNF711	6.26573e-14	-0.610989	0.119	0.212	1.13247e-09
CTNNA2	6.58773e-14	-0.259013	0.092	0.155	1.19067e-09
LANCL1	6.65087e-14	-0.28012	0.089	0.152	1.20208e-09
TSPAN3	6.7897e-14	0.268665	0.381	0.409	1.22717e-09
DIPK2A	6.7958e-14	-0.378847	0.061	0.127	1.22827e-09
CUL4B	6.90949e-14	0.206923	0.138	0.178	1.24882e-09
RNF5	7.08892e-14	0.150207	0.194	0.236	1.28125e-09
GPX4	7.50144e-14	0.154106	0.312	0.367	1.35581e-09
SAMD5	7.6007e-14	-1.39221	0.025	0.087	1.37375e-09
OLFM2	7.88084e-14	-0.47548	0.071	0.137	1.42438e-09
NCAN	9.13728e-14	-0.190504	0.176	0.261	1.65147e-09
NDUFA4	1.00803e-13	0.165064	0.315	0.372	1.82191e-09
HBS1L	1.10194e-13	0.175355	0.236	0.277	1.99164e-09
CLSTN1	1.11358e-13	-0.135551	0.229	0.313	2.01268e-09
HSP90AA1	1.14593e-13	0.188262	0.386	0.432	2.07115e-09
SEZ6L	1.21438e-13	-0.803318	0.073	0.148	2.19487e-09
PODXL2	1.2572e-13	-0.208024	0.153	0.226	2.27227e-09
WDR33	1.29961e-13	-0.114098	0.175	0.252	2.34892e-09
OAZ1	1.30687e-13	0.121973	0.497	0.56	2.36203e-09
WARS	1.3331e-13	0.67765	0.149	0.127	2.40945e-09
AEBP2	1.37448e-13	0.204582	0.152	0.187	2.48424e-09
TUSC3	1.54745e-13	0.113885	0.229	0.281	2.79685e-09
LRRC7	1.56661e-13	-0.255671	0.17	0.253	2.83148e-09
ARX	1.72603e-13	-0.237176	0.107	0.177	3.11963e-09
SRGAP3	1.76493e-13	-0.155272	0.101	0.161	3.18994e-09
ERO1B	1.80249e-13	-0.702473	0.045	0.104	3.25781e-09
PNMA1	1.85151e-13	-0.231793	0.179	0.271	3.34643e-09
PIK3R3	1.90001e-13	-0.174587	0.166	0.249	3.43407e-09
TMSB4X	2.07489e-13	-0.211776	0.74	0.835	3.75016e-09
ABAT	2.11525e-13	-0.212423	0.214	0.314	3.82311e-09
PAFAH1B1	2.24585e-13	-0.121926	0.308	0.403	4.05914e-09
QARS	2.24946e-13	0.639796	0.146	0.136	4.06568e-09
GPR173	2.26058e-13	0.163108	0.239	0.283	4.08576e-09
NDUFS1	2.34367e-13	0.132696	0.119	0.156	4.23595e-09
ODC1	2.35965e-13	0.320231	0.177	0.193	4.26482e-09
UBE2E3	2.41879e-13	-0.280265	0.189	0.283	4.37172e-09
ZEB1	2.4265e-13	0.328927	0.103	0.124	4.38565e-09
KDM1A	2.59272e-13	-0.147298	0.18	0.269	4.68608e-09
CAMK2N2	2.7659e-13	-0.22224	0.121	0.19	4.99908e-09
SEC62	2.77181e-13	0.110914	0.204	0.258	5.00977e-09
SDC3	3.41548e-13	-0.219063	0.257	0.355	6.17313e-09
MPRIP	3.45526e-13	-0.313837	0.115	0.192	6.24504e-09
BNIP3L	3.51644e-13	0.307483	0.383	0.394	6.35561e-09
NDUFB8	3.56686e-13	-0.13821	0.131	0.193	6.44675e-09
ARHGAP35	3.85135e-13	0.171749	0.233	0.269	6.96092e-09
VASH1	3.89755e-13	-0.212332	0.142	0.219	7.04444e-09
XAB2	4.04447e-13	0.427645	0.097	0.113	7.30998e-09
ZNF428	4.12807e-13	-0.311908	0.233	0.337	7.46108e-09
ST8SIA4	4.36085e-13	-1.42365	0.042	0.133	7.8818e-09
C11orf96	4.67614e-13	-0.835092	0.071	0.155	8.45165e-09
UBXN1	4.85887e-13	-0.301714	0.091	0.153	8.78193e-09
SUGT1	4.96045e-13	0.174226	0.201	0.238	8.96551e-09
GRIA2	5.03125e-13	0.11311	0.234	0.283	9.09349e-09
CAMSAP2	5.1112e-13	-0.194627	0.251	0.349	9.23798e-09
BACH1	5.95221e-13	0.354227	0.17	0.192	1.0758e-08
PGAM1	6.51962e-13	0.236659	0.091	0.123	1.17836e-08
EIF4A2	6.78061e-13	-0.306507	0.133	0.218	1.22553e-08
ADGRV1	7.12869e-13	-0.723588	0.074	0.163	1.28844e-08
ZIC1	7.24042e-13	-0.106217	0.255	0.351	1.30863e-08
SEC13	7.44121e-13	0.322986	0.218	0.236	1.34492e-08
DCTN2	7.82757e-13	0.276241	0.209	0.243	1.41475e-08
COPB2	7.8446e-13	0.220447	0.219	0.248	1.41783e-08
CORO2B	8.14234e-13	-0.349326	0.116	0.197	1.47165e-08
EPHB1	8.53191e-13	-0.391804	0.059	0.117	1.54206e-08
GLCE	8.56097e-13	-0.691632	0.091	0.176	1.54731e-08
STT3A	8.75131e-13	0.49111	0.213	0.202	1.58171e-08
RAB6A	8.8059e-13	0.130889	0.246	0.301	1.59158e-08
GAS7	8.93689e-13	-0.238861	0.075	0.122	1.61525e-08
QKI	8.97522e-13	0.225477	0.176	0.209	1.62218e-08
TNIK	1.00519e-12	-0.378477	0.133	0.216	1.81678e-08
GRK2	1.01527e-12	-0.117058	0.115	0.173	1.83499e-08
SNRNP40	1.03214e-12	0.120554	0.099	0.135	1.86548e-08
ANKRD12	1.03678e-12	0.220764	0.153	0.179	1.87387e-08
CNIH2	1.04684e-12	-0.160619	0.25	0.343	1.89207e-08
NBEA	1.09228e-12	-0.444292	0.086	0.151	1.97418e-08
SMARCC2	1.12399e-12	-0.30107	0.17	0.259	2.03149e-08
EMC7	1.16308e-12	0.215082	0.182	0.215	2.10215e-08
CLDND1	1.17322e-12	-0.1563	0.114	0.172	2.12049e-08
PRPF40A	1.17569e-12	0.393889	0.21	0.222	2.12494e-08
JPT1	1.2679e-12	-0.408248	0.135	0.221	2.2916e-08
LY6H	1.26818e-12	-0.132122	0.145	0.208	2.2921e-08
PLXNA2	1.36586e-12	-0.294536	0.093	0.158	2.46866e-08
TLE2	1.52939e-12	-1.79015	0.015	0.073	2.76423e-08
FASN	1.60953e-12	0.19253	0.235	0.274	2.90906e-08
STX1B	1.61255e-12	-0.233316	0.101	0.165	2.91452e-08
KMT2E	1.62704e-12	-0.464239	0.135	0.235	2.94071e-08
JUN	1.65775e-12	0.401805	0.194	0.183	2.99623e-08
TCEAL2	1.66812e-12	-0.191328	0.078	0.13	3.01497e-08
ADD2	1.69546e-12	-0.295887	0.139	0.212	3.06437e-08
CACNB3	1.77555e-12	-0.650361	0.06	0.13	3.20913e-08
MACF1	1.80639e-12	-0.267182	0.177	0.265	3.26486e-08
PKIA	1.82399e-12	-0.373505	0.213	0.318	3.29668e-08
RNPS1	1.83792e-12	0.277631	0.19	0.211	3.32186e-08
PHIP	1.92429e-12	-0.203165	0.11	0.173	3.47796e-08
RNF10	1.93414e-12	-0.197469	0.135	0.201	3.49576e-08
SLC38A2	2.08639e-12	0.130247	0.134	0.178	3.77095e-08
TSPAN7	2.14696e-12	-0.372314	0.173	0.266	3.88041e-08
MAPK8	2.21559e-12	-0.105119	0.133	0.192	4.00446e-08
AFDN	2.22281e-12	0.142487	0.202	0.259	4.01751e-08
WDR26	2.37497e-12	-0.158925	0.208	0.287	4.29252e-08
TMEM259	2.42341e-12	0.176596	0.285	0.336	4.38007e-08
MAGED2	2.60267e-12	0.180515	0.452	0.493	4.70406e-08
C16orf58	2.61023e-12	0.255903	0.143	0.168	4.71773e-08
CMPK1	2.6194e-12	0.100137	0.157	0.198	4.73431e-08
SEC31A	2.62578e-12	0.276493	0.346	0.362	4.74583e-08
GPHN	2.62825e-12	-0.184359	0.111	0.166	4.75029e-08
DLGAP1	2.69115e-12	-0.79456	0.052	0.11	4.86398e-08
EIF1	2.72678e-12	0.369496	0.316	0.317	4.92839e-08
NRXN2	2.7385e-12	-0.199868	0.192	0.271	4.94957e-08
KDM5B	2.7689e-12	-0.176008	0.182	0.267	5.0045e-08
TTBK2	2.81088e-12	-0.542419	0.053	0.108	5.08039e-08
TMEM8B	2.8119e-12	0.199637	0.18	0.212	5.08222e-08
PCM1	2.86057e-12	0.176129	0.227	0.264	5.1702e-08
CCDC82	2.91397e-12	0.170423	0.169	0.21	5.26671e-08
AKIRIN2	3.08026e-12	-0.211307	0.186	0.267	5.56726e-08
CHD2	3.1147e-12	0.25816	0.276	0.298	5.62951e-08
ANKRD11	3.17591e-12	0.306872	0.187	0.205	5.74014e-08
PPP2R2B	3.19576e-12	-0.252417	0.098	0.159	5.77602e-08
STMN4	3.29607e-12	-0.137326	0.347	0.453	5.95731e-08
NUDC	3.49773e-12	-0.357811	0.124	0.204	6.3218e-08
ECEL1	3.57159e-12	-0.214613	0.156	0.237	6.45528e-08
NES	3.61979e-12	0.386554	0.268	0.279	6.54241e-08
TIAL1	3.77074e-12	0.294238	0.195	0.217	6.81524e-08
EML5	3.79372e-12	-0.703763	0.059	0.127	6.85677e-08
CSRNP3	4.00646e-12	-0.157195	0.169	0.242	7.24127e-08
L1CAM	4.01906e-12	-0.216199	0.207	0.306	7.26404e-08
ELAVL1	4.12318e-12	0.258289	0.208	0.236	7.45223e-08
DAB2IP	4.12921e-12	-0.580126	0.058	0.116	7.46313e-08
PDZRN4	4.21097e-12	-7.82464	0	0.023	7.61091e-08
SESTD1	4.29219e-12	-0.235563	0.172	0.25	7.75771e-08
SLC38A1	4.32662e-12	0.122102	0.246	0.298	7.81994e-08
LEPROTL1	4.34092e-12	-0.108854	0.144	0.213	7.84578e-08
AKT1	4.43069e-12	-0.434068	0.136	0.222	8.00803e-08
ADGRB2	4.69191e-12	0.150881	0.156	0.195	8.48016e-08
PPP3R1	4.69278e-12	0.196744	0.219	0.257	8.48173e-08
NDN	4.75888e-12	-0.328376	0.144	0.224	8.6012e-08
JPH4	4.92373e-12	-0.298791	0.161	0.244	8.89915e-08
VGF	5.00222e-12	0.316376	0.233	0.248	9.04101e-08
KMT2A	5.31563e-12	0.179164	0.161	0.195	9.60747e-08
XKR6	5.32556e-12	-0.427614	0.109	0.183	9.62542e-08
CALM3	5.3311e-12	-0.278203	0.277	0.385	9.63544e-08
ERH	5.45204e-12	0.172639	0.208	0.244	9.85402e-08
SCN3B	5.49866e-12	-0.339147	0.263	0.372	9.93829e-08
IGSF21	5.57112e-12	-2.9673	0.007	0.048	1.00692e-07
CHD3	5.64301e-12	0.169507	0.157	0.195	1.01992e-07
GNG2	5.79786e-12	-0.399913	0.291	0.416	1.04791e-07
NR2F1	5.85199e-12	0.644546	0.06	0.063	1.05769e-07
H3F3B	6.0486e-12	-0.119567	0.171	0.233	1.09322e-07
DDX6	6.18517e-12	-0.166853	0.172	0.243	1.11791e-07
CNOT2	6.23512e-12	-0.422895	0.068	0.124	1.12694e-07
TCERG1	6.51897e-12	0.160866	0.197	0.242	1.17824e-07
NDUFB11	6.79507e-12	0.206654	0.145	0.177	1.22814e-07
PPM1E	6.80835e-12	-0.436907	0.042	0.089	1.23054e-07
EIF4B	6.83204e-12	0.291391	0.089	0.111	1.23482e-07
RNF187	6.93567e-12	0.270897	0.304	0.323	1.25355e-07
TMEM178B	7.49026e-12	-0.36984	0.173	0.262	1.35379e-07
OCIAD2	7.9421e-12	-0.48615	0.099	0.167	1.43546e-07
MT-ND4	8.20455e-12	-0.131379	0.768	0.859	1.48289e-07
UCHL1	8.83246e-12	0.144185	0.676	0.723	1.59638e-07
EPC1	8.86861e-12	-0.146304	0.161	0.228	1.60291e-07
SQSTM1	9.00202e-12	0.447451	0.194	0.175	1.62703e-07
SCAMP1	9.00863e-12	-0.278721	0.132	0.209	1.62822e-07
MEAF6	9.04208e-12	-0.245938	0.208	0.304	1.63427e-07
CLCN6	9.09873e-12	0.389502	0.137	0.154	1.64451e-07
VPS45	9.44032e-12	0.157278	0.159	0.196	1.70624e-07
ATP6AP1	9.91777e-12	0.155933	0.246	0.29	1.79254e-07
KMT5B	1.00058e-11	-0.278046	0.142	0.216	1.80844e-07
TXNIP	1.02737e-11	-0.256516	0.324	0.431	1.85687e-07
RCN1	1.04228e-11	1.10274	0.107	0.065	1.88382e-07
ARHGEF9	1.04455e-11	-0.369405	0.119	0.195	1.88792e-07
ARL4C	1.06052e-11	-0.996183	0.049	0.123	1.91678e-07
SLC4A8	1.06852e-11	-0.378431	0.144	0.227	1.93124e-07
PFN2	1.07477e-11	-0.372954	0.346	0.486	1.94254e-07
LRRTM3	1.10467e-11	-0.323444	0.05	0.098	1.99657e-07
HNRNPDL	1.18162e-11	0.241333	0.219	0.247	2.13565e-07
SHH	1.19709e-11	-2.39714	0.008	0.049	2.16362e-07
PJA1	1.22002e-11	-0.175126	0.123	0.182	2.20506e-07
FOXO6	1.25788e-11	-0.84311	0.031	0.08	2.2735e-07
TFG	1.28844e-11	-0.131549	0.09	0.136	2.32873e-07
UBE2D2	1.29072e-11	0.295305	0.118	0.138	2.33285e-07
PANK3	1.29685e-11	0.223847	0.151	0.187	2.34392e-07
UBN2	1.32728e-11	0.133103	0.12	0.155	2.39892e-07
NUP58	1.34756e-11	0.224821	0.178	0.208	2.43557e-07
EEF2	1.35496e-11	0.388528	0.488	0.477	2.44896e-07
KLHL7	1.36042e-11	0.128373	0.138	0.18	2.45883e-07
ZRANB2	1.4075e-11	0.277252	0.222	0.238	2.54392e-07
RAB6B	1.43608e-11	-0.180064	0.296	0.394	2.59557e-07
NSF	1.46593e-11	-0.225453	0.136	0.205	2.64952e-07
COX14	1.47403e-11	0.110229	0.117	0.157	2.66417e-07
KCTD13	1.51126e-11	-0.668942	0.062	0.133	2.73146e-07
ARMCX3	1.51465e-11	-0.171112	0.111	0.176	2.73758e-07
DCHS1	1.5318e-11	-0.323874	0.123	0.195	2.76857e-07
SLC9A6	1.5328e-11	-0.757276	0.054	0.122	2.77039e-07
HIPK3	1.54561e-11	0.17245	0.181	0.222	2.79354e-07
RAB11B	1.54922e-11	-0.265604	0.348	0.461	2.80007e-07
KMT2C	1.55176e-11	0.209746	0.217	0.252	2.80464e-07
SAP18	1.62716e-11	-0.13182	0.163	0.229	2.94092e-07
PNMA2	1.63637e-11	0.118147	0.205	0.249	2.95758e-07
MAF1	1.67088e-11	0.44069	0.141	0.15	3.01994e-07
GAP43	1.7175e-11	0.371682	0.259	0.266	3.10422e-07
CORO1C	1.73894e-11	-0.23921	0.188	0.277	3.14296e-07
EMD	1.76695e-11	0.249974	0.203	0.227	3.19359e-07
DOK4	1.98898e-11	-0.357204	0.096	0.162	3.59488e-07
RPAIN	2.00085e-11	-0.435351	0.116	0.2	3.61633e-07
TNRC6C	2.03551e-11	-0.255167	0.122	0.188	3.67898e-07
NDUFAB1	2.19688e-11	0.228051	0.208	0.236	3.97065e-07
UQCRB	2.28961e-11	0.177775	0.095	0.122	4.13824e-07
SLC22A17	2.29523e-11	-0.200849	0.25	0.348	4.14839e-07
MAPRE3	2.30529e-11	-0.265214	0.178	0.26	4.16657e-07
SEC11A	2.32081e-11	0.181543	0.187	0.221	4.19463e-07
XKR4	2.33471e-11	-0.438572	0.056	0.108	4.21976e-07
FAM171A2	2.39941e-11	-0.354738	0.163	0.255	4.33669e-07
CHGB	2.4063e-11	-0.563528	0.098	0.173	4.34914e-07
NT5C3B	2.42371e-11	-0.222977	0.084	0.138	4.38062e-07
PKNOX2	2.45366e-11	-0.447137	0.038	0.086	4.43474e-07
RSF1	2.54144e-11	-0.111854	0.099	0.154	4.5934e-07
PRKACB	2.55705e-11	-0.200975	0.183	0.26	4.62162e-07
DTD1	2.59143e-11	0.132064	0.183	0.221	4.68375e-07
CTNND2	2.61287e-11	-0.245838	0.144	0.213	4.72251e-07
TUBB2A	2.62642e-11	-0.208775	0.378	0.489	4.74699e-07
BEX3	2.83866e-11	-0.159443	0.371	0.474	5.13059e-07
FARP1	2.84395e-11	-0.318927	0.134	0.21	5.14016e-07
TRIM2	2.86893e-11	-0.1466	0.225	0.3	5.18531e-07
TNPO2	2.87069e-11	-0.143952	0.248	0.335	5.18848e-07
TMED4	2.87874e-11	0.161876	0.162	0.193	5.20304e-07
CAPRIN1	2.95544e-11	-0.33743	0.091	0.155	5.34166e-07
RIPOR2	3.07849e-11	-0.197279	0.086	0.136	5.56406e-07
P4HA1	3.15348e-11	0.442513	0.113	0.126	5.69961e-07
MYEF2	3.16164e-11	0.146882	0.329	0.38	5.71435e-07
CASK	3.16306e-11	0.137307	0.212	0.253	5.71691e-07
SENP6	3.19848e-11	0.151385	0.282	0.33	5.78093e-07
SLC3A2	3.3414e-11	0.263723	0.257	0.273	6.03925e-07
LDHB	3.44277e-11	0.189023	0.255	0.292	6.22246e-07
PSMB1	3.478e-11	0.204459	0.234	0.272	6.28613e-07
ITM2C	3.48216e-11	-0.473874	0.184	0.298	6.29366e-07
ARHGEF7	3.48401e-11	-0.268564	0.148	0.224	6.29701e-07
ZNRF1	3.53889e-11	-0.226772	0.161	0.234	6.39619e-07
NARF	3.57476e-11	-0.13621	0.138	0.206	6.46103e-07
WDR45B	3.59105e-11	0.390456	0.148	0.159	6.49047e-07
ARHGEF4	3.61005e-11	-0.274611	0.05	0.092	6.52481e-07
ZMIZ2	3.61595e-11	-0.209816	0.167	0.244	6.53547e-07
PAM16	3.69183e-11	0.278963	0.111	0.133	6.67261e-07
PSAT1	3.72138e-11	0.666835	0.129	0.111	6.72602e-07
MSN	3.8246e-11	1.50943	0.058	0.023	6.91259e-07
CFDP1	3.96686e-11	0.173957	0.191	0.227	7.1697e-07
CDH2	3.96913e-11	0.141279	0.256	0.297	7.17381e-07
RNF7	4.11342e-11	0.250186	0.257	0.284	7.43459e-07
MYH10	4.25444e-11	0.156998	0.162	0.193	7.68948e-07
MVB12B	4.28341e-11	-0.273083	0.087	0.141	7.74184e-07
RETREG2	4.33495e-11	0.14475	0.127	0.163	7.83499e-07
AK1	4.48309e-11	-0.154874	0.06	0.105	8.10273e-07
EGLN3	4.51552e-11	1.19075	0.059	0.042	8.16135e-07
XPR1	4.58605e-11	0.162282	0.251	0.293	8.28883e-07
DNAJC10	4.80997e-11	0.289317	0.126	0.146	8.69355e-07
RBM5	4.85605e-11	-0.184695	0.174	0.244	8.77682e-07
HERPUD1	4.94801e-11	0.551062	0.149	0.129	8.94303e-07
MPPED2	4.97866e-11	-0.226163	0.123	0.191	8.99842e-07
SMARCA1	5.04512e-11	-0.160494	0.101	0.154	9.11856e-07
TNC	5.05478e-11	-0.803571	0.047	0.112	9.136e-07
SLC32A1	5.2253e-11	-0.31905	0.12	0.184	9.44421e-07
NME1	5.28486e-11	0.261173	0.133	0.162	9.55186e-07
LMO4	5.32507e-11	-0.140009	0.136	0.201	9.62452e-07
DYNLT1	5.3478e-11	0.354406	0.19	0.208	9.66561e-07
SMARCD3	5.36319e-11	-0.503786	0.136	0.223	9.69344e-07
GOSR2	5.38883e-11	0.1429	0.207	0.249	9.73977e-07
MDGA2	5.39575e-11	-0.976337	0.03	0.082	9.75229e-07
ROBO2	5.42279e-11	-0.519564	0.068	0.125	9.80114e-07
FBXO30	5.4803e-11	-0.328015	0.076	0.131	9.90509e-07
CLPTM1	5.50975e-11	-0.113467	0.161	0.222	9.95832e-07
PCLO	5.5159e-11	-0.312722	0.127	0.194	9.96943e-07
DCX	5.64774e-11	-0.154407	0.585	0.694	1.02077e-06
MOCS2	5.68495e-11	-0.40881	0.081	0.137	1.0275e-06
RBM3	5.876e-11	0.423515	0.187	0.194	1.06203e-06
AKR1B1	6.09731e-11	-0.151713	0.166	0.231	1.10203e-06
SRRM4	6.23084e-11	-0.628485	0.073	0.138	1.12616e-06
ACSL3	6.2558e-11	0.134323	0.151	0.187	1.13067e-06
PHPT1	6.28482e-11	0.179222	0.334	0.373	1.13592e-06
SUDS3	6.36593e-11	0.434234	0.096	0.109	1.15058e-06
ERGIC3	6.40208e-11	0.248363	0.278	0.301	1.15711e-06
BRI3	6.86003e-11	0.177001	0.259	0.296	1.23988e-06
MAP4	6.98672e-11	0.328517	0.274	0.277	1.26278e-06
CLU	7.14572e-11	0.657836	0.164	0.138	1.29152e-06
GNAQ	7.15646e-11	-0.176793	0.169	0.244	1.29346e-06
DNAJA2	7.21168e-11	-0.149373	0.184	0.257	1.30344e-06
NDUFB7	7.30139e-11	0.102023	0.151	0.194	1.31965e-06
C9orf16	7.61756e-11	-0.488367	0.066	0.128	1.3768e-06
RNF130	7.66452e-11	0.312565	0.153	0.172	1.38529e-06
USP9X	7.69936e-11	-0.133297	0.113	0.175	1.39158e-06
ARMCX1	7.97546e-11	0.533509	0.141	0.14	1.44148e-06
SCG2	7.98881e-11	-0.347172	0.112	0.181	1.4439e-06
WHRN	8.05685e-11	-0.445474	0.072	0.137	1.4562e-06
HES1	8.22411e-11	0.995777	0.045	0.034	1.48642e-06
TBC1D24	8.24329e-11	-0.4686	0.052	0.1	1.48989e-06
CDKN1B	8.33999e-11	0.238293	0.189	0.218	1.50737e-06
FXYD6	8.35404e-11	-0.128348	0.482	0.593	1.50991e-06
RANBP9	8.81723e-11	-0.167774	0.127	0.184	1.59363e-06
FAM13C	8.8383e-11	-0.330677	0.062	0.111	1.59743e-06
LYPD1	8.91201e-11	-0.670067	0.025	0.066	1.61076e-06
RAB3A	9.2284e-11	-0.192067	0.175	0.255	1.66794e-06
PPFIA2	9.27469e-11	-0.223463	0.075	0.122	1.67631e-06
SELENOH	9.58525e-11	0.152811	0.301	0.335	1.73244e-06
VSTM2A	9.62856e-11	-0.915985	0.059	0.122	1.74027e-06
N4BP2L2	9.69062e-11	0.300685	0.174	0.193	1.75148e-06
METTL9	9.84345e-11	-0.29888	0.174	0.253	1.77911e-06
SLC16A1	9.92533e-11	0.721402	0.096	0.089	1.7939e-06
KCNF1	9.94292e-11	-0.794735	0.015	0.05	1.79708e-06
SPCS1	1.01851e-10	0.250881	0.227	0.244	1.84086e-06
ETNK1	1.02289e-10	-0.212912	0.164	0.237	1.84878e-06
ZNF608	1.03349e-10	-0.56487	0.101	0.173	1.86793e-06
WNK2	1.07557e-10	-0.211519	0.129	0.199	1.94398e-06
PCDH10	1.0763e-10	0.408467	0.084	0.093	1.9453e-06
IP6K2	1.09678e-10	-0.210436	0.158	0.234	1.98231e-06
SRCIN1	1.0991e-10	-0.355729	0.083	0.136	1.98651e-06
RTCB	1.13871e-10	0.338569	0.142	0.158	2.05811e-06
KLHDC2	1.18248e-10	-0.12385	0.11	0.17	2.13721e-06
BTAF1	1.19991e-10	0.202781	0.154	0.184	2.16871e-06
PPIA	1.221e-10	-0.287447	0.106	0.171	2.20683e-06
ZC3H15	1.24323e-10	0.242861	0.13	0.155	2.24702e-06
PTBP3	1.29916e-10	-0.372251	0.105	0.166	2.3481e-06
NDST1	1.30374e-10	-0.717548	0.059	0.117	2.35638e-06
SETBP1	1.3255e-10	-0.231068	0.141	0.207	2.39571e-06
BRWD1	1.35231e-10	-0.184319	0.122	0.184	2.44417e-06
MTURN	1.36214e-10	0.137678	0.119	0.154	2.46193e-06
MXRA7	1.42356e-10	0.177365	0.185	0.22	2.57294e-06
SPINT2	1.43562e-10	0.147079	0.133	0.172	2.59474e-06
NGRN	1.4469e-10	0.101646	0.184	0.223	2.61512e-06
PPP1R1A	1.46044e-10	-0.183037	0.081	0.133	2.63959e-06
CNR1	1.46316e-10	-0.449794	0.074	0.127	2.64452e-06
MTHFD2	1.49011e-10	0.717275	0.085	0.072	2.69322e-06
PICALM	1.49068e-10	-0.365663	0.094	0.169	2.69426e-06
CDK9	1.52495e-10	-0.527202	0.095	0.171	2.75619e-06
PRMT1	1.53029e-10	0.138419	0.142	0.176	2.76585e-06
ZNF532	1.54002e-10	0.12321	0.241	0.283	2.78343e-06
ABR	1.56668e-10	-0.245637	0.112	0.174	2.83162e-06
C7orf50	1.58023e-10	-0.115781	0.168	0.231	2.85611e-06
GNB4	1.58578e-10	1.48967	0.055	0.027	2.86614e-06
IRX1	1.59779e-10	3.56038	0.014	0.002	2.88785e-06
VWA5A	1.63423e-10	-0.466458	0.101	0.172	2.95371e-06
AKAP9	1.63697e-10	-0.175611	0.157	0.224	2.95867e-06
BHLHE40	1.72363e-10	1.18195	0.06	0.038	3.11528e-06
ZFP36L1	1.85255e-10	0.757116	0.103	0.083	3.34829e-06
EEF1G	1.90235e-10	0.148034	0.387	0.446	3.43831e-06
AP1S2	1.94137e-10	-0.458569	0.072	0.129	3.50883e-06
SERINC3	1.94402e-10	0.210838	0.127	0.152	3.51363e-06
CDK13	1.99002e-10	0.551745	0.117	0.113	3.59676e-06
SCARB2	1.99047e-10	0.239335	0.188	0.205	3.59757e-06
EIF4E2	2.02852e-10	-0.177394	0.106	0.155	3.66634e-06
TXNL4A	2.05126e-10	-0.104999	0.181	0.251	3.70745e-06
HEXA	2.06483e-10	-0.309951	0.075	0.128	3.73197e-06
POLR3D	2.08131e-10	0.394529	0.097	0.108	3.76177e-06
HSP90AB1	2.13434e-10	0.169286	0.35	0.382	3.8576e-06
NLGN2	2.13566e-10	-0.740895	0.073	0.157	3.85998e-06
CCNG2	2.16974e-10	-0.164017	0.13	0.192	3.9216e-06
LAPTM4B	2.1829e-10	0.117992	0.205	0.246	3.94537e-06
TCAF1	2.20213e-10	-0.499191	0.137	0.229	3.98012e-06
SMS	2.22221e-10	0.40107	0.194	0.189	4.01643e-06
RUNDC3A	2.24281e-10	-0.178654	0.127	0.185	4.05365e-06
LAMTOR3	2.26082e-10	0.184007	0.137	0.16	4.08621e-06
RNMT	2.28117e-10	0.280944	0.164	0.181	4.12298e-06
PSD	2.30802e-10	-0.100312	0.194	0.261	4.17152e-06
EBF1	2.3633e-10	2.52129	0.028	0.005	4.27143e-06
DR1	2.45719e-10	0.444668	0.097	0.103	4.44112e-06
SLC5A3	2.49833e-10	-0.118767	0.096	0.143	4.51549e-06
RGS8	2.5148e-10	-0.577951	0.038	0.09	4.54525e-06
ARHGEF12	2.61825e-10	-0.509902	0.133	0.213	4.73222e-06
CYFIP2	2.64836e-10	-0.203006	0.163	0.229	4.78664e-06
NTRK3	2.65988e-10	-0.29481	0.101	0.164	4.80747e-06
LAMTOR1	2.66879e-10	0.264356	0.19	0.218	4.82357e-06
DNAJB2	2.68405e-10	0.228793	0.158	0.179	4.85115e-06
LMBRD2	2.69693e-10	0.736017	0.127	0.108	4.87444e-06
DNAJC7	2.83233e-10	-0.108663	0.125	0.184	5.11916e-06
TOMM20	2.84858e-10	0.12189	0.28	0.325	5.14852e-06
ILF3	2.90744e-10	0.166857	0.275	0.309	5.25491e-06
B3GALT5	2.92317e-10	-0.78467	0.014	0.046	5.28334e-06
SMARCA4	2.94327e-10	-0.160497	0.301	0.396	5.31967e-06
MAFB	3.0353e-10	-1.58131	0.012	0.045	5.486e-06
DYNLL2	3.0644e-10	-0.144711	0.489	0.598	5.53859e-06
COG3	3.09224e-10	0.330324	0.163	0.181	5.58891e-06
ENO1	3.11262e-10	0.254512	0.16	0.182	5.62574e-06
TMEM9	3.11575e-10	0.195957	0.19	0.216	5.63141e-06
CCNI	3.14798e-10	0.254984	0.527	0.536	5.68965e-06
ARHGAP33	3.17628e-10	-0.141428	0.107	0.157	5.74081e-06
DCAF16	3.207e-10	0.129594	0.177	0.212	5.79633e-06
ANXA2	3.21326e-10	2.168	0.034	0.011	5.80765e-06
NUDT21	3.29118e-10	0.174882	0.207	0.242	5.94848e-06
CEP57	3.29607e-10	0.100299	0.115	0.146	5.95732e-06
PCBP2	3.30098e-10	0.259581	0.134	0.161	5.96619e-06
CBX5	3.30975e-10	-0.207305	0.185	0.261	5.98205e-06
SELENOK	3.37649e-10	0.280129	0.069	0.09	6.10267e-06
GLUL	3.42932e-10	0.292182	0.115	0.135	6.19816e-06
KCNK10	3.4536e-10	-0.740011	0.025	0.066	6.24203e-06
RAB3GAP2	3.4907e-10	0.251529	0.106	0.127	6.3091e-06
PHF2	3.61081e-10	-0.119957	0.071	0.113	6.52618e-06
DPYD	3.62247e-10	-0.489567	0.056	0.114	6.54725e-06
CDK5RAP3	3.63813e-10	0.28318	0.215	0.233	6.57555e-06
API5	3.68717e-10	0.10143	0.19	0.227	6.6642e-06
GABBR1	3.71508e-10	0.11808	0.215	0.253	6.71464e-06
TTC28	3.73896e-10	0.259183	0.097	0.124	6.75779e-06
EPM2AIP1	3.90032e-10	-0.150564	0.144	0.203	7.04945e-06
AHCYL1	3.96328e-10	0.13401	0.109	0.141	7.16323e-06
CWC27	3.96621e-10	0.561421	0.089	0.091	7.16853e-06
MAST1	4.17448e-10	-0.590008	0.089	0.165	7.54496e-06
TMEM50A	4.18724e-10	0.190401	0.169	0.2	7.56801e-06
HES4	4.26545e-10	0.460435	0.152	0.145	7.70938e-06
LBH	4.3344e-10	-0.234396	0.125	0.184	7.834e-06
CKAP5	4.438e-10	-0.225622	0.132	0.19	8.02124e-06
PLEKHA5	4.44072e-10	-0.322194	0.129	0.199	8.02615e-06
RABGGTB	4.47614e-10	0.148063	0.125	0.151	8.09017e-06
KIF3C	4.59558e-10	-0.353662	0.13	0.204	8.30606e-06
CLGN	4.60309e-10	0.475396	0.049	0.057	8.31962e-06
EGLN1	4.62443e-10	-0.268503	0.109	0.167	8.3582e-06
REV3L	4.75776e-10	-0.508099	0.07	0.124	8.59917e-06
CD46	4.79089e-10	0.282496	0.129	0.147	8.65906e-06
TRAPPC9	4.80426e-10	-0.21763	0.087	0.137	8.68322e-06
PFDN5	5.01358e-10	0.168309	0.156	0.188	9.06154e-06
PBX1	5.06385e-10	0.642354	0.136	0.121	9.1524e-06
CWC15	5.13264e-10	0.131113	0.133	0.162	9.27673e-06
HNRNPD	5.16313e-10	0.223082	0.286	0.308	9.33183e-06
GPRIN1	5.22755e-10	-0.71185	0.065	0.129	9.44828e-06
ZYX	5.2592e-10	0.139304	0.11	0.139	9.50548e-06
TFRC	5.28434e-10	0.362455	0.143	0.156	9.55091e-06
LCORL	5.33357e-10	-0.257116	0.07	0.118	9.63989e-06
MAB21L1	5.34439e-10	3.25234	0.015	0.002	9.65945e-06
CDIPT	5.36831e-10	0.119043	0.098	0.131	9.70269e-06
CERS6	5.47531e-10	-0.132287	0.11	0.162	9.89608e-06
GPAA1	5.60762e-10	0.209267	0.12	0.15	1.01352e-05
THRAP3	5.74366e-10	0.394783	0.168	0.164	1.03811e-05
DYNC1LI2	5.75275e-10	0.11406	0.324	0.376	1.03975e-05
ROBO1	5.78724e-10	0.149675	0.184	0.213	1.04598e-05
RNF165	5.7928e-10	-0.137438	0.166	0.231	1.04699e-05
RNF141	5.93855e-10	0.130653	0.106	0.142	1.07333e-05
ZSCAN2	5.99272e-10	-0.370769	0.076	0.128	1.08312e-05
HMGCR	6.00379e-10	-0.139492	0.218	0.294	1.08513e-05
ADGRG1	6.0459e-10	-0.573095	0.16	0.27	1.09274e-05
SLC29A4	6.08048e-10	-0.273071	0.069	0.121	1.09899e-05
EIF4G2	6.22648e-10	-0.328725	0.127	0.2	1.12537e-05
NCDN	6.26874e-10	0.23237	0.104	0.124	1.13301e-05
TMEM33	6.37815e-10	0.154943	0.18	0.221	1.15279e-05
BSN	6.38481e-10	-0.288102	0.064	0.107	1.15399e-05
NME4	6.38493e-10	-0.116306	0.076	0.12	1.15401e-05
NSD2	6.45696e-10	0.498178	0.1	0.108	1.16703e-05
USP22	6.49129e-10	-0.104981	0.236	0.309	1.17324e-05
SEMA6B	6.56238e-10	-0.203519	0.086	0.133	1.18608e-05
TCEA2	6.60775e-10	0.229624	0.13	0.152	1.19428e-05
TOX4	6.62512e-10	0.284911	0.151	0.171	1.19742e-05
ZIC2	6.67023e-10	1.88274	0.038	0.014	1.20558e-05
TUBB	6.73323e-10	0.14881	0.18	0.222	1.21696e-05
CDC34	6.81575e-10	0.129656	0.122	0.157	1.23188e-05
LCOR	6.92099e-10	-0.278207	0.197	0.281	1.2509e-05
ATF4	6.95345e-10	0.223101	0.217	0.237	1.25677e-05
ANKRD10	7.00385e-10	0.103073	0.232	0.277	1.26588e-05
ZSWIM5	7.02705e-10	-0.420265	0.063	0.115	1.27007e-05
BEX1	7.04377e-10	-0.208555	0.28	0.367	1.27309e-05
MTF2	7.15639e-10	-0.324096	0.078	0.132	1.29345e-05
GRIN2B	7.18078e-10	-0.387671	0.076	0.12	1.29785e-05
SNAP91	7.21533e-10	-0.339809	0.081	0.132	1.3041e-05
CCPG1	7.27445e-10	0.194198	0.125	0.151	1.31478e-05
DDX17	7.34684e-10	0.12279	0.151	0.189	1.32787e-05
CDO1	7.42818e-10	0.251644	0.111	0.132	1.34257e-05
PTPRO	7.44882e-10	-0.57478	0.077	0.139	1.3463e-05
LDOC1	7.76294e-10	-0.140847	0.116	0.172	1.40307e-05
RAB14	8.02015e-10	-0.208012	0.178	0.259	1.44956e-05
PEA15	8.14667e-10	-0.144992	0.224	0.301	1.47243e-05
SYP	8.1733e-10	-0.228735	0.131	0.198	1.47724e-05
BIRC6	8.31041e-10	0.179528	0.193	0.225	1.50202e-05
SLC23A2	8.35978e-10	-0.315378	0.077	0.124	1.51095e-05
TSPYL1	8.37261e-10	-0.153442	0.12	0.176	1.51327e-05
STXBP6	8.41667e-10	-2.2362	0.003	0.026	1.52123e-05
CLPTM1L	8.44835e-10	0.422289	0.095	0.105	1.52695e-05
ZRANB1	8.44862e-10	0.428999	0.176	0.177	1.527e-05
MAGEH1	8.55744e-10	-0.185734	0.287	0.373	1.54667e-05
ARGLU1	8.93071e-10	-0.169158	0.127	0.185	1.61414e-05
PREPL	8.93441e-10	0.229808	0.36	0.382	1.61481e-05
RNF38	8.95458e-10	0.196709	0.17	0.197	1.61845e-05
VPS53	9.04243e-10	0.241502	0.162	0.189	1.63433e-05
GOT2	9.05936e-10	0.488353	0.132	0.132	1.63739e-05
EHBP1	9.08973e-10	0.108719	0.135	0.171	1.64288e-05
CUL3	9.09414e-10	0.322961	0.183	0.195	1.64367e-05
LASP1	9.23493e-10	-0.246972	0.092	0.15	1.66912e-05
H1FX	9.38728e-10	-0.214594	0.178	0.255	1.69666e-05
EGLN2	9.43588e-10	-0.243236	0.079	0.128	1.70544e-05
ZSCAN18	9.44557e-10	-0.133275	0.176	0.232	1.70719e-05
ACBD6	9.51221e-10	0.174646	0.137	0.171	1.71924e-05
INAFM1	9.52338e-10	0.702951	0.089	0.078	1.72126e-05
NAV1	9.52821e-10	-0.348606	0.13	0.202	1.72213e-05
CNIH1	9.82484e-10	0.109146	0.116	0.143	1.77574e-05
FAT3	9.83431e-10	-0.52632	0.066	0.12	1.77745e-05
IRF2BP2	9.8516e-10	0.248545	0.12	0.136	1.78058e-05
SERF2	9.88902e-10	0.347151	0.192	0.201	1.78734e-05
SH3GLB1	9.98642e-10	-0.110608	0.138	0.187	1.80495e-05
NOP56	9.98937e-10	0.247443	0.161	0.185	1.80548e-05
TSC2	1.00002e-09	-0.259161	0.066	0.111	1.80744e-05
FKBP8	1.0917e-09	0.137046	0.118	0.147	1.97315e-05
GRB2	1.10569e-09	-0.365764	0.071	0.12	1.99843e-05
SPARC	1.1122e-09	-0.435724	0.107	0.182	2.01019e-05
CRABP2	1.12463e-09	-0.67435	0.076	0.135	2.03266e-05
RAB12	1.12852e-09	-0.225575	0.13	0.195	2.03969e-05
CAMK2B	1.13736e-09	-0.17013	0.058	0.095	2.05567e-05
LRPAP1	1.14019e-09	0.22627	0.118	0.139	2.06078e-05
PAX6	1.14198e-09	2.58749	0.027	0.006	2.06402e-05
2024-03-04	1.14432e-09	-0.723081	0.041	0.09	2.06825e-05
PKM	1.16481e-09	0.350489	0.216	0.226	2.10528e-05
PCGF2	1.18851e-09	-0.144904	0.153	0.22	2.14812e-05
NALCN	1.21312e-09	-0.358634	0.059	0.107	2.1926e-05
VPS26B	1.23617e-09	-0.348059	0.125	0.199	2.23425e-05
RASAL2	1.24067e-09	-0.750648	0.074	0.138	2.24238e-05
TSHZ2	1.24496e-09	-0.27931	0.07	0.119	2.25015e-05
SCN3A	1.25899e-09	-0.143687	0.129	0.186	2.2755e-05
GRINA	1.25906e-09	0.172652	0.2	0.231	2.27563e-05
SLIT1	1.28642e-09	-0.260702	0.127	0.19	2.32507e-05
IARS	1.29459e-09	0.461214	0.113	0.112	2.33984e-05
NKAIN1	1.29653e-09	-0.278836	0.079	0.134	2.34335e-05
MTSS1	1.29706e-09	-0.286273	0.092	0.146	2.3443e-05
OCIAD1	1.29834e-09	0.182644	0.298	0.33	2.34663e-05
MAPK1IP1L	1.31167e-09	0.101476	0.131	0.161	2.37071e-05
RO60	1.31771e-09	0.142719	0.226	0.269	2.38164e-05
ACVR2B	1.32043e-09	-0.195463	0.155	0.221	2.38655e-05
DDX46	1.3258e-09	0.293982	0.133	0.152	2.39625e-05
PPP1R15B	1.34592e-09	0.219706	0.15	0.165	2.43261e-05
RHOBTB2	1.35594e-09	0.395597	0.081	0.094	2.45072e-05
UAP1	1.37092e-09	0.646619	0.125	0.108	2.47781e-05
GORASP2	1.3878e-09	0.140725	0.126	0.154	2.50831e-05
NYAP1	1.39018e-09	-0.247544	0.106	0.165	2.51261e-05
WASL	1.41601e-09	-0.205947	0.077	0.12	2.55929e-05
BABAM1	1.43793e-09	0.370176	0.11	0.124	2.59892e-05
MDM2	1.47816e-09	0.273699	0.171	0.193	2.67163e-05
DHX15	1.48832e-09	0.15441	0.198	0.241	2.69e-05
ZSWIM8	1.51125e-09	0.132299	0.152	0.186	2.73144e-05
UBE2K	1.51722e-09	0.139254	0.081	0.106	2.74223e-05
RPRD2	1.52629e-09	0.187432	0.1	0.125	2.75862e-05
COPB1	1.55547e-09	0.296157	0.246	0.259	2.81136e-05
PNN	1.56378e-09	0.153872	0.115	0.148	2.82638e-05
C14orf132	1.59709e-09	-0.215502	0.125	0.189	2.88658e-05
SRP9	1.62277e-09	0.129676	0.195	0.234	2.93299e-05
CASC3	1.62334e-09	0.251548	0.202	0.224	2.93403e-05
ABCB8	1.65183e-09	0.458635	0.105	0.108	2.98551e-05
CTDNEP1	1.65919e-09	-0.153854	0.095	0.142	2.99883e-05
FARSB	1.66009e-09	-0.146779	0.147	0.211	3.00044e-05
KDM3A	1.6755e-09	0.115547	0.176	0.217	3.0283e-05
PRRC2B	1.67866e-09	-0.280152	0.173	0.251	3.03401e-05
YIPF3	1.68877e-09	0.266512	0.18	0.206	3.05228e-05
UFM1	1.69507e-09	0.100253	0.184	0.223	3.06366e-05
SORBS2	1.69583e-09	-0.239405	0.072	0.124	3.06504e-05
MST1	1.69928e-09	-0.944158	0.023	0.059	3.07128e-05
NPLOC4	1.69937e-09	0.139309	0.108	0.133	3.07144e-05
TMEM47	1.70604e-09	-0.782985	0.031	0.076	3.08349e-05
CPNE1	1.70878e-09	0.102988	0.133	0.171	3.08844e-05
FOXK1	1.74735e-09	0.252974	0.114	0.135	3.15817e-05
ID4	1.75526e-09	0.490831	0.292	0.261	3.17247e-05
HES5	1.7782e-09	0.280251	0.189	0.202	3.21393e-05
DHX30	1.8206e-09	-0.220646	0.1	0.153	3.29054e-05
TARBP1	1.83008e-09	0.213662	0.125	0.149	3.30768e-05
TCTEX1D2	1.84464e-09	0.315815	0.114	0.126	3.334e-05
SLC35E1	1.84982e-09	0.274224	0.113	0.134	3.34337e-05
PANX1	1.85425e-09	-0.205902	0.099	0.152	3.35137e-05
UPF3A	1.85477e-09	-0.199267	0.061	0.1	3.35231e-05
PJA2	1.87768e-09	0.179037	0.513	0.543	3.39372e-05
NHLRC2	1.87788e-09	0.221194	0.08	0.108	3.39408e-05
TACC2	1.88217e-09	-0.275991	0.071	0.12	3.40184e-05
CRIP2	1.88428e-09	-0.291827	0.094	0.154	3.40564e-05
FAM222A	1.88613e-09	-0.668432	0.061	0.12	3.409e-05
ARFRP1	1.92511e-09	0.130253	0.06	0.081	3.47945e-05
RNH1	1.94106e-09	0.295713	0.12	0.138	3.50826e-05
SHISA5	2.03166e-09	0.3491	0.163	0.176	3.67201e-05
TSC22D1	2.07567e-09	-0.324781	0.17	0.244	3.75157e-05
CNTN1	2.07954e-09	-0.357386	0.168	0.247	3.75857e-05
BUD23	2.0848e-09	0.112965	0.094	0.125	3.76807e-05
TNKS2	2.08621e-09	0.291566	0.171	0.187	3.77061e-05
SLC6A8	2.10998e-09	0.388338	0.164	0.168	3.81358e-05
CEP63	2.16292e-09	0.3507	0.079	0.094	3.90926e-05
PHGDH	2.17778e-09	0.334157	0.142	0.151	3.93612e-05
NDUFV2	2.19408e-09	0.110635	0.182	0.219	3.96558e-05
HIGD2A	2.1991e-09	0.329354	0.116	0.131	3.97466e-05
DVL3	2.21309e-09	0.214493	0.185	0.211	3.99995e-05
GPI	2.25624e-09	0.284602	0.096	0.119	4.07792e-05
FRZB	2.25657e-09	-0.862708	0.017	0.049	4.07852e-05
SSRP1	2.26471e-09	0.265739	0.151	0.173	4.09324e-05
SLAIN2	2.31135e-09	-0.131829	0.137	0.196	4.17753e-05
CASTOR2	2.3171e-09	-0.202223	0.111	0.164	4.18793e-05
DIS3	2.36687e-09	0.176582	0.148	0.17	4.27789e-05
ATP6V1G2	2.37502e-09	-0.41229	0.117	0.189	4.29261e-05
ITM2B	2.45071e-09	-0.300561	0.11	0.169	4.42941e-05
TAGLN3	2.46496e-09	-0.247956	0.136	0.203	4.45517e-05
MAST2	2.53439e-09	0.415583	0.09	0.101	4.58066e-05
IARS2	2.53804e-09	0.59077	0.063	0.064	4.58725e-05
CNOT6	2.611e-09	0.310691	0.116	0.127	4.71913e-05
SLC44A2	2.67015e-09	0.179127	0.178	0.197	4.82603e-05
PLTP	2.73016e-09	0.676749	0.105	0.09	4.9345e-05
XRN1	2.76784e-09	0.117718	0.078	0.104	5.00259e-05
DPF1	2.78172e-09	-0.564536	0.075	0.133	5.02768e-05
KIFAP3	2.82529e-09	-0.110737	0.156	0.213	5.10644e-05
ZFAND3	2.8427e-09	-0.174343	0.142	0.201	5.13789e-05
UBL5	2.84534e-09	0.129161	0.183	0.218	5.14267e-05
CD81	2.85911e-09	0.226092	0.048	0.063	5.16756e-05
TMX2	2.86104e-09	0.171413	0.201	0.23	5.17104e-05
PRMT2	2.90053e-09	-0.149741	0.126	0.189	5.24241e-05
SNRNP200	2.91593e-09	0.2227	0.214	0.241	5.27025e-05
POLR2G	2.91831e-09	0.291093	0.127	0.149	5.27456e-05
CNTNAP2	2.95558e-09	0.152915	0.163	0.185	5.34191e-05
ATP5MC2	2.96436e-09	-0.176052	0.111	0.168	5.35778e-05
KIF5B	2.99259e-09	0.188251	0.239	0.278	5.4088e-05
STX7	3.04534e-09	-0.109254	0.133	0.183	5.50416e-05
HMGCLL1	3.15777e-09	-0.347748	0.062	0.106	5.70736e-05
SHISAL1	3.2242e-09	-0.98806	0.018	0.056	5.82741e-05
PHF3	3.22529e-09	-0.236795	0.051	0.09	5.82939e-05
DMWD	3.25942e-09	0.14834	0.174	0.213	5.89107e-05
ABHD17B	3.26087e-09	-0.681119	0.046	0.095	5.89369e-05
ZDHHC21	3.32246e-09	-0.137506	0.09	0.137	6.00502e-05
HNRNPA3	3.32717e-09	0.161	0.165	0.195	6.01353e-05
MDM4	3.33102e-09	0.142663	0.25	0.29	6.02049e-05
POLR2B	3.34392e-09	0.103345	0.134	0.169	6.0438e-05
MCCC1	3.36497e-09	-0.112213	0.035	0.062	6.08185e-05
NKTR	3.39196e-09	0.568463	0.125	0.119	6.13063e-05
TMEM248	3.43068e-09	0.273149	0.096	0.112	6.20061e-05
YWHAH	3.45045e-09	-0.294047	0.09	0.142	6.23635e-05
SECISBP2L	3.47897e-09	0.121694	0.115	0.145	6.28789e-05
AKT3	3.4859e-09	0.139271	0.234	0.277	6.30042e-05
FBXO11	3.50041e-09	0.112642	0.138	0.169	6.32664e-05
DSEL	3.51314e-09	1.60927	0.051	0.021	6.34966e-05
SOX1	3.52151e-09	0.761173	0.104	0.083	6.36477e-05
SCRN3	3.5293e-09	0.287798	0.082	0.103	6.37885e-05
GNG10	3.5375e-09	-0.557683	0.036	0.072	6.39368e-05
MCRIP1	3.55164e-09	-0.113605	0.166	0.225	6.41924e-05
HS2ST1	3.56276e-09	0.350532	0.092	0.109	6.43933e-05
VAPA	3.60282e-09	0.428542	0.128	0.135	6.51173e-05
DCTN6	3.70142e-09	-0.141237	0.086	0.125	6.68995e-05
IGFBP2	3.7221e-09	0.345888	0.465	0.451	6.72732e-05
TXNL1	3.74217e-09	0.201548	0.195	0.222	6.7636e-05
METTL15	3.75161e-09	0.608011	0.074	0.071	6.78066e-05
DIRAS1	3.7793e-09	-0.25922	0.047	0.086	6.8307e-05
TM9SF3	3.8011e-09	0.107355	0.258	0.297	6.87011e-05
PPP3CB	3.80879e-09	-0.169746	0.207	0.277	6.88402e-05
NEO1	3.83296e-09	0.241286	0.127	0.151	6.92769e-05
ZNF512	3.87785e-09	0.362757	0.182	0.188	7.00882e-05
TMEM132A	3.9481e-09	-0.689989	0.077	0.153	7.1358e-05
BTBD1	4.01068e-09	-0.145424	0.121	0.174	7.24891e-05
ASB8	4.13038e-09	0.122096	0.082	0.113	7.46526e-05
CNPY2	4.15092e-09	0.272762	0.131	0.154	7.50236e-05
GSTA4	4.15177e-09	-0.156857	0.081	0.126	7.50392e-05
RSBN1	4.15883e-09	0.177231	0.125	0.152	7.51666e-05
PBX3	4.17611e-09	0.350609	0.19	0.196	7.5479e-05
GARS	4.18207e-09	0.264566	0.097	0.112	7.55868e-05
ATP6AP2	4.25336e-09	-0.279395	0.075	0.127	7.68752e-05
NTRK1	4.27532e-09	-0.530553	0.026	0.06	7.72721e-05
GPC2	4.27613e-09	0.14334	0.284	0.314	7.72868e-05
BUB3	4.31624e-09	-0.307383	0.066	0.116	7.80118e-05
MTSS2	4.34779e-09	-0.242539	0.109	0.162	7.85819e-05
CLASP1	4.35398e-09	0.109739	0.135	0.168	7.86939e-05
PCNX4	4.38004e-09	0.256295	0.107	0.126	7.91648e-05
CASTOR3	4.41964e-09	-0.263964	0.093	0.148	7.98806e-05
CTTN	4.48738e-09	0.142319	0.187	0.216	8.11048e-05
WDR13	4.56765e-09	0.205482	0.147	0.169	8.25557e-05
RPRD1A	4.59173e-09	0.143176	0.205	0.245	8.29909e-05
DEGS1	4.61597e-09	0.232396	0.121	0.134	8.3429e-05
NBR1	4.64255e-09	0.190959	0.077	0.103	8.39094e-05
RNF24	4.67512e-09	-0.315085	0.095	0.148	8.44982e-05
PWWP3A	4.6807e-09	-0.244465	0.101	0.147	8.45989e-05
C6orf62	4.69379e-09	0.180975	0.11	0.133	8.48355e-05
MGAT4B	4.71698e-09	0.244606	0.096	0.123	8.52546e-05
APH1A	4.72268e-09	0.384495	0.159	0.169	8.53577e-05
PPP2R5B	4.7249e-09	0.211865	0.168	0.198	8.53979e-05
SLITRK6	4.73179e-09	1.53232	0.035	0.015	8.55224e-05
ATP2B4	4.75192e-09	0.798184	0.101	0.087	8.58862e-05
MPHOSPH8	4.79432e-09	0.179366	0.062	0.084	8.66526e-05
NOL4L	4.80071e-09	-0.10938	0.127	0.182	8.6768e-05
KIFC2	4.81612e-09	0.262801	0.116	0.129	8.70466e-05
PLXNA1	4.83268e-09	-0.454642	0.095	0.171	8.73458e-05
GALNTL6	4.83766e-09	-1.05167	0.028	0.079	8.74358e-05
TMEM263	4.84762e-09	0.212526	0.161	0.191	8.76159e-05
AAAS	5.019e-09	0.269084	0.135	0.153	9.07134e-05
LBR	5.08768e-09	0.274693	0.135	0.151	9.19547e-05
OS9	5.13852e-09	-0.130371	0.142	0.201	9.28736e-05
C8orf33	5.23027e-09	0.191467	0.136	0.162	9.45319e-05
ZCCHC7	5.25294e-09	-0.223022	0.079	0.123	9.49417e-05
SEZ6	5.25411e-09	-0.356824	0.062	0.117	9.49629e-05
TUBGCP6	5.27175e-09	0.24677	0.114	0.138	9.52816e-05
ENDOV	5.3999e-09	0.317896	0.093	0.108	9.75977e-05
LRRTM4	5.4673e-09	0.240131	0.096	0.113	9.88161e-05
ZNF25	5.47427e-09	-0.328022	0.08	0.131	9.8942e-05
NUCB1	5.49278e-09	0.175941	0.127	0.149	9.92766e-05
RASGRF2	5.5814e-09	-2.4522	0.003	0.025	0.000100878
CCT4	5.59715e-09	0.169275	0.093	0.114	0.000101163
RPAP3	5.62917e-09	-0.128442	0.059	0.095	0.000101742
AGPAT1	5.63592e-09	-0.10731	0.169	0.231	0.000101864
DNM3	5.65816e-09	-0.148928	0.141	0.19	0.000102266
NSMCE1	5.66322e-09	0.914531	0.057	0.051	0.000102357
TSTD2	5.68261e-09	0.378344	0.102	0.112	0.000102707
HIST1H4C	5.72081e-09	-0.472375	0.063	0.122	0.000103398
KMT2D	5.72736e-09	-0.192914	0.083	0.131	0.000103516
RTN4	5.75799e-09	0.197474	0.263	0.288	0.00010407
ZMIZ1	5.90271e-09	0.29681	0.263	0.269	0.000106686
CTSB	5.97211e-09	0.22361	0.135	0.155	0.00010794
RAC1	6.02012e-09	-0.243374	0.139	0.203	0.000108808
OTX2	6.16664e-09	-0.379544	0.085	0.147	0.000111456
TPD52L2	6.28992e-09	0.121174	0.157	0.186	0.000113684
SRSF8	6.36116e-09	-0.211925	0.085	0.134	0.000114972
GPC1	6.47412e-09	-0.167207	0.173	0.232	0.000117013
CNOT9	6.60204e-09	0.205549	0.17	0.19	0.000119325
MYT1	6.66041e-09	0.255788	0.112	0.136	0.00012038
SYT13	6.67699e-09	0.204655	0.153	0.182	0.00012068
DONSON	6.76156e-09	0.29105	0.076	0.087	0.000122208
ALKBH5	6.77932e-09	0.262382	0.181	0.203	0.000122529
USP3	6.8592e-09	-0.204042	0.07	0.113	0.000123973
2024-03-07	6.86233e-09	-0.234517	0.161	0.227	0.00012403
YES1	6.88775e-09	0.335581	0.084	0.096	0.000124489
PKIG	6.97465e-09	-0.445041	0.061	0.108	0.00012606
TRAK1	7.03386e-09	-0.219635	0.1	0.151	0.00012713
COX6A1	7.08165e-09	-0.187019	0.152	0.208	0.000127994
BCCIP	7.29288e-09	0.394961	0.121	0.131	0.000131811
TAF7	7.31506e-09	0.135411	0.213	0.254	0.000132212
GRIPAP1	7.33477e-09	-0.151194	0.115	0.159	0.000132569
RADX	7.43745e-09	-0.742414	0.044	0.098	0.000134424
RNF182	7.44816e-09	-1.57294	0.011	0.045	0.000134618
PRDM4	7.47606e-09	0.683914	0.112	0.102	0.000135122
CTNNA1	7.53106e-09	0.673369	0.1	0.087	0.000136116
AGO3	7.62429e-09	0.133567	0.093	0.119	0.000137801
CALB2	7.65414e-09	-1.24498	0.018	0.064	0.000138341
TNFRSF10B	7.65514e-09	0.377631	0.145	0.143	0.000138359
TRAPPC4	7.71325e-09	-0.135183	0.147	0.208	0.000139409
RCAN3	7.7312e-09	-0.240271	0.07	0.11	0.000139734
PLD3	7.83829e-09	-0.152329	0.156	0.228	0.000141669
TM9SF2	7.86811e-09	-0.127338	0.166	0.235	0.000142208
PCMT1	7.87853e-09	-0.193454	0.139	0.196	0.000142397
SALL1	7.91517e-09	1.96035	0.035	0.011	0.000143059
STX16	7.98731e-09	-0.239521	0.175	0.247	0.000144363
FAM169A	8.03454e-09	0.193541	0.082	0.104	0.000145216
NME2	8.14091e-09	0.265633	0.096	0.11	0.000147139
LRCH2	8.21986e-09	-0.462703	0.075	0.127	0.000148566
MED13L	8.34284e-09	-0.478957	0.085	0.141	0.000150789
ZNF697	8.34816e-09	-0.150516	0.084	0.128	0.000150885
COPG2	8.3835e-09	0.164212	0.127	0.15	0.000151523
GPR162	8.80876e-09	0.360624	0.081	0.098	0.00015921
SMDT1	8.82067e-09	-0.211562	0.11	0.162	0.000159425
RBM18	8.98219e-09	-0.421953	0.082	0.14	0.000162344
BICRAL	9.26764e-09	0.338109	0.069	0.085	0.000167503
PTN	9.26943e-09	0.221888	0.175	0.198	0.000167536
STRBP	9.32181e-09	-0.38057	0.087	0.149	0.000168482
IDS	9.3959e-09	-0.14545	0.185	0.258	0.000169822
GATAD2B	9.43018e-09	0.102267	0.183	0.225	0.000170441
CDC16	9.45286e-09	0.220623	0.146	0.173	0.000170851
MEGF8	9.72455e-09	0.14437	0.095	0.12	0.000175762
HID1	9.76232e-09	-0.566655	0.048	0.095	0.000176444
KPNA1	9.92867e-09	0.170612	0.167	0.195	0.000179451
HOOK3	1.01102e-08	-0.191756	0.088	0.136	0.000182732
CYB5R3	1.02836e-08	-0.256896	0.132	0.195	0.000185866
CPEB4	1.05929e-08	-0.186149	0.161	0.228	0.000191456
ATP6V0C	1.06496e-08	-0.219244	0.147	0.212	0.00019248
APOE	1.06945e-08	0.946307	0.068	0.046	0.000193293
HTATSF1	1.07102e-08	-0.668546	0.073	0.147	0.000193577
KIF3A	1.08132e-08	-0.347755	0.116	0.186	0.000195437
PNRC1	1.08989e-08	-0.303907	0.151	0.225	0.000196987
EMX2	1.0912e-08	2.34386	0.023	0.005	0.000197223
AP1G1	1.09866e-08	-0.115521	0.094	0.139	0.000198572
GABRA1	1.10011e-08	-0.42028	0.036	0.066	0.000198833
TRAFD1	1.10095e-08	0.166402	0.076	0.096	0.000198985
SYNGR3	1.14417e-08	-0.218066	0.098	0.145	0.000206798
SEC61B	1.17554e-08	0.25435	0.119	0.136	0.000212467
NUP153	1.18049e-08	0.264232	0.145	0.156	0.000213361
CHCHD2	1.18671e-08	0.123359	0.127	0.16	0.000214486
SHF	1.23355e-08	-0.736086	0.06	0.123	0.000222952
TRO	1.23749e-08	-0.228372	0.115	0.173	0.000223664
RAB13	1.24172e-08	1.1684	0.069	0.044	0.000224428
CEBPG	1.24231e-08	0.218707	0.123	0.145	0.000224536
EIF2S1	1.26298e-08	0.335779	0.144	0.151	0.00022827
NDUFC1	1.27348e-08	0.268959	0.125	0.139	0.000230168
ALMS1	1.27607e-08	0.194791	0.127	0.153	0.000230637
FAM171B	1.28615e-08	0.131486	0.151	0.183	0.000232458
MYO16	1.31236e-08	-0.447047	0.051	0.095	0.000237195
BCAP31	1.32365e-08	0.176298	0.088	0.111	0.000239237
NOL4	1.33804e-08	-0.319998	0.065	0.111	0.000241838
ZNF414	1.34977e-08	0.413333	0.074	0.083	0.000243957
NAT8L	1.35749e-08	-0.277836	0.083	0.135	0.000245354
LOX	1.36214e-08	-0.724338	0.014	0.045	0.000246193
IMPAD1	1.36257e-08	-0.191184	0.114	0.172	0.00024627
DNM1	1.3927e-08	-0.237895	0.149	0.217	0.000251717
NAA15	1.40767e-08	0.451408	0.11	0.12	0.000254423
DNMT1	1.41664e-08	0.394817	0.1	0.118	0.000256044
ANK3	1.41698e-08	-0.298313	0.174	0.258	0.000256104
GPS2	1.42175e-08	-0.438712	0.061	0.111	0.000256966
PLPP5	1.42524e-08	-0.465872	0.061	0.115	0.000257599
SMPD4	1.43309e-08	0.152977	0.088	0.112	0.000259017
LONP1	1.43318e-08	0.130058	0.116	0.143	0.000259034
ATP6V1D	1.43872e-08	0.165221	0.112	0.133	0.000260035
PLPP3	1.45123e-08	-0.850262	0.04	0.089	0.000262295
SURF1	1.50752e-08	0.328945	0.089	0.106	0.000272468
NRCAM	1.51723e-08	-0.173522	0.175	0.239	0.000274224
MAD2L2	1.52305e-08	-0.181366	0.101	0.15	0.000275275
CLIP1	1.52736e-08	0.106033	0.102	0.132	0.000276055
PPP4R3A	1.5365e-08	0.312733	0.118	0.133	0.000277708
RARS	1.5447e-08	0.368232	0.112	0.119	0.000279189
SYNE2	1.55349e-08	0.353666	0.159	0.167	0.000280777
TXN2	1.56425e-08	-0.103463	0.076	0.112	0.000282723
CHMP6	1.58316e-08	0.538603	0.075	0.077	0.00028614
LIFR	1.59065e-08	0.978765	0.07	0.044	0.000287494
DIS3L2	1.6375e-08	0.42788	0.104	0.109	0.000295962
TMEM179	1.64192e-08	-0.531831	0.032	0.073	0.00029676
GLI3	1.66105e-08	1.74731	0.042	0.017	0.000300219
PCGF3	1.68608e-08	-0.10339	0.126	0.172	0.000304743
ADGRL1	1.68729e-08	-0.64173	0.089	0.165	0.000304961
UQCRC1	1.69346e-08	-0.154397	0.15	0.212	0.000306075
C11orf58	1.71802e-08	0.173645	0.216	0.254	0.000310515
SEMA3C	1.72557e-08	0.921001	0.077	0.053	0.000311879
PHF1	1.74446e-08	-0.152804	0.093	0.137	0.000315294
REEP5	1.77164e-08	-0.290643	0.101	0.156	0.000320207
SNAP25	1.77342e-08	-0.200447	0.127	0.186	0.000320528
ARMCX2	1.77823e-08	0.157421	0.056	0.085	0.000321397
BRD3	1.78622e-08	-0.359399	0.093	0.154	0.000322841
TOMM5	1.79799e-08	0.152235	0.164	0.202	0.000324969
IGSF9B	1.80259e-08	-0.139312	0.059	0.095	0.0003258
LSM14B	1.82771e-08	0.210614	0.169	0.197	0.00033034
ZDHHC2	1.82847e-08	-0.556188	0.054	0.101	0.000330478
ISCU	1.83582e-08	0.17699	0.098	0.121	0.000331805
SIVA1	1.83755e-08	0.419509	0.142	0.141	0.000332119
CCNK	1.85715e-08	0.159453	0.145	0.17	0.000335662
CCDC14	1.87956e-08	-0.215744	0.099	0.144	0.000339711
STMN1	1.89675e-08	0.219265	0.154	0.178	0.000342819
HIST1H2AE	1.93042e-08	-0.252923	0.114	0.171	0.000348905
HM13	1.93906e-08	0.104424	0.153	0.181	0.000350466
SEC61A1	1.9566e-08	0.199418	0.245	0.263	0.000353636
TBKBP1	1.95685e-08	-0.191896	0.05	0.085	0.000353682
OTUB1	1.97403e-08	-0.296066	0.078	0.127	0.000356787
PHC3	1.97889e-08	0.135669	0.089	0.112	0.000357665
CLDN12	1.98073e-08	-0.128966	0.093	0.135	0.000357998
CHPF	1.98252e-08	0.426522	0.146	0.145	0.00035832
CHD4	2.04497e-08	0.233775	0.181	0.204	0.000369608
PPP1R7	2.0627e-08	0.188915	0.092	0.112	0.000372813
LIN7C	2.0697e-08	-0.150317	0.15	0.206	0.000374078
GABRB2	2.08606e-08	-0.252994	0.098	0.135	0.000377034
NOSIP	2.08998e-08	0.154181	0.051	0.07	0.000377744
ZC3H13	2.09561e-08	0.163053	0.126	0.15	0.000378761
FAM177A1	2.13046e-08	0.395337	0.078	0.091	0.000385059
GRIK2	2.15789e-08	0.179217	0.166	0.191	0.000390017
LHX2	2.18222e-08	1.71465	0.043	0.018	0.000394415
EHMT1	2.18715e-08	0.212968	0.158	0.18	0.000395305
AP3B2	2.19125e-08	-0.305861	0.102	0.153	0.000396047
PAGR1	2.19328e-08	0.334989	0.181	0.197	0.000396414
PRNP	2.19572e-08	-0.155715	0.125	0.177	0.000396855
TNRC6B	2.19683e-08	-0.158253	0.122	0.173	0.000397055
DHFR	2.22344e-08	0.393218	0.067	0.08	0.000401865
ASPHD1	2.24333e-08	-0.614773	0.053	0.103	0.000405459
GOLGA5	2.25418e-08	0.484896	0.083	0.087	0.00040742
KHSRP	2.27201e-08	0.303773	0.152	0.166	0.000410643
HSPA5	2.27635e-08	0.623299	0.139	0.121	0.000411427
SLC25A44	2.2786e-08	0.204945	0.085	0.101	0.000411834
DGUOK	2.37928e-08	0.218801	0.212	0.228	0.000430031
SLC2A13	2.38246e-08	-1.11437	0.038	0.088	0.000430606
SNX1	2.38462e-08	0.178036	0.107	0.127	0.000430996
EPN2	2.4235e-08	-0.105731	0.079	0.118	0.000438024
CMC2	2.43401e-08	0.243101	0.076	0.092	0.000439922
NAGK	2.45032e-08	0.113439	0.149	0.179	0.000442871
BRINP1	2.47323e-08	-0.998684	0.03	0.077	0.000447011
TRAF7	2.48087e-08	0.367983	0.089	0.096	0.000448393
FBXW2	2.5e-08	-0.195703	0.136	0.19	0.000451851
OAZ2	2.51421e-08	0.21213	0.241	0.274	0.000454418
SEM1	2.54485e-08	0.267487	0.086	0.101	0.000459956
VPS39	2.55285e-08	-0.133901	0.081	0.119	0.000461402
GNAI3	2.56313e-08	0.175573	0.165	0.192	0.000463261
TGOLN2	2.56653e-08	-0.157934	0.073	0.108	0.000463874
SF3A3	2.57048e-08	0.272285	0.094	0.115	0.000464589
RBM14	2.60697e-08	0.244551	0.099	0.116	0.000471184
DST	2.60928e-08	-0.199422	0.133	0.19	0.000471602
CCDC9	2.60992e-08	0.427184	0.085	0.091	0.000471717
CDC5L	2.632e-08	0.420488	0.132	0.135	0.000475708
DELE1	2.65089e-08	0.286425	0.107	0.119	0.000479121
CERS4	2.65091e-08	0.327591	0.085	0.096	0.000479126
DCAF8	2.69814e-08	0.199831	0.16	0.179	0.000487662
ELFN2	2.72599e-08	-1.02263	0.034	0.082	0.000492696
ARHGAP36	2.75019e-08	-7.58163	0	0.014	0.000497069
MAGI1	2.7621e-08	-0.195901	0.087	0.132	0.000499223
PHF14	2.78728e-08	-0.130034	0.129	0.185	0.000503773
MYO18A	2.788e-08	-0.278034	0.071	0.112	0.000503904
MORC3	2.84061e-08	-0.115578	0.102	0.143	0.000513411
GNPDA2	2.84556e-08	-0.159517	0.037	0.063	0.000514306
GNG4	2.85146e-08	0.398125	0.162	0.168	0.000515373
GFRA2	2.8528e-08	0.326411	0.034	0.045	0.000515615
NTN1	2.90875e-08	-0.633162	0.045	0.096	0.000525728
HSPA9	2.91124e-08	0.397274	0.129	0.133	0.000526177
PTPRF	2.93577e-08	-0.134779	0.113	0.163	0.000530611
UBE2I	2.98466e-08	0.153332	0.204	0.238	0.000539447
TMUB2	3.00259e-08	-0.128656	0.096	0.14	0.000542688
MIA3	3.02047e-08	0.102368	0.132	0.162	0.00054592
TOMM70	3.03882e-08	0.126231	0.109	0.131	0.000549236
ZNF664	3.07899e-08	0.129955	0.156	0.184	0.000556496
NDUFB5	3.08415e-08	0.327567	0.151	0.162	0.00055743
SFMBT2	3.13881e-08	-0.862153	0.033	0.08	0.000567308
RMND5A	3.17848e-08	0.187284	0.146	0.163	0.000574478
OSBPL8	3.21086e-08	-0.143683	0.12	0.162	0.000580331
PTDSS1	3.25175e-08	0.226158	0.076	0.096	0.000587722
RALGPS1	3.26949e-08	-0.276401	0.051	0.091	0.000590927
KHDC4	3.29292e-08	0.202752	0.145	0.166	0.000595162
POMGNT1	3.30683e-08	0.148699	0.078	0.105	0.000597676
COMMD6	3.31601e-08	0.375877	0.128	0.14	0.000599336
KLHDC3	3.34178e-08	-0.609301	0.055	0.111	0.000603993
ADPRHL2	3.34808e-08	-0.124348	0.069	0.101	0.000605131
RAPGEF6	3.37323e-08	-0.477399	0.086	0.138	0.000609678
SYAP1	3.38012e-08	0.263126	0.092	0.106	0.000610923
KPNA5	3.39472e-08	-0.368093	0.058	0.102	0.000613562
ZFR	3.40175e-08	-0.156764	0.142	0.195	0.000614832
TPRKB	3.41506e-08	0.307515	0.099	0.111	0.000617238
GNA11	3.47266e-08	-0.313293	0.042	0.08	0.000627649
C4orf3	3.52684e-08	0.15222	0.103	0.12	0.000637442
PA2G4	3.54903e-08	-0.214471	0.105	0.158	0.000641452
NPEPL1	3.56044e-08	-0.378	0.072	0.117	0.000643513
GOLM1	3.58213e-08	-0.322627	0.12	0.186	0.000647434
DYRK1B	3.59356e-08	-0.179855	0.064	0.102	0.000649499
MGAT4A	3.61024e-08	-0.611664	0.042	0.085	0.000652514
GOLGA2	3.61028e-08	0.207727	0.07	0.089	0.000652521
SLC6A15	3.6612e-08	0.191478	0.073	0.091	0.000661726
B3GALT2	3.66656e-08	-1.44932	0.019	0.059	0.000662693
SPPL3	3.68411e-08	0.121401	0.076	0.105	0.000665867
ATF2	3.75124e-08	-0.189888	0.179	0.26	0.000677998
MLH1	3.78599e-08	0.276669	0.093	0.11	0.00068428
MAP3K7	3.792e-08	0.18379	0.104	0.125	0.000685366
SFPQ	3.79471e-08	-0.14673	0.16	0.219	0.000685856
RNF149	3.81122e-08	0.232607	0.081	0.102	0.00068884
SNAPC3	3.81952e-08	-0.226962	0.129	0.183	0.00069034
UBQLN2	3.82251e-08	-0.155441	0.128	0.178	0.00069088
CEP95	3.82794e-08	0.215513	0.093	0.113	0.000691862
FGFR3	3.87143e-08	1.20105	0.026	0.017	0.000699722
YKT6	3.90617e-08	0.100556	0.28	0.314	0.000706001
DCTN4	3.91033e-08	0.227371	0.2	0.221	0.000706753
PRRC2C	3.94505e-08	-0.143918	0.161	0.217	0.000713029
RGS17	3.94685e-08	-0.575296	0.056	0.103	0.000713354
SIX3	3.95739e-08	0.631081	0.107	0.104	0.00071526
ARL1	3.96193e-08	0.499046	0.109	0.102	0.00071608
JAZF1	3.98867e-08	-1.36066	0.025	0.075	0.000720913
SF3B5	4.00511e-08	-0.240551	0.111	0.165	0.000723884
NCBP1	4.14189e-08	-0.473026	0.05	0.09	0.000748606
GAB2	4.16378e-08	0.122425	0.069	0.087	0.000752561
NTRK2	4.25229e-08	-0.110444	0.098	0.131	0.000768558
KLHDC10	4.25518e-08	-0.386839	0.129	0.209	0.000769081
EPHB2	4.2674e-08	-0.194597	0.078	0.125	0.00077129
CPT1C	4.3458e-08	-0.497048	0.02	0.047	0.00078546
ZNF148	4.38031e-08	0.220826	0.117	0.139	0.000791697
VASH2	4.38517e-08	0.100802	0.094	0.118	0.000792575
TAF10	4.41402e-08	0.203776	0.174	0.197	0.00079779
TOMM40	4.4275e-08	0.29938	0.11	0.117	0.000800226
BMPR2	4.50393e-08	-0.153408	0.118	0.168	0.00081404
IGFBPL1	4.51062e-08	0.332689	0.136	0.152	0.00081525
ACAP3	4.52135e-08	0.24359	0.179	0.199	0.00081719
GBX1	4.5628e-08	-0.236034	0.074	0.114	0.00082468
PSMC5	4.57353e-08	0.236736	0.126	0.141	0.000826621
PMPCB	4.60237e-08	0.223953	0.125	0.145	0.000831832
CDC73	4.63194e-08	0.146738	0.113	0.139	0.000837178
NCOR1	4.69309e-08	-0.110045	0.106	0.15	0.000848229
ELP1	4.755e-08	0.246077	0.095	0.116	0.000859419
PPIP5K2	4.77148e-08	0.134096	0.124	0.15	0.000862397
PDP1	4.80532e-08	-0.321074	0.049	0.087	0.000868514
CAB39	4.83074e-08	-0.211523	0.144	0.205	0.000873109
ABL1	4.85982e-08	-0.324099	0.093	0.146	0.000878363
GRK4	4.89952e-08	-0.234011	0.053	0.091	0.00088554
SLU7	4.90358e-08	0.381736	0.126	0.128	0.000886273
ACVR2A	4.91913e-08	0.147431	0.117	0.145	0.000889084
PSMA7	4.94552e-08	0.148069	0.122	0.145	0.000893853
XBP1	4.9601e-08	0.498217	0.086	0.091	0.000896488
GABARAPL2	4.97497e-08	-0.105346	0.106	0.15	0.000899176
GPAT4	4.98502e-08	-0.28549	0.037	0.066	0.000900993
B3GAT1	5.05362e-08	-0.128953	0.09	0.134	0.000913391
SPTSSA	5.17446e-08	0.224264	0.064	0.077	0.000935233
UQCC1	5.24827e-08	0.206201	0.073	0.091	0.000948572
COX7C	5.3275e-08	0.230062	0.231	0.26	0.000962893
TIMM10B	5.33184e-08	0.510117	0.12	0.118	0.000963677
UBE2Q1	5.34455e-08	-0.199107	0.102	0.152	0.000965974
PYGB	5.40683e-08	0.138827	0.18	0.208	0.000977231
SF3B2	5.44182e-08	0.13991	0.102	0.125	0.000983555
HNRNPH3	5.47038e-08	-0.342771	0.239	0.347	0.000988716
KLHL23	5.48292e-08	-0.111359	0.099	0.143	0.000990983
NCS1	5.48548e-08	-0.128945	0.128	0.175	0.000991445
CHD5	5.4962e-08	-0.483637	0.037	0.07	0.000993383
SH3BP4	5.51033e-08	-0.102662	0.049	0.074	0.000995937
CBFA2T3	5.51349e-08	-0.49336	0.044	0.087	0.000996508
ATP1B1	5.53484e-08	0.192683	0.122	0.139	0.00100037
TAOK2	5.54349e-08	-0.207936	0.119	0.169	0.00100193
PRR14L	5.569e-08	-0.271649	0.071	0.107	0.00100654
BLCAP	5.62266e-08	-0.141489	0.311	0.39	0.00101624
COPS5	5.65666e-08	-0.198225	0.057	0.09	0.00102238
ATAD1	5.73e-08	0.22332	0.219	0.245	0.00103564
GTF2H5	5.85186e-08	0.341928	0.096	0.1	0.00105766
UROS	5.88103e-08	0.160968	0.084	0.105	0.00106294
MFN2	5.95204e-08	0.325547	0.106	0.125	0.00107577
CXADR	5.97692e-08	-0.333403	0.119	0.176	0.00108027
DCK	6.03958e-08	0.246257	0.077	0.095	0.00109159
HCFC1R1	6.07281e-08	-0.229347	0.057	0.091	0.0010976
SPEN	6.08988e-08	-0.354723	0.072	0.121	0.00110069
NOL7	6.09589e-08	0.419681	0.078	0.09	0.00110177
PFKFB3	6.13251e-08	-0.270813	0.067	0.11	0.00110839
STAG1	6.13313e-08	0.340572	0.113	0.125	0.0011085
FAM126B	6.14187e-08	-0.40281	0.057	0.1	0.00111008
VLDLR	6.14249e-08	-0.121606	0.075	0.114	0.00111019
FARSA	6.18842e-08	0.123538	0.15	0.187	0.0011185
SUPT20H	6.23485e-08	-0.287189	0.095	0.148	0.00112689
CCNT2	6.2743e-08	0.127122	0.099	0.133	0.00113402
RNF138	6.29569e-08	0.267999	0.062	0.08	0.00113788
MAD2L1BP	6.35939e-08	-0.175484	0.03	0.053	0.0011494
FBXO7	6.35944e-08	0.270584	0.058	0.072	0.00114941
RETREG3	6.43127e-08	-0.279434	0.057	0.094	0.00116239
SURF4	6.4486e-08	0.25048	0.145	0.162	0.00116552
HILPDA	6.44999e-08	0.487978	0.059	0.064	0.00116577
SCRIB	6.49064e-08	0.358107	0.115	0.123	0.00117312
UBE2H	6.56202e-08	-0.160248	0.123	0.169	0.00118602
BSDC1	6.57892e-08	-0.148168	0.127	0.183	0.00118907
ROBO3	6.5908e-08	-0.134036	0.115	0.171	0.00119122
DHPS	6.61475e-08	0.247231	0.112	0.137	0.00119555
ZNF24	6.67579e-08	0.157239	0.129	0.157	0.00120658
TET2	6.75266e-08	0.118402	0.13	0.159	0.00122048
TTC19	6.80277e-08	0.214103	0.12	0.135	0.00122953
PPP2R2C	6.84983e-08	-0.374815	0.068	0.112	0.00123804
TPGS2	6.8757e-08	0.177674	0.203	0.223	0.00124271
GID8	6.91453e-08	0.257456	0.082	0.097	0.00124973
EBF4	6.92092e-08	-0.93355	0.033	0.076	0.00125089
AMFR	6.94044e-08	-0.317844	0.077	0.129	0.00125441
CCSAP	6.99227e-08	0.177191	0.095	0.118	0.00126378
SYT5	7.05137e-08	0.187053	0.145	0.173	0.00127446
MAP3K10	7.10458e-08	-0.15569	0.09	0.129	0.00128408
C1orf122	7.12861e-08	-0.124324	0.135	0.192	0.00128843
IKBKG	7.2758e-08	0.189593	0.032	0.052	0.00131503
UBE3C	7.28507e-08	0.157826	0.1	0.124	0.0013167
COPS3	7.30098e-08	0.115177	0.13	0.16	0.00131958
RAE1	7.35998e-08	-0.295299	0.07	0.112	0.00133024
KLC2	7.37815e-08	-0.250814	0.096	0.148	0.00133353
PRKAB1	7.39996e-08	0.344954	0.141	0.149	0.00133747
PURG	7.41379e-08	-0.119542	0.069	0.108	0.00133997
TMEM87B	7.42681e-08	0.262181	0.061	0.077	0.00134232
IBTK	7.43525e-08	-0.18408	0.053	0.09	0.00134385
NXPH1	7.43874e-08	-0.741951	0.04	0.078	0.00134448
PCIF1	7.46186e-08	-0.320378	0.052	0.087	0.00134866
MLST8	7.48243e-08	0.221467	0.093	0.108	0.00135237
TMEM175	7.65439e-08	-0.337467	0.076	0.121	0.00138345
CHD6	7.68607e-08	-0.287626	0.059	0.097	0.00138918
KIF26A	7.71985e-08	0.612707	0.042	0.044	0.00139529
UBXN2A	7.73249e-08	0.188905	0.078	0.096	0.00139757
LZIC	7.81186e-08	0.176641	0.105	0.128	0.00141192
EXOC5	7.8281e-08	-0.156792	0.134	0.191	0.00141485
CBR4	7.8289e-08	-0.120611	0.073	0.109	0.001415
PRPF19	7.89601e-08	0.180566	0.159	0.18	0.00142713
NABP2	7.91642e-08	0.219268	0.117	0.143	0.00143081
MAP2K2	7.94343e-08	0.198427	0.169	0.186	0.0014357
PSMD3	8.09103e-08	0.109005	0.193	0.227	0.00146237
PIGF	8.14624e-08	0.402732	0.094	0.099	0.00147235
BRD1	8.179e-08	0.212672	0.123	0.151	0.00147827
CHGA	8.33722e-08	-0.217762	0.113	0.166	0.00150687
RBMX	8.4377e-08	0.216635	0.102	0.123	0.00152503
LANCL2	8.50554e-08	-0.326785	0.055	0.094	0.00153729
MBD3	8.52245e-08	0.132019	0.076	0.096	0.00154035
ANP32A	8.57378e-08	-0.109934	0.059	0.088	0.00154962
MPP2	8.61287e-08	-0.19841	0.069	0.109	0.00155669
STC2	8.64722e-08	0.37664	0.04	0.048	0.0015629
YIF1A	8.69205e-08	0.141589	0.136	0.161	0.001571
ADAM22	8.72686e-08	-0.519708	0.055	0.104	0.00157729
ZMYND19	8.75952e-08	-0.312721	0.04	0.074	0.0015832
RABAC1	8.80222e-08	0.135908	0.236	0.265	0.00159091
MSL2	8.83903e-08	-0.145573	0.077	0.116	0.00159757
DMTN	8.85165e-08	-0.437507	0.065	0.108	0.00159985
PIN1	8.92861e-08	0.102977	0.115	0.143	0.00161376
LCMT1	8.95981e-08	0.228349	0.119	0.133	0.0016194
ATP6V0D1	8.99446e-08	-0.215177	0.136	0.193	0.00162566
SGCB	9.04635e-08	-0.255121	0.11	0.165	0.00163504
RCN2	9.10003e-08	0.154631	0.109	0.136	0.00164474
BBC3	9.24807e-08	0.155242	0.1	0.119	0.0016715
ZCCHC14	9.30065e-08	-0.231623	0.066	0.107	0.001681
ACTL6B	9.32929e-08	-0.634353	0.079	0.142	0.00168618
MNAT1	9.40433e-08	0.417907	0.09	0.093	0.00169974
DCAKD	9.43134e-08	0.165382	0.144	0.168	0.00170462
CFAP410	9.481e-08	0.200843	0.071	0.089	0.0017136
NDFIP1	9.51428e-08	-0.169119	0.281	0.365	0.00171961
TOR1AIP2	9.6541e-08	0.46165	0.068	0.075	0.00174488
C18orf32	9.66066e-08	-0.136597	0.133	0.186	0.00174607
MKLN1	9.6632e-08	0.235349	0.113	0.133	0.00174653
EPB41	9.69769e-08	0.138423	0.1	0.123	0.00175276
APEX1	9.78756e-08	-0.299825	0.166	0.235	0.001769
CEBPZOS	9.82244e-08	0.517965	0.074	0.078	0.00177531
BRD4	9.83831e-08	0.137243	0.183	0.207	0.00177818
ZNF407	9.95776e-08	0.757299	0.047	0.045	0.00179976
ZFAND1	1.00605e-07	-0.791417	0.028	0.069	0.00181834
CDK20	1.01643e-07	0.100028	0.114	0.145	0.0018371
ANK2	1.01711e-07	-0.357082	0.142	0.211	0.00183833
COX4I1	1.01974e-07	0.47997	0.13	0.127	0.00184308
ELP2	1.0208e-07	-0.283593	0.089	0.139	0.00184499
NDUFA7	1.02471e-07	0.217649	0.101	0.127	0.00185206
VMP1	1.02941e-07	0.108535	0.109	0.14	0.00186056
GAD2	1.03593e-07	1.29421	0.06	0.033	0.00187234
INPP5E	1.04815e-07	0.243835	0.069	0.08	0.00189442
RNF167	1.05893e-07	0.115416	0.135	0.161	0.00191391
TUBG1	1.06979e-07	-0.105971	0.052	0.082	0.00193353
IRS2	1.07728e-07	0.460765	0.091	0.085	0.00194708
MMD	1.0823e-07	-0.257723	0.077	0.126	0.00195616
ZDHHC20	1.08259e-07	0.271265	0.059	0.077	0.00195668
CCDC130	1.08584e-07	-0.369659	0.056	0.092	0.00196255
SETX	1.08755e-07	-0.360393	0.059	0.098	0.00196563
SSR2	1.08961e-07	0.13697	0.231	0.267	0.00196936
DICER1	1.10333e-07	-0.136235	0.152	0.203	0.00199415
TAF1A	1.10615e-07	0.610579	0.047	0.052	0.00199926
CTBP2	1.10808e-07	0.297371	0.115	0.136	0.00200274
TMEM251	1.12801e-07	0.366671	0.074	0.082	0.00203877
SH3GL1	1.1329e-07	-0.299729	0.078	0.128	0.00204761
GRIK5	1.14001e-07	0.245052	0.145	0.163	0.00206045
OXA1L	1.14178e-07	0.198974	0.101	0.118	0.00206366
SMAP2	1.14302e-07	-0.261036	0.101	0.151	0.0020659
LSM4	1.1562e-07	-0.107666	0.144	0.193	0.00208971
ACHE	1.15699e-07	0.453527	0.1	0.101	0.00209114
GALT	1.16868e-07	-0.13928	0.07	0.109	0.00211227
RGS2	1.17935e-07	0.182032	0.041	0.061	0.00213155
RRAGA	1.18457e-07	0.329189	0.117	0.126	0.002141
CNOT4	1.18507e-07	-0.217641	0.09	0.135	0.0021419
SVOP	1.19209e-07	-0.49996	0.053	0.095	0.00215459
IER5L	1.20135e-07	0.792031	0.063	0.051	0.00217131
NADK2	1.20721e-07	0.401283	0.111	0.11	0.00218192
UNC119	1.21404e-07	-0.243143	0.06	0.095	0.00219426
PIK3C2A	1.21818e-07	0.743562	0.079	0.073	0.00220174
SHISA9	1.23615e-07	-0.997934	0.027	0.066	0.00223422
MAPK8IP3	1.25729e-07	-0.132576	0.112	0.157	0.00227243
GOLGA7B	1.26218e-07	-0.439918	0.042	0.074	0.00228126
ANAPC13	1.26485e-07	-0.122767	0.097	0.139	0.00228608
PAFAH1B3	1.26543e-07	-0.358122	0.128	0.201	0.00228713
TSR3	1.266e-07	0.139667	0.072	0.099	0.00228817
MCTS1	1.27532e-07	-0.183188	0.101	0.147	0.00230502
IER2	1.27828e-07	0.365084	0.076	0.082	0.00231036
CFL2	1.29484e-07	0.213565	0.075	0.091	0.0023403
ACADVL	1.30218e-07	-0.231802	0.071	0.109	0.00235356
VPS13C	1.30813e-07	-0.218001	0.076	0.121	0.00236431
TERF2IP	1.30825e-07	-0.139844	0.358	0.448	0.00236452
PUM2	1.30828e-07	-0.127425	0.193	0.249	0.00236459
IGFBP7	1.32985e-07	-2.10198	0.003	0.025	0.00240358
CACFD1	1.3311e-07	-0.147849	0.059	0.091	0.00240582
RAD54L2	1.33154e-07	0.232769	0.074	0.094	0.00240662
FOXK2	1.33975e-07	0.416933	0.083	0.093	0.00242147
DLD	1.34952e-07	-0.250055	0.104	0.156	0.00243912
YIF1B	1.35991e-07	0.195565	0.109	0.135	0.0024579
MAVS	1.36805e-07	-0.109508	0.058	0.085	0.00247262
S100PBP	1.38402e-07	-0.387288	0.043	0.085	0.00250148
ALG13	1.39511e-07	0.253427	0.127	0.144	0.00252153
DDX42	1.39931e-07	0.164904	0.145	0.175	0.00252911
TM2D3	1.4079e-07	-0.376574	0.098	0.157	0.00254464
AMN1	1.4273e-07	0.248679	0.103	0.121	0.00257971
ZNF441	1.43489e-07	0.252448	0.06	0.072	0.00259342
ZBED8	1.43867e-07	0.389053	0.081	0.093	0.00260026
GTF2I	1.44898e-07	-0.255918	0.078	0.121	0.00261889
OXCT1	1.45411e-07	0.310384	0.073	0.085	0.00262817
RYBP	1.46209e-07	-0.101865	0.11	0.155	0.00264259
RAB5B	1.46752e-07	0.203139	0.115	0.138	0.0026524
PACS2	1.47103e-07	-0.135633	0.079	0.112	0.00265874
GABRB1	1.47712e-07	-1.16275	0.015	0.044	0.00266974
CNTFR	1.48036e-07	0.376473	0.144	0.144	0.0026756
SUPT7L	1.48531e-07	0.13199	0.08	0.1	0.00268455
CRTAP	1.50364e-07	0.898069	0.059	0.043	0.00271769
ZWILCH	1.50654e-07	0.484842	0.057	0.061	0.00272293
SKI	1.51232e-07	0.21884	0.118	0.138	0.00273337
MSH6	1.53139e-07	0.256503	0.094	0.113	0.00276783
MOB4	1.53354e-07	0.146932	0.16	0.184	0.00277173
CRBN	1.54074e-07	0.245367	0.07	0.092	0.00278473
MPC1	1.54375e-07	0.164491	0.193	0.217	0.00279018
ATP5F1C	1.54607e-07	0.194094	0.12	0.139	0.00279437
AZI2	1.56309e-07	0.305669	0.065	0.08	0.00282513
OSBPL9	1.56758e-07	0.12194	0.108	0.132	0.00283325
SHANK2	1.58071e-07	-0.111818	0.065	0.097	0.00285697
C11orf49	1.58269e-07	0.153036	0.139	0.159	0.00286056
GET1	1.5911e-07	0.211603	0.208	0.223	0.00287576
QSOX1	1.59318e-07	-0.933284	0.023	0.058	0.00287952
CACNA2D2	1.59322e-07	-0.350084	0.075	0.124	0.00287959
SLC25A12	1.59603e-07	0.19232	0.102	0.125	0.00288466
SOX9	1.60998e-07	0.450743	0.098	0.104	0.00290988
CIB1	1.61726e-07	0.784701	0.076	0.061	0.00292303
ASTN1	1.61772e-07	-0.234768	0.069	0.105	0.00292387
IGF2BP2	1.62356e-07	-0.235953	0.082	0.125	0.00293441
SLC7A5	1.6269e-07	0.234993	0.144	0.165	0.00294045
LAGE3	1.63698e-07	0.178267	0.065	0.085	0.00295868
TBCEL	1.64025e-07	-0.19424	0.094	0.133	0.00296459
NEDD4L	1.64169e-07	-0.256649	0.184	0.264	0.0029672
ATXN2L	1.64238e-07	0.190206	0.076	0.09	0.00296844
NRSN1	1.65812e-07	-0.265628	0.042	0.075	0.00299689
UBE2R2	1.69062e-07	0.148451	0.237	0.267	0.00305563
FOXO3	1.6928e-07	0.251184	0.054	0.068	0.00305957
PDE4D	1.69667e-07	-0.197745	0.085	0.131	0.00306655
PLPPR5	1.70919e-07	-1.61762	0.013	0.045	0.0030892
H2AFZ	1.7103e-07	0.13437	0.149	0.177	0.0030912
TFCP2	1.71494e-07	0.147229	0.08	0.105	0.00309959
SLC41A2	1.71814e-07	-0.390204	0.039	0.077	0.00310537
RBM15	1.72988e-07	0.157586	0.042	0.061	0.00312659
TRIP12	1.73202e-07	0.105997	0.149	0.182	0.00313044
SCAI	1.74645e-07	-0.584967	0.042	0.088	0.00315654
HGS	1.74903e-07	-0.230004	0.085	0.133	0.0031612
PSMD10	1.74942e-07	0.165133	0.157	0.175	0.0031619
APTX	1.75242e-07	0.146378	0.059	0.08	0.00316732
C3orf18	1.7534e-07	0.343504	0.022	0.034	0.00316909
PDE5A	1.75628e-07	2.58056	0.018	0.003	0.0031743
MTA1	1.75988e-07	-0.299312	0.149	0.208	0.00318081
MYDGF	1.7819e-07	0.328861	0.134	0.149	0.0032206
TMEM198	1.78349e-07	0.216252	0.077	0.096	0.00322347
MBOAT7	1.79949e-07	-0.109307	0.073	0.104	0.00325239
MAGEF1	1.80001e-07	0.103459	0.165	0.2	0.00325335
PPP1R12A	1.81187e-07	0.273532	0.11	0.122	0.00327478
C9orf72	1.83972e-07	0.224287	0.108	0.123	0.00332511
SKIL	1.8478e-07	0.10002	0.092	0.123	0.00333971
NKAIN3	1.85294e-07	-0.131259	0.081	0.115	0.003349
ZCCHC17	1.85947e-07	-0.11371	0.131	0.177	0.00336081
BCAT1	1.89397e-07	0.628531	0.118	0.094	0.00342315
ELMO2	1.92517e-07	-0.272036	0.085	0.132	0.00347956
PPP1R12C	1.93036e-07	-0.628689	0.054	0.102	0.00348893
ZNF146	1.94217e-07	0.169256	0.156	0.172	0.00351028
GPBP1	1.96033e-07	0.170734	0.169	0.198	0.00354311
IRGQ	1.9885e-07	-0.157295	0.164	0.228	0.00359402
SNX13	1.99762e-07	0.42034	0.092	0.096	0.0036105
KLHL42	2.00271e-07	-0.279453	0.062	0.105	0.0036197
ZNF738	2.00309e-07	-0.11241	0.067	0.101	0.00362039
ZNF280B	2.02335e-07	-0.170315	0.018	0.038	0.00365699
CYB5D2	2.03403e-07	-0.107148	0.069	0.099	0.00367631
TRMT112	2.03506e-07	0.312314	0.138	0.147	0.00367817
CPNE3	2.05182e-07	0.391902	0.119	0.125	0.00370846
MDK	2.05699e-07	0.690063	0.112	0.096	0.0037178
WRNIP1	2.07452e-07	-0.138934	0.068	0.104	0.00374949
COPS2	2.15276e-07	0.154307	0.168	0.195	0.00389091
MED17	2.16823e-07	0.157325	0.101	0.121	0.00391886
CCDC167	2.17968e-07	0.12478	0.076	0.1	0.00393956
PAM	2.18145e-07	-0.349984	0.118	0.179	0.00394276
PSMC4	2.18911e-07	0.282198	0.178	0.198	0.00395661
ARL2BP	2.19081e-07	-0.470257	0.057	0.106	0.00395967
SLC44A5	2.19196e-07	-0.602583	0.042	0.079	0.00396176
UQCRH	2.20439e-07	0.196788	0.152	0.181	0.00398421
RALGAPA2	2.2119e-07	0.14747	0.039	0.054	0.00399779
PBRM1	2.21372e-07	0.194287	0.171	0.197	0.00400108
DTX4	2.22069e-07	-0.225526	0.096	0.14	0.00401367
ALDH9A1	2.23989e-07	-0.670346	0.05	0.098	0.00404838
NDUFB2	2.25352e-07	0.17227	0.099	0.118	0.00407301
RNF44	2.28013e-07	0.121979	0.12	0.148	0.0041211
CNOT6L	2.30602e-07	-0.155495	0.075	0.112	0.00416789
EXOC6B	2.30834e-07	-0.167619	0.132	0.182	0.00417209
RAPGEFL1	2.32437e-07	-0.26767	0.055	0.094	0.00420106
ORC4	2.33591e-07	0.159331	0.11	0.13	0.00422192
XPO5	2.33776e-07	0.246328	0.107	0.121	0.00422528
UQCR11	2.38527e-07	0.108343	0.101	0.13	0.00431113
THYN1	2.39942e-07	0.213504	0.062	0.081	0.00433672
MCM3AP	2.42417e-07	-0.160846	0.078	0.115	0.00438144
CACNG7	2.43166e-07	0.433351	0.122	0.125	0.00439498
DPP9	2.45756e-07	0.277524	0.042	0.059	0.0044418
CCND2	2.45854e-07	0.1919	0.164	0.195	0.00444357
POLDIP3	2.47135e-07	-0.102399	0.146	0.198	0.00446671
ADGRL3	2.50326e-07	-0.699743	0.048	0.103	0.00452439
ADSL	2.51049e-07	0.253337	0.093	0.106	0.00453746
CHN1	2.5184e-07	0.540339	0.076	0.081	0.00455175
EEF1B2	2.5431e-07	0.221347	0.108	0.125	0.0045964
TATDN3	2.55133e-07	0.391542	0.076	0.079	0.00461128
SCN2A	2.55593e-07	-0.295888	0.071	0.11	0.00461959
ZNF454	2.55688e-07	-0.56565	0.019	0.047	0.00462131
TMEM68	2.55689e-07	0.294447	0.151	0.162	0.00462132
NACC1	2.56726e-07	0.35962	0.059	0.063	0.00464006
BABAM2	2.57699e-07	0.405935	0.066	0.074	0.00465765
COX18	2.58916e-07	0.19077	0.081	0.101	0.00467966
AGAP3	2.59683e-07	-0.179756	0.076	0.11	0.0046935
ZFHX4	2.63174e-07	0.813822	0.104	0.083	0.00475661
PHKB	2.64046e-07	-0.317569	0.09	0.139	0.00477238
COMMD3	2.65999e-07	-0.501563	0.042	0.079	0.00480766
REPIN1	2.68463e-07	-0.163421	0.055	0.085	0.00485221
MTMR6	2.69059e-07	-0.318806	0.057	0.097	0.00486297
DISP2	2.69707e-07	-0.167705	0.05	0.084	0.00487469
SHOC2	2.70143e-07	0.296155	0.172	0.185	0.00488257
VPS25	2.70294e-07	0.320779	0.107	0.121	0.0048853
ECSIT	2.70599e-07	0.111994	0.097	0.126	0.00489081
RBM15B	2.71155e-07	0.119516	0.111	0.135	0.00490085
MYCBP2	2.72093e-07	0.305821	0.106	0.116	0.00491782
ERCC5	2.74666e-07	0.398201	0.076	0.084	0.00496431
TOP1	2.75415e-07	0.12329	0.143	0.17	0.00497786
RNF150	2.75906e-07	0.202643	0.055	0.07	0.00498673
GFOD2	2.80297e-07	-0.378677	0.095	0.156	0.00506609
TMEM160	2.81184e-07	0.130885	0.078	0.108	0.00508212
C6orf226	2.84926e-07	0.348194	0.059	0.07	0.00514976
TSPYL4	2.86321e-07	-0.433885	0.144	0.23	0.00517496
HACD3	2.87121e-07	-0.133507	0.14	0.184	0.00518943
NPAS3	2.9032e-07	0.255102	0.065	0.077	0.00524724
SLC35F1	2.92822e-07	0.527362	0.105	0.105	0.00529247
NECAB2	2.97083e-07	-1.14249	0.03	0.07	0.00536948
PALM	3.01364e-07	-0.109328	0.092	0.128	0.00544686
PGAP1	3.01885e-07	0.289787	0.15	0.163	0.00545626
CD63	3.04004e-07	0.101567	0.157	0.193	0.00549457
CCT2	3.0607e-07	0.124697	0.089	0.113	0.00553191
SUCLG1	3.10285e-07	-0.236373	0.078	0.125	0.00560809
SEC23A	3.10886e-07	0.368668	0.172	0.175	0.00561896
SPTBN2	3.11249e-07	-0.85158	0.05	0.108	0.00562552
INSRR	3.12045e-07	-0.852593	0.008	0.029	0.00563991
EPS15L1	3.14869e-07	0.236671	0.122	0.137	0.00569094
PTPRA	3.16439e-07	-0.249262	0.107	0.155	0.00571932
SPEG	3.16827e-07	-0.384925	0.048	0.083	0.00572633
NCL	3.17166e-07	-0.466588	0.055	0.1	0.00573247
CTDSPL2	3.18585e-07	0.32647	0.066	0.078	0.00575811
TTC1	3.19746e-07	-0.101746	0.077	0.111	0.0057791
C5orf24	3.21735e-07	0.23558	0.086	0.1	0.00581504
TRAPPC5	3.2587e-07	-0.290998	0.094	0.144	0.00588977
DPP6	3.26593e-07	-0.23574	0.05	0.08	0.00590285
EDEM3	3.2706e-07	-0.155939	0.12	0.167	0.00591128
PET100	3.28325e-07	-0.302605	0.063	0.104	0.00593414
SUPT16H	3.3159e-07	0.178316	0.142	0.17	0.00599317
USP14	3.33793e-07	-0.192298	0.15	0.205	0.00603297
PTMS	3.35145e-07	-0.513181	0.175	0.29	0.00605741
GPR137C	3.35216e-07	-0.138921	0.082	0.116	0.00605869
SMIM29	3.35921e-07	0.162064	0.075	0.093	0.00607143
U2SURP	3.36374e-07	-0.110613	0.095	0.136	0.00607962
HSPB1	3.40773e-07	0.243541	0.1	0.119	0.00615914
SRC	3.42149e-07	-0.500794	0.043	0.089	0.006184
CCDC90B	3.44536e-07	-0.200854	0.075	0.109	0.00622715
RAB2B	3.47097e-07	0.487792	0.11	0.111	0.00627343
ERLIN2	3.47743e-07	0.578946	0.067	0.06	0.0062851
DRAXIN	3.48349e-07	0.408392	0.084	0.092	0.00629606
ASCC1	3.5128e-07	0.321004	0.085	0.097	0.00634903
LPAR2	3.51881e-07	-0.368908	0.058	0.099	0.0063599
PARP8	3.55298e-07	-0.451893	0.036	0.065	0.00642166
ZKSCAN8	3.567e-07	0.120107	0.105	0.129	0.006447
TIAM1	3.57697e-07	-0.559449	0.042	0.085	0.00646502
SMIM26	3.59639e-07	0.28622	0.085	0.102	0.00650011
RAB10	3.59712e-07	-0.260866	0.112	0.165	0.00650143
RCAN1	3.59867e-07	-0.324781	0.03	0.053	0.00650424
PTPRN2	3.62207e-07	-0.118521	0.126	0.167	0.00654653
NELFA	3.63302e-07	0.178929	0.11	0.133	0.00656632
PPP1R9A	3.64432e-07	-0.742799	0.054	0.101	0.00658674
SRI	3.64797e-07	-0.389395	0.106	0.163	0.00659334
NSMF	3.65736e-07	-0.700304	0.058	0.112	0.00661031
DYNC1LI1	3.67648e-07	-0.203633	0.087	0.13	0.00664487
PPP5C	3.67921e-07	-0.234576	0.059	0.096	0.00664981
DDX41	3.69354e-07	-0.457452	0.023	0.046	0.0066757
LMBR1	3.69592e-07	-0.179567	0.098	0.146	0.00668
NEURL1	3.71498e-07	-0.368713	0.068	0.115	0.00671445
NEFL	3.72593e-07	0.594145	0.102	0.09	0.00673425
VPS41	3.75273e-07	-0.135734	0.071	0.11	0.00678268
EXOC1	3.75845e-07	0.435265	0.133	0.128	0.00679303
DLG3	3.76078e-07	-0.524331	0.049	0.088	0.00679723
AHCYL2	3.7811e-07	-0.127624	0.072	0.104	0.00683396
ELOC	3.78568e-07	0.425403	0.089	0.092	0.00684224
ATXN1	3.78649e-07	0.21137	0.094	0.114	0.0068437
MEX3B	3.79413e-07	-0.429201	0.073	0.124	0.00685751
FAM49B	3.80101e-07	-0.279205	0.07	0.109	0.00686995
MEA1	3.80509e-07	0.127132	0.109	0.132	0.00687732
TTC37	3.81692e-07	0.172956	0.128	0.148	0.0068987
PHTF1	3.84665e-07	-0.595895	0.037	0.074	0.00695244
PTBP2	3.84822e-07	-0.159102	0.212	0.281	0.00695528
SHARPIN	3.84941e-07	0.513721	0.084	0.085	0.00695743
EPB41L5	3.86674e-07	-0.220803	0.09	0.133	0.00698874
MRFAP1L1	3.87737e-07	-0.128049	0.178	0.235	0.00700796
EIF4E3	3.88193e-07	-0.410313	0.075	0.121	0.00701619
TTC9	3.8822e-07	-0.658324	0.026	0.058	0.00701669
DGKB	3.92712e-07	-1.44743	0.01	0.039	0.00709788
PCF11	3.96722e-07	0.141428	0.069	0.096	0.00717036
KIF1A	3.97148e-07	-0.205111	0.186	0.264	0.00717806
PTPN5	4.0529e-07	-0.251789	0.057	0.09	0.00732521
EFR3B	4.06975e-07	-0.208098	0.092	0.138	0.00735567
FTO	4.0858e-07	-0.388278	0.07	0.113	0.00738467
ALDH18A1	4.09308e-07	0.236109	0.093	0.106	0.00739783
TBC1D10B	4.11588e-07	-0.162349	0.07	0.106	0.00743905
TUBGCP2	4.13384e-07	-0.113094	0.082	0.118	0.0074715
TMEM14C	4.14219e-07	-0.385742	0.06	0.105	0.0074866
DGCR2	4.23485e-07	-0.270695	0.109	0.156	0.00765407
TTC17	4.29084e-07	0.257258	0.116	0.13	0.00775527
ZCCHC12	4.29431e-07	-0.402291	0.098	0.151	0.00776153
TINF2	4.30289e-07	0.351063	0.073	0.083	0.00777705
RBM26	4.32562e-07	0.183562	0.093	0.112	0.00781812
RINT1	4.32852e-07	0.329121	0.078	0.08	0.00782336
TMEFF2	4.32882e-07	-1.0233	0.059	0.127	0.00782391
EIF3D	4.37063e-07	0.252745	0.055	0.069	0.00789948
LRRC4	4.38853e-07	-0.474707	0.026	0.055	0.00793183
ZFP14	4.39019e-07	-0.217213	0.031	0.055	0.00793484
RNF111	4.51321e-07	-0.145426	0.06	0.097	0.00815718
PDXP	4.52464e-07	-0.248542	0.092	0.14	0.00817783
LMBRD1	4.5597e-07	0.120241	0.112	0.134	0.00824121
LDLR	4.58596e-07	0.450185	0.059	0.065	0.00828866
SLIT2	4.59163e-07	-0.535411	0.043	0.085	0.00829891
UBE2L6	4.60086e-07	-0.303969	0.059	0.098	0.0083156
NSUN6	4.61535e-07	0.133887	0.1	0.123	0.00834178
CSAD	4.70518e-07	0.634736	0.072	0.07	0.00850415
ATRNL1	4.70766e-07	-0.208445	0.433	0.538	0.00850862
FBXO41	4.72086e-07	-0.57485	0.041	0.08	0.00853249
TNK2	4.77484e-07	-0.353104	0.096	0.149	0.00863005
NPRL2	4.79258e-07	0.143368	0.095	0.124	0.0086621
UHMK1	4.80815e-07	0.144542	0.062	0.076	0.00869024
ZBTB41	4.81724e-07	0.24392	0.08	0.095	0.00870669
AGPAT5	4.87061e-07	-0.190836	0.144	0.203	0.00880314
C11orf71	4.89241e-07	0.168341	0.072	0.088	0.00884255
ATRAID	4.90574e-07	0.253389	0.11	0.125	0.00886663
DCAF11	4.90912e-07	0.144553	0.086	0.108	0.00887274
ORC3	4.92522e-07	0.38851	0.093	0.105	0.00890184
PPP3CA	4.94276e-07	-0.121685	0.087	0.122	0.00893355
VDAC3	4.9616e-07	0.236209	0.148	0.171	0.0089676
CNTROB	4.98254e-07	0.596298	0.076	0.077	0.00900544
ZHX1	4.99596e-07	0.331608	0.087	0.099	0.0090297
SEC16A	4.99827e-07	0.206863	0.091	0.108	0.00903387
MORN2	5.00345e-07	0.224286	0.058	0.075	0.00904323
PDZD8	5.01789e-07	0.303625	0.075	0.091	0.00906933
CPLX2	5.02585e-07	-0.148207	0.065	0.093	0.00908372
STK40	5.03624e-07	0.147396	0.082	0.105	0.0091025
DENND5A	5.045e-07	-0.248427	0.055	0.09	0.00911834
PDS5B	5.04547e-07	-0.110568	0.11	0.155	0.00911918
SNCB	5.04947e-07	-0.465614	0.033	0.067	0.00912641
TMEM267	5.07069e-07	0.798575	0.059	0.051	0.00916477
LARGE1	5.08809e-07	-1.27304	0.016	0.049	0.00919621
TIMM17B	5.11498e-07	-0.177908	0.082	0.125	0.00924482
PPIG	5.18619e-07	0.355657	0.129	0.141	0.00937352
E2F4	5.18635e-07	0.26856	0.099	0.115	0.0093738
MICU2	5.19215e-07	0.16668	0.144	0.172	0.00938429
SYNRG	5.23257e-07	-0.328434	0.095	0.142	0.00945734
SLC35F6	5.29991e-07	0.190324	0.074	0.087	0.00957905
TNRC6A	5.33655e-07	0.13779	0.169	0.198	0.00964528
RSPH3	5.35582e-07	-0.243053	0.033	0.058	0.0096801
RGMB	5.36012e-07	0.241392	0.13	0.141	0.00968788
ST3GAL5	5.36243e-07	-0.484534	0.038	0.08	0.00969205
UBLCP1	5.36421e-07	0.198262	0.104	0.122	0.00969527
PGP	5.40255e-07	0.108556	0.076	0.095	0.00976457
CENPT	5.41192e-07	-0.233499	0.071	0.111	0.0097815
NYAP2	5.46825e-07	-0.645148	0.022	0.052	0.00988332
USF1	5.48719e-07	-0.513165	0.088	0.148	0.00991756
ZNF154	5.5271e-07	0.125189	0.049	0.068	0.00998968
YPEL3	5.53029e-07	0.399078	0.08	0.085	0.00999545
KIAA0408	5.54095e-07	-0.247295	0.17	0.246	0.0100147
LRRC47	5.55599e-07	0.150399	0.152	0.181	0.0100419
CHD8	5.5925e-07	0.331421	0.13	0.138	0.0101079
USP34	5.59666e-07	-0.246014	0.106	0.156	0.0101154
SBF1	5.61555e-07	-0.514887	0.072	0.127	0.0101496
PRRT4	5.77326e-07	-0.664208	0.039	0.076	0.0104346
EXT1	5.91131e-07	0.296731	0.127	0.139	0.0106841
SEPTIN6	5.93885e-07	0.156241	0.093	0.11	0.0107339
EAF1	5.98214e-07	0.145162	0.06	0.081	0.0108121
VPS37B	6.09053e-07	-0.541554	0.06	0.115	0.011008
HAX1	6.10704e-07	0.28415	0.074	0.084	0.0110379
EFNB2	6.13179e-07	0.628464	0.097	0.09	0.0110826
ZSCAN16	6.14142e-07	-1.23927	0.019	0.05	0.0111
GLUD1	6.14905e-07	-0.119815	0.057	0.089	0.0111138
ESD	6.18798e-07	0.286222	0.153	0.172	0.0111842
TP53INP1	6.19022e-07	0.140632	0.061	0.085	0.0111882
UBN1	6.20206e-07	0.671392	0.087	0.076	0.0112096
AATF	6.29155e-07	0.233529	0.058	0.072	0.0113714
PLEKHA1	6.31673e-07	0.126393	0.06	0.082	0.0114169
SLC39A9	6.41801e-07	0.369189	0.093	0.097	0.0115999
MED12L	6.44799e-07	-0.488631	0.059	0.1	0.0116541
EPHB3	6.51734e-07	-0.222666	0.07	0.108	0.0117794
SH3GLB2	6.52913e-07	-0.469055	0.067	0.113	0.0118008
BANF1	6.56391e-07	0.305158	0.142	0.155	0.0118636
OARD1	6.56693e-07	0.373925	0.095	0.107	0.0118691
SEPTIN9	6.59851e-07	-0.272304	0.094	0.147	0.0119261
EIF1AD	6.59982e-07	0.229908	0.059	0.075	0.0119285
KLHL12	6.71738e-07	0.316607	0.086	0.097	0.012141
AFAP1	6.75448e-07	-0.190015	0.093	0.139	0.0122081
SHC3	6.7581e-07	-0.499961	0.056	0.097	0.0122146
TOX3	6.77211e-07	-0.199415	0.053	0.089	0.0122399
VPS33A	6.82443e-07	-0.463292	0.044	0.078	0.0123345
FAM234A	6.83506e-07	0.397929	0.077	0.084	0.0123537
OPCML	6.86336e-07	-0.883482	0.017	0.046	0.0124048
RNF208	6.87083e-07	0.354145	0.057	0.066	0.0124183
EDC4	6.87573e-07	-0.224766	0.073	0.113	0.0124272
ELOVL4	6.88091e-07	-0.387627	0.067	0.113	0.0124366
ADRM1	6.88618e-07	0.100643	0.125	0.15	0.0124461
CHCHD1	6.92187e-07	0.107371	0.055	0.078	0.0125106
SYN3	6.9316e-07	-1.06724	0.018	0.048	0.0125282
SLC7A11	6.94011e-07	1.04134	0.058	0.035	0.0125436
SEPHS1	6.9867e-07	-0.137951	0.081	0.119	0.0126278
RPTOR	6.99851e-07	0.255461	0.095	0.111	0.0126491
DCUN1D4	7.01117e-07	0.453893	0.1	0.1	0.012672
KIAA1324L	7.03443e-07	-0.338582	0.07	0.112	0.012714
SLC37A3	7.04074e-07	-0.154309	0.085	0.127	0.0127254
NSFL1C	7.08809e-07	0.223643	0.148	0.162	0.012811
PSMD13	7.19477e-07	0.302239	0.19	0.196	0.0130038
RAB7A	7.26181e-07	-0.133009	0.091	0.13	0.013125
ATP13A1	7.52812e-07	-0.121724	0.085	0.119	0.0136063
DLGAP3	7.55648e-07	-0.597977	0.043	0.08	0.0136576
THEM6	7.58146e-07	-0.284378	0.019	0.043	0.0137027
SNTG2	7.61531e-07	-4.71527	0.001	0.018	0.0137639
DNAJB4	7.61799e-07	0.420489	0.104	0.102	0.0137688
OST4	7.63324e-07	0.244214	0.076	0.093	0.0137963
CHURC1	7.64121e-07	0.191193	0.107	0.128	0.0138107
SSR4	7.6852e-07	0.244781	0.14	0.155	0.0138902
RXRB	7.69915e-07	0.217135	0.088	0.099	0.0139154
BTBD8	7.77083e-07	-0.523483	0.093	0.147	0.014045
CNOT8	7.82055e-07	-0.132762	0.13	0.178	0.0141349
FAM228B	7.83547e-07	0.723095	0.05	0.047	0.0141618
STRN4	7.87088e-07	-0.162736	0.129	0.185	0.0142258
BAG1	7.87172e-07	-0.666854	0.036	0.079	0.0142273
NCSTN	7.9028e-07	0.301483	0.083	0.095	0.0142835
SERP1	7.9598e-07	0.157512	0.129	0.147	0.0143865
RPN1	7.97474e-07	0.136937	0.076	0.097	0.0144136
PDIA2	8.16956e-07	-0.705749	0.019	0.046	0.0147657
KCND3	8.18512e-07	-0.809755	0.019	0.05	0.0147938
SPG21	8.22924e-07	0.18605	0.121	0.14	0.0148735
MAP3K13	8.24435e-07	0.102146	0.104	0.128	0.0149008
AMPH	8.28593e-07	-0.922039	0.029	0.071	0.014976
TRIM23	8.32741e-07	-0.185712	0.071	0.11	0.015051
SEC23IP	8.36102e-07	0.560889	0.085	0.079	0.0151117
SHMT2	8.37141e-07	0.814313	0.058	0.047	0.0151305
RELA	8.44479e-07	0.335933	0.056	0.063	0.0152631
ZDHHC16	8.46267e-07	-0.251152	0.069	0.104	0.0152954
CUX2	8.50328e-07	-1.58119	0.008	0.032	0.0153688
SRA1	8.50463e-07	-0.320653	0.093	0.146	0.0153713
DCBLD2	8.62996e-07	0.534276	0.083	0.08	0.0155978
SEC23B	8.71967e-07	0.142365	0.103	0.126	0.0157599
PPP2CA	8.74401e-07	-0.457429	0.064	0.112	0.0158039
GOLT1B	8.74749e-07	0.10122	0.134	0.153	0.0158102
RNF146	8.7907e-07	-0.271497	0.072	0.106	0.0158883
LARS	8.82759e-07	0.220186	0.129	0.153	0.015955
DAB1	8.87227e-07	-0.549683	0.029	0.057	0.0160357
SART1	8.88906e-07	-0.430426	0.039	0.078	0.0160661
VSTM2B	8.94392e-07	-0.946801	0.013	0.043	0.0161652
C2CD2L	8.96633e-07	0.317485	0.059	0.069	0.0162057
TTC9B	9.0514e-07	-0.397229	0.076	0.125	0.0163595
LUC7L2	9.08931e-07	0.16428	0.169	0.189	0.016428
ATP8B2	9.3563e-07	-0.327205	0.054	0.089	0.0169106
TIMP2	9.4182e-07	-1.00935	0.069	0.153	0.0170225
DMAC1	9.45988e-07	0.230654	0.062	0.078	0.0170978
DNAJC6	9.46483e-07	-0.1994	0.076	0.115	0.0171067
LAMP2	9.46704e-07	0.138372	0.085	0.104	0.0171107
RABEP1	9.56014e-07	-0.161332	0.113	0.156	0.017279
IREB2	9.57119e-07	-0.136215	0.078	0.115	0.017299
SLC38A10	9.58171e-07	0.335849	0.114	0.117	0.017318
DNHD1	9.67683e-07	0.601287	0.06	0.06	0.0174899
TMEM130	9.70228e-07	-0.341244	0.043	0.08	0.0175359
NMT2	9.7587e-07	-0.61898	0.018	0.048	0.0176379
LMF2	9.76928e-07	0.39212	0.095	0.106	0.017657
CREB3	9.78123e-07	0.188284	0.171	0.189	0.0176786
ERLEC1	9.79545e-07	0.175292	0.135	0.158	0.0177043
TMEM74B	9.80056e-07	-0.652672	0.059	0.104	0.0177135
ACTR3	9.84523e-07	-0.100356	0.05	0.08	0.0177943
MMP24	9.88659e-07	-0.38697	0.102	0.156	0.017869
FEM1A	9.93073e-07	-0.588455	0.042	0.084	0.0179488
MYL6B	9.95083e-07	-0.112992	0.11	0.154	0.0179851
CCNY	1.00232e-06	0.171994	0.084	0.108	0.018116
MLEC	1.00942e-06	0.223181	0.129	0.146	0.0182443
GP1BB	1.01408e-06	-0.350097	0.054	0.091	0.0183286
LRFN5	1.01597e-06	0.36388	0.044	0.057	0.0183627
DDRGK1	1.02254e-06	0.199284	0.128	0.149	0.0184815
SULF2	1.02558e-06	-0.262956	0.065	0.102	0.0185364
LMAN2	1.02693e-06	0.122084	0.099	0.127	0.0185608
TBC1D17	1.02768e-06	-0.199132	0.05	0.074	0.0185743
MKRN2	1.03544e-06	0.291886	0.079	0.089	0.0187146
TRAP1	1.0365e-06	0.179493	0.157	0.184	0.0187338
CHMP1A	1.03753e-06	0.155761	0.083	0.103	0.0187523
MPP6	1.04041e-06	0.453802	0.07	0.074	0.0188044
MANBAL	1.04124e-06	0.321394	0.071	0.083	0.0188194
COX7A2L	1.04206e-06	0.168139	0.261	0.287	0.0188343
TCEAL8	1.04822e-06	0.310928	0.094	0.11	0.0189455
CNTNAP1	1.04911e-06	-0.449078	0.038	0.07	0.0189616
GLRA2	1.0562e-06	0.590681	0.042	0.043	0.0190897
CNEP1R1	1.06484e-06	0.499477	0.064	0.069	0.0192459
UBC	1.06516e-06	-0.224072	0.129	0.176	0.0192518
RIMBP2	1.0836e-06	-0.706156	0.022	0.046	0.0195851
ZNF281	1.08794e-06	-0.275517	0.066	0.102	0.0196635
CCDC47	1.08947e-06	0.254042	0.12	0.135	0.019691
RAD21	1.10026e-06	0.117415	0.084	0.105	0.0198861
CAMKMT	1.10076e-06	0.721667	0.063	0.055	0.0198952
GRB10	1.1034e-06	0.263188	0.084	0.092	0.0199429
BPGM	1.11102e-06	-0.764164	0.035	0.074	0.0200805
ATP6V0B	1.11808e-06	-0.437753	0.127	0.203	0.0202081
LRRFIP2	1.12719e-06	0.100921	0.076	0.102	0.0203729
TMEM145	1.13464e-06	-0.403957	0.065	0.112	0.0205075
DFFA	1.13527e-06	0.306204	0.076	0.086	0.0205189
PARP6	1.13717e-06	-0.181021	0.121	0.17	0.0205532
HECTD1	1.14547e-06	-0.468115	0.061	0.109	0.0207032
PAK2	1.14559e-06	0.18365	0.124	0.138	0.0207055
BRD7	1.14966e-06	-0.304859	0.067	0.111	0.020779
TRAPPC6B	1.15365e-06	0.185404	0.159	0.178	0.020851
PPP2R3B	1.15589e-06	0.403963	0.106	0.111	0.0208915
PLCB4	1.15825e-06	-0.937141	0.022	0.054	0.0209342
C11orf95	1.15923e-06	0.142298	0.089	0.113	0.020952
P4HTM	1.16365e-06	-0.208845	0.108	0.156	0.0210317
WDR54	1.16405e-06	-0.347573	0.057	0.092	0.0210391
ARMC6	1.17052e-06	0.208474	0.074	0.091	0.021156
TARS	1.17142e-06	0.451007	0.033	0.042	0.0211722
ZNF783	1.17402e-06	0.384315	0.053	0.062	0.0212192
HS3ST3B1	1.18518e-06	2.32321	0.017	0.004	0.0214209
TUBE1	1.19109e-06	0.254974	0.071	0.084	0.0215277
BRD8	1.19361e-06	-0.161321	0.087	0.128	0.0215734
HNRNPA0	1.2031e-06	-0.210175	0.301	0.395	0.0217448
TCF20	1.20334e-06	0.164097	0.081	0.104	0.0217491
ROGDI	1.2094e-06	-0.349196	0.04	0.073	0.0218587
CHCHD3	1.21309e-06	0.173592	0.064	0.079	0.0219254
POLR2C	1.22019e-06	0.446457	0.089	0.091	0.0220537
PSMF1	1.22913e-06	-0.205246	0.151	0.204	0.0222153
SDC2	1.23804e-06	-0.518633	0.035	0.071	0.0223763
UBTD2	1.25e-06	0.314099	0.081	0.09	0.0225925
HMG20A	1.25351e-06	-0.708414	0.041	0.082	0.0226559
BMERB1	1.25464e-06	-0.249689	0.113	0.163	0.0226764
ARHGAP23	1.26036e-06	-1.30682	0.026	0.078	0.0227798
SYN2	1.26357e-06	-0.580565	0.015	0.038	0.0228378
RAB3IP	1.26591e-06	-0.357497	0.081	0.125	0.0228801
NICN1	1.27828e-06	0.316521	0.091	0.099	0.0231037
MTFR1L	1.28439e-06	0.178934	0.084	0.104	0.0232141
TUT4	1.28675e-06	-0.208088	0.119	0.173	0.0232568
NAP1L2	1.28855e-06	-0.403211	0.037	0.069	0.0232893
MDH1	1.29675e-06	0.243048	0.095	0.106	0.0234375
KDM4A	1.29771e-06	-0.363427	0.058	0.102	0.0234548
LSM6	1.29986e-06	0.128206	0.05	0.069	0.0234937
CEP70	1.306e-06	0.28337	0.042	0.054	0.0236046
FSCN1	1.31192e-06	-0.241768	0.12	0.168	0.0237116
TMEM41B	1.31394e-06	0.323589	0.156	0.164	0.0237482
JPH3	1.31788e-06	-0.613305	0.036	0.078	0.0238195
RDH11	1.32141e-06	-0.271893	0.066	0.11	0.0238832
YBX3	1.32685e-06	1.37527	0.039	0.025	0.0239815
HSPA4L	1.32688e-06	0.284252	0.054	0.064	0.0239821
IFNAR1	1.33006e-06	-0.648599	0.045	0.095	0.0240395
PIGQ	1.33211e-06	-0.255965	0.075	0.114	0.0240765
RC3H2	1.33317e-06	-0.245856	0.075	0.118	0.0240957
SLC25A16	1.3459e-06	0.140508	0.099	0.126	0.0243258
NAP1L5	1.34613e-06	-0.320966	0.094	0.144	0.0243299
TAFA5	1.34709e-06	-0.193435	0.072	0.108	0.0243473
SBF2	1.35003e-06	0.300123	0.065	0.077	0.0244004
MRTO4	1.3504e-06	0.383299	0.038	0.046	0.0244071
GNA13	1.36714e-06	0.125258	0.068	0.087	0.0247097
APBB3	1.37044e-06	0.328524	0.195	0.201	0.0247693
SSR1	1.37316e-06	0.493449	0.085	0.083	0.0248185
PAK5	1.37565e-06	0.151703	0.047	0.067	0.0248636
NAP1L3	1.3866e-06	-0.393581	0.127	0.183	0.0250614
NME3	1.3881e-06	0.158286	0.042	0.057	0.0250886
LEMD2	1.38828e-06	0.111119	0.105	0.126	0.0250917
TBC1D20	1.39182e-06	0.101743	0.065	0.081	0.0251558
CNTRL	1.395e-06	-0.220905	0.098	0.141	0.0252133
NUP133	1.39646e-06	0.127237	0.102	0.123	0.0252395
RRAGC	1.39707e-06	0.321695	0.059	0.065	0.0252506
SYNGR1	1.40016e-06	-0.39479	0.075	0.117	0.0253064
VDAC2	1.40211e-06	0.230192	0.117	0.141	0.0253418
TRIM8	1.40474e-06	0.163704	0.089	0.11	0.0253893
DNAJB1	1.40629e-06	0.328571	0.092	0.101	0.0254173
PTPN23	1.40753e-06	0.275225	0.102	0.115	0.0254397
AGPAT4	1.41087e-06	-0.258301	0.163	0.226	0.0255
CSNK1D	1.4121e-06	0.112126	0.173	0.204	0.0255223
ZNF772	1.41377e-06	-0.237741	0.042	0.073	0.0255525
CTNNBIP1	1.41466e-06	-0.197393	0.091	0.13	0.0255685
ATP6V1G1	1.41822e-06	0.178376	0.133	0.152	0.0256329
TAF15	1.42257e-06	0.160525	0.086	0.103	0.0257115
EDF1	1.42808e-06	0.504892	0.083	0.083	0.0258111
AMPD2	1.4345e-06	-0.227251	0.062	0.1	0.0259271
TBC1D15	1.43808e-06	0.526824	0.103	0.096	0.0259919
FAM221A	1.4391e-06	-0.477474	0.033	0.067	0.0260103
CDKN1A	1.44318e-06	0.333887	0.216	0.21	0.026084
PRKCB	1.44815e-06	-0.725992	0.043	0.083	0.0261739
SLITRK1	1.45159e-06	-0.560448	0.057	0.103	0.026236
C9orf78	1.45311e-06	0.142472	0.083	0.107	0.0262636
MASP1	1.45557e-06	0.260228	0.054	0.071	0.026308
PLXNB1	1.46095e-06	-0.67511	0.051	0.095	0.0264052
SLC25A4	1.46339e-06	0.100868	0.15	0.174	0.0264493
ALDH5A1	1.47063e-06	0.486515	0.072	0.074	0.0265802
MRFAP1	1.47378e-06	-0.17931	0.058	0.093	0.0266372
DDX18	1.47748e-06	0.302328	0.138	0.151	0.026704
KALRN	1.48267e-06	-0.499506	0.085	0.151	0.0267978
SGIP1	1.48913e-06	-0.390245	0.07	0.113	0.0269146
MOGS	1.49236e-06	0.212568	0.105	0.118	0.0269729
ALAD	1.49942e-06	-0.353543	0.034	0.062	0.0271005
CRTC1	1.50953e-06	-0.557948	0.043	0.078	0.0272833
ME2	1.51671e-06	0.119572	0.076	0.099	0.027413
CHMP4B	1.51722e-06	-0.124957	0.1	0.141	0.0274223
GPT2	1.52156e-06	0.528136	0.073	0.077	0.0275006
XPC	1.52558e-06	0.165889	0.069	0.083	0.0275734
CCT8	1.5384e-06	0.22283	0.093	0.111	0.027805
OGFOD1	1.54753e-06	-0.131733	0.056	0.082	0.02797
NCOA6	1.56785e-06	0.158871	0.066	0.088	0.0283373
CABIN1	1.57433e-06	0.224507	0.081	0.099	0.0284545
DNAJC25	1.58703e-06	0.336866	0.085	0.093	0.0286839
SETD7	1.5998e-06	-0.272658	0.038	0.061	0.0289148
PPAN	1.6136e-06	0.11172	0.064	0.078	0.0291642
SPTLC1	1.62943e-06	0.378231	0.075	0.084	0.0294503
SNAP29	1.63181e-06	0.31816	0.054	0.067	0.0294934
GRIP2	1.63952e-06	-0.232068	0.05	0.084	0.0296328
MICAL3	1.63959e-06	-0.338164	0.055	0.09	0.0296339
SEL1L	1.64771e-06	0.262652	0.123	0.13	0.0297807
AAK1	1.65921e-06	0.310477	0.143	0.144	0.0299886
KXD1	1.6634e-06	0.342505	0.117	0.124	0.0300643
LRRC59	1.66456e-06	0.215882	0.105	0.12	0.0300853
ANKLE2	1.66548e-06	-0.378309	0.055	0.091	0.030102
PRR7	1.66925e-06	0.146487	0.075	0.097	0.03017
TXNDC12	1.67882e-06	0.260805	0.059	0.07	0.0303429
TMED7	1.68481e-06	-0.270223	0.091	0.138	0.0304512
RTL6	1.69521e-06	-0.210453	0.056	0.088	0.0306393
ARF5	1.69746e-06	-0.113399	0.131	0.173	0.0306798
SCN1A	1.69914e-06	-0.795213	0.014	0.039	0.0307102
LMNA	1.70359e-06	0.156861	0.085	0.106	0.0307906
IMP4	1.70482e-06	-0.431461	0.046	0.085	0.0308129
QRICH1	1.71397e-06	-0.108328	0.081	0.119	0.0309784
ERP44	1.71805e-06	-0.129948	0.063	0.091	0.031052
KLHDC8B	1.71877e-06	-0.235026	0.037	0.069	0.0310651
DAP	1.71973e-06	0.680997	0.081	0.067	0.0310824
TSSC4	1.72292e-06	-0.10219	0.055	0.084	0.03114
PCDHB2	1.72937e-06	-0.144902	0.145	0.2	0.0312566
NAPB	1.73642e-06	-0.153589	0.093	0.134	0.031384
DCUN1D5	1.75064e-06	0.3013	0.105	0.12	0.0316411
SLTM	1.75524e-06	-0.449727	0.08	0.139	0.0317241
TAF1	1.75817e-06	0.177928	0.053	0.069	0.0317771
CRY1	1.77041e-06	0.168163	0.067	0.087	0.0319984
PMPCA	1.77237e-06	0.126961	0.042	0.059	0.0320337
COPA	1.80665e-06	0.126883	0.291	0.319	0.0326534
TET1	1.80906e-06	0.235203	0.089	0.103	0.0326969
LYRM1	1.81621e-06	0.621222	0.059	0.056	0.0328262
VPS72	1.82179e-06	-0.69471	0.052	0.108	0.0329271
NDUFS7	1.83076e-06	0.243502	0.097	0.116	0.0330892
ARHGDIG	1.83579e-06	0.152317	0.121	0.14	0.03318
DTNB	1.83661e-06	-0.124953	0.084	0.12	0.0331949
N4BP2	1.83731e-06	-0.162409	0.126	0.17	0.0332076
DUT	1.83956e-06	0.328651	0.095	0.109	0.0332482
ARID2	1.84023e-06	-0.364692	0.086	0.133	0.0332603
PSEN1	1.84562e-06	0.259186	0.096	0.109	0.0333577
YIPF2	1.8525e-06	0.121253	0.076	0.099	0.033482
ALG3	1.87673e-06	0.286489	0.081	0.093	0.03392
ISYNA1	1.87693e-06	0.178078	0.097	0.116	0.0339236
AADAT	1.87737e-06	-0.51396	0.052	0.092	0.0339317
APEH	1.9067e-06	0.122649	0.106	0.124	0.0344616
NKIRAS1	1.90713e-06	-0.287219	0.042	0.071	0.0344694
VPS50	1.91298e-06	-0.769185	0.021	0.052	0.0345752
ITCH	1.92876e-06	-0.42881	0.057	0.099	0.0348605
MARF1	1.9371e-06	-0.303352	0.046	0.081	0.0350111
MFSD6	1.9385e-06	-0.441119	0.029	0.057	0.0350365
ZNF778	1.93917e-06	-0.28275	0.029	0.054	0.0350485
TAX1BP1	1.9411e-06	0.214001	0.144	0.161	0.0350835
GPCPD1	1.96343e-06	0.304319	0.103	0.112	0.0354871
KIAA1211	1.97028e-06	-0.508726	0.055	0.102	0.0356108
USP15	1.99193e-06	0.158725	0.099	0.12	0.0360021
LONRF2	2.00058e-06	-0.328824	0.09	0.14	0.0361586
JMJD1C	2.00185e-06	-0.705996	0.04	0.09	0.0361815
WDR60	2.00483e-06	0.107588	0.04	0.059	0.0362353
CDC37	2.00509e-06	0.264951	0.186	0.192	0.03624
MSTO1	2.02091e-06	0.111155	0.147	0.175	0.0365259
ZFP1	2.03803e-06	-0.182458	0.058	0.086	0.0368353
ARRB1	2.05267e-06	-0.500322	0.04	0.074	0.0371
SEC24A	2.05435e-06	0.199803	0.127	0.145	0.0371303
NCOA1	2.07232e-06	0.133712	0.072	0.093	0.0374552
SIKE1	2.0763e-06	0.172675	0.127	0.148	0.037527
SMURF2	2.10098e-06	-0.10022	0.053	0.08	0.0379731
LRCH4	2.10606e-06	0.248547	0.116	0.132	0.0380649
CRCP	2.11408e-06	-0.393882	0.065	0.104	0.0382098
RNF11	2.12414e-06	-0.147667	0.171	0.218	0.0383918
TNFRSF21	2.14454e-06	0.328999	0.066	0.076	0.0387605
TRIM27	2.15933e-06	-0.151394	0.095	0.134	0.0390277
METTL17	2.16168e-06	-0.31521	0.043	0.076	0.0390702
CACNB2	2.16423e-06	-0.66289	0.018	0.041	0.0391163
USP54	2.17605e-06	0.483043	0.066	0.065	0.0393299
DMAP1	2.20679e-06	0.284652	0.088	0.1	0.0398856
PDCD4	2.21026e-06	0.170943	0.157	0.176	0.0399482
SPNS2	2.21715e-06	0.441622	0.043	0.05	0.0400728
TBC1D14	2.25243e-06	0.359548	0.127	0.133	0.0407105
TOP3A	2.25478e-06	-0.201638	0.043	0.073	0.0407529
RIC3	2.25608e-06	0.215708	0.148	0.16	0.0407763
PCDH7	2.26106e-06	0.691973	0.046	0.039	0.0408664
UBE4A	2.27771e-06	0.112887	0.095	0.116	0.0411674
HUWE1	2.28132e-06	0.330157	0.098	0.111	0.0412326
ARHGAP1	2.29632e-06	-0.541065	0.043	0.083	0.0415037
SYNJ1	2.29802e-06	-0.18449	0.113	0.159	0.0415343
TRIB3	2.30225e-06	0.533439	0.118	0.109	0.0416109
SCFD1	2.31734e-06	0.112137	0.096	0.12	0.0418835
ARRB2	2.33783e-06	-0.380996	0.062	0.106	0.0422539
CYP20A1	2.3379e-06	0.11719	0.054	0.072	0.0422552
RPE	2.34691e-06	-0.126552	0.02	0.038	0.0424181
CGREF1	2.3507e-06	-0.563692	0.025	0.055	0.0424865
IFI27L1	2.35866e-06	0.15419	0.047	0.063	0.0426303
DENND11	2.36098e-06	-0.31504	0.066	0.107	0.0426723
CHKA	2.37053e-06	0.144885	0.073	0.096	0.0428449
MCMBP	2.37219e-06	0.119364	0.122	0.143	0.042875
POGZ	2.38363e-06	-0.250115	0.119	0.173	0.0430818
SLC30A6	2.40453e-06	0.140419	0.042	0.06	0.0434596
TMEM208	2.40485e-06	0.166419	0.128	0.15	0.0434653
CCDC7	2.43554e-06	-0.115	0.042	0.065	0.04402
RPUSD4	2.46751e-06	0.186587	0.039	0.052	0.0445978
KLF12	2.47887e-06	-0.67904	0.048	0.101	0.0448031
KLHDC8A	2.48351e-06	-0.718288	0.027	0.066	0.0448869
BCLAF3	2.50807e-06	0.390698	0.089	0.095	0.0453308
UBXN6	2.51426e-06	0.218319	0.155	0.173	0.0454428
MOAP1	2.51592e-06	0.102607	0.162	0.19	0.0454728
RAPGEF2	2.5335e-06	0.283945	0.125	0.131	0.0457905
GATC	2.54574e-06	-1.1311	0.02	0.047	0.0460117
SLC25A46	2.5679e-06	0.258169	0.12	0.121	0.0464122
SPOCK2	2.57252e-06	-0.442578	0.098	0.148	0.0464957
MYO9A	2.58217e-06	0.274211	0.081	0.096	0.0466701
COQ7	2.58554e-06	-0.345041	0.04	0.069	0.046731
HNRNPH2	2.59875e-06	-0.280356	0.052	0.084	0.0469699
CSDC2	2.60041e-06	-0.786373	0.032	0.07	0.0469999
AGL	2.62527e-06	-0.635888	0.026	0.055	0.0474492
ADCYAP1R1	2.62728e-06	-0.233914	0.039	0.071	0.0474855
ATP5PD	2.63732e-06	-0.384253	0.052	0.091	0.047667
SRPK2	2.64999e-06	-0.419154	0.081	0.135	0.0478959
SLC25A1	2.67065e-06	-0.187127	0.076	0.113	0.0482693
RTN2	2.67104e-06	-0.16498	0.062	0.093	0.0482764
ZNF337	2.67823e-06	0.224059	0.106	0.121	0.0484063
CNN2	2.69449e-06	0.477398	0.079	0.077	0.0487003
DDX39B	2.70758e-06	-0.130431	0.086	0.12	0.0489369
MEGF9	2.71102e-06	-0.385123	0.049	0.086	0.048999
TSNAX	2.73404e-06	0.119881	0.07	0.092	0.0494151
KLHL28	2.74749e-06	-0.299033	0.039	0.073	0.0496581
FAM107A	2.75155e-06	-1.37956	0.012	0.039	0.0497315
AGO4	2.76448e-06	0.299785	0.079	0.093	0.0499653

## Sheet: HET_MGE_Mig-VS-Stat
	p_val	avg_log2FC	pct.1	pct.2	p_val_adj
NNAT	7.86252e-223	-1.11364	0.757	0.937	1.42052e-218
MEIS2	3.64072e-195	2.88764	0.3	0.055	6.57769e-191
PEG10	3.6951e-173	-1.00887	0.677	0.886	6.67594e-169
LHX8	1.51911e-142	-1.5057	0.22	0.561	2.74457e-138
NKX2-1	9.63386e-115	-2.06388	0.077	0.347	1.74055e-110
CRABP1	2.93328e-88	-1.30736	0.249	0.493	5.29956e-84
MEST	4.5848e-78	-0.692151	0.688	0.865	8.28336e-74
ACTB	3.48839e-77	-0.627135	0.685	0.864	6.30248e-73
ZIC1	8.19938e-74	-1.1391	0.191	0.437	1.48138e-69
ENC1	2.44411e-71	-1.0955	0.358	0.601	4.41578e-67
LSAMP	1.63636e-66	-0.909775	0.163	0.382	2.95642e-62
SESN3	4.73046e-61	-1.19073	0.094	0.276	8.54652e-57
LHX6	8.05069e-60	-1.63761	0.071	0.245	1.45452e-55
TMSB4X	1.18748e-59	-0.458236	0.743	0.879	2.14542e-55
SOX2	4.42653e-59	-1.35893	0.11	0.307	7.9974e-55
PTPRS	8.674e-59	-0.636081	0.425	0.658	1.56713e-54
SOX4	1.20341e-56	-0.4828	0.538	0.745	2.1742e-52
ABAT	3.62057e-56	-0.628288	0.219	0.42	6.54128e-52
TUBB2B	5.95248e-56	-0.274943	0.844	0.915	1.07543e-51
TUBA1A	2.69275e-54	-0.484423	0.481	0.684	4.86498e-50
NCAM1	7.06703e-52	-0.594963	0.397	0.62	1.2768e-47
GAD1	1.87005e-51	-0.759244	0.237	0.432	3.37862e-47
MAPK8IP1	4.60563e-51	-0.683422	0.193	0.381	8.32099e-47
FTL	2.58566e-50	0.545628	0.555	0.518	4.67151e-46
OTX2	7.2312e-50	-1.35015	0.046	0.176	1.30646e-45
MAP2	2.49998e-49	-0.569727	0.515	0.73	4.51672e-45
AFF2	3.04376e-49	-0.680365	0.278	0.487	5.49916e-45
MARCKSL1	3.16691e-49	-0.578863	0.593	0.79	5.72166e-45
CNIH2	5.97279e-49	-0.540512	0.252	0.446	1.0791e-44
SYT1	3.82729e-48	-0.605663	0.218	0.402	6.91476e-44
UBE2E3	4.24712e-47	-0.851963	0.188	0.376	7.67326e-43
ECEL1	4.73883e-47	-0.82128	0.172	0.345	8.56164e-43
CDKN1A	2.03259e-46	0.880154	0.374	0.265	3.67228e-42
GNG2	1.81399e-45	-0.639207	0.282	0.482	3.27733e-41
TRIM2	2.58216e-45	-0.461012	0.237	0.406	4.66518e-41
EFNB3	4.57512e-45	-0.707314	0.173	0.345	8.26588e-41
SEC31A	1.43615e-44	0.527082	0.539	0.489	2.59469e-40
LMO3	1.53349e-44	-0.868291	0.19	0.379	2.77056e-40
ETFB	1.56505e-44	0.680808	0.282	0.258	2.82758e-40
ZNF462	2.21533e-44	-0.764799	0.145	0.308	4.00245e-40
GRIK3	8.18517e-44	-0.787624	0.155	0.324	1.47881e-39
GABBR1	1.11195e-43	-0.478353	0.225	0.388	2.00896e-39
SPARCL1	2.05915e-43	-3.75538	0.003	0.083	3.72027e-39
SFTA3	2.19316e-43	-1.94199	0.025	0.132	3.96239e-39
FGF14	4.46131e-43	-0.92064	0.101	0.244	8.06024e-39
ACTG1	5.71226e-43	-0.387576	0.607	0.784	1.03203e-38
SST	1.10638e-42	-1.80982	0.054	0.19	1.9989e-38
SEPTIN5	1.22015e-42	-0.416405	0.251	0.423	2.20445e-38
KIF21B	2.6831e-42	-0.627073	0.247	0.431	4.84756e-38
TUBB2A	3.09873e-42	-0.413276	0.373	0.561	5.59848e-38
DDIT3	3.60302e-42	0.943427	0.275	0.178	6.50957e-38
TLE5	1.17968e-41	-0.848098	0.155	0.323	2.13133e-37
MARCKS	2.2855e-41	-0.406616	0.479	0.672	4.12921e-37
GBX2	3.5516e-41	-1.56309	0.038	0.148	6.41667e-37
ROBO3	3.94882e-41	-1.00452	0.091	0.226	7.13432e-37
ADGRV1	7.12758e-41	-1.2237	0.069	0.204	1.28774e-36
MT-ATP6	1.15693e-40	-0.464329	0.794	0.897	2.09022e-36
CTXN1	1.65123e-40	-0.551685	0.29	0.479	2.98327e-36
NDUFA4	1.8028e-40	0.392178	0.511	0.52	3.25712e-36
TUBB	9.44279e-40	-0.490142	0.157	0.298	1.70603e-35
ALKBH5	1.09057e-39	0.580563	0.34	0.304	1.97034e-35
APC	1.37214e-39	-0.567357	0.173	0.327	2.47905e-35
TNFRSF10B	1.71768e-39	0.820887	0.266	0.202	3.10334e-35
NRXN2	2.40564e-39	-0.510016	0.21	0.363	4.34627e-35
ARF1	6.348e-39	0.432931	0.44	0.434	1.14689e-34
TRAP1	1.32875e-38	0.495258	0.278	0.275	2.40065e-34
ANK3	2.09403e-38	-0.50392	0.162	0.302	3.78329e-34
SLC6A1	2.12442e-38	-0.435178	0.144	0.279	3.83819e-34
CD200	2.22376e-38	-0.489772	0.183	0.33	4.01767e-34
PHPT1	2.25164e-38	0.378943	0.495	0.504	4.06804e-34
CRMP1	2.66487e-38	-0.351938	0.489	0.671	4.81462e-34
ISLR2	3.27923e-38	0.693426	0.336	0.275	5.92458e-34
SEZ6L	3.43901e-38	-0.82674	0.106	0.235	6.21326e-34
SPARC	3.53129e-38	-1.34359	0.087	0.229	6.37997e-34
ATP9A	7.04145e-38	-0.520712	0.208	0.365	1.27218e-33
MAP1LC3B	8.23614e-38	0.634289	0.42	0.345	1.48802e-33
CALM2	8.77526e-38	-0.521217	0.223	0.385	1.58543e-33
ELAVL2	1.00014e-37	-0.602273	0.194	0.352	1.80696e-33
PTPRO	1.01629e-37	-1.00584	0.06	0.173	1.83613e-33
NSG1	2.18375e-37	-0.453575	0.312	0.49	3.94539e-33
GPC2	1.12102e-36	-0.562597	0.234	0.391	2.02535e-32
SOX6	1.14594e-36	-1.4832	0.043	0.154	2.07038e-32
DCLK2	3.34112e-36	-0.521939	0.303	0.48	6.03641e-32
RTN1	3.54629e-36	-0.434953	0.423	0.598	6.40707e-32
P4HB	6.52373e-36	0.775991	0.266	0.195	1.17864e-31
SCD5	6.9604e-36	-0.428062	0.149	0.28	1.25754e-31
DLX2	7.80543e-36	-0.792284	0.114	0.251	1.41021e-31
PAX6	8.58482e-36	2.50265	0.065	0.013	1.55102e-31
PJA2	9.25364e-36	0.367432	0.695	0.69	1.67186e-31
SLC4A7	1.41376e-35	0.450995	0.532	0.517	2.55424e-31
NREP	1.81261e-35	-0.412797	0.573	0.739	3.27484e-31
KIF5A	2.56914e-35	-0.658017	0.156	0.3	4.64167e-31
MLLT11	3.20994e-35	-0.418446	0.536	0.72	5.7994e-31
NOVA1	7.79135e-35	-0.471341	0.206	0.357	1.40766e-30
SFRP1	1.16502e-34	1.77759	0.104	0.044	2.10485e-30
ARF4	1.42563e-34	0.546456	0.476	0.398	2.57569e-30
SLC2A1	1.66606e-34	0.719478	0.238	0.206	3.01007e-30
HSPA5	1.90242e-34	0.708347	0.2	0.175	3.4371e-30
PER1	1.94513e-34	0.992173	0.207	0.141	3.51426e-30
PCBP4	2.6963e-34	-0.496677	0.185	0.327	4.87141e-30
CCDC88A	3.05638e-34	-0.37125	0.248	0.395	5.52196e-30
WNK2	3.64053e-34	-0.541899	0.133	0.254	6.57735e-30
FRMD4A	7.83148e-34	-0.635075	0.106	0.224	1.41491e-29
GPC1	8.05363e-34	-0.433984	0.21	0.348	1.45505e-29
DCLK1	8.34914e-34	-0.449925	0.206	0.355	1.50844e-29
DCTN1	9.62428e-34	-0.253166	0.296	0.439	1.73882e-29
APC2	1.30208e-33	-0.336825	0.222	0.357	2.35246e-29
CELF5	1.30803e-33	-0.527758	0.182	0.324	2.36322e-29
VCAN	1.39062e-33	0.571172	0.2	0.198	2.51243e-29
KIF1B	1.66737e-33	-0.285492	0.313	0.466	3.01244e-29
HES5	1.67685e-33	-1.4044	0.111	0.259	3.02956e-29
SLIT1	1.76859e-33	-0.622502	0.125	0.245	3.19532e-29
FAM171A2	3.06645e-33	-0.396677	0.188	0.317	5.54016e-29
GNL3	3.34087e-33	0.701039	0.264	0.228	6.03595e-29
EPHB1	3.35139e-33	-1.11695	0.049	0.152	6.05496e-29
LY6H	3.81873e-33	-0.633595	0.164	0.3	6.8993e-29
TNC	4.35225e-33	-2.28206	0.02	0.109	7.86321e-29
CADM1	4.50168e-33	-0.508613	0.343	0.514	8.13318e-29
CTNNA2	6.69167e-33	-0.939627	0.079	0.196	1.20898e-28
GFPT1	7.3664e-33	0.545362	0.329	0.289	1.33089e-28
NUDT21	8.39064e-33	0.446684	0.31	0.306	1.51594e-28
NDN	8.42028e-33	-0.47448	0.185	0.322	1.52129e-28
DCX	1.83952e-32	-0.172311	0.766	0.858	3.32346e-28
GOLT1B	3.26568e-32	0.612942	0.269	0.237	5.90011e-28
C12orf57	3.67093e-32	0.392387	0.504	0.501	6.63226e-28
SLC3A2	4.08033e-32	0.519392	0.402	0.355	7.37192e-28
RAB3C	5.59517e-32	-0.419271	0.147	0.265	1.01088e-27
SMARCA4	5.98212e-32	-0.396884	0.317	0.484	1.08079e-27
SEC61A1	7.0294e-32	0.480667	0.35	0.321	1.27e-27
NRXN3	7.12994e-32	-0.723067	0.079	0.185	1.28817e-27
ZNF711	7.65942e-32	-0.486638	0.153	0.273	1.38383e-27
BNIP3L	7.9073e-32	0.343866	0.55	0.564	1.42861e-27
SDC3	9.54705e-32	-0.408793	0.281	0.44	1.72487e-27
TRIB2	9.55534e-32	-0.347438	0.222	0.366	1.72636e-27
BSCL2	1.00434e-31	0.385218	0.374	0.374	1.81453e-27
CMIP	1.34753e-31	-0.352845	0.255	0.405	2.43458e-27
ACTR1A	1.50758e-31	-0.353028	0.192	0.316	2.72375e-27
AKT1	1.52428e-31	-0.464903	0.177	0.306	2.75392e-27
PTPRZ1	1.53016e-31	-0.787314	0.101	0.224	2.76454e-27
BTBD17	2.24594e-31	-1.46006	0.043	0.139	4.05773e-27
RBFOX2	2.41335e-31	-0.294023	0.356	0.516	4.3602e-27
DBN1	2.5128e-31	-0.383987	0.216	0.353	4.53987e-27
LRIF1	2.96747e-31	0.749357	0.197	0.155	5.36133e-27
MACF1	3.59364e-31	-0.366471	0.194	0.324	6.49264e-27
CDH2	3.61121e-31	-0.369466	0.22	0.358	6.52436e-27
APBB3	4.15364e-31	0.544617	0.302	0.279	7.50438e-27
RNF187	4.23353e-31	0.371661	0.398	0.41	7.64872e-27
MFSD2A	4.37069e-31	1.07187	0.167	0.1	7.89653e-27
ANAPC11	5.27284e-31	0.299934	0.396	0.412	9.52644e-27
HSP90AB1	5.73962e-31	0.255299	0.456	0.499	1.03698e-26
ANO8	5.88968e-31	-0.337643	0.21	0.329	1.06409e-26
SP8	6.17755e-31	2.78556	0.049	0.008	1.1161e-26
DPYSL5	6.34802e-31	-0.469221	0.388	0.562	1.1469e-26
EIF1	6.47675e-31	0.467661	0.462	0.442	1.17015e-26
ZNF362	8.69165e-31	-0.398907	0.101	0.197	1.57032e-26
C14orf132	1.50063e-30	-0.556926	0.115	0.228	2.7112e-26
HDGFL3	1.60359e-30	-0.114953	0.302	0.415	2.8972e-26
DIPK1B	1.66466e-30	-0.384159	0.132	0.23	3.00754e-26
APEX1	1.75726e-30	-0.377364	0.182	0.308	3.17484e-26
IRF2BPL	1.76907e-30	-0.649407	0.091	0.196	3.19618e-26
CELF2	1.79975e-30	-0.400793	0.215	0.35	3.25161e-26
NCAN	1.81673e-30	-0.304138	0.186	0.313	3.28229e-26
SCD	1.82889e-30	0.450754	0.414	0.423	3.30425e-26
C1orf61	1.94021e-30	-1.33825	0.057	0.168	3.50538e-26
VAMP2	2.04047e-30	0.468359	0.503	0.481	3.68651e-26
RO60	2.10797e-30	0.175137	0.306	0.365	3.80846e-26
DLG4	2.35811e-30	-0.280561	0.345	0.493	4.26039e-26
TANC2	2.73188e-30	-0.332489	0.199	0.317	4.93569e-26
WDR26	2.77423e-30	0.101541	0.289	0.361	5.01219e-26
TMSB15A	2.98771e-30	-0.359406	0.272	0.419	5.3979e-26
DCC	3.35022e-30	-0.56263	0.133	0.246	6.05284e-26
CKB	3.86809e-30	-0.524785	0.511	0.689	6.98848e-26
EIF4EBP2	4.13023e-30	-0.348132	0.263	0.401	7.46209e-26
CELF3	4.25508e-30	-0.312601	0.454	0.62	7.68765e-26
STMN1	4.52227e-30	-0.257579	0.138	0.241	8.17038e-26
GORASP2	4.60399e-30	0.541897	0.251	0.231	8.31803e-26
NUDT3	4.65172e-30	-0.302829	0.32	0.474	8.40426e-26
PAM	4.74907e-30	-0.792477	0.111	0.231	8.58014e-26
ZMIZ2	5.09472e-30	-0.259502	0.215	0.331	9.20464e-26
CADM4	5.90843e-30	-0.388028	0.285	0.437	1.06748e-25
CLU	6.42582e-30	0.619553	0.235	0.207	1.16095e-25
DDAH2	7.40565e-30	0.184835	0.302	0.367	1.33798e-25
TTYH1	7.43081e-30	-0.679407	0.174	0.318	1.34252e-25
MBIP	7.65075e-30	-0.719479	0.11	0.224	1.38226e-25
ARHGEF12	7.74276e-30	-0.569729	0.154	0.279	1.39888e-25
NYAP1	9.474e-30	-0.365212	0.117	0.211	1.71167e-25
LRCH2	1.06917e-29	-0.46503	0.134	0.244	1.93166e-25
SREBF2	1.17483e-29	-0.167019	0.222	0.338	2.12256e-25
PAFAH1B1	1.33107e-29	-0.293589	0.365	0.518	2.40484e-25
COX7A2L	1.43197e-29	0.370045	0.403	0.403	2.58713e-25
JPT1	1.50047e-29	-0.277617	0.172	0.281	2.71089e-25
PTN	1.77973e-29	-0.5441	0.095	0.199	3.21543e-25
CHPF	1.81125e-29	0.658655	0.277	0.226	3.27239e-25
STMN2	1.81636e-29	-0.238368	0.578	0.708	3.28162e-25
HNRNPL	1.88688e-29	-0.28542	0.19	0.304	3.40903e-25
JUND	2.06722e-29	0.203519	0.458	0.516	3.73484e-25
SPCS1	2.08501e-29	0.337154	0.315	0.33	3.76698e-25
CLASP2	2.11952e-29	-0.133481	0.383	0.521	3.82934e-25
CAND1	2.39071e-29	0.117922	0.374	0.45	4.3193e-25
CADM3	2.82902e-29	-0.293768	0.183	0.297	5.11119e-25
PPDPF	2.88226e-29	0.326297	0.465	0.503	5.20738e-25
STT3A	3.07435e-29	0.537708	0.333	0.29	5.55443e-25
NDRG4	4.84483e-29	-0.160094	0.294	0.417	8.75315e-25
PPP2R2B	5.17121e-29	-0.570067	0.107	0.211	9.34282e-25
FZD3	5.48654e-29	-0.423451	0.159	0.27	9.91253e-25
EMD	5.50121e-29	0.526836	0.333	0.306	9.93904e-25
NAP1L3	6.02113e-29	-0.186193	0.209	0.316	1.08784e-24
B4GALNT4	6.43131e-29	-0.365452	0.228	0.361	1.16194e-24
SFXN1	6.68821e-29	0.184675	0.286	0.339	1.20836e-24
MTA1	6.97852e-29	-0.278238	0.171	0.28	1.26081e-24
AMOT	7.12204e-29	-0.996254	0.043	0.129	1.28674e-24
XAB2	8.21292e-29	0.507461	0.171	0.166	1.48383e-24
TCAF1	8.37665e-29	-0.452301	0.157	0.272	1.51341e-24
CORO2B	8.67626e-29	-0.542968	0.126	0.243	1.56754e-24
OCIAD2	9.72498e-29	-0.759306	0.107	0.22	1.75701e-24
MDM4	1.00858e-28	0.305903	0.338	0.37	1.8222e-24
EIF4G2	1.07109e-28	-0.71611	0.1	0.208	1.93514e-24
LHFPL6	1.12536e-28	-0.652412	0.087	0.187	2.03319e-24
STMN3	1.14982e-28	-0.584511	0.153	0.274	2.07737e-24
CCPG1	1.16527e-28	0.663781	0.245	0.205	2.10529e-24
FOXG1	1.20229e-28	-0.387473	0.282	0.434	2.17218e-24
PTOV1	1.20443e-28	-0.378045	0.363	0.528	2.17604e-24
MGST3	1.20523e-28	0.285194	0.274	0.298	2.17748e-24
PRKACB	1.28717e-28	-0.108228	0.224	0.325	2.32553e-24
RAB3B	1.42811e-28	-0.68713	0.063	0.152	2.58017e-24
TTYH3	1.49574e-28	-0.136198	0.229	0.328	2.70235e-24
SCARB2	1.54307e-28	0.192162	0.276	0.326	2.78786e-24
TRA2A	1.71223e-28	-0.239923	0.3	0.43	3.09348e-24
ATF5	1.8685e-28	0.809201	0.204	0.152	3.37582e-24
C4orf48	1.94989e-28	-0.307829	0.197	0.311	3.52287e-24
SCN3A	2.19382e-28	-0.504816	0.142	0.254	3.96358e-24
ETNK1	2.28906e-28	-0.248985	0.196	0.306	4.13565e-24
RNF165	2.48276e-28	-0.225865	0.186	0.291	4.48559e-24
CALM3	2.81035e-28	-0.11242	0.347	0.471	5.07747e-24
CASK	2.91936e-28	-0.137198	0.283	0.394	5.2744e-24
LITAF	3.00706e-28	-1.93642	0.018	0.092	5.43286e-24
HIST1H2AE	3.30086e-28	-0.997664	0.087	0.202	5.96367e-24
KDM1A	3.38922e-28	-0.218957	0.192	0.292	6.1233e-24
ENAH	3.41024e-28	-0.242927	0.275	0.406	6.16128e-24
ASIC1	3.52676e-28	-0.598263	0.114	0.227	6.37181e-24
MDM2	3.61675e-28	0.437439	0.255	0.247	6.53439e-24
DST	4.19385e-28	-0.364777	0.141	0.24	7.57702e-24
TSHZ2	4.83409e-28	-0.891363	0.058	0.149	8.73375e-24
YWHAH	5.05344e-28	-0.534134	0.101	0.196	9.13004e-24
CANX	5.4219e-28	0.441062	0.227	0.229	9.79574e-24
CAMK2N1	5.72765e-28	-0.331293	0.206	0.336	1.03481e-23
KDM3A	5.94755e-28	0.36667	0.327	0.326	1.07454e-23
CIB1	5.9751e-28	0.963261	0.174	0.109	1.07952e-23
MAPK1	6.06158e-28	-0.258627	0.136	0.227	1.09515e-23
PIK3R3	6.20006e-28	-0.444129	0.161	0.281	1.12016e-23
NME4	6.86657e-28	-0.542701	0.073	0.158	1.24058e-23
ALG13	7.60023e-28	0.335238	0.333	0.34	1.37313e-23
IP6K2	8.10832e-28	-0.381339	0.17	0.281	1.46493e-23
GAP43	8.6226e-28	-0.383679	0.272	0.408	1.55785e-23
SLIT2	8.67999e-28	-1.30493	0.032	0.109	1.56821e-23
DICER1	9.16092e-28	-0.175128	0.2	0.291	1.6551e-23
SLC16A3	9.85278e-28	0.814393	0.199	0.149	1.7801e-23
CENPV	1.0054e-27	-0.293697	0.174	0.277	1.81645e-23
COG3	1.03898e-27	0.466906	0.278	0.26	1.87712e-23
OCIAD1	1.06974e-27	0.293442	0.438	0.456	1.93271e-23
PLXNA4	1.13901e-27	-0.512647	0.122	0.23	2.05786e-23
ATAD1	1.24521e-27	0.373286	0.309	0.319	2.24973e-23
TAGLN3	1.32376e-27	-0.348777	0.161	0.263	2.39164e-23
VAT1	1.34353e-27	-0.502427	0.183	0.303	2.42736e-23
CADPS	1.64999e-27	-0.410671	0.154	0.263	2.98105e-23
SFPQ	1.6808e-27	-0.142198	0.18	0.267	3.03671e-23
SELENOW	1.69831e-27	-0.105437	0.32	0.44	3.06833e-23
SGTA	1.70176e-27	0.381296	0.264	0.272	3.07457e-23
RADX	1.77114e-27	-1.29479	0.052	0.148	3.19991e-23
TMEM178B	2.24632e-27	-0.537932	0.19	0.321	4.05843e-23
PRKAB1	2.33903e-27	0.495991	0.229	0.219	4.22593e-23
NOL4	2.43712e-27	-0.93177	0.062	0.16	4.40314e-23
NPRL2	2.50248e-27	0.620322	0.188	0.165	4.52122e-23
SRGAP3	2.84949e-27	-0.119379	0.144	0.226	5.14817e-23
RFX3	2.94271e-27	-0.158272	0.144	0.221	5.31659e-23
RNMT	3.12002e-27	0.500188	0.274	0.255	5.63694e-23
ARIH1	3.18681e-27	0.358657	0.277	0.289	5.75761e-23
PCGF2	3.21797e-27	-0.24238	0.165	0.268	5.8139e-23
NTRK3	3.53809e-27	-0.436981	0.104	0.201	6.39226e-23
UBE2I	3.66959e-27	-0.145388	0.251	0.35	6.62986e-23
INA	3.71524e-27	-0.39659	0.32	0.476	6.71232e-23
CTNNBIP1	3.78809e-27	-0.503048	0.099	0.193	6.84394e-23
YWHAQ	3.83109e-27	-0.241795	0.292	0.425	6.92164e-23
ADD2	3.90866e-27	-0.428958	0.151	0.261	7.06177e-23
CPEB4	4.17824e-27	0.314435	0.267	0.295	7.54882e-23
C1orf52	4.21971e-27	0.596723	0.185	0.177	7.62375e-23
URI1	4.42041e-27	0.149681	0.219	0.271	7.98636e-23
STK25	4.536e-27	-0.140807	0.189	0.274	8.1952e-23
DOK6	4.5556e-27	-0.658724	0.07	0.155	8.23061e-23
AGAP2	4.66903e-27	-0.452621	0.189	0.31	8.43553e-23
2024-03-06	4.94474e-27	-0.257825	0.333	0.466	8.93366e-23
MAP7D1	4.99525e-27	-0.282988	0.214	0.32	9.02493e-23
NHP2	5.02189e-27	0.278988	0.375	0.401	9.07304e-23
NMNAT2	5.11299e-27	-0.328496	0.226	0.347	9.23764e-23
RUNDC3A	5.2499e-27	-0.190804	0.173	0.259	9.485e-23
TOX3	5.3542e-27	-1.26958	0.039	0.12	9.67343e-23
GRIN2B	5.50832e-27	-0.601848	0.069	0.156	9.95189e-23
GDI1	5.77311e-27	-0.244993	0.423	0.579	1.04303e-22
TOX	5.84796e-27	-0.525353	0.079	0.166	1.05655e-22
ANKRD13B	6.34892e-27	-0.231938	0.122	0.213	1.14706e-22
NEDD4L	6.76456e-27	-0.235572	0.202	0.312	1.22215e-22
LAPTM4B	6.96506e-27	0.292869	0.301	0.331	1.25838e-22
PRXL2A	7.89001e-27	-0.229081	0.212	0.314	1.42549e-22
SMARCA1	8.42488e-27	-0.423746	0.114	0.203	1.52212e-22
LRRC4B	8.80179e-27	-0.199191	0.331	0.46	1.59022e-22
RNH1	8.86847e-27	0.4828	0.213	0.209	1.60227e-22
DPYSL4	8.91405e-27	-0.10676	0.234	0.331	1.6105e-22
PLEKHO1	9.14668e-27	-0.177979	0.124	0.2	1.65253e-22
CDS2	9.18115e-27	-0.121565	0.159	0.241	1.65876e-22
ERO1A	9.18168e-27	0.404603	0.278	0.28	1.65885e-22
YIPF4	9.28575e-27	0.302901	0.245	0.267	1.67766e-22
VAT1L	9.61203e-27	-0.399489	0.113	0.21	1.73661e-22
MAP6	1.02247e-26	-0.333786	0.299	0.436	1.84729e-22
COPB1	1.02592e-26	0.405439	0.376	0.359	1.85353e-22
GPR107	1.03226e-26	0.367302	0.329	0.325	1.86498e-22
EPN1	1.03969e-26	0.227848	0.331	0.371	1.87841e-22
CORO1C	1.05124e-26	-0.16042	0.223	0.33	1.89927e-22
PLEKHA5	1.09448e-26	-0.732151	0.116	0.233	1.9774e-22
YWHAE	1.17906e-26	-0.115493	0.32	0.437	2.13021e-22
DIPK2A	1.19557e-26	-1.01859	0.064	0.161	2.16003e-22
ZSWIM5	1.32154e-26	-0.723761	0.062	0.153	2.38762e-22
PTTG1IP	1.343e-26	-0.186058	0.213	0.305	2.42639e-22
SMS	1.4647e-26	0.281274	0.248	0.288	2.64628e-22
GPSM1	1.47312e-26	-0.218222	0.151	0.239	2.66148e-22
FARSB	1.52844e-26	0.380306	0.281	0.291	2.76144e-22
EMC10	1.6089e-26	-0.41965	0.243	0.373	2.9068e-22
AMER2	1.80293e-26	-0.558361	0.082	0.174	3.25736e-22
GPX4	1.89591e-26	0.2266	0.448	0.48	3.42534e-22
DNMT3A	1.93673e-26	-0.331038	0.161	0.266	3.49909e-22
MLF2	1.98518e-26	0.259355	0.345	0.367	3.58663e-22
SEC63	2.12442e-26	0.373848	0.265	0.263	3.83818e-22
PSMD13	2.14737e-26	0.430766	0.281	0.281	3.87965e-22
SLC4A8	2.26602e-26	-0.371477	0.171	0.281	4.09402e-22
SCAF8	2.52698e-26	0.29225	0.191	0.222	4.5655e-22
SNU13	2.59821e-26	0.312285	0.437	0.457	4.69418e-22
DCHS1	2.64426e-26	-0.336997	0.147	0.244	4.77739e-22
SMARCB1	2.71546e-26	-0.21715	0.172	0.266	4.90603e-22
METTL9	2.76732e-26	-0.363603	0.193	0.308	4.99972e-22
TUB	2.85352e-26	-0.370636	0.159	0.271	5.15545e-22
LCOR	2.87411e-26	-0.242688	0.259	0.374	5.19265e-22
REEP1	2.90116e-26	-0.274018	0.16	0.261	5.24152e-22
GABARAP	2.96725e-26	0.205471	0.289	0.341	5.36093e-22
TNIK	3.15997e-26	-0.33677	0.177	0.284	5.70911e-22
FADS1	3.68538e-26	0.171787	0.316	0.362	6.65838e-22
CHL1	3.68586e-26	-0.686655	0.091	0.189	6.65924e-22
FUS	4.43525e-26	-0.217903	0.21	0.302	8.01317e-22
CNOT9	4.48251e-26	0.412167	0.257	0.265	8.09856e-22
WDR6	5.38066e-26	-0.307636	0.191	0.292	9.72124e-22
MT-ND1	5.62637e-26	0.178542	0.546	0.6	1.01652e-21
RCN1	5.67092e-26	0.732061	0.153	0.124	1.02457e-21
ZEB1	5.81815e-26	0.193947	0.147	0.186	1.05116e-21
TMF1	5.94307e-26	0.502094	0.284	0.261	1.07373e-21
GBX1	6.05635e-26	-1.08949	0.054	0.139	1.0942e-21
HIST1H1B	6.22456e-26	-1.56606	0.05	0.15	1.12459e-21
GRIPAP1	6.39346e-26	-0.24152	0.14	0.223	1.15511e-21
PLPPR3	6.605e-26	-0.372921	0.258	0.391	1.19333e-21
DARS	6.62869e-26	0.24747	0.188	0.213	1.19761e-21
DGUOK	6.6614e-26	0.33417	0.344	0.349	1.20351e-21
NRCAM	7.44967e-26	-0.37478	0.2	0.32	1.34593e-21
MAP4K4	7.97613e-26	-0.234563	0.278	0.402	1.44105e-21
MAPRE3	8.87534e-26	-0.216505	0.227	0.33	1.60351e-21
SDR39U1	9.68911e-26	0.22406	0.226	0.262	1.75053e-21
MSI2	9.96599e-26	-0.346964	0.231	0.355	1.80056e-21
CRIPT	1.11217e-25	0.292399	0.286	0.304	2.00937e-21
NARS	1.15387e-25	0.415773	0.274	0.272	2.08469e-21
H2AFY2	1.15621e-25	-0.386334	0.149	0.255	2.08892e-21
NRBP2	1.22213e-25	-0.42688	0.077	0.15	2.20802e-21
SEC11A	1.22756e-25	-0.22959	0.199	0.293	2.21784e-21
NEFL	1.27996e-25	0.839074	0.185	0.141	2.3125e-21
NOVA2	1.33148e-25	-0.251391	0.253	0.37	2.40559e-21
LLGL1	1.37658e-25	-0.283367	0.124	0.201	2.48706e-21
RERE	1.39976e-25	0.18003	0.368	0.418	2.52895e-21
PSMB1	1.42166e-25	0.245627	0.334	0.368	2.56851e-21
TMTC2	1.49008e-25	-0.450889	0.083	0.168	2.69213e-21
FAT3	1.57499e-25	-0.86073	0.049	0.129	2.84553e-21
ZFAND3	1.60883e-25	-0.31812	0.173	0.271	2.90667e-21
CXXC4	1.61062e-25	-0.368812	0.116	0.201	2.9099e-21
BET1L	1.66599e-25	0.554095	0.202	0.186	3.00994e-21
ERI3	1.75131e-25	0.204191	0.251	0.294	3.16409e-21
UFM1	1.7672e-25	0.40562	0.312	0.304	3.1928e-21
NAV1	1.80802e-25	-0.274958	0.152	0.247	3.26655e-21
SGCB	1.96891e-25	-0.26522	0.126	0.208	3.55723e-21
NFE2L1	2.01525e-25	0.240544	0.295	0.329	3.64095e-21
PKIA	2.10209e-25	-0.13458	0.266	0.381	3.79784e-21
CYB5R3	2.18498e-25	-0.191801	0.2	0.289	3.9476e-21
VKORC1	2.3292e-25	0.443506	0.187	0.191	4.20817e-21
PLTP	2.358e-25	0.703439	0.147	0.126	4.26021e-21
KCNH7	2.37732e-25	-1.04357	0.044	0.127	4.29511e-21
SRRM4	2.39435e-25	-0.750159	0.08	0.172	4.32588e-21
SOX9	2.43171e-25	-1.13322	0.048	0.137	4.39338e-21
RASAL2	2.63875e-25	-0.562145	0.077	0.163	4.76742e-21
TNKS2	2.73212e-25	0.408398	0.243	0.247	4.93613e-21
GNAI2	2.77928e-25	-0.262717	0.121	0.199	5.02133e-21
HM13	2.78059e-25	0.409555	0.339	0.318	5.02368e-21
UBA52	2.94583e-25	0.297397	0.456	0.476	5.32222e-21
EVL	2.96349e-25	-0.233719	0.467	0.617	5.35414e-21
TSPOAP1	3.01548e-25	-0.774326	0.064	0.149	5.44806e-21
PCSK1	3.03359e-25	-1.5647	0.032	0.111	5.4808e-21
HNRNPUL1	3.11233e-25	0.128108	0.276	0.337	5.62305e-21
NLK	3.18374e-25	-0.262021	0.274	0.392	5.75206e-21
CAPN7	3.30968e-25	0.529287	0.177	0.165	5.97959e-21
GNB1	3.84162e-25	-0.159729	0.342	0.463	6.94065e-21
HERPUD1	3.85257e-25	0.72789	0.176	0.139	6.96043e-21
NTRK2	3.92296e-25	-0.599848	0.085	0.174	7.08761e-21
NDUFS5	4.04958e-25	0.197722	0.21	0.247	7.31638e-21
G3BP2	4.21741e-25	0.22087	0.372	0.415	7.61959e-21
VAPA	4.43603e-25	0.469904	0.171	0.181	8.01458e-21
HNRNPA2B1	4.59154e-25	-0.405954	0.368	0.526	8.29554e-21
CCNG1	4.66356e-25	0.682849	0.176	0.154	8.42565e-21
NEGR1	4.69377e-25	-0.987669	0.044	0.128	8.48024e-21
MED10	4.80851e-25	0.411492	0.225	0.226	8.68753e-21
SOGA3	5.03328e-25	-0.22881	0.319	0.452	9.09362e-21
CTBP2	5.04932e-25	-0.669339	0.091	0.182	9.1226e-21
ZNRF1	5.09563e-25	-0.42272	0.177	0.295	9.20628e-21
ATRN	5.36074e-25	0.335121	0.196	0.213	9.68525e-21
CADM2	5.40628e-25	-0.962086	0.046	0.125	9.76752e-21
ATXN7L3B	5.47541e-25	-0.101143	0.334	0.441	9.89242e-21
OSBPL2	5.5658e-25	0.505105	0.237	0.217	1.00557e-20
GNAQ	5.60901e-25	-0.18941	0.197	0.291	1.01338e-20
WIZ	5.61552e-25	-0.283552	0.168	0.27	1.01456e-20
DTD1	5.69522e-25	-0.130245	0.214	0.303	1.02896e-20
CRIP2	5.73948e-25	-0.511293	0.112	0.209	1.03695e-20
NPEPL1	6.00019e-25	-0.343139	0.081	0.158	1.08405e-20
L1CAM	6.0663e-25	-0.256846	0.224	0.337	1.096e-20
SRRM1	6.40613e-25	0.135432	0.192	0.238	1.15739e-20
MAPK6	7.03111e-25	-0.214654	0.191	0.282	1.27031e-20
ANKRD11	7.38027e-25	0.395986	0.268	0.262	1.33339e-20
FNBP4	7.52436e-25	0.393321	0.228	0.234	1.35943e-20
SERINC1	7.61071e-25	0.264091	0.636	0.664	1.37503e-20
CTNND2	7.72023e-25	-0.332914	0.152	0.253	1.39481e-20
NTN1	7.86788e-25	-0.992522	0.044	0.12	1.42149e-20
EFR3B	7.97984e-25	-0.737142	0.086	0.179	1.44172e-20
SLC38A1	8.07435e-25	0.130176	0.316	0.379	1.45879e-20
VWA5A	9.05825e-25	-0.572197	0.118	0.217	1.63655e-20
ARCN1	9.64242e-25	0.312493	0.274	0.28	1.7421e-20
GRIA1	9.8928e-25	-0.344925	0.164	0.266	1.78733e-20
ELAVL4	1.01168e-24	-0.222947	0.158	0.249	1.82779e-20
DHX36	1.02003e-24	0.23395	0.332	0.379	1.84289e-20
PTBP3	1.03326e-24	-0.217243	0.172	0.262	1.8668e-20
RAB2A	1.07731e-24	0.191214	0.328	0.376	1.94638e-20
CNN3	1.13307e-24	-0.331755	0.2	0.313	2.04712e-20
LINGO1	1.18768e-24	-0.237449	0.241	0.349	2.14577e-20
TM2D3	1.2219e-24	0.169335	0.153	0.189	2.20761e-20
SRSF5	1.23784e-24	0.321014	0.208	0.237	2.23641e-20
DDX5	1.25747e-24	-0.203284	0.299	0.423	2.27188e-20
SMARCD1	1.27416e-24	-0.151955	0.173	0.255	2.30203e-20
PNMA1	1.3309e-24	-0.278548	0.22	0.324	2.40453e-20
SENP6	1.50829e-24	0.153502	0.368	0.422	2.72503e-20
GPR85	1.53043e-24	-0.492443	0.093	0.174	2.76503e-20
AEN	1.56962e-24	0.838105	0.146	0.113	2.83584e-20
ZNF536	1.64601e-24	-1.36227	0.03	0.1	2.97385e-20
ENO2	1.74466e-24	0.261809	0.704	0.721	3.15207e-20
ROMO1	1.7803e-24	0.189007	0.306	0.354	3.21647e-20
RNF130	1.80177e-24	-0.151394	0.168	0.248	3.25526e-20
NUP58	1.81538e-24	0.277945	0.278	0.302	3.27986e-20
MAPK10	1.84542e-24	-0.570246	0.166	0.29	3.33412e-20
DOCK4	1.92186e-24	-0.348571	0.103	0.189	3.47222e-20
TRAPPC3	1.92369e-24	0.193607	0.204	0.236	3.47552e-20
GALNTL6	1.96662e-24	-1.1541	0.021	0.083	3.5531e-20
NDUFAB1	2.03379e-24	0.153604	0.304	0.346	3.67444e-20
GOLM1	2.05142e-24	-0.362236	0.128	0.22	3.7063e-20
PFN1	2.06801e-24	0.217128	0.237	0.283	3.73627e-20
CNPY2	2.10775e-24	0.341807	0.216	0.222	3.80808e-20
ATAT1	2.20932e-24	-0.196544	0.307	0.428	3.99158e-20
HNRNPA0	2.24217e-24	-0.272161	0.283	0.404	4.05094e-20
RGMA	2.26583e-24	-0.160458	0.149	0.236	4.09367e-20
PHYHIPL	2.34717e-24	-0.613387	0.1	0.194	4.24063e-20
TOP2B	2.3949e-24	-0.202945	0.131	0.208	4.32686e-20
HK1	2.4435e-24	0.349655	0.212	0.225	4.41467e-20
H3F3A	2.46772e-24	-0.315852	0.479	0.636	4.45843e-20
PLXNA1	2.51316e-24	-0.548387	0.099	0.187	4.54053e-20
GPC3	2.60011e-24	-3.7718	0.003	0.053	4.69762e-20
PON2	2.61239e-24	-1.12369	0.028	0.092	4.71981e-20
MCF2L	2.84666e-24	-0.347929	0.21	0.328	5.14306e-20
ILF3	3.04218e-24	-0.356666	0.267	0.401	5.49631e-20
CAMK2N2	3.05438e-24	-0.258323	0.173	0.262	5.51835e-20
HIPK3	3.45411e-24	0.38995	0.263	0.285	6.24055e-20
TMEM41B	3.64403e-24	0.370289	0.235	0.237	6.58366e-20
EXOC7	3.78596e-24	-0.285035	0.171	0.264	6.84009e-20
HSPA9	3.82698e-24	0.501179	0.2	0.185	6.9142e-20
TMEM8B	3.86081e-24	0.131617	0.243	0.3	6.97533e-20
ANKRD12	3.9289e-24	0.173003	0.199	0.243	7.09835e-20
ZYX	3.9353e-24	0.417546	0.179	0.196	7.10991e-20
CSNK1E	4.15849e-24	-0.169691	0.275	0.385	7.51314e-20
CAMTA1	4.66951e-24	-0.279291	0.128	0.208	8.43641e-20
FARP1	4.81136e-24	-0.554858	0.144	0.253	8.69269e-20
POLDIP3	4.97793e-24	-0.153062	0.175	0.256	8.99363e-20
ARPC2	5.25009e-24	0.376081	0.19	0.194	9.48534e-20
DERL1	5.50564e-24	0.339904	0.192	0.209	9.94704e-20
MYL6	5.76711e-24	-0.200365	0.32	0.443	1.04194e-19
TMEM33	6.12909e-24	0.320901	0.294	0.305	1.10734e-19
TNPO3	6.21758e-24	0.285809	0.245	0.278	1.12333e-19
UNC50	6.34332e-24	0.206215	0.148	0.181	1.14605e-19
MEX3A	6.62087e-24	-0.262288	0.159	0.247	1.19619e-19
ZNF532	6.91641e-24	-0.103589	0.281	0.377	1.24959e-19
ESD	7.0338e-24	-0.36306	0.158	0.256	1.2708e-19
MDK	7.05262e-24	-0.325759	0.086	0.15	1.2742e-19
PRRC2B	7.09407e-24	-0.252294	0.216	0.317	1.28169e-19
COPG1	7.09984e-24	0.225104	0.384	0.415	1.28273e-19
NDUFV1	7.26646e-24	0.148164	0.237	0.278	1.31283e-19
ZFR	7.54919e-24	0.320112	0.22	0.247	1.36391e-19
ZCCHC17	8.40929e-24	0.316534	0.231	0.248	1.51931e-19
BIRC6	8.56519e-24	0.256277	0.272	0.301	1.54747e-19
C11orf96	8.94613e-24	-0.86371	0.079	0.176	1.6163e-19
TMX4	9.45289e-24	-0.22158	0.157	0.239	1.70785e-19
GNAO1	9.49775e-24	-0.15738	0.24	0.35	1.71596e-19
ODC1	9.68311e-24	0.178431	0.224	0.272	1.74945e-19
TMOD2	9.7949e-24	-0.336092	0.238	0.363	1.76964e-19
DNAJC3	9.92042e-24	0.787855	0.179	0.13	1.79232e-19
SH3GLB1	1.05486e-23	-0.131638	0.169	0.246	1.90581e-19
SELENOF	1.13551e-23	0.223517	0.253	0.28	2.05152e-19
DKK3	1.14951e-23	-0.284873	0.197	0.293	2.07682e-19
PAK3	1.24494e-23	-0.486839	0.097	0.186	2.24923e-19
SPAG9	1.25781e-23	-0.10188	0.34	0.449	2.27249e-19
CD276	1.28138e-23	-0.348924	0.147	0.238	2.31506e-19
TNXB	1.28184e-23	1.08959	0.132	0.091	2.3159e-19
RMND5A	1.28329e-23	0.402783	0.226	0.237	2.31852e-19
LBR	1.29794e-23	-0.141993	0.142	0.21	2.34499e-19
PCMT1	1.30929e-23	0.22472	0.252	0.282	2.3655e-19
BRD4	1.33428e-23	0.129027	0.226	0.279	2.41065e-19
UBQLN2	1.37212e-23	-0.212627	0.147	0.227	2.47901e-19
EDEM3	1.38089e-23	0.368076	0.208	0.22	2.49486e-19
LMNA	1.40888e-23	-0.190458	0.092	0.151	2.54543e-19
WSB2	1.41304e-23	-0.242171	0.206	0.309	2.55294e-19
PRDX2	1.44041e-23	-0.264979	0.476	0.627	2.60239e-19
GRAMD1A	1.54198e-23	-0.127196	0.122	0.198	2.7859e-19
FXYD6	1.55423e-23	-0.267669	0.571	0.719	2.80802e-19
TASOR	1.59751e-23	-0.227129	0.081	0.142	2.88622e-19
ALDH9A1	1.61435e-23	-0.725251	0.056	0.134	2.91664e-19
PRKAR2B	1.72058e-23	-0.423017	0.225	0.348	3.10857e-19
CSNK1D	1.73367e-23	-0.115192	0.188	0.269	3.13223e-19
ATP5MC2	1.73997e-23	-0.34398	0.11	0.191	3.14361e-19
RUFY3	1.7879e-23	-0.28175	0.286	0.411	3.2302e-19
DDX24	1.803e-23	0.137517	0.304	0.355	3.25748e-19
MOCS2	1.88062e-23	0.175873	0.16	0.197	3.39772e-19
SORBS2	1.88159e-23	-0.355992	0.076	0.146	3.39947e-19
PCDH17	1.9309e-23	-0.816517	0.044	0.113	3.48856e-19
KIDINS220	1.93953e-23	-0.144295	0.291	0.4	3.50415e-19
PTEN	1.96656e-23	-0.2337	0.159	0.241	3.55299e-19
OS9	1.97256e-23	-0.104008	0.209	0.287	3.56382e-19
WSB1	2.03695e-23	0.36331	0.795	0.793	3.68016e-19
NUFIP2	2.04097e-23	0.452067	0.24	0.233	3.68743e-19
DOT1L	2.05976e-23	-0.123415	0.168	0.243	3.72138e-19
EI24	2.07817e-23	0.220392	0.202	0.228	3.75462e-19
XKR4	2.1032e-23	-0.619665	0.062	0.138	3.79984e-19
RABAC1	2.11449e-23	0.249046	0.325	0.347	3.82025e-19
SMARCC2	2.19577e-23	-0.218468	0.202	0.305	3.9671e-19
PODXL2	2.25968e-23	-0.120081	0.222	0.315	4.08257e-19
BRSK1	2.28733e-23	-0.182596	0.393	0.522	4.13253e-19
DPYSL3	2.31817e-23	-0.25364	0.475	0.619	4.18824e-19
APMAP	2.33498e-23	0.221832	0.265	0.295	4.2186e-19
PPP2R5B	2.36733e-23	0.409949	0.284	0.277	4.27706e-19
RAB14	2.40351e-23	0.122238	0.274	0.323	4.34242e-19
ZNF146	2.43646e-23	0.419502	0.256	0.253	4.40195e-19
CPE	2.50593e-23	-0.278766	0.553	0.705	4.52746e-19
IMPDH2	2.57256e-23	0.4354	0.236	0.226	4.64784e-19
CHD5	2.61196e-23	-1.04203	0.03	0.093	4.71903e-19
BTG1	2.61224e-23	0.199643	0.292	0.333	4.71953e-19
CBX5	2.61226e-23	-0.173693	0.226	0.321	4.71956e-19
DDX1	2.61593e-23	0.10447	0.24	0.29	4.72621e-19
2024-03-05	2.69275e-23	-0.203877	0.138	0.212	4.86499e-19
CAMLG	2.72714e-23	0.281706	0.223	0.243	4.92713e-19
CHD4	2.73728e-23	0.120426	0.206	0.256	4.94545e-19
AKIRIN2	2.77326e-23	-0.194122	0.259	0.362	5.01045e-19
LRRC7	2.78037e-23	-0.401718	0.175	0.286	5.02329e-19
RNF7	2.78606e-23	0.260029	0.372	0.395	5.03358e-19
PIGQ	2.87499e-23	-0.226262	0.099	0.166	5.19425e-19
CHD2	2.88279e-23	0.259337	0.382	0.417	5.20834e-19
GPM6B	2.90515e-23	-0.137816	0.17	0.251	5.24874e-19
AASDHPPT	3.04245e-23	-0.165205	0.274	0.38	5.49679e-19
TCF4	3.04807e-23	-0.97852	0.049	0.13	5.50695e-19
AGAP1	3.18304e-23	-0.248743	0.276	0.39	5.75081e-19
RNF182	3.2286e-23	-1.96342	0.011	0.067	5.83312e-19
TCP1	3.584e-23	0.278815	0.238	0.251	6.47521e-19
SLC30A9	3.63652e-23	0.138519	0.21	0.252	6.5701e-19
LMO4	3.70411e-23	-0.391115	0.158	0.259	6.69222e-19
EIF4A1	3.87799e-23	0.1739	0.401	0.459	7.00637e-19
ZNF644	3.88497e-23	0.159395	0.376	0.43	7.01897e-19
KDM5B	3.88659e-23	0.179755	0.267	0.314	7.02191e-19
FNBP1L	3.9377e-23	-0.107831	0.254	0.355	7.11423e-19
RNF167	3.96395e-23	0.448356	0.23	0.222	7.16167e-19
ATP5F1B	3.9872e-23	0.228972	0.426	0.46	7.20368e-19
CUTA	4.0257e-23	0.181624	0.325	0.367	7.27323e-19
DHX9	4.13434e-23	-0.276727	0.238	0.346	7.46951e-19
AGFG1	4.40026e-23	0.17909	0.181	0.216	7.94995e-19
NPEPPS	4.4833e-23	-0.21327	0.165	0.252	8.09998e-19
WDR33	4.63268e-23	0.201371	0.284	0.319	8.36987e-19
PCNX3	4.64173e-23	0.529127	0.134	0.13	8.38621e-19
ETFA	4.71054e-23	0.332215	0.158	0.175	8.51054e-19
GABRB3	4.76552e-23	-0.273974	0.178	0.281	8.60987e-19
WNK1	4.87632e-23	-0.140447	0.23	0.322	8.81004e-19
PRKACA	4.97816e-23	0.197076	0.368	0.412	8.99405e-19
DLX1	5.0364e-23	-0.471752	0.082	0.163	9.09926e-19
TAX1BP1	5.15503e-23	0.282644	0.19	0.216	9.3136e-19
ANAPC13	5.61523e-23	0.34071	0.185	0.198	1.0145e-18
AFF4	5.76196e-23	-0.100372	0.218	0.296	1.04101e-18
TOMM5	5.93252e-23	0.293144	0.294	0.304	1.07183e-18
GRIK2	6.05937e-23	-0.44773	0.128	0.221	1.09475e-18
MSI1	6.11554e-23	-0.440579	0.107	0.188	1.10489e-18
UBAP2L	6.38264e-23	0.247878	0.246	0.279	1.15315e-18
POLR2A	6.44858e-23	0.329174	0.249	0.262	1.16506e-18
PBX2	6.83379e-23	-0.24746	0.151	0.232	1.23466e-18
FBXL17	7.0021e-23	0.17175	0.295	0.34	1.26507e-18
MSTO1	7.13189e-23	0.399203	0.266	0.253	1.28852e-18
AP4B1	7.38104e-23	0.500155	0.137	0.138	1.33353e-18
MAPT	7.5382e-23	-0.207086	0.395	0.527	1.36193e-18
GTF2I	7.69739e-23	-0.367694	0.083	0.157	1.39069e-18
STK19	7.75349e-23	0.50185	0.179	0.17	1.40082e-18
KCNQ2	7.95105e-23	-0.342386	0.131	0.216	1.43652e-18
NDUFA10	8.0468e-23	0.27345	0.205	0.227	1.45382e-18
ANKRD46	8.30674e-23	0.229187	0.218	0.25	1.50078e-18
CCDC47	8.52265e-23	0.464575	0.219	0.208	1.53979e-18
BMP7	8.96367e-23	-0.972314	0.034	0.096	1.61947e-18
PTBP2	9.3569e-23	-0.211771	0.257	0.361	1.69051e-18
PAFAH1B3	9.79192e-23	-0.540221	0.136	0.241	1.76911e-18
FIP1L1	1.01531e-22	0.35057	0.208	0.215	1.83437e-18
SESN2	1.03829e-22	0.841676	0.122	0.092	1.87588e-18
ATP6V0A1	1.07228e-22	0.204272	0.32	0.362	1.93729e-18
VASH1	1.11342e-22	-0.333195	0.163	0.26	2.01161e-18
IGSF9B	1.11474e-22	0.32323	0.117	0.136	2.014e-18
VSTM2L	1.14159e-22	-0.550773	0.058	0.124	2.06251e-18
LAMTOR4	1.15328e-22	0.104982	0.21	0.258	2.08364e-18
ARPC4	1.16102e-22	0.171295	0.12	0.156	2.09762e-18
DNM1L	1.16419e-22	0.153348	0.202	0.252	2.10335e-18
DDRGK1	1.16885e-22	0.479366	0.215	0.212	2.11176e-18
MIF	1.1698e-22	0.104006	0.403	0.473	2.11348e-18
SEPTIN3	1.17639e-22	-0.206438	0.337	0.466	2.12538e-18
CBX4	1.1932e-22	0.397204	0.206	0.209	2.15575e-18
ARFGAP3	1.19376e-22	0.46594	0.223	0.219	2.15677e-18
ATF7IP	1.20698e-22	-0.183718	0.223	0.319	2.18065e-18
TXNL1	1.23754e-22	0.203143	0.25	0.283	2.23586e-18
PES1	1.25668e-22	0.561096	0.175	0.155	2.27044e-18
TAF7	1.27624e-22	0.203693	0.317	0.359	2.30577e-18
FAM89B	1.29636e-22	-0.364704	0.149	0.24	2.34213e-18
KLHL23	1.33691e-22	-0.433139	0.089	0.164	2.4154e-18
CHID1	1.38724e-22	0.227207	0.206	0.24	2.50632e-18
TAOK1	1.41934e-22	-0.108666	0.238	0.332	2.56431e-18
DIDO1	1.45142e-22	0.159559	0.136	0.183	2.62228e-18
PEA15	1.45385e-22	-0.282485	0.25	0.365	2.62668e-18
THRAP3	1.45954e-22	0.296161	0.217	0.237	2.63695e-18
SUPT16H	1.46165e-22	0.138128	0.193	0.238	2.64077e-18
MPPED2	1.54393e-22	-0.119488	0.157	0.231	2.78941e-18
NT5DC2	1.61317e-22	-0.205786	0.202	0.289	2.91451e-18
HSPA13	1.67107e-22	0.158887	0.188	0.218	3.01912e-18
PCM1	1.69709e-22	0.100754	0.294	0.355	3.06613e-18
RND2	1.72089e-22	-0.380965	0.102	0.179	3.10913e-18
MT-ND5	1.74738e-22	-0.118424	0.37	0.48	3.15699e-18
CCNK	1.75932e-22	0.390757	0.243	0.236	3.17856e-18
TNRC18	1.78969e-22	-0.244516	0.152	0.239	3.23343e-18
FAM241B	1.82672e-22	-0.149675	0.234	0.329	3.30033e-18
AGPAT4	1.85126e-22	-0.143029	0.199	0.28	3.34467e-18
CCT6A	1.96721e-22	0.210059	0.255	0.288	3.55416e-18
NAP1L5	1.98334e-22	-0.201436	0.159	0.238	3.5833e-18
RAB6A	1.99775e-22	0.152837	0.377	0.421	3.60934e-18
PKM	2.14749e-22	0.225041	0.327	0.356	3.87986e-18
PDXK	2.18735e-22	0.393631	0.215	0.219	3.95189e-18
SYT13	2.19119e-22	0.357279	0.243	0.249	3.95883e-18
PLXNB1	2.21545e-22	-0.521932	0.064	0.132	4.00265e-18
TAF10	2.22889e-22	0.160843	0.238	0.273	4.02694e-18
SETBP1	2.23047e-22	-0.284672	0.139	0.229	4.02979e-18
LEPROTL1	2.28663e-22	0.157351	0.22	0.26	4.13126e-18
GRIA4	2.33122e-22	-0.966788	0.048	0.123	4.21182e-18
NSG2	2.33413e-22	-0.278061	0.335	0.472	4.21707e-18
PDCD4	2.38091e-22	0.245352	0.233	0.255	4.30158e-18
AKT3	2.41553e-22	0.16743	0.291	0.356	4.36414e-18
NDUFV3	2.46131e-22	0.241264	0.211	0.233	4.44685e-18
CPSF7	2.53607e-22	0.143909	0.201	0.243	4.58191e-18
BEX3	2.61369e-22	-0.303838	0.423	0.578	4.72216e-18
STXBP1	2.68906e-22	-0.222507	0.33	0.452	4.85832e-18
C16orf58	2.73729e-22	0.290969	0.242	0.253	4.94547e-18
FARSA	2.80841e-22	0.164425	0.214	0.25	5.07395e-18
SLC8A1	2.80887e-22	0.903499	0.159	0.127	5.07478e-18
AP3D1	2.81826e-22	0.301927	0.353	0.366	5.09174e-18
NBEA	2.86135e-22	-0.364237	0.1	0.181	5.1696e-18
SCCPDH	2.89639e-22	-0.252112	0.131	0.203	5.2329e-18
ZNF512	2.96543e-22	0.102704	0.216	0.258	5.35765e-18
SPON1	2.98673e-22	-2.6637	0.007	0.057	5.39613e-18
TUFM	2.98997e-22	-0.135437	0.185	0.26	5.40198e-18
ALG9	3.02994e-22	0.248097	0.147	0.173	5.47419e-18
MPC1	3.02997e-22	0.455831	0.346	0.301	5.47425e-18
MANF	3.08651e-22	0.347029	0.142	0.154	5.57639e-18
BBC3	3.29638e-22	0.817569	0.182	0.146	5.95557e-18
CCDC82	3.36949e-22	0.204322	0.24	0.278	6.08766e-18
AGRN	3.37086e-22	-0.163368	0.184	0.273	6.09014e-18
PFDN2	3.38843e-22	0.289675	0.253	0.263	6.12188e-18
ZRANB1	3.41189e-22	0.285923	0.223	0.243	6.16425e-18
PHC2	3.49386e-22	-0.581977	0.1	0.19	6.31235e-18
NCKAP1	3.59114e-22	-0.112352	0.174	0.245	6.48812e-18
ARL8A	3.601e-22	-0.36441	0.099	0.174	6.50593e-18
LAPTM4A	3.79732e-22	0.52295	0.178	0.17	6.86062e-18
SEL1L	3.79854e-22	0.366934	0.174	0.18	6.86282e-18
DCAF16	3.81659e-22	0.100392	0.232	0.286	6.89543e-18
YTHDC1	3.82445e-22	0.102141	0.18	0.222	6.90963e-18
APBB2	3.83336e-22	-0.402218	0.086	0.158	6.92573e-18
DDX17	3.85709e-22	-0.100826	0.177	0.256	6.96861e-18
ARHGAP33	3.95185e-22	-0.243904	0.118	0.189	7.13981e-18
ATP1A2	4.0306e-22	-3.13455	0.003	0.045	7.28208e-18
TOMM20	4.11744e-22	0.208828	0.408	0.443	7.43898e-18
CBFA2T2	4.22303e-22	0.182541	0.165	0.2	7.62975e-18
GNB2	4.28105e-22	-0.168262	0.269	0.367	7.73457e-18
CACNG4	4.29931e-22	-0.279653	0.134	0.22	7.76756e-18
ZNF618	4.48322e-22	-0.525491	0.089	0.167	8.09983e-18
DLG5	4.48958e-22	-0.400191	0.085	0.155	8.11132e-18
ZSCAN18	4.51299e-22	0.150806	0.228	0.276	8.15362e-18
CTTN	4.54687e-22	-0.236114	0.192	0.282	8.21483e-18
VMP1	4.94427e-22	0.482265	0.165	0.161	8.93282e-18
COX6A1	4.95948e-22	0.17825	0.272	0.308	8.9603e-18
EFTUD2	5.4208e-22	0.224049	0.122	0.151	9.79375e-18
KLHL5	5.51295e-22	-0.168592	0.114	0.181	9.96024e-18
MAP2K4	5.54838e-22	-0.32232	0.12	0.195	1.00243e-17
OLFM2	5.57903e-22	-0.398912	0.092	0.166	1.00796e-17
NFIB	5.67383e-22	-1.29503	0.027	0.096	1.02509e-17
DMWD	5.71654e-22	-0.253387	0.19	0.277	1.03281e-17
COX7C	5.72343e-22	0.142465	0.284	0.339	1.03405e-17
MAP4	5.991e-22	0.12017	0.333	0.392	1.08239e-17
BPTF	6.00182e-22	-0.155876	0.177	0.249	1.08435e-17
SHOC2	6.01837e-22	0.125038	0.226	0.268	1.08734e-17
YIPF3	6.04898e-22	0.213085	0.241	0.274	1.09287e-17
SEPHS1	6.06967e-22	-0.57901	0.091	0.176	1.09661e-17
MPV17	6.15064e-22	0.207245	0.225	0.254	1.11124e-17
BEX1	6.1757e-22	-0.188613	0.337	0.455	1.11576e-17
ADAMTS7	6.58151e-22	-0.873159	0.04	0.102	1.18908e-17
BEX5	6.58542e-22	-0.322493	0.142	0.224	1.18979e-17
AUTS2	6.61144e-22	-0.108217	0.358	0.475	1.19449e-17
ZNF358	6.74865e-22	-0.129698	0.165	0.237	1.21928e-17
ERH	6.92146e-22	0.255763	0.298	0.317	1.2505e-17
ARMCX1	6.99605e-22	0.411499	0.208	0.207	1.26398e-17
GFOD2	7.05546e-22	-0.375084	0.11	0.187	1.27471e-17
CWC15	7.19364e-22	0.253092	0.18	0.217	1.29967e-17
PPP3CA	7.31186e-22	-0.628777	0.079	0.16	1.32103e-17
ATP6V0E2	7.37767e-22	-0.431138	0.126	0.217	1.33292e-17
SELENOH	7.40681e-22	0.128223	0.399	0.46	1.33819e-17
NME2	7.65655e-22	0.357485	0.154	0.173	1.38331e-17
SMAD5	7.70533e-22	0.373723	0.156	0.168	1.39212e-17
ROBO1	7.81428e-22	-0.25698	0.181	0.275	1.41181e-17
LRRC40	7.99406e-22	-0.224633	0.099	0.167	1.44429e-17
COPS2	8.01285e-22	0.276776	0.239	0.262	1.44768e-17
DAPK3	8.21107e-22	0.439624	0.165	0.163	1.48349e-17
ACTN4	8.45295e-22	-0.450683	0.058	0.114	1.52719e-17
STX7	8.5499e-22	-0.234502	0.144	0.224	1.54471e-17
PREPL	8.81424e-22	0.308214	0.49	0.504	1.59247e-17
UBE2V1	9.08597e-22	-0.233466	0.24	0.339	1.64156e-17
CDIP1	9.11473e-22	0.214136	0.137	0.172	1.64676e-17
MAT2A	9.22125e-22	-0.169775	0.298	0.404	1.666e-17
MED8	9.29364e-22	0.52164	0.231	0.2	1.67908e-17
LDOC1	9.51903e-22	-0.200163	0.157	0.228	1.7198e-17
CSRNP3	9.66107e-22	-0.33754	0.185	0.291	1.74547e-17
RSF1	9.83291e-22	-0.172648	0.126	0.201	1.77651e-17
APBB1	9.92726e-22	-0.165335	0.199	0.288	1.79356e-17
HP1BP3	1.0238e-21	-0.232869	0.113	0.183	1.84969e-17
SYAP1	1.05587e-21	0.297984	0.235	0.24	1.90765e-17
DPH7	1.07124e-21	0.477153	0.191	0.186	1.93541e-17
POLD2	1.07818e-21	0.415566	0.143	0.154	1.94796e-17
ILDR2	1.10194e-21	-0.928471	0.013	0.055	1.99088e-17
ARX	1.2155e-21	-0.70377	0.092	0.185	2.19604e-17
TMEM50A	1.27477e-21	0.205664	0.23	0.265	2.30312e-17
ACHE	1.28006e-21	0.51599	0.19	0.175	2.31269e-17
PRPF19	1.28201e-21	0.301452	0.221	0.244	2.31621e-17
LBH	1.2856e-21	-0.598671	0.134	0.234	2.32269e-17
B4GALT2	1.30687e-21	-0.313469	0.108	0.181	2.36111e-17
CYC1	1.3684e-21	0.189204	0.187	0.224	2.47228e-17
ZMYM4	1.40569e-21	-0.207461	0.149	0.224	2.53967e-17
TOM1L2	1.43143e-21	0.345016	0.151	0.164	2.58616e-17
BIN1	1.44226e-21	-0.121508	0.198	0.274	2.60573e-17
HK2	1.45618e-21	0.670993	0.205	0.165	2.63088e-17
ZMIZ1	1.45936e-21	0.217383	0.36	0.393	2.63662e-17
CREB1	1.47486e-21	-0.232765	0.119	0.185	2.66463e-17
SELENOS	1.51677e-21	0.448079	0.214	0.202	2.74034e-17
FGFR2	1.58295e-21	-2.09317	0.014	0.074	2.85991e-17
PJA1	1.58632e-21	-0.176715	0.173	0.256	2.86601e-17
OSBPL8	1.59981e-21	-0.1825	0.14	0.211	2.89038e-17
RARS	1.60972e-21	0.491626	0.177	0.17	2.90828e-17
GZF1	1.61963e-21	0.710501	0.136	0.107	2.92619e-17
DPYD	1.6562e-21	-0.738677	0.051	0.124	2.99226e-17
SYT5	1.66231e-21	-0.179295	0.165	0.242	3.00329e-17
CACNB1	1.6669e-21	-0.175387	0.108	0.169	3.01159e-17
CDK5R1	1.75427e-21	-0.113218	0.28	0.381	3.16944e-17
ACBD6	1.80621e-21	-0.187736	0.169	0.245	3.26327e-17
DOK4	1.81351e-21	-0.444846	0.128	0.218	3.27647e-17
DLGAP4	1.8305e-21	-0.255159	0.222	0.325	3.30716e-17
TMEM183A	1.84364e-21	0.337247	0.264	0.278	3.3309e-17
SIKE1	1.85617e-21	0.520024	0.236	0.21	3.35355e-17
IDS	1.85974e-21	0.119106	0.251	0.308	3.35998e-17
BANF1	1.86037e-21	0.414579	0.213	0.213	3.36112e-17
LAMP1	1.86408e-21	0.214731	0.161	0.185	3.36783e-17
OGA	1.894e-21	0.189832	0.471	0.523	3.42189e-17
LUC7L	1.91262e-21	0.150376	0.229	0.288	3.45553e-17
WDR45B	1.91325e-21	0.389911	0.231	0.228	3.45667e-17
MAGI2	1.92597e-21	-0.488446	0.074	0.147	3.47965e-17
EXT1	1.93292e-21	0.369744	0.179	0.187	3.4922e-17
VDAC1	1.98416e-21	0.375787	0.169	0.18	3.58478e-17
CREBZF	2.00068e-21	-0.17603	0.2	0.285	3.61463e-17
SLC29A4	2.00443e-21	-0.617845	0.08	0.161	3.62141e-17
RAB33B	2.03698e-21	0.665883	0.112	0.1	3.68021e-17
CTPS1	2.12363e-21	0.217464	0.118	0.148	3.83677e-17
HMGB2	2.2827e-21	0.658173	0.197	0.162	4.12416e-17
STUB1	2.30454e-21	-0.316258	0.134	0.215	4.16361e-17
GOSR2	2.35081e-21	0.326806	0.329	0.328	4.24722e-17
SMARCD3	2.39223e-21	-0.391575	0.161	0.262	4.32204e-17
VPS53	2.42736e-21	0.343738	0.21	0.212	4.38551e-17
MYO6	2.45552e-21	0.386191	0.191	0.204	4.43639e-17
MRNIP	2.48461e-21	0.214629	0.196	0.228	4.48895e-17
BCAT1	2.51335e-21	0.583545	0.163	0.154	4.54087e-17
TMEM259	2.53516e-21	0.181809	0.374	0.424	4.58027e-17
LRRC47	2.60011e-21	0.140317	0.211	0.249	4.69762e-17
FBXO30	2.61421e-21	-0.506257	0.096	0.172	4.7231e-17
EXOC6B	2.66831e-21	-0.157469	0.178	0.252	4.82083e-17
SSBP2	2.81663e-21	-0.414826	0.134	0.229	5.08881e-17
ZKSCAN1	2.86671e-21	-0.184226	0.172	0.241	5.17928e-17
APLP2	2.87761e-21	-0.200401	0.223	0.312	5.19897e-17
UBTD2	3.05667e-21	-0.164763	0.085	0.14	5.52248e-17
CASC3	3.07941e-21	0.237378	0.282	0.31	5.56357e-17
SETD3	3.22517e-21	0.440729	0.183	0.182	5.82692e-17
SEC22B	3.29597e-21	0.402662	0.198	0.197	5.95482e-17
COTL1	3.31784e-21	-0.472681	0.072	0.14	5.99434e-17
APH1A	3.35804e-21	0.260031	0.203	0.224	6.06697e-17
SLU7	3.39365e-21	0.259976	0.149	0.175	6.1313e-17
SPECC1L	3.56676e-21	0.157089	0.122	0.156	6.44406e-17
MYDGF	3.62278e-21	0.377733	0.215	0.214	6.54527e-17
PPP1R1A	3.63948e-21	-0.286063	0.137	0.221	6.57545e-17
SETD5	3.67238e-21	0.240392	0.279	0.31	6.63488e-17
CNR1	3.72194e-21	-0.35303	0.104	0.185	6.72442e-17
SCG5	3.75179e-21	-0.319812	0.184	0.288	6.77835e-17
NAGK	3.79024e-21	0.176062	0.214	0.251	6.84783e-17
MLH1	3.84153e-21	0.159496	0.137	0.17	6.94049e-17
SCG2	3.98673e-21	-0.192452	0.177	0.255	7.20283e-17
UFC1	4.09529e-21	-0.349318	0.053	0.106	7.39896e-17
DIS3	4.18422e-21	0.469456	0.233	0.222	7.55963e-17
TTBK1	4.19899e-21	0.475465	0.184	0.18	7.58632e-17
NAPA	4.20572e-21	0.32642	0.273	0.281	7.59847e-17
TMED9	4.21363e-21	0.325299	0.167	0.179	7.61276e-17
PCDH9	4.24895e-21	-0.885942	0.028	0.079	7.67657e-17
ASH1L	4.277e-21	0.176686	0.202	0.239	7.72726e-17
USP14	4.28608e-21	0.102227	0.253	0.302	7.74367e-17
RAB5B	4.30663e-21	0.1639	0.165	0.207	7.78079e-17
ADAR	4.39649e-21	-0.118731	0.265	0.35	7.94314e-17
SNN	4.48362e-21	-0.386642	0.088	0.157	8.10056e-17
ZCRB1	4.52622e-21	0.218717	0.185	0.218	8.17752e-17
ATG13	4.56714e-21	0.391528	0.166	0.174	8.25146e-17
RALGAPB	4.63965e-21	0.172117	0.136	0.174	8.38245e-17
EIF4B	4.69256e-21	0.390576	0.161	0.168	8.47804e-17
SYMPK	4.80747e-21	0.147998	0.179	0.221	8.68566e-17
SNRPD2	4.82063e-21	0.320201	0.193	0.208	8.70943e-17
PGD	4.95849e-21	-0.274161	0.129	0.205	8.95851e-17
TRAPPC6B	4.9678e-21	0.178148	0.19	0.237	8.97533e-17
NLGN3	4.97935e-21	-0.690056	0.061	0.129	8.99619e-17
IER2	5.03523e-21	0.799672	0.147	0.115	9.09715e-17
PPFIA2	5.15087e-21	-0.39977	0.095	0.167	9.30608e-17
PCDH19	5.16203e-21	-0.707052	0.084	0.17	9.32624e-17
ACSL3	5.2815e-21	0.109156	0.195	0.244	9.54209e-17
HES6	5.38283e-21	-0.543165	0.073	0.144	9.72515e-17
SCRN1	5.45297e-21	-0.348116	0.142	0.234	9.85188e-17
MAPRE2	5.54853e-21	-0.131161	0.251	0.346	1.00245e-16
RTCB	5.66572e-21	0.305844	0.188	0.205	1.02363e-16
TOX4	5.72481e-21	0.259623	0.22	0.24	1.0343e-16
JPH4	5.86592e-21	-0.435291	0.189	0.299	1.0598e-16
NECAB2	6.02009e-21	-0.901539	0.048	0.116	1.08765e-16
NFX1	6.06138e-21	0.435149	0.141	0.148	1.09511e-16
MSH2	6.10818e-21	0.133906	0.17	0.203	1.10356e-16
EIF4A3	6.15081e-21	0.239676	0.21	0.237	1.11127e-16
PXDN	6.24005e-21	-0.277439	0.066	0.121	1.12739e-16
ZNF300	6.36647e-21	-0.414405	0.076	0.143	1.15023e-16
DGKB	6.3741e-21	-1.8723	0.011	0.063	1.15161e-16
SLC39A6	6.42102e-21	0.114389	0.214	0.265	1.16009e-16
RIPOR1	6.59548e-21	-0.257416	0.111	0.176	1.19161e-16
NF1	6.65344e-21	-0.112216	0.128	0.194	1.20208e-16
LSM4	6.788e-21	0.309743	0.278	0.284	1.22639e-16
SNX14	6.89092e-21	0.148156	0.22	0.263	1.24498e-16
ARID1A	7.07182e-21	-0.123891	0.191	0.278	1.27767e-16
PCDHB2	7.0896e-21	-0.180712	0.15	0.224	1.28088e-16
SYNE2	7.20292e-21	-0.449815	0.117	0.205	1.30135e-16
MDH2	7.28817e-21	0.191034	0.162	0.191	1.31675e-16
ELAVL3	7.59417e-21	0.149752	0.427	0.494	1.37204e-16
ARGLU1	7.66431e-21	-0.227698	0.142	0.222	1.38471e-16
RBM14	7.80444e-21	0.20411	0.132	0.162	1.41003e-16
PYGB	7.88486e-21	-0.128092	0.224	0.299	1.42456e-16
RCAN3	7.90536e-21	-0.511223	0.069	0.134	1.42826e-16
PSMB5	7.98551e-21	-0.155388	0.196	0.279	1.44274e-16
TMED10	8.24623e-21	0.124372	0.109	0.14	1.48985e-16
SESTD1	8.40576e-21	-0.233693	0.208	0.307	1.51867e-16
DYNLT1	8.53007e-21	-0.139823	0.203	0.286	1.54113e-16
C9orf78	8.53134e-21	0.426078	0.141	0.148	1.54136e-16
MTCH1	8.64392e-21	0.301596	0.276	0.295	1.5617e-16
TRO	8.81518e-21	0.110079	0.178	0.212	1.59264e-16
ASTN1	9.02994e-21	-0.73065	0.071	0.147	1.63144e-16
TRIR	9.11608e-21	-0.154757	0.202	0.291	1.647e-16
SMC3	9.14943e-21	0.197152	0.173	0.203	1.65303e-16
RGS17	9.65995e-21	-0.500293	0.065	0.132	1.74526e-16
EIF4G3	9.74846e-21	0.212384	0.228	0.272	1.76125e-16
APBA2	9.99476e-21	-0.222234	0.116	0.191	1.80575e-16
PPP4C	1.00991e-20	-0.124847	0.205	0.278	1.8246e-16
CASD1	1.0132e-20	-0.694164	0.064	0.139	1.83056e-16
TIMP1	1.02961e-20	0.805608	0.142	0.105	1.86019e-16
SYNGR3	1.05983e-20	0.270062	0.194	0.217	1.91479e-16
RGS8	1.08055e-20	-0.915771	0.045	0.115	1.95223e-16
KDELR2	1.08606e-20	0.422474	0.254	0.237	1.96219e-16
YPEL1	1.0939e-20	-0.478296	0.065	0.135	1.97635e-16
TGFBR1	1.10237e-20	-0.453776	0.085	0.154	1.99164e-16
CHMP2A	1.12478e-20	0.380253	0.276	0.277	2.03214e-16
MT-CO3	1.15609e-20	-0.298253	0.897	0.944	2.08871e-16
RBM33	1.17366e-20	0.247055	0.304	0.328	2.12045e-16
PAM16	1.17745e-20	0.342401	0.2	0.205	2.1273e-16
DDX42	1.18668e-20	0.364996	0.233	0.241	2.14397e-16
NONO	1.20253e-20	-0.242719	0.144	0.22	2.17261e-16
CLTB	1.20677e-20	0.131127	0.185	0.228	2.18027e-16
NUDCD2	1.22573e-20	0.344268	0.145	0.165	2.21453e-16
TBR1	1.23045e-20	2.78898	0.035	0.007	2.22305e-16
CIAO1	1.23276e-20	0.188693	0.208	0.242	2.22724e-16
RTN4	1.24159e-20	0.109252	0.3	0.365	2.24319e-16
PHRF1	1.24346e-20	0.394421	0.146	0.151	2.24656e-16
PITHD1	1.24835e-20	0.133035	0.156	0.199	2.2554e-16
P4HA1	1.25466e-20	0.489875	0.232	0.211	2.26679e-16
CCSER2	1.26616e-20	-0.21827	0.173	0.255	2.28758e-16
LCMT1	1.26689e-20	0.302219	0.19	0.203	2.28888e-16
TMEM208	1.26909e-20	0.383386	0.223	0.22	2.29287e-16
FAT1	1.27108e-20	-0.35821	0.082	0.151	2.29647e-16
COPB2	1.28509e-20	0.357825	0.343	0.334	2.32176e-16
TMEM245	1.31488e-20	0.248548	0.175	0.206	2.37559e-16
LMBRD1	1.31927e-20	0.208595	0.161	0.193	2.38353e-16
NUP133	1.32871e-20	0.215829	0.147	0.177	2.40058e-16
DDX18	1.34285e-20	0.347047	0.222	0.225	2.42613e-16
TGOLN2	1.41188e-20	0.313773	0.128	0.149	2.55085e-16
MAP4K3	1.45227e-20	-0.496787	0.073	0.14	2.62382e-16
OXA1L	1.469e-20	0.274721	0.156	0.176	2.65405e-16
MT-ND6	1.47724e-20	0.163128	0.454	0.505	2.66893e-16
SF3B2	1.49297e-20	0.362887	0.155	0.167	2.69734e-16
DTX4	1.54204e-20	-0.276471	0.108	0.18	2.786e-16
GRIK5	1.54304e-20	-0.339107	0.161	0.251	2.78781e-16
TCEAL8	1.57264e-20	0.122629	0.134	0.174	2.84129e-16
RTN2	1.58329e-20	-0.703465	0.059	0.127	2.86052e-16
UTRN	1.60092e-20	-0.897772	0.062	0.139	2.89239e-16
ANKRD6	1.6273e-20	-0.838947	0.052	0.121	2.94005e-16
MANEAL	1.64616e-20	-0.250695	0.108	0.176	2.97413e-16
UVSSA	1.64841e-20	0.413096	0.249	0.241	2.97819e-16
C7orf50	1.66757e-20	0.105086	0.288	0.336	3.01281e-16
TSN	1.71029e-20	0.316093	0.172	0.183	3.08997e-16
DDR1	1.71658e-20	-0.159805	0.321	0.441	3.10134e-16
ACVR2B	1.72605e-20	-0.311338	0.164	0.253	3.11846e-16
NUP93	1.78217e-20	-0.213936	0.144	0.211	3.21985e-16
EIF1B	1.81112e-20	0.154676	0.433	0.486	3.27216e-16
DAG1	1.8161e-20	0.165771	0.128	0.162	3.28116e-16
ATF2	1.83379e-20	-0.131002	0.212	0.295	3.3131e-16
PFDN5	1.84097e-20	0.215039	0.242	0.27	3.32608e-16
PRKCZ	1.85095e-20	-0.481697	0.068	0.135	3.34411e-16
MAST1	1.86376e-20	-0.385149	0.111	0.188	3.36725e-16
ANKRD17	1.86912e-20	0.16848	0.294	0.333	3.37694e-16
SLC2A13	1.90411e-20	-0.625717	0.054	0.117	3.44016e-16
PPP4R3B	1.93054e-20	0.206766	0.235	0.263	3.48791e-16
TP53BP1	1.99123e-20	-0.26181	0.198	0.289	3.59755e-16
C18orf32	1.99717e-20	0.146265	0.236	0.278	3.60829e-16
CTPS2	2.01663e-20	-0.244206	0.112	0.174	3.64345e-16
NME1	2.03727e-20	0.170058	0.204	0.235	3.68074e-16
MT-ND3	2.04202e-20	-0.229577	0.389	0.52	3.68931e-16
PHLDB1	2.05655e-20	-0.40806	0.112	0.191	3.71557e-16
H1F0	2.11551e-20	0.499787	0.165	0.165	3.8221e-16
CASTOR3	2.14455e-20	-0.339788	0.11	0.187	3.87455e-16
HSPD1	2.20545e-20	0.340955	0.224	0.238	3.98459e-16
ARL14EP	2.20658e-20	0.420938	0.163	0.162	3.98662e-16
KIF3C	2.25048e-20	-0.527473	0.129	0.224	4.06595e-16
WARS	2.25261e-20	0.324026	0.202	0.205	4.06979e-16
YWHAZ	2.33757e-20	-0.138397	0.366	0.476	4.22328e-16
MMP16	2.37003e-20	-0.550451	0.058	0.13	4.28194e-16
SEMA5A	2.40284e-20	-1.1671	0.019	0.071	4.34121e-16
PLPPR1	2.41813e-20	-0.489026	0.068	0.14	4.36884e-16
SEPTIN6	2.43128e-20	-0.115471	0.111	0.167	4.3926e-16
CNRIP1	2.43539e-20	-0.173603	0.115	0.17	4.40002e-16
LRFN4	2.4563e-20	0.192257	0.149	0.186	4.43779e-16
CNTFR	2.48869e-20	0.296039	0.196	0.215	4.49632e-16
BEX4	2.51732e-20	0.221985	0.419	0.463	4.54804e-16
PCGF3	2.51956e-20	-0.139299	0.153	0.222	4.55208e-16
RAD23B	2.52524e-20	-0.178647	0.129	0.19	4.56236e-16
GPS1	2.5669e-20	-0.26923	0.097	0.161	4.63763e-16
LONP1	2.62128e-20	0.444536	0.174	0.159	4.73587e-16
CHERP	2.65563e-20	0.451696	0.2	0.194	4.79793e-16
SRI	2.65676e-20	-0.114736	0.148	0.218	4.79996e-16
CAB39	2.70969e-20	-0.118146	0.183	0.256	4.89559e-16
UBE2J1	2.73427e-20	-0.231621	0.116	0.178	4.94001e-16
SLC25A4	2.75371e-20	0.119104	0.221	0.261	4.97513e-16
VDAC3	2.7735e-20	0.292126	0.204	0.229	5.01088e-16
BUD31	2.79002e-20	0.274537	0.29	0.303	5.04073e-16
BUD23	2.87549e-20	0.455434	0.165	0.16	5.19515e-16
HNRNPR	2.88644e-20	-0.153702	0.125	0.186	5.21493e-16
ARL1	2.91274e-20	0.615751	0.172	0.142	5.26244e-16
DSTN	2.93724e-20	-0.146703	0.338	0.441	5.30671e-16
CLSTN1	2.95745e-20	-0.188746	0.295	0.401	5.34322e-16
RAPGEF6	2.96354e-20	-0.144211	0.119	0.185	5.35423e-16
LRP3	2.96835e-20	-0.148079	0.187	0.262	5.36291e-16
SLAIN1	2.97481e-20	-0.408321	0.099	0.17	5.3746e-16
RIPOR2	3.01926e-20	-0.238551	0.086	0.152	5.45489e-16
SEC24C	3.0799e-20	0.332176	0.28	0.288	5.56445e-16
CPNE2	3.09841e-20	-0.707595	0.06	0.13	5.59789e-16
SEMA4C	3.26337e-20	-0.162677	0.144	0.212	5.89593e-16
ECHS1	3.29616e-20	0.225625	0.153	0.173	5.95517e-16
EPHB3	3.34497e-20	-0.434945	0.085	0.154	6.04336e-16
TRIO	3.35216e-20	-0.253655	0.113	0.186	6.05635e-16
XBP1	3.36205e-20	0.615892	0.172	0.146	6.07421e-16
HIPK2	3.42903e-20	-0.141635	0.203	0.284	6.19523e-16
SBK1	3.50143e-20	-0.155214	0.434	0.561	6.32604e-16
DYM	3.51042e-20	0.197784	0.273	0.308	6.34228e-16
EPRS	3.51382e-20	0.379282	0.341	0.325	6.34841e-16
ATP5MG	3.56591e-20	0.117404	0.222	0.273	6.44253e-16
ERLEC1	3.58317e-20	0.248749	0.201	0.231	6.47371e-16
EDIL3	3.61293e-20	-0.412925	0.083	0.15	6.52747e-16
ZNF384	3.65272e-20	0.182779	0.181	0.216	6.59937e-16
PPIA	3.8032e-20	-0.225036	0.132	0.206	6.87124e-16
TRMT112	3.87335e-20	0.503815	0.218	0.198	6.99799e-16
RNF141	3.93728e-20	0.191264	0.167	0.203	7.11348e-16
SPOP	3.96545e-20	0.130016	0.109	0.15	7.16438e-16
RER1	3.96628e-20	0.383211	0.277	0.265	7.16587e-16
TSPYL4	4.05075e-20	-0.296008	0.16	0.246	7.31849e-16
MLLT1	4.07812e-20	-0.190795	0.14	0.208	7.36793e-16
GRB2	4.18375e-20	-0.122117	0.129	0.185	7.55878e-16
ATP1B2	4.36786e-20	-0.114384	0.208	0.284	7.89142e-16
FBXO22	4.38871e-20	0.572103	0.109	0.107	7.92909e-16
GSTP1	4.49843e-20	0.21154	0.298	0.327	8.12731e-16
LAMTOR3	4.5072e-20	0.308168	0.218	0.227	8.14317e-16
TOP1	4.61731e-20	-0.117608	0.156	0.218	8.34209e-16
ORMDL1	4.63718e-20	0.31761	0.224	0.231	8.37799e-16
KLHL7	4.66502e-20	-0.104376	0.137	0.197	8.4283e-16
DDIT4	4.6885e-20	0.16461	0.37	0.406	8.47071e-16
ADGRB1	4.80775e-20	-0.308186	0.097	0.158	8.68616e-16
MYT1	4.8191e-20	-0.189197	0.127	0.195	8.70667e-16
PPIL1	5.05102e-20	-0.269113	0.118	0.186	9.12569e-16
NCBP2	5.12843e-20	0.158416	0.272	0.31	9.26553e-16
PBX3	5.35374e-20	0.172236	0.252	0.297	9.6726e-16
DPM1	5.40654e-20	0.501494	0.174	0.169	9.768e-16
PGM2L1	5.44563e-20	-0.362586	0.132	0.215	9.83861e-16
AKAP12	5.50034e-20	0.218363	0.149	0.181	9.93747e-16
RHOB	5.51175e-20	0.151667	0.196	0.237	9.95809e-16
EFNA5	5.53377e-20	-0.647007	0.067	0.137	9.99785e-16
KHDC4	5.57245e-20	0.450849	0.218	0.215	1.00677e-15
QKI	5.65443e-20	-0.684036	0.118	0.223	1.02159e-15
FAM222A	5.66993e-20	-0.595543	0.083	0.158	1.02439e-15
SH3BP4	5.81165e-20	-0.827425	0.038	0.097	1.04999e-15
LANCL1	5.82049e-20	-0.302328	0.114	0.19	1.05159e-15
RRP12	5.84015e-20	0.933064	0.099	0.069	1.05514e-15
UBE2D2	5.92561e-20	0.165035	0.152	0.193	1.07058e-15
ARHGEF7	5.95223e-20	-0.195652	0.201	0.284	1.07539e-15
P3H4	6.07129e-20	0.5698	0.118	0.109	1.0969e-15
OSBPL9	6.10417e-20	0.2311	0.149	0.171	1.10284e-15
RUSC2	6.12789e-20	0.172036	0.113	0.14	1.10713e-15
C19orf47	6.13331e-20	0.412729	0.113	0.121	1.1081e-15
LRP6	6.17124e-20	-0.102723	0.143	0.205	1.11496e-15
DLG2	6.17803e-20	-0.3157	0.107	0.174	1.11618e-15
NOL4L	6.22354e-20	-0.266516	0.149	0.228	1.12441e-15
MAX	6.65897e-20	0.283913	0.204	0.227	1.20308e-15
TPST1	6.67877e-20	0.291488	0.206	0.224	1.20665e-15
CUL1	6.77262e-20	-0.182333	0.111	0.173	1.22361e-15
ZFHX3	6.78149e-20	0.932761	0.155	0.112	1.22521e-15
COL4A2	6.85823e-20	-0.754509	0.04	0.098	1.23908e-15
TAF1D	6.87087e-20	0.56442	0.132	0.134	1.24136e-15
PSMD3	6.90944e-20	0.117122	0.27	0.308	1.24833e-15
ZRANB2	6.97294e-20	0.144414	0.267	0.302	1.2598e-15
CNBP	6.99394e-20	0.257223	0.345	0.364	1.26359e-15
SEC23B	7.0241e-20	0.347478	0.178	0.183	1.26904e-15
CACNB3	7.02663e-20	-0.35757	0.085	0.152	1.2695e-15
CD47	7.04181e-20	0.195735	0.187	0.225	1.27224e-15
TBC1D16	7.29996e-20	-0.209701	0.134	0.206	1.31888e-15
TP53INP1	7.33517e-20	-0.354666	0.058	0.109	1.32525e-15
AP1S1	7.47298e-20	-0.139823	0.16	0.228	1.35014e-15
NDUFS1	7.55019e-20	0.261385	0.185	0.202	1.36409e-15
TM7SF2	7.61824e-20	-0.238595	0.125	0.189	1.37639e-15
DNM1	7.67936e-20	-0.265214	0.183	0.273	1.38743e-15
MYO5A	7.73672e-20	-0.250044	0.171	0.258	1.39779e-15
UAP1	7.82324e-20	0.521257	0.171	0.16	1.41342e-15
CYBC1	8.37093e-20	-0.135061	0.107	0.162	1.51238e-15
AVL9	8.53812e-20	0.184872	0.175	0.206	1.54258e-15
AP2A1	8.62272e-20	0.12756	0.265	0.304	1.55787e-15
ATP5PF	8.6235e-20	-0.178964	0.153	0.224	1.55801e-15
FAM219B	8.63118e-20	-0.115257	0.151	0.219	1.55939e-15
ITM2B	8.65895e-20	0.123314	0.171	0.218	1.56441e-15
TNK2	8.69725e-20	-0.101534	0.148	0.209	1.57133e-15
SVBP	8.73202e-20	-0.205353	0.131	0.201	1.57761e-15
SLC25A11	8.89227e-20	0.189326	0.213	0.249	1.60657e-15
MAD2L2	8.89984e-20	-0.211428	0.138	0.212	1.60793e-15
PRDM4	9.02597e-20	0.45286	0.147	0.146	1.63072e-15
DHFR	9.20977e-20	-0.961809	0.037	0.099	1.66393e-15
SURF4	9.41885e-20	0.366431	0.224	0.221	1.7017e-15
PDZD4	9.42318e-20	-0.310984	0.172	0.264	1.70249e-15
OAZ2	9.84679e-20	-0.159507	0.283	0.382	1.77902e-15
CORO1A	9.85207e-20	-0.9254	0.042	0.108	1.77997e-15
CARM1	9.86562e-20	-0.272274	0.111	0.174	1.78242e-15
TRAF4	9.9164e-20	0.108116	0.216	0.26	1.7916e-15
MRFAP1L1	9.92069e-20	0.119287	0.241	0.29	1.79237e-15
TOMM70	1.01231e-19	0.335401	0.185	0.201	1.82894e-15
CEP170	1.03042e-19	-0.114064	0.2	0.276	1.86167e-15
AFAP1	1.03623e-19	-0.26596	0.096	0.164	1.87215e-15
SPG7	1.03676e-19	0.173581	0.215	0.243	1.87311e-15
ATF6B	1.05443e-19	0.129194	0.181	0.219	1.90504e-15
MCMBP	1.06471e-19	0.295701	0.179	0.193	1.92361e-15
TNRC6B	1.09951e-19	-0.174866	0.153	0.227	1.98648e-15
TPGS2	1.11698e-19	0.147875	0.311	0.354	2.01804e-15
FOXK1	1.12847e-19	0.342783	0.174	0.18	2.03881e-15
LNPK	1.13971e-19	0.110982	0.116	0.147	2.05912e-15
PHF14	1.14028e-19	0.122769	0.161	0.203	2.06015e-15
TRAK1	1.1417e-19	-0.330388	0.118	0.193	2.06271e-15
CAMSAP2	1.15769e-19	-0.15101	0.31	0.413	2.0916e-15
SLC44A2	1.19382e-19	0.240666	0.272	0.285	2.15688e-15
SLBP	1.19933e-19	0.402594	0.165	0.169	2.16683e-15
CSPG5	1.20399e-19	-0.501382	0.041	0.093	2.17525e-15
GUK1	1.21147e-19	0.350959	0.281	0.272	2.18875e-15
ZNF281	1.21999e-19	-0.158296	0.083	0.132	2.20415e-15
CDK5RAP3	1.22746e-19	0.202516	0.3	0.331	2.21764e-15
UBL5	1.23136e-19	0.187427	0.22	0.251	2.22469e-15
AP1S2	1.25566e-19	-0.240177	0.212	0.306	2.2686e-15
ADGRG1	1.2823e-19	-0.411674	0.177	0.28	2.31674e-15
TMX2	1.34947e-19	0.303938	0.321	0.322	2.43808e-15
MAF1	1.39294e-19	0.187595	0.189	0.223	2.51663e-15
C8orf33	1.44727e-19	0.264544	0.198	0.225	2.61478e-15
RAB6B	1.54881e-19	-0.129552	0.393	0.501	2.79823e-15
MIDN	1.57867e-19	-0.221781	0.292	0.404	2.85219e-15
EPHB2	1.60033e-19	-0.473104	0.104	0.18	2.89132e-15
FYN	1.62904e-19	-0.117781	0.142	0.206	2.94319e-15
DPY30	1.64052e-19	-0.233939	0.128	0.194	2.96393e-15
IRGQ	1.65949e-19	-0.157499	0.185	0.258	2.9982e-15
PPP1R9A	1.68987e-19	-0.710658	0.063	0.137	3.05308e-15
NFATC3	1.69425e-19	0.475628	0.157	0.153	3.06101e-15
ARHGEF4	1.70031e-19	-0.413598	0.069	0.131	3.07195e-15
BAZ1B	1.70112e-19	0.136552	0.186	0.226	3.07342e-15
ENY2	1.72247e-19	0.147585	0.158	0.191	3.11198e-15
BRF1	1.7353e-19	0.130327	0.154	0.195	3.13517e-15
CCDC14	1.76923e-19	-0.119751	0.122	0.18	3.19647e-15
XKR6	1.79434e-19	-0.133762	0.164	0.228	3.24183e-15
MED28	1.81283e-19	0.120547	0.136	0.173	3.27524e-15
PHACTR1	1.8245e-19	-1.34672	0.026	0.087	3.29633e-15
ZNF428	1.89596e-19	-0.142926	0.295	0.399	3.42544e-15
AP1G2	1.96643e-19	-0.661069	0.089	0.17	3.55275e-15
PHF20L1	2.00796e-19	0.184506	0.171	0.196	3.62777e-15
SALL2	2.0161e-19	-0.248717	0.097	0.157	3.64249e-15
YTHDC2	2.02137e-19	0.191872	0.137	0.172	3.652e-15
MGRN1	2.02968e-19	0.15759	0.177	0.218	3.66701e-15
SEPTIN9	2.0328e-19	-0.508258	0.106	0.191	3.67266e-15
GNAZ	2.10606e-19	0.215967	0.097	0.132	3.80501e-15
PPM1L	2.15809e-19	-0.305004	0.097	0.161	3.89903e-15
GALNT1	2.18295e-19	-0.171248	0.108	0.162	3.94393e-15
EIF2B1	2.26183e-19	0.550863	0.168	0.161	4.08645e-15
C4orf3	2.28554e-19	0.219458	0.181	0.2	4.12928e-15
ZMYND11	2.33002e-19	-0.495717	0.08	0.153	4.20965e-15
GET1	2.34953e-19	0.279861	0.341	0.354	4.2449e-15
CEBPZOS	2.35776e-19	0.206605	0.13	0.151	4.25977e-15
TFRC	2.35796e-19	0.127249	0.167	0.2	4.26012e-15
METTL26	2.38893e-19	0.209652	0.177	0.198	4.31608e-15
TIMM13	2.45933e-19	-0.279091	0.143	0.218	4.44327e-15
LRRTM3	2.52436e-19	-0.94337	0.039	0.102	4.56076e-15
TMEM87B	2.55417e-19	0.844843	0.124	0.091	4.61462e-15
SLC35E1	2.58773e-19	0.379826	0.185	0.185	4.67525e-15
MGAT4B	2.59706e-19	-0.12082	0.097	0.151	4.6921e-15
ACSL4	2.62154e-19	0.126624	0.145	0.18	4.73633e-15
RCN2	2.6332e-19	-0.18854	0.14	0.206	4.75741e-15
DYNLL2	2.65819e-19	-0.236302	0.566	0.708	4.80255e-15
NAE1	2.66345e-19	0.156327	0.128	0.166	4.81205e-15
LRPAP1	2.68662e-19	0.159587	0.178	0.213	4.85391e-15
HMGN1	2.69324e-19	-0.156641	0.156	0.226	4.86589e-15
SRSF8	2.72818e-19	0.237134	0.147	0.173	4.929e-15
LIMK1	2.74642e-19	-0.297261	0.105	0.17	4.96195e-15
CAPN1	2.77229e-19	-0.319489	0.078	0.139	5.0087e-15
ORC4	2.82686e-19	0.357881	0.177	0.19	5.10729e-15
IGFBP5	2.83086e-19	-1.3546	0.02	0.074	5.11451e-15
ANKFY1	2.85021e-19	-0.449207	0.081	0.149	5.14948e-15
HACD3	2.92685e-19	-0.24398	0.172	0.252	5.28794e-15
CLIP2	2.92889e-19	-0.108894	0.14	0.199	5.29162e-15
VGF	2.95358e-19	0.332275	0.304	0.297	5.33623e-15
SEZ6	2.98186e-19	-0.572727	0.062	0.129	5.38732e-15
SQLE	2.98222e-19	0.212491	0.202	0.236	5.38798e-15
PIP4K2B	2.99791e-19	-0.149975	0.173	0.248	5.41632e-15
DMTN	3.01815e-19	-0.48508	0.089	0.158	5.45289e-15
TTC37	3.0279e-19	0.12553	0.155	0.194	5.4705e-15
CYTH2	3.06898e-19	-0.111754	0.216	0.295	5.54473e-15
PRPF3	3.07166e-19	0.470585	0.161	0.159	5.54956e-15
MTHFD2	3.07999e-19	0.667036	0.128	0.113	5.56462e-15
ERCC1	3.08213e-19	0.171543	0.189	0.222	5.56848e-15
ARRDC3	3.08231e-19	0.220072	0.425	0.464	5.56881e-15
TCERG1	3.14262e-19	0.26659	0.31	0.332	5.67777e-15
ZNF154	3.21955e-19	-0.968882	0.034	0.091	5.81677e-15
KCND3	3.21992e-19	-1.5868	0.011	0.058	5.81744e-15
AAMP	3.24718e-19	0.245687	0.266	0.291	5.86668e-15
RAB8B	3.26739e-19	-0.296159	0.064	0.113	5.9032e-15
SHH	3.2723e-19	-1.7372	0.017	0.072	5.91206e-15
PLPP3	3.29083e-19	-1.61074	0.028	0.096	5.94554e-15
BASP1	3.29947e-19	-0.147017	0.538	0.669	5.96115e-15
PPP2R5E	3.31931e-19	-0.218332	0.168	0.248	5.99699e-15
UBA5	3.33179e-19	0.311578	0.161	0.173	6.01955e-15
NUCB2	3.43572e-19	0.361747	0.229	0.228	6.20732e-15
YTHDF2	3.44072e-19	-0.112699	0.177	0.248	6.21635e-15
SMG5	3.44178e-19	0.292024	0.144	0.17	6.21827e-15
DMTF1	3.50214e-19	0.103968	0.222	0.27	6.32731e-15
EP300	3.56612e-19	0.160567	0.181	0.22	6.44292e-15
CFL1	3.66692e-19	-0.216719	0.433	0.564	6.62502e-15
GRIA2	3.76911e-19	0.228607	0.306	0.362	6.80965e-15
MORC3	3.85075e-19	0.109027	0.128	0.172	6.95715e-15
SLC44A5	3.87269e-19	-0.383342	0.05	0.1	6.9968e-15
VHL	3.90633e-19	-0.290329	0.213	0.309	7.05757e-15
ELP1	3.91899e-19	0.33926	0.157	0.176	7.08043e-15
TBC1D7	3.98642e-19	-0.293669	0.107	0.17	7.20226e-15
RAB3A	4.00947e-19	0.109843	0.284	0.334	7.24391e-15
SARM1	4.04402e-19	-0.41673	0.076	0.134	7.30634e-15
ACLY	4.0481e-19	-0.424773	0.073	0.136	7.31369e-15
DNAJB2	4.11289e-19	0.327383	0.222	0.236	7.43076e-15
N4BP2L2	4.13447e-19	0.328754	0.251	0.256	7.46975e-15
ZNF638	4.18435e-19	-0.213339	0.231	0.322	7.55987e-15
ZNF397	4.23595e-19	0.130409	0.172	0.211	7.6531e-15
GSE1	4.2471e-19	-0.172201	0.155	0.221	7.67324e-15
NAALAD2	4.33609e-19	-0.373057	0.084	0.147	7.83401e-15
CPEB2	4.53509e-19	-0.54607	0.076	0.143	8.19355e-15
GPATCH2L	4.55402e-19	0.290989	0.239	0.258	8.22775e-15
PSD3	4.83284e-19	-0.104586	0.097	0.148	8.7315e-15
PTPRN	5.00191e-19	0.179158	0.238	0.27	9.03695e-15
FAM32A	5.11311e-19	-0.15182	0.181	0.258	9.23786e-15
SCAMP3	5.22502e-19	0.573975	0.145	0.127	9.44005e-15
NR2F1	5.22646e-19	-0.806757	0.042	0.102	9.44265e-15
PYURF	5.35989e-19	0.196292	0.18	0.211	9.68372e-15
CDO1	5.36894e-19	-0.13848	0.113	0.169	9.70006e-15
ANK2	5.41287e-19	-0.123843	0.175	0.25	9.77942e-15
TOMM40	5.66238e-19	0.381673	0.179	0.179	1.02302e-14
HNRNPA3	5.71062e-19	-0.216187	0.159	0.237	1.03174e-14
FAM162A	5.72699e-19	0.455164	0.263	0.237	1.0347e-14
PRAF2	5.99723e-19	0.210399	0.181	0.203	1.08352e-14
C12orf75	6.00533e-19	-0.668119	0.113	0.202	1.08498e-14
APPL1	6.05649e-19	0.332529	0.167	0.181	1.09423e-14
SLC43A2	6.17097e-19	0.177076	0.176	0.203	1.11491e-14
COPS3	6.17736e-19	0.21908	0.202	0.218	1.11606e-14
LARP4	6.20569e-19	0.312956	0.185	0.2	1.12118e-14
LAMTOR1	6.30798e-19	0.145345	0.259	0.297	1.13966e-14
MOGS	6.3929e-19	0.425523	0.157	0.153	1.155e-14
CCDC184	6.4585e-19	-0.478901	0.046	0.098	1.16686e-14
PDHA1	6.47868e-19	0.140143	0.249	0.285	1.1705e-14
MAP1A	6.57342e-19	-0.12024	0.156	0.222	1.18762e-14
BICDL1	6.71478e-19	-0.104193	0.134	0.191	1.21316e-14
MYO16	6.73448e-19	-0.802332	0.054	0.123	1.21672e-14
PSMD12	6.75952e-19	0.324425	0.188	0.198	1.22124e-14
ASAH1	6.76797e-19	0.69908	0.122	0.105	1.22277e-14
C9orf72	6.86607e-19	0.453387	0.171	0.175	1.24049e-14
GABRG3	6.95822e-19	-1.08314	0.017	0.06	1.25714e-14
DEGS1	6.98549e-19	0.143481	0.152	0.184	1.26207e-14
RAB22A	7.01671e-19	0.175675	0.086	0.115	1.26771e-14
ATN1	7.02752e-19	-0.118206	0.448	0.562	1.26966e-14
GABRB2	7.14054e-19	-0.669678	0.089	0.17	1.29008e-14
PANK3	7.16831e-19	0.241829	0.222	0.253	1.2951e-14
PALM	7.2405e-19	-0.312576	0.113	0.184	1.30814e-14
TET2	7.36312e-19	0.103957	0.151	0.193	1.3303e-14
SHANK1	7.44237e-19	-0.145405	0.095	0.148	1.34461e-14
TMUB2	7.52554e-19	0.297042	0.174	0.195	1.35964e-14
BAG6	7.69866e-19	-0.181826	0.22	0.303	1.39092e-14
LSM1	7.88565e-19	0.246855	0.101	0.121	1.4247e-14
PAIP2	7.90487e-19	0.127773	0.118	0.149	1.42817e-14
TP53I11	7.93216e-19	0.271247	0.135	0.166	1.4331e-14
MMP24OS	8.06921e-19	0.14294	0.144	0.174	1.45786e-14
FAM131B	8.11773e-19	-0.375276	0.063	0.119	1.46663e-14
SARS	8.14237e-19	0.337779	0.121	0.132	1.47108e-14
RTL8C	8.47334e-19	-0.122654	0.26	0.348	1.53088e-14
PPM1A	8.5402e-19	0.243565	0.192	0.224	1.54296e-14
LMNB1	8.60815e-19	-0.29293	0.143	0.227	1.55523e-14
TMEM68	8.67765e-19	0.192846	0.206	0.236	1.56779e-14
MAGED1	8.77072e-19	-0.257747	0.602	0.748	1.58461e-14
DHX15	8.8083e-19	0.150346	0.239	0.293	1.5914e-14
PATZ1	8.90385e-19	-0.250548	0.089	0.144	1.60866e-14
PI4KA	9.00368e-19	-0.171201	0.126	0.184	1.62669e-14
HINT1	9.00546e-19	-0.182553	0.13	0.191	1.62702e-14
GLG1	9.02294e-19	0.220607	0.144	0.172	1.63018e-14
PPME1	9.21875e-19	0.212519	0.194	0.222	1.66555e-14
NELFA	9.38794e-19	0.115318	0.147	0.184	1.69612e-14
MT-CO2	9.40326e-19	-0.223086	0.88	0.943	1.69889e-14
OXNAD1	9.64013e-19	0.598177	0.145	0.125	1.74168e-14
PUF60	9.81873e-19	-0.206422	0.205	0.289	1.77395e-14
SQSTM1	9.89101e-19	0.297567	0.229	0.241	1.78701e-14
YIPF2	9.93743e-19	0.561261	0.162	0.143	1.7954e-14
ACAT2	9.96933e-19	-0.427663	0.1	0.175	1.80116e-14
CLIC4	1.01776e-18	-0.101151	0.142	0.201	1.83879e-14
PIKFYVE	1.0351e-18	0.333551	0.117	0.13	1.87011e-14
GPBP1	1.03593e-18	0.235992	0.237	0.271	1.87162e-14
SAFB2	1.06127e-18	0.367815	0.161	0.172	1.9174e-14
PCSK1N	1.08119e-18	-0.201083	0.39	0.508	1.95339e-14
SLC25A46	1.08388e-18	0.151221	0.15	0.176	1.95825e-14
NEDD8	1.1012e-18	0.246547	0.155	0.176	1.98954e-14
KLHDC8A	1.10743e-18	-1.28541	0.027	0.085	2.00079e-14
CD151	1.1282e-18	-0.350911	0.087	0.145	2.03832e-14
ZNF768	1.1296e-18	0.154396	0.147	0.174	2.04085e-14
CASC4	1.14585e-18	-0.322103	0.14	0.218	2.0702e-14
ZNF423	1.16446e-18	-0.430492	0.091	0.155	2.10383e-14
SCAP	1.1781e-18	0.170119	0.162	0.194	2.12847e-14
DMXL2	1.19969e-18	0.110819	0.177	0.221	2.16748e-14
PDCD7	1.21863e-18	0.257862	0.111	0.131	2.20171e-14
RHBDD2	1.22852e-18	-0.129958	0.343	0.441	2.21958e-14
CDC16	1.2317e-18	0.178136	0.184	0.215	2.22531e-14
ZNF445	1.23442e-18	-0.1946	0.113	0.178	2.23022e-14
GDF11	1.24205e-18	-0.482702	0.081	0.148	2.24401e-14
ANKRD13D	1.24609e-18	-0.128303	0.103	0.157	2.2513e-14
MSL2	1.25181e-18	0.205663	0.142	0.172	2.26165e-14
NECTIN1	1.27648e-18	-0.258514	0.243	0.34	2.30621e-14
NADK2	1.29215e-18	0.531368	0.163	0.152	2.33453e-14
TSPAN14	1.29555e-18	-0.510099	0.051	0.109	2.34068e-14
SLC9A6	1.32551e-18	-0.279707	0.081	0.141	2.3948e-14
RUNX1T1	1.34076e-18	-0.232428	0.222	0.318	2.42235e-14
UBC	1.3551e-18	0.14021	0.193	0.234	2.44826e-14
PXK	1.44694e-18	0.589324	0.111	0.104	2.61419e-14
RTL8A	1.45112e-18	-0.117204	0.095	0.142	2.62173e-14
PSMD6	1.48778e-18	-0.11766	0.151	0.216	2.68797e-14
COX14	1.49702e-18	0.423823	0.223	0.215	2.70467e-14
PITPNM1	1.51319e-18	-0.277316	0.099	0.159	2.73388e-14
CLSTN3	1.53909e-18	-0.184738	0.204	0.289	2.78067e-14
TBL1XR1	1.54516e-18	-0.306955	0.109	0.177	2.79164e-14
SH3BGRL	1.55976e-18	-0.245531	0.082	0.14	2.81803e-14
SPIRE1	1.57152e-18	0.325058	0.126	0.14	2.83926e-14
SLC16A2	1.63033e-18	-0.671257	0.051	0.112	2.94551e-14
PPP1R9B	1.65701e-18	-0.329489	0.144	0.225	2.99372e-14
RSPRY1	1.66312e-18	-0.175976	0.144	0.209	3.00476e-14
COX15	1.68587e-18	0.177508	0.097	0.123	3.04586e-14
SSR4	1.68625e-18	0.228448	0.216	0.234	3.04655e-14
SYP	1.7024e-18	-0.301119	0.155	0.236	3.07573e-14
ACOT7	1.74781e-18	-0.216689	0.108	0.173	3.15776e-14
PSMA4	1.75642e-18	0.12324	0.126	0.162	3.17333e-14
TARBP1	1.76566e-18	0.14687	0.164	0.212	3.19001e-14
AKAP8L	1.76745e-18	0.101727	0.224	0.279	3.19325e-14
CAMK2A	1.77378e-18	-0.505693	0.047	0.101	3.20468e-14
CLGN	1.77756e-18	0.67718	0.109	0.093	3.21153e-14
PFKP	1.79089e-18	0.271335	0.178	0.193	3.23561e-14
AGO4	1.81062e-18	-0.144235	0.077	0.129	3.27125e-14
MRTFA	1.82563e-18	0.168267	0.149	0.18	3.29836e-14
SLC5A3	1.83054e-18	-0.37743	0.109	0.186	3.30724e-14
EPC2	1.86667e-18	0.156653	0.121	0.148	3.37252e-14
MAGI1	1.86951e-18	-0.198263	0.105	0.164	3.37764e-14
SMAD4	1.88743e-18	0.124416	0.182	0.217	3.41003e-14
EGLN1	1.89549e-18	0.113643	0.221	0.262	3.42458e-14
BCL2L1	1.92153e-18	-0.170594	0.183	0.258	3.47163e-14
WDR27	1.93683e-18	0.302341	0.117	0.136	3.49927e-14
LRP11	1.951e-18	0.248339	0.142	0.168	3.52486e-14
LMO1	1.96218e-18	-0.47573	0.102	0.182	3.54508e-14
BACH1	1.96778e-18	0.34121	0.227	0.239	3.55519e-14
ABHD16A	1.98803e-18	0.212829	0.172	0.194	3.59178e-14
KDM1B	2.00128e-18	0.507762	0.074	0.078	3.61571e-14
CREB3	2.06771e-18	0.324009	0.276	0.272	3.73573e-14
DYNC1LI1	2.06826e-18	0.102781	0.138	0.173	3.73673e-14
MED12	2.08683e-18	-0.423807	0.048	0.099	3.77028e-14
TMED4	2.09224e-18	0.119307	0.212	0.25	3.78005e-14
SMIM14	2.13198e-18	0.124274	0.14	0.172	3.85185e-14
P4HTM	2.14271e-18	-0.172992	0.141	0.204	3.87124e-14
RCOR2	2.17232e-18	0.107714	0.118	0.157	3.92474e-14
KRT10	2.18873e-18	0.51795	0.162	0.146	3.95437e-14
KDM6B	2.21246e-18	-0.316073	0.11	0.177	3.99726e-14
RNF41	2.24593e-18	0.17533	0.126	0.153	4.05772e-14
AEBP2	2.26431e-18	0.180431	0.222	0.256	4.09093e-14
ZCCHC7	2.26515e-18	0.613948	0.196	0.169	4.09245e-14
TRAPPC9	2.28076e-18	-0.189213	0.128	0.192	4.12065e-14
USF2	2.30928e-18	-0.164449	0.142	0.209	4.17217e-14
CCDC136	2.32865e-18	-0.233451	0.134	0.203	4.20717e-14
TMEM263	2.35013e-18	0.228912	0.255	0.275	4.24598e-14
FAM171B	2.35695e-18	0.166654	0.218	0.258	4.2583e-14
TMEM18	2.36388e-18	0.214978	0.055	0.08	4.27082e-14
UBA6	2.43103e-18	0.109325	0.172	0.212	4.39214e-14
SPINT2	2.46409e-18	0.210519	0.221	0.251	4.45187e-14
MYO10	2.47514e-18	-0.574412	0.034	0.078	4.47183e-14
KIAA0232	2.52628e-18	0.217123	0.106	0.129	4.56424e-14
RNF157	2.56173e-18	0.312204	0.175	0.198	4.62827e-14
FDFT1	2.60235e-18	0.171514	0.185	0.233	4.70167e-14
RHPN1	2.67608e-18	-0.332934	0.066	0.117	4.83488e-14
ATRAID	2.68901e-18	0.295265	0.171	0.177	4.85824e-14
COX5B	2.70464e-18	0.345758	0.118	0.126	4.88647e-14
COPA	2.71478e-18	0.239745	0.405	0.423	4.9048e-14
SCN3B	2.73321e-18	-0.248255	0.353	0.471	4.93808e-14
LEMD2	2.76247e-18	0.216971	0.14	0.17	4.99096e-14
MTERF4	2.81666e-18	0.191173	0.126	0.155	5.08887e-14
TTL	2.82271e-18	-0.369377	0.09	0.157	5.09979e-14
IGFBP2	2.88043e-18	0.265411	0.681	0.643	5.20407e-14
HEXA	2.89649e-18	-0.236744	0.109	0.166	5.23308e-14
ATP2B1	2.90726e-18	-0.363681	0.108	0.178	5.25254e-14
PAK1IP1	2.92468e-18	0.721137	0.11	0.094	5.28403e-14
YKT6	2.96443e-18	0.245181	0.433	0.442	5.35584e-14
ID4	2.97667e-18	-0.282391	0.235	0.336	5.37795e-14
SIAH1	2.98535e-18	0.154712	0.136	0.173	5.39364e-14
L3MBTL1	2.99258e-18	-0.507495	0.064	0.124	5.40669e-14
NDUFS3	3.02087e-18	-0.160737	0.151	0.222	5.4578e-14
PRNP	3.0493e-18	0.207085	0.23	0.259	5.50918e-14
CHGB	3.06085e-18	-0.39284	0.145	0.228	5.53003e-14
PRRC2C	3.06851e-18	0.169987	0.257	0.288	5.54388e-14
CUEDC1	3.08574e-18	-0.785612	0.052	0.113	5.57501e-14
NSD1	3.09974e-18	-0.359794	0.055	0.103	5.6003e-14
MCRIP1	3.1052e-18	-0.130637	0.225	0.299	5.61016e-14
TMCO1	3.15718e-18	0.293198	0.25	0.25	5.70409e-14
GRK3	3.15893e-18	0.102497	0.158	0.2	5.70724e-14
PSME1	3.20285e-18	-0.343624	0.074	0.128	5.7866e-14
SUDS3	3.28467e-18	0.200362	0.117	0.15	5.93442e-14
SAMM50	3.29022e-18	0.267071	0.119	0.137	5.94443e-14
STMP1	3.32262e-18	-0.113105	0.197	0.268	6.00298e-14
DNTTIP2	3.43539e-18	0.362811	0.144	0.152	6.20672e-14
ARMC8	3.44476e-18	0.123999	0.158	0.2	6.22365e-14
ZSWIM8	3.47067e-18	0.210586	0.222	0.251	6.27046e-14
POLR2K	3.5181e-18	0.224968	0.181	0.205	6.35615e-14
NABP2	3.52095e-18	0.345647	0.188	0.198	6.36131e-14
SAFB	3.59584e-18	0.146605	0.205	0.236	6.4966e-14
NDUFA2	3.60348e-18	0.174772	0.245	0.273	6.5104e-14
SEC13	3.61516e-18	0.251173	0.298	0.303	6.53151e-14
GPR27	3.62324e-18	-0.193266	0.102	0.154	6.5461e-14
PDE4D	3.63698e-18	-0.456577	0.095	0.169	6.57093e-14
GLCE	3.68479e-18	-0.634137	0.115	0.207	6.65731e-14
NAA40	3.76304e-18	-0.131555	0.074	0.119	6.79869e-14
NRXN1	3.76566e-18	-0.222774	0.205	0.296	6.80342e-14
PPIL4	3.82346e-18	0.531506	0.155	0.152	6.90785e-14
CERS6	3.9478e-18	-0.31412	0.151	0.227	7.1325e-14
SCP2	3.95921e-18	0.166656	0.118	0.148	7.15311e-14
CXCR4	4.08777e-18	-0.833458	0.062	0.134	7.38538e-14
PPP1R10	4.15766e-18	0.25258	0.179	0.203	7.51164e-14
SNX27	4.16838e-18	-0.161002	0.124	0.184	7.53102e-14
NCOA1	4.19346e-18	-0.296327	0.077	0.128	7.57633e-14
EML5	4.22101e-18	-0.487141	0.077	0.145	7.62609e-14
SLC1A5	4.22471e-18	0.658149	0.148	0.122	7.63278e-14
MICU2	4.28731e-18	0.181248	0.209	0.24	7.74588e-14
CUX1	4.29056e-18	-0.391033	0.107	0.179	7.75175e-14
FNBP1	4.30183e-18	-0.229622	0.098	0.157	7.77211e-14
2024-03-04	4.30617e-18	-0.612921	0.044	0.102	7.77996e-14
CFAP20	4.3071e-18	0.166262	0.218	0.245	7.78163e-14
SEPHS2	4.33399e-18	0.517735	0.147	0.131	7.83022e-14
RIMKLA	4.34607e-18	0.274721	0.062	0.079	7.85205e-14
GTF2H5	4.37734e-18	0.415905	0.169	0.166	7.90853e-14
BICD1	4.50684e-18	0.350803	0.156	0.173	8.14251e-14
ATP5IF1	4.51176e-18	0.151341	0.156	0.186	8.15139e-14
POLI	4.62697e-18	0.364763	0.17	0.176	8.35956e-14
CLPTM1L	4.65394e-18	0.27892	0.143	0.16	8.40827e-14
DDX49	4.68392e-18	0.402514	0.149	0.157	8.46244e-14
EMC4	4.69493e-18	0.11629	0.29	0.327	8.48233e-14
HS2ST1	4.92968e-18	-0.337729	0.095	0.151	8.90645e-14
NKAIN1	4.93409e-18	-0.432988	0.103	0.176	8.91442e-14
NTRK1	4.93914e-18	-1.20352	0.027	0.08	8.92354e-14
RPP21	4.96319e-18	0.117901	0.159	0.194	8.96699e-14
TTC17	4.98646e-18	0.4383	0.194	0.187	9.00903e-14
PPM1E	5.07551e-18	-0.737947	0.048	0.113	9.16992e-14
KMT5B	5.09499e-18	-0.268922	0.161	0.242	9.20511e-14
SEC62	5.1298e-18	0.114059	0.306	0.347	9.26802e-14
TAB2	5.20516e-18	0.243941	0.148	0.167	9.40417e-14
PPP1R15B	5.20863e-18	0.436523	0.223	0.216	9.41044e-14
ZNF254	5.21334e-18	-0.292117	0.149	0.227	9.41895e-14
LRRC41	5.22256e-18	0.165735	0.185	0.219	9.4356e-14
MAP3K7	5.41629e-18	0.138433	0.136	0.166	9.78561e-14
SENP7	5.52488e-18	-0.173452	0.11	0.166	9.9818e-14
ABHD17B	5.69542e-18	0.135501	0.106	0.131	1.02899e-13
SLC23A2	5.87515e-18	0.15849	0.132	0.163	1.06146e-13
GRAMD4	5.91015e-18	-0.596811	0.042	0.092	1.06779e-13
ANAPC5	5.96694e-18	0.306068	0.185	0.201	1.07805e-13
NUP153	6.01079e-18	0.10981	0.179	0.213	1.08597e-13
WDTC1	6.01095e-18	0.24343	0.144	0.162	1.086e-13
AAK1	6.06314e-18	0.273465	0.185	0.203	1.09543e-13
TUT7	6.13521e-18	0.33654	0.132	0.142	1.10845e-13
PHIP	6.22305e-18	-0.265866	0.149	0.222	1.12432e-13
FUBP1	6.32058e-18	-0.184825	0.151	0.219	1.14194e-13
DAB2IP	6.41564e-18	-0.18664	0.101	0.161	1.15911e-13
SLC25A29	6.66861e-18	-0.22933	0.116	0.183	1.20482e-13
C11orf24	6.78127e-18	0.708307	0.14	0.109	1.22517e-13
TMEM74B	6.90736e-18	-0.174077	0.087	0.14	1.24795e-13
HNRNPUL2	6.91727e-18	0.146279	0.212	0.256	1.24974e-13
UQCC2	7.04765e-18	0.149893	0.17	0.203	1.2733e-13
NFXL1	7.09778e-18	0.341936	0.112	0.127	1.28236e-13
PPP1R26	7.21138e-18	-0.267701	0.067	0.116	1.30288e-13
PRPF6	7.42643e-18	0.256639	0.264	0.285	1.34173e-13
NAA15	7.5661e-18	0.41066	0.162	0.164	1.36697e-13
CLDN12	7.62011e-18	0.128074	0.15	0.184	1.37672e-13
DUSP11	7.69898e-18	0.392951	0.145	0.15	1.39097e-13
TIPRL	7.7171e-18	0.190064	0.268	0.294	1.39425e-13
PA2G4	7.77908e-18	0.19982	0.168	0.199	1.40545e-13
DNAJC25	8.00126e-18	0.680755	0.149	0.123	1.44559e-13
MCM4	8.1893e-18	-0.200497	0.083	0.127	1.47956e-13
TNRC6C	8.25098e-18	-0.23195	0.173	0.254	1.4907e-13
ITM2C	8.39448e-18	-0.631299	0.19	0.308	1.51663e-13
FSCN1	8.42564e-18	-0.127327	0.18	0.251	1.52226e-13
CMAS	8.46806e-18	0.276028	0.143	0.166	1.52992e-13
SEMA6B	8.5332e-18	-0.265577	0.118	0.18	1.54169e-13
ARL4C	8.72971e-18	-0.857759	0.045	0.113	1.5772e-13
ATP1A3	8.88627e-18	0.167921	0.423	0.47	1.60548e-13
HIGD2A	8.92744e-18	0.13372	0.132	0.169	1.61292e-13
TM9SF3	9.21029e-18	0.198034	0.306	0.322	1.66402e-13
RBM27	9.51238e-18	0.292375	0.157	0.17	1.7186e-13
PLS3	9.56684e-18	-1.21437	0.044	0.113	1.72844e-13
GABRA2	9.79929e-18	-0.415698	0.132	0.214	1.77044e-13
CLCN4	9.88727e-18	0.147533	0.094	0.125	1.78633e-13
MEGF8	1.01111e-17	-0.343495	0.11	0.177	1.82678e-13
CD2BP2	1.04189e-17	-0.126011	0.085	0.13	1.88239e-13
GARS	1.04192e-17	0.534989	0.155	0.139	1.88244e-13
AMN1	1.04393e-17	0.189082	0.13	0.16	1.88607e-13
FZD5	1.05283e-17	-1.0947	0.029	0.085	1.90215e-13
PIK3R2	1.07548e-17	0.176537	0.165	0.192	1.94307e-13
B4GALT7	1.08425e-17	0.246723	0.1	0.117	1.95891e-13
CTDNEP1	1.11129e-17	0.115814	0.16	0.191	2.00777e-13
PFN2	1.16709e-17	-0.271517	0.404	0.532	2.10858e-13
NUS1	1.16958e-17	0.334566	0.204	0.212	2.11308e-13
MOAP1	1.17476e-17	0.238324	0.244	0.269	2.12243e-13
FAM169A	1.17792e-17	-0.369228	0.077	0.136	2.12814e-13
UNC13A	1.18413e-17	0.318633	0.169	0.181	2.13937e-13
RAP2A	1.18554e-17	-0.140043	0.104	0.159	2.14192e-13
CLPP	1.18954e-17	0.388448	0.22	0.219	2.14914e-13
AP1M1	1.1976e-17	0.121752	0.243	0.282	2.1637e-13
DESI1	1.20182e-17	-0.502738	0.057	0.111	2.17133e-13
PANX1	1.21622e-17	-0.127231	0.13	0.184	2.19734e-13
AMFR	1.24106e-17	-0.115403	0.095	0.139	2.24223e-13
BAZ2B	1.26422e-17	-0.314781	0.14	0.222	2.28407e-13
GAREM2	1.26685e-17	-0.165833	0.065	0.111	2.28882e-13
TSPAN3	1.28164e-17	-0.100118	0.423	0.525	2.31554e-13
NUP107	1.2819e-17	0.335812	0.091	0.105	2.31601e-13
GBA2	1.31172e-17	-0.314673	0.05	0.094	2.36989e-13
RTF2	1.32538e-17	0.247588	0.126	0.138	2.39457e-13
FAM136A	1.32976e-17	0.431287	0.085	0.087	2.40248e-13
COL4A5	1.33366e-17	-1.20201	0.011	0.052	2.40952e-13
GOLGA7B	1.34755e-17	-0.431315	0.051	0.105	2.43461e-13
SRPRA	1.3487e-17	0.503928	0.123	0.115	2.4367e-13
CENPT	1.35138e-17	-0.113299	0.096	0.142	2.44155e-13
PITRM1	1.40863e-17	0.168667	0.15	0.176	2.54498e-13
RHOBTB2	1.44137e-17	-0.363763	0.075	0.131	2.60412e-13
SMPD4	1.46148e-17	0.245064	0.126	0.15	2.64046e-13
CCND1	1.51246e-17	-0.563612	0.057	0.114	2.73256e-13
FAM229B	1.54961e-17	0.411783	0.151	0.149	2.79968e-13
SSBP3	1.55062e-17	-0.168107	0.191	0.267	2.8015e-13
KMT2D	1.55483e-17	-0.522809	0.089	0.157	2.80911e-13
DNAJA3	1.55692e-17	0.549409	0.154	0.141	2.81289e-13
GAB2	1.58424e-17	-0.277384	0.084	0.142	2.86225e-13
LMTK3	1.61282e-17	0.142121	0.175	0.215	2.91389e-13
ACTL6B	1.61432e-17	-0.375818	0.097	0.169	2.91659e-13
ENTPD6	1.61695e-17	0.272218	0.153	0.175	2.92135e-13
FJX1	1.62549e-17	-0.457158	0.035	0.077	2.93678e-13
FAM214A	1.6434e-17	0.124314	0.114	0.145	2.96914e-13
SMARCC1	1.67691e-17	-0.170857	0.202	0.279	3.02967e-13
SYVN1	1.68066e-17	0.378936	0.126	0.136	3.03645e-13
ETV1	1.68335e-17	-0.916987	0.047	0.109	3.04131e-13
CASTOR2	1.69045e-17	-0.31625	0.132	0.208	3.05414e-13
ADD1	1.69592e-17	0.132924	0.257	0.305	3.06402e-13
CDC73	1.71365e-17	0.138844	0.147	0.174	3.09606e-13
GHITM	1.75663e-17	0.28116	0.177	0.188	3.1737e-13
SEC61B	1.7635e-17	0.362827	0.212	0.208	3.18612e-13
GOLGA8B	1.77494e-17	-0.316438	0.089	0.144	3.20678e-13
GSK3B	1.78476e-17	0.116613	0.141	0.178	3.22453e-13
ULK1	1.78886e-17	-0.173757	0.097	0.148	3.23192e-13
MON2	1.8154e-17	0.27781	0.151	0.166	3.27989e-13
TMEM65	1.87846e-17	-0.289213	0.086	0.14	3.39381e-13
DRAM2	1.89774e-17	0.301095	0.103	0.119	3.42865e-13
RPAIN	1.99364e-17	-0.232305	0.142	0.213	3.60192e-13
SERF2	2.03723e-17	0.283954	0.273	0.278	3.68067e-13
FASTKD2	2.09487e-17	0.42338	0.118	0.126	3.78481e-13
GP1BB	2.11181e-17	-0.648907	0.057	0.122	3.81541e-13
OPA1	2.12712e-17	0.205358	0.153	0.175	3.84307e-13
MKRN2	2.1487e-17	0.529816	0.141	0.137	3.88205e-13
HNRNPC	2.16428e-17	0.168636	0.212	0.245	3.91021e-13
TMEM35A	2.24468e-17	0.312032	0.229	0.261	4.05547e-13
WASF3	2.24734e-17	-0.156698	0.12	0.178	4.06026e-13
TPD52L2	2.28242e-17	0.229891	0.227	0.245	4.12365e-13
CEBPG	2.28755e-17	0.234434	0.199	0.217	4.13292e-13
RALGDS	2.29551e-17	-0.336208	0.078	0.129	4.1473e-13
MED4	2.31353e-17	0.297925	0.106	0.122	4.17985e-13
TTBK2	2.32043e-17	0.387815	0.128	0.142	4.19232e-13
GON4L	2.38935e-17	0.410796	0.16	0.156	4.31684e-13
TRIM36	2.397e-17	-0.167176	0.097	0.153	4.33066e-13
MARK2	2.53396e-17	-0.202457	0.079	0.129	4.5781e-13
ZNF219	2.55673e-17	-0.4859	0.071	0.13	4.61924e-13
HSP90B1	2.61146e-17	0.634422	0.093	0.088	4.71812e-13
ZNF559	2.67434e-17	0.18547	0.121	0.146	4.83173e-13
TRIM23	2.70428e-17	0.448091	0.143	0.146	4.88581e-13
PCNX4	2.72898e-17	-0.214604	0.105	0.164	4.93045e-13
TOMM22	2.72908e-17	0.116297	0.103	0.132	4.93062e-13
SAP18	2.74341e-17	0.147144	0.272	0.309	4.95652e-13
GTF2A2	2.75646e-17	-0.1516	0.124	0.178	4.98009e-13
SCYL2	2.7633e-17	-0.246204	0.099	0.15	4.99245e-13
MASP1	2.79085e-17	-0.923126	0.021	0.063	5.04224e-13
N4BP2	2.80863e-17	-0.212276	0.147	0.222	5.07434e-13
BCCIP	2.84172e-17	0.287067	0.167	0.176	5.13413e-13
CREBBP	2.84363e-17	-0.130321	0.148	0.211	5.13758e-13
EIF3B	2.86858e-17	0.229757	0.218	0.235	5.18266e-13
ADRM1	2.87079e-17	0.245439	0.187	0.208	5.18666e-13
BCL2L13	2.88571e-17	0.300916	0.19	0.197	5.21361e-13
SCMH1	2.8942e-17	0.35653	0.106	0.118	5.22894e-13
RAPGEF2	2.92577e-17	0.121098	0.133	0.168	5.28599e-13
PSMC4	2.9572e-17	0.155036	0.238	0.266	5.34278e-13
DLG1	2.96994e-17	0.202333	0.115	0.143	5.3658e-13
IPO9	2.98849e-17	-0.211805	0.147	0.223	5.39931e-13
TRIM8	3.0225e-17	0.213738	0.126	0.148	5.46074e-13
MKLN1	3.08725e-17	0.279555	0.163	0.183	5.57774e-13
RAB5A	3.13522e-17	0.28347	0.188	0.203	5.6644e-13
TRIM13	3.19405e-17	-0.379931	0.083	0.14	5.77069e-13
NEURL1	3.21158e-17	-0.462168	0.087	0.155	5.80235e-13
MAP4K5	3.21545e-17	0.210344	0.219	0.245	5.80935e-13
TMEM9	3.27189e-17	0.171607	0.279	0.316	5.91132e-13
NDUFS6	3.28168e-17	0.171034	0.137	0.168	5.92901e-13
EMG1	3.31592e-17	0.56214	0.163	0.149	5.99087e-13
CALU	3.3542e-17	0.297854	0.253	0.259	6.06004e-13
HACE1	3.44284e-17	0.134347	0.111	0.146	6.22018e-13
ARHGAP5	3.55699e-17	0.223992	0.142	0.165	6.42641e-13
DCUN1D4	3.57572e-17	0.348201	0.142	0.148	6.46025e-13
SUGT1	3.57625e-17	0.12634	0.28	0.32	6.46121e-13
CNPY3	3.58296e-17	0.510772	0.136	0.127	6.47333e-13
PTMS	3.59215e-17	-0.567378	0.148	0.249	6.48993e-13
DCTN6	3.62288e-17	-0.24701	0.107	0.166	6.54545e-13
MTURN	3.63342e-17	0.234102	0.18	0.211	6.56449e-13
SUPT7L	3.65764e-17	0.304034	0.112	0.127	6.60825e-13
DTX1	3.66554e-17	-0.664622	0.073	0.146	6.62252e-13
NT5C3B	3.68324e-17	-0.249022	0.134	0.196	6.65452e-13
ZDHHC21	3.69471e-17	-0.246216	0.118	0.182	6.67523e-13
SH3GLB2	3.70873e-17	-0.417264	0.089	0.153	6.70055e-13
ZKSCAN7	3.72672e-17	-0.125632	0.063	0.1	6.73307e-13
FOXO6	3.7852e-17	-0.522491	0.056	0.114	6.83873e-13
VLDLR	3.78534e-17	0.287312	0.119	0.131	6.83897e-13
VEZF1	3.81308e-17	-0.37366	0.094	0.16	6.88909e-13
CLPTM1	3.81396e-17	0.217124	0.27	0.293	6.89068e-13
RNF144A	3.86008e-17	-0.570508	0.06	0.119	6.97401e-13
ATPAF1	3.87063e-17	0.179008	0.148	0.176	6.99307e-13
EEF1G	3.93675e-17	0.123377	0.526	0.594	7.11253e-13
FMNL2	3.95706e-17	0.230899	0.1	0.125	7.14922e-13
CLASP1	3.96061e-17	-0.194206	0.149	0.218	7.15563e-13
SMAD2	3.98227e-17	0.136463	0.13	0.167	7.19476e-13
APLP1	4.00605e-17	-0.116721	0.462	0.577	7.23773e-13
BMERB1	4.10461e-17	-0.150218	0.13	0.192	7.41579e-13
CTSB	4.19801e-17	-0.121457	0.17	0.235	7.58455e-13
MAB21L1	4.22746e-17	3.42989	0.023	0.003	7.63776e-13
ZNF32	4.32628e-17	-0.457222	0.069	0.121	7.8163e-13
ARL5B	4.33156e-17	0.202769	0.122	0.141	7.82584e-13
RTRAF	4.38774e-17	0.437521	0.155	0.15	7.92733e-13
WDFY3	4.46896e-17	-0.336637	0.111	0.177	8.07407e-13
SRP72	4.49861e-17	0.31533	0.097	0.109	8.12763e-13
PRRT2	4.50917e-17	-0.145388	0.179	0.247	8.14672e-13
TDRP	4.5515e-17	-0.654779	0.05	0.107	8.22319e-13
CMSS1	4.59074e-17	0.581368	0.136	0.119	8.29408e-13
KIAA0895L	4.59161e-17	-0.243584	0.175	0.259	8.29565e-13
CCT4	4.66192e-17	0.277875	0.142	0.16	8.42269e-13
ELP3	4.74996e-17	0.372509	0.124	0.135	8.58176e-13
RHNO1	4.79201e-17	-0.185104	0.072	0.122	8.65773e-13
LMF2	4.80942e-17	0.22048	0.132	0.152	8.68918e-13
ANP32E	4.87454e-17	0.321861	0.087	0.103	8.80683e-13
SRSF1	4.89348e-17	0.16687	0.083	0.107	8.84105e-13
UBE3C	4.89959e-17	0.135483	0.133	0.164	8.85209e-13
HNRNPK	4.94693e-17	-0.393918	0.069	0.126	8.93762e-13
TMEM205	4.94798e-17	0.461506	0.195	0.177	8.93951e-13
PLXNA2	5.06169e-17	-0.379913	0.094	0.164	9.14496e-13
FAM172A	5.11571e-17	-0.147801	0.067	0.115	9.24255e-13
BTAF1	5.18827e-17	0.201076	0.184	0.208	9.37365e-13
SEC22A	5.18868e-17	0.521004	0.136	0.128	9.37438e-13
IWS1	5.22265e-17	0.173791	0.086	0.112	9.43577e-13
NRAS	5.2908e-17	-0.233665	0.09	0.144	9.5589e-13
PRDX4	5.31707e-17	0.720808	0.166	0.131	9.60635e-13
ZNF580	5.32489e-17	0.109303	0.134	0.169	9.62047e-13
C18orf25	5.42337e-17	0.534882	0.11	0.11	9.7984e-13
SEMA6A	5.62182e-17	-0.352237	0.054	0.096	1.01569e-12
EPM2AIP1	5.68084e-17	0.133154	0.231	0.272	1.02636e-12
TIMM10B	5.69488e-17	0.410796	0.162	0.165	1.02889e-12
ERCC6L2	5.75474e-17	-0.315006	0.116	0.181	1.03971e-12
NEXMIF	5.76013e-17	-0.714224	0.052	0.114	1.04068e-12
ATP2A2	5.7693e-17	-0.375002	0.099	0.166	1.04234e-12
RPRD2	5.78921e-17	0.311571	0.146	0.167	1.04594e-12
PPP4R3A	5.79735e-17	0.21639	0.158	0.182	1.04741e-12
CCDC130	5.86939e-17	0.323498	0.108	0.122	1.06042e-12
ADIPOR1	5.92494e-17	0.346521	0.161	0.168	1.07046e-12
KIAA1549L	5.95349e-17	-0.426196	0.043	0.086	1.07562e-12
SARAF	5.95687e-17	0.189779	0.294	0.335	1.07623e-12
SENP3	6.00329e-17	0.25216	0.128	0.145	1.08461e-12
SIVA1	6.15418e-17	0.305261	0.186	0.194	1.11188e-12
TFG	6.20399e-17	0.194807	0.159	0.178	1.12088e-12
SESN1	6.27305e-17	0.882597	0.118	0.085	1.13335e-12
KXD1	6.27785e-17	0.169099	0.136	0.167	1.13422e-12
ZMYM3	6.43657e-17	-0.535813	0.113	0.193	1.1629e-12
GAMT	6.48863e-17	-0.251957	0.057	0.101	1.1723e-12
TRIM41	6.53617e-17	0.254536	0.078	0.095	1.18089e-12
ECD	6.59023e-17	0.33265	0.131	0.138	1.19066e-12
TCF20	6.70921e-17	0.119501	0.112	0.147	1.21215e-12
ZDHHC22	6.76931e-17	-0.905558	0.032	0.082	1.22301e-12
SGSM2	6.88156e-17	-0.29534	0.108	0.171	1.24329e-12
B3GALT5	6.88306e-17	-1.24592	0.017	0.057	1.24356e-12
XPO7	6.88834e-17	0.376419	0.121	0.128	1.24452e-12
CACNA1E	6.96094e-17	-0.436586	0.048	0.096	1.25763e-12
OAZ1	6.97294e-17	0.1506	0.644	0.699	1.2598e-12
ZCCHC14	6.9811e-17	-0.187763	0.088	0.137	1.26128e-12
LRRC59	7.00282e-17	0.395306	0.179	0.175	1.2652e-12
TMEM240	7.36892e-17	-0.494108	0.054	0.11	1.33134e-12
RGP1	7.37552e-17	0.147557	0.099	0.126	1.33253e-12
PAGR1	7.55306e-17	0.182546	0.233	0.262	1.36461e-12
ZNF821	7.66827e-17	-0.285167	0.079	0.136	1.38543e-12
ZNF316	7.68768e-17	0.249232	0.177	0.211	1.38893e-12
PWWP3A	7.7016e-17	-0.120593	0.131	0.187	1.39145e-12
DNAJC7	7.7279e-17	-0.196526	0.171	0.245	1.3962e-12
NIPA1	7.90532e-17	0.100159	0.099	0.126	1.42825e-12
RBMX	8.06809e-17	-0.30772	0.094	0.153	1.45766e-12
PCNX2	8.42207e-17	0.127158	0.209	0.246	1.52162e-12
CAMKV	8.50826e-17	-0.363899	0.118	0.195	1.53719e-12
VARS	8.51404e-17	0.180903	0.192	0.215	1.53823e-12
DNAJB9	8.64672e-17	0.476939	0.196	0.183	1.5622e-12
GNL2	8.78019e-17	0.586838	0.173	0.148	1.58632e-12
CNOT2	8.81307e-17	-0.126547	0.118	0.172	1.59226e-12
LSG1	8.81641e-17	0.554699	0.106	0.099	1.59286e-12
LZIC	8.81798e-17	0.393622	0.151	0.162	1.59314e-12
HERPUD2	8.82496e-17	0.170072	0.108	0.141	1.59441e-12
MAP3K13	8.91732e-17	0.170382	0.16	0.187	1.61109e-12
AKR1A1	8.92333e-17	0.155884	0.204	0.231	1.61218e-12
NYNRIN	8.96778e-17	-0.495793	0.048	0.094	1.62021e-12
CABIN1	8.98515e-17	0.3895	0.151	0.151	1.62335e-12
HEMK1	9.08003e-17	0.685331	0.088	0.077	1.64049e-12
PLEKHB2	9.08508e-17	0.19197	0.21	0.229	1.6414e-12
SHARPIN	9.0909e-17	0.264162	0.087	0.105	1.64245e-12
TRAF7	9.11568e-17	0.210247	0.106	0.132	1.64693e-12
GABRA3	9.15423e-17	-1.00612	0.03	0.084	1.65389e-12
DAD1	9.22532e-17	0.392833	0.185	0.175	1.66674e-12
TOX2	9.25379e-17	-0.884517	0.029	0.077	1.67188e-12
ANKRD28	9.2927e-17	-0.123125	0.101	0.148	1.67891e-12
TMEM179	9.40761e-17	-0.615576	0.052	0.111	1.69967e-12
MAN1B1	9.73958e-17	0.408073	0.148	0.151	1.75965e-12
ABR	9.89786e-17	-0.343392	0.142	0.217	1.78825e-12
EIF4EBP1	9.98227e-17	0.291621	0.176	0.191	1.8035e-12
ZFP90	1.00097e-16	-0.44565	0.077	0.137	1.80846e-12
WDR11	1.01016e-16	0.172817	0.096	0.123	1.82506e-12
USP33	1.02822e-16	-0.10719	0.138	0.202	1.85769e-12
NSA2	1.0488e-16	0.300874	0.167	0.183	1.89487e-12
SNRPF	1.05599e-16	0.192564	0.133	0.161	1.90785e-12
CCDC6	1.06832e-16	0.203948	0.178	0.199	1.93014e-12
CRABP2	1.07358e-16	-0.122922	0.203	0.272	1.93964e-12
DCXR	1.07442e-16	0.222629	0.118	0.142	1.94115e-12
KMT2E	1.078e-16	-0.109017	0.179	0.245	1.94763e-12
METRN	1.08111e-16	-0.440734	0.1	0.167	1.95325e-12
FAM171A1	1.0821e-16	-0.192008	0.053	0.09	1.95503e-12
MMP24	1.09003e-16	-0.33989	0.12	0.197	1.96936e-12
GNG3	1.09882e-16	0.350706	0.188	0.19	1.98524e-12
CEP78	1.11355e-16	-0.341199	0.058	0.101	2.01184e-12
PRKAR1B	1.13011e-16	-0.479664	0.075	0.143	2.04178e-12
MED24	1.14247e-16	-0.189906	0.126	0.189	2.06409e-12
C6orf62	1.16041e-16	0.176447	0.157	0.184	2.09652e-12
MPRIP	1.18843e-16	0.106505	0.188	0.226	2.14714e-12
SDC2	1.20554e-16	-0.979116	0.025	0.073	2.17804e-12
SERP1	1.21843e-16	0.390953	0.233	0.217	2.20133e-12
ATXN10	1.21909e-16	-0.131276	0.177	0.245	2.20252e-12
C19orf25	1.22368e-16	0.534432	0.125	0.115	2.21083e-12
RABGAP1	1.24868e-16	0.198877	0.154	0.185	2.25598e-12
PREX1	1.25753e-16	-1.3039	0.018	0.061	2.27198e-12
FTSJ1	1.26571e-16	0.37198	0.111	0.118	2.28676e-12
PTGES2	1.2731e-16	0.18279	0.198	0.22	2.30011e-12
PSMD7	1.32493e-16	0.237376	0.136	0.155	2.39375e-12
RIMS3	1.33747e-16	-0.158705	0.108	0.162	2.4164e-12
HID1	1.34756e-16	-0.47853	0.063	0.119	2.43463e-12
MVB12B	1.34849e-16	-0.221597	0.115	0.181	2.43631e-12
EDF1	1.36321e-16	0.296384	0.145	0.157	2.46291e-12
RAB11A	1.36645e-16	0.28701	0.116	0.138	2.46877e-12
GAS7	1.36775e-16	-0.27518	0.125	0.194	2.47112e-12
GRB10	1.36957e-16	0.114521	0.122	0.154	2.4744e-12
COX16	1.41301e-16	0.142547	0.203	0.238	2.55288e-12
ZFP62	1.42025e-16	-0.176146	0.1	0.149	2.56596e-12
GLUL	1.42614e-16	-0.105644	0.134	0.191	2.5766e-12
ZNF730	1.42708e-16	-0.885446	0.03	0.076	2.5783e-12
MXD4	1.43439e-16	-0.260937	0.085	0.137	2.59152e-12
SOX5	1.43641e-16	-0.946294	0.042	0.105	2.59515e-12
RPN2	1.44176e-16	0.14908	0.082	0.11	2.60482e-12
ZNF8	1.4729e-16	-0.402014	0.072	0.127	2.6611e-12
UXT	1.47739e-16	0.314203	0.145	0.154	2.66919e-12
DBNL	1.47785e-16	-0.123273	0.155	0.218	2.67003e-12
KCTD3	1.50577e-16	-0.334637	0.092	0.15	2.72048e-12
NCDN	1.50859e-16	-0.244764	0.12	0.179	2.72556e-12
ATF4	1.5223e-16	0.184132	0.29	0.309	2.75033e-12
SAMD5	1.52886e-16	-0.590185	0.046	0.099	2.76219e-12
GTF2A1	1.54127e-16	-0.116894	0.112	0.164	2.78461e-12
MAPK3	1.54146e-16	-0.146446	0.112	0.159	2.78495e-12
ARHGAP35	1.54226e-16	-0.15792	0.245	0.328	2.7864e-12
DONSON	1.55596e-16	0.70736	0.147	0.126	2.81115e-12
CDKN2AIPNL	1.55786e-16	-0.464647	0.069	0.125	2.81458e-12
ASCL1	1.56655e-16	-1.3477	0.02	0.073	2.83029e-12
DCAF11	1.56784e-16	0.299962	0.129	0.152	2.83261e-12
FAM107B	1.57689e-16	-0.319308	0.094	0.154	2.84897e-12
AAAS	1.58849e-16	0.275244	0.204	0.215	2.86993e-12
RNF40	1.59167e-16	0.229142	0.183	0.203	2.87567e-12
CDK12	1.64354e-16	0.206212	0.096	0.116	2.96938e-12
RBM4B	1.68515e-16	-0.140467	0.067	0.108	3.04456e-12
PRDX5	1.69306e-16	0.180319	0.227	0.255	3.05885e-12
CLTC	1.69333e-16	0.21352	0.169	0.186	3.05935e-12
SEMA4B	1.70896e-16	-0.307058	0.049	0.093	3.08758e-12
LRFN3	1.714e-16	0.110965	0.128	0.163	3.09668e-12
SNX4	1.72473e-16	-0.176576	0.069	0.111	3.11607e-12
BRAF	1.73588e-16	-0.232952	0.079	0.132	3.13621e-12
SULF1	1.75012e-16	-2.02194	0.004	0.037	3.16195e-12
SMIM19	1.76691e-16	0.466461	0.101	0.098	3.19228e-12
LRP8	1.78561e-16	-0.268537	0.132	0.204	3.22606e-12
GTPBP1	1.78681e-16	0.138804	0.138	0.173	3.22824e-12
PKNOX2	1.7888e-16	-0.592179	0.054	0.112	3.23182e-12
CDK8	1.79364e-16	-0.337601	0.079	0.132	3.24058e-12
ELAC2	1.80358e-16	0.26618	0.116	0.126	3.25852e-12
TAX1BP3	1.81737e-16	-0.302079	0.058	0.104	3.28344e-12
GIGYF2	1.83415e-16	0.342949	0.119	0.132	3.31376e-12
RAE1	1.83744e-16	0.131831	0.128	0.161	3.3197e-12
SHISA5	1.86856e-16	0.12295	0.204	0.24	3.37592e-12
PRPF39	1.86879e-16	0.298215	0.153	0.168	3.37635e-12
TM9SF2	1.8769e-16	0.195908	0.175	0.197	3.391e-12
ADK	1.88416e-16	0.599115	0.134	0.113	3.40411e-12
HDGF	1.90307e-16	-0.23865	0.05	0.089	3.43828e-12
MFN2	1.92776e-16	0.281735	0.151	0.173	3.48288e-12
ELMOD2	1.9496e-16	0.22874	0.127	0.144	3.52234e-12
GNAI3	1.96334e-16	0.184432	0.251	0.278	3.54717e-12
TUT1	1.97745e-16	0.605713	0.109	0.096	3.57266e-12
GLRX3	2.00375e-16	-0.14657	0.116	0.165	3.62018e-12
SOX21	2.00708e-16	-1.09889	0.017	0.06	3.6262e-12
RBM23	2.0135e-16	-0.193654	0.13	0.191	3.63779e-12
KCNK10	2.03123e-16	-0.335069	0.051	0.095	3.66982e-12
POLE3	2.09702e-16	0.516894	0.103	0.095	3.78868e-12
CCSAP	2.10659e-16	0.400487	0.131	0.148	3.80597e-12
EXOC4	2.1074e-16	-0.210372	0.138	0.203	3.80744e-12
MXI1	2.11306e-16	0.785006	0.153	0.121	3.81767e-12
ACP2	2.23007e-16	-0.150823	0.079	0.122	4.02906e-12
FAM20C	2.26607e-16	0.446778	0.099	0.108	4.09411e-12
SEC24A	2.26953e-16	0.38858	0.231	0.214	4.10035e-12
PRKRA	2.33674e-16	0.160003	0.159	0.192	4.22179e-12
ATP13A1	2.35949e-16	-0.105403	0.124	0.172	4.26289e-12
PRR14	2.3724e-16	0.116321	0.109	0.143	4.28621e-12
IMPAD1	2.38605e-16	0.157358	0.167	0.192	4.31087e-12
KIAA1324L	2.39556e-16	-0.174037	0.108	0.16	4.32805e-12
SIPA1L2	2.41158e-16	1.22212	0.073	0.043	4.35701e-12
CRTAP	2.41356e-16	0.657089	0.087	0.08	4.36058e-12
CABLES2	2.42482e-16	-0.377217	0.065	0.112	4.38093e-12
RAB10	2.45947e-16	-0.15633	0.15	0.214	4.44353e-12
ALG3	2.46801e-16	0.555535	0.161	0.135	4.45895e-12
RABGGTB	2.49177e-16	0.171184	0.18	0.206	4.50189e-12
CIZ1	2.49518e-16	-0.127712	0.114	0.164	4.50805e-12
ZMAT3	2.54531e-16	0.514983	0.122	0.117	4.59861e-12
FBXO11	2.59807e-16	-0.257613	0.145	0.22	4.69394e-12
TMEM200A	2.63496e-16	-0.532698	0.038	0.087	4.76058e-12
SH3BGRL2	2.64875e-16	-0.489731	0.069	0.123	4.7855e-12
TMEM9B	2.69295e-16	0.31954	0.173	0.184	4.86535e-12
CHMP4A	2.6956e-16	0.365302	0.12	0.123	4.87014e-12
VPS37B	2.70994e-16	-0.626373	0.068	0.131	4.89605e-12
TOMM7	2.76711e-16	0.316907	0.198	0.209	4.99934e-12
STK40	2.77929e-16	0.104821	0.13	0.158	5.02135e-12
IGF2BP2	2.79497e-16	-0.180291	0.113	0.169	5.04968e-12
ZNF436	2.8046e-16	0.346225	0.095	0.109	5.06707e-12
MTSS1	2.81106e-16	-0.172236	0.119	0.184	5.07873e-12
POLR2C	2.84336e-16	0.461462	0.137	0.134	5.13709e-12
PHKB	2.84659e-16	0.118938	0.144	0.178	5.14293e-12
GCNT2	2.89492e-16	-0.905693	0.036	0.086	5.23025e-12
RBBP7	2.91538e-16	-0.169815	0.132	0.191	5.26723e-12
ERGIC2	2.91978e-16	0.190232	0.16	0.189	5.27517e-12
FTH1	2.96914e-16	0.114308	0.699	0.756	5.36435e-12
SLC38A10	2.97687e-16	0.277762	0.138	0.147	5.3783e-12
LCORL	2.97718e-16	-0.398099	0.092	0.158	5.37887e-12
VSTM2A	3.0708e-16	-0.736671	0.064	0.134	5.54801e-12
C11orf95	3.08703e-16	-0.439639	0.075	0.14	5.57733e-12
FLII	3.0994e-16	0.286889	0.097	0.117	5.59968e-12
VARS2	3.17466e-16	-0.266061	0.077	0.122	5.73566e-12
GNL1	3.17643e-16	0.368885	0.157	0.162	5.73886e-12
NUP98	3.18262e-16	0.17611	0.103	0.123	5.75003e-12
RNF14	3.18479e-16	0.466822	0.108	0.114	5.75396e-12
TPRKB	3.2418e-16	0.246056	0.14	0.16	5.85697e-12
FAM98B	3.27341e-16	-0.120984	0.122	0.175	5.91406e-12
VDAC2	3.28741e-16	0.276457	0.18	0.2	5.93937e-12
SCAF11	3.30683e-16	0.188851	0.103	0.127	5.97444e-12
TMEM63C	3.31402e-16	0.273737	0.119	0.135	5.98745e-12
ARMC1	3.35562e-16	-0.158444	0.083	0.127	6.06259e-12
RLF	3.47774e-16	0.286971	0.208	0.22	6.28324e-12
TXNDC15	3.53794e-16	0.137808	0.158	0.185	6.39199e-12
UQCRB	3.54673e-16	-0.135846	0.118	0.173	6.40788e-12
SERPINE2	3.60137e-16	-0.662005	0.063	0.128	6.5066e-12
CTDSP2	3.60256e-16	-0.245334	0.065	0.109	6.50875e-12
COMMD7	3.61473e-16	-0.25488	0.079	0.13	6.53073e-12
STRN4	3.69032e-16	-0.249952	0.147	0.223	6.6673e-12
DRAP1	3.70475e-16	0.115953	0.255	0.298	6.69337e-12
OGDH	3.74395e-16	-0.219957	0.086	0.143	6.7642e-12
CCND2	3.7646e-16	0.147955	0.215	0.25	6.8015e-12
CUL5	3.78882e-16	0.193511	0.14	0.173	6.84526e-12
ATP6V1B2	3.88583e-16	-0.105366	0.19	0.252	7.02053e-12
PHF2	3.91143e-16	-0.382887	0.092	0.149	7.06678e-12
ADCY6	4.0373e-16	-0.261589	0.08	0.127	7.29419e-12
AREL1	4.05412e-16	-0.185708	0.083	0.127	7.32458e-12
TADA1	4.07251e-16	0.48684	0.112	0.112	7.3578e-12
TSPYL2	4.09038e-16	0.427508	0.161	0.159	7.3901e-12
CFAP97	4.09863e-16	-0.342162	0.081	0.131	7.40499e-12
MTX2	4.09924e-16	0.296952	0.143	0.159	7.40609e-12
KDM5C	4.10973e-16	0.305482	0.154	0.17	7.42505e-12
SND1	4.13894e-16	0.223922	0.191	0.222	7.47782e-12
CISD2	4.146e-16	-0.354317	0.099	0.16	7.49058e-12
YES1	4.17748e-16	0.126177	0.1	0.126	7.54745e-12
CDH10	4.17975e-16	-0.368026	0.04	0.082	7.55155e-12
ANKRD27	4.26053e-16	0.480703	0.069	0.078	7.69749e-12
APP	4.26796e-16	-0.162481	0.548	0.672	7.71092e-12
LRIG2	4.29077e-16	0.251693	0.13	0.148	7.75213e-12
NAXE	4.29825e-16	-0.259924	0.09	0.143	7.76565e-12
SRSF2	4.39121e-16	-0.230072	0.128	0.191	7.9336e-12
NDUFB11	4.49802e-16	-0.146153	0.161	0.23	8.12657e-12
CCDC9	4.51722e-16	0.664369	0.163	0.126	8.16126e-12
AURKAIP1	4.55989e-16	0.219121	0.12	0.137	8.23835e-12
AHCYL1	4.64187e-16	0.273568	0.183	0.199	8.38646e-12
SMDT1	4.69702e-16	-0.176895	0.156	0.223	8.48611e-12
UBR5	4.71918e-16	-0.183416	0.094	0.143	8.52614e-12
RNF114	4.75069e-16	0.25495	0.107	0.126	8.58307e-12
C1orf216	4.81159e-16	-0.856868	0.03	0.077	8.6931e-12
SURF1	4.83757e-16	0.381036	0.173	0.166	8.74003e-12
SIAH2	4.84144e-16	0.364761	0.108	0.111	8.74702e-12
SELENON	4.84189e-16	-0.249489	0.079	0.127	8.74785e-12
SLC39A10	5.07507e-16	-0.293467	0.062	0.112	9.16913e-12
CECR2	5.07562e-16	-0.826433	0.038	0.087	9.17013e-12
RPN1	5.09681e-16	0.266659	0.135	0.147	9.20841e-12
MMP15	5.22023e-16	-0.323394	0.062	0.113	9.4314e-12
FZD2	5.25393e-16	-0.879012	0.026	0.068	9.49227e-12
PURB	5.28127e-16	0.550848	0.123	0.121	9.54167e-12
BAG5	5.29823e-16	0.425652	0.188	0.182	9.57231e-12
MRFAP1	5.31778e-16	0.103315	0.075	0.1	9.60762e-12
PPP2R3C	5.32421e-16	0.11786	0.085	0.108	9.61925e-12
FAM53B	5.33101e-16	-0.370136	0.061	0.113	9.63154e-12
UGCG	5.37992e-16	0.181289	0.198	0.221	9.71991e-12
TBC1D23	5.44822e-16	0.583564	0.167	0.142	9.84331e-12
TRIM44	5.48433e-16	-0.100511	0.12	0.17	9.90853e-12
THY1	5.52011e-16	-0.385852	0.055	0.105	9.97318e-12
CSMD3	5.5419e-16	-0.808779	0.028	0.075	1.00126e-11
LIG1	5.58553e-16	0.39951	0.118	0.123	1.00914e-11
MYCN	5.6134e-16	-0.352145	0.051	0.094	1.01417e-11
TRUB1	5.63704e-16	0.151666	0.089	0.113	1.01844e-11
MIA3	5.66665e-16	0.136122	0.191	0.22	1.02379e-11
PIAS2	5.69518e-16	-0.146053	0.075	0.121	1.02895e-11
SSU72	5.69641e-16	0.206354	0.127	0.15	1.02917e-11
CDK14	5.73649e-16	-0.422184	0.071	0.124	1.03641e-11
GPM6A	5.74975e-16	0.11734	0.378	0.44	1.03881e-11
TMEM178A	5.77636e-16	-0.351268	0.052	0.093	1.04361e-11
TM9SF1	5.7775e-16	0.391578	0.089	0.094	1.04382e-11
SHC3	6.06099e-16	-0.49455	0.054	0.104	1.09504e-11
DDHD2	6.10057e-16	0.285046	0.162	0.183	1.10219e-11
NECTIN3	6.19742e-16	-0.652153	0.059	0.118	1.11969e-11
YIF1A	6.27956e-16	0.331538	0.255	0.249	1.13453e-11
ZNF69	6.31226e-16	-0.863096	0.032	0.082	1.14044e-11
CDK1	6.37792e-16	-1.92899	0.009	0.05	1.1523e-11
TMEM184B	6.39512e-16	-0.202233	0.077	0.123	1.15541e-11
ERG28	6.42801e-16	-0.223709	0.132	0.198	1.16135e-11
PIP5K1A	6.43176e-16	0.303078	0.095	0.11	1.16203e-11
XPOT	6.43865e-16	0.593334	0.108	0.098	1.16327e-11
ACKR3	6.45237e-16	-1.02798	0.025	0.069	1.16575e-11
C14orf119	6.4697e-16	0.35146	0.108	0.113	1.16888e-11
ASAP2	6.49299e-16	-0.122407	0.097	0.147	1.17309e-11
AHDC1	6.516e-16	-0.297741	0.115	0.178	1.17725e-11
MMD	6.55745e-16	-0.146721	0.132	0.191	1.18473e-11
NDUFA8	6.58026e-16	-0.310185	0.095	0.154	1.18886e-11
RNF31	6.59291e-16	0.288639	0.112	0.125	1.19114e-11
TNPO1	6.61242e-16	-0.310425	0.085	0.139	1.19467e-11
EPS8	6.69362e-16	-1.09851	0.021	0.066	1.20934e-11
NES	6.74177e-16	-0.232288	0.261	0.365	1.21804e-11
TATDN3	6.74308e-16	0.454378	0.12	0.122	1.21827e-11
TMOD3	6.7475e-16	0.352459	0.075	0.089	1.21907e-11
CLCN6	6.86719e-16	0.390332	0.224	0.213	1.24069e-11
EMC7	6.91771e-16	0.186382	0.288	0.31	1.24982e-11
RMDN3	7.018e-16	0.489106	0.165	0.155	1.26794e-11
CNP	7.03521e-16	-0.174661	0.075	0.129	1.27105e-11
TBCK	7.05243e-16	-0.307096	0.092	0.145	1.27416e-11
ZCCHC12	7.05972e-16	-0.287382	0.126	0.194	1.27548e-11
GTF2H4	7.09551e-16	-0.308687	0.085	0.142	1.28195e-11
DUSP16	7.3866e-16	0.164247	0.112	0.147	1.33454e-11
NSUN6	7.49607e-16	0.289802	0.134	0.154	1.35432e-11
UBL3	7.54218e-16	-0.197847	0.11	0.161	1.36264e-11
SLC8A2	7.60682e-16	-0.261313	0.075	0.12	1.37432e-11
SSR3	7.72598e-16	0.360615	0.136	0.14	1.39585e-11
LMBR1L	7.85971e-16	-0.30466	0.105	0.17	1.42001e-11
SIK3	7.86406e-16	-0.495132	0.062	0.12	1.4208e-11
SMNDC1	7.94251e-16	0.505772	0.171	0.158	1.43497e-11
MDH1	8.16194e-16	0.373815	0.166	0.164	1.47462e-11
ADAMTS10	8.19809e-16	-0.555046	0.063	0.119	1.48115e-11
CKAP5	8.25255e-16	-0.130407	0.179	0.245	1.49099e-11
TAB1	8.42162e-16	0.198665	0.095	0.117	1.52153e-11
SLC37A3	8.43255e-16	0.206853	0.13	0.151	1.52351e-11
TAS2R14	8.45183e-16	-0.255363	0.071	0.115	1.52699e-11
STRIP1	8.45394e-16	0.200644	0.109	0.132	1.52737e-11
RABGEF1	8.50495e-16	0.21985	0.119	0.141	1.53659e-11
ERP44	8.54095e-16	0.37946	0.125	0.136	1.54309e-11
BNIP2	8.56379e-16	0.273591	0.138	0.15	1.54722e-11
POMGNT1	8.60161e-16	-0.402681	0.069	0.125	1.55405e-11
PPAN	8.61516e-16	0.689114	0.125	0.109	1.5565e-11
PSMG2	8.66477e-16	0.306414	0.103	0.117	1.56546e-11
EBF4	8.96469e-16	-0.507301	0.046	0.098	1.61965e-11
ZNF516	8.97021e-16	-0.156362	0.086	0.131	1.62065e-11
GGA3	8.98715e-16	0.281718	0.076	0.095	1.62371e-11
LASP1	8.99146e-16	-0.212864	0.132	0.197	1.62449e-11
TMED3	9.03088e-16	0.40916	0.188	0.182	1.63161e-11
ZBTB10	9.18357e-16	0.272053	0.097	0.122	1.6592e-11
TP53BP2	9.19542e-16	-0.309539	0.078	0.13	1.66134e-11
PSEN1	9.26961e-16	0.132492	0.124	0.151	1.67474e-11
MAP9	9.35392e-16	0.440299	0.14	0.135	1.68997e-11
E2F4	9.51442e-16	0.358654	0.145	0.15	1.71897e-11
VEGFA	9.56643e-16	0.160416	0.376	0.392	1.72837e-11
THBS3	9.69165e-16	-0.243159	0.089	0.139	1.75099e-11
CRLS1	9.72921e-16	0.396462	0.149	0.145	1.75778e-11
PSMA7	9.74163e-16	0.138327	0.157	0.189	1.76002e-11
INAFM1	9.7673e-16	0.545101	0.164	0.143	1.76466e-11
LIG3	9.8628e-16	0.223658	0.101	0.114	1.78191e-11
RBM10	9.8649e-16	-0.327592	0.083	0.137	1.78229e-11
CHP1	9.93627e-16	-0.144592	0.063	0.097	1.79519e-11
NUP54	9.94592e-16	0.287853	0.147	0.16	1.79693e-11
CACFD1	9.98738e-16	0.155119	0.083	0.113	1.80442e-11
SLC39A3	1.00473e-15	0.332435	0.14	0.14	1.81524e-11
TOP2A	1.00498e-15	-1.53387	0.021	0.072	1.81569e-11
ZNF639	1.01092e-15	0.129372	0.126	0.157	1.82643e-11
PPP1R12C	1.0135e-15	-0.202274	0.083	0.132	1.83109e-11
LRRC8B	1.01593e-15	0.102266	0.102	0.131	1.83548e-11
STK4	1.02728e-15	0.409299	0.05	0.064	1.85599e-11
MED22	1.02755e-15	-0.406318	0.063	0.113	1.85648e-11
DOCK7	1.02809e-15	-0.173003	0.154	0.225	1.85744e-11
ARHGAP12	1.03008e-15	-0.277516	0.106	0.165	1.86104e-11
CHST11	1.03192e-15	-0.439616	0.063	0.116	1.86437e-11
BCL7A	1.04535e-15	-0.163287	0.082	0.128	1.88863e-11
YIF1B	1.04946e-15	0.21346	0.165	0.188	1.89606e-11
NLGN4X	1.05193e-15	-0.315952	0.071	0.119	1.90052e-11
VPS39	1.06992e-15	0.106464	0.12	0.151	1.93303e-11
OGG1	1.07565e-15	0.18759	0.137	0.172	1.94338e-11
NMD3	1.09325e-15	0.178714	0.123	0.148	1.97517e-11
ZNF322	1.09865e-15	0.277838	0.118	0.131	1.98492e-11
ACBD3	1.13043e-15	0.309689	0.241	0.242	2.04235e-11
UBE2G2	1.13594e-15	0.296546	0.155	0.17	2.0523e-11
DIP2B	1.13824e-15	0.160606	0.115	0.145	2.05645e-11
MICOS10	1.14087e-15	-0.122469	0.132	0.189	2.06122e-11
ACADVL	1.15913e-15	-0.472399	0.071	0.125	2.0942e-11
MSANTD2	1.16979e-15	-0.580988	0.03	0.069	2.11345e-11
ARHGEF2	1.18714e-15	0.17549	0.147	0.174	2.14481e-11
TMEM134	1.19763e-15	0.405709	0.084	0.093	2.16376e-11
KMT2A	1.21425e-15	0.212325	0.232	0.257	2.19379e-11
[truncated: 3,843 more rows]

## Sheet: WT-VS-Het_Migrated_MGEs
	p_val	avg_log2FC	pct.1	pct.2	p_val_adj
NNAT	9.12807e-44	-0.82803	0.705	0.788	1.65008e-39
PEG10	3.25062e-40	-0.547627	0.604	0.61	5.87615e-36
MAP1LC3B	1.76578e-39	1.05765	0.499	0.229	3.192e-35
ACTB	6.92139e-37	-0.481367	0.694	0.692	1.25118e-32
HM13	9.52515e-35	1.16519	0.374	0.153	1.72186e-30
DDX3Y	1.00966e-34	-10.8512	0	0.085	1.82517e-30
MT-ATP6	1.46629e-34	-0.563063	0.833	0.811	2.65061e-30
ALG13	5.47464e-33	1.34854	0.359	0.127	9.89651e-29
EIF1AY	3.38281e-31	-10.5595	0	0.076	6.11511e-27
SOX4	1.01939e-30	-0.653965	0.539	0.59	1.84275e-26
ARF4	1.20134e-30	0.496361	0.514	0.309	2.17166e-26
DLK1	1.50133e-30	-0.990188	0.205	0.246	2.71396e-26
VIM	2.6665e-29	-1.12008	0.383	0.49	4.82024e-25
TMSB4X	4.41142e-29	-0.433425	0.732	0.74	7.97453e-25
MPC1	1.20673e-28	0.829288	0.386	0.193	2.18141e-24
MARCKSL1	1.25611e-28	-0.608897	0.572	0.597	2.27068e-24
NDUFA4	4.80246e-27	0.555467	0.539	0.315	8.6814e-23
CDKN1A	1.54605e-26	0.737464	0.393	0.216	2.7948e-22
VAMP2	2.49167e-26	0.512277	0.502	0.3	4.5042e-22
TUBB2B	5.99369e-26	-0.365892	0.824	0.798	1.08348e-21
CKB	1.05202e-25	-0.286573	0.543	0.498	1.90174e-21
DPYSL3	1.2201e-25	-0.499869	0.445	0.451	2.20558e-21
ZIC1	1.29204e-25	-0.86897	0.202	0.255	2.33562e-21
PSMD10	1.9969e-25	0.863548	0.348	0.157	3.60979e-21
EPRS	2.07872e-25	0.192358	0.352	0.229	3.75771e-21
PRDX5	3.371e-25	0.405587	0.289	0.144	6.09376e-21
DPYSL2	5.88551e-25	-0.275831	0.567	0.528	1.06392e-20
OAZ1	7.101e-25	0.272558	0.674	0.497	1.28365e-20
GPX4	7.97715e-25	0.12092	0.44	0.312	1.44203e-20
RNF5	9.95597e-25	0.294179	0.328	0.194	1.79974e-20
C12orf57	1.6939e-24	0.123535	0.481	0.347	3.06206e-20
SEC31A	1.86078e-24	0.471579	0.542	0.346	3.36374e-20
GAP43	9.90573e-24	-0.376575	0.302	0.259	1.79066e-19
MAP2	1.04978e-23	-0.441815	0.505	0.51	1.89769e-19
H3F3A	2.10563e-23	-0.453141	0.454	0.441	3.80635e-19
EEF1A2	2.9287e-23	0.532638	0.447	0.261	5.2942e-19
UFM1	3.30916e-23	0.537543	0.326	0.184	5.98198e-19
TUBA1A	3.44094e-23	-0.579217	0.476	0.535	6.2202e-19
TSPAN3	5.06002e-23	-0.269807	0.432	0.381	9.147e-19
USP11	5.23851e-23	0.555629	0.5	0.288	9.46965e-19
ANAPC11	5.55927e-23	0.61246	0.392	0.218	1.00495e-18
DSTN	5.83053e-23	0.455382	0.351	0.213	1.05398e-18
COPG1	8.7434e-23	0.281258	0.392	0.26	1.58055e-18
CPE	1.17916e-22	0.123042	0.549	0.404	2.13158e-18
TNKS	1.18691e-22	0.202467	0.337	0.224	2.14558e-18
CFL1	1.45974e-22	-0.109062	0.466	0.375	2.63877e-18
SLC4A7	1.6142e-22	0.121185	0.502	0.369	2.91799e-18
AP1S2	1.6193e-22	1.14072	0.203	0.072	2.9272e-18
GPC2	1.78215e-22	-0.714067	0.252	0.284	3.22159e-18
USP9Y	2.77399e-22	-10.3395	0	0.056	5.01455e-18
SLC3A2	5.32881e-22	0.463329	0.423	0.257	9.63289e-18
MED8	6.87974e-22	1.07553	0.263	0.108	1.24365e-17
TMF1	8.86832e-22	0.735038	0.298	0.144	1.60313e-17
FTL	9.08171e-22	0.12186	0.557	0.416	1.6417e-17
EID1	1.44635e-21	0.217575	0.527	0.381	2.61457e-17
INA	1.45864e-21	-0.565864	0.29	0.293	2.63679e-17
NREP	1.52462e-21	-0.388365	0.536	0.514	2.75606e-17
SEC24C	1.68043e-21	0.542592	0.293	0.158	3.03771e-17
RER1	2.23523e-21	0.79489	0.302	0.144	4.04062e-17
ID4	2.69647e-21	-0.719089	0.25	0.292	4.87442e-17
AP3D1	2.75336e-21	0.50922	0.377	0.221	4.97725e-17
EIF1B	3.44521e-21	0.194891	0.446	0.305	6.22791e-17
NHP2	3.85969e-21	0.330005	0.373	0.246	6.97716e-17
G3BP2	4.56284e-21	0.62473	0.399	0.21	8.24825e-17
CCPG1	5.4553e-21	0.652076	0.255	0.125	9.86155e-17
DPYSL5	5.6221e-21	-0.307919	0.381	0.349	1.01631e-16
PTPRS	6.62209e-21	-0.425848	0.402	0.401	1.19708e-16
PJA2	7.69595e-21	0.3539	0.688	0.513	1.3912e-16
MARCKS	1.14374e-20	-0.364598	0.49	0.471	2.06755e-16
STT3A	1.47572e-20	0.297437	0.327	0.213	2.66766e-16
APP	1.58939e-20	-0.179316	0.535	0.46	2.87313e-16
MYL6	1.83775e-20	-0.326248	0.326	0.277	3.32211e-16
TOMM5	2.00259e-20	0.646482	0.323	0.164	3.62008e-16
TIPRL	2.07766e-20	-0.125358	0.279	0.212	3.75579e-16
MEST	2.14795e-20	-0.258854	0.604	0.552	3.88284e-16
ZCCHC7	2.48421e-20	1.04315	0.211	0.079	4.49071e-16
CADM1	2.64218e-20	-0.50616	0.311	0.311	4.77626e-16
RTN1	3.0893e-20	-0.471596	0.401	0.406	5.58454e-16
YKT6	3.09563e-20	0.555475	0.452	0.28	5.59598e-16
MT-ND3	3.38638e-20	-0.237842	0.407	0.35	6.12156e-16
EMC7	3.91361e-20	0.298117	0.293	0.182	7.07464e-16
PTPRN	9.12624e-20	0.702692	0.266	0.128	1.64975e-15
SYAP1	9.96034e-20	0.907941	0.22	0.092	1.80053e-15
CUTA	1.18443e-19	0.498597	0.358	0.208	2.1411e-15
PRDX2	1.34159e-19	-0.117756	0.504	0.419	2.42519e-15
UTY	2.03123e-19	-9.89164	0	0.048	3.67185e-15
BEX4	2.24105e-19	0.103822	0.41	0.29	4.05114e-15
GOLT1B	2.25329e-19	0.822642	0.275	0.134	4.07328e-15
GET1	2.36923e-19	0.560136	0.388	0.208	4.28285e-15
BSCL2	2.59319e-19	0.221853	0.393	0.272	4.6877e-15
CD24	3.0492e-19	-0.263549	0.497	0.455	5.51204e-15
GPR173	3.0688e-19	0.118632	0.347	0.239	5.54746e-15
SERINC1	3.21557e-19	0.265747	0.635	0.463	5.81278e-15
PDHA1	3.49359e-19	0.240435	0.275	0.165	6.31536e-15
ELAVL3	3.93546e-19	-0.217837	0.411	0.354	7.11413e-15
UVSSA	4.73914e-19	1.00864	0.26	0.108	8.56695e-15
PHPT1	4.77903e-19	0.427682	0.501	0.334	8.63905e-15
SMARCA5	5.61422e-19	0.148003	0.358	0.251	1.01488e-14
GPM6A	7.6055e-19	-0.235333	0.381	0.322	1.37485e-14
NUFIP2	1.19872e-18	0.727743	0.263	0.124	2.16693e-14
ATP1A3	1.32462e-18	0.301973	0.409	0.278	2.39452e-14
ARF1	1.32608e-18	0.454406	0.428	0.276	2.39715e-14
MLLT11	1.37969e-18	-0.249495	0.521	0.478	2.49407e-14
PAM16	1.42452e-18	0.590246	0.228	0.111	2.5751e-14
CELF3	1.78787e-18	-0.320402	0.434	0.4	3.23193e-14
UCHL1	1.81813e-18	-0.213001	0.735	0.676	3.28663e-14
MT-ND5	1.83406e-18	-0.233299	0.386	0.328	3.31543e-14
CTXN1	2.04709e-18	-0.39232	0.289	0.267	3.70053e-14
COPB2	2.04917e-18	0.371168	0.347	0.219	3.70429e-14
DDIT3	2.1106e-18	0.58924	0.299	0.16	3.81534e-14
YWHAZ	2.17587e-18	-0.216473	0.363	0.304	3.93333e-14
CRIPT	2.24219e-18	0.608514	0.295	0.16	4.05321e-14
DCX	2.28049e-18	0.268583	0.758	0.585	4.12245e-14
CLASP2	2.48044e-18	-0.240444	0.397	0.348	4.48389e-14
MT-ND6	3.12093e-18	-0.14766	0.406	0.346	5.6417e-14
GRIK2	3.74489e-18	-1.21817	0.098	0.166	6.76964e-14
FADS1	3.80866e-18	0.381091	0.335	0.206	6.88491e-14
MAP1B	3.93301e-18	-0.139052	0.745	0.668	7.10971e-14
BNIP3L	4.23814e-18	0.251853	0.525	0.383	7.66129e-14
YBX1	4.33256e-18	0.229145	0.543	0.397	7.83196e-14
KDM5D	5.67306e-18	-10.0817	0	0.052	1.02552e-13
CRABP2	5.68506e-18	1.09662	0.207	0.076	1.02769e-13
KDM3A	5.68614e-18	0.408912	0.294	0.176	1.02788e-13
USP9X	6.87633e-18	0.213784	0.189	0.113	1.24303e-13
AUTS2	7.91085e-18	-0.251455	0.342	0.303	1.43004e-13
PRKACA	8.30965e-18	0.5154	0.37	0.216	1.50214e-13
DYNLRB1	8.34024e-18	0.126206	0.321	0.23	1.50766e-13
CMPK1	9.45337e-18	0.132948	0.238	0.157	1.70889e-13
COG3	9.90021e-18	0.362873	0.28	0.163	1.78966e-13
NES	1.08659e-17	-0.553943	0.268	0.268	1.96422e-13
FARSB	1.14162e-17	0.558976	0.274	0.147	2.06371e-13
TMX2	1.20411e-17	0.572619	0.348	0.201	2.17667e-13
SAP18	1.22128e-17	0.432187	0.284	0.163	2.2077e-13
PEG3	1.25084e-17	-0.115658	0.032	0.028	2.26114e-13
ZNF292	1.25958e-17	0.182543	0.299	0.198	2.27693e-13
BASP1	1.30885e-17	-0.28012	0.506	0.472	2.36601e-13
FBXL17	1.33364e-17	0.347621	0.284	0.172	2.41083e-13
ACTG1	1.36727e-17	-0.378931	0.609	0.624	2.47162e-13
STMN2	1.38423e-17	-0.309832	0.563	0.542	2.50227e-13
OCIAD1	1.46292e-17	0.495262	0.473	0.298	2.64451e-13
DGUOK	1.47926e-17	0.485158	0.351	0.212	2.67406e-13
MSTO1	1.50345e-17	0.719589	0.289	0.147	2.71778e-13
TCERG1	1.54195e-17	0.245498	0.313	0.197	2.78738e-13
MIDN	1.54285e-17	-0.402764	0.294	0.281	2.78901e-13
PCSK1N	1.92309e-17	0.166782	0.386	0.265	3.47636e-13
SEC61A1	2.26339e-17	0.27392	0.35	0.245	4.09153e-13
RIOK3	2.75702e-17	0.655815	0.206	0.093	4.98387e-13
CNBP	2.78562e-17	0.343544	0.337	0.213	5.03556e-13
NCAM1	2.8431e-17	-0.21966	0.39	0.347	5.13946e-13
HSP90AA1	3.02019e-17	-0.200033	0.446	0.386	5.45961e-13
DYM	3.10778e-17	0.273536	0.275	0.178	5.61793e-13
NDUFAB1	3.40081e-17	0.196901	0.312	0.208	6.14764e-13
EMD	3.54988e-17	0.392778	0.338	0.203	6.41712e-13
C7orf50	3.69658e-17	0.602017	0.315	0.168	6.68232e-13
TMEM33	4.09996e-17	0.337948	0.305	0.18	7.41149e-13
YIF1A	4.2899e-17	0.714535	0.273	0.136	7.75486e-13
NDUFA5	4.48412e-17	0.40623	0.232	0.121	8.10595e-13
SEPTIN3	4.64256e-17	-0.386571	0.298	0.286	8.39236e-13
APMAP	4.72027e-17	0.488423	0.28	0.164	8.53283e-13
TNFRSF10B	5.05758e-17	0.670434	0.274	0.145	9.14258e-13
MT-CO2	5.16004e-17	0.108343	0.881	0.751	9.3278e-13
GFPT1	5.30067e-17	0.589246	0.312	0.18	9.58203e-13
GORASP2	6.30254e-17	0.706131	0.25	0.126	1.13931e-12
SPIN1	6.75259e-17	-0.205367	0.293	0.246	1.22067e-12
DCAF7	7.30915e-17	0.27571	0.368	0.249	1.32127e-12
SIKE1	7.67722e-17	0.621673	0.245	0.127	1.38781e-12
YWHAQ	7.90579e-17	-0.516057	0.275	0.283	1.42913e-12
COPB1	8.38717e-17	0.376407	0.382	0.246	1.51615e-12
HNRNPA2B1	9.21799e-17	-0.270446	0.374	0.347	1.66634e-12
SERP1	9.31285e-17	0.537449	0.233	0.129	1.68348e-12
CDK16	9.83522e-17	0.491045	0.365	0.203	1.77791e-12
NDUFB9	9.96689e-17	0.526503	0.312	0.177	1.80171e-12
ALKBH5	1.05391e-16	0.391445	0.297	0.181	1.90515e-12
MAGEH1	1.11285e-16	0.441122	0.44	0.287	2.0117e-12
TSPAN13	1.18003e-16	-0.213114	0.257	0.204	2.13315e-12
NUP58	1.18992e-16	0.392615	0.293	0.178	2.15102e-12
DCLK2	1.25767e-16	-0.422046	0.305	0.289	2.27349e-12
ENC1	1.34572e-16	-0.643031	0.296	0.374	2.43266e-12
LRIF1	1.46962e-16	0.828662	0.201	0.093	2.65663e-12
FADS2	1.53798e-16	-0.297821	0.327	0.295	2.78021e-12
SBK1	1.57691e-16	-0.239583	0.432	0.398	2.85059e-12
MIF	1.62785e-16	0.136823	0.387	0.282	2.94266e-12
PREPL	1.66597e-16	0.224701	0.504	0.36	3.01158e-12
CALU	1.68916e-16	0.566976	0.28	0.15	3.0535e-12
PCMT1	1.76384e-16	0.768077	0.28	0.139	3.1885e-12
RTN3	1.77661e-16	0.109822	0.739	0.614	3.21157e-12
DNAJC10	1.81773e-16	0.211723	0.207	0.126	3.2859e-12
ATXN7L3B	1.90555e-16	0.329443	0.364	0.234	3.44467e-12
TMEM9	1.9463e-16	0.179221	0.291	0.19	3.51832e-12
MGST3	1.98898e-16	0.699443	0.286	0.148	3.59548e-12
DYNLL2	2.12394e-16	-0.165496	0.545	0.489	3.83945e-12
PPP2R5B	2.45196e-16	0.438627	0.3	0.168	4.43242e-12
HSPA8	2.54869e-16	-0.161066	0.431	0.374	4.60726e-12
TMSB15A	2.70955e-16	-0.432495	0.255	0.251	4.89806e-12
RNMT	2.76154e-16	0.437255	0.276	0.164	4.99204e-12
PCLO	3.24148e-16	0.558666	0.242	0.127	5.85963e-12
CHPF	3.66531e-16	0.641045	0.267	0.146	6.62578e-12
RNF7	3.75505e-16	0.167572	0.365	0.257	6.78801e-12
GOSR2	4.03317e-16	0.291937	0.319	0.207	7.29077e-12
AP2A1	4.24537e-16	0.458428	0.265	0.151	7.67435e-12
TRAP1	4.52884e-16	0.624019	0.291	0.157	8.18678e-12
LSM4	4.68213e-16	0.630478	0.264	0.144	8.46389e-12
ARCN1	4.88115e-16	0.527813	0.27	0.147	8.82365e-12
TERF2IP	4.94619e-16	0.274981	0.501	0.358	8.94122e-12
SOGA3	5.12298e-16	-0.162073	0.327	0.279	9.26081e-12
ATP5F1B	5.2277e-16	0.296855	0.439	0.292	9.45011e-12
GUK1	5.64753e-16	0.48679	0.273	0.161	1.0209e-11
RAB6A	5.86532e-16	0.219624	0.367	0.246	1.06027e-11
TOMM20	6.0153e-16	0.23033	0.407	0.28	1.08739e-11
PPP3R1	6.20513e-16	0.126439	0.308	0.219	1.1217e-11
TMEM205	6.4684e-16	0.981762	0.209	0.085	1.16929e-11
TRMT112	6.5799e-16	0.552472	0.244	0.138	1.18945e-11
CLPTM1	6.79474e-16	0.436334	0.275	0.161	1.22829e-11
GABARAPL2	7.19003e-16	0.349111	0.186	0.106	1.29974e-11
OSBPL2	7.23212e-16	0.627485	0.233	0.125	1.30735e-11
PAFAH1B1	8.06887e-16	-0.103757	0.368	0.308	1.45861e-11
MXRA7	8.23331e-16	0.202815	0.283	0.185	1.48834e-11
RNH1	8.86074e-16	0.582706	0.24	0.12	1.60176e-11
RNF187	9.41724e-16	0.16569	0.415	0.304	1.70235e-11
ACTR10	9.60734e-16	0.30257	0.29	0.184	1.73672e-11
NAPA	1.04535e-15	0.5162	0.283	0.169	1.88968e-11
DAPK3	1.10693e-15	0.753179	0.188	0.088	2.001e-11
CHD2	1.12351e-15	0.140455	0.384	0.276	2.03098e-11
SDC3	1.20457e-15	-0.562518	0.243	0.257	2.1775e-11
MT-CO3	1.21173e-15	-0.22119	0.909	0.848	2.19045e-11
ALMS1	1.40136e-15	0.233396	0.21	0.127	2.53324e-11
ANKRD17	1.4067e-15	0.146582	0.299	0.194	2.54289e-11
CUL4B	1.47587e-15	-0.284149	0.178	0.138	2.66793e-11
GRINA	1.58117e-15	0.360408	0.323	0.2	2.85828e-11
CD63	1.7232e-15	0.431204	0.268	0.157	3.11503e-11
OAZ2	1.72804e-15	-0.103395	0.306	0.241	3.12379e-11
TRAPPC4	1.73591e-15	0.528082	0.27	0.147	3.13801e-11
FOXG1	1.81492e-15	-0.837368	0.234	0.32	3.28082e-11
PSMB2	1.85867e-15	0.344343	0.27	0.165	3.35992e-11
AHCYL1	1.87464e-15	0.432432	0.202	0.109	3.38878e-11
COX7A2L	1.89916e-15	0.434098	0.418	0.261	3.43311e-11
NDUFA1	1.9185e-15	0.623496	0.227	0.111	3.46808e-11
EIF1	2.09253e-15	0.349516	0.473	0.316	3.78266e-11
FTH1	2.14746e-15	0.248399	0.701	0.553	3.88196e-11
ARMCX1	2.1696e-15	0.325517	0.237	0.141	3.92198e-11
IMPDH2	2.33917e-15	0.37999	0.255	0.15	4.22852e-11
COX6A1	2.41488e-15	0.667422	0.285	0.152	4.36539e-11
GAS7	2.65425e-15	0.523244	0.163	0.075	4.79809e-11
SNU13	2.77882e-15	0.33841	0.439	0.297	5.02327e-11
USP14	2.84214e-15	0.565986	0.264	0.15	5.13773e-11
WDR33	2.91023e-15	0.186762	0.257	0.175	5.26081e-11
SRM	2.92317e-15	0.37729	0.239	0.138	5.28421e-11
ATP1B1	3.01581e-15	0.307912	0.202	0.122	5.45169e-11
NDUFA2	3.06354e-15	0.220803	0.242	0.159	5.53796e-11
ENO2	3.31622e-15	0.31327	0.71	0.548	5.99473e-11
CHMP2A	3.37618e-15	0.455923	0.27	0.153	6.10312e-11
POLR3D	3.40475e-15	0.363247	0.181	0.097	6.15476e-11
TTC3	3.48824e-15	0.105662	0.701	0.568	6.30569e-11
DCTN2	3.59199e-15	-0.20566	0.262	0.209	6.49324e-11
NDUFC2	3.60085e-15	0.246743	0.274	0.189	6.50926e-11
PTOV1	4.27883e-15	-0.305461	0.348	0.325	7.73483e-11
SOBP	4.66888e-15	0.398611	0.289	0.177	8.43994e-11
DDX1	4.82493e-15	0.326246	0.246	0.148	8.72203e-11
ARHGAP35	5.07093e-15	-0.468917	0.23	0.233	9.16672e-11
VEGFA	5.20354e-15	-0.256871	0.287	0.253	9.40643e-11
GPATCH2L	5.36199e-15	0.362668	0.253	0.146	9.69288e-11
CNPY2	5.52291e-15	0.266307	0.216	0.131	9.98377e-11
UBB	5.6118e-15	-0.102085	0.328	0.261	1.01444e-10
PRNP	5.63727e-15	0.717263	0.243	0.125	1.01905e-10
SCARB2	6.50853e-15	0.427337	0.315	0.188	1.17655e-10
EIF4B	6.67528e-15	0.325758	0.17	0.089	1.20669e-10
CAMSAP2	6.71335e-15	-0.12884	0.309	0.251	1.21357e-10
ZNRD2	6.78364e-15	0.894952	0.186	0.083	1.22628e-10
RUFY3	6.83424e-15	-0.228976	0.274	0.234	1.23542e-10
DDB1	7.42761e-15	0.317209	0.346	0.233	1.34269e-10
CIB1	7.45794e-15	1.0729	0.194	0.076	1.34817e-10
SURF1	8.24745e-15	0.59402	0.196	0.089	1.49089e-10
GDAP2	8.36716e-15	0.784456	0.169	0.073	1.51253e-10
PER1	8.55457e-15	0.923775	0.191	0.081	1.54641e-10
SEPTIN5	8.56778e-15	-0.475529	0.263	0.276	1.5488e-10
BRI3	8.66152e-15	0.179943	0.36	0.259	1.56574e-10
COX14	8.66301e-15	0.471653	0.218	0.117	1.56601e-10
CLTB	8.9243e-15	0.540856	0.199	0.101	1.61325e-10
PSMB1	8.93292e-15	0.136954	0.337	0.234	1.6148e-10
VPS45	9.3063e-15	-0.243697	0.187	0.159	1.6823e-10
TBCB	9.36507e-15	0.190325	0.376	0.28	1.69292e-10
FXYD6	9.37839e-15	-0.117399	0.559	0.482	1.69533e-10
BEX3	9.85071e-15	-0.286613	0.403	0.371	1.78071e-10
CDK5RAP3	9.89339e-15	0.134342	0.305	0.215	1.78843e-10
TMEM208	1.0013e-14	0.664128	0.254	0.128	1.81005e-10
GDI1	1.02678e-14	-0.329924	0.43	0.419	1.85611e-10
TAF7	1.05456e-14	0.353778	0.337	0.213	1.90632e-10
RLF	1.11854e-14	0.588802	0.209	0.1	2.02199e-10
RAB2A	1.14828e-14	0.313067	0.34	0.217	2.07575e-10
DONSON	1.19835e-14	0.607427	0.157	0.076	2.16626e-10
EEF1G	1.20453e-14	0.199921	0.53	0.387	2.17744e-10
SGTA	1.23438e-14	0.505911	0.271	0.146	2.23138e-10
C16orf58	1.35321e-14	0.373023	0.242	0.143	2.4462e-10
MLF2	1.37995e-14	0.184986	0.314	0.223	2.49453e-10
GABRG1	1.39769e-14	-2.77865	0.012	0.055	2.5266e-10
MAGED1	1.47358e-14	-0.104853	0.578	0.51	2.66379e-10
BTBD2	1.48377e-14	0.191542	0.273	0.187	2.68221e-10
ACBD3	1.56194e-14	0.471828	0.255	0.146	2.82352e-10
LHX8	1.58311e-14	-0.977511	0.161	0.237	2.86179e-10
NUCB2	1.58346e-14	0.5365	0.224	0.119	2.86243e-10
CREB3	1.68355e-14	0.494913	0.294	0.171	3.04336e-10
NECTIN1	1.71922e-14	0.133179	0.222	0.141	3.10783e-10
ATCAY	1.73889e-14	0.209458	0.302	0.195	3.14339e-10
MYBBP1A	1.81346e-14	0.855714	0.188	0.081	3.2782e-10
SLC35E1	1.92202e-14	0.275163	0.187	0.113	3.47443e-10
RERE	1.99908e-14	0.336339	0.386	0.257	3.61375e-10
2024-03-06	2.01187e-14	-0.225266	0.34	0.281	3.63686e-10
RNF167	2.12627e-14	0.459788	0.235	0.135	3.84366e-10
HSP90AB1	2.13191e-14	0.208324	0.469	0.35	3.85385e-10
ATAT1	2.14838e-14	-0.142878	0.313	0.261	3.88363e-10
EIF3B	2.41709e-14	0.319904	0.22	0.131	4.36938e-10
SEC23B	2.41912e-14	0.42167	0.184	0.103	4.37304e-10
WBP1	2.5518e-14	0.218926	0.285	0.195	4.61289e-10
MDH1	2.60873e-14	0.427014	0.175	0.095	4.7158e-10
SEC61B	2.60887e-14	0.525755	0.219	0.119	4.71606e-10
PLPPR3	2.67764e-14	-0.575298	0.216	0.21	4.84037e-10
LUC7L3	2.68747e-14	-0.223113	0.375	0.34	4.85813e-10
MAPK1IP1L	2.74137e-14	0.30733	0.225	0.131	4.95558e-10
ARRDC3	2.78435e-14	-0.180925	0.368	0.305	5.03327e-10
NDUFB7	2.79852e-14	0.141095	0.23	0.151	5.05888e-10
MYEF2	2.95718e-14	-0.103563	0.394	0.329	5.3457e-10
ZDHHC17	2.98391e-14	0.215277	0.206	0.127	5.39401e-10
NDUFV2	3.0995e-14	0.316985	0.287	0.182	5.60297e-10
C4orf3	3.10261e-14	0.217417	0.156	0.103	5.60859e-10
APBB1	3.14995e-14	-0.22055	0.192	0.151	5.69416e-10
ARPP19	3.1824e-14	0.168666	0.353	0.259	5.75282e-10
DNAJA2	3.26215e-14	0.407067	0.299	0.184	5.89699e-10
NUDT21	3.28774e-14	0.16169	0.292	0.207	5.94326e-10
INAFM1	3.31868e-14	0.551314	0.177	0.089	5.99918e-10
BUD31	3.32125e-14	0.470264	0.3	0.176	6.00382e-10
HMGB2	3.36756e-14	0.796885	0.22	0.1	6.08753e-10
CCNL2	3.47176e-14	-0.147242	0.442	0.382	6.2759e-10
DDX42	3.52178e-14	0.424941	0.251	0.145	6.36632e-10
ERCC1	3.52701e-14	0.304165	0.202	0.118	6.37577e-10
LMO3	3.83856e-14	-0.817997	0.171	0.226	6.93897e-10
CAMLG	3.93341e-14	0.425107	0.228	0.135	7.11043e-10
TMEM183A	3.99598e-14	0.607632	0.274	0.148	7.22353e-10
AKIRIN2	4.0028e-14	0.135212	0.259	0.186	7.23586e-10
CCDC9	4.03921e-14	0.604311	0.17	0.085	7.30169e-10
SEC23A	4.06735e-14	0.355483	0.27	0.172	7.35255e-10
SCG3	4.21039e-14	0.220175	0.287	0.198	7.61113e-10
EBNA1BP2	4.28578e-14	0.896302	0.211	0.094	7.74741e-10
TMSB10	4.31854e-14	-0.115788	0.813	0.77	7.80663e-10
AASDHPPT	4.34424e-14	-0.11196	0.286	0.215	7.85309e-10
ROMO1	4.37629e-14	0.548334	0.33	0.195	7.91102e-10
MT-ND4L	4.48425e-14	-0.159311	0.86	0.785	8.10618e-10
N4BP2L2	4.56014e-14	0.151631	0.268	0.174	8.24336e-10
CSNK1E	4.90354e-14	-0.281445	0.27	0.248	8.86412e-10
ZSWIM8	4.99335e-14	0.320892	0.239	0.152	9.02647e-10
XPR1	4.99579e-14	-0.357856	0.274	0.251	9.03088e-10
RABAC1	5.21289e-14	0.304408	0.337	0.236	9.42334e-10
YIPF2	5.56926e-14	0.653365	0.162	0.076	1.00676e-09
GPR107	5.6097e-14	0.415088	0.322	0.21	1.01407e-09
PRPF6	5.61419e-14	0.330143	0.293	0.186	1.01488e-09
SLC38A1	5.75863e-14	0.111308	0.337	0.246	1.04099e-09
ISLR2	5.94346e-14	-0.146379	0.317	0.264	1.0744e-09
DLG4	6.09545e-14	-0.102953	0.339	0.286	1.10187e-09
TRAPPC3	6.42325e-14	0.317389	0.213	0.132	1.16113e-09
ZCRB1	6.43506e-14	0.447083	0.203	0.11	1.16327e-09
TMEM263	6.49251e-14	0.413453	0.263	0.161	1.17365e-09
TMEFF1	6.53768e-14	-0.116951	0.345	0.292	1.18182e-09
TMEM59L	6.54782e-14	0.200403	0.376	0.272	1.18365e-09
COPA	6.75987e-14	0.309259	0.417	0.291	1.22198e-09
PSAP	6.84454e-14	-0.150919	0.294	0.242	1.23729e-09
PFDN5	6.93552e-14	0.188532	0.235	0.156	1.25373e-09
AGAP1	7.0568e-14	0.198856	0.283	0.187	1.27566e-09
ROBO1	7.17745e-14	-0.500855	0.187	0.184	1.29747e-09
CAND1	7.42567e-14	0.112327	0.383	0.297	1.34234e-09
NFE2L1	7.4353e-14	0.585411	0.302	0.178	1.34408e-09
RAD23A	7.68071e-14	0.634292	0.18	0.089	1.38844e-09
PRKAR2B	7.88828e-14	-0.23446	0.232	0.188	1.42596e-09
RBFOX2	7.91039e-14	-0.214428	0.336	0.293	1.42996e-09
WDR82	8.12594e-14	-0.112336	0.345	0.297	1.46893e-09
GNL3	8.20219e-14	0.726036	0.295	0.151	1.48271e-09
RAB5C	8.20524e-14	0.41569	0.255	0.151	1.48326e-09
ISCU	8.52143e-14	0.474815	0.187	0.098	1.54042e-09
UQCR10	8.8344e-14	0.243398	0.283	0.19	1.59699e-09
NARS	9.00549e-14	0.128358	0.286	0.214	1.62792e-09
NDUFA10	9.43288e-14	0.217193	0.205	0.131	1.70518e-09
WDR47	9.69364e-14	-0.178048	0.165	0.14	1.75232e-09
SYT13	9.70361e-14	0.372248	0.277	0.153	1.75412e-09
DTX3	9.7552e-14	-0.323098	0.17	0.142	1.76345e-09
TUBB2A	9.89477e-14	-0.311462	0.394	0.378	1.78868e-09
CELF1	9.96536e-14	0.342149	0.278	0.171	1.80144e-09
BBC3	1.00766e-13	0.45385	0.18	0.1	1.82154e-09
EMC4	1.07565e-13	0.252679	0.29	0.193	1.94446e-09
CLU	1.08597e-13	0.471468	0.28	0.164	1.96311e-09
DPH7	1.21967e-13	0.78544	0.204	0.102	2.2048e-09
ZCCHC17	1.23331e-13	0.633879	0.243	0.131	2.22945e-09
MAT2A	1.264e-13	-0.303596	0.278	0.257	2.28493e-09
CLSTN1	1.39444e-13	-0.113609	0.287	0.229	2.52073e-09
ANKRD46	1.39917e-13	0.371091	0.228	0.135	2.52929e-09
METTL26	1.45762e-13	0.724967	0.209	0.096	2.63494e-09
NDUFV3	1.46535e-13	0.396142	0.208	0.131	2.64892e-09
DDR1	1.50756e-13	-0.196775	0.311	0.276	2.72521e-09
CCDC47	1.66741e-13	0.551812	0.223	0.12	3.01418e-09
SPAG9	1.67744e-13	-0.27171	0.333	0.298	3.03231e-09
TMEM68	1.71095e-13	0.145639	0.227	0.151	3.09289e-09
VHL	1.77527e-13	-0.281474	0.203	0.179	3.20916e-09
HIST1H1B	1.81117e-13	-2.40883	0.034	0.087	3.27405e-09
ETFB	1.83008e-13	-0.218248	0.271	0.242	3.30823e-09
SELENOH	1.84447e-13	0.163008	0.397	0.301	3.33424e-09
HES5	1.85383e-13	-1.8887	0.08	0.189	3.35118e-09
ACHE	1.95074e-13	0.481422	0.194	0.1	3.52636e-09
C1orf122	1.95969e-13	0.307259	0.223	0.135	3.54253e-09
SLC44A2	2.05759e-13	0.162533	0.265	0.178	3.71951e-09
PGAM1	2.06394e-13	0.225412	0.165	0.091	3.73099e-09
NAGK	2.13104e-13	0.273198	0.232	0.149	3.85228e-09
DNAJB9	2.2341e-13	0.521854	0.188	0.099	4.03858e-09
HSPA9	2.23563e-13	0.4655	0.223	0.129	4.04135e-09
SNX14	2.23671e-13	0.188682	0.233	0.155	4.0433e-09
ZNF532	2.28118e-13	-0.112667	0.294	0.241	4.12369e-09
HNRNPL	2.2995e-13	-0.402837	0.181	0.168	4.15681e-09
FAM32A	2.30918e-13	0.163736	0.217	0.141	4.17431e-09
CHTOP	2.49926e-13	0.216594	0.243	0.158	4.51791e-09
NDRG4	2.50471e-13	-0.230602	0.281	0.249	4.52777e-09
RNF10	2.663e-13	0.477298	0.246	0.135	4.81391e-09
DCTN3	2.70476e-13	0.165886	0.32	0.223	4.88939e-09
ANAPC13	2.80823e-13	0.729124	0.196	0.097	5.07644e-09
RAB3A	2.84498e-13	0.244213	0.261	0.175	5.14287e-09
GRIK5	2.87215e-13	-0.186133	0.189	0.145	5.19199e-09
DCTN1	2.97487e-13	-0.183665	0.323	0.274	5.37768e-09
DNAJC3	3.09126e-13	0.657481	0.174	0.081	5.58807e-09
KIF5B	3.099e-13	-0.407317	0.25	0.239	5.60206e-09
P4HA1	3.13056e-13	0.308611	0.192	0.113	5.65912e-09
DAD1	3.18706e-13	0.779888	0.212	0.101	5.76125e-09
P4HB	3.22841e-13	0.562054	0.237	0.128	5.83601e-09
CLGN	3.31377e-13	0.640569	0.115	0.049	5.99031e-09
CFAP20	3.49397e-13	0.514473	0.231	0.127	6.31605e-09
DRAP1	3.64871e-13	0.190112	0.269	0.18	6.59578e-09
ZMIZ1	3.67923e-13	0.20362	0.377	0.263	6.65095e-09
COQ4	3.74544e-13	0.498655	0.215	0.116	6.77063e-09
CAPN7	3.75154e-13	0.952704	0.182	0.084	6.78166e-09
HIPK3	3.79818e-13	0.180959	0.271	0.181	6.86597e-09
YIF1B	3.93331e-13	0.399808	0.192	0.109	7.11024e-09
NUDT3	3.98027e-13	-0.292254	0.314	0.283	7.19513e-09
RAB5IF	4.10154e-13	0.379503	0.126	0.063	7.41435e-09
CHCHD2	4.1765e-13	-1.4839	0.067	0.127	7.54987e-09
EIF4A2	4.38637e-13	0.219849	0.213	0.133	7.92924e-09
DLX2	4.50529e-13	-0.382579	0.152	0.142	8.14422e-09
GABARAP	4.55473e-13	0.365927	0.291	0.188	8.23358e-09
CDK13	4.58874e-13	0.128004	0.184	0.117	8.29507e-09
NOVA1	4.59302e-13	-0.636617	0.187	0.209	8.3028e-09
LAPTM4B	4.79104e-13	0.242042	0.298	0.205	8.66077e-09
TAF13	4.79949e-13	0.715155	0.236	0.121	8.67604e-09
SOX2	4.96685e-13	-1.43895	0.104	0.218	8.97858e-09
ARFGAP3	5.01588e-13	0.626716	0.223	0.127	9.06722e-09
DDX24	5.46519e-13	0.279455	0.305	0.199	9.87942e-09
KIFC2	5.54364e-13	-0.631785	0.111	0.116	1.00212e-08
CIAO1	5.55237e-13	0.407458	0.222	0.127	1.0037e-08
NPRL2	5.59755e-13	0.614057	0.197	0.095	1.01187e-08
XBP1	5.65731e-13	0.489702	0.171	0.086	1.02267e-08
ATXN1	5.81039e-13	0.291533	0.166	0.094	1.05034e-08
ANAPC16	5.8733e-13	0.317287	0.225	0.141	1.06172e-08
UBE2D3	5.95679e-13	0.301859	0.271	0.178	1.07681e-08
DIS3	6.00222e-13	0.316158	0.232	0.148	1.08502e-08
GOLGA5	6.2176e-13	0.582559	0.179	0.083	1.12396e-08
EI24	6.89697e-13	0.553481	0.214	0.116	1.24677e-08
SEC24A	7.10924e-13	0.556525	0.225	0.127	1.28514e-08
TMCO1	7.11609e-13	0.143217	0.23	0.164	1.28637e-08
CANX	7.1629e-13	0.623181	0.237	0.127	1.29484e-08
LAMTOR3	7.36661e-13	0.387226	0.224	0.137	1.33166e-08
CHD3	7.49453e-13	-0.357512	0.177	0.157	1.35479e-08
FNBP1L	7.78434e-13	-0.333089	0.257	0.238	1.40718e-08
TMEM8B	7.87389e-13	0.154064	0.255	0.18	1.42336e-08
BSG	7.97985e-13	0.306934	0.192	0.113	1.44252e-08
APBB3	8.12106e-13	0.457988	0.315	0.195	1.46804e-08
PRRC2C	8.3029e-13	0.351472	0.255	0.161	1.50092e-08
PSMC4	8.47777e-13	0.207764	0.265	0.178	1.53253e-08
TCP1	8.51869e-13	0.416799	0.258	0.15	1.53992e-08
IGFBP2	8.51919e-13	0.434106	0.616	0.465	1.54001e-08
ILF3	8.8841e-13	-0.384637	0.279	0.275	1.60598e-08
GNL2	9.06809e-13	0.675323	0.184	0.084	1.63924e-08
SELENOS	9.57179e-13	0.785022	0.233	0.125	1.73029e-08
SF3A3	9.73898e-13	0.455752	0.176	0.094	1.76052e-08
RMND5A	9.81576e-13	0.475337	0.249	0.146	1.77439e-08
KDELR2	9.84411e-13	0.636945	0.255	0.138	1.77952e-08
G6PC3	1.05051e-12	0.99283	0.172	0.068	1.89901e-08
STMN4	1.08504e-12	-0.30513	0.38	0.347	1.96142e-08
DDX6	1.08998e-12	0.102785	0.242	0.172	1.97036e-08
KRT10	1.09436e-12	0.471239	0.142	0.079	1.97828e-08
WDR83OS	1.11726e-12	0.248395	0.35	0.241	2.01967e-08
BACH1	1.14497e-12	-0.139511	0.223	0.17	2.06976e-08
EDF1	1.14939e-12	0.527923	0.181	0.083	2.07775e-08
ELP2	1.18041e-12	0.842668	0.194	0.089	2.13382e-08
FAM171B	1.18171e-12	0.137826	0.216	0.151	2.13618e-08
SNRNP40	1.19522e-12	0.178339	0.161	0.099	2.1606e-08
SMAP1	1.22284e-12	0.189185	0.194	0.125	2.21053e-08
SEPHS2	1.28936e-12	1.01758	0.163	0.065	2.33078e-08
AKAP9	1.29286e-12	0.161623	0.229	0.157	2.3371e-08
TIAL1	1.36586e-12	-0.27263	0.216	0.195	2.46906e-08
EDEM3	1.41843e-12	0.535457	0.214	0.12	2.56409e-08
TUSC3	1.44897e-12	-0.389736	0.242	0.229	2.6193e-08
DNAJA3	1.45529e-12	0.817665	0.165	0.071	2.63072e-08
TOMM40	1.47531e-12	0.472604	0.189	0.11	2.66693e-08
RAB3GAP2	1.52015e-12	0.188963	0.17	0.106	2.74798e-08
AFDN	1.53162e-12	-0.398925	0.219	0.202	2.76872e-08
NDUFB11	1.5382e-12	-0.421238	0.157	0.145	2.78061e-08
NEO1	1.54877e-12	-0.220766	0.164	0.127	2.79972e-08
EPM2AIP1	1.55954e-12	0.220804	0.218	0.144	2.81918e-08
GOSR1	1.56525e-12	0.741657	0.156	0.065	2.8295e-08
ATRNL1	1.59016e-12	-0.239327	0.473	0.433	2.87454e-08
VDAC2	1.59123e-12	0.362531	0.206	0.117	2.87647e-08
DLGAP4	1.65467e-12	-0.35773	0.212	0.19	2.99115e-08
PGRMC1	1.66654e-12	0.109303	0.332	0.246	3.01261e-08
BIRC6	1.82354e-12	0.240574	0.283	0.193	3.29641e-08
LARS	1.85542e-12	0.363919	0.219	0.129	3.35404e-08
CEBPG	1.85798e-12	0.313443	0.199	0.123	3.35867e-08
AGAP2	1.86354e-12	-0.292035	0.189	0.164	3.36872e-08
TFG	1.89167e-12	0.332501	0.156	0.09	3.41957e-08
GABBR1	1.98323e-12	-0.295965	0.243	0.215	3.58508e-08
CCDC88A	2.07458e-12	-0.257759	0.268	0.23	3.75022e-08
GATAD1	2.13902e-12	0.601568	0.215	0.109	3.86671e-08
NUDC	2.15488e-12	0.254926	0.182	0.124	3.89537e-08
PKM	2.16852e-12	0.121079	0.298	0.216	3.92003e-08
PRPF40A	2.29166e-12	-0.132865	0.258	0.21	4.14264e-08
CPEB4	2.3198e-12	0.50166	0.274	0.161	4.19349e-08
CD200	2.41121e-12	-0.383908	0.182	0.173	4.35874e-08
CHGA	2.52106e-12	0.365679	0.199	0.113	4.55731e-08
CEBPZOS	2.57614e-12	0.456251	0.151	0.074	4.65689e-08
MORF4L2	2.58206e-12	0.473794	0.196	0.103	4.66758e-08
DDX18	2.59343e-12	0.521434	0.248	0.138	4.68815e-08
SSR4	2.63432e-12	0.375505	0.229	0.14	4.76205e-08
ELOVL5	2.63667e-12	0.238924	0.211	0.139	4.7663e-08
RBX1	2.67922e-12	0.232199	0.187	0.123	4.84323e-08
KIF21B	2.70673e-12	-0.524968	0.24	0.25	4.89296e-08
PRPF19	2.99873e-12	0.414202	0.254	0.159	5.4208e-08
PDXK	3.0575e-12	0.494547	0.222	0.127	5.52703e-08
OSBP	3.14856e-12	0.487958	0.198	0.115	5.69165e-08
ATG13	3.1879e-12	0.572604	0.18	0.089	5.76276e-08
URI1	3.21167e-12	0.23515	0.225	0.15	5.80574e-08
HSPD1	3.22678e-12	0.581309	0.251	0.14	5.83304e-08
NOC4L	3.22947e-12	0.912333	0.14	0.06	5.83792e-08
RAB5A	3.23015e-12	0.50352	0.195	0.102	5.83914e-08
MORC2	3.27261e-12	0.310518	0.22	0.135	5.91589e-08
MANF	3.46872e-12	0.615538	0.145	0.072	6.2704e-08
CHD9	3.47672e-12	0.25028	0.193	0.116	6.28487e-08
CNTN1	3.51314e-12	0.184939	0.242	0.168	6.3507e-08
B4GALNT4	3.52941e-12	-0.200946	0.234	0.203	6.38012e-08
GON4L	3.59669e-12	0.762831	0.172	0.077	6.50174e-08
PYGB	3.67737e-12	-0.10922	0.222	0.18	6.64758e-08
SON	4.08943e-12	0.338018	0.17	0.1	7.39246e-08
RAC1	4.12881e-12	0.434806	0.228	0.139	7.46365e-08
UQCRH	4.2566e-12	-0.205255	0.198	0.152	7.69466e-08
SEC22A	4.27835e-12	1.07079	0.142	0.059	7.73398e-08
SLC43A2	4.30715e-12	0.546885	0.195	0.1	7.78604e-08
STX12	4.35347e-12	0.101308	0.208	0.144	7.86977e-08
TOP2A	4.36593e-12	-2.49172	0.014	0.06	7.89229e-08
CLDN12	4.46958e-12	0.49253	0.168	0.093	8.07966e-08
DDRGK1	4.77284e-12	0.45555	0.218	0.128	8.62787e-08
WDR26	4.85272e-12	0.164774	0.285	0.208	8.77226e-08
CHKA	5.11626e-12	0.724661	0.16	0.073	9.24866e-08
EIF3J	5.1403e-12	0.510267	0.192	0.103	9.29213e-08
BCL2L13	5.15014e-12	0.472753	0.188	0.111	9.30991e-08
C1orf52	5.21931e-12	0.560204	0.175	0.095	9.43494e-08
MFSD8	5.23379e-12	0.613479	0.139	0.063	9.46112e-08
LRPAP1	5.25615e-12	0.217827	0.191	0.118	9.50154e-08
MAP3K13	5.26567e-12	0.298098	0.177	0.104	9.51875e-08
SERF2	5.34238e-12	0.100887	0.271	0.192	9.65741e-08
TMEM50B	5.46979e-12	0.49148	0.18	0.102	9.88774e-08
CDKN2D	5.52948e-12	0.32304	0.244	0.158	9.99563e-08
H1F0	5.56725e-12	0.678535	0.191	0.089	1.00639e-07
CEP63	5.64063e-12	0.238361	0.144	0.079	1.01966e-07
PRR36	5.89693e-12	-0.258404	0.217	0.194	1.06599e-07
LRPPRC	5.89849e-12	0.167117	0.239	0.169	1.06627e-07
MFSD2A	5.9696e-12	1.08778	0.177	0.075	1.07913e-07
EEF2	6.14467e-12	0.236045	0.664	0.488	1.11077e-07
RNF138	6.49527e-12	0.332561	0.134	0.062	1.17415e-07
VPS53	6.65094e-12	-0.269255	0.186	0.162	1.20229e-07
STK40	6.69341e-12	0.42584	0.153	0.082	1.20997e-07
TPGS2	6.84656e-12	0.406526	0.329	0.203	1.23765e-07
LINGO1	6.91452e-12	-0.113114	0.223	0.183	1.24994e-07
THRAP3	6.99104e-12	0.295181	0.25	0.168	1.26377e-07
SDR39U1	7.14281e-12	0.447193	0.235	0.141	1.29121e-07
CLCN6	7.22597e-12	0.179695	0.216	0.137	1.30624e-07
DHX9	7.36359e-12	-0.31387	0.24	0.226	1.33112e-07
ABI2	7.44827e-12	0.21865	0.333	0.234	1.34642e-07
PRKAR2A	7.59476e-12	0.547421	0.16	0.087	1.37291e-07
COX8A	7.82925e-12	0.393389	0.162	0.088	1.41529e-07
TTBK2	7.89809e-12	0.757705	0.118	0.053	1.42774e-07
TNKS2	7.89832e-12	0.120394	0.244	0.171	1.42778e-07
ENAH	7.9123e-12	-0.177178	0.269	0.234	1.43031e-07
MAP6	8.00805e-12	-0.256989	0.274	0.242	1.44761e-07
CNIH2	8.12242e-12	-0.291804	0.258	0.25	1.46829e-07
ARHGEF1	8.14634e-12	0.503203	0.126	0.062	1.47261e-07
NABP2	8.17159e-12	0.184921	0.184	0.117	1.47718e-07
ZNF664	8.24344e-12	0.260184	0.234	0.156	1.49017e-07
NECAP1	8.51563e-12	0.188252	0.22	0.152	1.53937e-07
FAM168A	8.88838e-12	0.177642	0.306	0.215	1.60675e-07
HDAC2	9.35113e-12	-0.125742	0.21	0.166	1.6904e-07
SYNGR3	9.57479e-12	0.607324	0.189	0.098	1.73083e-07
GPHN	9.99749e-12	0.397756	0.203	0.111	1.80725e-07
DYNLT1	1.00391e-11	-0.313307	0.211	0.19	1.81477e-07
DAAM1	1.01073e-11	0.117709	0.28	0.198	1.8271e-07
SPOCK2	1.03296e-11	0.812151	0.194	0.098	1.86728e-07
ASAH1	1.03947e-11	0.776499	0.128	0.057	1.87905e-07
ABCB8	1.04599e-11	-0.238661	0.129	0.105	1.89083e-07
CNOT9	1.05237e-11	0.345018	0.261	0.17	1.90237e-07
MRS2	1.05252e-11	0.234043	0.165	0.101	1.90264e-07
UQCR11	1.07072e-11	0.251759	0.168	0.101	1.93554e-07
WARS	1.07874e-11	0.224493	0.221	0.149	1.95004e-07
SCN3B	1.08822e-11	0.167631	0.358	0.263	1.96717e-07
PSMF1	1.11939e-11	0.415111	0.233	0.151	2.02351e-07
C18orf32	1.12744e-11	0.493679	0.237	0.133	2.03807e-07
NDUFS1	1.13651e-11	0.14504	0.182	0.119	2.05447e-07
MOAP1	1.13752e-11	0.264439	0.247	0.162	2.0563e-07
CEP57	1.13973e-11	0.185279	0.183	0.115	2.06028e-07
EPS15L1	1.15315e-11	-0.169166	0.15	0.122	2.08455e-07
AGPAT1	1.16406e-11	0.226237	0.251	0.169	2.10427e-07
RBBP7	1.16813e-11	0.759616	0.147	0.065	2.11163e-07
GTF2H5	1.18975e-11	0.494845	0.182	0.096	2.1507e-07
CACNA1B	1.21221e-11	0.458932	0.189	0.101	2.19131e-07
SAMD1	1.21264e-11	0.205518	0.151	0.093	2.19209e-07
TAF10	1.2381e-11	0.189127	0.253	0.174	2.23811e-07
SLAIN2	1.2581e-11	0.114209	0.199	0.137	2.27426e-07
HNRNPA3	1.26572e-11	-0.583268	0.141	0.165	2.28804e-07
SLC25A11	1.26996e-11	0.335953	0.221	0.147	2.29571e-07
SDF4	1.30311e-11	0.353776	0.206	0.122	2.35563e-07
RNF130	1.30728e-11	-0.337322	0.172	0.153	2.36317e-07
MIA3	1.31167e-11	0.226675	0.202	0.132	2.3711e-07
CTDNEP1	1.32197e-11	0.264986	0.155	0.095	2.38973e-07
COPS3	1.34848e-11	0.121974	0.195	0.13	2.43765e-07
CDH2	1.35108e-11	-0.726392	0.206	0.256	2.44235e-07
VARS	1.36859e-11	0.34838	0.208	0.132	2.47401e-07
TPD52L2	1.40004e-11	0.164602	0.228	0.157	2.53085e-07
GNAI3	1.4445e-11	0.272383	0.255	0.165	2.61122e-07
ZFAND1	1.49349e-11	1.28967	0.093	0.028	2.69979e-07
C11orf71	1.53268e-11	0.310283	0.13	0.072	2.77062e-07
PCBP2	1.5905e-11	-0.186115	0.17	0.134	2.87514e-07
REEP5	1.63237e-11	0.37825	0.166	0.101	2.95083e-07
SELENOF	1.64842e-11	0.300192	0.233	0.16	2.97985e-07
SNHG32	1.66334e-11	0.225122	0.15	0.083	3.00683e-07
SRSF9	1.68894e-11	-0.482233	0.161	0.154	3.0531e-07
RNF40	1.72032e-11	0.296802	0.207	0.127	3.10982e-07
NSG1	1.72965e-11	-0.175133	0.324	0.274	3.12668e-07
KMT2C	1.75096e-11	-0.20043	0.255	0.217	3.16521e-07
DDX17	1.76364e-11	-0.232668	0.18	0.151	3.18813e-07
C4orf48	1.8037e-11	-0.357459	0.189	0.184	3.26055e-07
TMED9	1.80979e-11	0.839064	0.189	0.095	3.27156e-07
NAT10	1.87725e-11	0.64946	0.118	0.051	3.39351e-07
PPP1R15B	1.88508e-11	0.235743	0.218	0.15	3.40767e-07
ALG3	1.94967e-11	0.579754	0.158	0.081	3.52442e-07
SPCS1	1.96908e-11	0.247472	0.311	0.227	3.55951e-07
RTF1	1.99799e-11	0.276989	0.225	0.144	3.61176e-07
RACK1	2.09867e-11	-0.340631	0.349	0.334	3.79376e-07
AGO3	2.12726e-11	-0.120716	0.118	0.093	3.84545e-07
EP300	2.2389e-11	0.19678	0.19	0.127	4.04726e-07
DNAJB2	2.31254e-11	0.117954	0.224	0.158	4.18038e-07
MIGA1	2.33793e-11	0.334873	0.165	0.097	4.22628e-07
PTGES2	2.38782e-11	0.423055	0.203	0.115	4.31647e-07
CBX4	2.41766e-11	0.622216	0.224	0.126	4.3704e-07
MAP2K2	2.44384e-11	-0.156447	0.198	0.169	4.41774e-07
LPGAT1	2.47384e-11	-0.308508	0.118	0.1	4.47196e-07
GAD1	2.48046e-11	-0.129914	0.237	0.203	4.48392e-07
APLP2	2.49833e-11	-0.212532	0.208	0.188	4.51623e-07
LCOR	2.57193e-11	0.173007	0.278	0.197	4.64928e-07
CDK20	2.59023e-11	0.280776	0.189	0.114	4.68237e-07
SEC11A	2.69505e-11	-0.307162	0.204	0.187	4.87185e-07
ATAD1	2.85209e-11	0.140815	0.306	0.219	5.15573e-07
PSMD13	2.96646e-11	0.407038	0.296	0.19	5.36247e-07
PGAP1	3.13372e-11	-0.353252	0.161	0.15	5.66483e-07
DNER	3.14888e-11	-0.426041	0.281	0.277	5.69223e-07
TTYH3	3.19402e-11	-0.314433	0.232	0.214	5.77384e-07
ATP6V0A1	3.23856e-11	0.242835	0.33	0.225	5.85434e-07
BUB3	3.25327e-11	0.25213	0.12	0.066	5.88094e-07
PTTG1IP	3.29026e-11	0.174528	0.207	0.144	5.9478e-07
PRKAR1A	3.30485e-11	-0.173015	0.323	0.297	5.97417e-07
ADD1	3.38976e-11	0.120342	0.237	0.173	6.12766e-07
DHX36	3.40215e-11	0.212331	0.332	0.25	6.15007e-07
RPAP3	3.52693e-11	0.449442	0.119	0.059	6.37563e-07
FBXO11	3.61618e-11	-0.30845	0.151	0.138	6.53696e-07
SLC25A4	3.62462e-11	0.354505	0.242	0.15	6.55223e-07
SUGP2	3.67601e-11	-0.182801	0.23	0.197	6.64512e-07
TCEAL2	3.72989e-11	0.370908	0.152	0.078	6.74252e-07
RTN4	3.76356e-11	-0.141255	0.304	0.263	6.80339e-07
DR1	3.83911e-11	-0.244039	0.123	0.097	6.93997e-07
MFF	3.84457e-11	0.160735	0.203	0.142	6.94983e-07
SQSTM1	3.87203e-11	0.15233	0.254	0.194	6.99946e-07
STX1B	3.87457e-11	0.11749	0.158	0.101	7.00407e-07
C9orf72	3.93395e-11	0.406247	0.184	0.108	7.11139e-07
GOLGB1	4.05028e-11	0.348145	0.144	0.077	7.32169e-07
BLCAP	4.0632e-11	-0.109081	0.358	0.311	7.34504e-07
ZNF141	4.23569e-11	0.775672	0.171	0.076	7.65686e-07
SRSF8	4.38678e-11	0.392567	0.15	0.085	7.92999e-07
TMOD2	4.42436e-11	0.377797	0.245	0.159	7.99791e-07
ENOPH1	4.46952e-11	0.105803	0.16	0.112	8.07954e-07
DCAF16	4.62163e-11	0.150443	0.241	0.177	8.35453e-07
TBPL1	4.71264e-11	0.214441	0.14	0.086	8.51904e-07
TBC1D23	4.73036e-11	0.254266	0.152	0.09	8.55107e-07
ATP5MG	4.75747e-11	0.443126	0.241	0.144	8.60009e-07
SCD	4.77315e-11	0.257062	0.405	0.286	8.62843e-07
ZNF428	4.80744e-11	-0.186094	0.273	0.233	8.6904e-07
SMARCA4	4.91103e-11	-0.270743	0.306	0.301	8.87766e-07
H3F3B	4.92705e-11	-0.197387	0.198	0.171	8.90663e-07
DKK3	5.18213e-11	0.173848	0.201	0.134	9.36773e-07
SEPTIN11	5.36502e-11	-0.286791	0.199	0.185	9.69835e-07
POLR2K	5.49091e-11	0.542949	0.194	0.11	9.92592e-07
TPST1	5.49175e-11	0.535737	0.223	0.126	9.92743e-07
BTBD1	5.55107e-11	0.294814	0.193	0.121	1.00347e-06
H1FX	5.56247e-11	-0.181641	0.202	0.178	1.00553e-06
TM9SF3	5.61114e-11	-0.578446	0.234	0.258	1.01433e-06
PIK3R3	5.7206e-11	-0.682107	0.146	0.166	1.03411e-06
SNRNP27	5.89379e-11	0.383656	0.107	0.059	1.06542e-06
ARPC3	5.97298e-11	0.770869	0.093	0.038	1.07974e-06
CADM3	6.11471e-11	-0.313163	0.161	0.145	1.10536e-06
TIMP1	6.21473e-11	0.893882	0.165	0.077	1.12344e-06
ORC3	6.2849e-11	0.289686	0.156	0.093	1.13612e-06
LMF2	6.31309e-11	0.25667	0.155	0.095	1.14122e-06
MLH1	6.35413e-11	0.230726	0.145	0.093	1.14864e-06
ZNF263	6.52492e-11	0.824725	0.147	0.069	1.17951e-06
SLC25A39	6.55648e-11	0.413358	0.165	0.091	1.18521e-06
NRXN1	6.61237e-11	-0.365916	0.181	0.173	1.19532e-06
RNF181	6.77436e-11	0.58204	0.169	0.089	1.2246e-06
QARS	6.79278e-11	-0.200786	0.176	0.146	1.22793e-06
NDUFAF3	6.85336e-11	0.532938	0.244	0.143	1.23888e-06
NDUFA7	7.11318e-11	0.240146	0.168	0.101	1.28585e-06
DDT	7.14931e-11	0.589708	0.16	0.084	1.29238e-06
RNF141	7.17019e-11	0.11302	0.172	0.106	1.29616e-06
ATP6V0D1	7.24328e-11	0.420054	0.219	0.136	1.30937e-06
SLC32A1	7.28608e-11	0.261297	0.177	0.12	1.31711e-06
SNRPC	7.32223e-11	0.468879	0.241	0.142	1.32364e-06
BOD1L1	7.41991e-11	0.126022	0.168	0.111	1.3413e-06
PDCD4	7.4338e-11	0.245296	0.235	0.157	1.34381e-06
SEC14L1	7.67901e-11	0.192822	0.172	0.112	1.38813e-06
POLDIP2	7.71922e-11	0.285717	0.178	0.115	1.3954e-06
EMG1	7.82971e-11	0.820938	0.176	0.088	1.41538e-06
MAP4K5	7.86797e-11	0.329435	0.231	0.141	1.42229e-06
ELP4	7.93541e-11	1.13673	0.119	0.051	1.43448e-06
ZMYM2	8.1193e-11	0.211767	0.323	0.234	1.46773e-06
DIXDC1	8.23114e-11	0.994706	0.146	0.055	1.48794e-06
RPN1	8.46648e-11	0.376678	0.144	0.076	1.53049e-06
LMBRD1	8.56901e-11	0.227207	0.171	0.112	1.54902e-06
CMIP	8.88514e-11	-0.120951	0.257	0.212	1.60617e-06
FASN	9.1798e-11	-0.390936	0.238	0.235	1.65943e-06
ERI3	9.23823e-11	0.247728	0.252	0.179	1.66999e-06
AEN	9.56214e-11	0.98769	0.138	0.059	1.72855e-06
CTTN	9.82427e-11	-0.187882	0.216	0.187	1.77593e-06
TAB2	9.89544e-11	0.487791	0.167	0.093	1.7888e-06
BEX5	9.90266e-11	0.735455	0.168	0.078	1.7901e-06
MARK1	9.95144e-11	-0.211805	0.119	0.095	1.79892e-06
FAM168B	1.01774e-10	0.291596	0.229	0.146	1.83977e-06
CSRNP3	1.02102e-10	-0.404545	0.173	0.169	1.84571e-06
DLD	1.02235e-10	0.374882	0.178	0.104	1.8481e-06
COX7A2	1.03056e-10	-0.227853	0.139	0.116	1.86295e-06
ZNF783	1.04979e-10	0.302176	0.103	0.053	1.8977e-06
PSMC2	1.06011e-10	0.318763	0.161	0.098	1.91637e-06
CTNND1	1.06015e-10	-0.26454	0.245	0.227	1.91643e-06
MTCH1	1.10814e-10	0.323994	0.271	0.183	2.00319e-06
KIAA0895L	1.11387e-10	-0.530442	0.151	0.152	2.01354e-06
CCP110	1.12313e-10	0.140065	0.17	0.116	2.03029e-06
CLPP	1.14353e-10	0.434737	0.218	0.127	2.06716e-06
DMTF1	1.20679e-10	0.319557	0.239	0.154	2.18151e-06
GTF2F1	1.20745e-10	0.243267	0.129	0.076	2.18271e-06
ZER1	1.20817e-10	0.752463	0.177	0.087	2.184e-06
EIF6	1.21502e-10	0.241147	0.152	0.098	2.19639e-06
FAIM2	1.21606e-10	0.391783	0.171	0.095	2.19828e-06
TMEM248	1.22585e-10	0.23562	0.153	0.096	2.21598e-06
VAT1	1.23246e-10	-0.682217	0.166	0.19	2.22792e-06
SETD3	1.24056e-10	0.299485	0.172	0.111	2.24256e-06
MORN4	1.24451e-10	-0.193738	0.14	0.116	2.2497e-06
C8orf33	1.24619e-10	0.222106	0.204	0.136	2.25275e-06
LAPTM4A	1.24775e-10	0.710946	0.164	0.079	2.25555e-06
PARP6	1.25115e-10	0.496107	0.212	0.121	2.26171e-06
PNMA1	1.25435e-10	-0.229589	0.205	0.179	2.26748e-06
ETFA	1.29944e-10	0.158641	0.173	0.117	2.34899e-06
STK19	1.32361e-10	0.651988	0.171	0.092	2.39269e-06
LIN7B	1.34378e-10	0.572376	0.147	0.072	2.42916e-06
YTHDC1	1.34704e-10	0.122782	0.175	0.124	2.43504e-06
NKTR	1.35223e-10	-0.337354	0.151	0.125	2.44443e-06
PNN	1.35858e-10	-0.249727	0.145	0.115	2.4559e-06
MED29	1.3961e-10	0.379971	0.178	0.107	2.52373e-06
RAB14	1.4144e-10	0.102842	0.241	0.178	2.55681e-06
IER2	1.43553e-10	0.50459	0.144	0.076	2.59501e-06
DDX39A	1.45241e-10	0.449254	0.143	0.078	2.62551e-06
TCF25	1.52728e-10	0.145106	0.253	0.187	2.76086e-06
COL6A1	1.55278e-10	0.366103	0.204	0.124	2.80697e-06
ZNF146	1.58155e-10	0.361286	0.234	0.156	2.85896e-06
NDUFB6	1.58774e-10	0.377357	0.199	0.118	2.87016e-06
LRP3	1.59083e-10	0.187804	0.206	0.132	2.87574e-06
MPHOSPH10	1.60425e-10	0.686307	0.121	0.054	2.9e-06
DDX5	1.60515e-10	-0.15481	0.307	0.27	2.90164e-06
SEC63	1.62249e-10	0.270334	0.259	0.176	2.93298e-06
EFNB3	1.63438e-10	-0.339201	0.172	0.16	2.95447e-06
LGMN	1.63975e-10	0.450349	0.126	0.069	2.96418e-06
ITM2C	1.64766e-10	-1.11038	0.122	0.184	2.97847e-06
SYP	1.70242e-10	-0.331772	0.143	0.131	3.07746e-06
PHF20L1	1.70855e-10	0.129148	0.165	0.111	3.08855e-06
HNRNPDL	1.71445e-10	-0.158545	0.259	0.219	3.09921e-06
NT5C3B	1.72076e-10	0.100485	0.134	0.084	3.11062e-06
ZNF337	1.7255e-10	0.365988	0.18	0.106	3.11918e-06
PCBP4	1.72871e-10	-0.216374	0.196	0.157	3.12498e-06
PTPN23	1.73425e-10	0.241336	0.172	0.102	3.13501e-06
CELF5	1.74022e-10	-0.337687	0.188	0.169	3.1458e-06
POU3F3	1.79408e-10	-0.673398	0.134	0.166	3.24315e-06
HK1	1.79712e-10	0.372165	0.175	0.113	3.24866e-06
CPEB2	1.80316e-10	-0.819438	0.074	0.079	3.25957e-06
PFN1	1.80502e-10	0.147153	0.242	0.18	3.26294e-06
SAMM50	1.8244e-10	0.806555	0.13	0.06	3.29797e-06
SPSB3	1.83705e-10	0.33346	0.192	0.123	3.32084e-06
MLEC	1.86501e-10	0.289302	0.202	0.129	3.37138e-06
TTYH1	1.88292e-10	-0.822737	0.163	0.195	3.40375e-06
ZNF22	1.88522e-10	0.343821	0.124	0.068	3.40791e-06
CDC37	1.90808e-10	0.338188	0.273	0.186	3.44924e-06
SELENOW	1.90965e-10	-0.166752	0.328	0.286	3.45207e-06
C6orf62	1.93636e-10	0.107205	0.155	0.11	3.50035e-06
LRRC7	1.95655e-10	-0.664799	0.141	0.17	3.53685e-06
SMS	1.98493e-10	0.180444	0.266	0.194	3.58815e-06
SOGA1	2.02794e-10	-0.243255	0.198	0.158	3.66591e-06
NDUFV1	2.14601e-10	0.223033	0.245	0.164	3.87934e-06
SRSF5	2.16486e-10	0.138687	0.216	0.153	3.91342e-06
TATDN3	2.16529e-10	0.328709	0.127	0.076	3.9142e-06
TMED3	2.17573e-10	0.366995	0.185	0.11	3.93307e-06
DDIT4	2.19274e-10	-0.243539	0.321	0.297	3.96381e-06
YIPF4	2.2408e-10	0.494499	0.268	0.163	4.05069e-06
ZFYVE27	2.26558e-10	0.118579	0.115	0.068	4.0955e-06
PTDSS1	2.26658e-10	0.112123	0.12	0.076	4.0973e-06
SIVA1	2.28323e-10	0.194737	0.204	0.142	4.12739e-06
PTEN	2.29063e-10	0.134305	0.164	0.106	4.14077e-06
NADK2	2.29666e-10	0.24994	0.163	0.111	4.15168e-06
AAAS	2.30028e-10	0.163477	0.201	0.135	4.15822e-06
CKAP5	2.30037e-10	0.168538	0.186	0.132	4.15838e-06
OST4	2.31576e-10	0.325562	0.145	0.076	4.18619e-06
RNF11	2.31802e-10	0.644103	0.3	0.171	4.19028e-06
TMEM87B	2.3408e-10	0.394813	0.109	0.061	4.23147e-06
MDH2	2.4024e-10	0.937568	0.202	0.091	4.34283e-06
BCKDHA	2.41984e-10	0.930234	0.124	0.055	4.37435e-06
METTL23	2.4408e-10	0.535459	0.106	0.05	4.41224e-06
ARID1A	2.4468e-10	-0.334348	0.196	0.189	4.42307e-06
AP3B2	2.5218e-10	0.391768	0.168	0.102	4.55866e-06
DCLK1	2.5491e-10	-0.512389	0.211	0.224	4.60802e-06
ZNF544	2.56928e-10	0.116182	0.181	0.121	4.64449e-06
AVL9	2.5774e-10	0.442061	0.186	0.106	4.65916e-06
BAG5	2.59121e-10	0.481998	0.202	0.115	4.68413e-06
TTC28	2.62089e-10	-0.38442	0.118	0.097	4.73778e-06
DYNC1I2	2.64811e-10	-0.299808	0.287	0.267	4.78698e-06
NDUFB5	2.70834e-10	-0.127678	0.189	0.151	4.89587e-06
DNAJC25	2.72072e-10	0.548891	0.153	0.085	4.91825e-06
CADM4	2.75839e-10	-0.146889	0.275	0.24	4.98634e-06
MPV17	2.7735e-10	0.224371	0.237	0.163	5.01366e-06
RARS	2.78485e-10	0.201938	0.168	0.112	5.03418e-06
SYT5	2.792e-10	-0.174574	0.177	0.145	5.04709e-06
SET	2.83432e-10	0.204377	0.268	0.187	5.1236e-06
MKRN2	2.94175e-10	0.595251	0.153	0.079	5.31781e-06
ARID1B	2.99428e-10	-0.409111	0.148	0.137	5.41277e-06
PPP2R5E	3.20748e-10	-0.622946	0.184	0.198	5.79816e-06
WBP2	3.22142e-10	0.19707	0.156	0.106	5.82337e-06
GNB2	3.31234e-10	-0.367639	0.235	0.229	5.98772e-06
GNG3	3.32597e-10	0.156763	0.176	0.126	6.01236e-06
ZNF160	3.33523e-10	0.40115	0.107	0.055	6.0291e-06
UBXN1	3.34429e-10	0.199917	0.135	0.091	6.04547e-06
OLFM1	3.38832e-10	0.118409	0.235	0.159	6.12507e-06
MSI2	3.40557e-10	-0.429763	0.219	0.214	6.15624e-06
RAB18	3.42078e-10	0.271734	0.234	0.154	6.18374e-06
C11orf24	3.43361e-10	0.702455	0.136	0.061	6.20693e-06
DBN1	3.48342e-10	-0.375605	0.218	0.215	6.29698e-06
ADRM1	3.50481e-10	0.330289	0.191	0.125	6.33565e-06
PHIP	3.56217e-10	-0.247524	0.131	0.11	6.43934e-06
CNIH1	3.61853e-10	0.244933	0.178	0.116	6.54122e-06
EGLN1	3.63646e-10	0.478039	0.188	0.109	6.57363e-06
USP36	3.64694e-10	0.70114	0.156	0.08	6.59257e-06
FSCN1	3.66279e-10	0.385511	0.196	0.12	6.62123e-06
AP1G1	3.72192e-10	0.149559	0.141	0.094	6.72812e-06
ADSL	3.72215e-10	0.280915	0.15	0.093	6.72853e-06
YARS	3.76644e-10	0.719885	0.136	0.065	6.8086e-06
XAB2	3.92667e-10	0.138675	0.157	0.097	7.09824e-06
SLC31A1	3.93137e-10	0.738623	0.13	0.061	7.10673e-06
RO60	3.9509e-10	0.260323	0.322	0.226	7.14204e-06
EHMT1	3.95396e-10	-0.367646	0.171	0.158	7.14757e-06
OBSL1	4.09002e-10	0.199081	0.197	0.139	7.39353e-06
SYNJ1	4.12684e-10	0.379641	0.181	0.113	7.4601e-06
RAD54L2	4.1843e-10	-0.169633	0.104	0.074	7.56395e-06
ARIH1	4.27543e-10	0.206481	0.25	0.179	7.7287e-06
DPM1	4.29663e-10	0.425897	0.159	0.093	7.76702e-06
PCCA	4.31011e-10	0.354598	0.134	0.086	7.79138e-06
KMT5B	4.329e-10	-0.283173	0.156	0.142	7.82554e-06
MAPK6	4.45275e-10	-0.24638	0.189	0.162	8.04923e-06
PRXL2A	4.46441e-10	0.142606	0.217	0.153	8.07031e-06
CKAP4	4.4755e-10	0.390668	0.157	0.083	8.09036e-06
CD46	4.69131e-10	-0.496597	0.133	0.129	8.48049e-06
SEC16A	4.78231e-10	0.372538	0.156	0.091	8.64498e-06
CDC42BPB	4.88609e-10	0.131188	0.21	0.141	8.83258e-06
NRXN2	4.96066e-10	-0.366512	0.201	0.192	8.96738e-06
MPP6	5.05661e-10	0.143597	0.116	0.07	9.14084e-06
PLEKHB2	5.12898e-10	0.234847	0.206	0.145	9.27166e-06
COG1	5.25643e-10	0.774935	0.165	0.082	9.50204e-06
DMWD	5.29048e-10	-0.223662	0.204	0.174	9.5636e-06
DELE1	5.30228e-10	-0.2342	0.122	0.107	9.58494e-06
CPNE1	5.43976e-10	0.128749	0.196	0.133	9.83345e-06
CRABP1	5.44074e-10	-0.418185	0.22	0.158	9.83522e-06
TSC22D1	5.51044e-10	0.202345	0.239	0.17	9.96122e-06
PRKAB1	5.54065e-10	0.481214	0.238	0.141	1.00158e-05
TTBK1	5.57278e-10	0.606742	0.178	0.1	1.00739e-05
COX6C	5.58963e-10	0.352817	0.24	0.161	1.01044e-05
ARHGEF7	5.59711e-10	0.116069	0.216	0.148	1.01179e-05
ZNF462	5.60747e-10	-0.72882	0.131	0.161	1.01366e-05
SECISBP2	5.65924e-10	0.202932	0.16	0.103	1.02302e-05
UBE2G2	5.66012e-10	0.385011	0.162	0.097	1.02318e-05
EIF4EBP2	5.69329e-10	-0.125243	0.281	0.237	1.02918e-05
CLDND1	5.71168e-10	0.178828	0.172	0.114	1.0325e-05
CHPF2	5.72433e-10	0.750059	0.099	0.042	1.03479e-05
WDR6	5.79186e-10	-0.284002	0.192	0.172	1.04699e-05
PFDN2	5.79553e-10	-0.114194	0.204	0.175	1.04766e-05
ZNRF1	5.8239e-10	-0.217256	0.18	0.161	1.05279e-05
ETNK1	5.85249e-10	-0.160742	0.19	0.164	1.05796e-05
PSMD6	5.87737e-10	0.118299	0.171	0.118	1.06245e-05
DYNC2LI1	5.88389e-10	0.777194	0.105	0.041	1.06363e-05
FAM162A	5.88884e-10	0.342181	0.202	0.128	1.06453e-05
VDAC1	5.90269e-10	0.627881	0.17	0.088	1.06703e-05
IARS	5.94303e-10	0.340852	0.182	0.113	1.07432e-05
FIP1L1	6.20473e-10	0.398828	0.213	0.131	1.12163e-05
KIDINS220	6.20695e-10	-0.661333	0.238	0.27	1.12203e-05
TUB	6.28239e-10	0.176955	0.149	0.098	1.13567e-05
CCDC6	6.28682e-10	0.158792	0.17	0.106	1.13647e-05
FAM3C	6.29419e-10	0.213164	0.237	0.155	1.1378e-05
SUCO	6.32863e-10	0.322109	0.192	0.124	1.14403e-05
ATF7IP	6.36276e-10	-0.236588	0.224	0.199	1.1502e-05
ELAVL4	6.36766e-10	-0.117413	0.162	0.123	1.15108e-05
PTPRZ1	6.54451e-10	-1.20904	0.084	0.144	1.18305e-05
SMARCB1	6.68906e-10	-0.185701	0.189	0.158	1.20918e-05
SQLE	6.69499e-10	0.472727	0.199	0.119	1.21025e-05
HIST1H1C	6.94032e-10	-0.555374	0.15	0.159	1.2546e-05
NARF	6.9841e-10	-0.122246	0.17	0.138	1.26252e-05
BICDL1	7.13035e-10	-0.114454	0.14	0.107	1.28895e-05
RSBN1	7.23875e-10	-0.397849	0.135	0.125	1.30855e-05
GPI	7.38685e-10	0.301297	0.167	0.096	1.33532e-05
DNAJB11	7.42938e-10	0.650081	0.195	0.104	1.34301e-05
COG5	7.48025e-10	0.466877	0.148	0.079	1.3522e-05
LCMT1	7.51928e-10	0.454592	0.201	0.119	1.35926e-05
CRLS1	7.61233e-10	0.726844	0.15	0.068	1.37608e-05
DNAJA1	7.75164e-10	0.203466	0.332	0.251	1.40126e-05
PPP1R11	7.87885e-10	0.126796	0.178	0.118	1.42426e-05
SEC23IP	7.88318e-10	0.255138	0.142	0.085	1.42504e-05
PCNX4	7.88573e-10	-0.538899	0.105	0.107	1.4255e-05
ARL1	8.09282e-10	0.298287	0.166	0.109	1.46294e-05
DPP9	8.10485e-10	0.416923	0.096	0.042	1.46511e-05
EIF4G3	8.15487e-10	0.296849	0.23	0.166	1.47416e-05
SMNDC1	8.23709e-10	0.470932	0.173	0.102	1.48902e-05
CTSB	8.26453e-10	0.104847	0.189	0.135	1.49398e-05
SCFD2	8.39555e-10	0.580193	0.131	0.068	1.51766e-05
EXOC1	8.44389e-10	-0.166756	0.155	0.133	1.5264e-05
TRAPPC11	8.46404e-10	0.861721	0.172	0.08	1.53004e-05
RAB3IP	8.55244e-10	0.66251	0.156	0.081	1.54602e-05
ZNF644	9.03294e-10	0.110204	0.381	0.3	1.63288e-05
ENTPD7	9.15329e-10	1.01855	0.093	0.033	1.65464e-05
CELF2	9.19841e-10	-0.293078	0.23	0.22	1.6628e-05
INTS11	9.25716e-10	0.125968	0.183	0.133	1.67342e-05
SESN2	9.26369e-10	0.512736	0.124	0.072	1.6746e-05
SURF4	9.41242e-10	0.129165	0.206	0.145	1.70148e-05
EXOC4	9.43083e-10	-0.161398	0.137	0.11	1.70481e-05
CFAP36	9.60897e-10	0.206605	0.17	0.11	1.73701e-05
COPS7B	9.66713e-10	0.118074	0.119	0.074	1.74753e-05
CALM2	9.80895e-10	-0.223652	0.207	0.191	1.77316e-05
ZNF131	9.90901e-10	0.905862	0.115	0.046	1.79125e-05
KLC2	9.98198e-10	0.408851	0.168	0.096	1.80444e-05
CLCN3	9.9944e-10	0.248993	0.262	0.178	1.80669e-05
CCT4	1.01364e-09	0.116523	0.133	0.093	1.83236e-05
BET1L	1.02601e-09	0.558807	0.214	0.12	1.85471e-05
USP10	1.02678e-09	0.443202	0.152	0.092	1.85611e-05
PFKFB3	1.03292e-09	0.34771	0.106	0.067	1.86721e-05
FAM229B	1.05572e-09	0.588042	0.156	0.08	1.90843e-05
ECH1	1.08246e-09	0.105854	0.232	0.172	1.95677e-05
NME2	1.08727e-09	0.372381	0.158	0.096	1.96546e-05
EIF4A3	1.09134e-09	0.360533	0.205	0.125	1.97281e-05
TP53BP1	1.09727e-09	-0.109434	0.208	0.175	1.98354e-05
RBM5	1.12639e-09	0.196209	0.246	0.174	2.03618e-05
RAB35	1.14903e-09	0.380412	0.175	0.102	2.0771e-05
NCDN	1.16438e-09	-0.271442	0.118	0.104	2.10486e-05
SLC30A9	1.16502e-09	0.216967	0.209	0.148	2.10601e-05
ERLEC1	1.16725e-09	0.425409	0.219	0.135	2.11004e-05
SCAF8	1.1833e-09	0.38421	0.191	0.119	2.13905e-05
MAP2K1	1.21985e-09	0.709308	0.14	0.073	2.20511e-05
CLASP1	1.22274e-09	-0.306787	0.152	0.135	2.21035e-05
EXOC3	1.22812e-09	0.128832	0.113	0.076	2.22007e-05
FUCA1	1.23024e-09	0.675627	0.139	0.065	2.22391e-05
ZNF274	1.24214e-09	0.424339	0.137	0.073	2.24541e-05
TRAPPC9	1.25681e-09	0.162421	0.132	0.087	2.27193e-05
DERL1	1.26291e-09	0.448724	0.212	0.127	2.28296e-05
ERO1A	1.28751e-09	0.525278	0.25	0.152	2.32743e-05
MGAT5	1.29055e-09	0.249081	0.165	0.105	2.33292e-05
SFXN1	1.32217e-09	0.376838	0.294	0.192	2.39009e-05
EXT1	1.35661e-09	0.129149	0.18	0.127	2.45235e-05
CHD4	1.3614e-09	-0.123571	0.228	0.181	2.461e-05
TNPO2	1.37106e-09	0.159946	0.338	0.248	2.47846e-05
LRRC41	1.38407e-09	0.418782	0.198	0.117	2.50198e-05
TBCEL	1.4106e-09	0.283258	0.15	0.094	2.54993e-05
ANP32A	1.41409e-09	0.549919	0.114	0.059	2.55625e-05
PEA15	1.45156e-09	-0.273533	0.243	0.224	2.62398e-05
DUSP4	1.46026e-09	-0.700607	0.106	0.11	2.63972e-05
LONP1	1.48097e-09	0.116778	0.156	0.116	2.67714e-05
PES1	1.48195e-09	0.840444	0.183	0.09	2.67892e-05
OXA1L	1.49834e-09	0.264029	0.16	0.101	2.70856e-05
PLTP	1.50974e-09	0.42438	0.172	0.105	2.72915e-05
TIA1	1.51171e-09	-0.18899	0.226	0.198	2.73272e-05
AAK1	1.51449e-09	0.282456	0.213	0.143	2.73775e-05
SESN1	1.52646e-09	0.70596	0.12	0.05	2.75938e-05
GGNBP2	1.52926e-09	0.436725	0.126	0.066	2.76444e-05
MIB2	1.53467e-09	0.48072	0.163	0.095	2.77423e-05
LMTK3	1.53922e-09	0.109472	0.178	0.127	2.78245e-05
SOX1	1.56569e-09	-1.55381	0.047	0.104	2.83029e-05
GOLGA7	1.57063e-09	0.464343	0.203	0.112	2.83923e-05
GPRC5C	1.60176e-09	1.67556	0.067	0.013	2.8955e-05
M6PR	1.60565e-09	0.349191	0.114	0.062	2.90253e-05
RIC8A	1.62265e-09	0.347612	0.156	0.089	2.93326e-05
FTO	1.6233e-09	0.323933	0.12	0.07	2.93444e-05
GLUL	1.73276e-09	-0.248838	0.139	0.115	3.1323e-05
TMEM9B	1.73728e-09	0.53326	0.178	0.099	3.14047e-05
ME2	1.73946e-09	0.27525	0.128	0.076	3.14442e-05
STX16	1.74725e-09	0.189733	0.241	0.175	3.1585e-05
SLC25A26	1.75427e-09	0.735677	0.112	0.049	3.17119e-05
NSA2	1.76556e-09	0.106074	0.153	0.103	3.19161e-05
ARID3B	1.76588e-09	0.252587	0.098	0.054	3.19218e-05
SH3GL3	1.78301e-09	0.348408	0.088	0.048	3.22314e-05
RAB12	1.81171e-09	0.277543	0.206	0.13	3.27503e-05
FBXW2	1.81782e-09	0.275155	0.203	0.136	3.28607e-05
CAPNS1	1.81852e-09	0.365824	0.151	0.091	3.28734e-05
PPP2R2B	1.81964e-09	-0.319908	0.116	0.098	3.28937e-05
LARP7	1.82205e-09	0.116054	0.093	0.057	3.29372e-05
NOL7	1.87745e-09	0.169328	0.13	0.078	3.39386e-05
DOCK7	1.87771e-09	-0.198958	0.155	0.131	3.39434e-05
LY6H	1.89408e-09	-0.231556	0.172	0.145	3.42393e-05
MYDGF	1.9221e-09	0.265687	0.214	0.134	3.47458e-05
TSG101	1.92762e-09	0.687623	0.163	0.075	3.48456e-05
CHMP5	1.95689e-09	0.403825	0.189	0.115	3.53747e-05
OTUB1	1.97271e-09	0.254103	0.125	0.078	3.56607e-05
EIF5B	1.98183e-09	0.458401	0.142	0.078	3.58256e-05
EPN1	1.98297e-09	0.24892	0.33	0.242	3.58462e-05
GZF1	2.00658e-09	0.681245	0.123	0.056	3.6273e-05
MAPK8IP3	2.00888e-09	0.265383	0.175	0.112	3.63145e-05
SEC22B	2.01262e-09	0.61797	0.208	0.119	3.63822e-05
GLG1	2.01296e-09	0.845414	0.163	0.077	3.63883e-05
PPIE	2.01385e-09	0.69636	0.143	0.066	3.64045e-05
CRKL	2.02814e-09	0.214838	0.22	0.153	3.66627e-05
TOMM70	2.02937e-09	0.456777	0.188	0.109	3.66848e-05
CNN3	2.03071e-09	-0.559971	0.194	0.212	3.67091e-05
NSF	2.03641e-09	0.340508	0.213	0.136	3.68121e-05
ATG9A	2.04462e-09	1.13939	0.089	0.036	3.69607e-05
MTOR	2.04557e-09	0.510362	0.11	0.054	3.69778e-05
CD47	2.04947e-09	-0.178861	0.178	0.155	3.70483e-05
CLEC16A	2.07236e-09	0.321905	0.13	0.074	3.74621e-05
UBE3A	2.0764e-09	0.228167	0.179	0.12	3.7535e-05
SPECC1	2.08872e-09	0.399858	0.188	0.109	3.77578e-05
RNF149	2.10076e-09	-0.193103	0.112	0.081	3.79754e-05
FOXK2	2.1281e-09	-0.20351	0.117	0.083	3.84697e-05
NPLOC4	2.17279e-09	0.154619	0.158	0.108	3.92776e-05
PEX3	2.18445e-09	0.527658	0.095	0.043	3.94883e-05
PPM1A	2.19665e-09	0.249945	0.193	0.127	3.97088e-05
SARAF	2.21145e-09	0.161183	0.283	0.206	3.99765e-05
APTX	2.22488e-09	0.304487	0.106	0.059	4.02191e-05
UTP23	2.22823e-09	0.36413	0.132	0.075	4.02798e-05
PSD	2.23543e-09	0.119654	0.262	0.194	4.04099e-05
TMEM178B	2.24352e-09	-0.354328	0.178	0.173	4.05562e-05
FRMD4A	2.24486e-09	-0.120081	0.119	0.093	4.05804e-05
PDZD4	2.27083e-09	-0.2962	0.14	0.127	4.10499e-05
SMARCAD1	2.27815e-09	-0.156678	0.173	0.136	4.11821e-05
FAM8A1	2.2859e-09	0.4816	0.13	0.067	4.13222e-05
UBE2E3	2.34903e-09	-0.534242	0.173	0.189	4.24634e-05
TSTD2	2.35525e-09	-0.158967	0.135	0.102	4.25758e-05
LRP11	2.36005e-09	0.815535	0.159	0.08	4.26627e-05
HACD2	2.36878e-09	1.09243	0.073	0.024	4.28204e-05
VASH1	2.37966e-09	-0.233957	0.162	0.142	4.30171e-05
NCS1	2.39344e-09	0.328542	0.197	0.128	4.32661e-05
PITRM1	2.41053e-09	0.671879	0.153	0.08	4.35752e-05
ATP5MC3	2.41213e-09	0.315977	0.161	0.097	4.3604e-05
STK32A	2.42045e-09	1.00531	0.044	0.008	4.37544e-05
SF3B3	2.42815e-09	0.180804	0.222	0.155	4.38937e-05
ZC3H15	2.48907e-09	-0.134486	0.168	0.13	4.4995e-05
CNOT2	2.49886e-09	0.423445	0.129	0.068	4.51719e-05
LSAMP	2.51342e-09	-0.723801	0.135	0.161	4.54352e-05
FIS1	2.51532e-09	0.40526	0.104	0.066	4.54695e-05
FAF2	2.51928e-09	0.390732	0.156	0.089	4.5541e-05
SCAMP5	2.5382e-09	0.239817	0.253	0.178	4.58831e-05
DYNC1H1	2.54063e-09	0.358004	0.197	0.11	4.5927e-05
SLC23A2	2.5443e-09	0.360801	0.143	0.077	4.59934e-05
OXNAD1	2.546e-09	0.837698	0.15	0.065	4.60241e-05
CCNK	2.58286e-09	0.381261	0.24	0.145	4.66903e-05
SNF8	2.61294e-09	0.260147	0.225	0.146	4.72341e-05
FZD3	2.61997e-09	-0.272148	0.176	0.149	4.73612e-05
MIB1	2.64183e-09	0.185294	0.261	0.183	4.77564e-05
GPR162	2.67465e-09	-0.362695	0.106	0.081	4.83496e-05
ORMDL1	2.69671e-09	0.20426	0.217	0.147	4.87484e-05
SCAMP1	2.69868e-09	0.173261	0.198	0.132	4.8784e-05
PCDHGB6	2.7612e-09	-0.29597	0.187	0.18	4.99143e-05
ZYX	2.78105e-09	0.315857	0.176	0.11	5.02731e-05
NALCN	2.81589e-09	0.136581	0.105	0.059	5.09028e-05
ZSCAN30	2.8218e-09	0.38279	0.116	0.065	5.10096e-05
EXOSC7	2.88567e-09	0.396842	0.142	0.081	5.21643e-05
NAP1L3	2.94172e-09	0.482433	0.208	0.127	5.31775e-05
SMPD4	2.94955e-09	0.154513	0.129	0.088	5.33191e-05
SCG2	3.00855e-09	0.205778	0.171	0.112	5.43856e-05
PNMA2	3.09626e-09	-0.430291	0.202	0.205	5.59711e-05
PSPC1	3.18357e-09	-0.35215	0.177	0.174	5.75493e-05
HIST1H2AE	3.19214e-09	-1.21414	0.071	0.114	5.77044e-05
EPB41	3.30864e-09	0.107101	0.139	0.1	5.98103e-05
ARPC2	3.33351e-09	0.644944	0.198	0.1	6.02599e-05
SPNS1	3.33389e-09	0.247739	0.229	0.161	6.02666e-05
GBF1	3.34849e-09	0.388152	0.163	0.101	6.05306e-05
ASB8	3.37717e-09	0.224317	0.14	0.082	6.10491e-05
TRIM23	3.38143e-09	0.560621	0.133	0.071	6.11261e-05
LRRC47	3.43652e-09	0.24243	0.23	0.152	6.2122e-05
NSD3	3.4713e-09	-0.110028	0.179	0.139	6.27507e-05
RAD50	3.49836e-09	0.340233	0.079	0.041	6.32399e-05
CHD8	3.51913e-09	-0.210616	0.153	0.13	6.36152e-05
SMARCC1	3.53191e-09	-0.157513	0.201	0.167	6.38464e-05
GTF2H4	3.59315e-09	-0.541956	0.095	0.092	6.49535e-05
BABAM1	3.63845e-09	-0.129819	0.142	0.11	6.57723e-05
BANF1	3.66313e-09	0.276641	0.215	0.142	6.62184e-05
CIAO2B	3.67788e-09	0.644163	0.15	0.071	6.6485e-05
NAT9	3.6894e-09	0.275096	0.135	0.076	6.66933e-05
PTPRF	3.69129e-09	0.210264	0.175	0.113	6.67275e-05
SLBP	3.70387e-09	0.344388	0.139	0.081	6.69549e-05
KIF1B	3.75658e-09	-0.739101	0.268	0.308	6.79077e-05
SF3B5	3.83435e-09	-0.112901	0.129	0.111	6.93135e-05
PPAN	3.88443e-09	0.714667	0.129	0.064	7.02188e-05
SNRPD2	3.88953e-09	0.522765	0.204	0.113	7.0311e-05
ATP6V1E1	3.98424e-09	0.30619	0.215	0.142	7.20231e-05
PPME1	4.01088e-09	0.265768	0.198	0.137	7.25046e-05
NPEPPS	4.02844e-09	-0.299108	0.17	0.163	7.2822e-05
MCF2L	4.04896e-09	-0.161642	0.192	0.166	7.31931e-05
KLHL24	4.06204e-09	-0.253092	0.158	0.134	7.34294e-05
MOCS2	4.09597e-09	0.574138	0.15	0.081	7.40429e-05
MTHFD2	4.10142e-09	0.445567	0.142	0.085	7.41415e-05
MAX	4.13718e-09	0.243501	0.217	0.156	7.47879e-05
SLC16A3	4.14154e-09	0.437367	0.152	0.088	7.48666e-05
APPL1	4.16092e-09	0.522547	0.166	0.107	7.5217e-05
XPC	4.25795e-09	0.302343	0.111	0.069	7.6971e-05
LSG1	4.26247e-09	0.555789	0.113	0.056	7.70526e-05
PSMD3	4.3015e-09	0.136878	0.267	0.193	7.77582e-05
MAP9	4.30366e-09	0.844378	0.147	0.065	7.77973e-05
POLR2A	4.32218e-09	0.221544	0.238	0.178	7.8132e-05
WIZ	4.4132e-09	-0.263119	0.181	0.172	7.97774e-05
RRAGA	4.49487e-09	-0.155347	0.148	0.117	8.12538e-05
TCEAL3	4.50028e-09	0.845088	0.127	0.059	8.13515e-05
CPSF6	4.51283e-09	-0.250161	0.23	0.212	8.15784e-05
MAPK10	4.54358e-09	-0.328094	0.153	0.144	8.21342e-05
AAMP	4.55635e-09	0.351522	0.252	0.165	8.23651e-05
TP53I11	4.57067e-09	0.287711	0.141	0.08	8.2624e-05
DHX15	4.59082e-09	-0.322011	0.22	0.198	8.29882e-05
PTS	4.60827e-09	0.107455	0.139	0.093	8.33037e-05
LYRM1	4.61422e-09	0.205193	0.106	0.059	8.34112e-05
MOB4	4.63516e-09	0.155582	0.228	0.16	8.37897e-05
LAGE3	4.66472e-09	0.290263	0.112	0.065	8.43241e-05
RRP12	4.72277e-09	1.11352	0.1	0.038	8.53735e-05
NHLRC2	4.80112e-09	-0.20855	0.11	0.08	8.67898e-05
DNTTIP2	4.84375e-09	0.694938	0.16	0.078	8.75604e-05
GPN3	4.85988e-09	1.33255	0.093	0.029	8.7852e-05
GNG2	4.95404e-09	-0.523229	0.254	0.291	8.95542e-05
DROSHA	4.98978e-09	0.455424	0.18	0.112	9.02002e-05
TSPYL1	5.07495e-09	0.29727	0.195	0.12	9.17399e-05
TANC2	5.07633e-09	-0.347625	0.191	0.186	9.17648e-05
CAPRIN1	5.12242e-09	0.355841	0.157	0.091	9.25979e-05
SMDT1	5.21123e-09	0.231989	0.163	0.11	9.42035e-05
ZZEF1	5.26134e-09	0.510047	0.139	0.074	9.51092e-05
NOP56	5.29716e-09	-0.273715	0.183	0.161	9.57567e-05
QKI	5.33337e-09	-1.77525	0.078	0.176	9.64113e-05
DALRD3	5.35956e-09	0.681131	0.126	0.063	9.68848e-05
RABEP1	5.37685e-09	0.273578	0.176	0.113	9.71974e-05
SELENOT	5.39346e-09	0.360728	0.129	0.078	9.74975e-05
CADPS	5.46306e-09	-0.242784	0.171	0.153	9.87557e-05
TXLNG	5.5149e-09	1.01737	0.111	0.043	9.96928e-05
ATXN2L	5.65276e-09	0.236463	0.121	0.076	0.000102185
UBE2Q1	5.67335e-09	0.448101	0.175	0.102	0.000102557
GBX1	5.6897e-09	-1.52059	0.035	0.074	0.000102853
SYT1	5.71571e-09	-0.515003	0.228	0.229	0.000103323
ENTPD4	5.75905e-09	0.132629	0.196	0.128	0.000104106
PAX6	5.91945e-09	0.877487	0.073	0.027	0.000107006
POLR2B	5.92797e-09	-0.242006	0.155	0.134	0.00010716
DNAH14	5.96426e-09	0.697118	0.121	0.052	0.000107816
ADAMTS13	5.99979e-09	0.397428	0.115	0.066	0.000108458
C9orf78	6.02043e-09	0.373494	0.145	0.083	0.000108831
MAP4K4	6.0657e-09	-0.324913	0.27	0.263	0.00010965
HMGCLL1	6.10555e-09	0.12248	0.099	0.062	0.00011037
TSPYL2	6.3118e-09	0.642001	0.161	0.085	0.000114098
FAM98A	6.33747e-09	0.940674	0.099	0.039	0.000114562
CHID1	6.35924e-09	0.243134	0.207	0.14	0.000114956
AP2B1	6.58988e-09	0.199889	0.143	0.093	0.000119125
MAP1A	6.65666e-09	0.172848	0.154	0.104	0.000120332
VPS26B	6.6807e-09	0.370481	0.185	0.125	0.000120767
TPM1	6.6947e-09	-0.413458	0.117	0.115	0.00012102
FARSA	6.70777e-09	0.140277	0.216	0.15	0.000121256
CHURC1	6.88516e-09	-0.144797	0.137	0.107	0.000124463
CGGBP1	6.94547e-09	-0.125704	0.184	0.144	0.000125553
TSSC4	7.02368e-09	0.559953	0.115	0.055	0.000126967
EDC4	7.0655e-09	0.445864	0.136	0.073	0.000127723
ANKRD13A	7.08753e-09	0.341718	0.104	0.055	0.000128121
USP22	7.18234e-09	-0.34741	0.242	0.236	0.000129835
DPY19L3	7.25204e-09	0.351362	0.137	0.08	0.000131095
UBQLN1	7.34041e-09	0.102225	0.178	0.125	0.000132693
GNAO1	7.4785e-09	-0.274192	0.226	0.221	0.000135189
EIF1AD	7.55169e-09	0.28017	0.103	0.059	0.000136512
CDKN1B	7.5632e-09	-0.332043	0.212	0.189	0.00013672
PRPF39	7.63076e-09	0.271503	0.152	0.1	0.000137941
CRY2	7.63242e-09	0.830244	0.119	0.056	0.000137971
ATP6V1G2	7.69437e-09	0.197486	0.169	0.117	0.000139091
DNHD1	7.73577e-09	0.244169	0.104	0.06	0.000139839
SV2A	7.74226e-09	-0.208946	0.184	0.166	0.000139957
OS9	7.76374e-09	0.285403	0.217	0.142	0.000140345
OGFOD1	8.0369e-09	0.740353	0.115	0.056	0.000145283
ZDHHC21	8.18769e-09	-0.331216	0.11	0.09	0.000148009
DUSP11	8.2152e-09	0.461392	0.143	0.085	0.000148506
WSB2	8.34327e-09	-0.330625	0.201	0.191	0.000150821
ORC4	8.34685e-09	0.373094	0.176	0.11	0.000150886
METTL9	8.37784e-09	-0.178641	0.193	0.174	0.000151446
ATM	8.49352e-09	0.268681	0.134	0.08	0.000153537
PSENEN	8.50747e-09	0.306201	0.141	0.086	0.00015379
TUSC2	8.52e-09	0.912674	0.122	0.048	0.000154016
NUS1	8.52567e-09	0.30702	0.194	0.129	0.000154119
TBC1D15	8.6092e-09	0.211701	0.167	0.103	0.000155629
RHOB	8.62859e-09	0.162316	0.193	0.134	0.000155979
FNBP4	8.7076e-09	0.296139	0.224	0.159	0.000157407
MTX2	8.74106e-09	0.448326	0.16	0.091	0.000158012
SLC35F6	8.74585e-09	0.485062	0.131	0.074	0.000158099
PRDX4	8.83191e-09	0.86334	0.165	0.076	0.000159655
CYB5B	8.83442e-09	0.139471	0.19	0.127	0.0001597
ARF5	8.87578e-09	0.212818	0.191	0.131	0.000160448
ATP1B2	8.9045e-09	-0.189827	0.199	0.169	0.000160967
PSMD12	8.94439e-09	0.445668	0.191	0.122	0.000161688
VPS39	9.09004e-09	0.276315	0.125	0.081	0.000164321
TOMM6	9.09238e-09	0.630492	0.128	0.062	0.000164363
TMUB2	9.11842e-09	0.421926	0.163	0.096	0.000164834
TAF15	9.12966e-09	0.180712	0.136	0.086	0.000165037
TM9SF4	9.13737e-09	0.107923	0.117	0.071	0.000165176
ZEB1	9.19765e-09	0.132865	0.153	0.103	0.000166266
IGSF9B	9.22189e-09	0.558837	0.116	0.059	0.000166704
ATAD2B	9.45692e-09	-0.36782	0.1	0.078	0.000170953
MMADHC	9.61462e-09	0.374509	0.117	0.069	0.000173804
DTD1	9.65507e-09	-0.208109	0.213	0.183	0.000174535
TRIB2	9.82701e-09	-0.333962	0.207	0.21	0.000177643
TCEAL4	9.84675e-09	-0.116976	0.146	0.126	0.000178
COX18	9.86102e-09	0.230545	0.139	0.081	0.000178258
PARN	9.874e-09	0.441841	0.145	0.076	0.000178492
MED16	1.01539e-08	-0.344946	0.078	0.071	0.000183552
DARS	1.01854e-08	0.149362	0.186	0.137	0.000184122
PRRT2	1.02086e-08	-0.184856	0.163	0.132	0.00018454
ARFIP2	1.0239e-08	0.508784	0.177	0.103	0.00018509
TOP2B	1.03797e-08	-0.502024	0.126	0.129	0.000187633
ECEL1	1.03936e-08	-0.583014	0.142	0.156	0.000187886
WDR61	1.05542e-08	0.572935	0.151	0.082	0.000190789
ABAT	1.06469e-08	-0.282816	0.235	0.214	0.000192465
DTNA	1.08059e-08	-0.133672	0.209	0.172	0.000195339
CRY1	1.0893e-08	0.16958	0.11	0.067	0.000196913
SCNM1	1.09701e-08	0.541367	0.158	0.09	0.000198307
UBXN2B	1.10059e-08	0.189085	0.139	0.096	0.000198954
FAF1	1.12778e-08	0.45449	0.142	0.085	0.00020387
CHMP4A	1.13121e-08	0.463096	0.125	0.062	0.000204488
TMEM14B	1.14569e-08	1.2724	0.097	0.035	0.000207107
TMEM41B	1.16337e-08	0.21517	0.235	0.156	0.000210303
TUBE1	1.16878e-08	0.292711	0.116	0.071	0.000211281
ELP1	1.20987e-08	0.232537	0.151	0.095	0.000218709
NDUFB2	1.22136e-08	0.277609	0.157	0.099	0.000220785
TRIM7	1.22913e-08	2.9242	0.035	0.005	0.00022219
NDUFS5	1.23985e-08	0.20414	0.203	0.14	0.000224128
HCFC1R1	1.25006e-08	0.460204	0.107	0.057	0.000225974
GNG4	1.2711e-08	0.207754	0.224	0.162	0.000229776
ZNF24	1.28038e-08	-0.138503	0.162	0.129	0.000231454
BUD23	1.28237e-08	0.204232	0.145	0.094	0.000231814
ESYT2	1.29312e-08	0.423312	0.134	0.08	0.000233757
CBX3	1.29408e-08	-0.460123	0.17	0.172	0.00023393
EXOC2	1.31907e-08	0.253846	0.106	0.066	0.000238448
CUL3	1.3207e-08	-0.252826	0.197	0.183	0.000238742
PPP1R9B	1.32166e-08	-0.41722	0.14	0.125	0.000238917
RAB11FIP2	1.32825e-08	0.459036	0.099	0.054	0.000240107
SLC16A1	1.33412e-08	-0.360139	0.107	0.096	0.00024117
MICU2	1.33484e-08	0.126361	0.206	0.144	0.000241299
LPCAT1	1.33549e-08	0.277951	0.148	0.092	0.000241416
CLIP1	1.34081e-08	-0.188687	0.127	0.102	0.000242378
YWHAE	1.35613e-08	-0.191976	0.316	0.283	0.000245148
SMIM14	1.36871e-08	0.520258	0.147	0.086	0.000247422
ATXN10	1.38664e-08	-0.16982	0.199	0.176	0.000250663
TBL3	1.38799e-08	0.289784	0.117	0.072	0.000250907
SELENOM	1.40099e-08	0.716779	0.093	0.035	0.000253256
TOLLIP	1.40286e-08	0.501954	0.113	0.057	0.000253596
ZNF512B	1.44826e-08	-0.171358	0.114	0.093	0.000261802
ITFG1	1.45109e-08	-0.257353	0.17	0.144	0.000262313
MFN2	1.46144e-08	0.149927	0.162	0.106	0.000264185
BRSK2	1.46222e-08	-0.412587	0.12	0.117	0.000264326
USPL1	1.46335e-08	0.969731	0.085	0.038	0.000264529
GABRA2	1.48194e-08	-0.195253	0.134	0.111	0.00026789
SLC4A8	1.48232e-08	-0.175791	0.17	0.144	0.000267959
LBH	1.48477e-08	-0.463556	0.129	0.125	0.000268402
CYBC1	1.50896e-08	-0.117115	0.11	0.085	0.000272775
STMP1	1.52141e-08	0.116902	0.2	0.145	0.000275025
NAA38	1.54445e-08	0.327735	0.156	0.096	0.00027919
ASNSD1	1.54479e-08	-0.233777	0.11	0.09	0.000279253
GCN1	1.54638e-08	0.382579	0.129	0.07	0.000279539
NCBP1	1.54716e-08	0.806546	0.11	0.05	0.00027968
MGAT4A	1.54789e-08	0.854339	0.1	0.042	0.000279812
POLR2L	1.55498e-08	0.290847	0.198	0.128	0.000281093
APAF1	1.55798e-08	0.352861	0.099	0.05	0.000281636
ZNF441	1.56876e-08	0.147566	0.095	0.06	0.000283584
CYB5R1	1.57533e-08	0.394621	0.107	0.059	0.000284773
AFTPH	1.62075e-08	0.207261	0.09	0.054	0.000292984
ZNF12	1.64853e-08	1.15606	0.102	0.034	0.000298005
PBX1	1.64903e-08	-0.968799	0.095	0.136	0.000298095
TOPBP1	1.67379e-08	0.486843	0.144	0.078	0.00030257
GPT2	1.70031e-08	0.352177	0.139	0.073	0.000307365
PSMD7	1.70217e-08	0.287027	0.145	0.093	0.000307701
ATG4A	1.71133e-08	1.53933	0.067	0.018	0.000309357
EIF3G	1.74124e-08	0.43287	0.106	0.054	0.000314763
CWC27	1.75054e-08	-0.533548	0.094	0.089	0.000316445
MEX3A	1.77254e-08	-0.470286	0.146	0.15	0.000320422
FBXW8	1.77546e-08	0.284591	0.133	0.081	0.000320951
NOL4L	1.78202e-08	-0.237845	0.148	0.127	0.000322136
BBS7	1.82304e-08	0.751688	0.105	0.047	0.000329551
NRCAM	1.8245e-08	-0.124673	0.207	0.175	0.000329815
KPNA1	1.83276e-08	-0.206764	0.204	0.167	0.000331308
ZFHX3	1.83416e-08	-0.208004	0.161	0.137	0.000331561
TIMM21	1.84449e-08	0.320311	0.11	0.065	0.000333428
MON2	1.84532e-08	0.602534	0.161	0.089	0.000333579
NMD3	1.85421e-08	0.582014	0.139	0.075	0.000335185
TASOR2	1.87354e-08	0.266622	0.143	0.093	0.000338681
TNPO3	1.88161e-08	0.354348	0.246	0.167	0.000340139
COMMD6	1.88506e-08	-0.230945	0.16	0.128	0.000340762
BICD1	1.88835e-08	0.414181	0.152	0.093	0.000341358
TMEM184C	1.9471e-08	0.475574	0.122	0.063	0.000351977
PIGH	1.95523e-08	0.761391	0.114	0.056	0.000353447
AKAP8L	1.97936e-08	0.136124	0.213	0.157	0.00035781
SPG21	1.98458e-08	0.164792	0.176	0.121	0.000358752
ZNF639	2.03082e-08	0.369786	0.136	0.079	0.000367111
ZNF638	2.0375e-08	-0.10577	0.233	0.199	0.000368319
PDHX	2.0394e-08	0.654381	0.14	0.078	0.000368662
ZFR	2.04751e-08	0.243451	0.193	0.142	0.000370129
ZNF121	2.06488e-08	0.166903	0.116	0.072	0.000373268
PDPK1	2.10932e-08	0.620683	0.085	0.036	0.000381302
CLSTN3	2.1592e-08	-0.175959	0.202	0.175	0.000390319
EXOC6B	2.16166e-08	0.160982	0.184	0.132	0.000390763
KIF2A	2.17329e-08	-0.206387	0.166	0.144	0.000392865
ANKHD1	2.18534e-08	0.245301	0.171	0.124	0.000395045
CLNS1A	2.19977e-08	0.453324	0.159	0.088	0.000397652
NCAN	2.25723e-08	-0.277736	0.192	0.176	0.000408039
COX16	2.26041e-08	0.468732	0.202	0.113	0.000408615
IER3IP1	2.26485e-08	0.447806	0.119	0.069	0.000409416
TBC1D24	2.29587e-08	0.143759	0.085	0.052	0.000415024
RBPJ	2.31024e-08	0.396837	0.124	0.072	0.000417623
PTRH2	2.31052e-08	0.934785	0.091	0.038	0.000417672
NUP93	2.32861e-08	-0.676703	0.117	0.133	0.000420943
PHKB	2.35383e-08	0.540262	0.159	0.09	0.000425503
EIF4E	2.35555e-08	0.306772	0.125	0.066	0.000425812
MTHFR	2.39693e-08	0.134941	0.112	0.075	0.000433293
TLE5	2.40645e-08	-0.192853	0.16	0.137	0.000435014
YIPF5	2.40726e-08	0.279249	0.206	0.143	0.000435161
ABHD10	2.40788e-08	0.609793	0.129	0.064	0.000435273
PTPN4	2.418e-08	-0.101536	0.104	0.075	0.000437102
CCDC7	2.42242e-08	0.275783	0.079	0.042	0.0004379
PA2G4	2.45813e-08	0.34754	0.167	0.105	0.000444356
PPM1K	2.45832e-08	0.266227	0.142	0.084	0.00044439
LRRC59	2.48795e-08	0.412219	0.173	0.105	0.000449747
COPS2	2.51645e-08	0.194276	0.235	0.168	0.000454899
MLLT1	2.56715e-08	-0.420414	0.124	0.12	0.000464063
CCNT1	2.60488e-08	0.813821	0.156	0.076	0.000470884
MAN1B1	2.62983e-08	0.394345	0.157	0.096	0.000475394
ABCA5	2.63707e-08	0.404504	0.118	0.064	0.000476703
CHERP	2.64727e-08	0.337479	0.196	0.127	0.000478547
ALDH18A1	2.67037e-08	0.292461	0.151	0.093	0.000482723
MALSU1	2.70173e-08	0.470906	0.152	0.082	0.000488391
C19orf25	2.73373e-08	0.715794	0.121	0.059	0.000494176
C17orf49	2.78603e-08	0.222203	0.116	0.075	0.000503631
FABP3	2.80148e-08	1.42494	0.097	0.029	0.000506424
FAM160A2	2.80589e-08	0.694932	0.12	0.058	0.00050722
DYNC1LI1	2.83562e-08	0.13796	0.132	0.087	0.000512595
MINK1	2.85709e-08	0.235657	0.158	0.102	0.000516475
GARS	2.86166e-08	0.124875	0.135	0.097	0.000517303
REPIN1	2.86715e-08	0.455587	0.109	0.055	0.000518295
SESTD1	2.87435e-08	-0.186592	0.193	0.172	0.000519596
UBE2R2	2.8867e-08	-0.256312	0.263	0.237	0.000521829
CDK5R2	2.90535e-08	-0.105829	0.09	0.066	0.000525201
CCSER2	2.92666e-08	-0.123341	0.184	0.151	0.000529053
SNRNP200	3.02384e-08	-0.28269	0.229	0.214	0.000546619
CCNG2	3.02989e-08	-0.126123	0.166	0.13	0.000547713
PCGF3	3.04545e-08	-0.291278	0.137	0.126	0.000550526
DDX51	3.0513e-08	0.523184	0.09	0.04	0.000551584
APOE	3.08279e-08	0.542102	0.114	0.068	0.000557276
LRCH2	3.11829e-08	0.631371	0.14	0.075	0.000563692
TMEM214	3.15048e-08	0.370366	0.09	0.048	0.000569513
SENP2	3.15259e-08	-0.105432	0.132	0.099	0.000569893
UBR2	3.15706e-08	0.209709	0.117	0.073	0.000570702
FNDC3A	3.16204e-08	-0.354251	0.08	0.068	0.000571601
PRKRA	3.20708e-08	0.184424	0.157	0.105	0.000579744
RTRAF	3.26684e-08	0.110621	0.144	0.102	0.000590546
SMARCE1	3.26911e-08	-0.137027	0.153	0.123	0.000590957
JPH4	3.31278e-08	-0.187997	0.182	0.161	0.000598852
DNAJC4	3.37168e-08	0.582672	0.113	0.056	0.000609499
MED10	3.37509e-08	0.358856	0.226	0.152	0.000610115
ASS1	3.41538e-08	1.03783	0.076	0.025	0.000617399
ATRN	3.46278e-08	0.251981	0.183	0.12	0.000625966
ELOC	3.49486e-08	0.176393	0.136	0.089	0.000631767
BRD4	3.5426e-08	0.108682	0.243	0.183	0.000640396
ACD	3.5879e-08	0.279198	0.129	0.079	0.000648584
BRWD1	3.63843e-08	0.307	0.196	0.122	0.000657718
SMIM29	3.64023e-08	0.161863	0.116	0.075	0.000658045
PPP1R16A	3.69484e-08	0.708957	0.135	0.072	0.000667915
ZBTB44	3.70866e-08	0.257164	0.134	0.082	0.000670415
PAK1IP1	3.83205e-08	0.883888	0.117	0.05	0.000692719
ARFGAP1	3.84894e-08	0.177395	0.11	0.065	0.000695773
TMEM39A	3.85321e-08	0.540381	0.135	0.075	0.000696545
BCL2L1	3.98321e-08	0.748248	0.197	0.105	0.000720044
MED1	3.98613e-08	0.320259	0.122	0.071	0.000720572
ECSIT	3.99014e-08	-0.129323	0.126	0.097	0.000721298
CLCC1	3.99829e-08	0.458294	0.197	0.127	0.00072277
PPOX	4.00244e-08	0.387267	0.141	0.086	0.000723521
EPC1	4.0928e-08	-0.187183	0.182	0.161	0.000739855
MMUT	4.12813e-08	0.631592	0.156	0.09	0.000746242
BBS10	4.2808e-08	1.24243	0.085	0.032	0.00077384
RAB3C	4.30223e-08	-0.22935	0.148	0.113	0.000777715
CMSS1	4.37155e-08	0.473166	0.146	0.081	0.000790245
PJA1	4.37407e-08	0.16844	0.182	0.123	0.0007907
PDK3	4.4403e-08	0.586862	0.074	0.032	0.000802674
TBC1D17	4.44944e-08	0.368696	0.091	0.05	0.000804326
DAB2IP	4.5119e-08	0.487343	0.112	0.058	0.000815617
SLC30A5	4.51641e-08	0.441932	0.131	0.071	0.000816431
ADPRHL2	4.52568e-08	0.293653	0.114	0.069	0.000818108
PWP1	4.55401e-08	0.222212	0.152	0.103	0.000823229
DLG2	4.60366e-08	-0.474416	0.101	0.084	0.000832203
DMAC1	4.63143e-08	0.128198	0.104	0.062	0.000837223
AP1B1	4.65673e-08	0.25628	0.173	0.122	0.000841798
ZNF254	4.66719e-08	-0.496833	0.146	0.153	0.000843688
DPF1	4.71006e-08	0.562659	0.139	0.075	0.000851437
SRGAP3	4.74162e-08	0.117227	0.144	0.101	0.000857142
TSC2	4.76134e-08	0.138295	0.097	0.066	0.000860707
RNF220	4.76173e-08	-0.339514	0.089	0.076	0.000860779
UNC119	4.77257e-08	0.561835	0.117	0.06	0.000862737
RAD21	4.79491e-08	-0.254515	0.101	0.084	0.000866776
ZFY	4.79566e-08	-8.57627	0	0.018	0.000866911
HINT1	4.87322e-08	0.206702	0.136	0.088	0.000880932
RAE1	4.93129e-08	0.491077	0.131	0.07	0.000891429
PSMG3	4.94676e-08	0.345765	0.165	0.106	0.000894227
MYT1	4.96716e-08	-0.451456	0.126	0.112	0.000897914
ERP44	5.0994e-08	0.608807	0.12	0.063	0.000921819
RNF38	5.16728e-08	-0.125524	0.202	0.17	0.00093409
KIAA2013	5.19518e-08	0.713385	0.08	0.039	0.000939133
CNOT6	5.19539e-08	-0.153985	0.142	0.116	0.000939171
PPP1R8	5.20449e-08	0.115585	0.12	0.083	0.000940816
2024-03-07	5.28717e-08	0.224025	0.222	0.161	0.000955761
PHKG2	5.2882e-08	0.70936	0.111	0.055	0.000955948
ABHD16A	5.29399e-08	0.278684	0.176	0.116	0.000956995
TIMM9	5.34071e-08	-0.130175	0.083	0.06	0.000965441
ZNF384	5.34232e-08	0.372998	0.202	0.132	0.000965731
RNF126	5.3671e-08	0.248669	0.124	0.076	0.000970211
COPS9	5.42592e-08	0.198052	0.092	0.055	0.000980844
CYC1	5.4516e-08	0.442401	0.213	0.127	0.000985487
PPP4R3B	5.46478e-08	0.287254	0.224	0.146	0.000987868
SUDS3	5.47959e-08	-0.182833	0.121	0.096	0.000990545
HS2ST1	5.50454e-08	-0.499273	0.102	0.092	0.000995055
ZNF598	5.5055e-08	0.650922	0.111	0.051	0.000995229
BECN1	5.52699e-08	0.793556	0.084	0.031	0.000999115
DNMT1	5.53448e-08	-0.27637	0.123	0.1	0.00100047
SPARC	5.56677e-08	-1.09215	0.081	0.107	0.0010063
COQ5	5.62887e-08	0.402807	0.127	0.072	0.00101753
SYMPK	5.6463e-08	0.126178	0.191	0.132	0.00102068
MTDH	5.67521e-08	0.392084	0.132	0.079	0.00102591
EIF2AK1	5.67574e-08	0.314052	0.173	0.108	0.001026
EWSR1	5.70008e-08	0.180009	0.17	0.125	0.0010304
DNM1L	5.74871e-08	0.116511	0.195	0.139	0.0010392
MAPK8IP1	5.81296e-08	-0.173083	0.202	0.186	0.00105081
ZC3H6	5.85405e-08	0.188503	0.117	0.074	0.00105824
METAP2	5.88738e-08	0.325791	0.117	0.068	0.00106426
TFRC	5.95995e-08	-0.357724	0.151	0.143	0.00107738
MED17	5.99854e-08	-0.10728	0.126	0.101	0.00108436
CACNG4	6.01466e-08	-0.442333	0.125	0.127	0.00108727
MAPK9	6.05259e-08	0.208503	0.156	0.108	0.00109413
TMEM256	6.11939e-08	0.236947	0.137	0.084	0.0011062
PPFIA2	6.13535e-08	-0.270351	0.096	0.075	0.00110909
ACTR1A	6.13742e-08	-0.143035	0.219	0.189	0.00110946
POLR2C	6.1437e-08	0.371396	0.146	0.089	0.0011106
ADD2	6.16219e-08	-0.173152	0.158	0.139	0.00111394
SCAP	6.182e-08	0.478561	0.167	0.099	0.00111752
MORF4L1	6.1991e-08	-0.294624	0.204	0.203	0.00112061
RNASEK	6.21752e-08	0.212493	0.181	0.121	0.00112394
CCNC	6.23181e-08	0.271294	0.152	0.091	0.00112652
EVI5	6.27608e-08	0.611327	0.121	0.062	0.00113453
CCDC174	6.27673e-08	0.534424	0.115	0.063	0.00113464
GDAP1	6.43899e-08	0.250968	0.203	0.139	0.00116398
SNAPC3	6.45069e-08	0.301624	0.192	0.129	0.00116609
TOM1L2	6.50248e-08	0.396602	0.166	0.104	0.00117545
KIF5C	6.50792e-08	-0.381962	0.329	0.34	0.00117644
SND1	6.5208e-08	0.526733	0.206	0.126	0.00117877
CEBPZ	6.5322e-08	0.320354	0.143	0.087	0.00118083
RUVBL2	6.54421e-08	0.367968	0.15	0.085	0.001183
CLINT1	6.55762e-08	0.32372	0.156	0.098	0.00118542
PPID	6.64939e-08	0.231591	0.115	0.07	0.00120201
PFKP	6.72838e-08	0.201163	0.144	0.097	0.00121629
NUMA1	6.76347e-08	0.199657	0.186	0.129	0.00122263
COPS7A	6.8279e-08	0.419662	0.121	0.07	0.00123428
MSL2	6.88577e-08	0.538235	0.139	0.077	0.00124474
COQ10B	6.91629e-08	0.502644	0.147	0.084	0.00125026
RINT1	7.07877e-08	0.288953	0.125	0.078	0.00127963
UNC50	7.13048e-08	0.374695	0.155	0.099	0.00128898
OPTN	7.16196e-08	0.464182	0.172	0.105	0.00129467
ZNF414	7.18049e-08	-0.107301	0.098	0.074	0.00129802
UBL5	7.29908e-08	-0.176725	0.205	0.183	0.00131945
EIF4E3	7.36331e-08	0.518075	0.132	0.075	0.00133107
AKR1A1	7.37807e-08	0.202746	0.199	0.14	0.00133373
DVL3	7.42796e-08	-0.147131	0.224	0.185	0.00134275
UBAP2L	7.52515e-08	0.132146	0.238	0.175	0.00136032
SLC1A4	7.53904e-08	0.430812	0.13	0.076	0.00136283
EXOC7	7.54668e-08	-0.296293	0.18	0.156	0.00136421
CA11	7.68278e-08	0.105208	0.123	0.073	0.00138882
H2AFY	7.70856e-08	0.271902	0.122	0.07	0.00139348
MBOAT7	7.86234e-08	0.351371	0.119	0.073	0.00142128
CHMP6	7.96387e-08	-0.404974	0.085	0.075	0.00143963
SNX19	8.03017e-08	0.134863	0.142	0.099	0.00145161
PAPOLA	8.04482e-08	0.320305	0.129	0.076	0.00145426
TMEM63B	8.04785e-08	-0.290727	0.11	0.095	0.00145481
TULP4	8.08538e-08	-0.406188	0.108	0.095	0.00146159
PRPF3	8.15564e-08	0.105651	0.167	0.119	0.00147429
FAM219B	8.19422e-08	-0.106614	0.146	0.12	0.00148127
EIF5	8.21612e-08	-0.199434	0.232	0.215	0.00148523
ARMCX3	8.33221e-08	-0.509535	0.111	0.111	0.00150621
CNOT8	8.46057e-08	0.256575	0.192	0.13	0.00152942
TTC17	8.51276e-08	0.27474	0.183	0.116	0.00153885
ATP5IF1	8.51941e-08	0.275033	0.166	0.107	0.00154005
EHMT2	8.65979e-08	0.121948	0.213	0.16	0.00156543
CRTAP	8.68619e-08	0.375765	0.105	0.059	0.0015702
SUMO2	8.71355e-08	-0.285051	0.263	0.24	0.00157515
RABGGTB	8.83279e-08	0.180638	0.177	0.125	0.0015967
SNAP91	8.96354e-08	0.243769	0.121	0.081	0.00162034
SLC35F5	9.0299e-08	-0.481059	0.109	0.103	0.00163233
LRRTM4	9.0322e-08	-0.493619	0.107	0.096	0.00163275
PSMA2	9.06644e-08	0.787978	0.12	0.059	0.00163894
CD276	9.11061e-08	-0.368504	0.147	0.139	0.00164692
TBC1D7	9.15688e-08	-0.224654	0.117	0.097	0.00165529
TRIP12	9.2369e-08	-0.143921	0.178	0.149	0.00166975
PRKCSH	9.24686e-08	0.398308	0.104	0.06	0.00167156
SSR3	9.25904e-08	0.457444	0.146	0.087	0.00167376
MGA	9.30755e-08	0.197492	0.134	0.091	0.00168253
ADIPOR1	9.38558e-08	0.445837	0.151	0.089	0.00169663
AKR7A2	9.46779e-08	0.252578	0.089	0.051	0.00171149
MADD	9.47786e-08	0.287369	0.147	0.085	0.00171331
VCAN	9.50151e-08	-0.914577	0.142	0.195	0.00171759
POLD2	9.56897e-08	0.444906	0.132	0.085	0.00172978
CHCHD3	9.66318e-08	0.454726	0.12	0.064	0.00174681
MED13L	9.70553e-08	0.376087	0.14	0.085	0.00175447
CEP70	9.73398e-08	0.392028	0.083	0.042	0.00175961
CEP95	9.86084e-08	0.176182	0.142	0.093	0.00178254
ESD	9.89656e-08	-0.266699	0.181	0.153	0.001789
SNX1	9.90029e-08	-0.392263	0.108	0.107	0.00178968
ACAP3	1.0017e-07	-0.543332	0.162	0.179	0.00181077
GOLGA3	1.01522e-07	-0.359167	0.097	0.096	0.00183521
GPM6B	1.01658e-07	-0.763603	0.155	0.189	0.00183767
DPCD	1.02074e-07	0.428356	0.147	0.087	0.00184519
HK2	1.02174e-07	0.610946	0.133	0.068	0.001847
LMBR1	1.03147e-07	0.223094	0.158	0.098	0.00186459
DDX50	1.03257e-07	0.536692	0.114	0.059	0.00186657
ATP6V0E2	1.03283e-07	-0.558181	0.115	0.123	0.00186704
FAM169A	1.04842e-07	-0.591924	0.084	0.082	0.00189523
PPP1R1A	1.0517e-07	0.248403	0.139	0.081	0.00190115
DDX49	1.05549e-07	0.431647	0.152	0.096	0.00190801
SLC16A14	1.05727e-07	0.456469	0.126	0.074	0.00191123
UBA5	1.07168e-07	0.275967	0.166	0.11	0.00193728
ZDHHC16	1.08269e-07	0.355037	0.116	0.069	0.00195718
ANO10	1.10831e-07	0.186399	0.149	0.099	0.0020035
PRR7	1.11742e-07	-0.612794	0.079	0.075	0.00201996
UBE2H	1.12089e-07	-0.162758	0.148	0.123	0.00202624
GALK2	1.12876e-07	0.967132	0.106	0.042	0.00204046
RMDN3	1.13201e-07	0.341579	0.175	0.11	0.00204633
CLTA	1.14593e-07	-0.197308	0.239	0.225	0.00207149
PFN2	1.16384e-07	-0.466655	0.333	0.346	0.00210388
RIMKLB	1.18036e-07	-0.116673	0.165	0.143	0.00213374
PUM2	1.18284e-07	0.119313	0.244	0.193	0.00213822
CASC4	1.20159e-07	0.237111	0.175	0.117	0.00217211
UGCG	1.2016e-07	0.381433	0.192	0.116	0.00217214
ZNF75A	1.20867e-07	0.455221	0.138	0.08	0.00218491
CEP192	1.20984e-07	0.401613	0.129	0.067	0.00218702
CYSTM1	1.21888e-07	1.00618	0.059	0.024	0.00220338
NUTF2	1.24291e-07	0.314918	0.14	0.091	0.0022468
TMED2	1.27267e-07	0.352137	0.14	0.081	0.0023006
SEC24D	1.27775e-07	0.789487	0.092	0.04	0.00230978
RAB33B	1.28954e-07	0.549968	0.112	0.059	0.0023311
SNAPIN	1.31266e-07	0.332308	0.074	0.042	0.0023729
SLC52A2	1.32247e-07	0.506198	0.094	0.051	0.00239063
RWDD4	1.32935e-07	0.973808	0.095	0.042	0.00240307
CIR1	1.33271e-07	0.713797	0.085	0.041	0.00240914
TIMM17B	1.35781e-07	0.152748	0.124	0.082	0.00245451
SSU72	1.37012e-07	0.528971	0.121	0.066	0.00247676
L1CAM	1.38594e-07	-0.735081	0.171	0.207	0.00250537
SLC39A6	1.38959e-07	-0.256961	0.187	0.182	0.00251196
ZBTB25	1.39178e-07	0.530426	0.13	0.076	0.00251593
MCEE	1.39518e-07	0.487877	0.097	0.052	0.00252207
TRIM24	1.40406e-07	-0.229809	0.167	0.144	0.00253813
CACNB1	1.41007e-07	-0.284226	0.113	0.102	0.00254898
CLUH	1.41388e-07	0.438981	0.096	0.054	0.00255588
ZC3H18	1.41674e-07	0.308705	0.115	0.067	0.00256105
ATP6V1F	1.42895e-07	-0.453363	0.156	0.163	0.00258311
RAB7A	1.44194e-07	0.239058	0.136	0.091	0.0026066
ZNF841	1.44542e-07	0.481119	0.08	0.042	0.00261288
EPB41L4B	1.44688e-07	1.02178	0.068	0.025	0.00261553
PTBP2	1.46234e-07	-0.204588	0.234	0.212	0.00264347
GRIPAP1	1.47751e-07	0.290427	0.178	0.115	0.0026709
IGFBPL1	1.47783e-07	-0.47303	0.129	0.136	0.00267148
CAMK2B	1.49348e-07	-0.15623	0.08	0.058	0.00269976
STMN1	1.49821e-07	-0.452123	0.141	0.154	0.00270831
BRF2	1.50187e-07	0.777799	0.094	0.046	0.00271493
TPRG1L	1.50913e-07	0.810277	0.116	0.059	0.00272806
MRFAP1L1	1.51421e-07	0.108757	0.227	0.178	0.00273724
ZMYM3	1.52958e-07	-0.369288	0.117	0.105	0.00276501
ZNF559	1.5349e-07	0.698492	0.128	0.066	0.00277463
DHX8	1.53509e-07	0.110859	0.137	0.094	0.00277497
UQCC2	1.53609e-07	0.166916	0.171	0.121	0.0027768
THUMPD1	1.54172e-07	0.435028	0.084	0.042	0.00278696
HMGN1	1.54619e-07	-0.202855	0.149	0.132	0.00279504
UBXN4	1.55336e-07	-0.202171	0.159	0.134	0.00280801
DCUN1D5	1.55955e-07	0.168976	0.158	0.105	0.0028192
TRA2B	1.5655e-07	0.105255	0.147	0.109	0.00282996
CYB5R3	1.56775e-07	0.233981	0.191	0.132	0.00283402
GANAB	1.57326e-07	0.495879	0.109	0.052	0.00284398
BAX	1.57965e-07	0.242713	0.109	0.076	0.00285554
TMEM120B	1.58177e-07	0.942001	0.1	0.041	0.00285936
TRIM44	1.58926e-07	-0.334866	0.115	0.109	0.00287291
TRMT6	1.62099e-07	1.00227	0.08	0.028	0.00293027
SLC39A7	1.62688e-07	-0.242973	0.143	0.131	0.0029409
CHN1	1.63098e-07	-0.463737	0.09	0.076	0.00294833
GNL1	1.63128e-07	0.205938	0.177	0.115	0.00294887
TBL2	1.6391e-07	0.333006	0.122	0.071	0.002963
PPP1R10	1.64158e-07	0.234622	0.208	0.136	0.00296749
CD81	1.68895e-07	0.42482	0.09	0.048	0.00305312
ZMYND19	1.78246e-07	0.701475	0.087	0.04	0.00322216
ALAS1	1.79346e-07	0.219517	0.122	0.074	0.00324203
CBX5	1.79429e-07	-0.21806	0.207	0.185	0.00324354
DNAJC21	1.81645e-07	0.537078	0.1	0.051	0.0032836
SLC11A2	1.82141e-07	0.56476	0.116	0.063	0.00329257
NENF	1.82617e-07	0.275191	0.088	0.048	0.00330117
CLIP2	1.84341e-07	-0.317755	0.139	0.115	0.00333233
NELFB	1.84891e-07	0.346405	0.096	0.054	0.00334227
ACAP2	1.87408e-07	0.335963	0.153	0.102	0.00338778
IP6K2	1.8784e-07	-0.527659	0.148	0.158	0.00339559
PPP1R12A	1.89072e-07	-0.117619	0.133	0.11	0.00341786
CTBP2	1.90403e-07	-0.786565	0.105	0.115	0.00344192
TAF6	1.91503e-07	0.342297	0.143	0.088	0.00346179
CUL2	1.94301e-07	0.256895	0.161	0.1	0.00351238
TMEM42	1.94594e-07	0.483776	0.071	0.033	0.00351768
UBE2O	1.9591e-07	0.166813	0.148	0.097	0.00354147
ATL2	1.97176e-07	0.212098	0.154	0.102	0.00356434
TM7SF2	1.97453e-07	-0.251759	0.126	0.111	0.00356936
RAP1A	1.97544e-07	0.333474	0.111	0.065	0.003571
MBD4	1.99415e-07	0.198582	0.095	0.056	0.00360483
WDR24	2.00435e-07	0.450108	0.111	0.065	0.00362326
NUDCD2	2.007e-07	0.51101	0.147	0.088	0.00362805
UBA6	2.02018e-07	0.195481	0.189	0.131	0.00365187
PPIL4	2.02248e-07	0.469649	0.162	0.088	0.00365604
SF3A2	2.042e-07	-0.310854	0.144	0.138	0.00369132
NT5DC2	2.08903e-07	0.272104	0.216	0.142	0.00377633
NSD2	2.09542e-07	-0.401128	0.106	0.1	0.00378788
PSMA3	2.10507e-07	0.288842	0.098	0.058	0.00380534
ANKLE2	2.10585e-07	0.554443	0.099	0.055	0.00380674
RNASEH1	2.11841e-07	0.447943	0.126	0.069	0.00382944
ZNF483	2.12634e-07	0.207251	0.119	0.073	0.00384378
FARP1	2.1287e-07	-0.371166	0.136	0.134	0.00384806
NARS2	2.13212e-07	0.419332	0.127	0.076	0.00385422
RNF208	2.13901e-07	0.126396	0.09	0.057	0.00386668
ARHGEF2	2.15127e-07	0.401776	0.16	0.107	0.00388885
ELP3	2.16504e-07	0.325312	0.119	0.084	0.00391374
AGRN	2.16583e-07	-0.212272	0.178	0.161	0.00391518
MYNN	2.18734e-07	0.380156	0.144	0.089	0.00395405
SLC41A2	2.20195e-07	0.376285	0.075	0.039	0.00398047
GALT	2.21287e-07	0.181292	0.111	0.07	0.0040002
C11orf1	2.21698e-07	0.768921	0.099	0.05	0.00400763
RPRD1A	2.22916e-07	-0.26861	0.221	0.205	0.00402965
TRAPPC5	2.2296e-07	0.465793	0.157	0.094	0.00403045
SORT1	2.23994e-07	0.515512	0.134	0.068	0.00404914
TNXB	2.2519e-07	0.452993	0.128	0.076	0.00407076
ATP6V0C	2.27809e-07	0.345419	0.216	0.147	0.00411811
LOX	2.27823e-07	0.697828	0.043	0.014	0.00411835
TAF1D	2.28196e-07	0.633204	0.121	0.066	0.0041251
MKS1	2.28929e-07	0.913808	0.087	0.036	0.00413836
AP1G2	2.32331e-07	-0.774284	0.096	0.117	0.00419985
CUX1	2.33428e-07	-0.218271	0.119	0.093	0.00421967
DPYSL4	2.33873e-07	-0.164288	0.225	0.196	0.00422772
RNF14	2.34118e-07	0.449269	0.126	0.068	0.00423216
BCAS3	2.36741e-07	0.965378	0.09	0.041	0.00427956
SEC61A2	2.37813e-07	0.715114	0.112	0.056	0.00429894
LMAN2	2.38779e-07	0.12827	0.147	0.099	0.00431641
TARSL2	2.39904e-07	0.16524	0.074	0.045	0.00433674
RSF1	2.41324e-07	-0.18561	0.127	0.099	0.00436241
HNRNPC	2.42085e-07	-0.358307	0.173	0.169	0.00437617
DCAF12	2.42754e-07	-0.271904	0.083	0.07	0.00438826
H2AFY2	2.45246e-07	-0.495618	0.153	0.169	0.00443331
DPH3	2.46156e-07	0.585776	0.139	0.075	0.00444976
HINT3	2.48381e-07	0.559331	0.112	0.074	0.00448998
MNAT1	2.54214e-07	-0.189604	0.108	0.09	0.00459543
NRBP1	2.57076e-07	-0.115539	0.156	0.13	0.00464717
SMIM10L1	2.5829e-07	0.527043	0.116	0.067	0.0046691
AMN1	2.58347e-07	-0.145166	0.128	0.103	0.00467014
TM2D1	2.58746e-07	0.293906	0.134	0.085	0.00467736
LARP4	2.59475e-07	0.105043	0.203	0.146	0.00469053
UBXN2A	2.62029e-07	0.258175	0.115	0.078	0.0047367
HNRNPH3	2.64343e-07	-0.779278	0.176	0.239	0.00477853
MPPED2	2.67971e-07	0.123982	0.164	0.123	0.00484411
ZNF772	2.72021e-07	0.317971	0.075	0.042	0.00491732
SMIM26	2.72374e-07	0.132494	0.134	0.085	0.0049237
NAP1L4	2.77475e-07	0.160714	0.218	0.158	0.00501592
AKAP11	2.77733e-07	-0.150616	0.173	0.156	0.00502059
RBM25	2.79854e-07	0.1605	0.213	0.164	0.00505892
ABL1	2.82438e-07	0.287441	0.141	0.093	0.00510563
ATF6B	2.83413e-07	0.14884	0.182	0.131	0.00512326
SUMF2	2.83535e-07	0.115654	0.112	0.076	0.00512547
MON1B	2.83785e-07	-0.138785	0.105	0.084	0.00512999
PYCR2	2.8381e-07	0.18673	0.152	0.109	0.00513043
TMEM175	2.8381e-07	0.410415	0.124	0.076	0.00513044
GTPBP1	2.84294e-07	0.124931	0.148	0.096	0.00513919
SEL1L	2.90865e-07	0.250418	0.174	0.123	0.00525798
TRIB3	2.91501e-07	0.245552	0.175	0.118	0.00526946
SPATA18	2.93758e-07	2.60837	0.037	0.005	0.00531026
ATIC	2.9501e-07	0.565622	0.091	0.047	0.00533289
SLC30A6	2.9526e-07	0.166695	0.07	0.042	0.00533741
CCNT2	2.9715e-07	-0.264419	0.122	0.099	0.00537159
MZT1	3.00604e-07	0.60278	0.094	0.047	0.00543401
SLC35E3	3.01226e-07	0.189593	0.107	0.074	0.00544527
SUCLG1	3.01605e-07	0.417001	0.133	0.078	0.00545212
SF3B1	3.03301e-07	0.382651	0.148	0.095	0.00548278
HNRNPK	3.04841e-07	-1.61357	0.05	0.115	0.00551061
CNPY3	3.06764e-07	0.656091	0.119	0.062	0.00554538
PIP4K2B	3.08627e-07	-0.249427	0.176	0.156	0.00557905
CDC37L1	3.09668e-07	0.52942	0.099	0.051	0.00559787
MCMBP	3.12717e-07	0.279527	0.176	0.122	0.00565298
DHPS	3.13246e-07	-0.283637	0.143	0.112	0.00566254
NME7	3.15453e-07	0.274142	0.112	0.071	0.00570244
EMC3	3.19411e-07	0.621905	0.15	0.079	0.005774
HDLBP	3.21099e-07	0.103376	0.129	0.091	0.00580451
CHCHD6	3.27655e-07	0.629544	0.152	0.076	0.00592301
MCTS1	3.32604e-07	0.300148	0.16	0.101	0.00601248
SLC2A1	3.32964e-07	-0.276191	0.196	0.165	0.006019
SLC20A1	3.3461e-07	0.185211	0.161	0.112	0.00604874
ATP5MD	3.35298e-07	0.716588	0.109	0.052	0.00606119
TOM1	3.42211e-07	1.03792	0.095	0.04	0.00618614
ATP13A1	3.42752e-07	0.303715	0.131	0.085	0.00619594
ABHD17B	3.46097e-07	0.700268	0.089	0.046	0.0062564
BNIP2	3.46202e-07	0.418617	0.145	0.087	0.00625829
DHX38	3.46825e-07	0.137211	0.128	0.093	0.00626955
FAM219A	3.48108e-07	0.131109	0.191	0.144	0.00629275
ZNF25	3.5079e-07	0.252169	0.13	0.08	0.00634124
GFM1	3.53419e-07	0.73894	0.157	0.076	0.00638875
COPZ1	3.65066e-07	0.224395	0.15	0.094	0.0065993
YPEL3	3.66486e-07	-0.181611	0.107	0.08	0.00662496
MRNIP	3.6873e-07	0.202839	0.193	0.131	0.00666553
KHDC4	3.69281e-07	0.210893	0.209	0.145	0.00667548
CCT8	3.74546e-07	0.130337	0.139	0.093	0.00677066
GART	3.75775e-07	0.960474	0.127	0.058	0.00679288
C12orf4	3.7871e-07	0.29045	0.094	0.058	0.00684594
SCAMP3	3.81665e-07	0.563126	0.127	0.076	0.00689935
ERCC5	3.83612e-07	0.152262	0.121	0.076	0.00693455
BTAF1	3.84656e-07	-0.111534	0.177	0.154	0.00695343
NISCH	3.85016e-07	-0.122049	0.192	0.16	0.00695994
ASCC2	3.86525e-07	-0.224527	0.082	0.066	0.00698721
PRMT7	3.88489e-07	0.726976	0.069	0.029	0.00702271
NBEA	3.91599e-07	-0.284	0.1	0.086	0.00707894
TNFRSF21	3.93459e-07	-0.413548	0.075	0.066	0.00711256
CDC73	4.01812e-07	-0.127182	0.139	0.113	0.00726355
PPP6R1	4.02296e-07	0.549054	0.136	0.076	0.00727231
TASP1	4.04089e-07	0.400123	0.079	0.042	0.00730472
KIFC1	4.04467e-07	-2.70988	0.006	0.028	0.00731154
RIMS3	4.05655e-07	0.271262	0.144	0.085	0.00733303
ARHGDIG	4.11198e-07	-0.417982	0.124	0.121	0.00743323
HAT1	4.12907e-07	0.726637	0.126	0.063	0.00746412
STX5	4.12948e-07	0.225323	0.101	0.076	0.00746485
LEMD2	4.19418e-07	0.110711	0.147	0.105	0.00758181
NAPB	4.21008e-07	0.250868	0.161	0.093	0.00761056
SYNRG	4.24475e-07	0.429318	0.15	0.095	0.00767323
APH1A	4.32646e-07	-0.160763	0.187	0.159	0.00782093
COX5B	4.33301e-07	0.747114	0.122	0.055	0.00783279
TET2	4.3428e-07	-0.11261	0.162	0.13	0.00785047
CCDC91	4.35691e-07	0.156309	0.095	0.056	0.00787598
TAGLN	4.38252e-07	0.545066	0.078	0.038	0.00792228
CASP3	4.45661e-07	0.309577	0.144	0.087	0.00805621
RFX3	4.46481e-07	-0.186517	0.144	0.116	0.00807105
TSPAN4	4.48351e-07	1.12044	0.12	0.051	0.00810484
TIMM10B	4.48757e-07	0.196661	0.176	0.12	0.00811217
RNF157	4.50377e-07	0.32154	0.188	0.123	0.00814147
ATP6V0A2	4.51254e-07	0.20065	0.134	0.087	0.00815732
ERMARD	4.53451e-07	0.501579	0.107	0.053	0.00819703
ATP5ME	4.59203e-07	0.283405	0.145	0.093	0.00830102
MYO5A	4.60543e-07	0.141074	0.168	0.123	0.00832523
EPB41L1	4.64563e-07	0.155217	0.136	0.093	0.00839791
OSER1	4.67263e-07	0.694232	0.061	0.03	0.00844671
QPRT	4.73935e-07	1.18628	0.087	0.032	0.00856733
RIMBP2	4.76714e-07	1.03034	0.06	0.022	0.00861755
PYURF	4.81012e-07	0.134105	0.175	0.12	0.00869525
DEDD2	4.81148e-07	0.324953	0.109	0.067	0.00869772
DOK4	4.88537e-07	-0.112936	0.121	0.096	0.00883129
ELMSAN1	4.8916e-07	0.679993	0.091	0.041	0.00884255
AGPAT5	5.02584e-07	0.134545	0.194	0.144	0.0090852
TBCD	5.07553e-07	0.349099	0.192	0.129	0.00917504
AKAP6	5.10812e-07	-0.51014	0.136	0.135	0.00923395
PTBP3	5.12418e-07	0.433203	0.168	0.105	0.00926297
SLC33A1	5.12924e-07	0.59521	0.132	0.077	0.00927212
MEGF8	5.14748e-07	-0.19977	0.117	0.095	0.0093051
UBE2B	5.21674e-07	0.123576	0.183	0.139	0.00943031
BFAR	5.25718e-07	0.254373	0.1	0.062	0.00950341
BAG6	5.26071e-07	-0.513928	0.176	0.209	0.00950979
HNRNPF	5.26134e-07	0.268039	0.15	0.105	0.00951093
HDAC6	5.29445e-07	0.33926	0.132	0.081	0.00957078
CTNND2	5.31712e-07	-0.274483	0.155	0.144	0.00961176
TSTA3	5.43891e-07	0.501397	0.111	0.063	0.00983191
VASH2	5.50652e-07	-0.675657	0.081	0.094	0.00995413
GRIA1	5.54069e-07	0.234001	0.187	0.124	0.0100159
DDHD2	5.54158e-07	0.202152	0.153	0.103	0.0100175
ABCF1	5.57259e-07	0.229384	0.132	0.084	0.0100736
TTC23	5.60232e-07	0.988994	0.064	0.022	0.0101273
ANKS1A	5.62289e-07	0.21121	0.11	0.072	0.0101645
SNRPF	5.63578e-07	0.314392	0.146	0.088	0.0101878
TACC2	5.67411e-07	-0.539817	0.076	0.071	0.0102571
PALM	5.69529e-07	-0.191775	0.108	0.092	0.0102954
PHLDB1	5.71619e-07	-0.296408	0.107	0.094	0.0103331
SAFB2	5.75077e-07	0.178486	0.158	0.122	0.0103957
EIF2AK3	5.76531e-07	0.801875	0.117	0.057	0.0104219
GPAT4	5.80099e-07	0.135286	0.063	0.037	0.0104865
GRIK3	5.83915e-07	-0.697251	0.117	0.15	0.0105554
GALNT16	5.86099e-07	0.297226	0.061	0.03	0.0105949
BBS4	5.8916e-07	0.462588	0.134	0.079	0.0106503
ITM2B	5.92227e-07	0.298623	0.167	0.11	0.0107057
ANKRD54	5.97373e-07	0.693123	0.102	0.049	0.0107987
POLR1D	5.97868e-07	0.11635	0.128	0.085	0.0108077
PIP4P1	5.98021e-07	0.57462	0.139	0.082	0.0108104
CCDC130	5.98588e-07	0.537664	0.102	0.056	0.0108207
FAM120A	6.01339e-07	0.206075	0.101	0.063	0.0108704
MAP3K7	6.02874e-07	0.139894	0.143	0.104	0.0108981
PIN1	6.09116e-07	-0.100154	0.144	0.115	0.011011
CACNA2D2	6.16707e-07	0.176604	0.114	0.075	0.0111482
LMO4	6.19539e-07	-0.365819	0.144	0.136	0.0111994
ZNF768	6.20099e-07	0.434501	0.154	0.092	0.0112095
CALR	6.22127e-07	0.181825	0.114	0.071	0.0112462
EIF2A	6.22677e-07	0.161173	0.182	0.128	0.0112561
ACVR2B	6.24806e-07	-0.530691	0.14	0.155	0.0112946
STX7	6.26395e-07	-0.306324	0.145	0.133	0.0113233
TUBGCP2	6.33414e-07	0.28014	0.132	0.082	0.0114502
AGAP3	6.38349e-07	-0.103817	0.096	0.076	0.0115394
MTERF4	6.41972e-07	0.150341	0.13	0.087	0.0116049
DCAF10	6.44541e-07	0.132944	0.119	0.081	0.0116514
CCNH	6.44707e-07	0.750238	0.116	0.062	0.0116544
ZFPL1	6.51997e-07	0.795027	0.08	0.031	0.0117862
DDX39B	6.57245e-07	0.111754	0.122	0.086	0.011881
WRN	6.58534e-07	0.387933	0.11	0.065	0.0119043
SDHA	6.59806e-07	0.375903	0.126	0.076	0.0119273
TSFM	6.59992e-07	0.435927	0.106	0.06	0.0119307
SDHAF4	6.63309e-07	0.244765	0.1	0.062	0.0119906
NKIRAS1	6.63585e-07	0.240464	0.067	0.042	0.0119956
UGGT1	6.67904e-07	0.686776	0.138	0.077	0.0120737
KDM1A	6.68547e-07	-0.672716	0.153	0.18	0.0120853
SLC8A1	6.71228e-07	-0.296439	0.163	0.168	0.0121338
GNG10	6.751e-07	0.606054	0.078	0.036	0.0122038
MPP2	6.75268e-07	0.139218	0.102	0.069	0.0122068
RANBP17	6.81132e-07	0.207579	0.136	0.076	0.0123128
RCN1	6.82302e-07	0.141778	0.153	0.107	0.012334
MROH1	6.83401e-07	0.224526	0.15	0.108	0.0123538
MANBA	7.00861e-07	-0.276469	0.067	0.055	0.0126695
DUSP7	7.03792e-07	0.678931	0.107	0.061	0.0127224
ATP2B4	7.05129e-07	-0.589193	0.089	0.101	0.0127466
PMPCB	7.07409e-07	-0.221763	0.145	0.125	0.0127878
ELOVL4	7.09196e-07	0.40663	0.112	0.067	0.0128201
ARL14EP	7.20138e-07	0.288489	0.157	0.098	0.0130179
GALE	7.40658e-07	0.829112	0.078	0.031	0.0133889
ALDH3A2	7.45971e-07	0.133736	0.101	0.07	0.0134849
RNF31	7.46531e-07	-0.127868	0.105	0.076	0.013495
ABHD18	7.51324e-07	0.688811	0.101	0.051	0.0135817
CENPJ	7.56274e-07	0.636153	0.116	0.061	0.0136712
NUBP2	7.56812e-07	0.201058	0.146	0.103	0.0136809
CACUL1	7.57777e-07	0.47241	0.146	0.089	0.0136983
CNRIP1	7.60021e-07	0.189047	0.121	0.072	0.0137389
FBXO30	7.67983e-07	-0.186619	0.101	0.076	0.0138828
TUT1	7.69911e-07	0.779964	0.115	0.059	0.0139177
ALAD	7.73359e-07	0.766722	0.084	0.034	0.01398
FBXL15	7.86601e-07	0.439921	0.08	0.041	0.0142194
SPOP	7.86975e-07	-0.406707	0.095	0.096	0.0142261
VPS33A	7.9186e-07	0.75509	0.094	0.044	0.0143144
FAM89B	7.96846e-07	-0.367842	0.17	0.161	0.0144046
REV3L	7.97204e-07	0.315015	0.12	0.07	0.0144111
PTN	8.0878e-07	-1.14995	0.101	0.175	0.0146203
PIK3C2A	8.13429e-07	-0.20911	0.103	0.079	0.0147044
TUBGCP5	8.19258e-07	0.622177	0.094	0.05	0.0148097
SIRT2	8.20088e-07	0.25063	0.145	0.101	0.0148247
PLPBP	8.4645e-07	0.215988	0.09	0.052	0.0153013
TRMU	8.5375e-07	-0.324258	0.058	0.045	0.0154332
LARP4B	8.55553e-07	0.244834	0.112	0.07	0.0154658
ZBED8	8.57989e-07	-0.411154	0.089	0.081	0.0155099
MGAT2	8.6258e-07	0.250369	0.088	0.053	0.0155929
TRAPPC1	8.6638e-07	0.160284	0.132	0.093	0.0156615
ASIC1	8.74218e-07	-0.280707	0.103	0.099	0.0158032
PRPF18	8.89092e-07	0.36657	0.129	0.076	0.0160721
ZBTB5	8.89778e-07	0.438284	0.137	0.078	0.0160845
SMARCC2	8.89898e-07	-0.266015	0.178	0.17	0.0160867
REXO1	8.95157e-07	0.686824	0.119	0.064	0.0161818
CDRT4	9.03614e-07	0.472737	0.107	0.059	0.0163346
PRKCI	9.09101e-07	0.200463	0.11	0.073	0.0164338
TRMT44	9.1152e-07	-0.653022	0.047	0.044	0.0164775
SREBF2	9.16439e-07	-0.767321	0.184	0.246	0.0165665
SH3BGRL3	9.19087e-07	0.39856	0.212	0.14	0.0166143
GNB5	9.20774e-07	0.413281	0.116	0.062	0.0166448
SLC4A1AP	9.31067e-07	0.192626	0.121	0.089	0.0168309
FAM117B	9.36185e-07	-0.191453	0.091	0.074	0.0169234
OCIAD2	9.48372e-07	-0.223022	0.114	0.099	0.0171437
RNF19B	9.66511e-07	0.412625	0.106	0.061	0.0174716
SLC35F1	9.73993e-07	-0.419623	0.11	0.105	0.0176069
ZNF655	9.82194e-07	0.202454	0.14	0.096	0.0177551
BAZ2B	9.84118e-07	-0.117949	0.142	0.123	0.0177899
BCAR1	9.94957e-07	0.17121	0.131	0.089	0.0179858
MORN2	1.00042e-06	-0.138067	0.082	0.058	0.0180846
MPHOSPH8	1.00106e-06	-0.495725	0.068	0.062	0.0180962
EPB41L3	1.00193e-06	0.906694	0.091	0.037	0.0181119
ECD	1.00255e-06	0.376053	0.131	0.085	0.018123
FAM200B	1.00811e-06	0.102977	0.112	0.076	0.0182237
FAM221A	1.01369e-06	0.309142	0.065	0.033	0.0183245
CASTOR2	1.01683e-06	-0.273553	0.125	0.111	0.0183813
SCCPDH	1.02344e-06	0.192393	0.15	0.094	0.0185008
ASB3	1.0273e-06	0.171441	0.134	0.092	0.0185705
EDC3	1.03065e-06	0.4906	0.131	0.075	0.018631
UBE4A	1.03096e-06	0.238662	0.142	0.095	0.0186367
CNTROB	1.03324e-06	-0.548463	0.08	0.076	0.0186778
SLC39A3	1.03764e-06	0.304318	0.127	0.082	0.0187574
ATRAID	1.04129e-06	0.26113	0.162	0.11	0.0188235
NEFL	1.04302e-06	0.25954	0.155	0.102	0.0188547
SKI	1.04615e-06	-0.112918	0.138	0.118	0.0189112
P3H4	1.05632e-06	0.541068	0.122	0.069	0.0190951
BAZ1B	1.06334e-06	0.390666	0.191	0.128	0.019222
TMX4	1.08745e-06	0.210303	0.17	0.117	0.0196579
RAMAC	1.09363e-06	0.979878	0.094	0.036	0.0197696
SMIM30	1.09395e-06	0.242053	0.081	0.047	0.0197753
CALCOCO1	1.10272e-06	-0.20393	0.1	0.083	0.0199339
PARL	1.10331e-06	0.604156	0.112	0.059	0.0199445
SPART	1.10686e-06	0.154884	0.123	0.081	0.0200086
PANX1	1.10759e-06	-0.128434	0.121	0.099	0.0200219
PRR14L	1.11301e-06	0.409941	0.111	0.071	0.0201199
CRIP2	1.1175e-06	-0.19649	0.109	0.094	0.020201
COQ9	1.12103e-06	0.284979	0.122	0.076	0.0202649
USP19	1.12219e-06	0.188438	0.134	0.088	0.0202858
POLR2I	1.12358e-06	0.399763	0.183	0.11	0.0203109
UBE2M	1.12416e-06	0.284188	0.169	0.113	0.0203214
IMPAD1	1.12598e-06	-0.221781	0.125	0.114	0.0203543
PELO	1.12598e-06	0.815417	0.077	0.036	0.0203543
TNK2	1.13658e-06	0.384349	0.147	0.096	0.0205459
GTF2A1	1.13862e-06	0.153477	0.132	0.089	0.0205829
ARHGAP33	1.15066e-06	-0.490061	0.104	0.107	0.0208004
SETX	1.15075e-06	0.42398	0.101	0.059	0.020802
COA6	1.15626e-06	0.469892	0.058	0.026	0.0209017
OTUD6B	1.17622e-06	0.930065	0.071	0.031	0.0212625
SPAG16	1.17649e-06	0.372157	0.138	0.089	0.0212673
SUPT20H	1.18043e-06	0.260713	0.148	0.095	0.0213387
WDR54	1.18078e-06	0.702037	0.107	0.057	0.021345
ZNF331	1.18113e-06	0.951697	0.11	0.05	0.0213514
ZNF316	1.19484e-06	0.243183	0.177	0.123	0.0215991
LZIC	1.19507e-06	0.143229	0.145	0.105	0.0216032
GNPAT	1.19632e-06	-0.184562	0.106	0.08	0.0216259
SAT2	1.21647e-06	-0.362012	0.121	0.116	0.0219902
PSMD9	1.22148e-06	0.400729	0.106	0.063	0.0220808
ABRACL	1.22822e-06	0.130438	0.117	0.077	0.0222026
ASCC1	1.23471e-06	-0.263631	0.104	0.085	0.0223199
MINDY3	1.23473e-06	-0.24009	0.108	0.083	0.0223202
SNAPC5	1.24373e-06	0.895999	0.07	0.028	0.0224829
ASCC3	1.24667e-06	0.482387	0.13	0.078	0.0225361
ERFL	1.248e-06	1.02949	0.066	0.025	0.0225601
GNAQ	1.27969e-06	-0.279598	0.172	0.169	0.023133
TGOLN2	1.29234e-06	0.37169	0.12	0.073	0.0233616
CCDC136	1.30456e-06	-0.202449	0.123	0.105	0.0235825
NKX2-1	1.30951e-06	-1.2991	0.043	0.085	0.023672
SH3GL1	1.31266e-06	0.124611	0.102	0.078	0.023729
TRIM52	1.31921e-06	0.306685	0.072	0.044	0.0238473
CTNNA2	1.32835e-06	-0.675266	0.079	0.092	0.0240127
TOP1	1.33599e-06	-0.351075	0.149	0.143	0.0241506
NFASC	1.34557e-06	-0.337091	0.112	0.103	0.0243239
UBC	1.35825e-06	0.248499	0.171	0.129	0.0245531
FAM49B	1.36388e-06	0.492505	0.122	0.07	0.0246548
FKBP3	1.37281e-06	-0.222588	0.09	0.072	0.0248163
PAPSS1	1.37583e-06	-0.344382	0.124	0.122	0.0248708
TMEM70	1.37906e-06	0.886444	0.094	0.044	0.0249292
RNF216	1.39175e-06	0.272117	0.092	0.058	0.0251587
SSBP2	1.39565e-06	-0.516626	0.093	0.098	0.0252292
DLX6	1.40095e-06	0.242993	0.076	0.045	0.0253251
GNPDA1	1.41027e-06	1.03498	0.07	0.025	0.0254934
RBM28	1.4108e-06	0.770716	0.061	0.029	0.025503
NUDT16	1.42454e-06	0.416951	0.1	0.057	0.0257515
2024-03-05	1.42778e-06	-0.282308	0.134	0.123	0.02581
DLX5	1.42798e-06	-0.38638	0.096	0.094	0.0258136
EEF1AKMT4	1.42818e-06	0.871129	0.066	0.031	0.0258173
TMEM189	1.43443e-06	0.211498	0.101	0.06	0.0259302
AP1AR	1.43523e-06	-0.156218	0.102	0.079	0.0259446
PDXP	1.4375e-06	0.233272	0.136	0.092	0.0259857
TUBG2	1.44125e-06	0.439963	0.102	0.055	0.0260534
ATP13A3	1.46556e-06	-0.169742	0.111	0.085	0.0264928
MSI1	1.48205e-06	-0.997316	0.09	0.142	0.0267911
WASF1	1.4891e-06	-0.433589	0.129	0.133	0.0269184
CHCHD7	1.49757e-06	0.448766	0.099	0.048	0.0270716
EEF1AKMT2	1.50063e-06	0.187108	0.152	0.11	0.027127
GNA13	1.5008e-06	0.242133	0.12	0.068	0.0271299
IRGQ	1.50319e-06	-0.309761	0.167	0.164	0.0271731
BCL11A	1.50482e-06	-0.36466	0.167	0.175	0.0272027
SKIL	1.50995e-06	-0.185524	0.123	0.092	0.0272954
P4HTM	1.5119e-06	0.139463	0.15	0.108	0.0273306
RAB2B	1.52393e-06	-0.289663	0.125	0.11	0.0275481
POLR3H	1.53494e-06	0.348854	0.12	0.071	0.0277471
ZNF423	1.53679e-06	-0.825605	0.083	0.098	0.0277806
ABCF3	1.54576e-06	0.437975	0.091	0.052	0.0279427
TSTD1	1.55492e-06	1.49792	0.048	0.012	0.0281083
MTPN	1.55531e-06	0.115902	0.1	0.074	0.0281153
ATP8B2	1.55873e-06	0.381333	0.096	0.054	0.0281772
ADK	1.56097e-06	0.320223	0.135	0.091	0.0282177
ELAC2	1.56478e-06	0.151641	0.117	0.083	0.0282865
OSTM1	1.57629e-06	0.529287	0.143	0.083	0.0284946
RPP21	1.59644e-06	0.163406	0.163	0.117	0.0288589
PET100	1.60703e-06	0.517857	0.117	0.063	0.0290503
FNBP1	1.62013e-06	0.366553	0.124	0.075	0.0292871
GPR85	1.62091e-06	-0.331473	0.108	0.092	0.0293012
RAPGEF1	1.62449e-06	0.265781	0.107	0.068	0.0293659
[truncated: 112 more rows]

## Sheet: HD_ UP_GO-BP_WT-VS-HET MigMGE
ID	Description	GeneRatio	BgRatio	RichFactor	FoldEnrichment	zScore	pvalue	p.adjust	qvalue	geneID	Count
GO:0034976	response to endoplasmic reticulum stress	56/1119	269/18888	0.208178	3.51392	10.4211	8.6486e-17	4.30009e-13	3.84453e-13	HM13/DDIT3/TNFRSF10B/P4HB/DNAJC3/XBP1/UFM1/CANX/TMCO1/SEC61B/ERO1A/HERPUD1/GORASP2/SERP1/DNAJB9/SGTA/SESN2/CLGN/CCDC47/DDRGK1/BBC3/TMEM33/SELENOS/CLU/CREB3/EDEM3/HSPA5/HYOU1/EIF2AK3/HSP90B1/FAM8A1/BAX/SELENOK/PPP1R15B/CEBPB/QRICH1/EIF2AK4/USP14/SERINC3/PARP6/EIF2S1/NR1H3/BFAR/NGLY1/HSPA1A/EDEM1/APAF1/SEL1L/SVIP/EDEM2/NCK1/TBL2/RCN3/DERL3/AMFR/ERLEC1	56
GO:0048193	Golgi vesicle transport	57/1119	294/18888	0.193878	3.27253	9.85511	1.31544e-15	3.27018e-12	2.92374e-12	ARF4/SEC31A/P4HB/SEC24A/KDELR2/VAMP2/COPB2/GOLT1B/NAPA/SCAMP3/RER1/COPB1/COG3/SEC22A/ARCN1/BET1L/YIF1A/YKT6/TMED7/GOLGA2/TMED3/SEC24C/GOSR2/PREPL/AP3D1/SEC23A/SEC13/AP2A1/SEC24D/HYOU1/ARFGAP3/IER3IP1/SEC23B/COPG1/RAB14/STX5/RAB6A/YIPF5/TRAPPC4/SAR1B/COPA/RAB33B/COG1/YIPF4/COG5/WIPI1/YIF1B/TRAPPC3/TRAPPC11/NAPG/SEC22B/USO1/BLZF1/GOLGA5/ATP9B/RINT1/GCC2	57
GO:0006888	endoplasmic reticulum to Golgi vesicle-mediated transport	36/1119	132/18888	0.272727	4.60346	10.4256	4.63148e-15	7.6759e-12	6.86271e-12	ARF4/SEC31A/P4HB/SEC24A/KDELR2/COPB2/GOLT1B/COPB1/COG3/SEC22A/ARCN1/YIF1A/YKT6/TMED7/GOLGA2/TMED3/SEC24C/SEC23A/SEC13/SEC24D/HYOU1/IER3IP1/SEC23B/COPG1/STX5/YIPF5/TRAPPC4/SAR1B/COPA/YIPF4/YIF1B/TRAPPC3/TRAPPC11/SEC22B/USO1/RINT1	36
GO:0006986	response to unfolded protein	34/1119	138/18888	0.246377	4.15868	9.34566	6.63767e-13	8.25062e-10	7.37655e-10	DDIT3/DNAJC3/XBP1/ERO1A/HERPUD1/SERP1/DNAJB9/DDRGK1/TMEM33/SELENOS/HSPD1/CREB3/EDEM3/HSPA5/EIF2AK3/BAX/PPP1R15B/QRICH1/PARP6/EIF2S1/BFAR/HSP90AB1/HSPA1A/EDEM1/DNAJB4/HSPH1/EDEM2/BAG3/NCK1/TBL2/TRAM1/DERL3/AMFR/ERLEC1	34
GO:0034470	ncRNA processing	66/1119	433/18888	0.152425	2.57283	8.30874	1.26453e-12	1.25745e-09	1.12424e-09	TRMT112/RRP12/ELP4/FAM98A/ELP2/PES1/USP36/RIOK3/BUD23/TSN/EBNA1BP2/DDX51/TUT1/NOC4L/DDX18/INTS8/NHP2/UTP6/NOP58/IMP4/DIS3/RTRAF/PPAN/MPHOSPH10/DALRD3/THUMPD3/WDR43/PARN/EMG1/SART1/INTS10/GTF2H5/CTU2/NOLC1/PELP1/WDR74/DDX21/NCBP2/SRRT/PIWIL2/EXOSC7/TSNAX/WDR75/ELP1/GON7/EIF4A3/GTPBP4/RPF2/EXOSC5/NUDT16/DDX49/TRMT1L/INTS4/NSA2/RIOK2/DPH3/TUT4/URB1/RNF113A/UTP25/TRMT2A/PUSL1/TUT7/WDR3/ELP3/TRMT10A	66
GO:0035966	response to topologically incorrect protein	35/1119	152/18888	0.230263	3.88669	8.96704	2.53982e-12	2.10467e-09	1.8817e-09	DDIT3/DNAJC3/XBP1/ERO1A/HERPUD1/SERP1/DNAJB9/DDRGK1/TMEM33/SELENOS/HSPD1/CLU/CREB3/EDEM3/HSPA5/EIF2AK3/BAX/PPP1R15B/QRICH1/PARP6/EIF2S1/BFAR/HSP90AB1/HSPA1A/EDEM1/DNAJB4/HSPH1/EDEM2/BAG3/NCK1/TBL2/TRAM1/DERL3/AMFR/ERLEC1	35
GO:0034620	cellular response to unfolded protein	26/1119	90/18888	0.288889	4.87626	9.25003	6.88715e-12	4.89185e-09	4.3736e-09	DDIT3/XBP1/ERO1A/HERPUD1/SERP1/DNAJB9/DDRGK1/TMEM33/SELENOS/HSPD1/CREB3/HSPA5/EIF2AK3/BAX/PPP1R15B/QRICH1/PARP6/EIF2S1/BFAR/HSPA1A/BAG3/NCK1/TBL2/DERL3/AMFR/ERLEC1	26
GO:0022613	ribonucleoprotein complex biogenesis	70/1119	499/18888	0.140281	2.36785	7.77094	1.40185e-11	8.71248e-09	7.78948e-09	TRMT112/NUDT21/RRP12/GNL2/LSM4/PES1/MYBBP1A/USP36/RIOK3/BUD23/PAK1IP1/EBNA1BP2/DDX51/NOC4L/DDX18/NHP2/XAB2/UTP6/NOP58/IMP4/LSG1/DIS3/PPAN/MPHOSPH10/EIF3J/DDX42/WDR43/EMG1/EIF3B/KHDC4/SF3A3/SART1/GTF2H5/NOLC1/PELP1/WDR74/DDX21/HSP90AB1/EIF3L/SNRPD2/SF3B2/EXOSC7/WDR75/ISG20L2/EIF5B/PRPF19/EIF3M/EIF4A3/SNRPA1/GTPBP4/RPF2/EXOSC5/NUDT16/DDX49/MPV17L2/RUVBL1/SF3B5/NSA2/RIOK2/TSSC4/ATM/FASTKD2/SFSWAP/UR…	70
GO:0030968	endoplasmic reticulum unfolded protein response	23/1119	76/18888	0.302632	5.10823	9.00552	3.92034e-11	2.16577e-08	1.93633e-08	DDIT3/XBP1/ERO1A/HERPUD1/SERP1/DNAJB9/DDRGK1/TMEM33/SELENOS/CREB3/HSPA5/EIF2AK3/BAX/PPP1R15B/QRICH1/PARP6/EIF2S1/BFAR/NCK1/TBL2/DERL3/AMFR/ERLEC1	23
GO:0072594	establishment of protein localization to organelle	64/1119	454/18888	0.140969	2.37947	7.46612	8.71995e-11	4.33556e-08	3.87625e-08	HK2/USP9X/DDIT3/CDKN1A/BNIP3L/SEC61A1/UFM1/SEC61B/HK1/SEC63/HERPUD1/VPS53/SGTA/NUP58/SPCS1/SRPRB/NABP2/USP36/SRPRA/TOMM40/AP3D1/TOMM7/HSPD1/CLU/SEC13/TOMM5/TXNIP/M6PR/HSPA5/SRP54/MTCH1/TOMM70/SEC61G/PAM16/BAX/TOMM20/CRY2/STAM2/TIMM21/TCP1/TIMM8B/HAX1/APPL1/TIMM10B/SEC61A2/PEX2/TNPO3/ATG13/KPNA5/TOMM6/SGTB/ZFAND2A/EDEM1/IPO11/PITRM1/PXK/RAB3GAP2/BAG3/AP3B1/IMMP1L/JAK2/TRAM1/CCT6A/GCC2	64
GO:0035967	cellular response to topologically incorrect protein	26/1119	102/18888	0.254902	4.30258	8.3927	1.50908e-10	6.82105e-08	6.09842e-08	DDIT3/XBP1/ERO1A/HERPUD1/SERP1/DNAJB9/DDRGK1/TMEM33/SELENOS/HSPD1/CREB3/HSPA5/EIF2AK3/BAX/PPP1R15B/QRICH1/PARP6/EIF2S1/BFAR/HSPA1A/BAG3/NCK1/TBL2/DERL3/AMFR/ERLEC1	26
GO:1903573	negative regulation of response to endoplasmic reticulum stress	17/1119	45/18888	0.377778	6.37665	9.06166	2.74859e-10	1.13883e-07	1.01818e-07	XBP1/HERPUD1/DNAJB9/SGTA/DDRGK1/SELENOS/CLU/CREB3/HSPA5/HYOU1/PPP1R15B/USP14/NR1H3/BFAR/HSPA1A/SVIP/NCK1	17
GO:0006457	protein folding	39/1119	225/18888	0.173333	2.92576	7.29234	1.31398e-09	5.02546e-07	4.49306e-07	P4HB/DNAJC3/TRAP1/CANX/ERO1A/PFDN2/PRDX4/DNAJC25/CLGN/PPIL3/CCDC47/CRYAB/HSPD1/HSPA9/CLU/HSPA13/DNAJC21/HSPA5/MOGS/HYOU1/BAG5/HSP90B1/PPIE/DNAJA3/AHSA1/SELENOF/NUDC/FKBP11/TCP1/HSP90AB1/NGLY1/HSPA1A/CRTAP/DNAJB4/HSPH1/FKBP10/BAG3/POFUT2/CCT6A	39
GO:0016072	rRNA metabolic process	43/1119	266/18888	0.161654	2.72862	7.12511	1.77457e-09	6.13248e-07	5.4828e-07	TRMT112/RRP12/DEDD2/PES1/ZCCHC7/USP36/RIOK3/BUD23/EBNA1BP2/DDX51/NOC4L/DDX18/NHP2/UTP6/NOP58/IMP4/DIS3/PPAN/MPHOSPH10/WDR43/EMG1/SART1/GTF2H5/NOLC1/PELP1/WDR74/DDX21/EXOSC7/WDR75/EIF4A3/GTPBP4/RPF2/EXOSC5/NUDT16/MTOR/POLR1B/NCL/DDX49/NSA2/RIOK2/URB1/UTP25/WDR3	43
GO:0072599	establishment of protein localization to endoplasmic reticulum	17/1119	50/18888	0.34	5.73898	8.42011	1.8501e-09	6.13248e-07	5.4828e-07	SEC61A1/SEC61B/SEC63/HERPUD1/SGTA/SPCS1/SRPRB/SRPRA/HSPA5/SRP54/SEC61G/SEC61A2/SGTB/ZFAND2A/EDEM1/RAB3GAP2/TRAM1	17
GO:0006891	intra-Golgi vesicle-mediated transport	14/1119	34/18888	0.411765	6.95032	8.71452	2.75577e-09	8.56354e-07	7.65632e-07	COPB2/NAPA/COPB1/COG3/GOSR2/COPG1/RAB6A/COPA/RAB33B/COG1/COG5/TRAPPC3/NAPG/GOLGA5	14
GO:0045047	protein targeting to ER	16/1119	46/18888	0.347826	5.87108	8.30053	3.79499e-09	1.03963e-06	9.2949e-07	SEC61A1/SEC61B/SEC63/HERPUD1/SGTA/SPCS1/SRPRB/SRPRA/HSPA5/SRP54/SEC61G/SEC61A2/SGTB/ZFAND2A/EDEM1/TRAM1	16
GO:0070972	protein localization to endoplasmic reticulum	21/1119	79/18888	0.265823	4.48692	7.79359	3.84006e-09	1.03963e-06	9.2949e-07	SEC61A1/KDELR2/SEC61B/SEC63/RER1/HERPUD1/SGTA/SPCS1/SRPRB/SRPRA/DDRGK1/HSPA5/SRP54/SEC61G/SEC61A2/SGTB/ZFAND2A/EDEM1/RAB3GAP2/INSIG2/TRAM1	21
GO:0006364	rRNA processing	38/1119	224/18888	0.169643	2.86346	7.04056	3.97284e-09	1.03963e-06	9.2949e-07	TRMT112/RRP12/PES1/USP36/RIOK3/BUD23/EBNA1BP2/DDX51/NOC4L/DDX18/NHP2/UTP6/NOP58/IMP4/DIS3/PPAN/MPHOSPH10/WDR43/EMG1/SART1/GTF2H5/NOLC1/PELP1/WDR74/DDX21/EXOSC7/WDR75/EIF4A3/GTPBP4/RPF2/EXOSC5/NUDT16/DDX49/NSA2/RIOK2/URB1/UTP25/WDR3	38
GO:0042254	ribosome biogenesis	47/1119	319/18888	0.147335	2.48693	6.72134	6.93165e-09	1.72321e-06	1.54065e-06	TRMT112/RRP12/GNL2/PES1/MYBBP1A/USP36/RIOK3/BUD23/PAK1IP1/EBNA1BP2/DDX51/NOC4L/DDX18/NHP2/UTP6/NOP58/IMP4/LSG1/DIS3/PPAN/MPHOSPH10/WDR43/EMG1/SART1/GTF2H5/NOLC1/PELP1/WDR74/DDX21/EXOSC7/WDR75/ISG20L2/EIF5B/EIF4A3/GTPBP4/RPF2/EXOSC5/NUDT16/DDX49/MPV17L2/NSA2/RIOK2/FASTKD2/URB1/UTP25/DNTTIP2/WDR3	47
GO:0005996	monosaccharide metabolic process	40/1119	252/18888	0.15873	2.67926	6.73454	1.11022e-08	2.62857e-06	2.3501e-06	HK2/TSTD1/SLC2A1/ENO1/ENO2/PFKFB3/FUCA1/PDK3/HK1/SERP1/SESN2/PRKACA/PKM/PFKP/MDH1/SELENOS/GNB3/PFKFB4/FOXK1/LCMT1/SLC2A3/PGP/ADIPOR1/CRY1/SDHAF3/GPI/FUT5/GOT1/DDB1/PPP4R3B/ADPGK/AKR1A1/IRS2/WDTC1/POFUT2/PHKG2/GALK2/MDH2/DLAT/ERRFI1	40
GO:1905897	regulation of response to endoplasmic reticulum stress	21/1119	84/18888	0.25	4.21984	7.42188	1.26943e-08	2.86892e-06	2.56499e-06	XBP1/HERPUD1/DNAJB9/SGTA/DDRGK1/TMEM33/SELENOS/CLU/CREB3/HSPA5/HYOU1/EIF2AK3/BAX/PPP1R15B/USP14/SERINC3/NR1H3/BFAR/HSPA1A/SVIP/NCK1	21
GO:0006413	translational initiation	26/1119	124/18888	0.209677	3.53922	7.11891	1.34407e-08	2.90553e-06	2.59772e-06	DNAJC3/EIF1/ZNF598/EIF2AK3/SLBP/EIF3J/EIF1B/EIF2B1/EIF4H/EIF3B/EIF2AK4/EIF2B2/NCBP2/EIF2S1/EIF3L/PAIP2B/EIF4EBP1/EIF5B/KHDRBS1/EIF1AD/EIF3M/EIF4G3/MTOR/NCK1/EIF4B/EIF3D	26
GO:0006605	protein targeting	47/1119	327/18888	0.143731	2.42608	6.52805	1.53591e-08	3.1819e-06	2.84481e-06	CIB1/BNIP3L/SEC61A1/SEC61B/SEC63/HERPUD1/VPS53/SGTA/SPCS1/SRPRB/USP36/SRPRA/TOMM40/AP3D1/TOMM7/HSPD1/CLU/TOMM5/M6PR/HSPA5/SRP54/MTCH1/TOMM70/SEC61G/PAM16/TOMM20/TIMM21/TIMM8B/HAX1/TIMM10B/SEC61A2/ATG13/TOMM6/SGTB/ZFAND2A/EDEM1/AP4B1/PITRM1/PRNP/YIF1B/PXK/GABARAP/AP3B1/IMMP1L/TRAM1/HPCA/GCC2	47
GO:0070059	intrinsic apoptotic signaling pathway in response to endoplasmic reticulum stress	18/1119	65/18888	0.276923	4.67428	7.44646	2.46358e-08	4.89957e-06	4.38051e-06	DDIT3/TNFRSF10B/XBP1/ERO1A/HERPUD1/BBC3/SELENOS/CREB3/HYOU1/EIF2AK3/BAX/SELENOK/CEBPB/QRICH1/SERINC3/HSPA1A/APAF1/NCK1	18
GO:0019318	hexose metabolic process	37/1119	232/18888	0.159483	2.69197	6.50716	3.45021e-08	6.37827e-06	5.70255e-06	HK2/TSTD1/ENO1/ENO2/PFKFB3/FUCA1/PDK3/HK1/SERP1/SESN2/PRKACA/PKM/PFKP/MDH1/SELENOS/GNB3/PFKFB4/FOXK1/LCMT1/PGP/ADIPOR1/CRY1/SDHAF3/GPI/FUT5/GOT1/DDB1/PPP4R3B/ADPGK/IRS2/WDTC1/POFUT2/PHKG2/GALK2/MDH2/DLAT/ERRFI1	37
GO:0007030	Golgi organization	29/1119	156/18888	0.185897	3.13783	6.72834	3.46366e-08	6.37827e-06	5.70255e-06	ARL1/GORASP2/COG3/TMED7/GOLGA2/TMED3/SURF4/BAG5/PI4K2A/VMP1/STX5/MAP2K1/DYM/YIPF5/RAB33B/COG1/YIPF4/COG5/ATL2/LYSMD3/RAB2A/VPS13B/TRAPPC11/SEC22B/USO1/BLZF1/GOLGA5/FBXW8/GCC2	29
GO:0036503	ERAD pathway	24/1119	113/18888	0.212389	3.585	6.91631	3.71204e-08	6.59153e-06	5.89322e-06	HM13/XBP1/CANX/SEC61B/HERPUD1/DNAJB9/SGTA/CLGN/CCDC47/SELENOS/EDEM3/HSPA5/HSP90B1/FAM8A1/USP14/NGLY1/EDEM1/SEL1L/SVIP/EDEM2/RCN3/DERL3/AMFR/ERLEC1	24
GO:0007006	mitochondrial membrane organization	24/1119	117/18888	0.205128	3.46243	6.70469	7.50437e-08	1.28661e-05	1.15031e-05	HK2/BNIP3L/TOMM40/TOMM7/SPG7/HSPA9/TOMM5/GHITM/TMEM11/MTCH1/TOMM70/SLC35F6/BAX/TOMM20/TIMM8B/TIMM10B/TMEM14A/TOMM6/HSPA1A/VDAC2/APOO/AP3B1/CHCHD6/IMMT	24
GO:0009141	nucleoside triphosphate metabolic process	39/1119	266/18888	0.146617	2.47479	6.07888	1.50399e-07	2.49261e-05	2.22854e-05	HK2/DDIT4/ENO1/ENO2/HK1/DGUOK/PRKACA/IMPDH2/PKM/PFKP/ATP5F1B/NDUFV3/NME7/NDUFA2/ADK/ATP5MC1/FOXK1/NDUFA1/COL6A1/NDUFAB1/ENTPD7/ATP5ME/CTPS2/ATP1B1/MLXIPL/RRM2B/GPI/TBPL1/PID1/NDUFS1/HSPA1A/NDUFV2/ADPGK/NDUFA6/RPTOR/NUDT16/NME2/MTOR/NDUFA10	39
GO:0090150	establishment of protein localization to membrane	40/1119	277/18888	0.144404	2.43745	6.04802	1.58301e-07	2.53894e-05	2.26997e-05	CIB1/SEC61A1/VAMP2/TMCO1/SEC61B/SEC63/GORASP2/SGTA/SRPRB/SRPRA/CCDC47/TOMM40/PREPL/TOMM7/TOMM5/CAMLG/HSPA5/SRP54/MTCH1/TOMM70/SEC61G/ATAD1/BAX/TOMM20/TIMM8B/TIMM10B/SEC61A2/ATP1B1/TOMM6/EMC6/SGTB/PRNP/STX3/YIF1B/RAB3GAP2/AP3B1/BLZF1/EMC3/TRAM1/HPCA	40
GO:0071806	protein transmembrane transport	17/1119	66/18888	0.257576	4.34771	6.83679	1.91818e-07	2.98037e-05	2.66463e-05	USP9X/SEC61A1/SEC61B/SEC63/TOMM40/TOMM7/HSPD1/HSPA5/SRP54/TOMM70/SEC61G/PAM16/TOMM20/TIMM21/SEC61A2/PEX2/TRAM1	17
GO:0016050	vesicle organization	48/1119	371/18888	0.12938	2.18385	5.77915	2.89577e-07	4.3612e-05	3.89917e-05	SEC31A/AP1S2/TMF1/SEC24A/VAMP2/APOE/ATP6AP2/CHMP2A/SEC24C/GOSR2/PTPRN/ABCB6/AP3D1/ANXA2/SEC23A/SEC13/ATP6V0B/SYT4/SEC24D/UNC13A/ARFGAP3/PI4K2A/SEC23B/RAB14/STX5/PDCD6IP/STAM2/YIPF5/TRAPPC4/TOM1/SAR1B/CHMP2B/RAB3A/YIPF4/LAPTM4B/TBPL1/VPS13B/STX3/TRAPPC3/TRAPPC11/SEC22B/AP3B1/USO1/ATP6V0A1/SYT9/OSBP/CHMP5/RAB27A	48
GO:0009267	cellular response to starvation	29/1119	172/18888	0.168605	2.84594	6.10295	3.09714e-07	4.3612e-05	3.89917e-05	MAP1LC3B/MFSD2A/CDKN1A/SLC2A1/XBP1/SFRP1/WDR45B/SESN1/NPRL2/SESN2/MYBBP1A/TFEB/RNF167/WRN/HSPA5/EIF2AK3/FADS1/EIF2AK4/EIF2S1/SLC7A5/FBXO22/WIPI1/CLEC16A/RPTOR/MTOR/JMY/GABARAP/TBL2/UPP1	29
GO:0006839	mitochondrial transport	30/1119	182/18888	0.164835	2.78231	6.06309	3.23118e-07	4.3612e-05	3.89917e-05	HK2/BNIP3L/MPC1/TOMM40/TOMM7/SPG7/HSPD1/TOMM5/GHITM/MTCH1/SLC25A26/TOMM70/SLC25A32/PAM16/SLC35F6/BAX/VDAC1/TOMM20/TIMM21/TMEM14C/COL6A1/TIMM8B/TIMM10B/TMEM14A/TOMM6/MRS2/HSPA1A/VDAC2/SFXN1/SLC25A16	30
GO:0006984	ER-nucleus signaling pathway	14/1119	47/18888	0.297872	5.02789	6.93809	3.27262e-07	4.3612e-05	3.89917e-05	DDIT3/XBP1/TMCO1/CCDC47/TMEM33/SELENOS/HSPA5/EIF2AK3/PPP1R15B/QRICH1/EIF2S1/INSIG2/NCK1/AMFR	14
GO:0006006	glucose metabolic process	31/1119	192/18888	0.161458	2.72531	6.02989	3.31484e-07	4.3612e-05	3.89917e-05	HK2/TSTD1/ENO1/ENO2/PDK3/HK1/SERP1/SESN2/PRKACA/PKM/PFKP/MDH1/SELENOS/GNB3/FOXK1/LCMT1/PGP/ADIPOR1/CRY1/SDHAF3/GPI/GOT1/DDB1/PPP4R3B/ADPGK/IRS2/WDTC1/PHKG2/MDH2/DLAT/ERRFI1	31
GO:0042594	response to starvation	33/1119	212/18888	0.15566	2.62745	5.97995	3.3456e-07	4.3612e-05	3.89917e-05	MAP1LC3B/DDIT3/MFSD2A/CDKN1A/SLC2A1/XBP1/SFRP1/WDR45B/SESN1/NPRL2/SESN2/MYBBP1A/TFEB/RNF167/WRN/HSPA5/EIF2AK3/FOXK1/FADS1/EIF2AK4/PEX2/EIF2S1/SLC7A5/FBXO22/WIPI1/CLEC16A/RPTOR/MTOR/JMY/GABARAP/TBL2/LRP11/UPP1	33
GO:0006446	regulation of translational initiation	19/1119	84/18888	0.22619	3.81795	6.4955	3.42089e-07	4.3612e-05	3.89917e-05	DNAJC3/EIF1/ZNF598/EIF2AK3/EIF1B/EIF4H/EIF3B/EIF2AK4/EIF2B2/NCBP2/EIF2S1/PAIP2B/EIF4EBP1/EIF5B/KHDRBS1/EIF4G3/MTOR/NCK1/EIF4B	19
GO:0030970	retrograde protein transport, ER to cytosol	11/1119	29/18888	0.37931	6.40251	7.30635	3.86382e-07	4.68559e-05	4.18919e-05	HM13/SEC61B/HERPUD1/SELENOS/HSP90B1/EDEM1/SEL1L/SVIP/EDEM2/DERL3/ERLEC1	11
GO:1903513	endoplasmic reticulum to cytosol transport	11/1119	29/18888	0.37931	6.40251	7.30635	3.86382e-07	4.68559e-05	4.18919e-05	HM13/SEC61B/HERPUD1/SELENOS/HSP90B1/EDEM1/SEL1L/SVIP/EDEM2/DERL3/ERLEC1	11
GO:0072655	establishment of protein localization to mitochondrion	23/1119	120/18888	0.191667	3.23521	6.16403	5.04084e-07	5.96739e-05	5.3352e-05	HK2/DDIT3/BNIP3L/HK1/USP36/TOMM40/TOMM7/HSPD1/TOMM5/MTCH1/TOMM70/PAM16/BAX/TOMM20/TIMM21/TIMM8B/HAX1/TIMM10B/ATG13/TOMM6/PITRM1/AP3B1/IMMP1L	23
GO:0032527	protein exit from endoplasmic reticulum	14/1119	49/18888	0.285714	4.82267	6.72359	5.78601e-07	6.69024e-05	5.98147e-05	HM13/SEC61B/HERPUD1/SELENOS/SEC13/HSP90B1/SAR1B/EDEM1/SEL1L/SVIP/EDEM2/DERL3/ERLEC1/GCC2	14
GO:0006620	post-translational protein targeting to endoplasmic reticulum membrane	8/1119	15/18888	0.533333	9.00232	7.78048	6.55325e-07	7.40517e-05	6.62066e-05	SEC61A1/SEC61B/SEC63/SGTA/HSPA5/SEC61G/SEC61A2/SGTB	8
GO:0006983	ER overload response	7/1119	11/18888	0.636364	10.7414	8.10992	6.72271e-07	7.42784e-05	6.64093e-05	DDIT3/TMCO1/CCDC47/SELENOS/HSPA5/EIF2AK3/PPP1R15B	7
GO:0009144	purine nucleoside triphosphate metabolic process	36/1119	250/18888	0.144	2.43063	5.71429	6.98973e-07	7.55499e-05	6.75461e-05	HK2/DDIT4/ENO1/ENO2/HK1/DGUOK/PRKACA/IMPDH2/PKM/PFKP/ATP5F1B/NDUFV3/NME7/NDUFA2/ADK/ATP5MC1/FOXK1/NDUFA1/COL6A1/NDUFAB1/ENTPD7/ATP5ME/ATP1B1/MLXIPL/GPI/PID1/NDUFS1/HSPA1A/NDUFV2/ADPGK/NDUFA6/RPTOR/NUDT16/NME2/MTOR/NDUFA10	36
GO:0015980	energy derivation by oxidation of organic compounds	44/1119	338/18888	0.130178	2.19731	5.5739	7.59257e-07	8.03197e-05	7.18106e-05	GFPT1/TRAP1/NDUFA4/PPP1R3C/DGUOK/COX7A2L/COQ10B/MYBBP1A/MDH1/SELENOS/ATP5F1B/NDUFV3/SURF1/GHITM/GBE1/NDUFA2/IFNAR1/NDUFA1/COX7A2/COL6A1/NDUFAB1/UQCR11/COX6A1/ETFB/UQCRQ/ATP5ME/CYCS/ISCU/MLXIPL/PID1/NDUFS1/NDUFV2/NDUFA6/MTOR/IRS2/COQ9/NDUFA10/SHMT2/FH/PPP1CB/PHKG2/IDH2/MDH2/DLAT	44
GO:0045333	cellular respiration	35/1119	245/18888	0.142857	2.41134	5.57983	1.20075e-06	0.000124378	0.000111201	TRAP1/NDUFA4/DGUOK/COX7A2L/COQ10B/MYBBP1A/MDH1/ATP5F1B/NDUFV3/SURF1/GHITM/NDUFA2/IFNAR1/NDUFA1/COX7A2/COL6A1/NDUFAB1/UQCR11/COX6A1/ETFB/UQCRQ/ATP5ME/CYCS/ISCU/MLXIPL/NDUFS1/NDUFV2/NDUFA6/COQ9/NDUFA10/SHMT2/FH/IDH2/MDH2/DLAT	35
GO:0070585	protein localization to mitochondrion	23/1119	127/18888	0.181102	3.05689	5.83647	1.42462e-06	0.000144555	0.000129241	HK2/DDIT3/BNIP3L/HK1/USP36/TOMM40/TOMM7/HSPD1/TOMM5/MTCH1/TOMM70/PAM16/BAX/TOMM20/TIMM21/TIMM8B/HAX1/TIMM10B/ATG13/TOMM6/PITRM1/AP3B1/IMMP1L	23
GO:0140467	integrated stress response signaling	13/1119	46/18888	0.282609	4.77025	6.42467	1.67923e-06	0.000166982	0.000149292	DDIT3/TMEM33/CREB3/HSPA5/EIF2AK3/ARIH1/PPP1R15B/CEBPB/QRICH1/EIF2AK4/EIF2S1/CEBPG/NCK1	13
GO:0009060	aerobic respiration	30/1119	199/18888	0.150754	2.54463	5.49695	2.23741e-06	0.000218126	0.000195017	NDUFA4/DGUOK/COX7A2L/MDH1/ATP5F1B/NDUFV3/SURF1/GHITM/NDUFA2/NDUFA1/COX7A2/COL6A1/NDUFAB1/UQCR11/COX6A1/UQCRQ/ATP5ME/CYCS/ISCU/MLXIPL/NDUFS1/NDUFV2/NDUFA6/COQ9/NDUFA10/SHMT2/FH/IDH2/MDH2/DLAT	30
GO:0090151	establishment of protein localization to mitochondrial membrane	11/1119	34/18888	0.323529	5.46097	6.53329	2.42846e-06	0.000232198	0.000207599	TOMM40/TOMM7/TOMM5/MTCH1/TOMM70/BAX/TOMM20/TIMM8B/TIMM10B/TOMM6/AP3B1	11
GO:0006354	DNA-templated transcription elongation	23/1119	135/18888	0.17037	2.87574	5.4887	4.21423e-06	0.000395343	0.00035346	MED8/ELP4/CCNK/ELP2/MED10/INTS8/MED14/TSFM/SETD5/TCERG1/GTF2F1/ENY2/MED29/WDR43/INTS10/GTF2H5/HNRNPU/MED4/NCBP2/EAF2/CCNT1/INTS4/CTDP1	23
GO:0061615	glycolytic process through fructose-6-phosphate	9/1119	24/18888	0.375	6.32976	6.55634	5.06126e-06	0.000459917	0.000411193	HK2/ENO1/ENO2/HK1/PRKACA/PKM/PFKP/FOXK1/ADPGK	9
GO:0031669	cellular response to nutrient levels	33/1119	239/18888	0.138075	2.33062	5.19507	5.08757e-06	0.000459917	0.000411193	MAP1LC3B/MFSD2A/CDKN1A/SLC2A1/XBP1/SFRP1/WDR45B/SESN1/NPRL2/SESN2/MYBBP1A/TFEB/PRKAB1/SEC13/RNF167/WRN/HSPA5/EIF2AK3/FADS1/MDM2/EIF2AK4/EIF2S1/MLXIPL/SLC7A5/FBXO22/WIPI1/CLEC16A/RPTOR/MTOR/JMY/GABARAP/TBL2/UPP1	33
GO:0006090	pyruvate metabolic process	21/1119	118/18888	0.177966	3.00395	5.47976	5.38205e-06	0.000477849	0.000427226	HK2/DDIT4/SLC16A3/ENO1/ENO2/PDK3/HK1/PDHX/PRKACA/PKM/PFKP/FOXK1/VDAC1/COL6A1/MLXIPL/GPI/ME2/ADPGK/RPTOR/MTOR/DLAT	21
GO:0000375	RNA splicing, via transesterification reactions	42/1119	341/18888	0.123167	2.07898	5.04568	5.61613e-06	0.000482637	0.000431506	EIF1/LSM4/HNRNPH3/PPIL3/SMNDC1/HNRNPC/XAB2/PRDX6/BUD31/PPIE/MPHOSPH10/DDX42/THRAP3/KHDC4/SF3A3/SRSF4/SART1/HNRNPU/NCBP2/HNRNPF/SNRPD2/PLRG1/SF3B2/MAGOH/IK/KHDRBS1/PRPF19/EIF4A3/SNRPA1/LSM5/NCL/SF3B5/TSSC4/AQR/CWC25/SFSWAP/SCNM1/C9orf78/RNF113A/CTNNBL1/PRPF8/HTATSF1	42
GO:0009199	ribonucleoside triphosphate metabolic process	34/1119	251/18888	0.135458	2.28645	5.1488	5.63012e-06	0.000482637	0.000431506	HK2/DDIT4/ENO1/ENO2/HK1/PRKACA/IMPDH2/PKM/PFKP/ATP5F1B/NDUFV3/NME7/NDUFA2/ATP5MC1/FOXK1/NDUFA1/COL6A1/NDUFAB1/ENTPD7/ATP5ME/CTPS2/ATP1B1/MLXIPL/GPI/PID1/NDUFS1/HSPA1A/NDUFV2/ADPGK/NDUFA6/RPTOR/NME2/MTOR/NDUFA10	34
GO:0036499	PERK-mediated unfolded protein response	8/1119	19/18888	0.421053	7.1071	6.68347	6.21642e-06	0.000523865	0.000468366	DDIT3/TMEM33/HSPA5/EIF2AK3/PPP1R15B/QRICH1/EIF2S1/NCK1	8
GO:0002183	cytoplasmic translational initiation	12/1119	44/18888	0.272727	4.60346	6.00516	6.34004e-06	0.000525378	0.000469719	SLBP/EIF3J/EIF2B1/EIF3B/EIF2AK4/EIF2B2/NCBP2/EIF3L/EIF3M/MTOR/NCK1/EIF3D	12
GO:0006417	regulation of translation	51/1119	451/18888	0.113082	1.90875	4.90178	7.03316e-06	0.00057326	0.000512529	PER1/ALKBH5/DNAJC3/TRAP1/EIF1/ZNF598/ELP4/SERP1/SESN2/ELP2/PKM/CNOT9/EIF2AK3/TSFM/EIF1B/DAPK3/PPP1R15B/EIF4H/EIF3B/EIF2AK4/HNRNPU/CNBP/NOLC1/EIF2B2/NCBP2/EIF2S1/BTG2/PIWIL2/MAGOH/PAIP2B/EIF4EBP1/ELP1/EIF5B/KHDRBS1/EIF4G3/EIF4A3/LARP4B/MTOR/NCL/OGFOD1/MPV17L2/MKNK2/SHMT2/SELENOT/FASTKD2/NCK1/EIF4B/CPEB1/SERBP1/EIF3D/ELP3	51
GO:0065002	intracellular protein transmembrane transport	10/1119	31/18888	0.322581	5.44495	6.21551	7.22141e-06	0.000574959	0.000514047	USP9X/SEC61A1/SEC61B/SEC63/HSPA5/SRP54/SEC61G/SEC61A2/PEX2/TRAM1	10
GO:0042773	ATP synthesis coupled electron transport	19/1119	102/18888	0.186275	3.14419	5.44894	7.51475e-06	0.000574959	0.000514047	NDUFA4/DGUOK/COX7A2L/NDUFV3/GHITM/NDUFA2/NDUFA1/COX7A2/NDUFAB1/UQCR11/COX6A1/UQCRQ/CYCS/ISCU/NDUFS1/NDUFV2/NDUFA6/COQ9/NDUFA10	19
GO:0042775	mitochondrial ATP synthesis coupled electron transport	19/1119	102/18888	0.186275	3.14419	5.44894	7.51475e-06	0.000574959	0.000514047	NDUFA4/DGUOK/COX7A2L/NDUFV3/GHITM/NDUFA2/NDUFA1/COX7A2/NDUFAB1/UQCR11/COX6A1/UQCRQ/CYCS/ISCU/NDUFS1/NDUFV2/NDUFA6/COQ9/NDUFA10	19
GO:0006890	retrograde vesicle-mediated transport, Golgi to endoplasmic reticulum	13/1119	52/18888	0.25	4.21984	5.83454	7.51655e-06	0.000574959	0.000514047	ARF4/KDELR2/COPB2/RER1/COG3/ARCN1/BET1L/RAB6A/COPA/RAB33B/SEC22B/ATP9B/RINT1	13
GO:0009205	purine ribonucleoside triphosphate metabolic process	33/1119	244/18888	0.135246	2.28286	5.0614	7.9552e-06	0.000599292	0.000535802	HK2/DDIT4/ENO1/ENO2/HK1/PRKACA/IMPDH2/PKM/PFKP/ATP5F1B/NDUFV3/NME7/NDUFA2/ATP5MC1/FOXK1/NDUFA1/COL6A1/NDUFAB1/ENTPD7/ATP5ME/ATP1B1/MLXIPL/GPI/PID1/NDUFS1/HSPA1A/NDUFV2/ADPGK/NDUFA6/RPTOR/NME2/MTOR/NDUFA10	33
GO:0007033	vacuole organization	32/1119	234/18888	0.136752	2.30829	5.05348	8.61799e-06	0.000639532	0.00057178	MAP1LC3B/WDR45B/ATP6AP2/CHMP2A/TFEB/ANXA2/TMEM41B/ATP6V0B/ATG4A/VMP1/RAB14/TOM1/CHMP2B/C9orf72/RAB33B/TMEM39A/LAPTM4B/ATG13/EMC6/ATG9A/IFT20/ATG101/WIPI1/MTOR/EXT1/GABARAP/RAB3GAP2/BAG3/SEC22B/AP3B1/ATP6V0A1/CHMP5	32
GO:0061620	glycolytic process through glucose-6-phosphate	8/1119	20/18888	0.4	6.75174	6.45828	9.82278e-06	0.000718219	0.00064213	HK2/ENO1/ENO2/HK1/PKM/PFKP/FOXK1/ADPGK	8
GO:0022904	respiratory electron transport chain	21/1119	123/18888	0.170732	2.88184	5.25444	1.05245e-05	0.000743658	0.000664875	NDUFA4/DGUOK/COX7A2L/MYBBP1A/NDUFV3/GHITM/NDUFA2/NDUFA1/COX7A2/NDUFAB1/UQCR11/COX6A1/ETFB/UQCRQ/CYCS/ISCU/NDUFS1/NDUFV2/NDUFA6/COQ9/NDUFA10	21
GO:0007008	outer mitochondrial membrane organization	7/1119	15/18888	0.466667	7.87703	6.68638	1.06194e-05	0.000743658	0.000664875	TOMM40/TOMM7/TOMM5/MTCH1/TOMM70/TOMM20/TOMM6	7
GO:0045040	protein insertion into mitochondrial outer membrane	7/1119	15/18888	0.466667	7.87703	6.68638	1.06194e-05	0.000743658	0.000664875	TOMM40/TOMM7/TOMM5/MTCH1/TOMM70/TOMM20/TOMM6	7
GO:0000045	autophagosome assembly	20/1119	114/18888	0.175439	2.96129	5.27085	1.11729e-05	0.000771549	0.000689811	MAP1LC3B/WDR45B/TMEM41B/ATG4A/VMP1/TOM1/C9orf72/RAB33B/TMEM39A/ATG13/EMC6/ATG9A/IFT20/ATG101/WIPI1/MTOR/GABARAP/RAB3GAP2/BAG3/SEC22B	20
GO:0008380	RNA splicing	53/1119	484/18888	0.109504	1.84836	4.74473	1.17537e-05	0.000800538	0.000715729	EIF1/LSM4/FAM98A/HNRNPH3/PPIL3/POLR2A/SMNDC1/HNRNPC/XAB2/PRDX6/BUD31/RTRAF/PPIE/MPHOSPH10/TCERG1/ENY2/DDX42/THRAP3/KHDC4/SF3A3/SRSF4/SART1/TADA2B/CRIPT/HNRNPU/NCBP2/HNRNPF/SNRPD2/PLRG1/SF3B2/MAGOH/IK/HSPA1A/KHDRBS1/PRPF19/EIF4A3/SNRPA1/LSM5/NCL/IVNS1ABP/SF3B5/TSSC4/HNRNPLL/AQR/CWC25/SFSWAP/SCNM1/C9orf78/RNF113A/CTNNBL1/HNRNPH2/PRPF8/HTATSF1	53
GO:0022900	electron transport chain	26/1119	175/18888	0.148571	2.50779	5.02867	1.3568e-05	0.000911621	0.000815044	NDUFA4/DGUOK/COX7A2L/MYBBP1A/ASPH/NDUFV3/SURF1/GHITM/NDUFA2/NDUFA1/COX7A2/NDUFAB1/UQCR11/COX6A1/ETFB/UQCRQ/CYCS/ISCU/NDUFS1/ME2/NDUFV2/NDUFA6/COQ9/NDUFA10/P4HA2/PHGDH	26
GO:0097193	intrinsic apoptotic signaling pathway	39/1119	319/18888	0.122257	2.06362	4.80787	1.42689e-05	0.000945933	0.00084572	DDIT4/DDIT3/TNFRSF10B/P4HB/CDKN1A/XBP1/ENO1/TRAP1/ERO1A/HERPUD1/AEN/MYBBP1A/BBC3/SELENOS/CLU/CREB3/HYOU1/EIF2AK3/BAG5/BAX/SELENOK/MIF/MDM2/CEBPB/QRICH1/SERINC3/CYCS/RRM2B/TNFRSF1A/HSPA1A/APAF1/ARL6IP5/VDAC2/IVNS1ABP/JMY/ATM/NCK1/JAK2/HIPK1	39
GO:0006368	transcription elongation by RNA polymerase II	20/1119	116/18888	0.172414	2.91023	5.17875	1.45998e-05	0.000955134	0.000853946	MED8/ELP4/CCNK/ELP2/MED10/INTS8/MED14/TCERG1/GTF2F1/ENY2/MED29/WDR43/INTS10/HNRNPU/MED4/NCBP2/EAF2/CCNT1/INTS4/CTDP1	20
GO:0016236	macroautophagy	41/1119	343/18888	0.119534	2.01765	4.77306	1.49542e-05	0.000958499	0.000856955	MAP1LC3B/BNIP3L/UFM1/WDR45B/SESN1/SESN2/PRKACA/CHMP2A/USP36/DDRGK1/TOMM7/TMEM41B/ATP6V0B/ATG4A/VMP1/VDAC1/PDCD6IP/STAM2/TOM1/CHMP2B/C9orf72/RAB33B/TMEM39A/PEX2/ATG13/EMC6/ATG9A/IFT20/ATG101/WIPI1/CLEC16A/SPTLC1/EI24/MTOR/ATM/GABARAP/RAB3GAP2/BAG3/SEC22B/ATP6V0A1/CHMP5	41
GO:0019511	peptidyl-proline hydroxylation	6/1119	11/18888	0.545455	9.20692	6.83243	1.52296e-05	0.000958499	0.000856955	P4HB/P4HA1/CRTAP/OGFOD1/EGLN1/P4HA2	6
GO:0034975	protein folding in endoplasmic reticulum	6/1119	11/18888	0.545455	9.20692	6.83243	1.52296e-05	0.000958499	0.000856955	P4HB/DNAJC3/CANX/ERO1A/HSPA5/HSP90B1	6
GO:0006487	protein N-linked glycosylation	15/1119	72/18888	0.208333	3.51653	5.36871	1.68277e-05	0.00104584	0.000935043	ALG13/GFPT1/STT3A/ALG3/DAD1/DPM1/MOGS/NUS1/MLEC/GAL3ST1/RPN1/ALG2/FUT5/PGM3/DERL3	15
GO:0090110	COPII-coated vesicle cargo loading	7/1119	16/18888	0.4375	7.38472	6.41147	1.79126e-05	0.00108612	0.000971054	SEC31A/SEC24A/SEC24C/SEC23A/SEC13/SEC24D/SEC23B	7
GO:2000232	regulation of rRNA processing	7/1119	16/18888	0.4375	7.38472	6.41147	1.79126e-05	0.00108612	0.000971054	TRMT112/USP36/BUD23/WDR43/WDR75/NUDT16/RIOK2	7
GO:0006119	oxidative phosphorylation	23/1119	148/18888	0.155405	2.62314	4.97471	2.01001e-05	0.00120407	0.00107651	NDUFA4/DGUOK/COX7A2L/ATP5F1B/NDUFV3/GHITM/NDUFA2/NDUFA1/COX7A2/NDUFAB1/UQCR11/COX6A1/UQCRQ/ATP5ME/CYCS/ISCU/MLXIPL/NDUFS1/NDUFV2/NDUFA6/COQ9/NDUFA10/SHMT2	23
GO:0000377	RNA splicing, via transesterification reactions with bulged adenosine as nucleophile	40/1119	337/18888	0.118694	2.00348	4.66452	2.23e-05	0.00130442	0.00116623	EIF1/LSM4/HNRNPH3/PPIL3/HNRNPC/XAB2/PRDX6/BUD31/PPIE/DDX42/THRAP3/KHDC4/SF3A3/SRSF4/SART1/HNRNPU/NCBP2/HNRNPF/SNRPD2/PLRG1/SF3B2/MAGOH/IK/KHDRBS1/PRPF19/EIF4A3/SNRPA1/LSM5/NCL/SF3B5/TSSC4/AQR/CWC25/SFSWAP/SCNM1/C9orf78/RNF113A/CTNNBL1/PRPF8/HTATSF1	40
GO:0000398	mRNA splicing, via spliceosome	40/1119	337/18888	0.118694	2.00348	4.66452	2.23e-05	0.00130442	0.00116623	EIF1/LSM4/HNRNPH3/PPIL3/HNRNPC/XAB2/PRDX6/BUD31/PPIE/DDX42/THRAP3/KHDC4/SF3A3/SRSF4/SART1/HNRNPU/NCBP2/HNRNPF/SNRPD2/PLRG1/SF3B2/MAGOH/IK/KHDRBS1/PRPF19/EIF4A3/SNRPA1/LSM5/NCL/SF3B5/TSSC4/AQR/CWC25/SFSWAP/SCNM1/C9orf78/RNF113A/CTNNBL1/PRPF8/HTATSF1	40
GO:0032784	regulation of DNA-templated transcription elongation	18/1119	101/18888	0.178218	3.0082	5.07814	2.43092e-05	0.00140541	0.00125652	MED8/CCNK/MED10/INTS8/MED14/TSFM/SETD5/TCERG1/GTF2F1/MED29/WDR43/INTS10/HNRNPU/MED4/NCBP2/EAF2/CCNT1/INTS4	18
GO:0009165	nucleotide biosynthetic process	36/1119	293/18888	0.122867	2.07391	4.64912	2.70454e-05	0.00154563	0.00138189	ENO1/GUK1/PDK3/DGUOK/SLC4A7/PDHX/IMPDH2/ELOVL5/ATP5F1B/NDUFV3/NADK2/NME7/NDUFA2/ADK/ATP5MC1/NDUFA1/PPAT/ACSL4/NDUFAB1/ATP5ME/CTPS2/RRM2B/TBPL1/PID1/PAICS/NDUFS1/NDUFV2/NDUFA6/MMUT/NME2/NDUFA10/AMPD2/ATIC/UPP1/DCTD/DLAT	36
GO:1905037	autophagosome organization	20/1119	121/18888	0.165289	2.78998	4.95687	2.76442e-05	0.0015619	0.00139643	MAP1LC3B/WDR45B/TMEM41B/ATG4A/VMP1/TOM1/C9orf72/RAB33B/TMEM39A/ATG13/EMC6/ATG9A/IFT20/ATG101/WIPI1/MTOR/GABARAP/RAB3GAP2/BAG3/SEC22B	20
GO:0036490	regulation of translation in response to endoplasmic reticulum stress	6/1119	12/18888	0.5	8.43968	6.46926	2.89286e-05	0.0016161	0.00144489	DNAJC3/SESN2/EIF2AK3/EIF2AK4/EIF2S1/NCK1	6
GO:1901293	nucleoside phosphate biosynthetic process	36/1119	295/18888	0.122034	2.05985	4.60413	3.13068e-05	0.00172953	0.0015463	ENO1/GUK1/PDK3/DGUOK/SLC4A7/PDHX/IMPDH2/ELOVL5/ATP5F1B/NDUFV3/NADK2/NME7/NDUFA2/ADK/ATP5MC1/NDUFA1/PPAT/ACSL4/NDUFAB1/ATP5ME/CTPS2/RRM2B/TBPL1/PID1/PAICS/NDUFS1/NDUFV2/NDUFA6/MMUT/NME2/NDUFA10/AMPD2/ATIC/UPP1/DCTD/DLAT	36
GO:0018126	protein hydroxylation	8/1119	23/18888	0.347826	5.87108	5.86578	3.25898e-05	0.00178062	0.00159198	P4HB/P4HA1/ASPH/P3H4/CRTAP/OGFOD1/EGLN1/P4HA2	8
GO:0019646	aerobic electron transport chain	17/1119	94/18888	0.180851	3.05265	5.0065	3.33582e-05	0.00180279	0.00161181	NDUFA4/COX7A2L/NDUFV3/NDUFA2/NDUFA1/COX7A2/NDUFAB1/UQCR11/COX6A1/UQCRQ/CYCS/ISCU/NDUFS1/NDUFV2/NDUFA6/COQ9/NDUFA10	17
GO:0090114	COPII-coated vesicle budding	11/1119	44/18888	0.25	4.21984	5.36586	3.76748e-05	0.00201419	0.0018008	SEC31A/SEC24A/SEC24C/SEC23A/SEC13/SEC24D/SEC23B/TRAPPC4/SAR1B/TRAPPC3/TRAPPC11	11
GO:0034243	regulation of transcription elongation by RNA polymerase II	16/1119	86/18888	0.186047	3.14035	4.99225	3.93299e-05	0.0020803	0.00185991	MED8/CCNK/MED10/INTS8/MED14/TCERG1/GTF2F1/MED29/WDR43/INTS10/HNRNPU/MED4/NCBP2/EAF2/CCNT1/INTS4	16
GO:1900101	regulation of endoplasmic reticulum unfolded protein response	9/1119	30/18888	0.3	5.06381	5.58999	4.0098e-05	0.0020986	0.00187627	XBP1/DNAJB9/DDRGK1/TMEM33/HSPA5/BAX/PPP1R15B/BFAR/NCK1	9
GO:0046034	ATP metabolic process	29/1119	220/18888	0.131818	2.22501	4.58633	4.46496e-05	0.00225325	0.00201454	HK2/DDIT4/ENO1/ENO2/HK1/PRKACA/PKM/PFKP/ATP5F1B/NDUFV3/NDUFA2/ATP5MC1/FOXK1/NDUFA1/COL6A1/NDUFAB1/ATP5ME/ATP1B1/MLXIPL/GPI/PID1/NDUFS1/HSPA1A/NDUFV2/ADPGK/NDUFA6/RPTOR/MTOR/NDUFA10	29
GO:0006735	NADH regeneration	7/1119	18/18888	0.388889	6.56419	5.92676	4.48657e-05	0.00225325	0.00201454	HK2/ENO1/ENO2/HK1/PKM/PFKP/FOXK1	7
GO:0061621	canonical glycolysis	7/1119	18/18888	0.388889	6.56419	5.92676	4.48657e-05	0.00225325	0.00201454	HK2/ENO1/ENO2/HK1/PKM/PFKP/FOXK1	7
GO:0061718	glucose catabolic process to pyruvate	7/1119	18/18888	0.388889	6.56419	5.92676	4.48657e-05	0.00225325	0.00201454	HK2/ENO1/ENO2/HK1/PKM/PFKP/FOXK1	7
GO:0006626	protein targeting to mitochondrion	18/1119	106/18888	0.169811	2.86631	4.83537	4.75093e-05	0.00236216	0.00211191	BNIP3L/USP36/TOMM40/TOMM7/HSPD1/TOMM5/MTCH1/TOMM70/PAM16/TOMM20/TIMM21/TIMM8B/HAX1/TIMM10B/ATG13/TOMM6/PITRM1/IMMP1L	18
GO:0031668	cellular response to extracellular stimulus	33/1119	269/18888	0.122677	2.0707	4.43845	5.939e-05	0.00292363	0.0026139	MAP1LC3B/MFSD2A/CDKN1A/SLC2A1/XBP1/SFRP1/WDR45B/SESN1/NPRL2/SESN2/MYBBP1A/TFEB/PRKAB1/SEC13/RNF167/WRN/HSPA5/EIF2AK3/FADS1/MDM2/EIF2AK4/EIF2S1/MLXIPL/SLC7A5/FBXO22/WIPI1/CLEC16A/RPTOR/MTOR/JMY/GABARAP/TBL2/UPP1	33
GO:0016482	cytosolic transport	21/1119	138/18888	0.152174	2.5686	4.64104	6.22672e-05	0.00303522	0.00271367	ARL1/GOLT1B/TMEM87B/BET1L/VPS53/YKT6/KIF1A/TBC1D23/PREPL/SYT4/AP2A1/RAB14/STX5/RAB6A/TMEM87A/EVI5/WIPI1/TBC1D10A/RAB9B/WIPF3/GCC2	21
GO:0009259	ribonucleotide metabolic process	49/1119	466/18888	0.10515	1.77487	4.25028	7.01475e-05	0.00334346	0.00298925	HK2/DDIT4/ENO1/ENO2/GUK1/PDK3/HK1/PDHX/PRKACA/IMPDH2/PKM/ELOVL5/PFKP/ATP5F1B/MCEE/NDUFV3/NME7/NDUFA2/ADK/ATP5MC1/FOXK1/NDUFA1/CASK/PPAT/ACSL4/COL6A1/NDUFAB1/ENTPD7/ATP5ME/CTPS2/ATP1B1/MLXIPL/GPI/PID1/PAICS/NDUFS1/HSPA1A/NDUFV2/ADPGK/NDUFA6/RPTOR/MMUT/NME2/MTOR/NDUFA10/AMPD2/ATIC/UPP1/DLAT	49
GO:0006734	NADH metabolic process	9/1119	32/18888	0.28125	4.74732	5.32397	7.0608e-05	0.00334346	0.00298925	HK2/ENO1/ENO2/HK1/PKM/PFKP/MDH1/FOXK1/MDH2	9
GO:1902235	regulation of endoplasmic reticulum stress-induced intrinsic apoptotic signaling pathway	9/1119	32/18888	0.28125	4.74732	5.32397	7.0608e-05	0.00334346	0.00298925	XBP1/HERPUD1/SELENOS/CREB3/HYOU1/EIF2AK3/SERINC3/HSPA1A/NCK1	9
GO:0009260	ribonucleotide biosynthetic process	29/1119	226/18888	0.128319	2.16594	4.42501	7.30584e-05	0.00342685	0.00306381	ENO1/PDK3/PDHX/IMPDH2/ELOVL5/ATP5F1B/NDUFV3/NME7/NDUFA2/ADK/ATP5MC1/NDUFA1/PPAT/ACSL4/NDUFAB1/ATP5ME/CTPS2/PID1/PAICS/NDUFS1/NDUFV2/NDUFA6/MMUT/NME2/NDUFA10/AMPD2/ATIC/UPP1/DLAT	29
GO:0009185	ribonucleoside diphosphate metabolic process	19/1119	120/18888	0.158333	2.67256	4.61243	7.95579e-05	0.00369684	0.00330519	HK2/DDIT4/ENO1/ENO2/GUK1/HK1/PRKACA/PKM/PFKP/FOXK1/CASK/COL6A1/ENTPD7/MLXIPL/RRM2B/GPI/ADPGK/RPTOR/MTOR	19
GO:1903894	regulation of IRE1-mediated unfolded protein response	6/1119	14/18888	0.428571	7.23401	5.85551	8.48216e-05	0.00390494	0.00349124	DNAJB9/DDRGK1/TMEM33/HSPA5/BAX/BFAR	6
GO:0009150	purine ribonucleotide metabolic process	47/1119	446/18888	0.105381	1.77877	4.17672	9.28759e-05	0.0042365	0.00378769	HK2/DDIT4/ENO1/ENO2/GUK1/PDK3/HK1/PDHX/PRKACA/IMPDH2/PKM/ELOVL5/PFKP/ATP5F1B/MCEE/NDUFV3/NME7/NDUFA2/ADK/ATP5MC1/FOXK1/NDUFA1/CASK/PPAT/ACSL4/COL6A1/NDUFAB1/ENTPD7/ATP5ME/ATP1B1/MLXIPL/GPI/PID1/PAICS/NDUFS1/HSPA1A/NDUFV2/ADPGK/NDUFA6/RPTOR/MMUT/NME2/MTOR/NDUFA10/AMPD2/ATIC/DLAT	47
GO:0071496	cellular response to external stimulus	38/1119	335/18888	0.113433	1.91467	4.23883	9.42824e-05	0.00426156	0.00381009	MAP1LC3B/TNFRSF10B/MFSD2A/CDKN1A/SLC2A1/XBP1/SFRP1/WDR45B/SESN1/NPRL2/SESN2/MYBBP1A/TFEB/PRKAB1/SEC13/RNF167/WRN/HSPA5/EIF2AK3/FADS1/MDM2/GADD45A/EIF2AK4/TMEM87A/EIF2S1/MLXIPL/SLC7A5/FBXO22/TNFRSF1A/WIPI1/CLEC16A/RPTOR/MTOR/JMY/GABARAP/BAG3/TBL2/UPP1	38
GO:0072522	purine-containing compound biosynthetic process	32/1119	264/18888	0.121212	2.04598	4.29492	9.60336e-05	0.00430148	0.00384578	ENO1/GUK1/PDK3/DGUOK/SLC4A7/PDHX/IMPDH2/ELOVL5/ATP5F1B/NDUFV3/NADK2/NME7/NDUFA2/ADK/ATP5MC1/NDUFA1/PPAT/ACSL4/NDUFAB1/ATP5ME/ADAL/PID1/PAICS/NDUFS1/NDUFV2/NDUFA6/MMUT/NME2/NDUFA10/AMPD2/ATIC/DLAT	32
GO:0070085	glycosylation	30/1119	241/18888	0.124481	2.10116	4.31739	9.68959e-05	0.00430148	0.00384578	ALG13/GFPT1/STT3A/ALG3/COG3/SERP1/GOLGA2/DAD1/DPM1/EDEM3/MOGS/NUS1/MLEC/NANS/GAL3ST1/ST8SIA4/RPN1/ALG2/COG1/COG5/ST6GAL2/FUT5/PGM3/EXT1/ST3GAL5/POFUT2/DPY19L3/EOGT/DERL3/POGLUT2	30
GO:0036498	IRE1-mediated unfolded protein response	7/1119	20/18888	0.35	5.90777	5.51064	9.84202e-05	0.00433049	0.00387171	XBP1/DNAJB9/DDRGK1/TMEM33/HSPA5/BAX/BFAR	7
GO:0061077	chaperone-mediated protein folding	14/1119	75/18888	0.186667	3.15081	4.68349	0.000113502	0.00495027	0.00442584	TRAP1/ERO1A/PFDN2/HSPA9/CLU/HSPA13/HSPA5/FKBP11/TCP1/HSPA1A/CRTAP/DNAJB4/HSPH1/CCT6A	14
GO:0031647	regulation of protein stability	37/1119	326/18888	0.113497	1.91576	4.18544	0.000114566	0.00495323	0.00442848	USP9X/PFDN2/COG3/USP36/DDRGK1/CRYAB/TOMM7/TMEM183A/HSPD1/DAD1/ASPH/CLU/CAMLG/BAG5/SERF2/APTX/CEP63/MDM2/TCP1/PEX2/ATP1B1/HSP90AB1/NAA15/HSPA1A/MDM4/GTPBP4/ISOC2/CRTAP/PRNP/MTOR/SEL1L/RUVBL1/BAG3/NAPG/AAK1/UTP25/CCT6A	37
GO:0035459	vesicle cargo loading	9/1119	34/18888	0.264706	4.46806	5.07914	0.000118612	0.00499638	0.00446706	SEC31A/SEC24A/SEC24C/AP3D1/SEC23A/SEC13/SEC24D/SEC23B/AP3B1	9
GO:0043434	response to peptide hormone	46/1119	438/18888	0.105023	1.77272	4.10606	0.000118971	0.00499638	0.00446706	SYAP1/PAX6/TIMP1/SLC2A1/XBP1/NEFL/VAMP2/LONP1/SESN2/PRKACA/PKM/SELENOS/ADIPOR1/CRY2/NUDC/COL6A1/MDM2/EIF2B1/SRSF4/NR4A1/APPL1/CRY1/LEPROTL1/EIF2B2/BTG1/SOCS2/BTG2/PXN/PID1/GOT1/ACE/NME2/MTOR/NCL/IRS2/NDEL1/WDTC1/ASS1/ALPL/USO1/INSIG2/NCK1/JAK2/CPEB1/PIK3C2A/ERRFI1	46
GO:0006614	SRP-dependent cotranslational protein targeting to membrane	8/1119	27/18888	0.296296	5.00129	5.22113	0.000119328	0.00499638	0.00446706	SEC61A1/SEC61B/SEC63/SRPRB/SRPRA/SRP54/SEC61A2/TRAM1	8
GO:0043648	dicarboxylic acid metabolic process	16/1119	94/18888	0.170213	2.87308	4.56853	0.000119583	0.00499638	0.00446706	MTHFD2/MDH1/SLC25A32/ALDH18A1/COL6A1/L2HGDH/SDHAF3/GOT1/ME2/GGT1/ASS1/FH/ATIC/IDH2/MDH2/MTRR	16
GO:0006164	purine nucleotide biosynthetic process	31/1119	256/18888	0.121094	2.04398	4.22036	0.00012485	0.00517295	0.00462492	ENO1/GUK1/PDK3/DGUOK/SLC4A7/PDHX/IMPDH2/ELOVL5/ATP5F1B/NDUFV3/NADK2/NME7/NDUFA2/ADK/ATP5MC1/NDUFA1/PPAT/ACSL4/NDUFAB1/ATP5ME/PID1/PAICS/NDUFS1/NDUFV2/NDUFA6/MMUT/NME2/NDUFA10/AMPD2/ATIC/DLAT	31
GO:0046390	ribose phosphate biosynthetic process	29/1119	233/18888	0.124464	2.10086	4.24306	0.000126041	0.00517913	0.00463045	ENO1/PDK3/PDHX/IMPDH2/ELOVL5/ATP5F1B/NDUFV3/NME7/NDUFA2/ADK/ATP5MC1/NDUFA1/PPAT/ACSL4/NDUFAB1/ATP5ME/CTPS2/PID1/PAICS/NDUFS1/NDUFV2/NDUFA6/MMUT/NME2/NDUFA10/AMPD2/ATIC/UPP1/DLAT	29
GO:0009152	purine ribonucleotide biosynthetic process	27/1119	211/18888	0.127962	2.15992	4.25187	0.000133802	0.00542836	0.00485328	ENO1/PDK3/PDHX/IMPDH2/ELOVL5/ATP5F1B/NDUFV3/NME7/NDUFA2/ADK/ATP5MC1/NDUFA1/PPAT/ACSL4/NDUFAB1/ATP5ME/PID1/PAICS/NDUFS1/NDUFV2/NDUFA6/MMUT/NME2/NDUFA10/AMPD2/ATIC/DLAT	27
GO:1900102	negative regulation of endoplasmic reticulum unfolded protein response	6/1119	15/18888	0.4	6.75174	5.59229	0.00013429	0.00542836	0.00485328	DNAJB9/DDRGK1/HSPA5/PPP1R15B/BFAR/NCK1	6
GO:0009127	purine nucleoside monophosphate biosynthetic process	7/1119	21/18888	0.333333	5.62645	5.32318	0.000140108	0.00557294	0.00498254	DGUOK/IMPDH2/ADK/PPAT/PAICS/AMPD2/ATIC	7
GO:0019677	NAD catabolic process	7/1119	21/18888	0.333333	5.62645	5.32318	0.000140108	0.00557294	0.00498254	HK2/ENO1/ENO2/HK1/PKM/PFKP/FOXK1	7
GO:2000234	positive regulation of rRNA processing	5/1119	10/18888	0.5	8.43968	5.90529	0.000141847	0.00559735	0.00500436	TRMT112/BUD23/WDR43/WDR75/RIOK2	5
GO:0019693	ribose phosphate metabolic process	49/1119	480/18888	0.102083	1.7231	4.027	0.000144907	0.0056621	0.00506226	HK2/DDIT4/ENO1/ENO2/GUK1/PDK3/HK1/PDHX/PRKACA/IMPDH2/PKM/ELOVL5/PFKP/ATP5F1B/MCEE/NDUFV3/NME7/NDUFA2/ADK/ATP5MC1/FOXK1/NDUFA1/CASK/PPAT/ACSL4/COL6A1/NDUFAB1/ENTPD7/ATP5ME/CTPS2/ATP1B1/MLXIPL/GPI/PID1/PAICS/NDUFS1/HSPA1A/NDUFV2/ADPGK/NDUFA6/RPTOR/MMUT/NME2/MTOR/NDUFA10/AMPD2/ATIC/UPP1/DLAT	49
GO:0006900	vesicle budding from membrane	15/1119	86/18888	0.174419	2.94407	4.53445	0.000145766	0.0056621	0.00506226	SEC31A/SEC24A/SEC24C/AP3D1/ANXA2/SEC23A/SEC13/SEC24D/ARFGAP3/SEC23B/TRAPPC4/SAR1B/TRAPPC3/TRAPPC11/CHMP5	15
GO:1990542	mitochondrial transmembrane transport	16/1119	96/18888	0.166667	2.81323	4.46957	0.000154397	0.00592317	0.00529567	MPC1/TOMM40/TOMM7/HSPD1/GHITM/SLC25A26/TOMM70/SLC25A32/PAM16/VDAC1/TOMM20/TIMM21/COL6A1/MRS2/SFXN1/SLC25A16	16
GO:0009142	nucleoside triphosphate biosynthetic process	19/1119	126/18888	0.150794	2.5453	4.36741	0.00015487	0.00592317	0.00529567	ENO1/IMPDH2/ATP5F1B/NDUFV3/NME7/NDUFA2/ADK/ATP5MC1/NDUFA1/NDUFAB1/ATP5ME/CTPS2/TBPL1/PID1/NDUFS1/NDUFV2/NDUFA6/NME2/NDUFA10	19
GO:0071577	zinc ion transmembrane transport	8/1119	28/18888	0.285714	4.82267	5.07973	0.000158437	0.00601335	0.00537629	AP3D1/SLC30A5/SLC30A7/SLC39A3/SLC39A11/SLC39A7/SLC30A9/SLC39A9	8
GO:0006120	mitochondrial electron transport, NADH to ubiquinone	11/1119	51/18888	0.215686	3.64065	4.73865	0.000159787	0.00601866	0.00538104	NDUFA4/NDUFV3/NDUFA2/NDUFA1/NDUFAB1/ISCU/NDUFS1/NDUFV2/NDUFA6/COQ9/NDUFA10	11
GO:0009791	post-embryonic development	15/1119	87/18888	0.172414	2.91023	4.48147	0.000166638	0.00622952	0.00556956	VEGFA/C12orf57/ATF5/SERP1/CCDC47/BAX/RAB3A/ZFX/KDM5B/KMT2A/MMUT/MTOR/ATM/JAK2/BCL11B	15
GO:0009132	nucleoside diphosphate metabolic process	19/1119	127/18888	0.149606	2.52526	4.32795	0.000172192	0.00638909	0.00571222	HK2/DDIT4/ENO1/ENO2/GUK1/HK1/PRKACA/PKM/PFKP/FOXK1/CASK/COL6A1/ENTPD7/MLXIPL/RRM2B/GPI/ADPGK/RPTOR/MTOR	19
GO:0072524	pyridine-containing compound metabolic process	23/1119	170/18888	0.135294	2.28368	4.21906	0.000179341	0.00660508	0.00590533	HK2/DDIT4/ENO1/ENO2/HK1/PRKACA/PKM/PFKP/MDH1/NOCT/NADK2/PDXK/FOXK1/COL6A1/MLXIPL/GPI/ME2/ADPGK/RPTOR/MTOR/ALPL/IDH2/MDH2	23
GO:0009191	ribonucleoside diphosphate catabolic process	16/1119	98/18888	0.163265	2.75581	4.37314	0.000197722	0.00717573	0.00641553	HK2/DDIT4/ENO1/ENO2/HK1/PRKACA/PKM/PFKP/FOXK1/COL6A1/ENTPD7/MLXIPL/GPI/ADPGK/RPTOR/MTOR	16
GO:0042147	retrograde transport, endosome to Golgi	16/1119	98/18888	0.163265	2.75581	4.37314	0.000197722	0.00717573	0.00641553	ARL1/GOLT1B/TMEM87B/BET1L/VPS53/YKT6/TBC1D23/PREPL/STX5/RAB6A/TMEM87A/EVI5/TBC1D10A/RAB9B/WIPF3/GCC2	16
GO:1901142	insulin metabolic process	6/1119	16/18888	0.375	6.32976	5.35209	0.000204116	0.00735409	0.006575	PAX6/P4HB/SLC30A5/YIPF5/NLGN2/FOSL2	6
GO:0006829	zinc ion transport	8/1119	29/18888	0.275862	4.65637	4.94488	0.000207511	0.00742262	0.00663627	AP3D1/SLC30A5/SLC30A7/SLC39A3/SLC39A11/SLC39A7/SLC30A9/SLC39A9	8
GO:0016197	endosomal transport	33/1119	289/18888	0.114187	1.9274	3.98691	0.000234487	0.00832763	0.00744539	INPP5F/ARL1/GOLT1B/TMEM87B/BET1L/VPS53/CHMP2A/YKT6/TBC1D23/PREPL/AP3D1/RAB14/STX5/TMEM50B/MAP2K1/RAB6A/STAM2/TOM1/CHMP2B/LEPROTL1/TMEM87A/LAPTM4B/EVI5/MSN/CLEC16A/VPS13B/ALMS1/TBC1D10A/RAB9B/PXK/WIPF3/CHMP5/GCC2	33
GO:0042149	cellular response to glucose starvation	10/1119	45/18888	0.222222	3.75097	4.63641	0.000243402	0.00858295	0.00767367	SLC2A1/XBP1/SESN1/SESN2/MYBBP1A/HSPA5/EIF2AK3/SLC7A5/TBL2/UPP1	10
GO:0006096	glycolytic process	15/1119	90/18888	0.166667	2.81323	4.32696	0.000245537	0.00859725	0.00768645	HK2/DDIT4/ENO1/ENO2/HK1/PRKACA/PKM/PFKP/FOXK1/COL6A1/MLXIPL/GPI/ADPGK/RPTOR/MTOR	15
GO:0009135	purine nucleoside diphosphate metabolic process	17/1119	110/18888	0.154545	2.60863	4.24612	0.000250343	0.00861477	0.00770212	HK2/DDIT4/ENO1/ENO2/GUK1/HK1/PRKACA/PKM/PFKP/FOXK1/CASK/COL6A1/MLXIPL/GPI/ADPGK/RPTOR/MTOR	17
GO:0009179	purine ribonucleoside diphosphate metabolic process	17/1119	110/18888	0.154545	2.60863	4.24612	0.000250343	0.00861477	0.00770212	HK2/DDIT4/ENO1/ENO2/GUK1/HK1/PRKACA/PKM/PFKP/FOXK1/CASK/COL6A1/MLXIPL/GPI/ADPGK/RPTOR/MTOR	17
GO:0000041	transition metal ion transport	16/1119	100/18888	0.16	2.7007	4.27909	0.000251235	0.00861477	0.00770212	FTL/FTH1/ABCB6/AP3D1/SLC30A5/SLC30A7/SLC39A3/SLC39A11/SLC39A7/ISCU/SLC31A1/SLC30A9/ATOX1/SLC39A9/CUTC/SFXN1	16
GO:0051131	chaperone-mediated protein complex assembly	7/1119	23/18888	0.304348	5.1372	4.98203	0.0002661	0.0090232	0.00806728	LONP1/HSPD1/CLU/BBS10/HSP90AB1/PSMG3/HSPA1A	7
GO:0032386	regulation of intracellular transport	31/1119	267/18888	0.116105	1.95978	3.96359	0.000266776	0.0090232	0.00806728	INPP5F/UFM1/VAMP2/EMD/PRKACA/NUP58/CRYAB/ANXA2/NUS1/OAZ1/MAP2K1/YIPF5/MDM2/ZFAND1/SAR1B/NCBP2/KHDRBS1/EDEM1/AAAS/MSN/NDEL1/SVIP/EDEM2/RIOK2/BAG3/JAK2/RINT1/DERL3/ANP32B/ERLEC1/GCC2	31
GO:1990928	response to amino acid starvation	11/1119	54/18888	0.203704	3.43839	4.50291	0.00027285	0.00916629	0.00819521	CDKN1A/SESN1/NPRL2/SESN2/TFEB/RNF167/EIF2AK3/EIF2AK4/PEX2/EIF2S1/MTOR	11
GO:1903008	organelle disassembly	23/1119	175/18888	0.131429	2.21843	4.06362	0.000276059	0.00921186	0.00823595	MAP1LC3B/HK2/BNIP3L/UFM1/ZNF598/WDR45B/GOLGA2/SPATA18/USP36/DDRGK1/TOMM7/KLC1/ATG4A/STX5/VDAC1/USP10/ZFAND1/HAX1/ASCC3/ATG13/ATG9A/WIPI1/GABARAP	23
GO:0071826	protein-RNA complex organization	29/1119	244/18888	0.118852	2.00615	3.96967	0.000279997	0.00928098	0.00829774	NUDT21/LSM4/KLC1/XAB2/PPAN/EIF3J/DDX42/ZFAND1/EIF3B/KHDC4/SF3A3/SART1/HSP90AB1/EIF3L/SNRPD2/SF3B2/PRPF19/EIF3M/SNRPA1/RPF2/RUVBL1/SF3B5/TSSC4/ATM/FASTKD2/SFSWAP/PRPF8/HTATSF1/EIF3D	29
GO:0044743	protein transmembrane import into intracellular organelle	9/1119	38/18888	0.236842	3.99774	4.6419	0.000297606	0.00979933	0.00876118	USP9X/TOMM40/TOMM7/HSPD1/TOMM70/PAM16/TOMM20/TIMM21/PEX2	9
GO:0002098	tRNA wobble uridine modification	6/1119	17/18888	0.352941	5.95742	5.13154	0.000299692	0.00980307	0.00876453	ELP4/ELP2/CTU2/ELP1/DPH3/ELP3	6
GO:0046032	ADP catabolic process	15/1119	92/18888	0.163043	2.75207	4.22744	0.000314468	0.0102192	0.00913656	HK2/DDIT4/ENO1/ENO2/HK1/PRKACA/PKM/PFKP/FOXK1/COL6A1/MLXIPL/GPI/ADPGK/RPTOR/MTOR	15
GO:0009134	nucleoside diphosphate catabolic process	16/1119	102/18888	0.156863	2.64774	4.18733	0.000316856	0.0102299	0.00914616	HK2/DDIT4/ENO1/ENO2/HK1/PRKACA/PKM/PFKP/FOXK1/COL6A1/ENTPD7/MLXIPL/GPI/ADPGK/RPTOR/MTOR	16
GO:0006403	RNA localization	25/1119	200/18888	0.125	2.10992	3.95995	0.000335266	0.0107545	0.00961513	ALKBH5/NUP58/SEC13/NHP2/NOP58/RTRAF/SLBP/TOMM20/ENY2/FYTTD1/PARN/TCP1/HNRNPU/NCBP2/RBM33/XPOT/MAGOH/KHDRBS1/MVP/AAAS/EIF4A3/NUP43/RUVBL1/ATM/CCT6A	25
GO:0045048	protein insertion into ER membrane	8/1119	31/18888	0.258065	4.35596	4.69274	0.000343116	0.0109357	0.00977718	SEC61A1/TMCO1/SGTA/CCDC47/CAMLG/EMC6/EMC3/TRAM1	8
GO:0009145	purine nucleoside triphosphate biosynthetic process	17/1119	113/18888	0.150442	2.53937	4.11868	0.000347131	0.0109932	0.00982859	ENO1/IMPDH2/ATP5F1B/NDUFV3/NME7/NDUFA2/ADK/ATP5MC1/NDUFA1/NDUFAB1/ATP5ME/PID1/NDUFS1/NDUFV2/NDUFA6/NME2/NDUFA10	17
GO:0018208	peptidyl-proline modification	9/1119	39/18888	0.230769	3.89524	4.5419	0.000366766	0.0115415	0.0103188	P4HB/P4HA1/PPIL3/PPIE/CRTAP/OGFOD1/EGLN1/FKBP10/P4HA2	9
GO:0006486	protein glycosylation	27/1119	225/18888	0.12	2.02552	3.88339	0.000383763	0.0119254	0.010662	ALG13/GFPT1/STT3A/ALG3/COG3/SERP1/GOLGA2/DAD1/DPM1/EDEM3/MOGS/NUS1/MLEC/GAL3ST1/ST8SIA4/RPN1/ALG2/ST6GAL2/FUT5/PGM3/EXT1/ST3GAL5/POFUT2/DPY19L3/EOGT/DERL3/POGLUT2	27
GO:0043413	macromolecule glycosylation	27/1119	225/18888	0.12	2.02552	3.88339	0.000383763	0.0119254	0.010662	ALG13/GFPT1/STT3A/ALG3/COG3/SERP1/GOLGA2/DAD1/DPM1/EDEM3/MOGS/NUS1/MLEC/GAL3ST1/ST8SIA4/RPN1/ALG2/ST6GAL2/FUT5/PGM3/EXT1/ST3GAL5/POFUT2/DPY19L3/EOGT/DERL3/POGLUT2	27
GO:0019364	pyridine nucleotide catabolic process	15/1119	94/18888	0.159574	2.69351	4.13055	0.000399424	0.012335	0.0110282	HK2/DDIT4/ENO1/ENO2/HK1/PRKACA/PKM/PFKP/FOXK1/COL6A1/MLXIPL/GPI/ADPGK/RPTOR/MTOR	15
GO:1902855	regulation of non-motile cilium assembly	5/1119	12/18888	0.416667	7.03307	5.24613	0.000403387	0.0123805	0.0110689	BBS4/WRAP73/CENPJ/DYNLL1/SEPTIN7	5
GO:0032968	positive regulation of transcription elongation by RNA polymerase II	10/1119	48/18888	0.208333	3.51653	4.38074	0.000424558	0.0129503	0.0115783	MED8/CCNK/MED10/MED14/TCERG1/GTF2F1/MED29/MED4/NCBP2/CCNT1	10
GO:0045862	positive regulation of proteolysis	36/1119	336/18888	0.107143	1.8085	3.7525	0.00043189	0.0130764	0.0116911	PSMD10/FAM162A/ENO1/HERPUD1/APOE/SGTA/AURKAIP1/DDRGK1/BBC3/ANXA2/LGMN/HSPD1/ASPH/CLU/BCL2L13/MTCH1/EIF2AK3/TTBK1/KEAP1/BAX/ZER1/MDM2/CYCS/CTSL/FBXO22/HSPA1A/ZFAND2A/APAF1/ARL6IP5/TBC1D10A/GABARAP/JAK2/RCN3/NRDC/FBXW8/ANP32B	36
GO:0006613	cotranslational protein targeting to membrane	8/1119	32/18888	0.25	4.21984	4.57456	0.000433952	0.0130764	0.0116911	SEC61A1/SEC61B/SEC63/SRPRB/SRPRA/SRP54/SEC61A2/TRAM1	8
GO:0009137	purine nucleoside diphosphate catabolic process	15/1119	95/18888	0.157895	2.66516	4.08305	0.000448812	0.0133316	0.0119193	HK2/DDIT4/ENO1/ENO2/HK1/PRKACA/PKM/PFKP/FOXK1/COL6A1/MLXIPL/GPI/ADPGK/RPTOR/MTOR	15
GO:0009181	purine ribonucleoside diphosphate catabolic process	15/1119	95/18888	0.157895	2.66516	4.08305	0.000448812	0.0133316	0.0119193	HK2/DDIT4/ENO1/ENO2/HK1/PRKACA/PKM/PFKP/FOXK1/COL6A1/MLXIPL/GPI/ADPGK/RPTOR/MTOR	15
GO:0043414	macromolecule methylation	23/1119	181/18888	0.127072	2.14489	3.88388	0.000450465	0.0133316	0.0119193	PAX6/TRMT112/RNMT/FAM98A/EEF1AKMT3/BUD23/RLF/SETD3/SLC25A26/LCMT1/DALRD3/RAB6A/THUMPD3/HEMK1/EMG1/SNRPD2/PCMT1/KMT2A/METTL23/TRMT1L/SMCHD1/MTRR/TRMT10A	23
GO:1903241	U2-type prespliceosome assembly	7/1119	25/18888	0.28	4.72622	4.67841	0.000470116	0.0138309	0.0123656	DDX42/SF3A3/SNRPD2/SF3B2/SNRPA1/SF3B5/HTATSF1	7
GO:0046364	monosaccharide biosynthetic process	15/1119	96/18888	0.15625	2.6374	4.03616	0.000503333	0.014721	0.0131615	ENO1/ENO2/SESN2/PRKACA/MDH1/SELENOS/PGP/CRY1/SDHAF3/GPI/GOT1/DDB1/PPP4R3B/AKR1A1/MDH2	15
GO:0006458	'de novo' protein folding	9/1119	41/18888	0.219512	3.70522	4.3515	0.000544975	0.0158457	0.014167	ERO1A/HSPD1/HSPA9/HSPA13/HSPA5/SELENOF/HSPA1A/DNAJB4/HSPH1	9
GO:0072526	pyridine-containing compound catabolic process	15/1119	97/18888	0.154639	2.61021	3.98987	0.000563413	0.0162866	0.0145612	HK2/DDIT4/ENO1/ENO2/HK1/PRKACA/PKM/PFKP/FOXK1/COL6A1/MLXIPL/GPI/ADPGK/RPTOR/MTOR	15
GO:0009201	ribonucleoside triphosphate biosynthetic process	17/1119	118/18888	0.144068	2.43177	3.91514	0.000580642	0.0166876	0.0149197	ENO1/IMPDH2/ATP5F1B/NDUFV3/NME7/NDUFA2/ATP5MC1/NDUFA1/NDUFAB1/ATP5ME/CTPS2/PID1/NDUFS1/NDUFV2/NDUFA6/NME2/NDUFA10	17
GO:0009168	purine ribonucleoside monophosphate biosynthetic process	6/1119	19/18888	0.315789	5.33032	4.73901	0.000593117	0.0169481	0.0151526	IMPDH2/ADK/PPAT/PAICS/AMPD2/ATIC	6
GO:0046031	ADP metabolic process	15/1119	98/18888	0.153061	2.58357	3.94415	0.000629502	0.017885	0.0159903	HK2/DDIT4/ENO1/ENO2/HK1/PRKACA/PKM/PFKP/FOXK1/COL6A1/MLXIPL/GPI/ADPGK/RPTOR/MTOR	15
GO:0009126	purine nucleoside monophosphate metabolic process	9/1119	42/18888	0.214286	3.617	4.26074	0.000657605	0.0184724	0.0165154	GUK1/DGUOK/IMPDH2/ADK/CASK/PPAT/PAICS/AMPD2/ATIC	9
GO:0072595	maintenance of protein localization in organelle	9/1119	42/18888	0.214286	3.617	4.26074	0.000657605	0.0184724	0.0165154	HK2/KDELR2/HK1/RER1/HSPA5/ARL2BP/BBS4/HNRNPU/INSIG2	9
GO:0010506	regulation of autophagy	37/1119	357/18888	0.103641	1.7494	3.58727	0.000680619	0.0190115	0.0169974	DDIT3/CDK16/BNIP3L/SESN1/NPRL2/SESN2/PRKACA/GOLGA2/TFEB/USP36/TRIM23/EEF1A2/ATP6V0B/KEAP1/FOXK1/VDAC1/USP10/DAPK3/TOM1/C9orf72/HAX1/TMEM39A/ATG13/SLC7A5/ATG101/WIPI1/CLEC16A/SPTLC1/RPTOR/MTOR/SVIP/ATM/RAB3GAP2/BAG3/SEC22B/ATP6V0A1/PIK3C2A	37
GO:0034198	cellular response to amino acid starvation	10/1119	51/18888	0.196078	3.30968	4.14472	0.000705825	0.0193851	0.0173314	CDKN1A/SESN1/NPRL2/SESN2/TFEB/RNF167/EIF2AK3/EIF2AK4/EIF2S1/MTOR	10
GO:0019362	pyridine nucleotide metabolic process	21/1119	164/18888	0.128049	2.16138	3.74854	0.000706707	0.0193851	0.0173314	HK2/DDIT4/ENO1/ENO2/HK1/PRKACA/PKM/PFKP/MDH1/NOCT/NADK2/FOXK1/COL6A1/MLXIPL/GPI/ME2/ADPGK/RPTOR/MTOR/IDH2/MDH2	21
GO:0046496	nicotinamide nucleotide metabolic process	21/1119	164/18888	0.128049	2.16138	3.74854	0.000706707	0.0193851	0.0173314	HK2/DDIT4/ENO1/ENO2/HK1/PRKACA/PKM/PFKP/MDH1/NOCT/NADK2/FOXK1/COL6A1/MLXIPL/GPI/ME2/ADPGK/RPTOR/MTOR/IDH2/MDH2	21
GO:0022618	protein-RNA complex assembly	27/1119	234/18888	0.115385	1.94762	3.66033	0.00070959	0.0193851	0.0173314	NUDT21/LSM4/XAB2/PPAN/EIF3J/DDX42/EIF3B/KHDC4/SF3A3/SART1/HSP90AB1/EIF3L/SNRPD2/SF3B2/PRPF19/EIF3M/SNRPA1/RPF2/RUVBL1/SF3B5/TSSC4/ATM/FASTKD2/SFSWAP/PRPF8/HTATSF1/EIF3D	27
GO:0006094	gluconeogenesis	14/1119	89/18888	0.157303	2.65518	3.9277	0.000714307	0.0194073	0.0173513	ENO1/ENO2/SESN2/PRKACA/MDH1/SELENOS/PGP/CRY1/SDHAF3/GPI/GOT1/DDB1/PPP4R3B/MDH2	14
GO:0006007	glucose catabolic process	7/1119	27/18888	0.259259	4.37613	4.40538	0.000782673	0.0205287	0.0183539	HK2/ENO1/ENO2/HK1/PKM/PFKP/FOXK1	7
GO:0042026	protein refolding	7/1119	27/18888	0.259259	4.37613	4.40538	0.000782673	0.0205287	0.0183539	CRYAB/HSPD1/HSPA9/HSPA13/HSPA5/BAG5/HSPA1A	7
GO:0046037	GMP metabolic process	7/1119	27/18888	0.259259	4.37613	4.40538	0.000782673	0.0205287	0.0183539	GUK1/IMPDH2/ADK/CASK/PPAT/PAICS/ATIC	7
GO:0070861	regulation of protein exit from endoplasmic reticulum	7/1119	27/18888	0.259259	4.37613	4.40538	0.000782673	0.0205287	0.0183539	SAR1B/EDEM1/SVIP/EDEM2/DERL3/ERLEC1/GCC2	7
GO:0071480	cellular response to gamma radiation	7/1119	27/18888	0.259259	4.37613	4.40538	0.000782673	0.0205287	0.0183539	CDKN1A/CRYAB/WRN/MDM2/XRCC6/GTF2H5/ATM	7
GO:0031667	response to nutrient levels	47/1119	490/18888	0.0959184	1.61904	3.48415	0.000783184	0.0205287	0.0183539	MAP1LC3B/DDIT3/IGFBP2/MFSD2A/CDKN1A/SLC2A1/XBP1/SFRP1/WDR45B/APOE/SESN1/NPRL2/SESN2/MYBBP1A/TFEB/PRKAB1/SEC13/RNF167/WRN/HSPA5/EIF2AK3/FOXK1/BAX/COL6A1/FADS1/MDM2/BBS4/EIF2AK4/PEX2/EIF2S1/MLXIPL/SLC7A5/FBXO22/APAF1/WIPI1/ACE/CLEC16A/RPTOR/MTOR/ASS1/JMY/ALPL/GABARAP/NENF/TBL2/LRP11/UPP1	47
GO:0007007	inner mitochondrial membrane organization	9/1119	43/18888	0.209302	3.53289	4.1727	0.000788541	0.0205287	0.0183539	HSPA9/GHITM/TMEM11/TOMM70/TIMM8B/TIMM10B/APOO/CHCHD6/IMMT	9
GO:0072331	signal transduction by p53 class mediator	22/1119	177/18888	0.124294	2.098	3.68303	0.000801392	0.0205287	0.0183539	PSMD10/DDIT4/CDKN1A/AEN/SESN2/MYBBP1A/PAK1IP1/NDRG1/BAX/USP10/MIF/MDM2/PIP4P1/RRM2B/MLF1/MDM4/RPF2/MTOR/JMY/ATM/KAT6A/HIPK1	22
GO:0002097	tRNA wobble base modification	6/1119	20/18888	0.3	5.06381	4.563	0.00080513	0.0205287	0.0183539	ELP4/ELP2/CTU2/ELP1/DPH3/ELP3	6
GO:0030150	protein import into mitochondrial matrix	6/1119	20/18888	0.3	5.06381	4.563	0.00080513	0.0205287	0.0183539	TOMM40/TOMM7/TOMM70/PAM16/TOMM20/TIMM21	6
GO:0055070	copper ion homeostasis	6/1119	20/18888	0.3	5.06381	4.563	0.00080513	0.0205287	0.0183539	ARF1/ABCB6/SLC31A1/PRNP/ATOX1/CUTC	6
GO:1902236	negative regulation of endoplasmic reticulum stress-induced intrinsic apoptotic signaling pathway	6/1119	20/18888	0.3	5.06381	4.563	0.00080513	0.0205287	0.0183539	XBP1/HERPUD1/SELENOS/CREB3/HYOU1/HSPA1A	6
GO:0006383	transcription by RNA polymerase III	11/1119	61/18888	0.180328	3.04382	4.01219	0.00081554	0.0206881	0.0184964	POLR3D/MYBBP1A/BRF2/SETD5/DDX21/SNAPC2/RPTOR/POLR3E/MTOR/IVNS1ABP/MAF1	11
GO:0061136	regulation of proteasomal protein catabolic process	23/1119	189/18888	0.121693	2.0541	3.65485	0.00082824	0.0209036	0.0186891	PSMD10/USP9X/TMF1/HERPUD1/APOE/SGTA/PRKACA/DDRGK1/CLU/CAMLG/BAG5/KEAP1/ZER1/MDM2/USP14/HSP90AB1/FBXO22/HSPA1A/ZFAND2A/SVIP/GABARAP/UCHL5/FBXW8	23
GO:0010906	regulation of glucose metabolic process	15/1119	101/18888	0.148515	2.50684	3.81033	0.000868711	0.0218143	0.0195033	PDK3/SESN2/PRKACA/SELENOS/GNB3/FOXK1/LCMT1/PGP/ADIPOR1/CRY1/SDHAF3/DDB1/PPP4R3B/IRS2/PHKG2	15
GO:1904029	regulation of cyclin-dependent protein kinase activity	13/1119	81/18888	0.160494	2.70903	3.8681	0.00090149	0.0223846	0.0200132	PSMD10/CDKN1A/CCNK/CCNI/CCNG1/TTBK1/GADD45A/HSP90AB1/GTPBP4/CCNT1/BCCIP/LATS2/MEN1	13
GO:0009206	purine ribonucleoside triphosphate biosynthetic process	16/1119	112/18888	0.142857	2.41134	3.75927	0.000913423	0.0223846	0.0200132	ENO1/IMPDH2/ATP5F1B/NDUFV3/NME7/NDUFA2/ATP5MC1/NDUFA1/NDUFAB1/ATP5ME/PID1/NDUFS1/NDUFV2/NDUFA6/NME2/NDUFA10	16
GO:0006177	GMP biosynthetic process	5/1119	14/18888	0.357143	6.02834	4.72304	0.000922938	0.0223846	0.0200132	IMPDH2/ADK/PPAT/PAICS/ATIC	5
GO:0009263	deoxyribonucleotide biosynthetic process	5/1119	14/18888	0.357143	6.02834	4.72304	0.000922938	0.0223846	0.0200132	GUK1/DGUOK/ADK/RRM2B/TBPL1	5
GO:0009265	2'-deoxyribonucleotide biosynthetic process	5/1119	14/18888	0.357143	6.02834	4.72304	0.000922938	0.0223846	0.0200132	GUK1/DGUOK/ADK/RRM2B/TBPL1	5
GO:0046385	deoxyribose phosphate biosynthetic process	5/1119	14/18888	0.357143	6.02834	4.72304	0.000922938	0.0223846	0.0200132	GUK1/DGUOK/ADK/RRM2B/TBPL1	5
GO:1904152	regulation of retrograde protein transport, ER to cytosol	5/1119	14/18888	0.357143	6.02834	4.72304	0.000922938	0.0223846	0.0200132	EDEM1/SVIP/EDEM2/DERL3/ERLEC1	5
GO:0048545	response to steroid hormone	35/1119	338/18888	0.10355	1.74786	3.48155	0.000952086	0.0229795	0.020545	DDIT4/PER1/IGFBP2/KDM3A/CDKN1A/TMF1/HMGB2/NEFL/UFM1/SFRP1/PTPRU/DDRGK1/CNOT9/RBBP7/TXNIP/SAFB2/CRY2/ATP1A3/MDM2/HNRNPU/CRY1/ZMIZ1/NR1H3/GPI/SAFB/GOT1/HSPA1A/FOSB/ACE/FOSL2/ASS1/ALPL/JAK2/PAGR1/ERRFI1	35
GO:0000470	maturation of LSU-rRNA	7/1119	28/18888	0.25	4.21984	4.27866	0.000990751	0.0237972	0.0212761	PES1/DDX18/NHP2/GTPBP4/RPF2/NSA2/URB1	7
GO:0019319	hexose biosynthetic process	14/1119	92/18888	0.152174	2.5686	3.78476	0.000999974	0.0239032	0.0213709	ENO1/ENO2/SESN2/PRKACA/MDH1/SELENOS/PGP/CRY1/SDHAF3/GPI/GOT1/DDB1/PPP4R3B/MDH2	14
GO:0016075	rRNA catabolic process	6/1119	21/18888	0.285714	4.82267	4.39836	0.00107114	0.0254818	0.0227823	DEDD2/ZCCHC7/DIS3/EXOSC7/EXOSC5/DDX49	6
GO:0090307	mitotic spindle assembly	12/1119	73/18888	0.164384	2.77469	3.81238	0.0011308	0.0267731	0.0239368	CHMP2A/GOLGA2/CEP192/MZT1/CHMP2B/HNRNPU/MAP9/WRAP73/HSPA1A/AAAS/BCCIP/CHMP5	12
GO:0009408	response to heat	15/1119	104/18888	0.144231	2.43452	3.68125	0.00118073	0.0278228	0.0248752	CDKN1A/PRKACA/CRYAB/RBBP7/DNAJA3/EIF2B1/EIF2B2/EIF2S1/HSP90AB1/HSPA1A/MTOR/DNAJB4/ATM/BAG3/LRP11	15
GO:0051084	'de novo' post-translational protein folding	8/1119	37/18888	0.216216	3.64959	4.04834	0.00122398	0.0287058	0.0256647	ERO1A/HSPA9/HSPA13/HSPA5/SELENOF/HSPA1A/DNAJB4/HSPH1	8
GO:0061025	membrane fusion	22/1119	183/18888	0.120219	2.02921	3.51089	0.00124846	0.0291425	0.0260551	VAMP2/NAPA/SEC22A/BET1L/CHMP2A/YKT6/GOSR2/ANXA2/SYT4/STX5/YIPF5/TOM1/CHMP2B/RAB3A/YIPF4/CTSL/STX3/NAPG/SEC22B/USO1/SYT9/CHMP5	22
GO:0042273	ribosomal large subunit biogenesis	12/1119	74/18888	0.162162	2.73719	3.75741	0.0012783	0.0295019	0.0263765	PES1/PAK1IP1/EBNA1BP2/DDX18/NHP2/PPAN/WDR74/GTPBP4/RPF2/NSA2/FASTKD2/URB1	12
GO:0033157	regulation of intracellular protein transport	19/1119	149/18888	0.127517	2.1524	3.54396	0.00130445	0.0295019	0.0263765	UFM1/VAMP2/EMD/PRKACA/NUP58/OAZ1/MDM2/ZFAND1/SAR1B/EDEM1/NDEL1/SVIP/EDEM2/BAG3/JAK2/DERL3/ANP32B/ERLEC1/GCC2	19
GO:0009266	response to temperature stimulus	21/1119	172/18888	0.122093	2.06085	3.50734	0.00130984	0.0295019	0.0263765	CDKN1A/DNAJC3/ERO1A/PRKACA/CRYAB/RBBP7/HSPD1/EIF2AK3/ALDH18A1/DNAJA3/EIF2B1/EIF2AK4/EIF2B2/EIF2S1/HSP90AB1/HSPA1A/MTOR/DNAJB4/ATM/BAG3/LRP11	21
GO:0051205	protein insertion into membrane	9/1119	46/18888	0.195652	3.30248	3.92353	0.00131337	0.0295019	0.0263765	SEC61A1/TMCO1/SGTA/CCDC47/CAMLG/BAX/EMC6/EMC3/TRAM1	9
GO:0170036	import into the mitochondrion	9/1119	46/18888	0.195652	3.30248	3.92353	0.00131337	0.0295019	0.0263765	TOMM40/TOMM7/TOMM70/SLC25A32/PAM16/VDAC1/TOMM20/TIMM21/SFXN1	9
GO:0001732	formation of cytoplasmic translation initiation complex	5/1119	15/18888	0.333333	5.62645	4.49819	0.00131726	0.0295019	0.0263765	EIF3J/EIF3B/EIF3L/EIF3M/EIF3D	5
GO:0006271	DNA strand elongation involved in DNA replication	5/1119	15/18888	0.333333	5.62645	4.49819	0.00131726	0.0295019	0.0263765	POLE3/POLD3/RFC4/POLD2/POLA1	5
GO:0043558	regulation of translational initiation in response to stress	5/1119	15/18888	0.333333	5.62645	4.49819	0.00131726	0.0295019	0.0263765	DNAJC3/EIF2AK3/EIF2AK4/EIF2S1/NCK1	5
GO:0098760	response to interleukin-7	5/1119	15/18888	0.333333	5.62645	4.49819	0.00131726	0.0295019	0.0263765	P4HB/HSPD1/ATP5F1B/FOSL2/ATIC	5
GO:0032868	response to insulin	29/1119	269/18888	0.107807	1.81971	3.39799	0.00135759	0.0302687	0.027062	SYAP1/PAX6/SLC2A1/XBP1/VAMP2/LONP1/SESN2/PKM/SELENOS/ADIPOR1/CRY2/COL6A1/SRSF4/APPL1/CRY1/PID1/GOT1/MTOR/NCL/IRS2/NDEL1/WDTC1/ALPL/USO1/INSIG2/NCK1/CPEB1/PIK3C2A/ERRFI1	29
GO:0043555	regulation of translation in response to stress	6/1119	22/18888	0.272727	4.60346	4.24381	0.00139968	0.0309298	0.0276531	DNAJC3/SESN2/EIF2AK3/EIF2AK4/EIF2S1/NCK1	6
GO:0045947	negative regulation of translational initiation	6/1119	22/18888	0.272727	4.60346	4.24381	0.00139968	0.0309298	0.0276531	ZNF598/EIF2AK3/EIF2AK4/EIF2S1/PAIP2B/EIF4EBP1	6
GO:0016485	protein processing	27/1119	245/18888	0.110204	1.86017	3.40076	0.00141682	0.0311701	0.0278679	HM13/P4HB/ENO1/ATP6AP2/PRKACA/SPCS1/ANXA2/LGMN/SPG7/ASPH/SLC30A5/ATG4A/TMEM208/YIPF5/MDM2/CTSL/SEC11C/ACE/PITRM1/ADAMTS2/GGT1/PRNP/TBC1D10A/IMMP1L/IFT172/IFT52/CAST	27
GO:0006979	response to oxidative stress	39/1119	398/18888	0.0979899	1.65401	3.30918	0.0014316	0.0313564	0.0280345	HM13/GPX4/TRAP1/LONP1/ERO1A/APOE/PRDX4/SESN1/SESN2/PTPRN/CRYAB/SELENOS/TXNIP/WRN/PRDX6/KEAP1/BRF2/GSTP1/SELENOK/PPP1R15B/BANF1/COL6A1/FBLN5/MDM2/BTG1/PEX2/OSER1/EIF2S1/RRM2B/PXN/HSPA1A/ARL6IP5/NDUFA6/PRNP/NME2/ATOX1/ATM/JAK2/OXSR1	39
GO:0046394	carboxylic acid biosynthetic process	34/1119	334/18888	0.101796	1.71826	3.32353	0.00149331	0.0325647	0.0291148	SCD/GPX4/OSBPL2/XBP1/SEPHS2/MGST3/ELOVL5/BCAT1/PRKAB1/PTGES2/ALDH18A1/ILVBL/GSTP1/NDUFAB1/FADS1/MIF/RDH10/SERINC3/NR1H3/MLXIPL/GOT1/UST/AKR1A1/GGT1/WDTC1/ASS1/SHMT2/INSIG2/PHGDH/OSBP/OSBPL9/SLC38A1/MTRR/ERRFI1	34
GO:0006359	regulation of transcription by RNA polymerase III	7/1119	30/18888	0.233333	3.93852	4.04209	0.00153566	0.033342	0.0298097	MYBBP1A/BRF2/SETD5/DDX21/RPTOR/MTOR/MAF1	7
GO:1902115	regulation of organelle assembly	25/1119	223/18888	0.112108	1.8923	3.36369	0.00164727	0.0356097	0.0318372	ARF4/CHMP2A/PDCD6IP/USP10/BBS4/CHMP2B/C9orf72/CRIPT/HNRNPU/TMEM39A/WRAP73/HSPA1A/CENPJ/IFT20/DYNC2LI1/WIPI1/MSN/ALMS1/MTOR/RAB3GAP2/SEC22B/CHMP5/DYNLL1/SEPTIN7/UBAP2L	25
GO:0042176	regulation of protein catabolic process	36/1119	362/18888	0.0994475	1.67861	3.27151	0.00166013	0.0357322	0.0319467	PSMD10/USP9X/TIMP1/TMF1/HERPUD1/APOE/SGTA/PRKACA/DDRGK1/ANXA2/EEF1A2/CLU/CAMLG/BAG5/KEAP1/OAZ1/STX5/ATRAID/ZER1/MDM2/USP14/LAPTM4B/HSP90AB1/PSMD3/FBXO22/HSPA1A/DDB1/ZFAND2A/MDM4/MSN/SVIP/GABARAP/UCHL5/SEC22B/NRDC/FBXW8	36
GO:0016053	organic acid biosynthetic process	34/1119	337/18888	0.10089	1.70296	3.26759	0.00173428	0.0371674	0.0332299	SCD/GPX4/OSBPL2/XBP1/SEPHS2/MGST3/ELOVL5/BCAT1/PRKAB1/PTGES2/ALDH18A1/ILVBL/GSTP1/NDUFAB1/FADS1/MIF/RDH10/SERINC3/NR1H3/MLXIPL/GOT1/UST/AKR1A1/GGT1/WDTC1/ASS1/SHMT2/INSIG2/PHGDH/OSBP/OSBPL9/SLC38A1/MTRR/ERRFI1	34
GO:0006906	vesicle fusion	16/1119	119/18888	0.134454	2.26949	3.48617	0.00175411	0.0374311	0.0334656	VAMP2/CHMP2A/GOSR2/ANXA2/SYT4/STX5/YIPF5/TOM1/CHMP2B/RAB3A/YIPF4/STX3/SEC22B/USO1/SYT9/CHMP5	16
GO:0042770	signal transduction in response to DNA damage	22/1119	188/18888	0.117021	1.97524	3.37238	0.00177036	0.0376164	0.0336313	PSMD10/CDKN1A/SESN2/NDRG1/CCNG1/DONSON/XPC/USP10/CEP63/MIF/MDM2/TOPBP1/GADD45A/EIF2AK4/CRY1/TIPRL/MRNIP/PRPF19/MDM4/ATM/RINT1/HINFP	22
GO:0071985	multivesicular body sorting pathway	9/1119	48/18888	0.1875	3.16488	3.76859	0.00179793	0.0380396	0.0340096	CHMP2A/TMEM50B/PDCD6IP/STAM2/CHMP2B/LEPROTL1/LAPTM4B/CHMP5/RAB27A	9
GO:0000463	maturation of LSU-rRNA from tricistronic rRNA transcript (SSU-rRNA, 5.8S rRNA, LSU-rRNA)	5/1119	16/18888	0.3125	5.2748	4.29271	0.00182324	0.0382495	0.0341973	PES1/DDX18/GTPBP4/RPF2/URB1	5
GO:0016074	sno(s)RNA metabolic process	5/1119	16/18888	0.3125	5.2748	4.29271	0.00182324	0.0382495	0.0341973	ZCCHC7/PARN/EXOSC5/NUDT16/RNF113A	5
GO:0070198	protein localization to chromosome, telomeric region	7/1119	31/18888	0.225806	3.81147	3.93136	0.00188349	0.0393475	0.035179	GNL3/NABP2/TNKS2/TCP1/TERF2/TERF2IP/CCT6A	7
GO:1990253	cellular response to leucine starvation	4/1119	10/18888	0.4	6.75174	4.56548	0.00192831	0.0401154	0.0358655	SESN1/SESN2/RNF167/MTOR	4
GO:0016073	snRNA metabolic process	10/1119	58/18888	0.172414	2.91023	3.65629	0.00198051	0.0408593	0.0365306	ZCCHC7/USPL1/TUT1/INTS8/NHP2/INTS10/SNAPC2/EXOSC7/EXOSC5/INTS4	10
GO:0032786	positive regulation of DNA-templated transcription, elongation	10/1119	58/18888	0.172414	2.91023	3.65629	0.00198051	0.0408593	0.0365306	MED8/CCNK/MED10/MED14/TCERG1/GTF2F1/MED29/MED4/NCBP2/CCNT1	10
GO:2001242	regulation of intrinsic apoptotic signaling pathway	22/1119	190/18888	0.115789	1.95445	3.31817	0.00202591	0.0416231	0.0372136	DDIT3/P4HB/XBP1/ENO1/TRAP1/HERPUD1/BBC3/SELENOS/CLU/CREB3/HYOU1/EIF2AK3/BAG5/BAX/MIF/MDM2/SERINC3/RRM2B/HSPA1A/VDAC2/IVNS1ABP/NCK1	22
GO:0006919	activation of cysteine-type endopeptidase activity involved in apoptotic process	11/1119	68/18888	0.161765	2.73048	3.58738	0.00204946	0.0419338	0.0374913	FAM162A/BBC3/HSPD1/BCL2L13/MTCH1/EIF2AK3/BAX/CYCS/APAF1/JAK2/ANP32B	11
GO:0009167	purine ribonucleoside monophosphate metabolic process	8/1119	40/18888	0.2	3.37587	3.77472	0.00208281	0.0423886	0.037898	GUK1/IMPDH2/ADK/CASK/PPAT/PAICS/AMPD2/ATIC	8
GO:0090174	organelle membrane fusion	16/1119	121/18888	0.132231	2.23198	3.41165	0.00208874	0.0423886	0.037898	VAMP2/CHMP2A/GOSR2/ANXA2/SYT4/STX5/YIPF5/TOM1/CHMP2B/RAB3A/YIPF4/STX3/SEC22B/USO1/SYT9/CHMP5	16
GO:0051085	chaperone cofactor-dependent protein refolding	7/1119	32/18888	0.21875	3.69236	3.82515	0.00228936	0.046168	0.0412769	ERO1A/HSPA9/HSPA13/HSPA5/HSPA1A/DNAJB4/HSPH1	7
GO:0009451	RNA modification	21/1119	180/18888	0.116667	1.96926	3.27889	0.00230784	0.046168	0.0412769	ALKBH5/TRMT112/RNMT/ELP4/ELP2/BUD23/NHP2/DALRD3/THUMPD3/PARN/EMG1/CTU2/SNRPD2/RBM33/ELP1/GON7/TRMT1L/DPH3/PUSL1/ELP3/TRMT10A	21
GO:1901607	alpha-amino acid biosynthetic process	11/1119	69/18888	0.15942	2.69091	3.53112	0.00231033	0.046168	0.0412769	SEPHS2/BCAT1/ALDH18A1/ILVBL/SERINC3/GOT1/GGT1/ASS1/SHMT2/PHGDH/MTRR	11
GO:0071897	DNA biosynthetic process	22/1119	192/18888	0.114583	1.93409	3.26461	0.00231211	0.046168	0.0412769	CDKN1A/POLE3/HNRNPC/WRN/NHP2/POLD3/TNKS2/POLI/RFC4/USP10/PARN/TCP1/HNRNPU/TERF2/RRM2B/HSP90AB1/POLD2/TERF2IP/POLA1/ATM/CCT6A/MEN1	22
GO:0007623	circadian rhythm	23/1119	205/18888	0.112195	1.89378	3.22887	0.0024489	0.0486909	0.0435326	USP9X/PER1/GFPT1/ATF5/BHLHE40/MYBBP1A/IMPDH2/NOCT/NFIL3/CRY2/COL6A1/THRAP3/HNRNPU/CRY1/NR1H3/PIWIL2/SIAH2/KMT2A/DDB1/MTOR/ASS1/PPP1CB/ZFHX3	23
GO:0006878	intracellular copper ion homeostasis	5/1119	17/18888	0.294118	4.96452	4.10376	0.00245805	0.0486909	0.0435326	ARF1/ABCB6/SLC31A1/PRNP/ATOX1	5

## Sheet: WT_Mig_UPvsHET_Mig_Down_Enrich
Enrichment FDR	nGenes	Pathway Genes	Fold Enrichment	Pathway	URL	Genes
4.04455e-07	5	37	122.625	GO:0007214 Gamma-aminobutyric acid signaling pathway	https://amigo.geneontology.org/amigo/term/GO:0007214	GABRA2 GABRG1 GABRG3 GABBR1 GABRB2
4.04455e-07	7	160	35.519	GO:0060078 Regulation of postsynaptic membrane potential	https://amigo.geneontology.org/amigo/term/GO:0060078	GABRA2 GABRG1 GABRG3 GRIK5 GABRB2 GRIK2 GABBR1
6.76633e-06	5	70	60.3074	GO:0051932 Synaptic transmission gabaergic	https://amigo.geneontology.org/amigo/term/GO:0051932	GABRA2 GABRG1 GABRG3 GABRB2 GABBR1
1.36091e-05	4	30	109	GO:1904862 Inhibitory synapse assembly	https://amigo.geneontology.org/amigo/term/GO:1904862	GABRA2 GABRG1 GABRG3 GABRB2
1.69547e-05	4	36	98.1	GO:0099505 Regulation of presynaptic membrane potential	https://amigo.geneontology.org/amigo/term/GO:0099505	GRIK5 GABRA2 GRIK2 GABBR1
0.000300225	7	479	11.5476	GO:0042391 Regulation of membrane potential	https://amigo.geneontology.org/amigo/term/GO:0042391	GABRA2 GABRG1 GABRG3 GRIK5 GABRB2 GRIK2 GABBR1
0.000475004	8	824	7.95405	GO:0007268 Chemical synaptic transmission	https://amigo.geneontology.org/amigo/term/GO:0007268	GRIK5 GABRA2 GABRG1 GRIK2 GABRG3 PTN GABBR1 GABRB2
0.000475004	5	176	21.6397	GO:0061351 Neural precursor cell proliferation	https://amigo.geneontology.org/amigo/term/GO:0061351	FZD3 PTN MDK GBX2 ID4
0.000475004	8	824	7.95405	GO:0098916 Anterograde trans-synaptic signaling	https://amigo.geneontology.org/amigo/term/GO:0098916	GRIK5 GABRA2 GABRG1 GRIK2 GABRG3 PTN GABBR1 GABRB2
0.000475004	8	830	7.89008	GO:0099537 Trans-synaptic signaling	https://amigo.geneontology.org/amigo/term/GO:0099537	GRIK5 GABRA2 GABRG1 GRIK2 GABRG3 PTN GABBR1 GABRB2
0.000498588	13	2764	3.84435	GO:0007399 Nervous system development	https://amigo.geneontology.org/amigo/term/GO:0007399	CKB GABRA2 GABRG1 GBX2 GAP43 GABRG3 PTN MDK GABRB2 ROBO1 FZD3 ID4 GPC1
0.000535104	8	871	7.57529	GO:0099536 Synaptic signaling	https://amigo.geneontology.org/amigo/term/GO:0099536	GRIK5 GABRA2 GABRG1 GRIK2 GABRG3 PTN GABBR1 GABRB2
0.000897953	3	34	71.2016	GO:0010996 Response to auditory stimulus	https://amigo.geneontology.org/amigo/term/GO:0010996	PTN MDK GAP43
0.000914297	4	108	28.5728	GO:2000177 Regulation of neural precursor cell proliferation	https://amigo.geneontology.org/amigo/term/GO:2000177	FZD3 PTN MDK ID4
0.00106792	4	127	27	GO:1902476 Chloride transmembrane transport	https://amigo.geneontology.org/amigo/term/GO:1902476	GABRB2 GABRA2 GABRG1 GABRG3
0.00110928	5	257	15.4569	GO:0050769 Positive regulation of neurogenesis	https://amigo.geneontology.org/amigo/term/GO:0050769	PTN MDK ROBO1 FZD3 ID4
0.00124353	4	144	23.7339	GO:0006821 Chloride transport	https://amigo.geneontology.org/amigo/term/GO:0006821	GABRB2 GABRA2 GABRG1 GABRG3
0.00124353	5	276	14.5982	GO:0007416 Synapse assembly	https://amigo.geneontology.org/amigo/term/GO:0007416	GABRA2 GABRG1 GABRG3 GABRB2 GAP43
0.00124353	5	284	14.2587	GO:0010001 Glial cell differentiation	https://amigo.geneontology.org/amigo/term/GO:0010001	PTN MDK GAP43 ID4 GPC1
0.00124353	15	4287	2.8488	GO:0048731 System development	https://amigo.geneontology.org/amigo/term/GO:0048731	CKB GABRA2 GABRG1 GBX2 GAP43 GABRG3 PTN MDK GABRB2 ROBO1 FZD3 ID4 CADM1 DKK3 GPC1
0.00124353	6	475	10.0102	GO:0048732 Gland development	https://amigo.geneontology.org/amigo/term/GO:0048732	PTN MDK ID4 CADM1 DKK3 ROBO1
0.00124353	6	478	9.92022	GO:0051960 Regulation of nervous system development	https://amigo.geneontology.org/amigo/term/GO:0051960	GBX2 PTN MDK ROBO1 FZD3 ID4
0.00127284	4	148	23.1732	GO:0098661 Inorganic anion transmembrane transport	https://amigo.geneontology.org/amigo/term/GO:0098661	GABRB2 GABRA2 GABRG1 GABRG3
0.00165516	8	1121	5.86255	GO:0007417 Central nervous system development	https://amigo.geneontology.org/amigo/term/GO:0007417	CKB PTN MDK ROBO1 FZD3 GBX2 GAP43 ID4
0.00165516	2	7	210.214	GO:0016198 Axon choice point recognition	https://amigo.geneontology.org/amigo/term/GO:0016198	GAP43 ROBO1
0.00165516	3	48	46.9628	GO:0048713 Regulation of oligodendrocyte differentiation	https://amigo.geneontology.org/amigo/term/GO:0048713	PTN MDK ID4
0.00165516	5	310	12.8179	GO:0051962 Positive regulation of nervous system development	https://amigo.geneontology.org/amigo/term/GO:0051962	PTN MDK ROBO1 FZD3 ID4
0.00171137	4	167	20.4375	GO:0098656 Monoatomic anion transmembrane transport	https://amigo.geneontology.org/amigo/term/GO:0098656	GABRB2 GABRA2 GABRG1 GABRG3
0.00198848	2	9	183.938	GO:0002232 Leukocyte chemotaxis involved in inflammatory response	https://amigo.geneontology.org/amigo/term/GO:0002232	PTN MDK
0.00198848	3	54	41.6462	GO:1902692 Regulation of neuroblast proliferation	https://amigo.geneontology.org/amigo/term/GO:1902692	FZD3 PTN ID4
0.00269081	4	189	17.7289	GO:0015698 Inorganic anion transport	https://amigo.geneontology.org/amigo/term/GO:0015698	GABRB2 GABRA2 GABRG1 GABRG3
0.00279453	4	194	17.4142	GO:0006820 Monoatomic anion transport	https://amigo.geneontology.org/amigo/term/GO:0006820	GABRB2 GABRA2 GABRG1 GABRG3
0.00303183	5	385	10.694	GO:0042063 Gliogenesis	https://amigo.geneontology.org/amigo/term/GO:0042063	PTN MDK GAP43 ID4 GPC1
0.00303183	3	66	35.0357	GO:2000179 Positive regulation of neural precursor cell proliferation	https://amigo.geneontology.org/amigo/term/GO:2000179	FZD3 MDK ID4
0.003333	2	11	133.773	GO:2000347 Positive regulation of hepatocyte proliferation	https://amigo.geneontology.org/amigo/term/GO:2000347	PTN MDK
0.00393309	5	396	9.9966	GO:0050767 Regulation of neurogenesis	https://amigo.geneontology.org/amigo/term/GO:0050767	PTN MDK ROBO1 FZD3 ID4
0.00455709	3	78	29.43	GO:0045685 Regulation of glial cell differentiation	https://amigo.geneontology.org/amigo/term/GO:0045685	PTN MDK ID4
0.00479824	3	83	28.6656	GO:0042246 Tissue regeneration	https://amigo.geneontology.org/amigo/term/GO:0042246	GAP43 PTN MDK
0.00543361	3	83	27.25	GO:0007405 Neuroblast proliferation	https://amigo.geneontology.org/amigo/term/GO:0007405	FZD3 PTN ID4
0.00602409	8	1460	4.55573	GO:0007267 Cell-cell signaling	https://amigo.geneontology.org/amigo/term/GO:0007267	GRIK5 GABRA2 GABRG1 GRIK2 GABRG3 GABBR1 GABRB2 PTN
0.00602409	6	699	6.69879	GO:0048858 Cell projection morphogenesis	https://amigo.geneontology.org/amigo/term/GO:0048858	GAP43 ROBO1 FZD3 PTN MDK GBX2
0.00603489	2	16	91.9688	GO:0044849 Estrous cycle	https://amigo.geneontology.org/amigo/term/GO:0044849	PTN MDK
0.00664415	4	244	12.7403	GO:0007411 Axon guidance	https://amigo.geneontology.org/amigo/term/GO:0007411	GAP43 FZD3 GBX2 ROBO1
0.00664415	9	1859	3.86333	GO:0022008 Neurogenesis	https://amigo.geneontology.org/amigo/term/GO:0022008	GAP43 PTN MDK ROBO1 FZD3 GABRB2 GBX2 ID4 GPC1
0.00664415	4	245	12.6853	GO:0097485 Neuron projection guidance	https://amigo.geneontology.org/amigo/term/GO:0097485	GAP43 FZD3 GBX2 ROBO1
0.00664415	2	17	86.5588	GO:2000345 Regulation of hepatocyte proliferation	https://amigo.geneontology.org/amigo/term/GO:2000345	PTN MDK
0.00713701	5	504	8.28547	GO:0010720 Positive regulation of cell development	https://amigo.geneontology.org/amigo/term/GO:0010720	PTN MDK ROBO1 FZD3 ID4
0.00713701	7	1135	5.10938	GO:0034220 Monoatomic ion transmembrane transport	https://amigo.geneontology.org/amigo/term/GO:0034220	GABRB2 GABRA2 GABRG1 GABRG3 GRIK5 GRIK2 MT-ND3
0.00731294	6	795	6.22638	GO:0007420 Brain development	https://amigo.geneontology.org/amigo/term/GO:0007420	CKB ROBO1 FZD3 MDK GBX2 ID4
0.00816801	8	1595	4.22238	GO:0010648 Negative regulation of cell communication	https://amigo.geneontology.org/amigo/term/GO:0010648	DKK3 GPC1 MDK LMBR1L GRIK2 CADM1 GABBR1 ROBO1
0.00816801	8	1594	4.22238	GO:0023057 Negative regulation of signaling	https://amigo.geneontology.org/amigo/term/GO:0023057	DKK3 GPC1 MDK LMBR1L GRIK2 CADM1 GABBR1 ROBO1
0.00817299	3	114	21.4296	GO:0014013 Regulation of gliogenesis	https://amigo.geneontology.org/amigo/term/GO:0014013	PTN MDK ID4
0.00817299	8	1516	4.19829	GO:0030182 Neuron differentiation	https://amigo.geneontology.org/amigo/term/GO:0030182	GAP43 MDK ROBO1 FZD3 PTN GABRB2 GBX2 ID4
0.00818012	2	22	70.0714	GO:0002523 Leukocyte migration involved in inflammatory response	https://amigo.geneontology.org/amigo/term/GO:0002523	PTN MDK
0.00852	3	111	20.8231	GO:0048709 Oligodendrocyte differentiation	https://amigo.geneontology.org/amigo/term/GO:0048709	PTN MDK ID4
0.00900496	2	23	63.9783	GO:0035235 Ionotropic glutamate receptor signaling pathway	https://amigo.geneontology.org/amigo/term/GO:0035235	GRIK5 GRIK2
0.00900496	6	848	5.81621	GO:0060322 Head development	https://amigo.geneontology.org/amigo/term/GO:0060322	CKB ROBO1 FZD3 MDK GBX2 ID4
0.00900496	2	25	63.9783	GO:0072574 Hepatocyte proliferation	https://amigo.geneontology.org/amigo/term/GO:0072574	PTN MDK
0.00900496	2	25	63.9783	GO:0072575 Epithelial cell proliferation involved in liver morphogenesis	https://amigo.geneontology.org/amigo/term/GO:0072575	PTN MDK
0.00915668	5	542	7.46197	GO:0034329 Cell junction assembly	https://amigo.geneontology.org/amigo/term/GO:0034329	GABRA2 GABRG1 GABRG3 GABRB2 GAP43
0.0101589	8	1604	3.96364	GO:0048699 Generation of neurons	https://amigo.geneontology.org/amigo/term/GO:0048699	GAP43 MDK ROBO1 FZD3 PTN GABRB2 GBX2 ID4
0.0101589	5	541	7.24163	GO:0061564 Axon development	https://amigo.geneontology.org/amigo/term/GO:0061564	GAP43 ROBO1 FZD3 GBX2 PTN
0.0101589	2	27	58.86	GO:0072576 Liver morphogenesis	https://amigo.geneontology.org/amigo/term/GO:0072576	PTN MDK
0.0108421	7	1233	4.54969	GO:0048666 Neuron development	https://amigo.geneontology.org/amigo/term/GO:0048666	GAP43 MDK ROBO1 FZD3 PTN GABRB2 GBX2
0.0113023	2	28	54.5	GO:0030325 Adrenal gland development	https://amigo.geneontology.org/amigo/term/GO:0030325	DKK3 MDK
0.0117678	3	133	17.5179	GO:0022612 Gland morphogenesis	https://amigo.geneontology.org/amigo/term/GO:0022612	PTN MDK ID4
0.0124607	2	29	50.7414	GO:0048714 Positive regulation of oligodendrocyte differentiation	https://amigo.geneontology.org/amigo/term/GO:0048714	PTN MDK
0.0124607	5	598	6.76241	GO:0050808 Synapse organization	https://amigo.geneontology.org/amigo/term/GO:0050808	GABRA2 GABRG1 GABRG3 GABRB2 GAP43
0.0124607	4	331	9.68092	GO:0060070 Canonical wnt signaling pathway	https://amigo.geneontology.org/amigo/term/GO:0060070	DKK3 FZD3 MDK LMBR1L
0.013316	6	954	5.17526	GO:0045597 Positive regulation of cell differentiation	https://amigo.geneontology.org/amigo/term/GO:0045597	PTN MDK ROBO1 GPC1 FZD3 ID4
0.013316	11	3229	2.75656	GO:0048513 Animal organ development	https://amigo.geneontology.org/amigo/term/GO:0048513	CKB ROBO1 GPC1 FZD3 PTN MDK GABRB2 GBX2 ID4 CADM1 DKK3
0.013316	3	144	16.35	GO:0090090 Negative regulation of canonical wnt signaling pathway	https://amigo.geneontology.org/amigo/term/GO:0090090	DKK3 MDK LMBR1L
0.0141621	2	37	45.9844	GO:0001569 Branching involved in blood vessel morphogenesis	https://amigo.geneontology.org/amigo/term/GO:0001569	GBX2 MDK
0.0148018	5	613	6.40897	GO:0048667 Cell morphogenesis involved in neuron differentiation	https://amigo.geneontology.org/amigo/term/GO:0048667	GAP43 ROBO1 FZD3 PTN GBX2
0.0148569	3	152	15.4353	GO:0001889 Liver development	https://amigo.geneontology.org/amigo/term/GO:0001889	PTN MDK CADM1
0.0148569	7	1393	4.19401	GO:0006811 Monoatomic ion transport	https://amigo.geneontology.org/amigo/term/GO:0006811	GABRB2 GABRA2 GABRG1 GABRG3 GRIK5 GRIK2 MT-ND3
0.0154665	3	155	15.1182	GO:0061008 Hepaticobiliary system development	https://amigo.geneontology.org/amigo/term/GO:0061008	PTN MDK CADM1
0.0167794	2	37	40.875	GO:1990806 Ligand-gated ion channel signaling pathway	https://amigo.geneontology.org/amigo/term/GO:1990806	GRIK5 GRIK2
0.0167862	5	651	6.14149	GO:0048729 Tissue morphogenesis	https://amigo.geneontology.org/amigo/term/GO:0048729	FZD3 GBX2 ID4 MDK ROBO1
0.0168494	2	38	39.7703	GO:0002052 Positive regulation of neuroblast proliferation	https://amigo.geneontology.org/amigo/term/GO:0002052	FZD3 ID4
0.0168494	3	163	14.2403	GO:0007272 Ensheathment of neurons	https://amigo.geneontology.org/amigo/term/GO:0007272	PTN ID4 GPC1
0.0168494	3	179	14.3328	GO:0008037 Cell recognition	https://amigo.geneontology.org/amigo/term/GO:0008037	GAP43 CADM1 ROBO1
0.0168494	3	163	14.2403	GO:0008366 Axon ensheathment	https://amigo.geneontology.org/amigo/term/GO:0008366	PTN ID4 GPC1
0.0168494	3	161	14.4265	GO:0042552 Myelination	https://amigo.geneontology.org/amigo/term/GO:0042552	PTN ID4 GPC1
0.0182449	3	205	13.7953	GO:0007156 Homophilic cell adhesion via plasma membrane adhesion molecules	https://amigo.geneontology.org/amigo/term/GO:0007156	CADM1 ROBO1 PCDH19
0.0202381	10	3099	2.78061	GO:0007166 Cell surface receptor signaling pathway	https://amigo.geneontology.org/amigo/term/GO:0007166	DKK3 GPC1 FZD3 PTN GRIK5 MDK LMBR1L GRIK2 ROBO1 CADM1
0.0202381	5	677	5.76607	GO:0048812 Neuron projection morphogenesis	https://amigo.geneontology.org/amigo/term/GO:0048812	GAP43 ROBO1 FZD3 PTN GBX2
0.0202742	3	178	13.1384	GO:0030178 Negative regulation of wnt signaling pathway	https://amigo.geneontology.org/amigo/term/GO:0030178	DKK3 MDK LMBR1L
0.020574	6	1039	4.56988	GO:0000902 Cell morphogenesis	https://amigo.geneontology.org/amigo/term/GO:0000902	GAP43 ROBO1 FZD3 PTN MDK GBX2
0.0207231	2	45	34.2209	GO:0001662 Behavioral fear response	https://amigo.geneontology.org/amigo/term/GO:0001662	MDK GRIK2
0.0210744	2	46	33.4432	GO:0002209 Behavioral defense response	https://amigo.geneontology.org/amigo/term/GO:0002209	MDK GRIK2
0.0210744	2	46	33.4432	GO:0045687 Positive regulation of glial cell differentiation	https://amigo.geneontology.org/amigo/term/GO:0045687	PTN MDK
0.0210744	5	694	5.625	GO:0120039 Plasma membrane bounded cell projection morphogenesis	https://amigo.geneontology.org/amigo/term/GO:0120039	GAP43 ROBO1 FZD3 PTN GBX2
0.0217168	2	46	32.7	GO:0048483 Autonomic nervous system development	https://amigo.geneontology.org/amigo/term/GO:0048483	FZD3 GBX2
0.0220908	6	1064	4.4501	GO:0031175 Neuron projection development	https://amigo.geneontology.org/amigo/term/GO:0031175	GAP43 MDK ROBO1 FZD3 PTN GBX2
0.0229416	2	49	31.3085	GO:0008038 Neuron recognition	https://amigo.geneontology.org/amigo/term/GO:0008038	GAP43 ROBO1
0.0229416	6	1086	4.4013	GO:0009887 Animal organ morphogenesis	https://amigo.geneontology.org/amigo/term/GO:0009887	FZD3 PTN MDK GBX2 ID4 ROBO1
0.0236751	2	51	30.6562	GO:0031103 Axon regeneration	https://amigo.geneontology.org/amigo/term/GO:0031103	GAP43 PTN
0.0241103	3	214	11.8669	GO:0021543 Pallium development	https://amigo.geneontology.org/amigo/term/GO:0021543	ROBO1 MDK ID4
0.0241689	2	51	30.0306	GO:0042596 Fear response	https://amigo.geneontology.org/amigo/term/GO:0042596	MDK GRIK2
0.0242805	4	442	7.24877	GO:0030900 Forebrain development	https://amigo.geneontology.org/amigo/term/GO:0030900	ROBO1 MDK GBX2 ID4
0.0256472	2	51	28.8529	GO:0007215 Glutamate receptor signaling pathway	https://amigo.geneontology.org/amigo/term/GO:0007215	GRIK5 GRIK2
0.0257445	3	205	11.4365	GO:0031099 Regeneration	https://amigo.geneontology.org/amigo/term/GO:0031099	GAP43 PTN MDK
0.0259904	4	454	7.05755	GO:0001503 Ossification	https://amigo.geneontology.org/amigo/term/GO:0001503	PTN MDK ID4 GABBR1
0.0268825	2	73	27.7642	GO:0050805 Negative regulation of synaptic transmission	https://amigo.geneontology.org/amigo/term/GO:0050805	GRIK2 GABBR1
0.0274214	3	212	11.0363	GO:0021953 Central nervous system neuron differentiation	https://amigo.geneontology.org/amigo/term/GO:0021953	ROBO1 GBX2 ID4
0.0274214	3	214	11.0363	GO:0048839 Inner ear development	https://amigo.geneontology.org/amigo/term/GO:0048839	FZD3 GABRB2 GBX2
0.0291373	3	227	10.7671	GO:0050920 Regulation of chemotaxis	https://amigo.geneontology.org/amigo/term/GO:0050920	ROBO1 PTN MDK
0.0298079	1	3	367.875	GO:0014053 Negative regulation of gamma-aminobutyric acid secretion	https://amigo.geneontology.org/amigo/term/GO:0014053	GABBR1
0.0298079	2	60	25.8158	GO:0031102 Neuron projection regeneration	https://amigo.geneontology.org/amigo/term/GO:0031102	GAP43 PTN
0.0303918	4	475	6.61348	GO:0007409 Axonogenesis	https://amigo.geneontology.org/amigo/term/GO:0007409	GAP43 ROBO1 FZD3 GBX2
0.0303918	3	225	10.4609	GO:0009612 Response to mechanical stimulus	https://amigo.geneontology.org/amigo/term/GO:0009612	PTN MDK GAP43
0.0303918	6	1202	4.03151	GO:0009628 Response to abiotic stimulus	https://amigo.geneontology.org/amigo/term/GO:0009628	FZD3 PTN MDK GRIK2 GAP43 MT-ND3
0.0303918	4	484	6.59865	GO:0016055 Wnt signaling pathway	https://amigo.geneontology.org/amigo/term/GO:0016055	DKK3 FZD3 MDK LMBR1L
0.0310747	8	2185	3.04816	GO:0008283 Cell population proliferation	https://amigo.geneontology.org/amigo/term/GO:0008283	PTN MDK FZD3 LMBR1L GBX2 ID4 GABBR1 ROBO1
0.0310747	2	62	24.525	GO:0043113 Receptor clustering	https://amigo.geneontology.org/amigo/term/GO:0043113	PTN GRIK2
0.0323075	8	2165	3.02156	GO:0009888 Tissue development	https://amigo.geneontology.org/amigo/term/GO:0009888	GPC1 FZD3 PTN MDK GBX2 ID4 ROBO1 MEST
0.0326404	7	1726	3.39502	GO:0055085 Transmembrane transport	https://amigo.geneontology.org/amigo/term/GO:0055085	GABRB2 GABRA2 GABRG1 GABRG3 GRIK5 GRIK2 MT-ND3
0.0348237	3	242	9.76659	GO:0043583 Ear development	https://amigo.geneontology.org/amigo/term/GO:0043583	FZD3 GABRB2 GBX2
0.0356167	4	533	5.98171	GO:0002009 Morphogenesis of an epithelium	https://amigo.geneontology.org/amigo/term/GO:0002009	FZD3 GBX2 ID4 MDK
0.0356167	1	5	245.25	GO:0006599 Phosphagen metabolic process	https://amigo.geneontology.org/amigo/term/GO:0006599	CKB
0.0356167	1	5	245.25	GO:0006603 Phosphocreatine metabolic process	https://amigo.geneontology.org/amigo/term/GO:0006603	CKB
0.0356167	2	77	21.3261	GO:0014015 Positive regulation of gliogenesis	https://amigo.geneontology.org/amigo/term/GO:0014015	PTN MDK
0.0356167	1	3	245.25	GO:0021555 Midbrain-hindbrain boundary morphogenesis	https://amigo.geneontology.org/amigo/term/GO:0021555	GBX2
0.0356167	1	3	245.25	GO:0030421 Defecation	https://amigo.geneontology.org/amigo/term/GO:0030421	MDK
0.0356167	1	3	245.25	GO:0042271 Susceptibility to natural killer cell mediated cytotoxicity	https://amigo.geneontology.org/amigo/term/GO:0042271	CADM1
0.0356167	1	5	245.25	GO:0042396 Phosphagen biosynthetic process	https://amigo.geneontology.org/amigo/term/GO:0042396	CKB
0.0356167	1	3	245.25	GO:0043932 Ossification involved in bone remodeling	https://amigo.geneontology.org/amigo/term/GO:0043932	PTN
0.0356167	1	5	245.25	GO:0046314 Phosphocreatine biosynthetic process	https://amigo.geneontology.org/amigo/term/GO:0046314	CKB
0.0356167	3	256	9.23536	GO:0048863 Stem cell differentiation	https://amigo.geneontology.org/amigo/term/GO:0048863	PTN LMBR1L GBX2
0.0356167	4	537	6.04312	GO:0050804 Modulation of chemical synaptic transmission	https://amigo.geneontology.org/amigo/term/GO:0050804	GRIK5 GRIK2 PTN GABBR1
0.0356167	5	915	4.58697	GO:0060284 Regulation of cell development	https://amigo.geneontology.org/amigo/term/GO:0060284	PTN MDK ROBO1 FZD3 ID4
0.0356167	1	3	245.25	GO:0060741 Prostate gland stromal morphogenesis	https://amigo.geneontology.org/amigo/term/GO:0060741	ID4
0.0356167	4	538	6.03074	GO:0099177 Regulation of trans-synaptic signaling	https://amigo.geneontology.org/amigo/term/GO:0099177	GRIK5 GRIK2 PTN GABBR1
0.0356167	1	3	245.25	GO:0106091 Glial cell projection elongation	https://amigo.geneontology.org/amigo/term/GO:0106091	MDK
0.0356167	1	3	245.25	GO:1904693 Midbrain morphogenesis	https://amigo.geneontology.org/amigo/term/GO:1904693	FZD3
0.0356167	1	3	245.25	GO:1905555 Positive regulation of blood vessel branching	https://amigo.geneontology.org/amigo/term/GO:1905555	MDK
0.0356167	1	3	245.25	GO:1990262 Anti-mullerian hormone receptor signaling pathway	https://amigo.geneontology.org/amigo/term/GO:1990262	DKK3
0.0361353	5	885	4.53048	GO:0034330 Cell junction organization	https://amigo.geneontology.org/amigo/term/GO:0034330	GABRA2 GABRG1 GABRG3 GABRB2 GAP43
0.0375513	2	74	20.1575	GO:0042698 Ovulation cycle	https://amigo.geneontology.org/amigo/term/GO:0042698	PTN MDK
0.0375513	2	81	20.1575	GO:1903036 Positive regulation of response to wounding	https://amigo.geneontology.org/amigo/term/GO:1903036	MDK PTN
0.0378603	3	269	8.9002	GO:0060828 Regulation of canonical wnt signaling pathway	https://amigo.geneontology.org/amigo/term/GO:0060828	DKK3 MDK LMBR1L
0.0400503	12	4782	2.09665	GO:0030154 Cell differentiation	https://amigo.geneontology.org/amigo/term/GO:0030154	GAP43 ID4 PTN MDK ROBO1 GPC1 FZD3 LMBR1L GABRB2 GBX2 CADM1 GABBR1
0.0400503	12	4783	2.09615	GO:0048869 Cellular developmental process	https://amigo.geneontology.org/amigo/term/GO:0048869	GAP43 ID4 PTN MDK ROBO1 GPC1 FZD3 LMBR1L GABRB2 GBX2 CADM1 GABBR1
0.0415537	2	82	18.8654	GO:0048678 Response to axon injury	https://amigo.geneontology.org/amigo/term/GO:0048678	GAP43 PTN
0.0417147	9	2868	2.5361	GO:0009653 Anatomical structure morphogenesis	https://amigo.geneontology.org/amigo/term/GO:0009653	GAP43 ROBO1 FZD3 PTN MDK GBX2 ID4 GPC1 DKK3
0.0417147	1	4	183.938	GO:0009794 Regulation of mitotic cell cycle embryonic	https://amigo.geneontology.org/amigo/term/GO:0009794	FZD3
0.0417147	3	295	8.48942	GO:0010721 Negative regulation of cell development	https://amigo.geneontology.org/amigo/term/GO:0010721	PTN ID4 MDK
0.0417147	1	4	183.938	GO:0032345 Negative regulation of aldosterone metabolic process	https://amigo.geneontology.org/amigo/term/GO:0032345	DKK3
0.0417147	1	4	183.938	GO:0032348 Negative regulation of aldosterone biosynthetic process	https://amigo.geneontology.org/amigo/term/GO:0032348	DKK3
0.0417147	1	4	183.938	GO:0033600 Negative regulation of mammary gland epithelial cell proliferation	https://amigo.geneontology.org/amigo/term/GO:0033600	ROBO1
0.0417147	1	5	183.938	GO:0036515 Serotonergic neuron axon guidance	https://amigo.geneontology.org/amigo/term/GO:0036515	FZD3
0.0417147	1	4	183.938	GO:0045448 Mitotic cell cycle embryonic	https://amigo.geneontology.org/amigo/term/GO:0045448	FZD3
0.0417147	1	4	183.938	GO:0050923 Regulation of negative chemotaxis	https://amigo.geneontology.org/amigo/term/GO:0050923	ROBO1
0.0417147	1	9	183.938	GO:0071673 Positive regulation of smooth muscle cell chemotaxis	https://amigo.geneontology.org/amigo/term/GO:0071673	MDK
0.0417147	1	4	183.938	GO:1905553 Regulation of blood vessel branching	https://amigo.geneontology.org/amigo/term/GO:1905553	MDK
0.0417147	1	4	183.938	GO:2000065 Negative regulation of cortisol biosynthetic process	https://amigo.geneontology.org/amigo/term/GO:2000065	DKK3
0.043036	2	102	17.7289	GO:0048708 Astrocyte differentiation	https://amigo.geneontology.org/amigo/term/GO:0048708	GAP43 ID4
0.0437151	3	301	8.11489	GO:0021537 Telencephalon development	https://amigo.geneontology.org/amigo/term/GO:0021537	ROBO1 MDK ID4
0.0438855	3	326	8.08516	GO:0098742 Cell-cell adhesion via plasma-membrane adhesion molecules	https://amigo.geneontology.org/amigo/term/GO:0098742	CADM1 ROBO1 PCDH19
0.0472865	6	1465	3.42741	GO:0009968 Negative regulation of signal transduction	https://amigo.geneontology.org/amigo/term/GO:0009968	DKK3 GPC1 MDK LMBR1L CADM1 ROBO1
0.0472865	1	5	147.15	GO:0016199 Axon midline choice point recognition	https://amigo.geneontology.org/amigo/term/GO:0016199	ROBO1
0.0472865	2	102	16.7216	GO:0030901 Midbrain development	https://amigo.geneontology.org/amigo/term/GO:0030901	CKB FZD3
0.0472865	1	5	147.15	GO:0031944 Negative regulation of glucocorticoid metabolic process	https://amigo.geneontology.org/amigo/term/GO:0031944	DKK3
0.0472865	1	5	147.15	GO:0031947 Negative regulation of glucocorticoid biosynthetic process	https://amigo.geneontology.org/amigo/term/GO:0031947	DKK3
0.0472865	1	5	147.15	GO:0032811 Negative regulation of epinephrine secretion	https://amigo.geneontology.org/amigo/term/GO:0032811	GABBR1
0.0472865	1	5	147.15	GO:0033602 Negative regulation of dopamine secretion	https://amigo.geneontology.org/amigo/term/GO:0033602	GABBR1
0.0472865	1	5	147.15	GO:0035385 Roundabout signaling pathway	https://amigo.geneontology.org/amigo/term/GO:0035385	ROBO1
0.0472865	1	5	147.15	GO:0045590 Negative regulation of regulatory t cell differentiation	https://amigo.geneontology.org/amigo/term/GO:0045590	MDK
0.0472865	2	98	16.1703	GO:0046849 Bone remodeling	https://amigo.geneontology.org/amigo/term/GO:0046849	PTN MDK
0.0472865	1	5	147.15	GO:0050960 Detection of temperature stimulus involved in thermoception	https://amigo.geneontology.org/amigo/term/GO:0050960	GRIK2
0.0472865	6	1449	3.38276	GO:0051094 Positive regulation of developmental process	https://amigo.geneontology.org/amigo/term/GO:0051094	PTN MDK ROBO1 GPC1 FZD3 ID4
0.0472865	5	1026	4.03372	GO:0098660 Inorganic ion transmembrane transport	https://amigo.geneontology.org/amigo/term/GO:0098660	GABRB2 GABRA2 GABRG1 GABRG3 MT-ND3
0.0472865	1	11	147.15	GO:0150099 Neuron-glial cell signaling	https://amigo.geneontology.org/amigo/term/GO:0150099	GABBR1
0.0474414	2	97	15.9946	GO:0021954 Central nervous system neuron development	https://amigo.geneontology.org/amigo/term/GO:0021954	ROBO1 GBX2
0.0481687	2	103	15.8226	GO:0051781 Positive regulation of cell division	https://amigo.geneontology.org/amigo/term/GO:0051781	PTN MDK
0.0488508	2	106	15.6543	GO:0002690 Positive regulation of leukocyte chemotaxis	https://amigo.geneontology.org/amigo/term/GO:0002690	PTN MDK
0.0488508	3	310	7.4822	GO:0048511 Rhythmic process	https://amigo.geneontology.org/amigo/term/GO:0048511	ID4 PTN MDK
0.0493501	2	99	15.4895	GO:0021766 Hippocampus development	https://amigo.geneontology.org/amigo/term/GO:0021766	MDK ID4
0.0498536	9	3054	2.41142	GO:0048468 Cell development	https://amigo.geneontology.org/amigo/term/GO:0048468	GAP43 PTN MDK ROBO1 FZD3 LMBR1L GABRB2 GBX2 ID4
0.0502922	5	1028	3.93449	GO:0007167 Enzyme-linked receptor protein signaling pathway	https://amigo.geneontology.org/amigo/term/GO:0007167	GPC1 CADM1 ROBO1 DKK3 PTN
0.0505293	2	100	15.1701	GO:0033555 Multicellular organismal response to stress	https://amigo.geneontology.org/amigo/term/GO:0033555	MDK GRIK2
0.0513666	1	6	122.625	GO:0007185 Cell surface receptor protein tyrosine phosphatase signaling pathway	https://amigo.geneontology.org/amigo/term/GO:0007185	PTN
0.0513666	1	6	122.625	GO:0014060 Regulation of epinephrine secretion	https://amigo.geneontology.org/amigo/term/GO:0014060	GABBR1
0.0513666	1	6	122.625	GO:0021800 Cerebral cortex tangential migration	https://amigo.geneontology.org/amigo/term/GO:0021800	ROBO1
0.0513666	1	6	122.625	GO:0021891 Olfactory bulb interneuron development	https://amigo.geneontology.org/amigo/term/GO:0021891	ROBO1
0.0513666	1	6	122.625	GO:0036514 Dopaminergic neuron axon guidance	https://amigo.geneontology.org/amigo/term/GO:0036514	FZD3
0.0513666	3	339	7.26069	GO:0060485 Mesenchyme development	https://amigo.geneontology.org/amigo/term/GO:0060485	GBX2 MDK ROBO1
0.0513666	1	6	122.625	GO:0071420 Cellular response to histamine	https://amigo.geneontology.org/amigo/term/GO:0071420	GABRB2
0.0513666	1	11	122.625	GO:0071671 Regulation of smooth muscle cell chemotaxis	https://amigo.geneontology.org/amigo/term/GO:0071671	MDK
0.0513666	1	6	122.625	GO:0090032 Negative regulation of steroid hormone biosynthetic process	https://amigo.geneontology.org/amigo/term/GO:0090032	DKK3
0.0514284	3	332	7.1432	GO:0090287 Regulation of cellular response to growth factor stimulus	https://amigo.geneontology.org/amigo/term/GO:0090287	GPC1 ROBO1 DKK3
0.052712	6	1531	3.23644	GO:2000026 Regulation of multicellular organismal development	https://amigo.geneontology.org/amigo/term/GO:2000026	GBX2 PTN MDK ROBO1 FZD3 ID4
0.0529414	10	3753	2.20087	GO:0023051 Regulation of signaling	https://amigo.geneontology.org/amigo/term/GO:0023051	DKK3 GPC1 GRIK5 GRIK2 PTN MDK LMBR1L CADM1 GABBR1 ROBO1
0.0532034	1	14	105.107	GO:0003129 Heart induction	https://amigo.geneontology.org/amigo/term/GO:0003129	ROBO1
0.0532034	10	3758	2.19561	GO:0010646 Regulation of cell communication	https://amigo.geneontology.org/amigo/term/GO:0010646	DKK3 GPC1 GRIK5 GRIK2 PTN MDK LMBR1L CADM1 GABBR1 ROBO1
0.0532034	1	8	105.107	GO:0014052 Regulation of gamma-aminobutyric acid secretion	https://amigo.geneontology.org/amigo/term/GO:0014052	GABBR1
0.0532034	2	111	14.0143	GO:0021549 Cerebellum development	https://amigo.geneontology.org/amigo/term/GO:0021549	MDK GBX2
0.0532034	1	7	105.107	GO:0022028 Tangential migration from the subventricular zone to the olfactory bulb	https://amigo.geneontology.org/amigo/term/GO:0022028	ROBO1
0.0532034	3	346	6.83359	GO:0030111 Regulation of wnt signaling pathway	https://amigo.geneontology.org/amigo/term/GO:0030111	DKK3 MDK LMBR1L
0.0532034	1	7	105.107	GO:0030917 Midbrain-hindbrain boundary development	https://amigo.geneontology.org/amigo/term/GO:0030917	GBX2
0.0532034	2	116	13.8821	GO:0035249 Synaptic transmission glutamatergic	https://amigo.geneontology.org/amigo/term/GO:0035249	GRIK5 GRIK2
0.0532034	2	117	13.7523	GO:0042472 Inner ear morphogenesis	https://amigo.geneontology.org/amigo/term/GO:0042472	FZD3 GBX2
0.0532034	1	7	105.107	GO:0048242 Epinephrine secretion	https://amigo.geneontology.org/amigo/term/GO:0048242	GABBR1
0.0532034	1	8	105.107	GO:0051967 Negative regulation of synaptic transmission glutamatergic	https://amigo.geneontology.org/amigo/term/GO:0051967	GRIK2
0.0532034	2	113	14.0143	GO:0060079 Excitatory postsynaptic potential	https://amigo.geneontology.org/amigo/term/GO:0060079	GRIK5 GRIK2
0.0532034	2	106	14.0143	GO:0060840 Artery development	https://amigo.geneontology.org/amigo/term/GO:0060840	MDK ROBO1
0.0532034	9	3185	2.35147	GO:0065008 Regulation of biological quality	https://amigo.geneontology.org/amigo/term/GO:0065008	GABRA2 GABRG1 GABRG3 DKK3 GRIK5 PTN GABRB2 GRIK2 GABBR1
[truncated: 448 more rows]
