# Supplementary material for: Human forebrain assembloids modeling a neurodevelopmental disorder reveals neural circuit deficits via DNA damage
Source: Research Square preprint supplement (doi:10.21203/rs.3.rs-7957934/v1), 2025-11-14
Supplement: Supplementary file 2 [file 6e54b678f32594ae6dace96a.xlsx]

## Sheet: Day 50 Dorsal
	baseMean	log2FoldChange	lfcSE	stat	pvalue	padj
FABP7	8026.03	1.24712	0.0752076	16.5824	9.34e-62	1.53e-57
CHL1	8886.89	-2.92722	0.188433	-15.5345	2.03e-54	1.66e-50
MEST	13942.2	-1.2788	0.0963744	-13.2691	3.5e-40	1.91e-36
RPE65	539.92	-1.66462	0.126493	-13.1598	1.5e-39	6.12e-36
DDR2	191.546	-2.41637	0.184817	-13.0744	4.61e-39	1.51e-35
CALCRL	253.785	-2.37533	0.188167	-12.6235	1.57e-36	4.28e-33
TSPAN5	4146.99	0.588639	0.0484753	12.1431	6.24e-34	1.46e-30
CPS1	245.395	-1.76033	0.145737	-12.0788	1.37e-33	2.8e-30
SLFN11	178.505	-3.97892	0.342737	-11.6092	3.7e-31	6.73e-28
LOC100288778	419.722	-1.30659	0.11389	-11.4723	1.82e-30	2.97e-27
COL8A1	878.785	-5.58496	0.4928	-11.3331	8.99e-30	1.34e-26
GALNT15	590.667	-2.40512	0.214471	-11.2142	3.47e-29	4.74e-26
TBR1	116.569	6.28412	0.561853	11.1846	4.85e-29	6.11e-26
PCDHGB4	1975.01	-1.45696	0.130599	-11.156	6.69e-29	7.82e-26
PCDHGB7	1213.03	-1.58151	0.141919	-11.1437	7.68e-29	8.38e-26
FOLH1	101.248	-7.83901	0.706001	-11.1034	1.21e-28	1.24e-25
ADAMTSL1	346.498	-2.82643	0.257215	-10.9886	4.34e-28	4.18e-25
RRBP1	1429.08	-0.805916	0.0739887	-10.8924	1.25e-27	1.14e-24
CAV2	176.878	-2.35065	0.219209	-10.7233	7.91e-27	6.81e-24
CORIN	92.6494	-3.67797	0.347504	-10.584	3.54e-26	2.89e-23
NTN1	14640	-1.53806	0.146993	-10.4635	1.27e-25	9.91e-23
FRZB	3156.89	-4.31595	0.414592	-10.4101	2.23e-25	1.66e-22
COL4A1	1494.96	-2.21223	0.213629	-10.3555	3.95e-25	2.81e-22
BCL6	660.139	-1.33525	0.129189	-10.3356	4.86e-25	3.28e-22
ANGPTL2	870.905	-1.77346	0.171633	-10.3329	5e-25	3.28e-22
ERV3.1	234.529	-1.83558	0.177906	-10.3177	5.86e-25	3.69e-22
IRAK1	564.093	-1.41304	0.137079	-10.3082	6.47e-25	3.92e-22
PEG3	6001.09	-6.28824	0.61423	-10.2376	1.35e-24	7.86e-22
C3orf58	2304.8	-1.64337	0.16058	-10.2339	1.4e-24	7.89e-22
EDNRA	60.8292	-3.23974	0.317476	-10.2047	1.89e-24	1.03e-21
PAM	16641.6	-1.39958	0.137203	-10.2008	1.97e-24	1.04e-21
BHLHE40	1611.6	-2.01066	0.19852	-10.1282	4.14e-24	2.12e-21
RXRA	1576.3	-0.969187	0.0962181	-10.0728	7.29e-24	3.61e-21
ELK3	494.567	-1.90946	0.191321	-9.98042	1.86e-23	8.94e-21
TMBIM1	136.817	-2.03341	0.20641	-9.85134	6.76e-23	3.16e-20
FN1	1131.14	-2.07095	0.210524	-9.83713	7.79e-23	3.54e-20
NUP93	5304.03	0.540035	0.0557989	9.67823	3.73e-22	1.65e-19
ID3	257.667	-3.20394	0.3314	-9.66788	4.13e-22	1.78e-19
CHST6	708.644	-1.83925	0.190412	-9.65933	4.49e-22	1.88e-19
SPARCL1	56479.3	-3.72626	0.387349	-9.61991	6.59e-22	2.7e-19
B3GNT9	155.128	-1.93514	0.202045	-9.5778	9.91e-22	3.96e-19
CTNNA3	150.349	-1.75646	0.184139	-9.53877	1.45e-21	5.63e-19
TGFBR3	128.046	-2.66705	0.28004	-9.52383	1.67e-21	6.35e-19
CBLN4	54.0244	18.6107	1.96263	9.48255	2.48e-21	9.23e-19
GRM3	1644.95	1.57124	0.166544	9.43441	3.93e-21	1.43e-18
BZW2	3321	0.593669	0.0630053	9.42252	4.4e-21	1.57e-18
MTM1	715.542	-0.899666	0.095595	-9.41122	4.9e-21	1.71e-18
FAM53B	2300.9	-0.835673	0.0895293	-9.33408	1.02e-20	3.47e-18
FAM135B	360.177	-7.52242	0.808344	-9.30597	1.33e-20	4.43e-18
DCHS2	1492.11	-1.57177	0.169518	-9.27198	1.83e-20	5.98e-18
AGPAT2	221.797	-1.49538	0.161555	-9.25613	2.12e-20	6.8e-18
FRMPD3	1036	-1.25439	0.13566	-9.24657	2.32e-20	7.3e-18
IQGAP2	2555.19	-1.13424	0.123189	-9.20732	3.34e-20	1.03e-17
ASTN2	1875.05	-1.36616	0.148574	-9.1952	3.74e-20	1.13e-17
KCNE4	80.703	-3.23754	0.356924	-9.07069	1.18e-19	3.52e-17
ACSS3	511.843	-1.77902	0.196447	-9.05595	1.35e-19	3.88e-17
FREM2	973.709	-1.36377	0.150624	-9.05417	1.38e-19	3.88e-17
PERP	536.567	-1.82638	0.201658	-9.05682	1.34e-19	3.88e-17
HSPB6	67.2741	-2.64031	0.292152	-9.03748	1.6e-19	4.45e-17
VAV3	169.315	1.67658	0.186225	9.00301	2.2e-19	5.99e-17
PROS1	647.14	-1.62419	0.180501	-8.99828	2.29e-19	6.15e-17
AQP4	11449.4	-2.30143	0.257378	-8.94186	3.83e-19	1.01e-16
EFNA5	2434.53	-1.20584	0.135032	-8.92997	4.26e-19	1.11e-16
KCNJ8	125.516	-1.5321	0.171621	-8.9272	4.37e-19	1.12e-16
SPARC	22342.6	-1.59546	0.178918	-8.91726	4.78e-19	1.2e-16
KCNA1	182.442	2.73913	0.307251	8.91496	4.88e-19	1.21e-16
PLSCR4	306.048	-2.08566	0.234524	-8.89318	5.94e-19	1.45e-16
DACH1	1350.16	1.58781	0.179086	8.8662	7.57e-19	1.82e-16
TRIM9	5138.3	-0.67507	0.0765158	-8.82262	1.12e-18	2.65e-16
COL4A2	2945.21	-1.13385	0.128658	-8.81291	1.22e-18	2.85e-16
LAPTM4A	4696.94	-0.699211	0.0794381	-8.80196	1.34e-18	3.1e-16
B4GALT1	267.67	-1.30394	0.148174	-8.80004	1.37e-18	3.11e-16
EFCAB2	372.261	-1.02882	0.117145	-8.78243	1.6e-18	3.59e-16
SPON1	15408.5	-2.07372	0.237143	-8.74459	2.24e-18	4.92e-16
TMEM47	6766.9	-1.339	0.153137	-8.74377	2.25e-18	4.92e-16
CD24	27484.1	0.603584	0.0690525	8.74094	2.31e-18	4.98e-16
PLCD3	828.603	-1.17701	0.134694	-8.73836	2.37e-18	5.03e-16
ADM	952.593	-3.50073	0.401333	-8.72276	2.71e-18	5.62e-16
ENOX1	949.332	0.937137	0.107419	8.72413	2.68e-18	5.62e-16
FREM1	100.408	-2.2043	0.253024	-8.71184	2.99e-18	6.12e-16
PRELP	635.704	-3.80814	0.437655	-8.70124	3.28e-18	6.63e-16
CTSC	382.725	-1.34229	0.154618	-8.68132	3.91e-18	7.81e-16
TIPARP	1586.04	-0.897693	0.10343	-8.67924	3.98e-18	7.86e-16
TLN1	2276.69	-0.963163	0.111118	-8.66794	4.4e-18	8.57e-16
ETNPPL	331.11	-5.9417	0.686088	-8.66027	4.71e-18	9.06e-16
LGR4	2373.03	-1.33168	0.154585	-8.61455	7.02e-18	1.34e-15
MTMR10	426.768	-1.59508	0.185663	-8.59129	8.6e-18	1.6e-15
JAM2	4313.27	-1.97041	0.229355	-8.5911	8.61e-18	1.6e-15
AHNAK	1935.45	-2.47275	0.288034	-8.58492	9.09e-18	1.67e-15
ITGB4	149.368	-3.90335	0.457898	-8.5245	1.53e-17	2.79e-15
WASF2	3196.27	-1.0813	0.127526	-8.479	2.27e-17	4.09e-15
SLIT2	9259.65	-1.88312	0.222271	-8.47218	2.41e-17	4.28e-15
CHST15	1024.13	-2.06634	0.244134	-8.46396	2.58e-17	4.55e-15
PGF	95.8304	-2.11001	0.249603	-8.45349	2.83e-17	4.92e-15
CCDC80	501.307	-2.02675	0.239864	-8.44959	2.92e-17	5.04e-15
TRIM6	51.7639	-2.4413	0.290348	-8.40819	4.16e-17	7.1e-15
FHOD3	2460.22	0.523514	0.0623794	8.39241	4.76e-17	8.04e-15
RUNX1T1	5886.41	1.15137	0.137391	8.38025	5.28e-17	8.82e-15
PAPSS2	197.411	-2.75129	0.329285	-8.35536	6.52e-17	1.08e-14
GPNMB	1144.45	-3.94918	0.472752	-8.3536	6.62e-17	1.08e-14
LRRC3	1063.6	-0.727724	0.087458	-8.32084	8.73e-17	1.42e-14
SIX6	186.57	-7.09227	0.853745	-8.30725	9.79e-17	1.57e-14
ARSJ	33.7715	-3.20214	0.386516	-8.28461	1.18e-16	1.88e-14
MLEC	7781.48	-0.726213	0.0876889	-8.28169	1.21e-16	1.9e-14
AEBP1	1485.57	-1.47791	0.178466	-8.2812	1.22e-16	1.9e-14
GRIN2A	942.775	-1.74103	0.210796	-8.25931	1.47e-16	2.26e-14
SLC39A8	195.312	-1.45072	0.175696	-8.25701	1.49e-16	2.28e-14
NAP1L6	27.1729	-3.85234	0.467761	-8.23571	1.79e-16	2.71e-14
DYRK4	579.144	-0.952279	0.115743	-8.22751	1.91e-16	2.87e-14
FRAS1	842.637	0.800404	0.0976571	8.19607	2.48e-16	3.7e-14
FAM19A2	1287.52	0.836412	0.102111	8.1912	2.59e-16	3.78e-14
TMEM64	880.472	-0.695263	0.0848776	-8.19136	2.58e-16	3.78e-14
CDKN2B	150.204	-2.76024	0.337051	-8.18938	2.63e-16	3.8e-14
IQGAP1	2432.69	-1.17961	0.144271	-8.17634	2.93e-16	4.2e-14
LINC01088	57.0385	-3.54395	0.43485	-8.14982	3.64e-16	5.19e-14
CREB3L2	635.909	-0.895712	0.110937	-8.07404	6.8e-16	9.6e-14
LGR5	140.027	-4.11999	0.51081	-8.0656	7.29e-16	1.01e-13
FOXJ1	263.285	-2.25348	0.279378	-8.06606	7.26e-16	1.01e-13
PLOD1	2524.62	-1.08074	0.134232	-8.05122	8.2e-16	1.13e-13
SULF1	5139.79	-2.68763	0.334939	-8.02423	1.02e-15	1.39e-13
SCARB1	805.547	-0.647396	0.0807576	-8.01653	1.09e-15	1.47e-13
ACTG2	17.8357	-4.58638	0.572499	-8.01115	1.14e-15	1.52e-13
TSSC2	343.536	0.857464	0.107288	7.99217	1.33e-15	1.74e-13
B3GAT2	155.178	-1.48518	0.18582	-7.99256	1.32e-15	1.74e-13
IGSF1	1490.63	-1.2738	0.159355	-7.99348	1.31e-15	1.74e-13
TRPM8	115.761	-1.71611	0.215151	-7.97633	1.51e-15	1.96e-13
VAMP5	46.3851	-2.69257	0.337958	-7.96716	1.62e-15	2.09e-13
SP140L	48.3141	-4.44461	0.559668	-7.94152	2e-15	2.55e-13
COL22A1	168.48	-5.43698	0.685874	-7.92709	2.24e-15	2.85e-13
STAT3	4973.62	-0.579778	0.0731746	-7.92321	2.31e-15	2.91e-13
TFE3	2377.72	-0.781948	0.0987365	-7.91954	2.38e-15	2.98e-13
CELSR1	1729.26	-1.40273	0.177185	-7.91673	2.44e-15	3.02e-13
TMEM176B	91.2261	-3.14814	0.398492	-7.90012	2.79e-15	3.43e-13
TANC1	814.143	-1.51998	0.192731	-7.88655	3.11e-15	3.79e-13
CALN1	1486.98	0.975831	0.123792	7.88285	3.2e-15	3.85e-13
SLC6A8	4288.76	-0.714001	0.0905661	-7.88376	3.18e-15	3.85e-13
DNASE2	823.053	-1.2577	0.16085	-7.81911	5.32e-15	6.36e-13
ZFP36L2	1655.16	-0.982314	0.126073	-7.7916	6.62e-15	7.85e-13
CTDSP1	413.051	-0.995038	0.127953	-7.7766	7.45e-15	8.77e-13
NMBR	117.504	3.28511	0.422502	7.77538	7.52e-15	8.79e-13
YAP1	2704.16	-1.021	0.131624	-7.75695	8.7e-15	1.01e-12
NAV1	9023.4	0.814667	0.105097	7.75159	9.08e-15	1.03e-12
MMP28	232.849	-1.90798	0.246101	-7.75284	8.99e-15	1.03e-12
ICAM1	48.0717	-2.81026	0.362532	-7.75176	9.06e-15	1.03e-12
SYNPR	2789.35	1.6784	0.216614	7.74833	9.31e-15	1.05e-12
FAM46C	71.898	-2.22081	0.286685	-7.7465	9.45e-15	1.06e-12
FGFRL1	1020.25	-1.01205	0.130653	-7.74606	9.48e-15	1.06e-12
MAGT1	2407.69	-1.14705	0.148154	-7.74224	9.77e-15	1.08e-12
NFATC4	600.665	-1.14397	0.147944	-7.73242	1.06e-14	1.16e-12
PDLIM5	4577.4	-1.349	0.1746	-7.72623	1.11e-14	1.21e-12
HLA.E	1397.79	-1.45154	0.188013	-7.7204	1.16e-14	1.26e-12
NPC2	645.518	-1.52088	0.197151	-7.7143	1.22e-14	1.31e-12
DDX11L2	48.25	4.55514	0.590997	7.70755	1.28e-14	1.37e-12
NPY5R	91.5208	1.89757	0.246348	7.70284	1.33e-14	1.41e-12
OBSL1	5630.62	-0.964985	0.125631	-7.68111	1.58e-14	1.67e-12
SNTG1	583.429	0.793987	0.103586	7.66497	1.79e-14	1.88e-12
ITGA5	191.036	-1.41279	0.184435	-7.66006	1.86e-14	1.94e-12
MMP14	3559.45	-1.64306	0.214778	-7.65006	2.01e-14	2.08e-12
VEGFA	13095.2	-1.0683	0.139685	-7.64788	2.04e-14	2.1e-12
HLA.A	3122.05	-1.58308	0.207135	-7.64274	2.13e-14	2.18e-12
VAMP3	1306.84	-1.0772	0.141512	-7.61206	2.7e-14	2.74e-12
MRAS	3142.05	0.558958	0.0735424	7.60048	2.95e-14	2.98e-12
APLN	359.761	-2.02922	0.267222	-7.59377	3.11e-14	3.12e-12
KCNJ10	439.849	1.35995	0.179148	7.5912	3.17e-14	3.16e-12
ZNRF1	3074.87	0.503814	0.0663959	7.58804	3.25e-14	3.22e-12
NOL4L	4499.98	0.495645	0.0653664	7.58257	3.39e-14	3.34e-12
RETSAT	862.059	-0.756515	0.0998454	-7.57686	3.54e-14	3.47e-12
PAMR1	88.1636	-2.91297	0.384824	-7.5696	3.74e-14	3.65e-12
ANTXR2	467.399	-1.14446	0.151448	-7.55673	4.13e-14	4e-12
IGFBP3	208.765	-1.45914	0.193184	-7.55312	4.25e-14	4.09e-12
GPX8	497.362	-1.45439	0.192722	-7.54656	4.47e-14	4.28e-12
SORCS3	2574.85	-1.26736	0.168003	-7.54367	4.57e-14	4.35e-12
KIF13B	904.618	-0.841465	0.112004	-7.51282	5.79e-14	5.47e-12
UBE2QL1	3290.77	0.582733	0.077574	7.51196	5.82e-14	5.48e-12
C10orf54	52.3151	-2.79039	0.371656	-7.508	6e-14	5.58e-12
B2M	3249.18	-1.1724	0.156147	-7.50833	5.99e-14	5.58e-12
PCGF5	2217.71	-1.06897	0.142844	-7.48346	7.24e-14	6.69e-12
PLTP	2495.28	-1.62437	0.217584	-7.46545	8.3e-14	7.63e-12
CASC9	52.3582	-1.64316	0.220221	-7.46138	8.56e-14	7.83e-12
NDUFA4L2	1622.1	-2.72395	0.365352	-7.4557	8.94e-14	8.13e-12
FAM129B	1238.38	-0.693634	0.0932782	-7.43618	1.04e-13	9.37e-12
UGGT2	621.269	-0.820477	0.110422	-7.43037	1.08e-13	9.74e-12
SHH	1599.79	-3.626	0.488553	-7.4219	1.15e-13	1.03e-11
SEMA3D	204.513	-2.3459	0.316189	-7.4193	1.18e-13	1.05e-11
ITGB1	6544.98	-0.7871	0.1061	-7.41846	1.18e-13	1.05e-11
HSPA1A	760.201	-3.01279	0.407082	-7.40093	1.35e-13	1.19e-11
HES1	1054.33	-1.16572	0.15764	-7.39482	1.42e-13	1.24e-11
TAC1	885.888	1.74099	0.235835	7.38223	1.56e-13	1.36e-11
FLJ16779	873.37	-1.73159	0.234699	-7.37791	1.61e-13	1.39e-11
HLA.DPA1	18.7622	-3.82874	0.519652	-7.36788	1.73e-13	1.49e-11
ISLR	497.126	-3.8668	0.525869	-7.35315	1.94e-13	1.66e-11
STEAP3	88.4221	-1.87338	0.254986	-7.34699	2.03e-13	1.73e-11
SEC24D	1408.26	-0.914689	0.12467	-7.33686	2.19e-13	1.85e-11
C1QL2	291.363	-1.91127	0.260953	-7.32419	2.4e-13	2.03e-11
GFAP	1370.56	-3.87647	0.529633	-7.31917	2.5e-13	2.08e-11
CD36	713.023	-3.10126	0.423698	-7.31951	2.49e-13	2.08e-11
PCDH11X	3076.87	1.39531	0.190972	7.30638	2.74e-13	2.28e-11
PI15	2590.3	-4.25126	0.582716	-7.2956	2.97e-13	2.46e-11
DENND5B	6021.14	0.633802	0.0869324	7.29074	3.08e-13	2.52e-11
FHDC1	691.099	0.912691	0.125181	7.29097	3.08e-13	2.52e-11
CHST9	472.616	-1.33887	0.183763	-7.28585	3.2e-13	2.6e-11
PI16	416.57	-5.45302	0.749081	-7.27962	3.35e-13	2.71e-11
NPTX2	2252.97	-3.16138	0.434359	-7.27826	3.38e-13	2.73e-11
DMD	1659.15	-1.1495	0.158064	-7.27236	3.53e-13	2.83e-11
FAM182B	258.377	-0.866404	0.119149	-7.27162	3.55e-13	2.84e-11
PLOD2	4640.84	-1.4661	0.201667	-7.26987	3.6e-13	2.85e-11
COL21A1	72.7504	-3.71699	0.511284	-7.26992	3.6e-13	2.85e-11
STIM2	1421.29	0.558026	0.0768617	7.26013	3.87e-13	3.04e-11
DSP	144.58	-4.51052	0.621464	-7.2579	3.93e-13	3.08e-11
BAG3	684.446	-1.25969	0.174204	-7.23113	4.79e-13	3.73e-11
LOC403323	24.9218	-5.23568	0.724285	-7.22875	4.87e-13	3.78e-11
RGS8	447.457	0.802334	0.111002	7.2281	4.9e-13	3.78e-11
LOXL3	386.837	-0.812194	0.112428	-7.22412	5.04e-13	3.87e-11
MLC1	4478.72	-1.31764	0.182424	-7.22298	5.09e-13	3.87e-11
PTPN13	2053.81	-0.813018	0.112559	-7.22304	5.08e-13	3.87e-11
SLC35F1	6684.2	0.680159	0.0944629	7.20028	6.01e-13	4.55e-11
CDH1	673.809	-3.90827	0.542922	-7.19858	6.08e-13	4.59e-11
AK7	235.866	-2.15596	0.299599	-7.19617	6.19e-13	4.64e-11
THOC7	1054.8	0.66188	0.0919798	7.19594	6.2e-13	4.64e-11
CDK5R1	14173.9	0.515396	0.0717074	7.18749	6.6e-13	4.91e-11
TCEAL6	428.212	-2.25044	0.31326	-7.18391	6.77e-13	5.02e-11
UNC119B	3212.24	-0.625685	0.0871129	-7.18247	6.85e-13	5.05e-11
CTGF	119.104	-1.83025	0.254954	-7.17876	7.03e-13	5.16e-11
CDH12	489.101	1.08948	0.151921	7.17135	7.43e-13	5.43e-11
FHL1	10903	-0.449933	0.0627476	-7.17051	7.47e-13	5.44e-11
EFEMP1	1374.47	-1.4202	0.198162	-7.16685	7.67e-13	5.56e-11
GGT5	40.0052	-5.99019	0.836319	-7.16256	7.92e-13	5.71e-11
LINC00909	790.183	0.704239	0.0983737	7.15881	8.14e-13	5.84e-11
BMP1	661.604	-1.10301	0.154105	-7.15757	8.21e-13	5.87e-11
DHRS3	397.092	-1.78161	0.249226	-7.14856	8.77e-13	6.24e-11
MPPED2	4023.42	1.36318	0.190836	7.14319	9.12e-13	6.41e-11
CD109	223.334	-2.95846	0.414156	-7.14334	9.11e-13	6.41e-11
SLC25A53	315.702	-0.91353	0.127887	-7.14327	9.11e-13	6.41e-11
PDE10A	3402.21	1.59139	0.222813	7.14226	9.18e-13	6.42e-11
MYOF	2341.49	-3.94778	0.553103	-7.13752	9.5e-13	6.62e-11
GLIS3	1079.58	-1.81898	0.255189	-7.12799	1.02e-12	7.06e-11
ANXA1	644.213	-3.09347	0.434853	-7.11384	1.13e-12	7.79e-11
PCDH18	984.529	-1.4931	0.210149	-7.10497	1.2e-12	8.28e-11
KCNMB1	22.7431	-3.58297	0.505028	-7.09459	1.3e-12	8.88e-11
AGT	1118.1	-4.03847	0.571001	-7.07261	1.52e-12	1.04e-10
SERPINH1	2794.9	-1.4611	0.206831	-7.0642	1.62e-12	1.1e-10
NR2F1	4724.95	-3.09751	0.439352	-7.05019	1.79e-12	1.21e-10
OTUD7A	175.259	-1.12142	0.159173	-7.04529	1.85e-12	1.25e-10
GUCY1A3	1960.06	1.53939	0.218586	7.0425	1.89e-12	1.27e-10
FAN1	1079.61	-0.816924	0.116013	-7.04169	1.9e-12	1.27e-10
LRP2BP	246.276	-1.04792	0.148893	-7.03807	1.95e-12	1.3e-10
BMP7	3769.27	-1.25274	0.178373	-7.02315	2.17e-12	1.44e-10
NMB	190.773	-1.82098	0.259561	-7.01561	2.29e-12	1.51e-10
VPS36	1608.13	0.542477	0.0773646	7.01195	2.35e-12	1.53e-10
HAR1A	237.081	1.63569	0.233273	7.01192	2.35e-12	1.53e-10
SLC31A1	2256.16	-0.6108	0.0871102	-7.0118	2.35e-12	1.53e-10
LUM	298.136	-4.30175	0.614218	-7.00361	2.49e-12	1.62e-10
GJA1	6140.46	-1.33612	0.191249	-6.98626	2.82e-12	1.83e-10
PLA2R1	52.2363	-1.74119	0.249534	-6.97777	3e-12	1.93e-10
COL18A1	708.434	-1.80968	0.259524	-6.97306	3.1e-12	1.99e-10
LOC102724623	31.425	1.86065	0.26698	6.96926	3.19e-12	2.04e-10
BBOX1	213.392	-3.58703	0.514951	-6.96578	3.27e-12	2.08e-10
HEBP1	791.582	-0.927345	0.133424	-6.95039	3.64e-12	2.31e-10
KCNA4	288.662	1.238	0.178142	6.94952	3.67e-12	2.32e-10
MEIS3	2546.36	0.585712	0.0843309	6.94541	3.77e-12	2.38e-10
NDRG1	2984.23	-1.50394	0.21706	-6.92868	4.25e-12	2.66e-10
H3F3AP4	2697.92	0.840031	0.121377	6.92086	4.49e-12	2.8e-10
TSPYL5	973.259	-0.817688	0.118245	-6.91522	4.67e-12	2.91e-10
RNASEL	301.454	-0.77352	0.111908	-6.91211	4.77e-12	2.96e-10
TMEM214	1006.99	-0.669107	0.0969886	-6.89882	5.24e-12	3.24e-10
ZNF702P	373.569	1.97765	0.287006	6.89062	5.55e-12	3.42e-10
PRR5L	1025.2	-2.05023	0.298131	-6.87696	6.11e-12	3.73e-10
SEMA6D	4300.83	-0.617611	0.0898083	-6.87699	6.11e-12	3.73e-10
FAS	134.743	-1.49208	0.217025	-6.87512	6.19e-12	3.77e-10
RYR1	186.193	-1.33692	0.194627	-6.86915	6.46e-12	3.9e-10
COL6A1	5720.47	-0.626948	0.0912766	-6.86866	6.48e-12	3.9e-10
DLC1	294.298	-1.17814	0.171506	-6.86938	6.45e-12	3.9e-10
C10orf105	178.962	-2.29943	0.335036	-6.86323	6.73e-12	4.04e-10
MYOZ3	315.509	0.938563	0.137103	6.8457	7.61e-12	4.55e-10
SYTL4	134.282	-1.40335	0.205017	-6.84507	7.64e-12	4.55e-10
CACNA2D3	939.673	1.01431	0.148286	6.84018	7.91e-12	4.69e-10
SLC16A1	6020.69	-1.16246	0.170109	-6.83363	8.28e-12	4.86e-10
RBMS1	461.607	-2.05149	0.300203	-6.83365	8.28e-12	4.86e-10
CLDND1	4331.12	-0.488036	0.0714111	-6.83419	8.25e-12	4.86e-10
CLN5	1183.75	-0.648702	0.0949956	-6.82876	8.56e-12	5.01e-10
OLFML2B	85.6513	-3.92775	0.575805	-6.82132	9.02e-12	5.25e-10
PRKCQ	280.419	-1.7026	0.250041	-6.8093	9.81e-12	5.69e-10
FRMD6	251.937	-0.939173	0.138038	-6.80372	1.02e-11	5.9e-10
NR5A1	20.2996	-4.77839	0.702429	-6.80267	1.03e-11	5.92e-10
LOC100130417	126.814	1.27674	0.187806	6.7982	1.06e-11	6.08e-10
SLC1A2	12076.7	0.583913	0.085956	6.79316	1.1e-11	6.28e-10
CFAP45	129.853	-3.2074	0.472615	-6.7865	1.15e-11	6.55e-10
CD63	6851.53	-0.740076	0.109064	-6.78573	1.15e-11	6.56e-10
TMEM176A	49.9403	-3.87437	0.571169	-6.78322	1.18e-11	6.66e-10
MTSS1L	11707.5	-0.705825	0.104162	-6.7762	1.23e-11	6.96e-10
SDC4	406.439	-2.17778	0.321435	-6.77516	1.24e-11	6.99e-10
ANXA2	2764.11	-2.48329	0.367181	-6.76312	1.35e-11	7.57e-10
GOLGA6L9	350.043	0.824114	0.121981	6.75606	1.42e-11	7.92e-10
ABCC1	1205.2	-0.798704	0.118381	-6.74689	1.51e-11	8.41e-10
KIF19	32.5929	-2.15421	0.319402	-6.74451	1.54e-11	8.52e-10
EPB41L2	1389.78	-0.890793	0.132228	-6.73679	1.62e-11	8.95e-10
TPST2	404.39	-1.2743	0.189277	-6.73245	1.67e-11	9.19e-10
GRAMD3	423.76	-2.94256	0.43776	-6.72185	1.79e-11	9.85e-10
LRP10	1286.8	-1.15414	0.171764	-6.71937	1.83e-11	9.94e-10
CHRNA7	137.325	-0.913685	0.135982	-6.71915	1.83e-11	9.94e-10
PSMG3.AS1	217.263	0.762888	0.113529	6.71974	1.82e-11	9.94e-10
HTR2C	4131.11	-2.58909	0.38543	-6.7174	1.85e-11	1e-09
GADD45B	155.329	-2.01677	0.300716	-6.70656	1.99e-11	1.08e-09
VASH2	2093.06	1.18606	0.176999	6.70097	2.07e-11	1.11e-09
FCGRT	393.638	-1.46752	0.219012	-6.70064	2.08e-11	1.11e-09
MICA	202.492	-1.82261	0.271989	-6.70104	2.07e-11	1.11e-09
FYCO1	370.77	-0.992918	0.148221	-6.69891	2.1e-11	1.12e-09
MAML2	806.927	-0.826867	0.123495	-6.69556	2.15e-11	1.14e-09
RFX2	506.449	-1.20522	0.180227	-6.68722	2.27e-11	1.2e-09
DRC1	355.133	-2.17779	0.325665	-6.68722	2.27e-11	1.2e-09
NDNF	689.312	-2.02241	0.302454	-6.68668	2.28e-11	1.2e-09
HSPA5	32890.8	-0.987951	0.147879	-6.6808	2.38e-11	1.25e-09
FRMPD4	711.831	0.992217	0.148537	6.67994	2.39e-11	1.25e-09
ADARB2	1488.92	1.09388	0.163837	6.67664	2.44e-11	1.27e-09
PRSS23	631.301	-2.20122	0.329828	-6.67385	2.49e-11	1.29e-09
SS18L1	4835.53	0.449851	0.0674073	6.67362	2.5e-11	1.29e-09
ATP1A2	21768.4	-1.13534	0.170288	-6.66718	2.61e-11	1.35e-09
ABHD14B	74.9619	-1.34566	0.201964	-6.66289	2.68e-11	1.38e-09
GAPDH	62788.9	-0.6749	0.101397	-6.65604	2.81e-11	1.44e-09
MGAT4C	619.651	0.770247	0.116008	6.63959	3.15e-11	1.61e-09
TTC9	3302.59	0.603109	0.0908767	6.63657	3.21e-11	1.64e-09
C16orf89	64.0025	-3.55687	0.536307	-6.63216	3.31e-11	1.68e-09
CRISPLD1	5240.41	-1.93569	0.291927	-6.63071	3.34e-11	1.69e-09
TECR	2235.59	-1.0264	0.154869	-6.62752	3.41e-11	1.72e-09
ST5	1794.39	-0.95572	0.144226	-6.62653	3.44e-11	1.73e-09
P4HB	8877.04	-0.728417	0.109945	-6.62526	3.47e-11	1.74e-09
CPA4	23.9673	-3.05834	0.46175	-6.62339	3.51e-11	1.76e-09
SALL3	711.655	1.62971	0.246168	6.62031	3.58e-11	1.79e-09
LINC00581	65.601	1.94257	0.293916	6.60927	3.86e-11	1.92e-09
EFNB3	11235.6	-1.42167	0.215228	-6.6054	3.96e-11	1.97e-09
ECM2	185.697	-4.61186	0.698703	-6.60059	4.1e-11	2.02e-09
LAMA4	940.313	-1.44826	0.219731	-6.59104	4.37e-11	2.15e-09
LRIG1	4611.07	-1.06886	0.162255	-6.58757	4.47e-11	2.2e-09
SYPL1	1185.54	-0.760901	0.115578	-6.58341	4.6e-11	2.25e-09
LAMB2	2101.97	-1.11826	0.170027	-6.57698	4.8e-11	2.35e-09
MYH14	447.298	-3.82928	0.582406	-6.57494	4.87e-11	2.37e-09
QKI	33488.7	-0.701212	0.106668	-6.57375	4.91e-11	2.38e-09
HEPACAM	894.585	-1.34055	0.203962	-6.57252	4.95e-11	2.4e-09
SYT6	1348.05	0.888875	0.135381	6.56575	5.18e-11	2.5e-09
DNM2	2841.08	-0.4482	0.0683037	-6.56187	5.31e-11	2.55e-09
ARHGAP24	736.6	-1.71159	0.260823	-6.56226	5.3e-11	2.55e-09
YBX3	1680.57	-1.33327	0.203489	-6.55207	5.67e-11	2.72e-09
AGTRAP	127.593	-1.2237	0.186874	-6.54824	5.82e-11	2.78e-09
MGST1	1456.75	-3.71738	0.567984	-6.54486	5.95e-11	2.83e-09
ACTN2	251.543	0.718501	0.109794	6.5441	5.99e-11	2.84e-09
PLP2	117.062	-1.3958	0.213333	-6.54282	6.04e-11	2.86e-09
EFCAB14	2188.28	-0.640792	0.0980852	-6.53302	6.45e-11	3.04e-09
PLA2G16	463.012	-1.73488	0.265584	-6.53231	6.48e-11	3.05e-09
KDELR2	5154.16	-0.43811	0.0670892	-6.53026	6.57e-11	3.08e-09
P4HA1	7245.75	-1.29811	0.198956	-6.5246	6.82e-11	3.19e-09
ATAT1	8274.4	0.469098	0.0719091	6.52349	6.87e-11	3.2e-09
MAGEH1	4705.64	-1.49841	0.229904	-6.51758	7.15e-11	3.32e-09
ITPKB	2032.88	-1.77844	0.273071	-6.51273	7.38e-11	3.41e-09
DAG1	6345.98	-0.509245	0.0781899	-6.51293	7.37e-11	3.41e-09
LAMP2	9051.31	-0.885416	0.135963	-6.51217	7.41e-11	3.42e-09
MYT1L	6664.02	0.66333	0.101931	6.50761	7.64e-11	3.51e-09
SIX5	191.401	-1.02234	0.157136	-6.50608	7.71e-11	3.54e-09
PLOD3	706.667	-0.746224	0.114756	-6.50272	7.89e-11	3.61e-09
OGFRL1	1467.91	-1.49269	0.229833	-6.49469	8.32e-11	3.79e-09
EPHA4	3344.23	1.33234	0.20522	6.49225	8.46e-11	3.84e-09
PPP1R3B	256.299	-1.13574	0.174962	-6.49135	8.51e-11	3.86e-09
TMEM114	85.026	-3.62879	0.559383	-6.48712	8.75e-11	3.96e-09
HADHA	7523.13	-0.494524	0.0762398	-6.48643	8.79e-11	3.96e-09
RREB1	254.958	-1.05256	0.162338	-6.48375	8.95e-11	4.02e-09
SRPR	3385.48	-0.776104	0.119794	-6.47866	9.25e-11	4.15e-09
KANK2	384.682	-1.30579	0.201642	-6.47578	9.43e-11	4.22e-09
ID1	56.1979	-2.06439	0.319356	-6.46421	1.02e-10	4.54e-09
HOMER1	1737.29	0.672987	0.10413	6.46292	1.03e-10	4.57e-09
TC2N	750.289	-1.70595	0.264189	-6.45733	1.07e-10	4.73e-09
VIM	49736.2	-1.18452	0.183688	-6.44855	1.13e-10	4.98e-09
FIBIN	600.982	-3.53984	0.548937	-6.44854	1.13e-10	4.98e-09
CD164	3582.27	-0.875362	0.135785	-6.44667	1.14e-10	5.03e-09
DGKB	1311.48	-0.998175	0.154845	-6.44629	1.15e-10	5.03e-09
NDP	256.632	1.1931	0.18516	6.4436	1.17e-10	5.11e-09
SLC5A12	33.0479	-2.14715	0.33328	-6.44248	1.18e-10	5.13e-09
PLCL2	2452.74	0.684285	0.106259	6.43978	1.2e-10	5.21e-09
SPG20	3517.25	-0.710354	0.110383	-6.43536	1.23e-10	5.35e-09
PCDH17	10927.7	-1.38458	0.215358	-6.42918	1.28e-10	5.55e-09
LAMC1	3072.06	-1.22514	0.190617	-6.42721	1.3e-10	5.61e-09
PMEL	59.1253	-3.19294	0.496986	-6.42461	1.32e-10	5.69e-09
PTPRB	363.719	-4.03039	0.627966	-6.41816	1.38e-10	5.93e-09
CFAP61	92.3764	-1.65098	0.257377	-6.41464	1.41e-10	6.05e-09
C1orf198	2225.51	-0.694371	0.108344	-6.40896	1.47e-10	6.26e-09
EPAS1	1367.98	-2.94591	0.459959	-6.40473	1.51e-10	6.42e-09
PLEC	4310.48	-0.688251	0.107472	-6.40401	1.51e-10	6.43e-09
LINC01094	87.0735	-2.15611	0.336799	-6.40176	1.54e-10	6.51e-09
SCAMP4	1051.62	-0.508591	0.0797094	-6.38056	1.76e-10	7.46e-09
TCTEX1D1	155.059	-2.87406	0.4505	-6.3797	1.77e-10	7.48e-09
IFIT2	805.301	-1.60557	0.251681	-6.37941	1.78e-10	7.48e-09
SIL1	804.213	-0.81063	0.127112	-6.37731	1.8e-10	7.56e-09
NR3C1	1605.9	-1.23385	0.193501	-6.37644	1.81e-10	7.59e-09
TSHZ3	1000.89	-1.31185	0.205903	-6.37122	1.88e-10	7.83e-09
CEBPD	185.305	-2.50133	0.392897	-6.3664	1.94e-10	8.06e-09
SAMD5	1506.19	-1.22718	0.192802	-6.36499	1.95e-10	8.11e-09
ELOVL6	1585.11	0.87117	0.136884	6.36432	1.96e-10	8.13e-09
DSC3	99.638	-3.05546	0.480201	-6.36288	1.98e-10	8.18e-09
SNAP25	7598.24	0.532395	0.0837577	6.35637	2.07e-10	8.52e-09
NRIP1	4365.21	0.632638	0.0995434	6.3554	2.08e-10	8.55e-09
ISCA1	2478.21	0.335557	0.0528137	6.35359	2.1e-10	8.63e-09
GPC3	1069.63	-3.42176	0.539525	-6.34218	2.27e-10	9.27e-09
PCDH10	9397.43	0.643116	0.10154	6.33365	2.39e-10	9.77e-09
C1QL1	201.216	-1.76031	0.277959	-6.33301	2.4e-10	9.79e-09
FAM182A	36.9564	-2.61778	0.413447	-6.33159	2.43e-10	9.85e-09
WBP5	2272.14	-0.648164	0.102426	-6.32811	2.48e-10	1.01e-08
NPC1	944.588	-0.711199	0.112416	-6.32652	2.51e-10	1.01e-08
AGAP7P	15.628	2.72743	0.431544	6.32018	2.61e-10	1.05e-08
EHD2	727.969	-1.99423	0.315685	-6.31716	2.66e-10	1.07e-08
DCLRE1B	864.204	0.408088	0.0646745	6.30988	2.79e-10	1.12e-08
EMP1	396.831	-2.59808	0.411991	-6.30617	2.86e-10	1.14e-08
PDIA6	4234.63	-0.404036	0.0640954	-6.30367	2.91e-10	1.16e-08
APOL1	19.9493	-4.0312	0.640049	-6.29827	3.01e-10	1.2e-08
HYOU1	8381.03	-0.579751	0.092133	-6.29254	3.12e-10	1.24e-08
SIDT2	1023.28	-0.707505	0.112483	-6.2899	3.18e-10	1.26e-08
FGD4	3633.09	0.680566	0.108265	6.2861	3.26e-10	1.29e-08
COQ2	429.005	0.591945	0.0941866	6.28481	3.28e-10	1.29e-08
STON1	779.328	-1.39415	0.221888	-6.28312	3.32e-10	1.31e-08
APOL6	61.0097	-3.47958	0.553856	-6.28246	3.33e-10	1.31e-08
TTC6	35.1387	-3.52032	0.560812	-6.27719	3.45e-10	1.35e-08
LPP	1050.19	-0.763394	0.121622	-6.27679	3.46e-10	1.35e-08
EIF1AX	8815.69	0.553934	0.0882552	6.2765	3.46e-10	1.35e-08
LOC389906	702.287	0.636258	0.101442	6.27211	3.56e-10	1.38e-08
UAP1L1	276.857	-1.84111	0.293641	-6.26992	3.61e-10	1.4e-08
TMEM44	510.962	0.730734	0.11658	6.26808	3.66e-10	1.41e-08
PCDHGA7	216.341	-5.18884	0.8292	-6.25764	3.91e-10	1.51e-08
ZFP36L1	4203.02	-0.994671	0.159124	-6.25091	4.08e-10	1.57e-08
RAB11FIP1	892.659	-1.16999	0.187182	-6.25054	4.09e-10	1.57e-08
GSTA4	5363.62	0.356345	0.0570163	6.24989	4.11e-10	1.57e-08
LINC01279	46.6086	-1.68809	0.270353	-6.24403	4.26e-10	1.63e-08
SERTAD4	585.298	1.85677	0.297624	6.23867	4.41e-10	1.68e-08
MBIP	3037.21	-0.813457	0.130383	-6.23899	4.4e-10	1.68e-08
RAB20	94.5201	-1.56785	0.251539	-6.23304	4.57e-10	1.74e-08
FERD3L	22.1332	-4.66785	0.748975	-6.23231	4.6e-10	1.74e-08
CSRNP2	4451.63	0.361045	0.0580369	6.22096	4.94e-10	1.87e-08
ACBD6	1777.62	0.321376	0.0516822	6.21832	5.03e-10	1.9e-08
FRMPD1	65.7892	1.01091	0.162593	6.21745	5.05e-10	1.9e-08
APOBEC3C	60.608	-2.01131	0.323618	-6.21505	5.13e-10	1.93e-08
FAM129A	269.786	-1.41977	0.228722	-6.20742	5.39e-10	2.01e-08
RUVBL1	1712.22	0.400848	0.0645742	6.20756	5.38e-10	2.01e-08
ZNF804A	1517.07	0.969479	0.156214	6.2061	5.43e-10	2.02e-08
ESYT1	1033.9	-0.64954	0.10471	-6.20322	5.53e-10	2.06e-08
PIGT	1359.92	-0.663284	0.106964	-6.20103	5.61e-10	2.08e-08
QPRT	620.432	-1.065	0.171859	-6.19697	5.76e-10	2.13e-08
LRRC2	62.8125	-2.40358	0.388458	-6.18749	6.11e-10	2.26e-08
SLC12A4	706.048	-0.960993	0.155407	-6.18372	6.26e-10	2.31e-08
ZNF558	574.807	-5.49471	0.888968	-6.181	6.37e-10	2.34e-08
CAV1	171.438	-2.7803	0.450506	-6.1715	6.76e-10	2.48e-08
SLC5A3	5205.12	-1.25137	0.202941	-6.16616	7e-10	2.56e-08
SP8	881.62	3.46239	0.561869	6.16228	7.17e-10	2.62e-08
NTRK2	48716.7	-1.39558	0.226844	-6.15215	7.64e-10	2.79e-08
IGSF5	221.385	-1.69193	0.275109	-6.15006	7.75e-10	2.82e-08
AR	367.179	-1.52244	0.247573	-6.14945	7.78e-10	2.82e-08
LAMP5	243.62	2.37769	0.386826	6.14665	7.91e-10	2.87e-08
SLC4A4	4590.11	-0.813759	0.132497	-6.14173	8.16e-10	2.95e-08
TEAD1	3675.59	-0.838709	0.136703	-6.13526	8.5e-10	3.06e-08
STIM1	2088.05	-0.577901	0.0942155	-6.13382	8.58e-10	3.09e-08
KIT	1645.12	0.738957	0.120503	6.13229	8.66e-10	3.11e-08
SFTA3	1110.04	-3.22117	0.525532	-6.12935	8.82e-10	3.16e-08
RARRES3	44.2929	-3.08383	0.503227	-6.12812	8.89e-10	3.18e-08
ZBTB7C	758.447	-1.59384	0.260107	-6.12761	8.92e-10	3.18e-08
TTC39C	739.459	-0.577959	0.0943589	-6.12511	9.06e-10	3.22e-08
SULF2	7232.35	-1.55661	0.254174	-6.12421	9.11e-10	3.24e-08
SLC30A8	120.274	-4.50351	0.735764	-6.12087	9.31e-10	3.3e-08
CALR	17589.8	-0.659337	0.10776	-6.11857	9.44e-10	3.34e-08
DPP7	908.871	-0.923476	0.150985	-6.11633	9.58e-10	3.38e-08
PTRF	568.74	-3.29011	0.538024	-6.11517	9.65e-10	3.39e-08
EVL	9435.18	0.37957	0.0621364	6.10865	1e-09	3.52e-08
C7orf57	51.9928	-3.10536	0.508331	-6.10894	1e-09	3.52e-08
DSG2	802.761	-1.21642	0.199185	-6.10699	1.02e-09	3.55e-08
FAM114A1	656.777	-0.900911	0.147531	-6.1066	1.02e-09	3.55e-08
CTTNBP2	914.883	0.820032	0.134537	6.09521	1.09e-09	3.8e-08
SURF4	4647.25	-0.483142	0.0792666	-6.09515	1.09e-09	3.8e-08
NEK7	1214.87	-1.19808	0.196639	-6.09282	1.11e-09	3.84e-08
PDGFC	1686.5	-1.43677	0.235804	-6.09306	1.11e-09	3.84e-08
KDELR3	118.841	-1.50807	0.247602	-6.09073	1.12e-09	3.88e-08
PCSK4	125.13	-1.33879	0.220189	-6.08021	1.2e-09	4.14e-08
LRP4	2340.53	-1.19036	0.195926	-6.07557	1.24e-09	4.25e-08
FUT8	2479.49	0.490236	0.0807845	6.06844	1.29e-09	4.43e-08
PTPN14	348.538	-0.82122	0.135364	-6.06675	1.31e-09	4.47e-08
IFIT1	563.302	-1.2801	0.211022	-6.06619	1.31e-09	4.47e-08
FRY	4459.01	0.691011	0.113914	6.06608	1.31e-09	4.47e-08
SNTB1	813.023	-1.22874	0.202573	-6.06564	1.31e-09	4.47e-08
LOC729683	234.453	0.971503	0.160186	6.06485	1.32e-09	4.48e-08
C17orf51	1245.53	0.58196	0.0959789	6.06341	1.33e-09	4.52e-08
PMEPA1	1372.53	0.827864	0.13658	6.06137	1.35e-09	4.56e-08
AGO4	3388.08	0.61597	0.101692	6.05721	1.39e-09	4.67e-08
PDGFRB	1142.12	-0.942991	0.155765	-6.05392	1.41e-09	4.76e-08
SH2D3A	52.1307	1.6638	0.275146	6.04699	1.48e-09	4.96e-08
CTSF	564.385	-5.41222	0.895496	-6.04382	1.51e-09	5.05e-08
VIP	32.9748	-4.01039	0.664273	-6.03727	1.57e-09	5.25e-08
VGLL3	534.718	-1.05706	0.175106	-6.03668	1.57e-09	5.25e-08
CNKSR2	1741.08	0.755363	0.125238	6.03143	1.63e-09	5.42e-08
IFI44L	800.352	-1.36423	0.226288	-6.02875	1.65e-09	5.5e-08
ABCC9	145.321	-1.96172	0.325495	-6.02689	1.67e-09	5.55e-08
SUSD6	674.439	-0.464334	0.0770811	-6.02397	1.7e-09	5.64e-08
CRTAP	3143.16	-0.758485	0.125976	-6.02086	1.73e-09	5.74e-08
OLFML3	33.3898	-3.4415	0.571806	-6.01865	1.76e-09	5.8e-08
LAMP1	4903.27	-0.761184	0.12649	-6.01773	1.77e-09	5.83e-08
HSPB8	481.646	-3.63878	0.604751	-6.01699	1.78e-09	5.83e-08
STON2	2375.34	-1.33713	0.222215	-6.01728	1.77e-09	5.83e-08
CBR1	646.785	-0.647257	0.107591	-6.01588	1.79e-09	5.86e-08
NCSTN	3222.22	-0.543054	0.0903451	-6.01089	1.85e-09	6.02e-08
SLC39A14	1318.95	-0.856251	0.142454	-6.01073	1.85e-09	6.02e-08
CERS2	1647.84	-0.836854	0.139295	-6.00779	1.88e-09	6.12e-08
LINC00282	56.8802	2.04696	0.340751	6.0072	1.89e-09	6.13e-08
CTSD	4273.92	-0.91113	0.151717	-6.00548	1.91e-09	6.18e-08
SOX14	126.033	-4.32658	0.72056	-6.00447	1.92e-09	6.21e-08
SOCS2	507.28	1.47527	0.245757	6.00297	1.94e-09	6.25e-08
C6orf89	5271.87	-0.446048	0.0743918	-5.99593	2.02e-09	6.52e-08
TCERG1L	237.094	-2.466	0.411672	-5.9902	2.1e-09	6.73e-08
HILPDA	1230.44	-1.05317	0.175814	-5.99024	2.1e-09	6.73e-08
FASTKD1	975.387	0.58815	0.0982098	5.98871	2.12e-09	6.77e-08
ARAF	521.928	-0.892277	0.14921	-5.98002	2.23e-09	7.13e-08
FNBP1L	17180.1	0.360693	0.0603401	5.97766	2.26e-09	7.22e-08
TRIM4	721.409	-1.04987	0.175702	-5.97529	2.3e-09	7.31e-08
DCTD	1139.7	-0.50283	0.0842284	-5.96984	2.37e-09	7.55e-08
SUCLG2	904.544	-1.04258	0.174709	-5.96754	2.41e-09	7.63e-08
SLC38A9	426.341	0.442059	0.0740757	5.96766	2.41e-09	7.63e-08
SLC9A9	309.744	-1.16631	0.19553	-5.96486	2.45e-09	7.74e-08
TGFB1	418.968	-1.28508	0.215521	-5.96268	2.48e-09	7.83e-08
ZXDA	268.838	-4.03302	0.676688	-5.95994	2.52e-09	7.94e-08
ANO6	933.9	-0.999617	0.167808	-5.9569	2.57e-09	8.08e-08
IL4R	26.8103	-2.49879	0.419505	-5.95651	2.58e-09	8.08e-08
PTPRD	4925.17	0.580756	0.0975305	5.95461	2.61e-09	8.16e-08
SCPEP1	313.189	-1.5122	0.254054	-5.95227	2.64e-09	8.26e-08
FAM84A	1145.1	0.886389	0.149068	5.94621	2.74e-09	8.56e-08
CACNA1C	1177.27	0.756014	0.127159	5.94543	2.76e-09	8.58e-08
RORA	1297.51	-0.89415	0.150422	-5.94429	2.78e-09	8.62e-08
ITIH5	928.011	-3.13497	0.52763	-5.94161	2.82e-09	8.75e-08
NAGA	579.767	-0.488641	0.0822553	-5.94054	2.84e-09	8.79e-08
CMPK2	326.531	1.01769	0.171383	5.93813	2.88e-09	8.9e-08
CASZ1	216.054	-1.00758	0.169719	-5.93679	2.91e-09	8.96e-08
CCND1	1268.7	-1.76557	0.297606	-5.93257	2.98e-09	9.18e-08
HSDL1	9876.01	0.340956	0.0575234	5.92725	3.08e-09	9.46e-08
NPY1R	435.515	1.43536	0.242203	5.92627	3.1e-09	9.48e-08
ARHGAP18	359.193	-1.25107	0.2111	-5.92645	3.1e-09	9.48e-08
CHPF	7323.81	-1.43362	0.241938	-5.92557	3.11e-09	9.5e-08
LPGAT1	4300.99	0.564177	0.0952275	5.92452	3.13e-09	9.55e-08
ATP6V0E1	1273.51	-0.914491	0.154664	-5.91275	3.36e-09	1.02e-07
IL20RA	11.343	-3.00171	0.507956	-5.90939	3.43e-09	1.04e-07
YPEL1	3611	0.57485	0.097385	5.90286	3.57e-09	1.08e-07
SERTAD4.AS1	43.1656	1.70383	0.2888	5.8997	3.64e-09	1.1e-07
AHRR	377.486	-1.19477	0.202545	-5.89878	3.66e-09	1.11e-07
PDHA1	2738.5	0.366702	0.0621883	5.89664	3.71e-09	1.12e-07
HK2	11186.5	-1.2653	0.214632	-5.8952	3.74e-09	1.13e-07
ACSF2	251.096	-0.810525	0.137563	-5.89204	3.81e-09	1.15e-07
HS2ST1	5310.36	-0.58503	0.0993177	-5.89049	3.85e-09	1.15e-07
SLC25A12	1531.59	0.475381	0.0807077	5.89017	3.86e-09	1.15e-07
NFIC	1395.13	-1.0008	0.169996	-5.8872	3.93e-09	1.17e-07
FTH1	64272.4	-0.650626	0.1106	-5.8827	4.04e-09	1.2e-07
TFF3	35.0762	-4.13803	0.703561	-5.88155	4.06e-09	1.21e-07
P4HA2	1069.94	-1.15496	0.19652	-5.87704	4.18e-09	1.24e-07
FKBP10	2223.17	-1.02446	0.174499	-5.87087	4.34e-09	1.29e-07
KLF3	1312.09	0.576885	0.0982756	5.87007	4.36e-09	1.29e-07
DENND5A	6013.16	-0.414752	0.0707246	-5.86433	4.51e-09	1.33e-07
TRHDE	244.931	1.61821	0.276058	5.86186	4.58e-09	1.35e-07
KCNJ5	79.4872	-2.23216	0.380922	-5.8599	4.63e-09	1.36e-07
LRRC6	280.771	-0.956587	0.163285	-5.85839	4.67e-09	1.37e-07
PDIA5	354.867	-1.13208	0.193308	-5.85634	4.73e-09	1.39e-07
ANXA5	3971.74	-0.920165	0.157245	-5.85178	4.86e-09	1.42e-07
CERCAM	751.047	-0.688906	0.117746	-5.85076	4.89e-09	1.43e-07
LINC00836	12.4472	-3.40455	0.582786	-5.84186	5.16e-09	1.51e-07
DRP2	617.12	0.909503	0.155772	5.83868	5.26e-09	1.53e-07
MIR124.2HG	445.582	2.05312	0.352058	5.83178	5.48e-09	1.59e-07
SLC44A1	3443.23	-0.879443	0.150847	-5.83004	5.54e-09	1.61e-07
CHRDL1	1809.77	1.75194	0.300698	5.82625	5.67e-09	1.64e-07
FOXD1	20.1762	-2.03994	0.350193	-5.82521	5.7e-09	1.65e-07
ZBED1	2123.05	0.616662	0.105859	5.82533	5.7e-09	1.65e-07
PRDM13	12.8458	-4.20543	0.722101	-5.82388	5.75e-09	1.66e-07
ANKRD29	67.3893	1.37724	0.236757	5.8171	5.99e-09	1.72e-07
TPP1	3186.19	-1.0587	0.18203	-5.81611	6.02e-09	1.73e-07
ZADH2	2143.6	0.79658	0.137091	5.8106	6.23e-09	1.78e-07
FAM102B	2925.88	0.715686	0.123222	5.80808	6.32e-09	1.81e-07
TACC1	3199.5	-0.622276	0.107207	-5.80442	6.46e-09	1.84e-07
TMTC4	2515.34	0.626135	0.107909	5.80243	6.54e-09	1.86e-07
MGP	32.313	-5.74005	0.989519	-5.80085	6.6e-09	1.88e-07
NAAA	167.919	-0.845802	0.145864	-5.79857	6.69e-09	1.9e-07
SRPX2	19.9261	-3.19951	0.551827	-5.79803	6.71e-09	1.9e-07
HPSE2	20.5017	-3.15782	0.545131	-5.79278	6.92e-09	1.96e-07
SHD	732.683	0.521658	0.0900843	5.79077	7.01e-09	1.98e-07
TSHR	74.1613	-2.09154	0.361332	-5.78841	7.11e-09	2.01e-07
IGFBP7	480.075	-2.91659	0.504141	-5.78526	7.24e-09	2.04e-07
TSPAN3	16824.8	-0.57547	0.0995125	-5.78289	7.34e-09	2.06e-07
EMP3	134.79	-1.45226	0.251127	-5.78296	7.34e-09	2.06e-07
TP53I11	3371.27	0.49288	0.0852393	5.78231	7.37e-09	2.06e-07
PCDHGA8	92.7255	-1.3956	0.241354	-5.78237	7.37e-09	2.06e-07
ADARB1	1317.58	0.578197	0.100005	5.78168	7.4e-09	2.07e-07
SLFN13	23.0677	-3.28348	0.56799	-5.78088	7.43e-09	2.07e-07
FAH	183.244	-0.87424	0.151337	-5.77677	7.61e-09	2.12e-07
BIVM	1138.41	0.444273	0.0769607	5.77272	7.8e-09	2.17e-07
GNA12	4121.15	-0.381919	0.0661677	-5.77198	7.83e-09	2.17e-07
PLXDC2	2285.99	-0.991345	0.171797	-5.77044	7.91e-09	2.19e-07
VKORC1	746.888	-0.579611	0.100442	-5.77063	7.9e-09	2.19e-07
ZNF37BP	1364.79	0.840117	0.145724	5.76512	8.16e-09	2.25e-07
SNHG18	143.843	-1.4451	0.250711	-5.76402	8.21e-09	2.26e-07
NACC2	1387.66	-0.71141	0.123484	-5.76115	8.35e-09	2.3e-07
RNASE4	259.978	-1.14424	0.198634	-5.76052	8.39e-09	2.3e-07
SLC39A7	5087.76	-0.383287	0.0665364	-5.76056	8.38e-09	2.3e-07
GLRA2	2299.92	0.699145	0.121609	5.74913	8.97e-09	2.46e-07
GPRC5A	60.9417	-2.55348	0.444202	-5.74846	9.01e-09	2.46e-07
NUP50.AS1	327.088	0.806816	0.140347	5.74872	8.99e-09	2.46e-07
PER3	1199.38	-0.641352	0.11162	-5.74586	9.15e-09	2.49e-07
TXLNB	309.141	-2.96847	0.516745	-5.74456	9.22e-09	2.51e-07
ARMC3	301.599	-2.92864	0.510264	-5.73945	9.5e-09	2.58e-07
ANGPTL7	7.45907	-3.813	0.664837	-5.73525	9.74e-09	2.64e-07
TSC22D4	740.816	-0.938027	0.163698	-5.73023	1e-08	2.71e-07
SLC41A1	1498.15	-0.568859	0.0993035	-5.72848	1.01e-08	2.73e-07
KIAA1841	919.392	0.544288	0.0950119	5.72863	1.01e-08	2.73e-07
MPDZ	3338.68	-0.560866	0.0979125	-5.72824	1.01e-08	2.73e-07
PRICKLE3	35.6799	-2.04218	0.35649	-5.72857	1.01e-08	2.73e-07
ZNF474	213.926	-1.20284	0.210152	-5.72368	1.04e-08	2.8e-07
ANXA2P2	19.4003	-2.66294	0.465691	-5.71826	1.08e-08	2.88e-07
SNAP23	292.198	-0.75135	0.131465	-5.71522	1.1e-08	2.93e-07
CNTNAP2	12802.3	1.00936	0.176697	5.71235	1.11e-08	2.98e-07
ARHGEF7	8716.86	0.435669	0.0763201	5.70844	1.14e-08	3.04e-07
ZBTB8A	1908.19	0.521044	0.0913669	5.70276	1.18e-08	3.14e-07
LHFPL1	42.7711	-2.02678	0.355453	-5.70197	1.18e-08	3.15e-07
STOM	481.958	-1.09321	0.191807	-5.69955	1.2e-08	3.19e-07
BCAM	655.748	-1.06828	0.18749	-5.69777	1.21e-08	3.21e-07
NEBL	4775.24	-1.42583	0.250319	-5.69605	1.23e-08	3.24e-07
DOCK3	3265.12	0.597804	0.104986	5.69411	1.24e-08	3.27e-07
SNED1	142.39	-2.0542	0.360807	-5.69335	1.25e-08	3.28e-07
RNF182	893.447	-1.32329	0.232476	-5.69214	1.25e-08	3.3e-07
ABRACL	434.4	0.813607	0.142995	5.68976	1.27e-08	3.34e-07
SYNGAP1	3370.54	0.450466	0.0791886	5.68852	1.28e-08	3.36e-07
GLTP	1037.18	-0.475747	0.0836438	-5.68777	1.29e-08	3.37e-07
SCGN	854.714	2.5239	0.443895	5.6858	1.3e-08	3.4e-07
PIFO	671.127	-1.91075	0.336347	-5.68089	1.34e-08	3.5e-07
CXCL16	138.109	-0.90918	0.160079	-5.67958	1.35e-08	3.52e-07
LAMA5	733.123	-0.78013	0.13737	-5.67905	1.35e-08	3.52e-07
ANKFN1	217.244	-1.06556	0.187658	-5.67824	1.36e-08	3.54e-07
SLC2A3	6912.46	-1.13424	0.199778	-5.6775	1.37e-08	3.55e-07
TPPP3	480.181	-1.75085	0.308409	-5.67703	1.37e-08	3.55e-07
CALD1	2974.72	-0.880307	0.155109	-5.67541	1.38e-08	3.58e-07
OLFML2A	306.955	-3.01568	0.531489	-5.67402	1.39e-08	3.6e-07
SLFN12	104.917	-2.09574	0.369466	-5.67236	1.41e-08	3.63e-07
CHST3	2027.13	-0.621197	0.109533	-5.67134	1.42e-08	3.65e-07
SLITRK6	747.698	2.09358	0.369186	5.6708	1.42e-08	3.65e-07
MAGI1	4829.54	0.466014	0.0822209	5.66783	1.45e-08	3.71e-07
SFRP2	506.638	-1.24968	0.220596	-5.66501	1.47e-08	3.77e-07
POMGNT2	1872.67	-0.50893	0.0898417	-5.66474	1.47e-08	3.77e-07
NR1H2	1027.37	-0.548218	0.0967897	-5.66401	1.48e-08	3.77e-07
ZNF385B	163.098	1.23163	0.21745	5.66397	1.48e-08	3.77e-07
PDIA4	4306.94	-0.621852	0.109829	-5.66202	1.5e-08	3.81e-07
WDR11	1711.4	0.419764	0.0741418	5.66163	1.5e-08	3.81e-07
ASB1	2440.56	-0.38598	0.0681825	-5.66099	1.51e-08	3.82e-07
RASGRP2	408.195	1.00798	0.178077	5.66035	1.51e-08	3.82e-07
ZBTB16	282.208	-1.1286	0.199386	-5.6604	1.51e-08	3.82e-07
LINC01515	31.048	-2.37302	0.419387	-5.65832	1.53e-08	3.86e-07
C4orf33	474.915	0.603069	0.106625	5.65598	1.55e-08	3.91e-07
CFAP52	117.12	-2.38752	0.422292	-5.6537	1.57e-08	3.95e-07
PSMB8	45.9896	-1.67586	0.296416	-5.65375	1.57e-08	3.95e-07
VASN	140.999	-1.25436	0.221939	-5.65184	1.59e-08	3.98e-07
CMTM8	109.293	-1.88381	0.33338	-5.65063	1.6e-08	4.01e-07
CHST10	1718	0.500746	0.088706	5.645	1.65e-08	4.13e-07
ACADVL	1714.67	-0.746289	0.132369	-5.63795	1.72e-08	4.29e-07
HSD17B11	530.076	-0.735423	0.130438	-5.6381	1.72e-08	4.29e-07
LINC00890	46.0251	-3.49318	0.61988	-5.63525	1.75e-08	4.35e-07
BTG2	1883.04	-0.640468	0.11367	-5.63445	1.76e-08	4.37e-07
STC2	4050.93	-1.38373	0.245623	-5.63355	1.77e-08	4.38e-07
FBXO8	851.641	-0.61186	0.108622	-5.63291	1.77e-08	4.39e-07
HS6ST1	4277.26	0.449725	0.0798431	5.63261	1.78e-08	4.4e-07
BCL11A	2959.81	1.47606	0.262165	5.63027	1.8e-08	4.45e-07
PIGS	1382.92	-0.475388	0.0844392	-5.62995	1.8e-08	4.45e-07
ITM2B	14008.6	-0.653665	0.116154	-5.62755	1.83e-08	4.51e-07
FAM78B	130.426	1.01991	0.181273	5.62638	1.84e-08	4.53e-07
CD44	928.683	-1.44123	0.256182	-5.6258	1.85e-08	4.53e-07
FOXA1	293.802	-5.67381	1.00849	-5.62605	1.84e-08	4.53e-07
LCA5	1248.55	-0.525403	0.0934203	-5.62407	1.87e-08	4.57e-07
PTTG1IP	6977.38	-0.598261	0.106413	-5.62208	1.89e-08	4.61e-07
PPAP2A	397.576	-1.44724	0.257429	-5.62189	1.89e-08	4.61e-07
TMEM132B	1500.29	-1.20862	0.215094	-5.61902	1.92e-08	4.68e-07
BMPR1B	654.941	-1.08339	0.192861	-5.61747	1.94e-08	4.72e-07
DPY19L4	1897.66	-0.56144	0.0999895	-5.61498	1.97e-08	4.78e-07
GM2A	1807.26	-0.826036	0.147134	-5.61419	1.97e-08	4.79e-07
PCAT7	59.2491	-1.65284	0.29441	-5.61407	1.98e-08	4.79e-07
SYPL2	20.8814	-2.72039	0.484764	-5.61178	2e-08	4.84e-07
TMEM255A	2185.3	-1.17743	0.209809	-5.6119	2e-08	4.84e-07
SEL1L3	1000.74	1.47183	0.262348	5.61022	2.02e-08	4.87e-07
GTF2H5	2475.76	0.443816	0.079106	5.6104	2.02e-08	4.87e-07
SGMS2	155.464	-1.80718	0.322335	-5.60654	2.06e-08	4.97e-07
EGLN3	1498	-0.961925	0.171669	-5.60336	2.1e-08	5.05e-07
LMCD1	137.237	-1.57892	0.281797	-5.60304	2.11e-08	5.05e-07
RGMA	7782.16	-0.707857	0.126347	-5.6025	2.11e-08	5.06e-07
PDE4B	3953.09	0.743514	0.132928	5.59334	2.23e-08	5.33e-07
IGFBPL1	5514.01	0.899136	0.160785	5.59217	2.24e-08	5.36e-07
FAM218A	286.949	1.01516	0.181742	5.58572	2.33e-08	5.55e-07
ZNF736	440.299	-4.43806	0.7947	-5.58456	2.34e-08	5.58e-07
LRRK2	214.727	-1.30106	0.232988	-5.58422	2.35e-08	5.58e-07
NR4A1	401.464	-0.755697	0.135344	-5.58354	2.36e-08	5.58e-07
LMAN1	5022.3	-0.672268	0.120401	-5.5836	2.36e-08	5.58e-07
C3orf70	1872.26	0.684804	0.122648	5.5835	2.36e-08	5.58e-07
LMBRD1	3510.55	-0.711723	0.127497	-5.58227	2.37e-08	5.62e-07
DNAJB5	2922.38	0.356217	0.0638498	5.57899	2.42e-08	5.71e-07
ZNF436	3403.21	0.441061	0.0790699	5.57811	2.43e-08	5.73e-07
IGFBP5	52168.7	-2.75823	0.495453	-5.56709	2.59e-08	6.1e-07
SPICE1	628.78	-0.636035	0.114294	-5.5649	2.62e-08	6.17e-07
NUCB1	2756.39	-0.536694	0.0964748	-5.56305	2.65e-08	6.23e-07
TMEM263	4069.08	-0.619051	0.11131	-5.5615	2.67e-08	6.27e-07
PROK2	24.9387	1.87552	0.337263	5.561	2.68e-08	6.28e-07
BCL3	125.388	-0.970274	0.174662	-5.55517	2.77e-08	6.48e-07
SMIM10L1	1284.35	0.49812	0.0897802	5.54822	2.89e-08	6.74e-07
ADGRV1	5590.29	-0.969116	0.174783	-5.5447	2.94e-08	6.87e-07
PLCD1	919.586	-0.658573	0.118822	-5.54253	2.98e-08	6.94e-07
FTL	20378.3	-0.991955	0.17908	-5.53916	3.04e-08	7.07e-07
IL6ST	7076.32	-0.876644	0.158367	-5.53551	3.1e-08	7.2e-07
WASF1	5551.46	0.410623	0.0741967	5.53425	3.13e-08	7.25e-07
SPRY2	1253.92	-0.55506	0.100301	-5.53396	3.13e-08	7.25e-07
WFS1	1406.09	-1.04048	0.188154	-5.52997	3.2e-08	7.4e-07
SSH3	158.812	-1.08622	0.196499	-5.52784	3.24e-08	7.48e-07
MITF	161.916	-1.69334	0.306423	-5.52614	3.27e-08	7.55e-07
PVRL3	2039.15	-1.27218	0.230223	-5.52585	3.28e-08	7.55e-07
CDH20	411.842	1.24006	0.22446	5.52464	3.3e-08	7.57e-07
FHL2	124.272	-1.03107	0.186624	-5.52484	3.3e-08	7.57e-07
EFHD1	740.763	-1.66074	0.300601	-5.52475	3.3e-08	7.57e-07
SPIRE2	729.345	0.526698	0.0953547	5.52356	3.32e-08	7.6e-07
PENK	90.3674	2.17342	0.393729	5.52009	3.39e-08	7.75e-07
HADHB	3199.07	-0.886765	0.160655	-5.51969	3.4e-08	7.75e-07
LGI3	662.06	-1.724	0.312403	-5.51854	3.42e-08	7.79e-07
LDOC1	1647	-5.63985	1.02201	-5.51837	3.42e-08	7.79e-07
TFRC	7190.64	-0.81041	0.146869	-5.51791	3.43e-08	7.8e-07
FLG.AS1	18.6273	-3.13241	0.568266	-5.51223	3.54e-08	8.04e-07
GPR37L1	150.542	-2.01473	0.365551	-5.51148	3.56e-08	8.07e-07
ELMO1	2178.9	0.609346	0.110607	5.50909	3.61e-08	8.17e-07
SLC2A1	7536.18	-1.92377	0.349439	-5.50532	3.69e-08	8.32e-07
NOL3	362.741	-1.24345	0.225857	-5.50547	3.68e-08	8.32e-07
KIN	562.358	0.425291	0.0772671	5.50417	3.71e-08	8.36e-07
AHR	611.686	-1.28602	0.233677	-5.50342	3.72e-08	8.39e-07
PIEZO1	155.203	-0.94545	0.171979	-5.49747	3.85e-08	8.66e-07
LRRC37B	899.593	0.421159	0.0766332	5.49578	3.89e-08	8.72e-07
ZNF302	2396.32	0.573569	0.104366	5.49576	3.89e-08	8.72e-07
WIPF1	589.797	-0.750594	0.136615	-5.49422	3.92e-08	8.79e-07
BTN3A3	214.943	-0.908236	0.165315	-5.49398	3.93e-08	8.79e-07
FLJ10038	1048.46	0.681746	0.124188	5.48962	4.03e-08	8.99e-07
HSPA1L	240.802	-1.9845	0.361522	-5.4893	4.04e-08	8.99e-07
RNF216P1	825.944	0.422994	0.0770571	5.48935	4.03e-08	8.99e-07
NIM1K	947.749	-0.632561	0.115256	-5.48833	4.06e-08	9.02e-07
VCAM1	6979.59	-1.2408	0.226096	-5.48794	4.07e-08	9.03e-07
TLR4	206.33	-3.08932	0.563015	-5.48709	4.09e-08	9.06e-07
ZNF248	826.22	-1.53373	0.279555	-5.48633	4.1e-08	9.09e-07
KCNN3	2720.58	-0.94082	0.171882	-5.47365	4.41e-08	9.75e-07
SDF4	3204.66	-0.477215	0.0872866	-5.46722	4.57e-08	1.01e-06
C11orf70	92.8659	-1.70523	0.31196	-5.4662	4.6e-08	1.01e-06
RRAS	114.661	-1.2991	0.237872	-5.46135	4.73e-08	1.04e-06
AAMDC	156.086	-0.723358	0.132555	-5.45706	4.84e-08	1.06e-06
PPM1E	6907.48	0.630746	0.115608	5.4559	4.87e-08	1.07e-06
ITGA4	23.1818	-2.18297	0.400111	-5.45592	4.87e-08	1.07e-06
OCA2	102.526	-1.38084	0.253119	-5.45531	4.89e-08	1.07e-06
PRR19	50.9138	1.03994	0.190687	5.45365	4.93e-08	1.08e-06
CTNNA1	11267	-0.58896	0.108055	-5.45055	5.02e-08	1.1e-06
PBX3	7711.17	1.515	0.277968	5.45027	5.03e-08	1.1e-06
TRAM1	3486.45	-0.630504	0.115716	-5.44872	5.07e-08	1.11e-06
CERKL	37.5379	-3.16529	0.581155	-5.44656	5.14e-08	1.12e-06
HHIP	44.7544	-1.69302	0.311103	-5.44199	5.27e-08	1.15e-06
C9orf171	49.3214	-2.45283	0.450822	-5.44079	5.3e-08	1.15e-06
DAAM2	277.553	-1.88138	0.345984	-5.43775	5.4e-08	1.17e-06
MAPK4	3024.18	-1.10258	0.202844	-5.43562	5.46e-08	1.18e-06
DNAJC9	1425.07	0.451451	0.0830902	5.43326	5.53e-08	1.2e-06
ARC	433.695	-0.7627	0.140433	-5.43106	5.6e-08	1.21e-06
GNG12	1983.42	-1.17522	0.216534	-5.42743	5.72e-08	1.23e-06
SGPP2	204.216	-1.60797	0.296316	-5.42654	5.75e-08	1.24e-06
RERG	221.855	-2.24279	0.413455	-5.4245	5.81e-08	1.25e-06
CCZ1	726.245	0.564687	0.104097	5.42459	5.81e-08	1.25e-06
ACTL6B	1450.44	0.680292	0.125424	5.42393	5.83e-08	1.25e-06
WDR45B	5055.08	-0.36915	0.0680861	-5.42181	5.9e-08	1.26e-06
NKD1	411.917	-1.2521	0.231007	-5.42018	5.95e-08	1.27e-06
SNHG7	713.31	-0.739789	0.13652	-5.41892	6e-08	1.28e-06
SEMA3F	396.059	0.870355	0.160685	5.41653	6.08e-08	1.3e-06
ITFG3	2057.11	-0.516837	0.0955516	-5.40898	6.34e-08	1.35e-06
POFUT2	1219.62	-0.642535	0.118801	-5.40849	6.36e-08	1.35e-06
LRRC7	1582.9	0.611834	0.113146	5.40748	6.39e-08	1.36e-06
MED17	1534.49	0.515199	0.0953532	5.40306	6.55e-08	1.39e-06
FHIT	80.2915	-1.62674	0.301123	-5.40226	6.58e-08	1.4e-06
LAMA2	322.392	-3.50825	0.649523	-5.40127	6.62e-08	1.4e-06
TIFA	309.042	1.10174	0.20399	5.40094	6.63e-08	1.4e-06
RRAGD	5479.41	-0.671627	0.124426	-5.39782	6.75e-08	1.42e-06
FAM117A	170.428	-0.669234	0.123999	-5.39711	6.77e-08	1.43e-06
RIMS2	1255.93	0.564852	0.104674	5.39632	6.8e-08	1.43e-06
IL5RA	18.8801	-2.64046	0.48957	-5.39341	6.91e-08	1.45e-06
ANXA4	265.434	-0.857302	0.158965	-5.39303	6.93e-08	1.46e-06
RSPH1	320.818	-1.89962	0.35238	-5.39083	7.01e-08	1.47e-06
LOC100128239	84.2107	1.15442	0.214249	5.38824	7.12e-08	1.49e-06
ITGA11	26.8118	-2.52435	0.468722	-5.38561	7.22e-08	1.51e-06
AKAP1	2058.9	-0.584655	0.108571	-5.38497	7.25e-08	1.51e-06
FKBP5	407.826	-1.3615	0.252918	-5.38318	7.32e-08	1.53e-06
POLB	1467.41	0.417751	0.0776282	5.38143	7.39e-08	1.54e-06
KIAA1549L	4462.38	0.446804	0.0830337	5.38099	7.41e-08	1.54e-06
MT1X	108.125	-1.8388	0.341772	-5.38019	7.44e-08	1.55e-06
NECAP2	522.043	-0.623353	0.115986	-5.37436	7.69e-08	1.6e-06
RIN2	553.976	-0.586709	0.109171	-5.3742	7.69e-08	1.6e-06
SUZ12P1	676.36	0.467389	0.0870647	5.3683	7.95e-08	1.65e-06
EDNRB	11961.7	-2.22095	0.413831	-5.36681	8.01e-08	1.66e-06
FAM50B	150.529	-1.2376	0.230902	-5.35987	8.33e-08	1.72e-06
DBI	1240.44	0.679741	0.126848	5.35872	8.38e-08	1.73e-06
SPSB1	217.297	-0.637737	0.119071	-5.35596	8.51e-08	1.75e-06
CANX	49499.7	-0.566611	0.105789	-5.35603	8.51e-08	1.75e-06
GHR	190.965	-0.991847	0.185218	-5.35502	8.55e-08	1.76e-06
REEP3	1215.51	-1.01028	0.188698	-5.35397	8.6e-08	1.77e-06
CACNA1E	3135.71	0.683858	0.127799	5.35104	8.75e-08	1.79e-06
SND1	7059.29	-0.333551	0.0623426	-5.35029	8.78e-08	1.8e-06
ANKRD30BL	18.8404	-3.17577	0.594041	-5.34604	8.99e-08	1.84e-06
MANBA	1639.42	-0.661456	0.123796	-5.34309	9.14e-08	1.87e-06
TRABD2B	41.2214	-3.45937	0.647625	-5.34162	9.21e-08	1.88e-06
ZNF48	1411.41	0.50044	0.0936993	5.34091	9.25e-08	1.88e-06
C1orf158	32.5337	-2.70678	0.5074	-5.3346	9.58e-08	1.95e-06
TMLHE	452.838	-0.484217	0.090864	-5.32903	9.87e-08	2.01e-06
ZNF275	1768.42	-0.383596	0.0720086	-5.32708	9.98e-08	2.03e-06
CDKN1A	7880.41	-1.3944	0.262009	-5.32196	1.03e-07	2.08e-06
TCEA3	58.9023	-1.76806	0.332327	-5.32025	1.04e-07	2.1e-06
PAIP1	5319.84	0.325072	0.0611131	5.31918	1.04e-07	2.11e-06
CFAP57	79.095	-1.57302	0.296057	-5.31325	1.08e-07	2.18e-06
ALDOC	3184.24	-0.998671	0.188107	-5.30906	1.1e-07	2.22e-06
FAM57A	835.343	-0.427338	0.0805285	-5.30667	1.12e-07	2.25e-06
TCP11L2	543.139	-0.504773	0.0951624	-5.30433	1.13e-07	2.28e-06
ZNF33B	1811.31	0.561199	0.10582	5.30336	1.14e-07	2.29e-06
ZFP28	1799.11	-4.36289	0.822709	-5.30309	1.14e-07	2.29e-06
KIAA0753	1092.68	0.461881	0.0871081	5.3024	1.14e-07	2.29e-06
ZMYND8	3853.34	0.419587	0.0791416	5.30173	1.15e-07	2.3e-06
TNIP1	2258.14	-0.662152	0.124981	-5.29802	1.17e-07	2.34e-06
SLC47A2	30.5002	-1.32126	0.249453	-5.29661	1.18e-07	2.36e-06
MNS1	283.629	-1.31411	0.248247	-5.29354	1.2e-07	2.39e-06
TAP1	268.089	-0.80629	0.152414	-5.29013	1.22e-07	2.44e-06
MBNL2	1575.38	-0.905744	0.171319	-5.2869	1.24e-07	2.48e-06
DEPTOR	379.432	-1.08479	0.20521	-5.28627	1.25e-07	2.48e-06
CROCCP2	466.196	0.854162	0.161672	5.28331	1.27e-07	2.52e-06
WT1	19.8779	-3.45708	0.654432	-5.28257	1.27e-07	2.53e-06
DYRK3	641.881	-0.972216	0.184282	-5.2757	1.32e-07	2.62e-06
WDR38	26.3821	-3.42809	0.649834	-5.27533	1.33e-07	2.62e-06
CAB39L	1948.77	0.489241	0.0927614	5.27419	1.33e-07	2.64e-06
SLC7A2	461.685	-1.41094	0.267567	-5.27323	1.34e-07	2.65e-06
LGALS3BP	1984.46	-0.945179	0.179338	-5.27038	1.36e-07	2.68e-06
TTC29	72.9115	-2.09737	0.398132	-5.26803	1.38e-07	2.72e-06
PPIB	847.644	-0.516637	0.0980782	-5.2676	1.38e-07	2.72e-06
SMPD1	1401.53	-0.744752	0.141484	-5.26386	1.41e-07	2.77e-06
LYPD1	697.602	-1.30209	0.247366	-5.26382	1.41e-07	2.77e-06
FOXD4	37.7088	1.4252	0.270925	5.26049	1.44e-07	2.82e-06
TIMP1	431.757	-1.39323	0.264921	-5.25906	1.45e-07	2.83e-06
PCDHGA10	729.663	0.766438	0.145749	5.25861	1.45e-07	2.84e-06
SLC16A3	1577.53	-1.44725	0.275248	-5.25797	1.46e-07	2.84e-06
COCH	197.805	0.622828	0.118493	5.25624	1.47e-07	2.87e-06
ARHGEF6	1547.06	-0.786718	0.149689	-5.2557	1.47e-07	2.87e-06
MSX1	68.5467	-1.61924	0.308236	-5.25326	1.49e-07	2.91e-06
SUMF1	217.85	-1.1471	0.218482	-5.25031	1.52e-07	2.95e-06
NR3C2	565.196	-1.38703	0.264443	-5.2451	1.56e-07	3.03e-06
FAM181A	84.652	-1.17303	0.223697	-5.24382	1.57e-07	3.05e-06
MAP3K19	146.913	-3.21259	0.612822	-5.2423	1.59e-07	3.07e-06
DAZAP2	5295.96	-0.418295	0.0798249	-5.24016	1.6e-07	3.1e-06
ZNF835	181.488	-3.86388	0.737728	-5.23755	1.63e-07	3.14e-06
SLC2A12	938.498	-1.18412	0.226128	-5.23652	1.64e-07	3.16e-06
TMEM55A	1563.1	-0.418283	0.0798833	-5.23617	1.64e-07	3.16e-06
HAP1	886.704	-1.11443	0.213027	-5.23139	1.68e-07	3.24e-06
ZNF229	772.342	-4.86021	0.929147	-5.23083	1.69e-07	3.25e-06
ZNF267	422.307	-0.634456	0.121311	-5.23	1.7e-07	3.26e-06
TWSG1	1724.69	-0.593108	0.113422	-5.22921	1.7e-07	3.26e-06
BTN3A2	413.915	-1.01785	0.194652	-5.22908	1.7e-07	3.26e-06
DNAJB9	3556.36	-0.883324	0.168962	-5.22796	1.71e-07	3.28e-06
CPXM2	2133.19	-3.24935	0.621789	-5.22581	1.73e-07	3.32e-06
UNC5B	2173.76	-1.43269	0.27424	-5.22422	1.75e-07	3.34e-06
RMST	209.232	-1.0723	0.205256	-5.22418	1.75e-07	3.34e-06
KLHL32	573.381	-0.688984	0.131899	-5.22358	1.75e-07	3.34e-06
SCN1A	1401.4	-0.603797	0.115679	-5.21957	1.79e-07	3.41e-06
GOLIM4	2847.21	-0.731671	0.140257	-5.21666	1.82e-07	3.46e-06
ZNF667.AS1	1097.89	-4.8637	0.932415	-5.21624	1.83e-07	3.47e-06
ESRRG	605.012	1.20003	0.230077	5.21578	1.83e-07	3.47e-06
SOX4	63380.5	0.908602	0.174288	5.21322	1.86e-07	3.52e-06
APOBEC3G	7.26964	-3.50817	0.673139	-5.21167	1.87e-07	3.54e-06
LRRC61	108.101	-4.42867	0.850035	-5.20999	1.89e-07	3.57e-06
SP110	71.5659	-1.04886	0.201397	-5.20792	1.91e-07	3.61e-06
ZNF124	329.329	0.964375	0.185261	5.20549	1.93e-07	3.64e-06
SLC40A1	1020.17	-0.650391	0.124944	-5.20545	1.94e-07	3.64e-06
CENPJ	779.891	0.698216	0.134166	5.20412	1.95e-07	3.67e-06
TNFRSF1A	855.857	-0.92499	0.177829	-5.20157	1.98e-07	3.71e-06
MEGF10	3638.74	-0.647124	0.124411	-5.20149	1.98e-07	3.71e-06
CADM2	8719.37	1.05557	0.203025	5.19921	2e-07	3.75e-06
PRAF2	1455.88	-0.559982	0.107724	-5.19829	2.01e-07	3.77e-06
PHACTR3	2013.39	0.650068	0.12507	5.19765	2.02e-07	3.78e-06
MAN1C1	516.452	-0.863875	0.166225	-5.19702	2.03e-07	3.78e-06
RABL2B	1071.18	0.357152	0.0688008	5.19111	2.09e-07	3.9e-06
FUT9	7369.04	0.631388	0.121657	5.18988	2.1e-07	3.92e-06
TAGLN	96.6133	-0.745116	0.143602	-5.18874	2.12e-07	3.94e-06
ZDHHC23	133.134	0.931205	0.179622	5.18425	2.17e-07	4.03e-06
PAPLN	117.885	-2.33079	0.449703	-5.18296	2.18e-07	4.06e-06
EXT2	2880.99	-0.262047	0.0505771	-5.18115	2.21e-07	4.09e-06
NAGLU	644.086	-0.905253	0.174744	-5.18046	2.21e-07	4.1e-06
GBE1	1102.9	-0.900842	0.173911	-5.17991	2.22e-07	4.11e-06
GNA13	5070.61	-0.63194	0.122014	-5.17926	2.23e-07	4.12e-06
CFAP126	812.75	-0.485983	0.0939039	-5.17532	2.28e-07	4.2e-06
RABIF	689.148	0.577311	0.111596	5.17324	2.3e-07	4.25e-06
NCAM2	3765.36	0.692954	0.134012	5.17082	2.33e-07	4.29e-06
TIAM2	316.126	2.38723	0.461669	5.17086	2.33e-07	4.29e-06
FRMD7	16.908	3.01939	0.584218	5.16827	2.36e-07	4.35e-06
RHOC	1471.8	-0.719806	0.139329	-5.16625	2.39e-07	4.38e-06
PCDHA9	59.556	1.31123	0.253811	5.16617	2.39e-07	4.38e-06
SLC17A5	1256.99	-0.570439	0.110409	-5.16658	2.38e-07	4.38e-06
CNTNAP4	2553.28	0.69283	0.134138	5.16507	2.4e-07	4.4e-06
ST13	18345.5	-0.35199	0.0681511	-5.16485	2.41e-07	4.4e-06
DPP6	5129.29	-0.739002	0.143127	-5.16325	2.43e-07	4.43e-06
KIF1C	1049.09	-0.580538	0.112488	-5.16087	2.46e-07	4.49e-06
WDR47	8636.99	0.423898	0.0821509	5.15999	2.47e-07	4.5e-06
PDZD4	13996	0.399622	0.0774468	5.15996	2.47e-07	4.5e-06
ZNF607	929.814	0.393646	0.0762984	5.15929	2.48e-07	4.51e-06
MEIS1	515.672	1.63808	0.317825	5.15403	2.55e-07	4.63e-06
KAZN	1689.21	-0.491494	0.0953654	-5.1538	2.55e-07	4.63e-06
RASL12	12.8226	-3.91248	0.759904	-5.14865	2.62e-07	4.76e-06
QSOX1	1554.66	-0.514496	0.0999324	-5.14844	2.63e-07	4.76e-06
FADS1	6052.03	-0.34337	0.0667248	-5.14606	2.66e-07	4.81e-06
NR2F1.AS1	690.286	-2.06203	0.400972	-5.14258	2.71e-07	4.9e-06
YTHDC2	1713.58	0.505733	0.0983678	5.14124	2.73e-07	4.93e-06
MCHR1	191.191	-1.67958	0.326738	-5.14045	2.74e-07	4.94e-06
NEU1	973.31	-0.79473	0.154681	-5.13786	2.78e-07	5e-06
CHMP7	2707.59	0.27595	0.0537116	5.13763	2.78e-07	5e-06
LHX9	99.061	-1.54635	0.301083	-5.13596	2.81e-07	5.04e-06
WAC.AS1	1898.99	0.433244	0.0843814	5.13435	2.83e-07	5.08e-06
TRPC3	184.628	0.700135	0.136397	5.13308	2.85e-07	5.11e-06
TGFBR2	30.1345	-2.92338	0.569833	-5.13023	2.89e-07	5.18e-06
SUDS3	2655.93	0.311021	0.0606445	5.1286	2.92e-07	5.22e-06
B4GALT4	994.727	-0.607283	0.118415	-5.12843	2.92e-07	5.22e-06
ZNF331	1588.06	-0.486721	0.0949435	-5.12643	2.95e-07	5.27e-06
KIAA0141	903.47	-0.417418	0.0814757	-5.12323	3e-07	5.35e-06
GAS2L1	266.918	-0.886535	0.173138	-5.12039	3.05e-07	5.43e-06
SOX2	20037.2	-0.629576	0.12301	-5.11808	3.09e-07	5.49e-06
RHPN2	1066.52	-0.74336	0.145275	-5.1169	3.11e-07	5.52e-06
HAS2.AS1	31.4579	-1.88092	0.367597	-5.11681	3.11e-07	5.52e-06
LEMD1	138.31	1.17836	0.230366	5.11515	3.13e-07	5.56e-06
LOC102723828	41.1767	-3.58098	0.700433	-5.11252	3.18e-07	5.63e-06
ENTPD2	30.8451	-1.99883	0.391033	-5.11167	3.19e-07	5.65e-06
MMD2	252.978	0.81883	0.160233	5.11023	3.22e-07	5.69e-06
SCARF2	501.241	-1.03956	0.203449	-5.10968	3.23e-07	5.7e-06
CDC14B	705.34	-0.735323	0.143937	-5.10866	3.24e-07	5.72e-06
FBXW11	8394.7	-0.27988	0.0547898	-5.10824	3.25e-07	5.73e-06
DNAH9	198.75	-1.41809	0.277765	-5.10536	3.3e-07	5.81e-06
MOXD1	1932.08	1.13416	0.222219	5.10378	3.33e-07	5.85e-06
PLIN2	371.53	-0.840439	0.164719	-5.10227	3.36e-07	5.89e-06
ZNF718	542.301	0.813473	0.159498	5.10022	3.39e-07	5.94e-06
FAXC	2831.95	0.46527	0.0912226	5.10038	3.39e-07	5.94e-06
FAR2	427.234	0.839932	0.164784	5.09718	3.45e-07	6.03e-06
POMT2	1042.89	-0.567237	0.111285	-5.09714	3.45e-07	6.03e-06
ZNF471	660.16	-4.43659	0.870448	-5.0969	3.45e-07	6.03e-06
FAM131B	4998.97	0.435748	0.0855396	5.09411	3.5e-07	6.11e-06
C10orf25	258.054	0.546063	0.107217	5.09306	3.52e-07	6.14e-06
MAPK15	42.1922	-1.88287	0.36992	-5.08995	3.58e-07	6.24e-06
SPTLC3	36.8263	-2.20065	0.432434	-5.08898	3.6e-07	6.26e-06
FOXF1	16.0269	-2.70756	0.53228	-5.08672	3.64e-07	6.33e-06
NKX2.1	3972.48	-2.99274	0.588398	-5.08625	3.65e-07	6.34e-06
SEMA3A	1978.31	0.887907	0.174664	5.08351	3.71e-07	6.42e-06
AMIGO2	1316.84	-0.956014	0.188124	-5.08182	3.74e-07	6.47e-06
SCD	49835.2	-1.23095	0.242325	-5.07975	3.78e-07	6.54e-06
DHFR	1401.12	0.901406	0.177516	5.07788	3.82e-07	6.6e-06
TMOD1	345.458	-1.85442	0.365231	-5.07738	3.83e-07	6.61e-06
SLIT3	656.646	-1.39418	0.274614	-5.07688	3.84e-07	6.62e-06
PIM2	362.276	-0.800807	0.157812	-5.07443	3.89e-07	6.7e-06
TBX3	16.8985	-2.44705	0.482429	-5.07234	3.93e-07	6.76e-06
ILKAP	635.334	0.437703	0.0863124	5.07115	3.95e-07	6.8e-06
HEATR5A	2094.29	-0.907145	0.178936	-5.06967	3.98e-07	6.84e-06
FST	54.2101	-1.0852	0.214053	-5.06977	3.98e-07	6.84e-06
SLITRK4	2919.43	-5.42347	1.06988	-5.06925	3.99e-07	6.84e-06
LINC00880	88.0347	-2.73084	0.538739	-5.06896	4e-07	6.85e-06
LIMS1	1288.21	-0.632253	0.124773	-5.06723	4.04e-07	6.9e-06
CACNG4	7140.47	0.565543	0.111631	5.06618	4.06e-07	6.93e-06
GRN	1016.17	-0.607409	0.119935	-5.06447	4.1e-07	6.99e-06
PLBD2	754.894	-0.67505	0.133319	-5.06342	4.12e-07	7.02e-06
EFNB2	3723.33	1.32873	0.262426	5.06326	4.12e-07	7.02e-06
CPT2	735.339	-0.545488	0.107757	-5.06222	4.14e-07	7.05e-06
CD9	1434.85	-0.963112	0.190304	-5.0609	4.17e-07	7.09e-06
CXorf57	6123.51	-1.17115	0.231469	-5.05966	4.2e-07	7.13e-06
PCDHGA11	154.121	-2.10544	0.416159	-5.05922	4.21e-07	7.14e-06
VWA3A	52.4759	-1.78625	0.353218	-5.05708	4.26e-07	7.21e-06
ROBO2	12750.5	0.920391	0.182122	5.05371	4.33e-07	7.33e-06
GDPD5	1051.34	0.588124	0.116409	5.05221	4.37e-07	7.38e-06
SERPINB6	1204.84	-0.811398	0.160658	-5.05048	4.41e-07	7.44e-06
ZBTB7B	310.212	-0.991933	0.196423	-5.04999	4.42e-07	7.46e-06
HERC3	1807.39	0.422009	0.0835798	5.04918	4.44e-07	7.48e-06
MTUS2	485.147	0.706821	0.140098	5.04519	4.53e-07	7.63e-06
ZNF667	986.575	-4.03529	0.800267	-5.04243	4.6e-07	7.73e-06
SYNGR2	132.354	-0.800587	0.158802	-5.04141	4.62e-07	7.77e-06
FAM183A	25.7395	-2.58678	0.513181	-5.04068	4.64e-07	7.79e-06
NTSR1	255.03	1.05296	0.208965	5.03894	4.68e-07	7.85e-06
HMX3	148.574	-4.0958	0.813078	-5.0374	4.72e-07	7.89e-06
SCUBE3	288.542	0.69218	0.137403	5.03758	4.71e-07	7.89e-06
TRAF3IP2	247.56	-0.869748	0.172651	-5.03761	4.71e-07	7.89e-06
DNAJC15	476	0.738261	0.146595	5.03605	4.75e-07	7.94e-06
UBTD1	217.882	-1.06475	0.211527	-5.03363	4.81e-07	8.03e-06
IPMK	2154.97	0.363757	0.0722785	5.03272	4.84e-07	8.05e-06
PLEKHA4	176.56	-1.76799	0.351288	-5.03287	4.83e-07	8.05e-06
CAMSAP1	9981.14	0.390573	0.0776173	5.03203	4.85e-07	8.07e-06
RBFA	436.982	0.649219	0.12905	5.03076	4.89e-07	8.12e-06
NFE2L1	14379.2	-0.597527	0.118843	-5.02786	4.96e-07	8.22e-06
FAM198B	1934.74	-1.2085	0.240355	-5.02797	4.96e-07	8.22e-06
C6orf106	2297.21	-0.247667	0.0492585	-5.0279	4.96e-07	8.22e-06
RRM2B	4039.43	-0.792825	0.157698	-5.02749	4.97e-07	8.22e-06
HSD17B12	4963.26	-0.550596	0.109534	-5.02671	4.99e-07	8.24e-06
DTNA	5190.52	-0.647421	0.128798	-5.02664	4.99e-07	8.24e-06
COL3A1	1494.2	-7.41097	1.47473	-5.02531	5.03e-07	8.29e-06
TRIM46	688.079	0.596322	0.118721	5.02287	5.09e-07	8.38e-06
ANXA7	1735.34	-0.557546	0.110998	-5.02301	5.09e-07	8.38e-06
AMFR	5786.05	-0.337836	0.0672793	-5.0214	5.13e-07	8.43e-06
TPPP	3658.56	-0.442681	0.0881592	-5.02138	5.13e-07	8.43e-06
TVP23A	356.402	0.569718	0.113478	5.02051	5.15e-07	8.46e-06
PROX1	736.876	-1.5323	0.305263	-5.01961	5.18e-07	8.49e-06
FBXO21	8213.14	-0.245264	0.0488836	-5.01732	5.24e-07	8.58e-06
UBC	30790.6	-0.398283	0.0794091	-5.01558	5.29e-07	8.65e-06
HES5	394.934	-1.03012	0.205588	-5.01061	5.43e-07	8.87e-06
CHCHD2	1846.24	-3.81235	0.761033	-5.00944	5.46e-07	8.92e-06
DNAJC3	2900.63	-0.663354	0.132442	-5.00862	5.48e-07	8.95e-06
GATS	1697.05	0.528322	0.105488	5.00837	5.49e-07	8.95e-06
C19orf12	1685.46	0.379133	0.0757103	5.00769	5.51e-07	8.97e-06
RUFY1	903.938	-0.411941	0.0822913	-5.00589	5.56e-07	9.05e-06
AXL	677.001	-1.06069	0.211918	-5.0052	5.58e-07	9.07e-06
LYRM1	1109.6	0.307196	0.0613976	5.00339	5.63e-07	9.15e-06
KLF7	5754.68	0.49489	0.0990219	4.99778	5.8e-07	9.4e-06
LRRC58	4451.79	-0.555978	0.111242	-4.99789	5.8e-07	9.4e-06
MALT1	681.254	0.52661	0.105391	4.99674	5.83e-07	9.44e-06
SPEF1	90.6702	-1.3907	0.278345	-4.99633	5.84e-07	9.45e-06
INPPL1	1466.24	-0.626786	0.125498	-4.99437	5.9e-07	9.54e-06
TBC1D5	3980.13	-0.369766	0.0740773	-4.99162	5.99e-07	9.66e-06
IGFBP2	13235.9	-0.731112	0.146548	-4.9889	6.07e-07	9.79e-06
SMIM18	390.86	0.683619	0.137077	4.98711	6.13e-07	9.87e-06
TDP1	851.592	0.499756	0.100283	4.98344	6.25e-07	1.01e-05
FOXA2	61.1596	-4.97349	0.998278	-4.98206	6.29e-07	1.01e-05
FLVCR1	793.612	0.513179	0.103097	4.97766	6.44e-07	1.03e-05
C15orf62	20.123	2.03332	0.408551	4.97691	6.46e-07	1.04e-05
PSMA3.AS1	772.899	0.714191	0.143514	4.97647	6.48e-07	1.04e-05
CUBN	173.288	-1.63874	0.329348	-4.9757	6.5e-07	1.04e-05
OXTR	36.6105	-1.201	0.241407	-4.975	6.52e-07	1.04e-05
SEPP1	178.339	-0.793821	0.159575	-4.9746	6.54e-07	1.05e-05
SMO	846.26	-0.729521	0.146722	-4.97213	6.62e-07	1.06e-05
GATAD1	1035.22	-0.512714	0.103145	-4.97084	6.67e-07	1.06e-05
STRIP1	2563.22	0.480929	0.0967928	4.96865	6.74e-07	1.07e-05
ZC3HAV1	629.456	-0.960778	0.193367	-4.96867	6.74e-07	1.07e-05
PSMD5	1053.06	-0.834673	0.168011	-4.96797	6.77e-07	1.08e-05
NUTM2B.AS1	218.337	3.43662	0.692054	4.96583	6.84e-07	1.09e-05
PRKAA2	1703.42	0.502708	0.101245	4.96527	6.86e-07	1.09e-05
NXPH4	937.431	-1.16409	0.234648	-4.96098	7.01e-07	1.11e-05
CYBRD1	1443.34	-1.39475	0.28123	-4.95945	7.07e-07	1.12e-05
BEND3P3	465.904	3.87038	0.780509	4.95878	7.09e-07	1.12e-05
MID1IP1	1800.17	-0.566983	0.114398	-4.95623	7.19e-07	1.14e-05
IGSF9	326.182	0.803305	0.162119	4.95503	7.23e-07	1.14e-05
UCHL3	246.109	0.49776	0.100463	4.95466	7.25e-07	1.14e-05
C1QTNF7	10.5429	-3.33569	0.673524	-4.95259	7.32e-07	1.15e-05
UBXN11	382.225	-0.789738	0.15947	-4.95227	7.34e-07	1.16e-05
ZNF385D	361.327	0.884248	0.178609	4.95076	7.39e-07	1.16e-05
MLLT4.AS1	126.796	1.06825	0.215771	4.95086	7.39e-07	1.16e-05
TM9SF1	1020.99	-0.494108	0.0998357	-4.94921	7.45e-07	1.17e-05
CMBL	1729.98	-0.618945	0.125097	-4.9477	7.51e-07	1.18e-05
NR1D1	412.671	-0.899737	0.18187	-4.94714	7.53e-07	1.18e-05
GNG4	12748.1	0.638112	0.129014	4.94608	7.57e-07	1.18e-05
TMEM179B	286.684	-0.571893	0.115622	-4.94622	7.57e-07	1.18e-05
POTEF	38.2958	-3.3785	0.683496	-4.94297	7.69e-07	1.2e-05
PCMTD2	3023.15	0.47891	0.0968934	4.94264	7.71e-07	1.2e-05
LINC01114	72.0456	1.28896	0.260825	4.94187	7.74e-07	1.21e-05
RYR3	228.047	0.837501	0.169528	4.94018	7.81e-07	1.22e-05
CRYAB	1672.71	-4.21883	0.85454	-4.93696	7.94e-07	1.24e-05
LEFTY2	12.3982	-3.68265	0.746052	-4.93618	7.97e-07	1.24e-05
TCTN3	1168.73	-0.455027	0.0921863	-4.93595	7.98e-07	1.24e-05
F13A1	54.4486	-6.51084	1.31939	-4.93475	8.03e-07	1.25e-05
TBP	759.531	0.354851	0.0719237	4.93371	8.07e-07	1.25e-05
RBM11	186.112	0.673125	0.136461	4.93274	8.11e-07	1.26e-05
TSPO	337.736	-0.584442	0.118506	-4.93176	8.15e-07	1.26e-05
TH	67.7275	1.37156	0.278136	4.93125	8.17e-07	1.26e-05
GRK4	224.721	0.726796	0.147439	4.92946	8.25e-07	1.27e-05
PRDM5	207.997	-0.598924	0.121543	-4.92768	8.32e-07	1.28e-05
KCTD21	425.472	-0.517322	0.105021	-4.92587	8.4e-07	1.3e-05
CYTL1	24.4302	-3.4652	0.704859	-4.91617	8.83e-07	1.36e-05
CELF2	11134.1	0.550338	0.11197	4.91506	8.88e-07	1.37e-05
STAG2	7664.65	-0.447478	0.0910644	-4.91386	8.93e-07	1.37e-05
STRIP2	280.835	0.91237	0.185746	4.91192	9.02e-07	1.39e-05
SCUBE2	333.029	-1.30574	0.26586	-4.91138	9.04e-07	1.39e-05
GNS	5547.81	-0.537006	0.109488	-4.90471	9.36e-07	1.44e-05
RHOH	28.3942	-3.85495	0.786132	-4.9037	9.4e-07	1.44e-05
S100A10	1032.84	-1.92561	0.392775	-4.90258	9.46e-07	1.45e-05
CSPG4	192.106	-1.29503	0.264179	-4.90207	9.48e-07	1.45e-05
ARL3	5236.75	0.179206	0.0365596	4.90177	9.5e-07	1.45e-05
MED29	3438.28	-0.334353	0.0682377	-4.89983	9.59e-07	1.46e-05
CLU	22239.8	-1.11086	0.226849	-4.8969	9.74e-07	1.49e-05
COLEC12	310.182	-3.36571	0.687665	-4.8944	9.86e-07	1.5e-05
RAB38	74.4667	-1.02382	0.209212	-4.8937	9.9e-07	1.51e-05
ZNF738	1799.74	0.40724	0.0832479	4.8919	9.99e-07	1.52e-05
ANKDD1A	367.323	0.690432	0.141168	4.89084	1e-06	1.53e-05
ELOVL5	4878.53	-0.497451	0.101713	-4.89073	1e-06	1.53e-05
EPHA7	1562.96	1.29265	0.264332	4.89027	1.01e-06	1.53e-05
EPHX1	1751.47	-1.06456	0.217712	-4.88978	1.01e-06	1.53e-05
MYLK	271.58	-1.93117	0.395208	-4.88647	1.03e-06	1.55e-05
ANKH	1420.99	0.546914	0.111927	4.88635	1.03e-06	1.55e-05
IL6R	60.4024	-1.87913	0.384737	-4.8842	1.04e-06	1.57e-05
PNPLA2	415.664	-0.633458	0.129696	-4.88419	1.04e-06	1.57e-05
JUP	1359.76	0.541525	0.110934	4.8815	1.05e-06	1.59e-05
ARAP1	1190.94	-0.557325	0.114209	-4.87987	1.06e-06	1.6e-05
LGALS3	195.599	-1.91381	0.392188	-4.87983	1.06e-06	1.6e-05
GRID2	958.853	0.596575	0.122258	4.87965	1.06e-06	1.6e-05
MIR4435.2HG	58.1579	-1.66808	0.341858	-4.87945	1.06e-06	1.6e-05
APC2	9331.19	0.560477	0.115011	4.87326	1.1e-06	1.65e-05
CCDC170	207.66	-1.57791	0.324103	-4.86853	1.12e-06	1.69e-05
TULP4	3579.99	0.413785	0.0850026	4.86791	1.13e-06	1.69e-05
FBN3	427.892	1.06398	0.218634	4.86647	1.14e-06	1.7e-05
FAM221A	426.605	0.393112	0.0807937	4.86562	1.14e-06	1.71e-05
SSFA2	2872.1	-0.763747	0.15698	-4.86525	1.14e-06	1.71e-05
CFAP54	138.465	-1.50472	0.309339	-4.86431	1.15e-06	1.72e-05
HSDL2	3101.01	-0.614449	0.126399	-4.8612	1.17e-06	1.74e-05
NEFM	7119.48	0.614113	0.126366	4.85979	1.18e-06	1.75e-05
TANC2	6195.36	0.447271	0.0920502	4.859	1.18e-06	1.76e-05
SASH1	2374.28	-1.30667	0.268946	-4.85847	1.18e-06	1.76e-05
NUDT12	2038.54	-0.769689	0.158433	-4.85814	1.18e-06	1.76e-05
HAS2	259.323	-2.88704	0.594389	-4.85716	1.19e-06	1.77e-05
CDO1	3946.89	-0.511759	0.105408	-4.85504	1.2e-06	1.79e-05
CPLX2	6821.08	0.933181	0.192223	4.85468	1.21e-06	1.79e-05
LOC401286	14.9368	3.1213	0.643137	4.85324	1.21e-06	1.8e-05
BSG	11733.8	-0.433822	0.0894176	-4.85164	1.22e-06	1.81e-05
U2SURP	5254.3	0.406611	0.0838062	4.8518	1.22e-06	1.81e-05
FAXDC2	536.445	-0.760209	0.156709	-4.85109	1.23e-06	1.81e-05
SRGAP2	4828.13	0.64854	0.133758	4.84859	1.24e-06	1.84e-05
SLC25A39	927.26	-0.603062	0.124392	-4.84806	1.25e-06	1.84e-05
BTD	232.201	-0.72422	0.149447	-4.84598	1.26e-06	1.86e-05
ALDH9A1	4960.1	-0.837619	0.17286	-4.84564	1.26e-06	1.86e-05
MAP3K1	1079.93	0.973222	0.200849	4.84554	1.26e-06	1.86e-05
PLSCR1	97.0289	-1.02025	0.210612	-4.84421	1.27e-06	1.87e-05
CLEC19A	8.96094	-2.92948	0.605438	-4.83861	1.31e-06	1.92e-05
LRAT	375.965	-1.27844	0.26421	-4.83872	1.31e-06	1.92e-05
SNX31	20.8109	-1.94771	0.402579	-4.83809	1.31e-06	1.92e-05
PHF14	7325.76	0.369228	0.0763513	4.83591	1.33e-06	1.94e-05
QPCT	318.895	1.14422	0.236698	4.83408	1.34e-06	1.96e-05
SLTM	3590.61	0.402969	0.0833791	4.83297	1.35e-06	1.97e-05
SYT10	165.044	3.19692	0.661847	4.83031	1.36e-06	1.99e-05
CTSH	224.15	-1.16758	0.24175	-4.82972	1.37e-06	1.99e-05
GLI2	162.43	1.91503	0.396641	4.82814	1.38e-06	2.01e-05
CTBS	489.801	-1.17054	0.242459	-4.82778	1.38e-06	2.01e-05
ANKRD9	382.896	-0.617022	0.12791	-4.82389	1.41e-06	2.05e-05
BHLHE41	958.124	-2.32591	0.482191	-4.82362	1.41e-06	2.05e-05
NT5C2	2857.39	0.303939	0.0630229	4.82268	1.42e-06	2.06e-05
RNF44	2114.52	0.443698	0.0920315	4.82115	1.43e-06	2.07e-05
STK26	463.233	-0.763789	0.158447	-4.82046	1.43e-06	2.08e-05
P3H1	580.065	-0.61773	0.128183	-4.81912	1.44e-06	2.09e-05
PTBP2	5280.63	0.32938	0.0683506	4.81898	1.44e-06	2.09e-05
GATM	2278.59	-0.570431	0.118376	-4.81882	1.44e-06	2.09e-05
STK17A	590.404	1.01449	0.210512	4.81917	1.44e-06	2.09e-05
CRCP	1882.99	0.263516	0.0546927	4.81812	1.45e-06	2.09e-05
LOC100287846	428.408	-0.530304	0.110142	-4.81473	1.47e-06	2.13e-05
ZIC3	1650.26	0.986929	0.205021	4.81379	1.48e-06	2.13e-05
KCNMB4	1141.49	-0.442234	0.0918805	-4.81314	1.49e-06	2.14e-05
GPRIN1	6495.43	0.381952	0.0793739	4.81206	1.49e-06	2.15e-05
LDLR	1013.84	-0.769489	0.159931	-4.81138	1.5e-06	2.15e-05
LMF2	688.269	-0.529743	0.11012	-4.81061	1.5e-06	2.16e-05
TMEM254.AS1	210.362	0.740235	0.153916	4.80935	1.51e-06	2.17e-05
CPZ	14.8986	-2.51335	0.522653	-4.80882	1.52e-06	2.18e-05
SNCAIP	1868.77	0.49081	0.102078	4.8082	1.52e-06	2.18e-05
TMED1	498.249	-0.634796	0.132046	-4.80739	1.53e-06	2.19e-05
ZMYM6NB	50.8527	-1.0711	0.222852	-4.80632	1.54e-06	2.2e-05
CSRNP1	345.469	-0.884694	0.184083	-4.80595	1.54e-06	2.2e-05
PPARA	560.385	-0.734968	0.152965	-4.80483	1.55e-06	2.21e-05
ZNF680	1078.05	-0.582111	0.121159	-4.80454	1.55e-06	2.21e-05
KLF2	57.2656	-1.39358	0.290165	-4.80269	1.57e-06	2.23e-05
COPB2	6515.11	-0.327157	0.0681505	-4.80051	1.58e-06	2.25e-05
RAB7A	10477.3	-0.352562	0.0734515	-4.79993	1.59e-06	2.26e-05
THOC1	543.36	0.705738	0.147042	4.79957	1.59e-06	2.26e-05
MORN5	59.7179	-1.28802	0.268429	-4.79836	1.6e-06	2.27e-05
RNF180	1327.73	0.435448	0.0907896	4.79624	1.62e-06	2.29e-05
MAGED1	26429.4	-0.490284	0.102232	-4.79577	1.62e-06	2.3e-05
MAGEL2	2904.61	-0.921999	0.192274	-4.79524	1.62e-06	2.3e-05
RGS16	421.56	-0.812847	0.169592	-4.79296	1.64e-06	2.32e-05
CD248	26.2296	-2.37517	0.495551	-4.79299	1.64e-06	2.32e-05
RPGR	342.33	-0.825902	0.172314	-4.793	1.64e-06	2.32e-05
RFWD2	1973.83	0.382086	0.0797314	4.79216	1.65e-06	2.33e-05
TEKT1	95.9557	-2.09043	0.436274	-4.79155	1.65e-06	2.33e-05
ABI3BP	118.423	-1.82083	0.380034	-4.79123	1.66e-06	2.33e-05
MVB12B	4701.22	0.389767	0.0814061	4.78793	1.69e-06	2.37e-05
SRP68	3319.45	-0.258359	0.0539752	-4.78663	1.7e-06	2.38e-05
NUTM2B	63.793	2.36887	0.494944	4.78614	1.7e-06	2.39e-05
PCDHGC5	121.024	-1.09399	0.228601	-4.78561	1.7e-06	2.39e-05
IL33	1591.23	-1.28458	0.268502	-4.78424	1.72e-06	2.41e-05
TTN	399.543	0.701065	0.146546	4.78392	1.72e-06	2.41e-05
FMOD	20.1341	-3.7966	0.793765	-4.78303	1.73e-06	2.42e-05
RIMKLB	3320.54	0.48978	0.102425	4.78186	1.74e-06	2.43e-05
PIAS3	858.851	-0.390148	0.0815966	-4.78142	1.74e-06	2.43e-05
TMBIM6	25711.3	-0.364602	0.0762835	-4.77957	1.76e-06	2.45e-05
PRTG	562.882	-1.33793	0.279943	-4.7793	1.76e-06	2.45e-05
PTGDS	2177.88	-3.26131	0.682749	-4.77673	1.78e-06	2.48e-05
HIRA	2464.4	0.291369	0.0610056	4.7761	1.79e-06	2.49e-05
C1orf141	8.60192	-4.2943	0.899225	-4.77555	1.79e-06	2.49e-05
TRIM58	299.507	-0.813859	0.170536	-4.77236	1.82e-06	2.53e-05
SERPINI1	3580.36	-1.3264	0.277934	-4.77233	1.82e-06	2.53e-05
WDR49	85.8039	-2.74287	0.574877	-4.77122	1.83e-06	2.54e-05
DRD1	125.712	1.37953	0.289163	4.77075	1.84e-06	2.55e-05
F5	346.96	-3.19029	0.669324	-4.76643	1.88e-06	2.6e-05
SLC22A23	3068.11	0.311996	0.0654706	4.76543	1.88e-06	2.61e-05
IL13RA1	334.011	-0.840307	0.176358	-4.76477	1.89e-06	2.62e-05
ADORA1	459.431	0.520605	0.109272	4.76432	1.89e-06	2.62e-05
ABCA8	197.345	-2.33576	0.490245	-4.76448	1.89e-06	2.62e-05
GPR158	770.533	-0.875673	0.183828	-4.76354	1.9e-06	2.63e-05
FBXL19	3945.73	0.478447	0.100458	4.76264	1.91e-06	2.63e-05
SLC35A2	639.547	-0.585845	0.123119	-4.75836	1.95e-06	2.69e-05
SUSD2	20.0392	-1.80726	0.379947	-4.75661	1.97e-06	2.71e-05
VWA3B	87.519	-2.42116	0.509049	-4.75624	1.97e-06	2.71e-05
CTIF	6485.42	0.310408	0.0652719	4.75561	1.98e-06	2.72e-05
PROCR	81.0147	-2.71408	0.570919	-4.75387	2e-06	2.74e-05
CD55	437.388	-1.14079	0.240082	-4.75168	2.02e-06	2.77e-05
SLITRK2	2276.84	-3.56144	0.750083	-4.74806	2.05e-06	2.82e-05
TRHDE.AS1	99.0583	1.70468	0.359195	4.74584	2.08e-06	2.84e-05
CACNA1H	2450.19	0.432878	0.0912173	4.74557	2.08e-06	2.85e-05
PKM	33948.9	-0.346577	0.0730724	-4.74293	2.11e-06	2.88e-05
PDP2	1280.79	-0.326562	0.0688527	-4.7429	2.11e-06	2.88e-05
CLEC4GP1	32.5059	-1.53681	0.324021	-4.74294	2.11e-06	2.88e-05
LOC642361	164.122	2.75735	0.581667	4.74042	2.13e-06	2.91e-05
ACADS	288.412	-0.723411	0.152629	-4.73966	2.14e-06	2.92e-05
TRPS1	1097.37	-0.571546	0.120595	-4.73939	2.14e-06	2.92e-05
ZFHX4	3114.01	0.998401	0.210703	4.73843	2.15e-06	2.93e-05
DLX1	5440.63	0.921104	0.19449	4.73599	2.18e-06	2.96e-05
PON2	3064.68	-0.871978	0.184139	-4.73542	2.19e-06	2.97e-05
DHCR7	2069.03	-0.820749	0.173345	-4.73478	2.19e-06	2.97e-05
TAOK3	2405.32	0.240631	0.0508196	4.735	2.19e-06	2.97e-05
IL17RA	149.666	-1.11322	0.235119	-4.73471	2.19e-06	2.97e-05
STK38L	1414.89	-0.438649	0.0926542	-4.73425	2.2e-06	2.98e-05
DLX6	1556.52	0.906171	0.191472	4.73266	2.22e-06	3e-05
GNAQ	12348	0.369234	0.0780219	4.73243	2.22e-06	3e-05
ADAM9	3901.66	-0.549677	0.116185	-4.73106	2.23e-06	3.02e-05
MTERF1	523.812	0.400432	0.0846494	4.73048	2.24e-06	3.02e-05
ALDH3A2	3543.79	-0.446141	0.0943585	-4.72815	2.27e-06	3.05e-05
LINC01122	244.919	0.747807	0.158164	4.72804	2.27e-06	3.05e-05
GPT2	5022.95	-0.461502	0.0976155	-4.72776	2.27e-06	3.06e-05
SIK1	320.808	0.532911	0.112749	4.72651	2.28e-06	3.07e-05
CAPSL	76.0227	-2.36942	0.5013	-4.72656	2.28e-06	3.07e-05
CAMK4	833.082	0.59942	0.126842	4.72571	2.29e-06	3.08e-05
ZNF285	473.343	-3.94369	0.835061	-4.72264	2.33e-06	3.12e-05
ANTXR1	3208.85	-0.866633	0.183512	-4.72249	2.33e-06	3.12e-05
TYW3	169.656	-3.00168	0.635682	-4.72199	2.34e-06	3.13e-05
GNG7	1626.06	0.378692	0.0802062	4.72148	2.34e-06	3.13e-05
AMOT	2914.15	-0.512944	0.108759	-4.71634	2.4e-06	3.21e-05
C22orf24	32.7139	1.57135	0.333341	4.71394	2.43e-06	3.25e-05
ZWILCH	951.274	0.656735	0.139341	4.71316	2.44e-06	3.26e-05
APAF1	1676.28	0.532559	0.113003	4.71276	2.44e-06	3.26e-05
SAYSD1	1003.42	0.503961	0.106944	4.71239	2.45e-06	3.26e-05
DTHD1	78.7509	-4.1234	0.87544	-4.71009	2.48e-06	3.3e-05
LONRF1	2280.15	0.471524	0.100121	4.70955	2.48e-06	3.3e-05
TRIB3	1079.13	-0.817768	0.173655	-4.70916	2.49e-06	3.31e-05
FLI1	13.3693	-3.12968	0.664642	-4.70883	2.49e-06	3.31e-05
SPATS2L	3834.44	-0.702173	0.14913	-4.70847	2.5e-06	3.31e-05
TRIP6	432.668	-0.803772	0.17079	-4.7062	2.52e-06	3.35e-05
SRSF5	4338.47	0.438567	0.0932085	4.70522	2.54e-06	3.36e-05
CD151	1195.4	-0.551434	0.117254	-4.70289	2.57e-06	3.4e-05
GTF2H1	1099.91	0.380675	0.0809703	4.70142	2.58e-06	3.42e-05
ARHGEF26.AS1	301.062	-1.12787	0.239928	-4.70088	2.59e-06	3.42e-05
SDPR	12.2587	-3.84191	0.817479	-4.6997	2.61e-06	3.44e-05
CRYZ	559.757	-3.37029	0.717292	-4.69863	2.62e-06	3.46e-05
RELL1	388.986	-0.684516	0.145713	-4.69771	2.63e-06	3.47e-05
SRI	4582.74	-0.549989	0.117079	-4.69761	2.63e-06	3.47e-05
MRC2	2798.74	-0.701816	0.14941	-4.69725	2.64e-06	3.47e-05
CACNB4	1769.26	0.541105	0.115316	4.69236	2.7e-06	3.55e-05
ANKRD6	2028.5	-0.743123	0.158382	-4.69196	2.71e-06	3.56e-05
ZNF311	241.009	0.564075	0.120236	4.69139	2.71e-06	3.56e-05
ULK3	634.845	0.62052	0.132315	4.68973	2.74e-06	3.59e-05
SAMD10	577.847	0.618241	0.131859	4.68866	2.75e-06	3.61e-05
PRPH2	59.9881	-1.94001	0.413782	-4.68848	2.75e-06	3.61e-05
RNF216	2586.9	-0.23189	0.0494629	-4.68815	2.76e-06	3.61e-05
YPEL3	845.545	0.448168	0.0956134	4.68729	2.77e-06	3.62e-05
LRP2	2743.77	-2.51881	0.537394	-4.6871	2.77e-06	3.62e-05
TIGD1	911.658	0.317537	0.0677605	4.68617	2.78e-06	3.64e-05
TMEM9	4660.13	-0.38743	0.0827023	-4.68464	2.8e-06	3.66e-05
SLC29A1	817.333	-0.607767	0.129773	-4.68332	2.82e-06	3.68e-05
GPR153	1293.95	0.740975	0.158295	4.68096	2.86e-06	3.72e-05
NFIX	2796.87	-0.93115	0.198936	-4.68065	2.86e-06	3.72e-05
HLA.DQB1	199.656	-1.62425	0.347176	-4.67846	2.89e-06	3.76e-05
MYC	580.921	0.615818	0.131673	4.67689	2.91e-06	3.79e-05
DDIT3	1640.78	-0.902175	0.192977	-4.67503	2.94e-06	3.82e-05
CTSB	8595.24	-0.464891	0.0994493	-4.67465	2.94e-06	3.82e-05
PI4KAP1	178.159	0.794099	0.16995	4.67254	2.97e-06	3.86e-05
IRS2	3069.91	-0.537602	0.115063	-4.67226	2.98e-06	3.86e-05
SAMD9L	75.5848	-1.65009	0.353268	-4.67094	3e-06	3.88e-05
STT3A	3586.84	-0.507061	0.108619	-4.66828	3.04e-06	3.93e-05
ZCCHC18	995.481	-0.649337	0.139151	-4.66641	3.07e-06	3.96e-05
NUDT16	3004.8	-0.689707	0.147819	-4.66588	3.07e-06	3.97e-05
TKT	5100.59	-0.464743	0.0996132	-4.66547	3.08e-06	3.97e-05
CCDC92	1334.17	0.351175	0.0752834	4.66471	3.09e-06	3.99e-05
TIMP3	5414.95	-1.60956	0.345061	-4.66458	3.09e-06	3.99e-05
HEXIM1	1724.69	-0.390543	0.0837935	-4.66078	3.15e-06	4.06e-05
TMEM144	199.133	-1.80361	0.387027	-4.66016	3.16e-06	4.07e-05
JPH1	245.662	1.18682	0.254718	4.65933	3.17e-06	4.08e-05
SGPP1	1106.98	-0.387806	0.0832533	-4.65815	3.19e-06	4.1e-05
GDE1	2067.65	0.32639	0.0700935	4.6565	3.22e-06	4.13e-05
PRR13	1008.38	-0.501208	0.107661	-4.65542	3.23e-06	4.15e-05
FAM13A	1187.36	-0.886492	0.19055	-4.65228	3.28e-06	4.21e-05
ATRAID	1240.25	-0.539713	0.116019	-4.65195	3.29e-06	4.21e-05
ADAMTS16	33.5645	-1.84447	0.396483	-4.65207	3.29e-06	4.21e-05
LSS	2399.22	-0.335708	0.0721913	-4.65025	3.32e-06	4.24e-05
SHC1	650.291	-0.668355	0.143736	-4.64986	3.32e-06	4.24e-05
ZDBF2	4270.17	-0.550681	0.118428	-4.64994	3.32e-06	4.24e-05
PIK3CD	417.362	0.905626	0.194794	4.64914	3.33e-06	4.25e-05
APLP2	23624.3	-0.412208	0.0887123	-4.64657	3.37e-06	4.3e-05
IMPAD1	8388.72	-0.391493	0.0842629	-4.64609	3.38e-06	4.31e-05
RAB5B	6365.65	-0.263403	0.056697	-4.64579	3.39e-06	4.31e-05
ETV1	6148.45	0.928353	0.199856	4.64511	3.4e-06	4.32e-05
FBLN2	184.093	-0.899386	0.194021	-4.63552	3.56e-06	4.52e-05
ERRFI1	1215.91	0.403642	0.087167	4.63067	3.64e-06	4.63e-05
RAB21	3283.78	-0.435247	0.0939944	-4.63056	3.65e-06	4.63e-05
BHLHB9	2491.41	0.321156	0.0693583	4.63039	3.65e-06	4.63e-05
HENMT1	218.209	0.857469	0.18523	4.62921	3.67e-06	4.65e-05
TOR1AIP1	1822.83	-0.604138	0.130547	-4.62775	3.7e-06	4.68e-05
MDFIC	654.243	-0.832969	0.180063	-4.62599	3.73e-06	4.72e-05
CCDC8	557.511	-0.700173	0.151466	-4.62264	3.79e-06	4.79e-05
LRTOMT	505.794	-0.444695	0.0962359	-4.62088	3.82e-06	4.83e-05
ZNF630	162.971	-1.17602	0.254793	-4.61559	3.92e-06	4.95e-05
ZNF554	954.888	0.324834	0.0703828	4.61524	3.93e-06	4.95e-05
UBE2E3	4030.6	0.274189	0.0594269	4.61389	3.95e-06	4.98e-05
CD68	164.176	-1.26688	0.274614	-4.6133	3.96e-06	4.99e-05
PLD1	89.0281	-1.62614	0.352618	-4.61163	4e-06	5.03e-05
NCAN	18678.6	0.645086	0.139913	4.61061	4.01e-06	5.05e-05
PLCH1	732.706	0.631224	0.136991	4.60778	4.07e-06	5.11e-05
TBC1D4	527.142	-0.832874	0.180777	-4.60719	4.08e-06	5.12e-05
COL14A1	644.078	-3.27894	0.711814	-4.60645	4.1e-06	5.14e-05
PYROXD1	477.014	0.458748	0.0996018	4.60583	4.11e-06	5.15e-05
SYS1	870.29	-0.449012	0.0974991	-4.60529	4.12e-06	5.16e-05
RP9P	475.874	0.432526	0.0939959	4.60154	4.19e-06	5.25e-05
ARHGDIA	4681.42	-0.342759	0.0744985	-4.60088	4.21e-06	5.26e-05
WDFY1	3267.65	-0.345644	0.0751727	-4.598	4.27e-06	5.33e-05
GAL3ST4	221.239	1.2707	0.276361	4.59796	4.27e-06	5.33e-05
ZFP36	49.224	-1.76018	0.382838	-4.5977	4.27e-06	5.33e-05
ARRDC2	100.214	-1.26974	0.276221	-4.5968	4.29e-06	5.35e-05
EEA1	3619.83	-0.61581	0.13398	-4.59627	4.3e-06	5.35e-05
ARFGEF1	2943.98	0.417014	0.0907257	4.59642	4.3e-06	5.35e-05
GYG1	1117.9	-0.763913	0.166214	-4.59597	4.31e-06	5.36e-05
STAU2	6169.47	0.32887	0.0715877	4.59395	4.35e-06	5.41e-05
ELAVL3	14525.1	0.436862	0.0951006	4.59368	4.35e-06	5.41e-05
MAFF	376.263	-0.799699	0.174157	-4.59183	4.39e-06	5.45e-05
SULT1C4	469.025	-0.939739	0.204675	-4.59137	4.4e-06	5.46e-05
HS3ST1	144.067	0.959282	0.209075	4.58823	4.47e-06	5.54e-05
NAT8L	3579.09	-0.40899	0.0891426	-4.58805	4.47e-06	5.54e-05
APOO	809.84	0.416821	0.0908713	4.58693	4.5e-06	5.56e-05
RBM6	2868.16	0.527201	0.114961	4.58593	4.52e-06	5.59e-05
TNFAIP8L3	90.5413	-1.84369	0.402081	-4.58537	4.53e-06	5.6e-05
ATP7A	1134.99	-0.484753	0.105724	-4.58509	4.54e-06	5.6e-05
PARD3B	1527.33	-0.912012	0.198997	-4.58306	4.58e-06	5.65e-05
GSX1	21.0835	-3.17062	0.691961	-4.58208	4.6e-06	5.66e-05
LRRC49	1877.5	0.314304	0.0685929	4.58217	4.6e-06	5.66e-05
SNN	9810.74	0.346382	0.0755937	4.58215	4.6e-06	5.66e-05
RBFOX2	26309	0.520617	0.113607	4.58262	4.59e-06	5.66e-05
GABBR2	8930.54	-0.695589	0.151801	-4.58223	4.6e-06	5.66e-05
ATP1B2	7992.06	-0.653714	0.142686	-4.5815	4.62e-06	5.67e-05
INTS7	1128.18	0.4873	0.106385	4.58052	4.64e-06	5.69e-05
RFPL1S	1618.5	0.363686	0.0794032	4.58024	4.64e-06	5.69e-05
RPS6KA6	1142.27	0.436026	0.0952241	4.57894	4.67e-06	5.73e-05
CC2D2A	898.965	-0.516776	0.112886	-4.57785	4.7e-06	5.75e-05
ANAPC4	665.619	0.348901	0.0762288	4.57702	4.72e-06	5.77e-05
C6orf118	126.424	-1.03583	0.226354	-4.57614	4.74e-06	5.79e-05
TLR3	38.6911	-1.56431	0.341919	-4.57509	4.76e-06	5.81e-05
SAT1	3239.42	-1.0176	0.222435	-4.57482	4.77e-06	5.82e-05
LMOD1	51.1817	-1.68697	0.368884	-4.57318	4.8e-06	5.86e-05
SLC5A6	549.458	0.393154	0.0859728	4.57301	4.81e-06	5.86e-05
CIB1	738.672	-0.767451	0.167833	-4.57271	4.81e-06	5.86e-05
ADIPOR1	2592.15	-0.427207	0.093465	-4.57077	4.86e-06	5.91e-05
NUB1	2621.69	-0.317103	0.069384	-4.57026	4.87e-06	5.92e-05
PIRT	80.7004	-2.31935	0.507611	-4.56915	4.9e-06	5.94e-05
DCAKD	2018.55	-0.385758	0.084422	-4.5694	4.89e-06	5.94e-05
EPHB3	1192.42	-1.28351	0.2809	-4.56928	4.89e-06	5.94e-05
PCDHGA3	680.75	-3.99553	0.874747	-4.56764	4.93e-06	5.98e-05
ERO1A	4195.58	-0.649437	0.142241	-4.56576	4.98e-06	6.03e-05
VRK2	40.233	-1.38068	0.302481	-4.56451	5.01e-06	6.06e-05
ATG13	2791.68	-0.234581	0.0513949	-4.56429	5.01e-06	6.06e-05
TRPV2	24.6665	-1.27971	0.28038	-4.56419	5.01e-06	6.06e-05
TOX2	1415.44	-0.833595	0.182648	-4.56395	5.02e-06	6.06e-05
C12orf4	1270.74	0.431425	0.0945373	4.56355	5.03e-06	6.07e-05
NMU	140.898	1.60636	0.352016	4.56332	5.04e-06	6.07e-05
ITGA3	1291.7	-0.805312	0.176486	-4.56304	5.04e-06	6.08e-05
ST6GAL1	973.145	0.724449	0.158901	4.55912	5.14e-06	6.19e-05
PSAP	47009.2	-0.56252	0.123404	-4.55836	5.16e-06	6.2e-05
ACTR10	3391.57	0.309706	0.0679428	4.55833	5.16e-06	6.2e-05
NFKB2	270.315	-0.761899	0.167189	-4.55711	5.19e-06	6.23e-05
SCAMP2	437.429	-0.763294	0.167579	-4.55484	5.24e-06	6.29e-05
RUNX2	43.8864	-1.40665	0.308828	-4.55481	5.24e-06	6.29e-05
CPEB3	1476.23	0.457246	0.100447	4.55211	5.31e-06	6.37e-05
PARP14	460.924	-0.953	0.209363	-4.55191	5.32e-06	6.37e-05
SAMD14	2408.29	0.446541	0.0981361	4.55022	5.36e-06	6.42e-05
FAAH	443.714	0.628584	0.138151	4.54999	5.36e-06	6.42e-05
SEC11A	2392.04	-0.311211	0.0684047	-4.54955	5.38e-06	6.43e-05
MVP	273.245	-0.588883	0.129516	-4.5468	5.45e-06	6.51e-05
PACRG	563.165	-1.07589	0.236781	-4.54383	5.52e-06	6.59e-05
NBPF20	226.755	0.889387	0.195746	4.54359	5.53e-06	6.6e-05
TMEM38B	1268.45	-0.885498	0.195016	-4.54065	5.61e-06	6.69e-05
USP2	297.942	-0.408439	0.0899841	-4.53902	5.65e-06	6.73e-05
GNRH1	284.763	1.31518	0.28987	4.53714	5.7e-06	6.79e-05
RENBP	311.761	-0.963536	0.212386	-4.53671	5.71e-06	6.8e-05
NUPR1	358.814	-2.06408	0.455028	-4.53617	5.73e-06	6.81e-05
PRKG1	479.546	-1.03268	0.227673	-4.53579	5.74e-06	6.82e-05
PTPN11	13397.6	-0.300218	0.0661941	-4.53542	5.75e-06	6.82e-05
NPR3	225.49	1.17885	0.259964	4.53467	5.77e-06	6.84e-05
ADSSL1	375.139	-1.00538	0.221786	-4.53311	5.81e-06	6.89e-05
APOL2	378.783	-0.660074	0.145709	-4.53009	5.9e-06	6.98e-05
BRS3	50.3916	-2.12228	0.468699	-4.52802	5.95e-06	7.05e-05
FXR1	6862.17	-0.320266	0.0707364	-4.5276	5.97e-06	7.05e-05
SLC37A3	1510.19	0.494672	0.109254	4.52771	5.96e-06	7.05e-05
RPN1	7422.9	-0.35169	0.0776917	-4.52675	5.99e-06	7.07e-05
ANAPC5	2345.02	0.342189	0.0756029	4.52613	6.01e-06	7.09e-05
KAT2A	876.392	0.424152	0.0937247	4.52551	6.03e-06	7.1e-05
ANKUB1	28.2288	-3.18028	0.70292	-4.52438	6.06e-06	7.14e-05
DNALI1	1053.8	-0.65222	0.144204	-4.5229	6.1e-06	7.18e-05
ATP10B	57.6243	1.30038	0.287533	4.52254	6.11e-06	7.19e-05
NREP	38003.1	0.455264	0.100685	4.52167	6.14e-06	7.21e-05
ALDOA	27894.8	-0.653926	0.144657	-4.52052	6.17e-06	7.24e-05
FBXO27	371.014	-0.622668	0.137742	-4.52053	6.17e-06	7.24e-05
HEXA	1965.19	-0.556604	0.123176	-4.51879	6.22e-06	7.3e-05
KIDINS220	33278.5	0.40637	0.0899324	4.51862	6.22e-06	7.3e-05
TMEM133	138.557	-0.983082	0.217621	-4.51741	6.26e-06	7.33e-05
TMEM19	1686.29	0.2718	0.060176	4.51675	6.28e-06	7.35e-05
SNX32	180.306	0.705398	0.15622	4.51542	6.32e-06	7.39e-05
SNX27	3124.18	0.29854	0.0661352	4.51409	6.36e-06	7.43e-05
VAC14.AS1	19.2003	-2.18981	0.485104	-4.51411	6.36e-06	7.43e-05
ELL2	309.291	-0.816768	0.180954	-4.51367	6.37e-06	7.44e-05
P3H4	1526.52	-0.56417	0.125018	-4.5127	6.4e-06	7.47e-05
TCF7L1	365.4	-0.823774	0.182557	-4.51241	6.41e-06	7.47e-05
CRLF1	79.8532	-2.27608	0.504547	-4.51113	6.45e-06	7.51e-05
LYNX1	2047.7	-0.794855	0.176216	-4.51068	6.46e-06	7.52e-05
BOLA3.AS1	1344.17	0.418534	0.0928327	4.50848	6.53e-06	7.6e-05
COL4A3BP	3745.42	-0.545829	0.121072	-4.5083	6.54e-06	7.6e-05
ACTA2	112.988	-1.18798	0.263582	-4.50706	6.57e-06	7.63e-05
UBA6.AS1	680.528	0.494942	0.109816	4.50701	6.57e-06	7.63e-05
GTF2IP1	696.545	0.442401	0.0981546	4.50719	6.57e-06	7.63e-05
CABIN1	3997.43	-0.251697	0.0558477	-4.50683	6.58e-06	7.63e-05
PRDX6	2719.68	-0.498373	0.110609	-4.5057	6.62e-06	7.66e-05
DUSP5P1	61.7597	2.00975	0.44628	4.50335	6.69e-06	7.74e-05
FLNC	1816.3	-1.25829	0.279417	-4.50325	6.69e-06	7.74e-05
PIK3C2B	1852.28	0.487091	0.108204	4.5016	6.74e-06	7.8e-05
RASA3	1288.83	0.490472	0.108961	4.50137	6.75e-06	7.8e-05
CEP78	659.033	0.45132	0.100271	4.50102	6.76e-06	7.81e-05
ELF4	68.4646	-1.71044	0.380146	-4.49943	6.81e-06	7.86e-05
ZNF33A	3656.47	0.457791	0.101757	4.49888	6.83e-06	7.87e-05
TMED10	11260.8	-0.485238	0.107871	-4.49832	6.85e-06	7.89e-05
DNAJC16	1053.21	0.272763	0.0606573	4.4968	6.9e-06	7.94e-05
LURAP1L	137.737	-1.43602	0.319349	-4.49672	6.9e-06	7.94e-05
UCK2	1428.32	0.345713	0.0768872	4.49637	6.91e-06	7.94e-05
LOC653602	162.55	0.639177	0.14219	4.49523	6.95e-06	7.98e-05
EAF2	67.2109	-0.931418	0.207209	-4.49506	6.95e-06	7.98e-05
COMT	351.895	-2.42325	0.539179	-4.49433	6.98e-06	8e-05
HEY2	55.1991	-2.25035	0.500705	-4.49435	6.98e-06	8e-05
DFFB	177.041	0.655553	0.145926	4.49238	7.04e-06	8.06e-05
S1PR1	2333.43	-0.870375	0.193752	-4.49222	7.05e-06	8.06e-05
LINC01158	595.372	1.84288	0.410244	4.49214	7.05e-06	8.06e-05
TMEM51.AS1	25.6677	1.26234	0.281305	4.48746	7.21e-06	8.24e-05
DAB2	67.2031	-0.950024	0.211767	-4.48619	7.25e-06	8.28e-05
HMX2	84.5547	-3.62233	0.807634	-4.48511	7.29e-06	8.31e-05
ATP6V1E2	113.611	0.571095	0.127328	4.48523	7.28e-06	8.31e-05
NHLRC1	39.9697	-1.30944	0.291977	-4.48473	7.3e-06	8.32e-05
CFAP58.AS1	34.7691	-1.34321	0.299519	-4.48457	7.31e-06	8.32e-05
SLC20A2	1226.01	-0.592145	0.132085	-4.48306	7.36e-06	8.37e-05
CTNND2	11939.7	0.449952	0.100379	4.48253	7.38e-06	8.39e-05
SCG2	20875	-1.27443	0.284341	-4.48205	7.39e-06	8.4e-05
CAPS2	305.06	-0.905483	0.202111	-4.48012	7.46e-06	8.47e-05
TMEM45A	473.676	-0.838648	0.187197	-4.48002	7.46e-06	8.47e-05
NKX2.1.AS1	159.44	-3.1396	0.701234	-4.47724	7.56e-06	8.58e-05
GPAM	1877.4	0.29027	0.0648382	4.47684	7.58e-06	8.59e-05
ADD2	7545.25	0.449987	0.100521	4.47655	7.59e-06	8.59e-05
NEK5	23.8182	-1.32509	0.296078	-4.47547	7.62e-06	8.63e-05
RPP25	657.418	0.826361	0.18474	4.4731	7.71e-06	8.72e-05
LIMCH1	6958.1	-0.839449	0.187691	-4.4725	7.73e-06	8.74e-05
RAB29	848.013	-0.797324	0.178325	-4.47118	7.78e-06	8.79e-05
CFC1	24.0206	-2.80809	0.628499	-4.46794	7.9e-06	8.91e-05
C12orf75	2348.02	-0.861274	0.192857	-4.46586	7.97e-06	9e-05
CD276	2315.68	-0.509418	0.114075	-4.46564	7.98e-06	9e-05
LTA4H	3132.25	-0.450971	0.100998	-4.46516	8e-06	9.01e-05
TAC3	123.869	-1.19196	0.26696	-4.46492	8.01e-06	9.02e-05
CFAP43	151.686	-1.35451	0.303415	-4.46422	8.04e-06	9.04e-05
FAM163B	225.731	0.843083	0.188892	4.4633	8.07e-06	9.07e-05
INSRR	94.7897	-1.51421	0.339377	-4.46173	8.13e-06	9.13e-05
TNFRSF1B	7.74395	-4.35263	0.9759	-4.46012	8.19e-06	9.2e-05
SLC39A9	3885.39	-0.371224	0.0832841	-4.45731	8.3e-06	9.31e-05
KAT6B	2799.08	0.931717	0.209043	4.45706	8.31e-06	9.31e-05
SUSD5	215.998	-1.34337	0.301527	-4.45523	8.38e-06	9.39e-05
PCGF3	3145.13	0.349133	0.0783914	4.45372	8.44e-06	9.45e-05
STMN1	32994.3	0.44584	0.100109	4.45355	8.45e-06	9.45e-05
GRIP1	2107.7	0.863676	0.193939	4.45334	8.45e-06	9.45e-05
CCL2	28.0431	-1.89678	0.425983	-4.45271	8.48e-06	9.47e-05
LSM6	486.022	0.398148	0.0894513	4.45101	8.55e-06	9.54e-05
MRPL49	1735.56	-0.395439	0.0888551	-4.45039	8.57e-06	9.56e-05
NTRK3	1501.92	0.450016	0.101116	4.4505	8.57e-06	9.56e-05
IFITM10	551.277	-1.22196	0.2746	-4.44997	8.59e-06	9.57e-05
SAMD4B	2212.74	-0.412673	0.0927506	-4.44928	8.62e-06	9.59e-05
ADAM11	287.907	0.736649	0.165585	4.44876	8.64e-06	9.61e-05
IMMP1L	62.8083	0.849468	0.190994	4.44762	8.68e-06	9.65e-05
GBP3	37.4717	-3.1259	0.702985	-4.44661	8.72e-06	9.69e-05
NAV3	4635.88	0.481282	0.108266	4.44535	8.77e-06	9.74e-05
TRIL	1269.01	-1.25245	0.281925	-4.4425	8.89e-06	9.87e-05
FZD4	253.061	-1.07167	0.241302	-4.44118	8.95e-06	9.92e-05
LOC285074	349.073	0.398627	0.089769	4.44059	8.97e-06	9.94e-05
FANCC	486.254	0.421274	0.0948834	4.43991	9e-06	9.97e-05
ZFAND3	6025.25	-0.303408	0.0683477	-4.43918	9.03e-06	9.99e-05
CCSER1	866.666	0.867071	0.195342	4.43873	9.05e-06	0.00010007
CFAP46	104.4	-1.08513	0.244616	-4.43604	9.16e-06	0.000101263
PPP2R5A	1265.5	-0.532122	0.119981	-4.43507	9.2e-06	0.00010165
OFD1	562.1	0.483963	0.109127	4.43485	9.21e-06	0.000101687
SH3PXD2A	3276.05	-0.551202	0.1244	-4.43088	9.38e-06	0.000103505
ZNF839	625.87	0.364721	0.0824129	4.42554	9.62e-06	0.00010603
INHBA	93.3818	1.56875	0.354584	4.42421	9.68e-06	0.000106611
MKKS	1674.05	0.314677	0.0711369	4.42354	9.71e-06	0.000106872
DYDC2	75.0778	-1.09481	0.24752	-4.42313	9.73e-06	0.000107001
TBC1D8B	30.5977	-1.42085	0.321254	-4.42283	9.74e-06	0.000107078
ABHD4	2033.38	-0.76122	0.172152	-4.4218	9.79e-06	0.000107522
HLA.DRA	37.4859	-2.56516	0.580204	-4.42114	9.82e-06	0.000107777
SGMS1	669.783	-0.400222	0.0905298	-4.42089	9.83e-06	0.00010783
TRIM5	337.454	-0.643288	0.145528	-4.42036	9.85e-06	0.000108019
PCDHB5	1045.4	-2.91697	0.66003	-4.41945	9.9e-06	0.000108405
FBLIM1	537.664	0.487924	0.110426	4.41855	9.94e-06	0.00010871
UBXN2B	3853.8	0.411771	0.093191	4.41857	9.94e-06	0.00010871
ZNF695	104.717	1.17858	0.266771	4.41794	9.96e-06	0.0001088
X02.Sep	15990.3	-0.418112	0.0946384	-4.418	9.96e-06	0.0001088
TAF2	1754.62	0.357138	0.0808381	4.41795	9.96e-06	0.0001088
CD74	62.4206	-1.77851	0.402618	-4.41737	9.99e-06	0.000109015
TRIM33	5308.02	0.390274	0.0883625	4.41674	1e-05	0.000109261
NIPBL.AS1	3066.17	0.301661	0.0683019	4.41658	1e-05	0.000109266
ADAM19	691.615	0.635744	0.143957	4.41621	1e-05	0.000109345
FKBP9	4077.61	-0.700536	0.158631	-4.41614	1e-05	0.000109345
NPHP1	160.103	-1.22738	0.277996	-4.4151	1.01e-05	0.000109797
TWIST1	35.2077	-5.86834	1.32928	-4.41469	1.01e-05	0.000109881
CALU	6447.74	-0.486289	0.110153	-4.41465	1.01e-05	0.000109881
SLITRK1	2576.4	0.471872	0.1069	4.41416	1.01e-05	0.000110057
HS1BP3	373.746	-0.675712	0.153108	-4.4133	1.02e-05	0.00011042
PAFAH1B3	1166.79	0.446144	0.101118	4.41213	1.02e-05	0.000110945
LEPR	539.485	-0.727464	0.165023	-4.40824	1.04e-05	0.000112881
PDIK1L	3214.55	0.37563	0.0852171	4.40792	1.04e-05	0.000112904
OAS3	25.2816	-1.49134	0.338327	-4.40799	1.04e-05	0.000112904
RBM24	386.975	-0.992693	0.225359	-4.40494	1.06e-05	0.000114388
AFF1	562.054	-0.645958	0.146669	-4.40419	1.06e-05	0.000114708
ITGA8	42.5238	-1.52521	0.346356	-4.40359	1.06e-05	0.000114951
JPH2	10.9918	-2.66927	0.606257	-4.40286	1.07e-05	0.000115261
C5orf30	2862.07	-0.432295	0.098206	-4.40192	1.07e-05	0.000115688
PLEKHM1	606.363	-0.488472	0.110999	-4.40069	1.08e-05	0.000116266
GMPR	143.091	-1.51776	0.344935	-4.40014	1.08e-05	0.000116484
APOOL	1506.22	-0.516263	0.117411	-4.39705	1.1e-05	0.000118077
MURC	277.844	1.05833	0.240752	4.39592	1.1e-05	0.000118617
NPAS4	26.5246	1.86412	0.424335	4.39303	1.12e-05	0.000120047
CRB2	780.324	-0.717757	0.16338	-4.39316	1.12e-05	0.000120047
SCNN1B	15.346	-2.48387	0.565482	-4.39248	1.12e-05	0.000120275
GLRA3	175.088	-1.2827	0.292058	-4.39195	1.12e-05	0.000120489
C7orf13	418.313	-0.571209	0.130108	-4.39026	1.13e-05	0.000121349
SLC44A2	5805.14	-0.507997	0.11574	-4.38914	1.14e-05	0.000121897
SRPK1	2368.44	0.378367	0.0862183	4.38848	1.14e-05	0.000122185
LGR6	50.0427	-3.6646	0.835201	-4.38769	1.15e-05	0.00012255
RBM45	280.041	0.423515	0.096544	4.38675	1.15e-05	0.000122999
ADCK1	187.588	0.625989	0.142746	4.38532	1.16e-05	0.000123729
TRNAU1AP	493.676	0.443877	0.101258	4.38361	1.17e-05	0.000124623
DPYD	275.165	-1.1613	0.26507	-4.38111	1.18e-05	0.000125982
PLRG1	3248.03	-0.296614	0.0677217	-4.3799	1.19e-05	0.000126602
XBP1	2426.37	-0.578537	0.1321	-4.37953	1.19e-05	0.000126731
PDE11A	128.127	-1.01926	0.232821	-4.37788	1.2e-05	0.000127614
ARHGEF37	305.842	-1.22355	0.279569	-4.37656	1.21e-05	0.000128305
HIPK1	5103.11	-0.334397	0.0764272	-4.37536	1.21e-05	0.00012893
UBE2Q2P1	43.6141	1.07084	0.244789	4.37456	1.22e-05	0.000129317
TMEM178A	840.719	-1.10537	0.252702	-4.37421	1.22e-05	0.000129442
SEMA6B	4116.23	0.377508	0.0863177	4.37347	1.22e-05	0.000129795
TOB1	1673.5	-0.448878	0.102657	-4.3726	1.23e-05	0.000130106
OSTC	1328.78	-0.552836	0.12643	-4.37266	1.23e-05	0.000130106
PROSC	1749.52	-0.371119	0.0848752	-4.37253	1.23e-05	0.000130106
TLE6	174.553	-1.07261	0.245323	-4.37223	1.23e-05	0.000130199
AMIGO1	965.468	-0.673079	0.154021	-4.37006	1.24e-05	0.000131414
C1orf43	5924.85	-0.309022	0.0707489	-4.36788	1.25e-05	0.000132632
PPP1R14C	1247.77	-1.24529	0.28511	-4.36776	1.26e-05	0.000132632
PPP1R3C	1024.49	-1.04635	0.239618	-4.36674	1.26e-05	0.000133168
CFL2	3142.78	-0.357522	0.0818883	-4.36597	1.27e-05	0.000133383
LCAT	43.3138	-1.17246	0.268548	-4.36591	1.27e-05	0.000133383
DHX57	2793.7	0.283605	0.0649552	4.36617	1.26e-05	0.000133383
ME1	548.994	-0.854745	0.195781	-4.36583	1.27e-05	0.000133383
CLSTN2	1868.74	-0.965055	0.221091	-4.36497	1.27e-05	0.000133821
ATG9A	2430.13	-0.435217	0.0997492	-4.36311	1.28e-05	0.000134876
COASY	1891.66	-0.407746	0.0934608	-4.36275	1.28e-05	0.00013501
A2M	469.056	-3.42956	0.786361	-4.3613	1.29e-05	0.000135733
DOK4	2748.25	0.338117	0.0775291	4.36116	1.29e-05	0.000135733
RBPMS	66.4592	-1.36766	0.313579	-4.36144	1.29e-05	0.000135733
SLC8B1	96.9433	-0.69023	0.158313	-4.35991	1.3e-05	0.000136428
CSF1	239.869	-0.804007	0.184427	-4.35949	1.3e-05	0.000136599
HEYL	10.1846	-2.50464	0.574752	-4.35777	1.31e-05	0.000137503
GPI	14998.2	-0.357202	0.0819685	-4.35779	1.31e-05	0.000137503
KIAA0895L	3319.61	0.479846	0.110125	4.35728	1.32e-05	0.000137636
IRS4	773.999	-1.79462	0.411856	-4.35739	1.32e-05	0.000137636
IFI35	31.0549	-1.70194	0.390658	-4.35659	1.32e-05	0.000137982
STAT4	157.18	0.605911	0.139117	4.35541	1.33e-05	0.000138637
ZNF239	299.613	0.443331	0.101822	4.35397	1.34e-05	0.000139465
TMC5	25.6722	-1.49243	0.342838	-4.35316	1.34e-05	0.00013989
FLII	2162.49	-0.320131	0.0735572	-4.35214	1.35e-05	0.000140456
UNCX	10.5585	2.52784	0.58089	4.35166	1.35e-05	0.000140669
ERBB2	1690.13	-0.481073	0.110554	-4.35148	1.35e-05	0.000140701
C19orf57	209.494	0.683607	0.157144	4.3502	1.36e-05	0.000141429
ABCB6	1544.94	-0.518467	0.119244	-4.34794	1.37e-05	0.000142726
AIF1L	506.086	1.4462	0.332618	4.34792	1.37e-05	0.000142726
TTC3P1	973.713	0.361994	0.0832963	4.34586	1.39e-05	0.00014398
XYLT2	529.993	-0.492139	0.113275	-4.34465	1.39e-05	0.000144688
ARHGAP42	416.933	-0.927027	0.213384	-4.34441	1.4e-05	0.000144753
SEMA7A	1104.19	0.62533	0.143955	4.34392	1.4e-05	0.000144987
SIPA1L2	4502.3	-0.80488	0.185295	-4.34377	1.4e-05	0.000144991
ARPIN	1637.98	-0.311269	0.0716909	-4.34183	1.41e-05	0.000146189
MSL3	1126.23	0.275203	0.0633967	4.34096	1.42e-05	0.000146672
BID	902.63	0.333405	0.076814	4.34042	1.42e-05	0.00014694
UBXN4	6087.26	-0.301939	0.0695972	-4.33838	1.44e-05	0.000148221
MT1E	11.1325	-3.46153	0.798221	-4.33656	1.45e-05	0.000149358
HIST1H2BD	582.085	0.726602	0.167584	4.33575	1.45e-05	0.000149814
WEE2.AS1	85.0109	-0.691737	0.15956	-4.33529	1.46e-05	0.000150034
KIAA1522	1315.33	-0.391199	0.0902563	-4.33432	1.46e-05	0.000150602
GFOD2	2907.47	0.365409	0.0843284	4.33316	1.47e-05	0.000151298
RHOA	9575.7	-0.468788	0.10821	-4.33219	1.48e-05	0.000151877
PLK2	2482.66	0.455882	0.105278	4.33029	1.49e-05	0.000153094
CALB1	1426.84	-1.66644	0.384945	-4.32902	1.5e-05	0.00015388
RASSF5	284.352	-0.934692	0.215927	-4.32874	1.5e-05	0.000153979
SLC39A12	104.871	1.08694	0.251112	4.32849	1.5e-05	0.000154059
TIA1	2162.21	0.64658	0.149441	4.32665	1.51e-05	0.000155253
FAM92B	92.7431	-1.69413	0.391604	-4.32612	1.52e-05	0.000155531
LMNA	1160.46	-0.565696	0.130771	-4.32586	1.52e-05	0.00015562
GLUL	13656.4	-0.541591	0.125217	-4.32522	1.52e-05	0.000155973
SLC35E2	2433.23	0.565291	0.130712	4.32469	1.53e-05	0.000156152
BTG3	2122.17	-0.740439	0.171208	-4.32479	1.53e-05	0.000156152
LEPROT	1421.3	-0.406887	0.0940965	-4.32414	1.53e-05	0.000156445
UBE2D1	1942.44	0.333466	0.0771256	4.32368	1.53e-05	0.000156677
CLDN5	64.774	-1.22236	0.282824	-4.32197	1.55e-05	0.000157796
AMER3	1652.81	0.367218	0.0849997	4.32022	1.56e-05	0.000158851
WFDC3	11.7391	-2.33559	0.540611	-4.32028	1.56e-05	0.000158851
DYSF	30.307	-1.45946	0.338034	-4.31751	1.58e-05	0.000160614
SRPX	177.434	-1.66926	0.386627	-4.31751	1.58e-05	0.000160614
ARSI	24.1006	-2.54044	0.588585	-4.31618	1.59e-05	0.000161486
ADAMTS12	194.856	-0.93466	0.21664	-4.31434	1.6e-05	0.000162732
PCDHGA6	74.2246	-2.16488	0.501991	-4.31259	1.61e-05	0.00016393
IMPACT	2943.72	-0.653665	0.151594	-4.31194	1.62e-05	0.00016431
SDC2	4078.01	-0.881862	0.204526	-4.31174	1.62e-05	0.000164353
TXNRD2	129.455	-2.87101	0.666015	-4.31072	1.63e-05	0.000165011
PIGQ	991.347	-0.579274	0.134409	-4.30978	1.63e-05	0.000165616
TLE2	1549.6	-0.459429	0.106613	-4.30932	1.64e-05	0.000165857
RASSF2	2476.2	1.05966	0.246138	4.30513	1.67e-05	0.000168817
SLC35D2	113.426	-0.745762	0.173226	-4.30513	1.67e-05	0.000168817
ELMOD1	2251.85	0.729945	0.169568	4.30473	1.67e-05	0.000169015
C4orf27	1707.9	0.329496	0.0765865	4.30228	1.69e-05	0.000170793
ITPRIP	423.204	-0.686534	0.159606	-4.30142	1.7e-05	0.000171348
TMEM74	251.133	0.815125	0.189586	4.2995	1.71e-05	0.000172737
KIAA2013	1203.71	-0.404152	0.0940096	-4.29905	1.72e-05	0.000172981
ABCC6	26.7609	-1.35905	0.316238	-4.29756	1.73e-05	0.000174039
CERS5	1307.38	0.324819	0.0755982	4.29664	1.73e-05	0.000174654
COL12A1	68.4588	-1.77666	0.413684	-4.29473	1.75e-05	0.00017606
AP1S2	4948.73	0.418459	0.0974677	4.29331	1.76e-05	0.000177076
FAT1	8419.15	-0.618825	0.144164	-4.29251	1.77e-05	0.000177607
GOLGA8N	92.1325	-0.781137	0.181989	-4.29222	1.77e-05	0.000177732
SPAG6	345.954	-2.89809	0.675268	-4.29176	1.77e-05	0.000177885
GYS1	1337.94	-0.437261	0.101883	-4.29181	1.77e-05	0.000177885
RRP1B	2363.12	0.265339	0.0618323	4.29127	1.78e-05	0.000178165
FGFR1	4186.65	-0.697886	0.162652	-4.29068	1.78e-05	0.00017853
ANAPC7	1685.83	0.239455	0.0558157	4.2901	1.79e-05	0.000178891
SLC18A2	549.269	0.611187	0.142476	4.28975	1.79e-05	0.000179059
GPR149	199.996	1.35718	0.316414	4.28926	1.79e-05	0.000179348
HMP19	47732.9	0.304893	0.0710875	4.28898	1.79e-05	0.000179463
COQ3	324.909	0.502105	0.117139	4.28642	1.82e-05	0.000181432
FBXO28	1584.07	0.329824	0.0769571	4.28582	1.82e-05	0.000181813
ALDH6A1	2400.94	-0.466904	0.109019	-4.28277	1.85e-05	0.000184208
ZNF789	133.449	0.788143	0.184076	4.28161	1.86e-05	0.000185061
PCDHB3	409.32	0.498117	0.116369	4.28049	1.86e-05	0.000185878
GBA	575.103	-0.660183	0.154253	-4.27988	1.87e-05	0.000186134
KCNC1	1366.36	0.384847	0.0899185	4.27995	1.87e-05	0.000186134
IP6K3	30.9263	-2.02344	0.472791	-4.27978	1.87e-05	0.000186134
LRRN2	3127.19	-0.729652	0.170516	-4.27908	1.88e-05	0.000186605
COL6A2	1192.73	-0.845047	0.197504	-4.27863	1.88e-05	0.000186875
PPP1R3G	49.5764	-1.63496	0.382233	-4.27738	1.89e-05	0.000187807
ANKS1B	1999.47	0.604959	0.141437	4.27724	1.89e-05	0.00018781
ENO1	39172.1	-0.491601	0.115032	-4.27361	1.92e-05	0.000190779
LRRIQ1	426.945	-1.10761	0.259182	-4.27348	1.92e-05	0.000190779
CEP19	858.846	0.399501	0.0935011	4.27269	1.93e-05	0.000191112
CYP39A1	100.981	-1.10541	0.258711	-4.27274	1.93e-05	0.000191112
EMC2	1839.76	-0.621482	0.14545	-4.27282	1.93e-05	0.000191112
FAM217B	2702.69	0.329481	0.0771186	4.27239	1.93e-05	0.000191251
GINM1	1989.58	-0.551351	0.129084	-4.27125	1.94e-05	0.000192116
HYLS1	247.334	0.445259	0.104275	4.27005	1.95e-05	0.000193032
TAF9	1253.56	0.319625	0.074861	4.26958	1.96e-05	0.000193328
CDC7	862.91	0.835021	0.195589	4.26925	1.96e-05	0.000193493
PTN	14111.8	0.673898	0.157866	4.26879	1.97e-05	0.000193779
CACNA1B	2104.44	0.416461	0.0975787	4.26795	1.97e-05	0.000194389
C14orf39	51.4651	-2.71852	0.63717	-4.26655	1.99e-05	0.000195498
CRK	4361.46	0.182546	0.0427893	4.26617	1.99e-05	0.000195716
HDLBP	14907.8	-0.330673	0.0775292	-4.26515	2e-05	0.000196376
KDM1B	1969.02	0.332925	0.078056	4.26521	2e-05	0.000196376
VWA5B1	190.924	-1.00323	0.235443	-4.26104	2.03e-05	0.000199902
LINC00476	333.395	0.675966	0.158684	4.25983	2.05e-05	0.000200861
NLRX1	316.173	-0.724402	0.170078	-4.25923	2.05e-05	0.000201285
LOC100506606	69.0205	2.46862	0.57975	4.25807	2.06e-05	0.000202207
MGC57346	450.021	0.424538	0.0997069	4.25786	2.06e-05	0.000202278
EIF4G1	10559.6	-0.209366	0.0491939	-4.25594	2.08e-05	0.000203898
STAT1	2843.3	-0.407416	0.0957657	-4.25431	2.1e-05	0.000205271
SLC44A5	1146.6	-0.71071	0.167089	-4.25347	2.1e-05	0.000205912
PPIC	83.0402	-0.92996	0.218718	-4.25187	2.12e-05	0.000207265
C4orf32	199.555	1.5733	0.370089	4.25113	2.13e-05	0.000207834
CHP1	3766.62	-0.508486	0.119682	-4.24863	2.15e-05	0.000210042
AAED1	130.07	-0.899141	0.211664	-4.24796	2.16e-05	0.000210545
TBC1D8	405.239	0.402667	0.0947985	4.24761	2.16e-05	0.000210744
LOC151484	27.5225	1.23059	0.289725	4.24745	2.16e-05	0.000210766
RHNO1	1498.59	0.356004	0.0838951	4.24345	2.2e-05	0.000214439
RNF43	48.4704	-1.91008	0.450169	-4.24303	2.21e-05	0.000214707
PQLC3	109.26	-0.707561	0.166833	-4.24113	2.22e-05	0.000216353
LRPAP1	4246.93	-0.448468	0.105748	-4.24092	2.23e-05	0.000216353
NEK6	1449.49	-0.563413	0.13285	-4.24098	2.23e-05	0.000216353
DLK1	534.981	-1.33647	0.315244	-4.23947	2.24e-05	0.000217623
ADAM17	2400.7	-0.350463	0.082689	-4.23833	2.25e-05	0.000218604
ITGAV	4712.1	-0.645349	0.152283	-4.23781	2.26e-05	0.000218898
TOP2B	26659.2	0.437487	0.103235	4.23776	2.26e-05	0.000218898
WHAMM	541.999	-0.449664	0.106176	-4.23508	2.28e-05	0.000221395
CAMKK2	1990.51	0.975589	0.230379	4.23471	2.29e-05	0.000221625
SSH2	3707.33	0.40373	0.0953632	4.2336	2.3e-05	0.000222459
PPP2R3A	3341.86	0.40218	0.0949951	4.23369	2.3e-05	0.000222459
CDK11A	629.485	0.54846	0.129602	4.23189	2.32e-05	0.000224026
MPP5	2854.25	-0.399245	0.0943615	-4.23102	2.33e-05	0.000224764
DDX46	3056.83	0.470422	0.111208	4.23012	2.34e-05	0.000225536
LRRC28	561.731	-0.35899	0.0848926	-4.22876	2.35e-05	0.00022677
PARP9	233.862	-1.05996	0.250691	-4.22816	2.36e-05	0.000227243
GALNT1	5115.15	0.451741	0.106998	4.22196	2.42e-05	0.000233443
SERPING1	190.226	-1.52348	0.360916	-4.22114	2.43e-05	0.000234152
VSTM4	665.528	-0.99373	0.235511	-4.21947	2.45e-05	0.00023576
CSRNP3	15255.2	0.437066	0.10359	4.2192	2.45e-05	0.000235905
RNF13	2459.75	-0.499849	0.118524	-4.21729	2.47e-05	0.000237766
IGLON5	3160.79	0.908133	0.215365	4.21671	2.48e-05	0.000238239
S100A11	48.9101	-2.3075	0.547255	-4.2165	2.48e-05	0.000238321
TUBB4B	5142.59	-0.44792	0.106253	-4.2156	2.49e-05	0.000239131
ZNF345	186.63	0.59974	0.142273	4.21541	2.49e-05	0.000239202
TMEM237	1809.12	0.340855	0.0809337	4.21154	2.54e-05	0.000243108
LPAR1	787.937	-1.3739	0.326228	-4.21148	2.54e-05	0.000243108
S100PBP	1889.61	-0.332271	0.078907	-4.21092	2.54e-05	0.000243578
S1PR3	504.474	-1.33086	0.316092	-4.21037	2.55e-05	0.000244028
PDLIM2	85.5613	-0.847474	0.201322	-4.20955	2.56e-05	0.000244765
MINOS1	670.92	0.401405	0.0953625	4.20925	2.56e-05	0.000244804
NSMCE4A	476.095	0.52341	0.124346	4.20929	2.56e-05	0.000244804
PAK1	4923.7	0.263718	0.0626709	4.20799	2.58e-05	0.000245965
TMEM8B	1938.96	-0.47741	0.113455	-4.20792	2.58e-05	0.000245965
SPAST	6010.59	0.426994	0.101482	4.20759	2.58e-05	0.000246182
AGBL4	131.723	-1.50335	0.357396	-4.2064	2.59e-05	0.000247338
LGALS1	194.729	-1.55375	0.369439	-4.20571	2.6e-05	0.000247945
USP53	642.232	-0.56442	0.134208	-4.20555	2.6e-05	0.000247976
FGF2	1186.62	-0.816242	0.194106	-4.20513	2.61e-05	0.000248291
DLEC1	25.8124	-2.00477	0.476812	-4.20454	2.62e-05	0.000248797
SCN4B	1018.28	-0.765846	0.182181	-4.20377	2.63e-05	0.000249362
OTOR	13.2982	-3.80222	0.90448	-4.20377	2.63e-05	0.000249362
CBLN1	1659.7	-1.55111	0.369053	-4.20296	2.63e-05	0.00025011
SDE2	1716.38	-0.318904	0.0758839	-4.20253	2.64e-05	0.000250437
JAKMIP2	3969.98	0.478775	0.113978	4.20058	2.66e-05	0.000252458
SCML4	89.0509	0.667214	0.15888	4.19948	2.68e-05	0.000253243
ZBTB34	1620.18	0.493951	0.117618	4.19961	2.67e-05	0.000253243
OCRL	4931.73	-0.351987	0.0838161	-4.19951	2.67e-05	0.000253243
DCN	679.136	-2.90131	0.691007	-4.19867	2.68e-05	0.000254003
FAM26F	11.7074	1.56873	0.373651	4.19839	2.69e-05	0.00025417
C9orf64	19.9124	-2.29392	0.546607	-4.19665	2.71e-05	0.000255986
COPG2IT1	28368.7	-0.840361	0.200382	-4.19379	2.74e-05	0.000259083
NHSL2	139.658	-0.99067	0.236346	-4.19161	2.77e-05	0.000261439
GRIK4	1110.06	-1.05345	0.251339	-4.19133	2.77e-05	0.000261615
ADGRG2	114.367	-1.78028	0.424769	-4.19117	2.78e-05	0.00026165
FAM122B	583.556	-0.412341	0.0983922	-4.19079	2.78e-05	0.000261931
MYLK2	11.9447	-1.97733	0.471842	-4.19066	2.78e-05	0.000261937
SLC9A3R1	540.745	-0.742988	0.177357	-4.18923	2.8e-05	0.000263434
NRBP2	940.599	-0.557214	0.133015	-4.1891	2.8e-05	0.000263434
INSM2	237.388	-1.28943	0.308052	-4.18576	2.84e-05	0.000267185
SDHD	1306.57	-0.385427	0.092096	-4.18505	2.85e-05	0.000267867
PPT1	4780.86	-0.487149	0.116427	-4.18415	2.86e-05	0.000268784
LOC101927151	219.12	0.682762	0.163188	4.18389	2.87e-05	0.000268927
TRPC1	806.968	0.354511	0.0847388	4.18358	2.87e-05	0.000269149
CDC73	2498.25	-0.361887	0.0865074	-4.18331	2.87e-05	0.000269313
MDGA1	1182.66	0.981791	0.234704	4.1831	2.88e-05	0.000269402
ODF3B	27.7044	-1.68302	0.402411	-4.18234	2.89e-05	0.000270154
CDKN1B	9445.25	-0.395962	0.0946799	-4.18211	2.89e-05	0.000270271
MRPS6	1495.24	-0.825179	0.197529	-4.17752	2.95e-05	0.000275626
THNSL2	211.421	-2.1786	0.521525	-4.17737	2.95e-05	0.000275647
CALCOCO2	1224.75	-0.574744	0.137617	-4.1764	2.96e-05	0.000276671
ARID4A	3415.67	0.412177	0.098703	4.17593	2.97e-05	0.000277082
CACNG8	4229.23	0.441682	0.105846	4.17287	3.01e-05	0.000280517
SPEG	973.886	0.368036	0.088195	4.17299	3.01e-05	0.000280517
CPA2	11.5795	-1.71115	0.410104	-4.17247	3.01e-05	0.000280842
LINC01521	525	0.471429	0.113002	4.17188	3.02e-05	0.000281413
HIST2H2BC	26.2004	2.10261	0.504037	4.17154	3.03e-05	0.000281511
HRH2	62.7174	0.834661	0.200082	4.17159	3.02e-05	0.000281511
TRIM56	332.178	-0.977784	0.234429	-4.17092	3.03e-05	0.00028212
GALE	565.081	0.425328	0.102023	4.16896	3.06e-05	0.000284374
C1orf216	3125.19	0.334393	0.0802123	4.16885	3.06e-05	0.000284374
TIPIN	260.991	0.520395	0.124877	4.16725	3.08e-05	0.000286205
TRDN	110.16	-2.85651	0.685537	-4.16682	3.09e-05	0.000286592
STK3	209.616	-0.736488	0.17676	-4.16661	3.09e-05	0.000286689
FANK1	101.157	-1.23697	0.296908	-4.16617	3.1e-05	0.000286923
PABPC4L	54.7033	-1.16501	0.279627	-4.16629	3.1e-05	0.000286923
PICK1	948.939	0.459748	0.110378	4.16523	3.11e-05	0.000287941
MIMT1	33.763	-2.71754	0.652477	-4.16496	3.11e-05	0.000288113
LEPROTL1	3465.37	0.232332	0.055802	4.1635	3.13e-05	0.000289803
CLVS2	3310.34	0.544	0.130668	4.16321	3.14e-05	0.000290004
C8orf37	464.515	-0.546821	0.131355	-4.16293	3.14e-05	0.000290202
SERP1	5277	-0.349024	0.0838513	-4.16241	3.15e-05	0.000290695
VPS29	1930.46	0.270337	0.0649881	4.1598	3.19e-05	0.000293875
HDAC11	1009.99	-0.515552	0.123965	-4.15885	3.2e-05	0.000294935
NINJ1	405.554	-0.602221	0.144863	-4.15717	3.22e-05	0.000296936
LINC00403	1547.49	-0.570783	0.137342	-4.15591	3.24e-05	0.000298417
PC	1036.46	-0.748642	0.180196	-4.15461	3.26e-05	0.000299947
MED18	419.764	0.340498	0.0819595	4.15446	3.26e-05	0.000299974
TMSB15A	2256.39	0.564491	0.135942	4.15244	3.29e-05	0.000302466
MARVELD2	43.0109	-1.41668	0.341233	-4.15166	3.3e-05	0.000303328
IRF1	78.046	-0.906255	0.218318	-4.15107	3.31e-05	0.000303937
CPEB1	554.903	-0.95724	0.230676	-4.14971	3.33e-05	0.000305582
LSM8	2121.55	0.397751	0.0958699	4.14886	3.34e-05	0.000306549
PCDHA8	42.8158	1.2594	0.303853	4.14478	3.4e-05	0.000311884
TUBA4A	545.64	-1.38522	0.334416	-4.14221	3.44e-05	0.000315221
NUTM2F	43.3636	-1.2593	0.304046	-4.14181	3.45e-05	0.000315598
EPB41	2478.25	0.328307	0.0792773	4.14125	3.45e-05	0.000316195
HOPX	681.854	1.63736	0.395762	4.13723	3.52e-05	0.000321595
SPIRE1	6706.63	-0.449893	0.108751	-4.13692	3.52e-05	0.000321772
ANGPTL4	291.009	-2.28045	0.551269	-4.13672	3.52e-05	0.000321772
LOC389895	96.0514	0.82128	0.19853	4.1368	3.52e-05	0.000321772
TAGLN2	1264.01	-1.17093	0.283122	-4.13578	3.54e-05	0.000322907
NSMCE1	738.797	-0.438141	0.105948	-4.13544	3.54e-05	0.000322917
CHN2	2145.96	0.673019	0.162746	4.13539	3.54e-05	0.000322917
PDE7A	922.158	0.646294	0.156281	4.13547	3.54e-05	0.000322917
SCAI	3472.65	0.437036	0.105696	4.13484	3.55e-05	0.000323514
LINC01572	102.122	1.19068	0.288237	4.1309	3.61e-05	0.000328927
SRRM3	508.818	0.35925	0.0870015	4.12924	3.64e-05	0.000331129
RANBP9	4460.29	-0.391359	0.0948099	-4.12783	3.66e-05	0.000332985
G0S2	65.3693	-1.08787	0.263575	-4.12739	3.67e-05	0.000333435
FNDC4	1565.19	0.395758	0.0958994	4.12681	3.68e-05	0.000334093
ATF7	516.826	-0.482092	0.116827	-4.12654	3.68e-05	0.000334292
FUS	10737.9	0.443322	0.107443	4.1261	3.69e-05	0.000334742
OSBP	4584.88	-0.306846	0.0743748	-4.12568	3.7e-05	0.000335183
DCC	4179.66	0.85066	0.206226	4.12488	3.71e-05	0.000336151
CEPT1	1225.21	-0.416146	0.100922	-4.12346	3.73e-05	0.000337924
SNRK	1708.65	0.377317	0.091506	4.12342	3.73e-05	0.000337924
HSF1	1578.24	-0.424176	0.102925	-4.12119	3.77e-05	0.000341014
KLHL12	3254.77	0.295692	0.0717543	4.1209	3.77e-05	0.000341123
IQCH	155.207	-1.11893	0.271527	-4.12087	3.77e-05	0.000341123
ZNF783	620.247	0.451799	0.109675	4.11943	3.8e-05	0.00034307
KNOP1	927.937	0.256713	0.0623228	4.11909	3.8e-05	0.00034339
GUCY1A2	2292.34	0.823083	0.199887	4.11774	3.83e-05	0.000345217
NHS	1564.27	-0.616727	0.149812	-4.11666	3.84e-05	0.000346635
GPR137C	2847.05	0.356298	0.086553	4.11654	3.85e-05	0.000346636
SLC25A23	3323.18	-0.369156	0.0896959	-4.11564	3.86e-05	0.000347791
SAV1	1189.21	-0.405769	0.0986044	-4.11512	3.87e-05	0.000348357
NPR2	247.758	-0.54746	0.13304	-4.11501	3.87e-05	0.000348357
TNIK	6121.51	-0.625569	0.152076	-4.11352	3.9e-05	0.000350426
NCBP1	3197.29	0.27672	0.0672915	4.11226	3.92e-05	0.000352155
CDC42EP3	2763.17	0.612357	0.148926	4.11184	3.93e-05	0.000352604
ARL1	3325.92	-0.503366	0.122424	-4.11167	3.93e-05	0.000352662
C12orf43	720.195	0.341409	0.083045	4.11113	3.94e-05	0.000353298
ZFHX2	643.732	0.63908	0.155474	4.11053	3.95e-05	0.000354015
ADAM23	2644.42	0.422905	0.102911	4.10941	3.97e-05	0.000355543
HLA.DQA1	28.143	-1.70334	0.414844	-4.10599	4.03e-05	0.000360661
TTC7A	345.867	-0.475031	0.115704	-4.10556	4.03e-05	0.000360927
HLTF	4501.23	0.338574	0.0824669	4.10557	4.03e-05	0.000360927
C2CD5	3162.72	0.277162	0.0675383	4.10377	4.06e-05	0.00036353
ZNF880	497.856	-0.80552	0.196308	-4.10335	4.07e-05	0.000364004
TRMT6	773.612	0.34088	0.0830784	4.10312	4.08e-05	0.000364168
HCG23	43.4	-1.12302	0.273757	-4.10226	4.09e-05	0.000365122
GDPD2	320.033	-0.817129	0.199186	-4.10235	4.09e-05	0.000365122
FAM27E3	82.6469	0.745503	0.181743	4.10195	4.1e-05	0.000365403
C1orf106	71.3788	0.944544	0.230324	4.10094	4.11e-05	0.000366817
MUL1	1332.33	-0.252339	0.0615371	-4.10059	4.12e-05	0.000367159
JAG1	2081.49	-0.509759	0.12433	-4.10004	4.13e-05	0.000367644
ZMYND10	214.478	-1.55558	0.379402	-4.10009	4.13e-05	0.000367644
PTGDR2	23.6579	-1.37458	0.335323	-4.09929	4.14e-05	0.000368529
KGFLP2	431.895	2.23793	0.545939	4.09923	4.15e-05	0.000368529
CCDC102A	81.3324	-0.770309	0.187927	-4.09897	4.15e-05	0.000368734
ERICH3	379.657	-1.05075	0.256394	-4.09818	4.16e-05	0.000369803
TTC21A	68.07	0.965393	0.2356	4.0976	4.17e-05	0.000370531
BDH2	1199.82	-0.662356	0.161686	-4.09656	4.19e-05	0.000371406
SLC10A7	283.444	-0.58013	0.141614	-4.09655	4.19e-05	0.000371406
SLC25A27	1391.29	0.415648	0.101463	4.09656	4.19e-05	0.000371406
EFCAB1	171.236	-1.75937	0.429438	-4.09691	4.19e-05	0.000371406
AP3B2	2182.29	0.422628	0.103184	4.09586	4.21e-05	0.000372303
PNPLA4	714.954	-0.769956	0.187991	-4.09571	4.21e-05	0.000372356
DNAAF1	42.9776	-1.53492	0.374871	-4.09453	4.23e-05	0.000374049
PGBD1	753.688	0.411909	0.100627	4.09341	4.25e-05	0.000375651
C2orf40	47.6869	-1.58192	0.386474	-4.09321	4.25e-05	0.000375782
ACTC1	37.5708	0.947825	0.231607	4.09239	4.27e-05	0.000376912
OPRK1	197.463	-1.0954	0.267681	-4.09219	4.27e-05	0.000377028
SERINC5	3623.82	-0.62163	0.151911	-4.09206	4.28e-05	0.00037704
PAK7	3198.92	0.402727	0.0984663	4.09	4.31e-05	0.000380195
ZNF326	1059.88	0.371663	0.0908772	4.08972	4.32e-05	0.00038024
GEM	370.638	-0.529597	0.129492	-4.0898	4.32e-05	0.00038024
IMMP2L	304.021	-0.482212	0.117917	-4.08943	4.32e-05	0.000380526
PHF23	1365.55	0.288759	0.0706161	4.08914	4.33e-05	0.000380783
DUSP14	433.706	-0.533586	0.130507	-4.08857	4.34e-05	0.000381323
G6PC3	1235.52	-0.654793	0.16015	-4.08862	4.34e-05	0.000381323
SPATA20	1106.38	-0.677136	0.16569	-4.08676	4.37e-05	0.000384089
KLF16	312.538	0.589015	0.144137	4.08649	4.38e-05	0.000384336
CRMP1	38107.1	0.31349	0.0767207	4.08612	4.39e-05	0.000384571
DCDC2	254.338	-1.48073	0.362383	-4.0861	4.39e-05	0.000384571
CD93	15.6541	-3.02359	0.740188	-4.08489	4.41e-05	0.000386369
MEX3A	5916.5	0.690132	0.168988	4.08391	4.43e-05	0.000387804
FLOT2	2738.82	-0.309413	0.0757709	-4.08353	4.44e-05	0.000388226
DDX51	777.954	0.393483	0.096375	4.08284	4.45e-05	0.000389179
DZANK1	428.178	0.349988	0.0857535	4.08133	4.48e-05	0.000391507
TMED4	2340.17	-0.456426	0.111882	-4.07954	4.51e-05	0.000394322
SLC7A6	910.625	0.506724	0.124217	4.07934	4.52e-05	0.000394446
PGP	316.79	0.435059	0.106685	4.07799	4.54e-05	0.00039653
WISP1	9.43894	-3.88768	0.953876	-4.07567	4.59e-05	0.000400301
MARCKSL1	22782.1	0.379655	0.0931912	4.07393	4.62e-05	0.000403075
EGR3	92.0566	1.79459	0.440575	4.07329	4.64e-05	0.000403982
DNAJA4	419.431	-0.753345	0.184973	-4.07273	4.65e-05	0.000404731
PTK7	1441.17	-0.417561	0.102537	-4.07229	4.66e-05	0.000405287
EDNRB.AS1	22.4081	-2.62076	0.643744	-4.07113	4.68e-05	0.000407098
CHML	3439.85	0.598855	0.147119	4.07055	4.69e-05	0.00040767
HRH3	297.612	-1.30058	0.319502	-4.07066	4.69e-05	0.00040767
HCN4	1249.96	0.541304	0.13299	4.07025	4.7e-05	0.000407978
AK4	3935.05	-0.67037	0.164707	-4.07009	4.7e-05	0.000408046
GLG1	11695	-0.200694	0.0493123	-4.06985	4.7e-05	0.000408254
LRCH1	729.325	0.539061	0.1325	4.0684	4.73e-05	0.00041015
GAPDHS	74.4804	0.839911	0.206437	4.0686	4.73e-05	0.00041015
SMIM10	83.5951	-0.951871	0.233967	-4.06841	4.73e-05	0.00041015
BMP8A	44.5058	1.00643	0.24742	4.06771	4.75e-05	0.000411141
THAP9.AS1	1649.48	0.45185	0.111114	4.06653	4.77e-05	0.000412797
YY2	143.546	0.565424	0.139042	4.06657	4.77e-05	0.000412797
ARHGAP31	450.242	-0.870471	0.214085	-4.06601	4.78e-05	0.000413498
C11orf74	874.153	0.526327	0.129461	4.06554	4.79e-05	0.00041412
ZNF737	2015.28	0.401281	0.098722	4.06476	4.81e-05	0.000415284
TMEM231	1360.74	-0.582223	0.143245	-4.06451	4.81e-05	0.000415499
NOB1	1035.05	-0.400923	0.0986489	-4.06414	4.82e-05	0.000415947
BGN	29.1545	-2.03608	0.501234	-4.06214	4.86e-05	0.000419315
MPP3	793.18	0.269176	0.0662688	4.06188	4.87e-05	0.000419548
MAPKBP1	1245.41	0.572903	0.141085	4.0607	4.89e-05	0.000421448
CHAC2	61.2303	0.841057	0.207146	4.06022	4.9e-05	0.000422101
ENDOD1	1776.99	-0.651871	0.160602	-4.05893	4.93e-05	0.000424079
C1QTNF6	438.11	0.37707	0.0928998	4.05888	4.93e-05	0.000424079
GPR50	181.397	-2.53431	0.624423	-4.05865	4.94e-05	0.000424288
FILIP1L	177.344	-1.51958	0.374452	-4.05815	4.95e-05	0.00042496
CYP1B1	196.235	-3.36311	0.828923	-4.05721	4.97e-05	0.000426394
VDAC3	5528.63	0.343491	0.0846636	4.05712	4.97e-05	0.000426394
HSPB11	489.212	0.433639	0.106908	4.05621	4.99e-05	0.000427842
TAPBP	1500.9	-0.570196	0.140609	-4.0552	5.01e-05	0.000429471
B3GAT1	4789.6	0.30362	0.0748757	4.05499	5.01e-05	0.000429501
TNS1	1189.44	-0.757641	0.18685	-4.05481	5.02e-05	0.000429501
CHSY3	237.177	0.593835	0.146452	4.05481	5.02e-05	0.000429501
AKR7A2	772.791	-0.408991	0.100887	-4.05397	5.04e-05	0.000430825
SLC1A1	2204.58	0.389125	0.095989	4.05385	5.04e-05	0.000430825
LMF1	781.645	0.769746	0.189917	4.05307	5.05e-05	0.000432033
EPS8	2684.41	-0.589517	0.145459	-4.05279	5.06e-05	0.00043232
CTSA	438.069	-0.554109	0.136728	-4.05263	5.06e-05	0.0004324
SQSTM1	6023.69	-0.611338	0.150863	-4.05228	5.07e-05	0.000432817
TRIM7	163.37	0.545282	0.13458	4.05173	5.08e-05	0.00043361
ZMIZ2	3160.41	0.407781	0.100697	4.0496	5.13e-05	0.000437355
OTUD5	2516.23	-0.409262	0.101078	-4.04897	5.14e-05	0.000438309
CHCHD7	795.732	0.277468	0.0685462	4.0479	5.17e-05	0.000440071
LOC101927045	44.5263	-0.892391	0.220479	-4.0475	5.18e-05	0.000440597
RPS6KA5	489.036	0.443579	0.109703	4.04346	5.27e-05	0.000448042
TOM1L1	326.111	-0.694647	0.171819	-4.04289	5.28e-05	0.00044889
DAD1	1982.46	-0.508218	0.125725	-4.04229	5.29e-05	0.000449344
MIR762HG	114.383	0.614329	0.151975	4.04229	5.29e-05	0.000449344
WDR27	653.613	0.464229	0.114838	4.04247	5.29e-05	0.000449344
CPM	50.3933	-1.88405	0.466146	-4.04175	5.31e-05	0.000450138
LOC100129534	55.236	0.819784	0.202862	4.04109	5.32e-05	0.000450655
GLUD1	11258	-0.519699	0.128601	-4.04118	5.32e-05	0.000450655
GLT1D1	277.722	0.920457	0.22778	4.041	5.32e-05	0.000450655
PSPC1	2543.68	0.317341	0.0785237	4.04134	5.31e-05	0.000450655
PEX1	1233.7	0.331704	0.0820995	4.04027	5.34e-05	0.000451831
ZNF280D	793.236	-0.561103	0.138918	-4.03909	5.37e-05	0.000453865
ELOVL1	168.195	-0.625817	0.154977	-4.03813	5.39e-05	0.000455498
IL10RB	387.146	-0.403681	0.0999705	-4.038	5.39e-05	0.000455511
HSD17B7	391.978	-0.692314	0.171505	-4.03669	5.42e-05	0.000457834
LINC01315	223.207	-0.747065	0.1851	-4.03601	5.44e-05	0.000458915
ADAM1A	231.515	0.694283	0.172053	4.03529	5.45e-05	0.000460083
HCN3	1056.22	0.401113	0.0994381	4.0338	5.49e-05	0.000462545
LINC01159	71.4939	2.24767	0.557201	4.03387	5.49e-05	0.000462545
DPF1	3301.9	0.463408	0.114894	4.03335	5.5e-05	0.000463196
PHLDA1	4626.07	0.704113	0.174593	4.03288	5.51e-05	0.000463882
PROX1.AS1	40.5911	-1.93354	0.479528	-4.03218	5.53e-05	0.00046502
TSHZ1	2292.25	0.963096	0.238935	4.03079	5.56e-05	0.000467543
BARX1	19.794	-1.45972	0.362172	-4.03046	5.57e-05	0.000467957
IFITM3	78.6589	-1.41904	0.352131	-4.02988	5.58e-05	0.000468875
MKX	59.9596	-1.05878	0.262824	-4.02847	5.61e-05	0.000471188
QRFPR	30.9407	-1.58978	0.394648	-4.02836	5.62e-05	0.000471188
GPR22	159.177	1.20237	0.298467	4.02848	5.61e-05	0.000471188
MYLK3	105.306	-1.06546	0.264504	-4.02814	5.62e-05	0.000471391
ATP2B2	2520.5	0.597373	0.148309	4.0279	5.63e-05	0.000471574
C3orf62	242.194	0.509798	0.12657	4.02781	5.63e-05	0.000471574
MIR600HG	1336.53	0.727161	0.180695	4.02425	5.72e-05	0.000478513
MRPL43	816.614	-0.324229	0.0805879	-4.0233	5.74e-05	0.000480197
PIP5K1C	2825.87	0.368507	0.0916048	4.02279	5.75e-05	0.000480989
DPP8	1293.01	-0.335308	0.0833722	-4.02182	5.77e-05	0.000482727
GALNT18	513.775	-0.754888	0.187737	-4.02098	5.8e-05	0.00048421
BMF	285.846	0.876282	0.217943	4.02069	5.8e-05	0.000484569
EVI5	1093.4	-0.429141	0.106759	-4.01973	5.83e-05	0.000486286
LINC00884	36.086	-1.16773	0.290507	-4.01961	5.83e-05	0.00048629
CYB5R3	3051.02	-0.474797	0.118177	-4.01766	5.88e-05	0.000490074
AJUBA	158.513	-0.815029	0.202925	-4.0164	5.91e-05	0.000492466
UBE2G2	1676.8	0.467393	0.116376	4.01623	5.91e-05	0.000492561
CCDC88A	15466.5	0.489047	0.121775	4.01599	5.92e-05	0.000492787
TMEM248	3642.16	-0.333028	0.0829276	-4.01588	5.92e-05	0.000492787
GHDC	137.88	-0.830024	0.206902	-4.01168	6.03e-05	0.000501386
DLX6.AS1	4051.5	1.77921	0.443967	4.00754	6.14e-05	0.000510006
CNTNAP3B	103.642	0.692782	0.173001	4.0045	6.21e-05	0.000516335
TMEM41B	1885.34	-0.353613	0.08832	-4.00377	6.23e-05	0.000517668
ENTPD4	3486.2	0.317523	0.0793384	4.00213	6.28e-05	0.000521009
CDC42EP2	109.225	0.715279	0.178795	4.00056	6.32e-05	0.000523943
LIMD2	476.398	0.576153	0.144015	4.00066	6.32e-05	0.000523943
FAM227B	140.855	-0.798238	0.199572	-3.99975	6.34e-05	0.00052549
ZNF22	2516.01	0.325007	0.0812621	3.9995	6.35e-05	0.000525777
ASNS	5557.9	0.309933	0.077503	3.99898	6.36e-05	0.00052666
MX1	102.791	-0.937262	0.234414	-3.99832	6.38e-05	0.000527866
NT5E	46.3038	1.05748	0.26449	3.99819	6.38e-05	0.000527887
MAEL	20.3814	-1.33581	0.334224	-3.99674	6.42e-05	0.000530868
HEXB	1272.85	-0.557729	0.139562	-3.99628	6.43e-05	0.00053162
SGSH	402.619	-0.640387	0.160266	-3.99578	6.45e-05	0.000532485
SLC41A3	1775.98	-0.301022	0.0753434	-3.99534	6.46e-05	0.000533203
PGD	8264.12	-0.29752	0.0744829	-3.99447	6.48e-05	0.00053488
DOPEY1	1685.34	0.43094	0.107901	3.99385	6.5e-05	0.000536012
APOBEC3F	23.8294	-2.05301	0.514089	-3.9935	6.51e-05	0.000536543
ALKBH5	5685.36	-0.396082	0.0992101	-3.99236	6.54e-05	0.000538645
SLC39A6	8886.37	0.37822	0.0947364	3.99233	6.54e-05	0.000538645
SLC25A33	811.539	-0.544684	0.13648	-3.99096	6.58e-05	0.000541511
FAM81B	122.477	-2.99851	0.751468	-3.9902	6.6e-05	0.00054298
DLX5	1387.46	1.09855	0.27537	3.98936	6.63e-05	0.000544614
NPR1	23.0002	1.31362	0.329306	3.98907	6.63e-05	0.000545024
MRPL15	1110.31	0.322924	0.0810051	3.98646	6.71e-05	0.00055076
IL17RC	186.04	-0.958764	0.240584	-3.98515	6.74e-05	0.000553248
MYD88	166.734	-0.770256	0.193277	-3.98524	6.74e-05	0.000553248
TCF7L2	618.601	-0.929824	0.233371	-3.98432	6.77e-05	0.000554907
RAX	8.64014	-3.1875	0.800052	-3.98411	6.77e-05	0.000555131
ROBO1	10846.5	0.769594	0.193175	3.98392	6.78e-05	0.000555296
ZNF154	1043.68	0.44775	0.112395	3.98371	6.78e-05	0.000555507
[truncated: 14,373 more rows]

## Sheet: Day 100 Dorsal
	baseMean	log2FoldChange	lfcSE	stat	pvalue	padj
PCDHGB4	1837.35	-3.00099	0.116703	-25.7148	7.99e-146	1.31e-141
LOC100288778	703.851	-1.35359	0.077349	-17.4998	1.44e-68	1.18e-64
CTSF	890.755	-6.27425	0.415504	-15.1003	1.61e-51	8.79e-48
OTUD7A	318.673	-1.08581	0.0751415	-14.4502	2.5e-47	1.02e-43
MAGEH1	3428.34	-1.01713	0.0716819	-14.1895	1.06e-45	3.48e-42
ZNF558	516.806	-6.60405	0.478992	-13.7874	3.04e-43	8.28e-40
ZXDA	344.152	-6.47769	0.500363	-12.946	2.48e-38	5.79e-35
TSPYL5	1264.89	-1.01405	0.0815839	-12.4296	1.81e-35	3.7e-32
PCDHGA8	83.8567	-2.88446	0.23651	-12.1959	3.27e-34	5.94e-31
ZNF835	239.323	-5.30822	0.437187	-12.1418	6.34e-34	1.04e-30
H3F3AP4	3761.41	1.07266	0.0982637	10.9161	9.65e-28	1.44e-24
GSTM1	161.182	1.8532	0.17472	10.6067	2.78e-26	3.79e-23
EIF2S3	6011.37	0.640608	0.061915	10.3466	4.34e-25	5.46e-22
ZNF248	659.838	-2.79776	0.282752	-9.89476	4.39e-23	5.13e-20
PEG3	1948.74	-7.61327	0.793899	-9.58971	8.83e-22	9.64e-19
POU3F4	392.818	-2.79452	0.292071	-9.56796	1.09e-21	1.12e-18
LINC00865	55.4185	2.1965	0.236739	9.27818	1.72e-20	1.66e-17
FLJ10038	795.059	0.833185	0.0899751	9.26017	2.04e-20	1.86e-17
MTMR10	304.671	-0.746764	0.0828682	-9.01147	2.03e-19	1.75e-16
PCDHGB7	1299.98	-2.14169	0.239219	-8.95284	3.46e-19	2.84e-16
FAR2P1	37.4012	-3.34042	0.379756	-8.79624	1.41e-18	1.1e-15
FAN1	931.786	-0.552109	0.0635521	-8.6875	3.7e-18	2.76e-15
HTR5A	148.801	-1.91457	0.22088	-8.66792	4.4e-18	3.13e-15
PARD6G	776.971	0.461592	0.0535239	8.62404	6.46e-18	4.41e-15
POTEF	35.82	-3.54207	0.411402	-8.60977	7.32e-18	4.8e-15
COL22A1	254.722	-6.53585	0.764135	-8.55327	1.2e-17	7.54e-15
TPTE2P1	94.0798	1.21983	0.144521	8.44052	3.16e-17	1.92e-14
SRGAP2D	475.368	-0.807037	0.0980817	-8.22821	1.9e-16	1.11e-13
PPAP2C	66.1578	-1.66117	0.202661	-8.19678	2.47e-16	1.39e-13
CROCCP2	513.878	0.72312	0.0885336	8.16774	3.14e-16	1.72e-13
ZFP28	962.715	-4.91347	0.603828	-8.1372	4.05e-16	2.14e-13
FAM66B	134.62	1.24148	0.152794	8.12518	4.47e-16	2.29e-13
BCYRN1	1007.2	-1.11885	0.13822	-8.09474	5.74e-16	2.85e-13
FNDC7	16.6439	-4.2599	0.531987	-8.00752	1.17e-15	5.64e-13
DHFR	1670.73	0.785387	0.0994345	7.89854	2.82e-15	1.32e-12
PMEL	212.936	-2.9272	0.374127	-7.82408	5.11e-15	2.33e-12
CENPE	565.445	1.10618	0.142328	7.77203	7.72e-15	3.42e-12
LOC403323	17.8162	-3.13817	0.405068	-7.74727	9.39e-15	4.05e-12
ZNF285	328.213	-3.53107	0.457056	-7.72568	1.11e-14	4.67e-12
ZFP36L2	1761.91	-0.75251	0.0990528	-7.59706	3.03e-14	1.24e-11
ZNF667	533.979	-4.88418	0.644597	-7.57712	3.53e-14	1.38e-11
PCDHGA10	962.366	1.3526	0.178487	7.57811	3.51e-14	1.38e-11
FAM135B	138.092	-6.51476	0.866613	-7.5175	5.58e-14	2.13e-11
FTH1	77339.3	-0.488763	0.0653641	-7.47754	7.57e-14	2.82e-11
ZNF471	363.478	-5.40261	0.727537	-7.42589	1.12e-13	4.08e-11
ZNF252P	752.185	-0.730441	0.0993873	-7.34944	1.99e-13	7.09e-11
NBPF20	126.394	1.14947	0.156764	7.33252	2.26e-13	7.4e-11
SLC17A8	557.533	-2.50403	0.341356	-7.33555	2.21e-13	7.4e-11
HSPA1A	599.987	-2.84004	0.387222	-7.3344	2.23e-13	7.4e-11
NAP1L6	9.02745	-6.08388	0.829496	-7.33442	2.23e-13	7.4e-11
SLC2A3	5465	-0.722552	0.0992172	-7.28253	3.28e-13	1.05e-10
ZNF667.AS1	755.457	-6.01773	0.830204	-7.24849	4.21e-13	1.33e-10
AGAP7P	19.7671	2.7653	0.38375	7.206	5.76e-13	1.78e-10
ZNF638	4658.12	0.336116	0.0475845	7.06355	1.62e-12	4.92e-10
LOC101928414	14.091	-3.85652	0.549568	-7.01738	2.26e-12	6.73e-10
UPF3B	1022.63	0.32745	0.04674	7.00579	2.46e-12	7.18e-10
FBXO17	405.085	0.864111	0.124062	6.96513	3.28e-12	9.11e-10
ZNF229	514.074	-5.70148	0.81826	-6.96781	3.22e-12	9.11e-10
ATP6V0E2	8237.22	-0.416273	0.0597585	-6.96593	3.26e-12	9.11e-10
MTMR9LP	132.771	0.860706	0.123934	6.94486	3.79e-12	1.02e-09
TMEM9	5959.16	-0.450349	0.0648539	-6.94406	3.81e-12	1.02e-09
TCEAL6	122.828	-2.39405	0.346387	-6.91149	4.8e-12	1.27e-09
UBE3B	1617.84	0.379634	0.0557566	6.80877	9.84e-12	2.56e-09
RET	449.978	-1.94864	0.287597	-6.77557	1.24e-11	3.17e-09
KTN1	4824.13	0.340094	0.0502734	6.76489	1.33e-11	3.36e-09
SMIM10L1	734.15	0.389184	0.057646	6.75127	1.47e-11	3.64e-09
PCDHB5	952.525	-3.18876	0.47262	-6.74698	1.51e-11	3.69e-09
ZNF37BP	750.354	0.884657	0.131193	6.74319	1.55e-11	3.73e-09
ZNF736	337.521	-5.81799	0.863416	-6.73834	1.6e-11	3.8e-09
PCDHGA7	267.351	-5.30134	0.789526	-6.71458	1.89e-11	4.41e-09
TKTL1	612.827	-1.12363	0.167687	-6.70075	2.07e-11	4.78e-09
NINL	1309.81	0.661984	0.0990965	6.68019	2.39e-11	5.41e-09
TF	180.604	-0.921515	0.138022	-6.67657	2.45e-11	5.41e-09
SPATA18	307.651	0.869596	0.130218	6.67802	2.42e-11	5.41e-09
NNAT	36468.6	-3.31891	0.498925	-6.65212	2.89e-11	6.31e-09
ZNF585B	507.239	0.68125	0.102864	6.62285	3.52e-11	7.59e-09
TMEM131	3696.12	0.376075	0.0568227	6.6184	3.63e-11	7.72e-09
IRAK1	815.112	-1.21918	0.185011	-6.58977	4.41e-11	9.25e-09
MED17	1555.99	0.443188	0.0674118	6.57434	4.89e-11	1.01e-08
RP9P	457.944	0.366027	0.0557361	6.56715	5.13e-11	1.05e-08
PHEX	145.147	-2.22494	0.33957	-6.55223	5.67e-11	1.15e-08
TXNRD2	203.046	-3.51491	0.537453	-6.53994	6.15e-11	1.23e-08
FUT4	147.774	0.808957	0.124183	6.51422	7.31e-11	1.44e-08
CA12	5076.93	-0.816815	0.126137	-6.47562	9.44e-11	1.84e-08
FHL5	70.0365	-4.09726	0.632932	-6.47345	9.58e-11	1.85e-08
DDX11L2	51.2242	3.6982	0.572799	6.45636	1.07e-10	2.04e-08
PAK3	3151.63	0.636318	0.0988409	6.4378	1.21e-10	2.28e-08
ERV3.1	263.722	-1.61889	0.251629	-6.43363	1.25e-10	2.32e-08
ARID4A	2244.8	0.381949	0.0594943	6.41994	1.36e-10	2.51e-08
SHROOM3	1546.99	0.423929	0.0666603	6.35954	2.02e-10	3.68e-08
UPF3A	1867.49	0.593942	0.0934242	6.35747	2.05e-10	3.69e-08
GOLGA6L9	322.741	1.26214	0.198786	6.34924	2.16e-10	3.81e-08
PCNT	1575.08	0.721009	0.113556	6.34935	2.16e-10	3.81e-08
DPP7	1865.59	-0.620393	0.0978982	-6.33712	2.34e-10	4.08e-08
FBF1	353.425	0.677929	0.107052	6.3327	2.41e-10	4.15e-08
ELMOD2	1800.37	0.304759	0.0481603	6.32802	2.48e-10	4.24e-08
MBTD1	2008.28	0.45788	0.0729711	6.27481	3.5e-10	5.85e-08
EMC3.AS1	118.262	0.891384	0.142048	6.27524	3.49e-10	5.85e-08
EXOSC6	970.302	0.297095	0.0473759	6.27101	3.59e-10	5.93e-08
CUL4A	2163.79	0.290758	0.0464125	6.26464	3.74e-10	6.12e-08
C11orf74	633.892	0.605109	0.0971879	6.22618	4.78e-10	7.75e-08
CHRNA7	185.217	-0.929466	0.149922	-6.19967	5.66e-10	9.08e-08
EHMT1	3723	0.287161	0.0463406	6.19674	5.76e-10	9.16e-08
NBPF9	493.292	0.915766	0.148448	6.16892	6.88e-10	1.08e-07
CAB39L	1780.34	0.255727	0.0415065	6.16113	7.22e-10	1.13e-07
PCF11	1937.24	0.268797	0.0436955	6.1516	7.67e-10	1.18e-07
ANKRD30BL	14.8925	-3.50716	0.570945	-6.14272	8.11e-10	1.24e-07
MOCS1	381.86	-0.47178	0.0772635	-6.10612	1.02e-09	1.55e-07
HCG18	1393.8	0.5667	0.0928788	6.1015	1.05e-09	1.58e-07
TBC1D16	11570.7	0.270199	0.0444492	6.07882	1.21e-09	1.8e-07
IGF1	453.851	-1.32935	0.219093	-6.06753	1.3e-09	1.92e-07
KIAA1586	1097.52	0.479221	0.0790731	6.06047	1.36e-09	1.98e-07
CEP290	1109.09	0.651448	0.107573	6.05587	1.4e-09	2.02e-07
ZNF577	204.822	0.929241	0.153614	6.04919	1.46e-09	2.09e-07
MGC70870	21.6604	-4.38502	0.726219	-6.03815	1.56e-09	2.22e-07
NDUFA4	4721.74	-0.295171	0.0489452	-6.03065	1.63e-09	2.31e-07
FAM208A	3648.52	0.332252	0.0551758	6.0217	1.73e-09	2.42e-07
SLTM	2637.23	0.467982	0.0778199	6.01365	1.81e-09	2.5e-07
HSPA4L	2929.31	-0.327128	0.0543925	-6.01421	1.81e-09	2.5e-07
COMT	742.473	-2.90425	0.483326	-6.00888	1.87e-09	2.55e-07
CECR7	13.6393	-5.28672	0.882424	-5.99114	2.08e-09	2.82e-07
LDOC1	2774.01	-5.94154	1.0002	-5.94038	2.84e-09	3.82e-07
DBH	123.305	-3.02656	0.510201	-5.9321	2.99e-09	3.98e-07
PNP	447.739	-0.715183	0.121175	-5.90205	3.59e-09	4.74e-07
DSCAML1	1607.33	0.761837	0.129281	5.89289	3.79e-09	4.95e-07
HTR5A.AS1	46.6066	-1.99957	0.339346	-5.89242	3.81e-09	4.95e-07
DDX50	1619.2	0.18958	0.0323642	5.85773	4.69e-09	6e-07
NCEH1	359.023	-0.791042	0.135013	-5.85901	4.66e-09	6e-07
IPW	323.609	0.580062	0.0991676	5.84931	4.94e-09	6.27e-07
WDR60	501.636	0.644299	0.110594	5.82581	5.68e-09	7.16e-07
NOS2	95.9721	0.887846	0.152817	5.80988	6.25e-09	7.81e-07
RAB11FIP3	3195.75	0.294076	0.0507859	5.79051	7.02e-09	8.71e-07
EPAS1	537.72	-0.950101	0.164216	-5.78569	7.22e-09	8.89e-07
PSMA3.AS1	529.223	0.476227	0.0823743	5.78126	7.41e-09	9.06e-07
ALDOC	5069.29	-0.773482	0.134097	-5.76807	8.02e-09	9.73e-07
TIPARP	1325.24	-0.535107	0.0927913	-5.76678	8.08e-09	9.73e-07
SNX1	2174.3	0.266461	0.0462932	5.75593	8.62e-09	1.03e-06
EDNRB	10416.7	-1.90958	0.33367	-5.72295	1.05e-08	1.24e-06
ETNPPL	72.7226	-1.84285	0.322667	-5.7113	1.12e-08	1.32e-06
HOOK3	2429.31	0.447236	0.0784895	5.69804	1.21e-08	1.42e-06
ZNF286B	569.389	0.690302	0.121473	5.68276	1.33e-08	1.54e-06
ZCCHC11	2088.6	0.393761	0.0693243	5.67998	1.35e-08	1.55e-06
ZNF728	27.9927	-5.3115	0.935696	-5.67652	1.37e-08	1.57e-06
DLK1	2403.87	-0.918235	0.161893	-5.67185	1.41e-08	1.61e-06
NRK	95.5286	-2.98791	0.528065	-5.65822	1.53e-08	1.73e-06
VPS11	1735.83	-0.304592	0.0538651	-5.65472	1.56e-08	1.75e-06
CPM	77.5655	-1.32609	0.234824	-5.64715	1.63e-08	1.82e-06
THOC1	350.818	0.570205	0.101033	5.64373	1.66e-08	1.84e-06
SDHAP1	237.304	1.08235	0.191812	5.64276	1.67e-08	1.84e-06
KCTD16	690.548	-0.739563	0.13113	-5.63995	1.7e-08	1.86e-06
ANKRD26	618.47	0.400911	0.0712805	5.62442	1.86e-08	2.02e-06
LOC284798	24.1836	-2.07824	0.370519	-5.60899	2.04e-08	2.19e-06
CBLN2	676.806	0.913939	0.163273	5.5976	2.17e-08	2.33e-06
GBE1	925.172	-0.738469	0.131978	-5.59541	2.2e-08	2.34e-06
GALNT1	3994.42	0.504263	0.0902514	5.58731	2.31e-08	2.44e-06
SDHAP2	175.217	0.953857	0.170827	5.58377	2.35e-08	2.47e-06
MED15P9	6.95253	-5.0675	0.909244	-5.57332	2.5e-08	2.61e-06
ATXN7L1	683.697	0.359979	0.0647767	5.55723	2.74e-08	2.84e-06
KLF13	3207.37	-0.594624	0.107651	-5.52362	3.32e-08	3.42e-06
PCOLCE2	117.543	-1.12085	0.202999	-5.52147	3.36e-08	3.44e-06
MFN1	1022.89	0.345023	0.0625309	5.51765	3.44e-08	3.49e-06
LOC642361	212.99	2.62015	0.475962	5.50496	3.69e-08	3.73e-06
CHP1	3272.32	-0.288368	0.0523995	-5.50326	3.73e-08	3.75e-06
TFAP2B	1724.64	-6.20064	1.12807	-5.4967	3.87e-08	3.86e-06
DANCR	658.438	0.576437	0.104904	5.49492	3.91e-08	3.88e-06
SLC25A33	855.385	-0.543428	0.0989603	-5.49137	3.99e-08	3.93e-06
FOLH1	18.1963	-5.43663	0.990422	-5.48921	4.04e-08	3.96e-06
SRD5A3	360.118	0.566338	0.103344	5.48011	4.25e-08	4.12e-06
COLEC10	43.3441	-2.26575	0.413414	-5.48058	4.24e-08	4.12e-06
FLJ23867	180.406	0.604343	0.110368	5.47569	4.36e-08	4.2e-06
PBX2	1613.53	0.451749	0.0825154	5.47472	4.38e-08	4.2e-06
MIEF1	3912.59	-0.258971	0.0473371	-5.47079	4.48e-08	4.27e-06
AARS	12771.4	-0.312367	0.0571544	-5.46533	4.62e-08	4.37e-06
CCDC102B	349.484	-1.25219	0.229237	-5.46241	4.7e-08	4.42e-06
RBM6	2422.62	0.458508	0.0841011	5.45187	4.98e-08	4.66e-06
C12orf75	911.62	-0.708672	0.130013	-5.45078	5.02e-08	4.67e-06
CNGA3	396.329	1.10262	0.20267	5.44048	5.31e-08	4.92e-06
FGL2	87.7378	-3.02468	0.556168	-5.43843	5.38e-08	4.94e-06
U2SURP	4338.53	0.361318	0.0664642	5.43627	5.44e-08	4.98e-06
FAM167B	52.5285	1.2836	0.236625	5.42463	5.81e-08	5.28e-06
SLC16A10	221.443	-0.858322	0.158551	-5.41353	6.18e-08	5.59e-06
MT3	764.668	-0.80273	0.148444	-5.40763	6.39e-08	5.75e-06
ME1	176.983	-0.7375	0.136489	-5.40335	6.54e-08	5.85e-06
HERC4	1126.45	0.221062	0.040988	5.39333	6.92e-08	6.12e-06
PPM1F	1142.91	0.252681	0.0468495	5.39345	6.91e-08	6.12e-06
PAOX	210.88	0.511589	0.0949891	5.38577	7.21e-08	6.35e-06
KRBA2	215.53	0.632852	0.117725	5.37568	7.63e-08	6.68e-06
FLJ37035	10.4928	1.93674	0.360434	5.37334	7.73e-08	6.73e-06
MNS1	168.941	-0.757621	0.141021	-5.37238	7.77e-08	6.73e-06
ARL2	488.621	-0.473297	0.0881867	-5.36698	8.01e-08	6.9e-06
LRRTM3	1190.99	0.754585	0.141028	5.3506	8.77e-08	7.52e-06
HIVEP3	1075.98	0.484111	0.0905846	5.3443	9.08e-08	7.74e-06
SPHK1	163.945	0.745721	0.139961	5.32807	9.93e-08	8.42e-06
HEXDC	344.783	0.58257	0.109456	5.3224	1.02e-07	8.64e-06
LGI3	272.037	-1.47976	0.27815	-5.32	1.04e-07	8.71e-06
BPTF	5261.35	0.489614	0.0921252	5.31466	1.07e-07	8.93e-06
MYO1C	715.238	0.318894	0.0600742	5.30833	1.11e-07	9.2e-06
CROCCP3	115.426	1.3453	0.254094	5.2945	1.19e-07	9.87e-06
FAM57A	926.799	-0.217404	0.0411004	-5.28958	1.23e-07	1.01e-05
WASH1	317.143	0.538209	0.10202	5.27555	1.32e-07	1.08e-05
CHRDL1	8101.04	0.82739	0.157085	5.26715	1.39e-07	1.13e-05
FUCA1	1012.14	-0.319546	0.0606815	-5.26596	1.39e-07	1.13e-05
SIRT3	1277.13	-0.237918	0.0452371	-5.25935	1.45e-07	1.17e-05
COPRS	1172.67	-0.396863	0.0754962	-5.25673	1.47e-07	1.18e-05
PCDHA4	1714.21	-0.619134	0.117927	-5.25017	1.52e-07	1.21e-05
PCDHB4	125.012	0.852754	0.162609	5.2442	1.57e-07	1.25e-05
SCN4B	1419.41	-0.96832	0.184827	-5.23906	1.61e-07	1.28e-05
RFX5	1108.38	0.428248	0.0817569	5.23807	1.62e-07	1.28e-05
SRSF5	3230.85	0.513934	0.0982119	5.23292	1.67e-07	1.31e-05
MGC27345	213.164	0.521204	0.099685	5.22851	1.71e-07	1.33e-05
PM20D2	1018.09	0.29159	0.0557994	5.22569	1.74e-07	1.35e-05
CEP19	636.778	0.354137	0.0678311	5.22086	1.78e-07	1.38e-05
RIOK3	2945.1	-0.332093	0.0637183	-5.21189	1.87e-07	1.44e-05
PAX2	1230.5	-4.17055	0.801543	-5.20316	1.96e-07	1.49e-05
KIAA0753	795.296	0.591751	0.113735	5.20287	1.96e-07	1.49e-05
FHL1	8046.03	-0.279847	0.0537733	-5.2042	1.95e-07	1.49e-05
ZFP3	240.564	-0.835994	0.160882	-5.19633	2.03e-07	1.53e-05
LRRC61	96.6425	-3.44395	0.663301	-5.19214	2.08e-07	1.56e-05
DUSP5P1	183.65	1.35259	0.260652	5.18928	2.11e-07	1.57e-05
LOC439994	381.689	0.455369	0.0877491	5.18944	2.11e-07	1.57e-05
OR2L13	45.6958	-1.84676	0.356505	-5.18018	2.22e-07	1.64e-05
ZNF737	1658.55	0.320759	0.061916	5.18055	2.21e-07	1.64e-05
TRPV3	26.7054	1.10685	0.213865	5.17547	2.27e-07	1.67e-05
DSC1	23.8595	1.83799	0.355696	5.16729	2.38e-07	1.74e-05
PRIMPOL	311.671	0.350669	0.0679044	5.16415	2.42e-07	1.76e-05
PI15	3706.1	-4.08243	0.791528	-5.15766	2.5e-07	1.81e-05
PAPPA2	409.024	-0.81616	0.158298	-5.15584	2.52e-07	1.82e-05
UBA5	2059.18	0.244705	0.047511	5.15049	2.6e-07	1.87e-05
TRIM24	5061.6	0.191607	0.0372924	5.13795	2.78e-07	1.99e-05
PCDHGA3	686.401	-5.17394	1.00915	-5.12704	2.94e-07	2.1e-05
CCDC149	713.937	0.323708	0.0632171	5.12057	3.05e-07	2.16e-05
ZNF718	524.337	0.569132	0.111468	5.1058	3.29e-07	2.32e-05
FBLN7	288.914	-0.673031	0.131842	-5.10484	3.31e-07	2.33e-05
VHL	3154.07	0.593753	0.117052	5.07256	3.93e-07	2.75e-05
KCTD8	376.776	-2.17595	0.429455	-5.06678	4.05e-07	2.82e-05
ZNF557	369.55	0.572485	0.113069	5.06315	4.12e-07	2.86e-05
WAC	5490.9	0.191952	0.0380402	5.04602	4.51e-07	3.07e-05
CIB2	872.144	-0.45252	0.0896689	-5.04656	4.5e-07	3.07e-05
PIGZ	143.442	0.82453	0.163332	5.04819	4.46e-07	3.07e-05
DCAF16	1789.89	0.545589	0.108136	5.04538	4.53e-07	3.07e-05
NFKBIE	657.232	-0.255753	0.0506924	-5.04519	4.53e-07	3.07e-05
SHH	125.003	-2.58147	0.511618	-5.04571	4.52e-07	3.07e-05
HSPA1L	144.809	-1.81952	0.360834	-5.04254	4.59e-07	3.1e-05
GLUD1	12281	-0.549085	0.108954	-5.03961	4.66e-07	3.13e-05
TFAP2A	2622.68	-4.06555	0.80702	-5.03774	4.71e-07	3.15e-05
ARAF	846.835	-0.394918	0.0784537	-5.03378	4.81e-07	3.2e-05
MED18	394.345	0.626689	0.124671	5.02674	4.99e-07	3.31e-05
NSF	4172.01	-0.36034	0.0717301	-5.02355	5.07e-07	3.34e-05
GABRE	94.5129	-2.40674	0.479107	-5.02339	5.08e-07	3.34e-05
IPO5P1	802.47	0.316222	0.0630585	5.01474	5.31e-07	3.48e-05
TGFBI	518.497	-1.36261	0.271762	-5.014	5.33e-07	3.48e-05
SCARA5	9.45613	-3.02904	0.605437	-5.00305	5.64e-07	3.67e-05
KIAA1551	1400.71	0.549666	0.109953	4.99909	5.76e-07	3.73e-05
SENP6	2692.95	0.271934	0.0544482	4.99437	5.9e-07	3.81e-05
PIBF1	759.077	0.357955	0.0717137	4.99144	5.99e-07	3.83e-05
VPS18	2497.96	-0.309217	0.0619458	-4.99174	5.98e-07	3.83e-05
ZNF528.AS1	114.869	-2.27126	0.455137	-4.99029	6.03e-07	3.84e-05
MCM8	288.087	0.455013	0.0911907	4.98968	6.05e-07	3.84e-05
GAD2	1849.73	-4.9524	0.992717	-4.98873	6.08e-07	3.84e-05
GAD1	8238.32	-4.04804	0.811909	-4.98583	6.17e-07	3.89e-05
DNAJC3.AS1	289.466	0.345399	0.0693145	4.98307	6.26e-07	3.93e-05
BEND3P3	551.107	3.96116	0.795308	4.98066	6.34e-07	3.96e-05
POLR2J2	11.6095	2.43374	0.489012	4.97684	6.46e-07	4.02e-05
SLITRK4	970.617	-3.99592	0.803001	-4.97624	6.48e-07	4.02e-05
TNMD	231.04	-3.93351	0.790599	-4.97536	6.51e-07	4.02e-05
PCDHB15	1001.22	-0.505166	0.101621	-4.97108	6.66e-07	4.1e-05
LIMD2	897.108	0.423221	0.085173	4.96896	6.73e-07	4.13e-05
COG4	3053.02	-0.240608	0.0484808	-4.96296	6.94e-07	4.24e-05
PAPOLA	7830.93	0.202732	0.0408591	4.96173	6.99e-07	4.25e-05
LINC01515	14.6627	-2.79012	0.562445	-4.9607	7.02e-07	4.26e-05
ROCK2	2550.66	0.520182	0.104891	4.95927	7.08e-07	4.28e-05
HPGD	121.961	-1.19916	0.241879	-4.95767	7.13e-07	4.29e-05
SLK	3127.73	0.25772	0.052015	4.95472	7.24e-07	4.34e-05
APMAP	5059.44	-0.347198	0.0701084	-4.95231	7.33e-07	4.38e-05
LZTR1	1592.37	0.30886	0.0623941	4.95015	7.42e-07	4.42e-05
MAST4	1082.08	-0.699445	0.141326	-4.94917	7.45e-07	4.42e-05
DCAF11	3835.5	-0.132231	0.0267449	-4.94415	7.65e-07	4.52e-05
EN2	1309.36	-3.65028	0.738598	-4.94218	7.73e-07	4.55e-05
TP73.AS1	1105.27	0.337785	0.0683795	4.93986	7.82e-07	4.59e-05
WDR74	1117.92	-0.411198	0.0834511	-4.92741	8.33e-07	4.87e-05
SKOR2	1369.44	-5.97662	1.21312	-4.92663	8.37e-07	4.88e-05
NDUFS8	1823.95	-0.218399	0.0443381	-4.92577	8.4e-07	4.88e-05
CELF1	4620.73	0.458868	0.0932309	4.92184	8.57e-07	4.96e-05
PIK3R4	1342.71	-0.264095	0.05367	-4.92071	8.62e-07	4.97e-05
PVRL1	7231.06	-0.412797	0.084088	-4.90911	9.15e-07	5.24e-05
PCMTD2	3143.06	0.414596	0.0844453	4.90964	9.12e-07	5.24e-05
WFIKKN2	1402.81	-1.48226	0.302188	-4.90511	9.34e-07	5.33e-05
HES5	509.101	-1.33225	0.271704	-4.9033	9.42e-07	5.36e-05
B3GALNT2	436.977	0.451394	0.0921736	4.89721	9.72e-07	5.51e-05
LINC00669	42.1719	2.02069	0.412688	4.8964	9.76e-07	5.51e-05
POMGNT2	2374.83	-0.342495	0.0699583	-4.89571	9.8e-07	5.51e-05
KLHDC4	642.253	0.441425	0.0903667	4.88482	1.04e-06	5.81e-05
FAM86FP	31.8368	1.23949	0.254049	4.87894	1.07e-06	5.96e-05
ATRX	8866.26	0.323407	0.0663467	4.8745	1.09e-06	6.08e-05
NCK1.AS1	75.8371	0.888796	0.182561	4.86849	1.12e-06	6.24e-05
OBSCN	3559.67	0.668761	0.137405	4.86707	1.13e-06	6.24e-05
NUTM2B	74.5311	2.41101	0.495324	4.86754	1.13e-06	6.24e-05
TOLLIP	3136.07	-0.355531	0.0730636	-4.86604	1.14e-06	6.26e-05
DDX17	11105.3	0.404997	0.0832766	4.86327	1.15e-06	6.32e-05
CPLX4	373.136	-5.42397	1.11557	-4.86207	1.16e-06	6.34e-05
PHRF1	2731.49	0.222487	0.0457951	4.85832	1.18e-06	6.42e-05
FAM198A	75.8268	-1.50467	0.309676	-4.85885	1.18e-06	6.42e-05
CCDC93	1869.58	0.341773	0.0703906	4.85538	1.2e-06	6.49e-05
CDR1	2527.61	0.507082	0.104455	4.85457	1.21e-06	6.5e-05
SCNN1B	83.8491	-1.26034	0.259758	-4.85198	1.22e-06	6.56e-05
GTF2H1	951.825	0.320396	0.0660601	4.85007	1.23e-06	6.6e-05
AADAT	614.421	0.301595	0.0622219	4.84708	1.25e-06	6.68e-05
KIAA1147	2683.43	0.519783	0.107342	4.8423	1.28e-06	6.82e-05
SCRN2	734.033	0.347878	0.0718605	4.84102	1.29e-06	6.85e-05
ZNF738	1502.86	0.379731	0.0785044	4.83707	1.32e-06	6.96e-05
TNFSF9	156.701	-0.595131	0.123063	-4.83599	1.32e-06	6.98e-05
WIF1	332.118	-2.18114	0.451219	-4.83388	1.34e-06	7.03e-05
CNTRL	541.018	0.887696	0.184058	4.82291	1.41e-06	7.4e-05
WAC.AS1	1310.73	0.38679	0.0802738	4.81838	1.45e-06	7.55e-05
PLEKHB2	9658.34	-0.267119	0.0554833	-4.8144	1.48e-06	7.68e-05
MEGF11	437.927	-1.40599	0.29225	-4.81092	1.5e-06	7.79e-05
ZSCAN29	1270.2	0.338997	0.0705742	4.80342	1.56e-06	8.03e-05
PAX8.AS1	22.8696	-4.61583	0.960831	-4.804	1.56e-06	8.03e-05
ANKRD36BP1	123.619	0.568916	0.118523	4.80005	1.59e-06	8.14e-05
CETN4P	33.3601	-0.815305	0.1699	-4.79872	1.6e-06	8.16e-05
TMEM2	1622.06	0.725181	0.15113	4.7984	1.6e-06	8.16e-05
FAM101B	366.149	-0.853052	0.177823	-4.7972	1.61e-06	8.17e-05
CHCHD2	3617.5	-2.92603	0.609999	-4.79678	1.61e-06	8.17e-05
LOC100130950	22.2108	1.39839	0.291967	4.78956	1.67e-06	8.45e-05
FAM172A	2122.44	0.228575	0.0477663	4.78528	1.71e-06	8.6e-05
APOLD1	445.945	-0.542049	0.113497	-4.77587	1.79e-06	8.96e-05
FAM199X	5235.26	0.180291	0.0377461	4.77641	1.78e-06	8.96e-05
EFHD1	647.883	-0.510964	0.107032	-4.77395	1.81e-06	9.02e-05
SMCHD1	4684.87	0.209185	0.0438448	4.77103	1.83e-06	9.12e-05
AMPH	4002.23	-0.606769	0.127192	-4.7705	1.84e-06	9.12e-05
CHPT1	804.533	-0.293487	0.0615316	-4.7697	1.85e-06	9.13e-05
ZNF267	267.105	-0.694442	0.145689	-4.76662	1.87e-06	9.24e-05
RAB2B	1724.19	0.309604	0.0649785	4.76471	1.89e-06	9.3e-05
CNTN6	168.73	-3.93759	0.827749	-4.75699	1.97e-06	9.63e-05
FAR1	2384.64	0.293317	0.0616779	4.75562	1.98e-06	9.64e-05
FBXO11	6039.6	0.265332	0.0557917	4.75576	1.98e-06	9.64e-05
IRX1	1331.44	-2.77362	0.583405	-4.7542	1.99e-06	9.68e-05
MEIOB	13.5547	-1.64041	0.345111	-4.75327	2e-06	9.7e-05
MTR	1184.33	0.641212	0.134974	4.75064	2.03e-06	9.79e-05
GTF2I	2315.2	0.277035	0.0583313	4.74933	2.04e-06	9.83e-05
LINC00884	36.2862	-1.24931	0.263261	-4.74552	2.08e-06	9.99e-05
PNPLA6	2885.03	-0.205034	0.0432375	-4.74204	2.12e-06	0.000101004
ASAP2	2404.87	0.331722	0.0699521	4.74213	2.11e-06	0.000101004
RALGAPA2	2078.32	0.598639	0.126272	4.74087	2.13e-06	0.000101004
EIF2A	3751.57	0.281805	0.0594359	4.74133	2.12e-06	0.000101004
VEZT	4121.63	0.205859	0.0434336	4.73964	2.14e-06	0.000101328
ALG3	606.911	-0.275537	0.058147	-4.73863	2.15e-06	0.000101538
AMOT	2450.62	0.43541	0.0919039	4.73767	2.16e-06	0.000101729
ADSSL1	323.685	-0.840285	0.177411	-4.73637	2.18e-06	0.000102087
CYTH1	1666.79	0.498478	0.105261	4.73563	2.18e-06	0.000102167
ZNF717	170.869	0.398963	0.0842669	4.73452	2.2e-06	0.000102436
CLEC19A	8.4854	-3.32801	0.703132	-4.73312	2.21e-06	0.000102853
PBLD	308.069	-0.469738	0.0993439	-4.7284	2.26e-06	0.000104382
NUTM2B.AS1	194.058	2.92849	0.619211	4.72939	2.25e-06	0.000104382
UBLCP1	1596.77	0.510664	0.107987	4.72893	2.26e-06	0.000104382
HAP1	257.648	-0.967706	0.204726	-4.72683	2.28e-06	0.00010464
FANCL	317.558	0.724329	0.15324	4.72676	2.28e-06	0.00010464
GRIPAP1	2481.22	0.233857	0.0494896	4.72537	2.3e-06	0.000105061
IRX2	760.417	-3.43908	0.728173	-4.72289	2.33e-06	0.000106058
TH	151.394	-2.96395	0.627706	-4.72187	2.34e-06	0.000106293
SLC35A2	703.315	-0.352984	0.0747702	-4.72092	2.35e-06	0.000106499
CEP78	731.231	0.264216	0.0560923	4.71038	2.47e-06	0.000111847
FLJ37201	68.0094	0.667787	0.141829	4.70838	2.5e-06	0.000112601
KRT19	50.9732	1.0797	0.229338	4.70788	2.5e-06	0.000112601
SYCE1	8.612	-3.16438	0.672265	-4.70704	2.51e-06	0.000112759
ARID5B	1536.88	-0.491644	0.104515	-4.70406	2.55e-06	0.000114108
ARID4B	2770	0.240837	0.051228	4.70127	2.59e-06	0.0001146
CNTROB	1769.95	0.256585	0.0545761	4.70142	2.58e-06	0.0001146
NUB1	1836.56	0.161658	0.0343817	4.70186	2.58e-06	0.0001146
SYN1	5577.76	-0.422375	0.0898488	-4.70096	2.59e-06	0.0001146
SLC6A2	192.361	-4.63572	0.986262	-4.70029	2.6e-06	0.000114666
CA8	3893.71	-3.50566	0.746028	-4.69911	2.61e-06	0.000115023
PPP2R3B	847.475	0.383544	0.0816402	4.69798	2.63e-06	0.00011535
OPRM1	225.685	-3.57098	0.760345	-4.69652	2.65e-06	0.000115864
SPATA20	1201.72	-0.378062	0.0805147	-4.69556	2.66e-06	0.000116099
MRE11A	408.126	0.384698	0.0820867	4.68648	2.78e-06	0.000121045
VGLL3	1086.94	-3.36678	0.719292	-4.68069	2.86e-06	0.000124184
CDK11A	549.122	0.560189	0.119697	4.68008	2.87e-06	0.000124228
CIRH1A	1763.03	0.275791	0.0589743	4.67646	2.92e-06	0.000126107
CLCC1	1639.15	0.241766	0.0517161	4.67487	2.94e-06	0.000126752
LTN1	2177.69	0.506135	0.108311	4.67299	2.97e-06	0.000127578
DHRS3	624.058	-1.38531	0.296736	-4.66849	3.03e-06	0.000128386
CRABP1	4682.56	-1.01882	0.218181	-4.66963	3.02e-06	0.000128386
PROKR1	103.34	-2.60165	0.557113	-4.66987	3.01e-06	0.000128386
C6orf1	1261.94	-0.428683	0.0917943	-4.67004	3.01e-06	0.000128386
NPY	422.674	1.63231	0.349607	4.66898	3.03e-06	0.000128386
AK3	1914.89	0.219646	0.0470463	4.66873	3.03e-06	0.000128386
NBPF11	406.151	0.435253	0.0932876	4.66571	3.08e-06	0.000129801
TCEAL7	1574.22	-0.544719	0.116785	-4.6643	3.1e-06	0.000130355
PDE1B	1199.9	-2.03504	0.436375	-4.6635	3.11e-06	0.000130526
ZNF273	433.136	-0.526262	0.112988	-4.65767	3.2e-06	0.000133935
EPHA8	917.377	-1.24596	0.267603	-4.65598	3.22e-06	0.000134695
PTGER3	2062.29	-3.14698	0.676145	-4.6543	3.25e-06	0.000135451
ATAD5	231.307	0.703401	0.151206	4.65195	3.29e-06	0.00013606
MAF1	3109.94	0.534196	0.114836	4.65181	3.29e-06	0.00013606
RABL6	4530.08	0.225257	0.0484158	4.65255	3.28e-06	0.00013606
LARP7	1526.55	0.232275	0.0499621	4.64902	3.34e-06	0.000137568
FBXO27	312.986	-0.639484	0.137629	-4.64642	3.38e-06	0.00013896
YARS	7335.85	-0.285572	0.0615015	-4.64333	3.43e-06	0.000140349
EBF2	633.552	-2.83503	0.610506	-4.64374	3.42e-06	0.000140349
RTF1	5665.31	0.245196	0.0528202	4.64208	3.45e-06	0.000140849
CSPP1	734.208	0.469123	0.101108	4.63981	3.49e-06	0.000142053
LOC390705	14.7927	-4.2871	0.924989	-4.63476	3.57e-06	0.000144842
IGF2BP3	1254.07	0.296252	0.0639142	4.63516	3.57e-06	0.000144842
CILP2	792.638	0.626873	0.135343	4.63173	3.63e-06	0.000146613
LINC00662	361.295	0.5692	0.122976	4.62853	3.68e-06	0.000148533
DNAL1	1392.27	0.271283	0.0586333	4.62677	3.71e-06	0.000149063
DENND4C	2109.5	0.36685	0.0792838	4.62705	3.71e-06	0.000149063
RSRC2	2891.34	0.195235	0.0422143	4.62485	3.75e-06	0.000150086
HAS1	199.77	-1.30955	0.283302	-4.62247	3.79e-06	0.00015145
TSHR	152.654	-1.01914	0.220531	-4.62133	3.81e-06	0.000151768
GPAA1	3834.91	-0.24134	0.0522265	-4.62102	3.82e-06	0.000151768
SCRN3	1336.09	0.217456	0.0470733	4.61953	3.85e-06	0.000152496
CLTC	29825.8	-0.233941	0.0506763	-4.61638	3.9e-06	0.000154451
ATXN3	677.869	0.313152	0.067876	4.61359	3.96e-06	0.000155985
ZNF562	1067.59	-0.31675	0.0686599	-4.61333	3.96e-06	0.000155985
ZNF124	308.54	0.454894	0.0986347	4.61191	3.99e-06	0.000156677
SLC32A1	2031.48	-3.89205	0.844719	-4.60752	4.08e-06	0.00015964
TNS1	742.614	-0.344833	0.0748909	-4.60447	4.14e-06	0.000161607
CCNDBP1	481.516	0.336742	0.0731653	4.60248	4.17e-06	0.000162775
AQP1	2575.82	-1.72405	0.374747	-4.60057	4.21e-06	0.000163882
F7	40.1004	1.1899	0.258732	4.59896	4.25e-06	0.00016437
REPS1	2680.28	0.291769	0.0634366	4.59938	4.24e-06	0.00016437
ASIC2	650.601	-1.88861	0.410914	-4.59613	4.3e-06	0.000166229
ITPRIPL1	98.1363	0.75743	0.164833	4.59513	4.32e-06	0.000166633
TRA2A	1854.6	0.299323	0.0652104	4.59012	4.43e-06	0.000170284
PDS5A	5144.67	0.371864	0.0810307	4.58917	4.45e-06	0.000170655
NUP88	1049.91	0.392204	0.0855393	4.58507	4.54e-06	0.000173634
KLK10	92.8594	-2.00129	0.437304	-4.57642	4.73e-06	0.000179803
ZNF70	257.083	0.626789	0.136943	4.57701	4.72e-06	0.000179803
RRAGD	4926.31	-0.320837	0.0701082	-4.57631	4.73e-06	0.000179803
DNAJC13	1757.63	0.322344	0.0704996	4.57228	4.82e-06	0.000182869
LCP1	22.39	-1.71238	0.374562	-4.57169	4.84e-06	0.000182966
GPR161	5556.35	0.276155	0.0604373	4.56929	4.89e-06	0.000184646
STARD9	423.118	0.751806	0.164616	4.56702	4.95e-06	0.000185463
PCAT7	74.4781	-1.06561	0.233332	-4.56692	4.95e-06	0.000185463
SLITRK2	1508.78	-4.29722	0.940901	-4.56713	4.94e-06	0.000185463
FBN3	937.9	0.860598	0.188592	4.56328	5.04e-06	0.000188279
LHX1	3058.9	-2.98974	0.655533	-4.56078	5.1e-06	0.000190101
CYP1B1	147.424	-1.30538	0.286345	-4.55876	5.15e-06	0.000191498
LHX5	554.092	-1.8544	0.407207	-4.55395	5.26e-06	0.000195491
SKOR1	1116.17	-2.04373	0.449006	-4.55168	5.32e-06	0.00019716
PCDHGA11	215.032	-1.64896	0.362352	-4.55072	5.35e-06	0.000197174
FOXP2	4003.1	-2.93564	0.645095	-4.55072	5.35e-06	0.000197174
PCDHA6	954.604	0.558366	0.122741	4.54912	5.39e-06	0.000198229
HP1BP3	9914.47	0.331891	0.0729789	4.54776	5.42e-06	0.000199069
STK38	604.012	0.414262	0.0912347	4.54062	5.61e-06	0.000205015
LINC00574	25.0189	1.23199	0.271313	4.54083	5.6e-06	0.000205015
GYG1	1480.26	-1.19789	0.263854	-4.53998	5.63e-06	0.000205182
RAB5C	7095.74	-0.181967	0.0400981	-4.53804	5.68e-06	0.000206612
RWDD2B	284.154	-0.998888	0.220594	-4.52818	5.95e-06	0.000215981
CEP162	326.368	0.47503	0.104915	4.52774	5.96e-06	0.000215981
TIA1	2111.2	0.637028	0.140811	4.52399	6.07e-06	0.000219359
DDX60	162.384	-0.494429	0.109306	-4.52332	6.09e-06	0.000219569
NPPC	226.677	-2.10559	0.465797	-4.5204	6.17e-06	0.000222131
PCDHGC3	2262.18	-0.896553	0.198441	-4.51797	6.24e-06	0.000224203
CDK12	2274.63	0.207269	0.0458822	4.51742	6.26e-06	0.000224295
SLC24A3	1339.61	-1.08171	0.239519	-4.51618	6.3e-06	0.000225119
TBX10	27.7507	2.00171	0.443398	4.51448	6.35e-06	0.000226443
GPR37L1	89.1984	-1.56817	0.347815	-4.50864	6.52e-06	0.000232252
SMARCC2	10781.7	0.160131	0.0355701	4.50184	6.74e-06	0.000239289
TUBA4A	724.205	-0.613841	0.136413	-4.49987	6.8e-06	0.000240997
N4BP2	2277.79	0.36087	0.0802667	4.49589	6.93e-06	0.000245022
PIP4K2C	1097.14	-0.339271	0.0755313	-4.4918	7.06e-06	0.000249241
PHOX2A	46.2696	-3.21573	0.716529	-4.48793	7.19e-06	0.000253157
INPP4B	119.2	-0.924955	0.206115	-4.48756	7.2e-06	0.000253157
SIPA1L2	6922.45	0.228089	0.0508486	4.48565	7.27e-06	0.000254886
DNER	24897.8	-0.518577	0.115713	-4.48159	7.41e-06	0.00025923
SDHAP3	154.41	0.598407	0.133706	4.47554	7.62e-06	0.000266112
COL6A5	19.7337	-3.3405	0.746681	-4.47381	7.68e-06	0.000267711
ZNF300P1	10.6524	-5.75262	1.28649	-4.47155	7.77e-06	0.000269976
STAC2	543.814	-0.740904	0.165772	-4.4694	7.84e-06	0.000272122
LINC00667	1735.62	0.360219	0.0806222	4.46799	7.9e-06	0.000272971
PIAS2	1277.85	0.211059	0.0472443	4.46738	7.92e-06	0.000272971
AFF4	13081	0.245731	0.0550043	4.46749	7.91e-06	0.000272971
PPP1R1A	2220.03	-1.2024	0.26918	-4.46688	7.94e-06	0.000273044
C5orf38	250.117	-3.28433	0.735732	-4.46404	8.04e-06	0.00027611
TRIM65	630.284	0.554356	0.124215	4.46286	8.09e-06	0.000277052
LRRCC1	694.296	0.320212	0.071758	4.46238	8.11e-06	0.000277088
SYNE2	7438.82	0.779689	0.174765	4.46135	8.14e-06	0.000277848
UBXN2A	772.866	0.224533	0.0503346	4.4608	8.17e-06	0.000277978
SLC35E2B	5944.21	0.215244	0.0482586	4.46022	8.19e-06	0.000278153
PLD5	264.979	-2.66436	0.597575	-4.45862	8.25e-06	0.000279657
ESRRB	603.86	-2.91298	0.653413	-4.45809	8.27e-06	0.000279768
PGM2	700.307	-0.361895	0.0812208	-4.45569	8.36e-06	0.000282335
ATHL1	57.1974	1.37678	0.309057	4.45477	8.4e-06	0.000282497
PTPRR	290.955	-1.84758	0.414749	-4.45469	8.4e-06	0.000282497
FLVCR1	579.624	0.462596	0.103889	4.45282	8.48e-06	0.000283902
GOLGA6L17P	13.0909	1.77243	0.398054	4.45274	8.48e-06	0.000283902
UBR3	5021.86	-0.253345	0.0569752	-4.44658	8.72e-06	0.000290973
TBC1D31	246.302	0.580934	0.130637	4.44693	8.71e-06	0.000290973
ADM	1188.19	-1.48863	0.334873	-4.44535	8.77e-06	0.000292025
PPWD1	533.905	0.260372	0.0585773	4.44493	8.79e-06	0.000292025
GLI1	50.7664	-1.7157	0.386056	-4.44419	8.82e-06	0.000292439
SNRPN	202.851	-0.782825	0.176262	-4.44125	8.94e-06	0.000295862
ICE2	1308.3	0.301508	0.0679032	4.44027	8.98e-06	0.000296625
WWC2	714.748	-0.673763	0.151809	-4.43824	9.07e-06	0.000298822
FAM193A	2721.02	0.286861	0.0646738	4.4355	9.19e-06	0.000302042
RGS16	1350.15	-0.659346	0.148689	-4.4344	9.23e-06	0.000302985
LINC00693	151.556	-2.52575	0.569744	-4.43314	9.29e-06	0.000304154
HAS2	72.1602	-2.19644	0.495805	-4.43006	9.42e-06	0.000307915
ERMP1	1054.01	-0.364328	0.0823223	-4.42564	9.62e-06	0.000313663
FSTL5	5078.9	-1.27195	0.287434	-4.42519	9.64e-06	0.000313693
WBSCR17	2462.54	-0.913543	0.206506	-4.42381	9.7e-06	0.000315072
ALDH1A1	29.6369	-2.03047	0.459044	-4.42325	9.72e-06	0.00031527
RGMB.AS1	102.154	-1.8982	0.42969	-4.4176	9.98e-06	0.000322611
KLHL13	3691.31	-1.48221	0.335538	-4.41742	9.99e-06	0.000322611
SNCG	284.62	-1.58519	0.358998	-4.41558	1.01e-05	0.000324092
CD99L2	6937.96	-0.265274	0.0600769	-4.41558	1.01e-05	0.000324092
TMEM65	2496.99	-0.36438	0.0825819	-4.41235	1.02e-05	0.000328321
ZNF572	110.784	-0.735708	0.16682	-4.41018	1.03e-05	0.000330971
KCNA4	159.289	0.779996	0.176924	4.40865	1.04e-05	0.00033267
CRYZ	373.158	-2.96397	0.672868	-4.40498	1.06e-05	0.000337687
DUOX1	166.336	0.798838	0.181411	4.40346	1.07e-05	0.000339401
CCDC138	336.808	0.383442	0.0871426	4.40016	1.08e-05	0.000343272
PIM2	389.074	-0.597462	0.135771	-4.4005	1.08e-05	0.000343272
OLIG3	65.985	-2.9559	0.673106	-4.39143	1.13e-05	0.000356658
LOC440300	17.2283	1.57493	0.358811	4.38931	1.14e-05	0.000359463
PKP2	292.128	-0.52652	0.119971	-4.38873	1.14e-05	0.000359727
CACNA1G	1954.76	-0.837751	0.190913	-4.38813	1.14e-05	0.000360026
PXDN	1313.04	0.58582	0.133546	4.38665	1.15e-05	0.000361783
CYP46A1	620.703	-1.00984	0.230249	-4.38586	1.16e-05	0.000362403
PPIF	1294.05	-0.223035	0.0509588	-4.37677	1.2e-05	0.000377114
HELZ	1931.67	0.328757	0.0751273	4.376	1.21e-05	0.000377114
NEK1	1345.85	0.235832	0.0538928	4.37595	1.21e-05	0.000377114
ATG9A	3126.6	-0.181538	0.0415203	-4.37228	1.23e-05	0.000382769
PRORSD1P	30.9444	1.27946	0.2929	4.36825	1.25e-05	0.000388437
HMGN1	6127.99	0.425297	0.0973595	4.36831	1.25e-05	0.000388437
CARS	3345.3	-0.380855	0.0872216	-4.36652	1.26e-05	0.00039078
CCDC85C	2917.98	-0.311551	0.0713813	-4.36461	1.27e-05	0.000391299
GPATCH1	547.16	0.328234	0.0751968	4.365	1.27e-05	0.000391299
CEP68	3403.94	0.237378	0.0543873	4.36458	1.27e-05	0.000391299
PCM1	9171.08	0.19963	0.045732	4.36521	1.27e-05	0.000391299
COPS7A	1689.54	-0.210329	0.0482237	-4.36151	1.29e-05	0.000396082
GZF1	1543.67	-0.199071	0.0456529	-4.36053	1.3e-05	0.000396386
DIP2A	1518.45	0.358862	0.0822955	4.36065	1.3e-05	0.000396386
CSTF2T	2998.55	-0.158529	0.0363603	-4.35995	1.3e-05	0.000396702
KCNC3	827.457	-2.47078	0.567456	-4.35412	1.34e-05	0.000406105
NRG1	2295.13	-1.3582	0.311955	-4.35385	1.34e-05	0.000406105
CNTNAP3B	143.139	1.0807	0.248232	4.3536	1.34e-05	0.000406105
PPP3CA	5253.21	0.304847	0.0700483	4.35195	1.35e-05	0.000408408
CTH	307.027	-0.492412	0.113167	-4.3512	1.35e-05	0.000409049
RBM8A	6475.57	0.223814	0.0514483	4.35026	1.36e-05	0.000409301
ZNF302	2100.68	0.332728	0.0764789	4.35058	1.36e-05	0.000409301
PLA2G15	1174.62	-0.408409	0.0939316	-4.34794	1.37e-05	0.000412893
AKT1	7746.73	0.165845	0.0381495	4.34722	1.38e-05	0.000413489
ETFB	5914.27	-0.874628	0.201314	-4.34459	1.4e-05	0.00041771
PCID2	722.642	0.289019	0.0666058	4.33924	1.43e-05	0.000427227
IRX5	576.245	-3.37075	0.777423	-4.3358	1.45e-05	0.000432715
RTCB	3291.89	-0.22747	0.0524652	-4.33564	1.45e-05	0.000432715
SLC35D1	654.864	0.480889	0.110979	4.33316	1.47e-05	0.000436827
TCOF1	2127.55	0.312376	0.0721192	4.33138	1.48e-05	0.000439566
PI4KAP2	362.973	0.549432	0.126889	4.33001	1.49e-05	0.000441511
ZRANB3	353.345	0.291958	0.0674332	4.32958	1.49e-05	0.000441567
CIAO1	3986.52	-0.106719	0.0246651	-4.32674	1.51e-05	0.000445711
RPS6KA6	643.177	0.308114	0.0712116	4.32673	1.51e-05	0.000445711
SPAST	5277.21	0.399767	0.0924224	4.32544	1.52e-05	0.000445929
LOC93622	973.076	0.359576	0.0831218	4.32589	1.52e-05	0.000445929
NBAT1	116.578	-0.908524	0.210024	-4.32581	1.52e-05	0.000445929
HERC2P3	174.97	1.36327	0.315414	4.32216	1.55e-05	0.000451793
SH2D5	228.165	-0.598842	0.13859	-4.32096	1.55e-05	0.000451841
GPR137	1932.79	-0.258755	0.0598789	-4.3213	1.55e-05	0.000451841
LOC100996694	20.4119	-3.19852	0.740215	-4.32106	1.55e-05	0.000451841
UPF1	6340.48	-0.181804	0.0420824	-4.32019	1.56e-05	0.00045247
LINC00342	62.5057	1.84907	0.428038	4.31987	1.56e-05	0.00045247
SOX15	176.69	-0.657398	0.152247	-4.31797	1.57e-05	0.000455582
SLC25A3	11365	-0.186639	0.0432315	-4.31719	1.58e-05	0.000456377
ATP6V0E1	1325.81	-0.403563	0.0934932	-4.31649	1.59e-05	0.000457022
ISCA2	709.499	-0.218397	0.0506158	-4.3148	1.6e-05	0.000459723
DHX34	521.198	0.394876	0.0916179	4.31003	1.63e-05	0.000468934
C1QL4	361.62	-3.08143	0.715718	-4.30537	1.67e-05	0.000478078
URB1.AS1	29.1873	-1.49721	0.347863	-4.30401	1.68e-05	0.000480185
FZD10	906.822	-4.45245	1.03472	-4.30304	1.68e-05	0.000480612
FNDC1	65.2707	-1.45442	0.337991	-4.30314	1.68e-05	0.000480612
GPALPP1	507.613	0.452692	0.105322	4.29817	1.72e-05	0.000489726
SHPRH	1086.16	0.309919	0.0721058	4.29811	1.72e-05	0.000489726
TTC28.AS1	439.566	0.35951	0.0836543	4.29756	1.73e-05	0.000490074
SMPD1	1825.98	-0.400928	0.0933006	-4.29716	1.73e-05	0.000490115
ST6GALNAC2	33.9399	-1.31774	0.306691	-4.29664	1.73e-05	0.000490423
TUNAR	588.773	-1.38872	0.323261	-4.29596	1.74e-05	0.000491084
AMPD2	3742.55	-0.221055	0.0514685	-4.29495	1.75e-05	0.000492479
POSTN	91.4165	-2.31854	0.540408	-4.29034	1.78e-05	0.000501933
LINC01521	533.995	0.428734	0.0999617	4.28899	1.79e-05	0.000504142
HSBP1L1	105.353	0.677261	0.157979	4.28704	1.81e-05	0.000507703
SPRYD3	2932.32	-0.374057	0.0873227	-4.28362	1.84e-05	0.000514691
COASY	2589.75	-0.193805	0.0452695	-4.28113	1.86e-05	0.000518713
PTX3	578.225	-0.80416	0.187826	-4.28141	1.86e-05	0.000518713
SOGA1	6436.89	0.245731	0.0574105	4.28025	1.87e-05	0.000519888
LOC102723828	38.6564	-2.95871	0.691341	-4.27968	1.87e-05	0.000520343
DDX46	3016.48	0.307606	0.0719059	4.27789	1.89e-05	0.000523643
ZMYND8	3431.05	0.161479	0.0377531	4.27723	1.89e-05	0.000524305
PCDHA8	63.3786	1.10073	0.257432	4.2758	1.9e-05	0.000526791
SPATA5L1	531.851	0.230097	0.05383	4.27452	1.92e-05	0.000528953
MAB21L2	327.172	-4.50235	1.05368	-4.27298	1.93e-05	0.000531724
ENPP2	1040.57	-1.68508	0.39481	-4.26809	1.97e-05	0.000542596
MIB1	9627.14	0.176366	0.0413718	4.26294	2.02e-05	0.000553698
HNRNPM	7839.32	-0.496243	0.116431	-4.26211	2.03e-05	0.000553698
TIGD1	733.578	0.376781	0.0883962	4.26242	2.02e-05	0.000553698
ABHD12	2201.11	-0.255682	0.0599902	-4.26207	2.03e-05	0.000553698
PLOD3	1154.91	-0.310203	0.0727907	-4.26158	2.03e-05	0.000553996
THAP2	1210	0.192141	0.0451083	4.25954	2.05e-05	0.000558134
SYT2	755.221	-2.4582	0.577398	-4.25738	2.07e-05	0.000561686
MUSK	11.582	-1.67477	0.39338	-4.25738	2.07e-05	0.000561686
GPR26	869.825	-1.72216	0.404707	-4.25532	2.09e-05	0.000565515
PLSCR4	236.173	-1.28234	0.301365	-4.25512	2.09e-05	0.000565515
KIAA1841	649.285	0.534059	0.12562	4.2514	2.12e-05	0.000574037
FAM26E	8.8159	-3.41072	0.802481	-4.25022	2.14e-05	0.000576109
ALDOA	54107	-0.610473	0.143691	-4.24852	2.15e-05	0.000579543
GLO1	5713.71	-0.323554	0.0761877	-4.2468	2.17e-05	0.000583053
GRIN3A	694.96	-2.67708	0.630659	-4.24489	2.19e-05	0.000587081
TRIM8	3570.62	-0.338076	0.0797175	-4.24092	2.23e-05	0.000596578
SMC5	1720.59	0.316304	0.0746221	4.23874	2.25e-05	0.000600444
ANGPTL2	1776.77	-1.19139	0.281065	-4.23884	2.25e-05	0.000600444
CCNA1	388.34	-0.38885	0.0917498	-4.23816	2.25e-05	0.000601027
BARHL1	1197.57	-4.3789	1.03334	-4.23761	2.26e-05	0.000601506
MLC1	3098.04	-0.85899	0.202915	-4.23325	2.3e-05	0.000612316
WNT3	947.921	-1.10608	0.261349	-4.23219	2.31e-05	0.000614209
DTWD1	682.495	0.33625	0.0794816	4.23054	2.33e-05	0.000617721
LBX1	92.1899	-4.06427	0.961113	-4.22872	2.35e-05	0.000621741
BTBD3	9087.58	-1.6056	0.379741	-4.22813	2.36e-05	0.000622352
ACSL3	6029.9	-0.210721	0.0498863	-4.22404	2.4e-05	0.000632754
LRRC37A4P	281.093	1.17341	0.27783	4.22347	2.41e-05	0.000633326
EBF1	1790.6	-3.51609	0.832618	-4.22294	2.41e-05	0.000633813
TMEM47	4958.47	-0.852923	0.202005	-4.22229	2.42e-05	0.000634607
PHKA2	848.673	-0.218778	0.0518211	-4.2218	2.42e-05	0.000634981
RCAN2	1792.25	-2.14638	0.508637	-4.21987	2.44e-05	0.00063941
CYP2S1	40.934	-1.15338	0.273483	-4.21739	2.47e-05	0.000645464
BLVRB	1115.62	-0.278586	0.0661188	-4.21342	2.52e-05	0.00065555
ZFAND2A	640.845	-0.3518	0.0835001	-4.21317	2.52e-05	0.00065555
CDK16	11336.3	0.315933	0.0750164	4.21152	2.54e-05	0.000659315
CHD1	1841.88	0.220458	0.052362	4.21027	2.55e-05	0.000661918
MUT	2458.49	-0.145665	0.0346082	-4.20899	2.57e-05	0.000664619
PHF2	5079.86	0.238617	0.0567417	4.20533	2.61e-05	0.00067441
MAP2K6	667.175	0.37156	0.0883702	4.20458	2.62e-05	0.00067506
QRICH2	280.037	0.698245	0.166075	4.2044	2.62e-05	0.00067506
AUH	306.425	0.362749	0.0863	4.20334	2.63e-05	0.000677143
CARS2	619.526	0.255448	0.060853	4.19779	2.7e-05	0.000692868
KCNK15	28.8195	-1.33985	0.319259	-4.19675	2.71e-05	0.000693049
ACVR2B.AS1	77.8564	0.680405	0.16213	4.19667	2.71e-05	0.000693049
SUN1	3945.5	0.246963	0.058845	4.19684	2.71e-05	0.000693049
ZNF542P	1555.47	-0.477149	0.113953	-4.18725	2.82e-05	0.000721306
TMEM161A	567.08	-0.298464	0.0713143	-4.1852	2.85e-05	0.000726726
DDIT4	16269.1	-0.48345	0.115702	-4.1784	2.94e-05	0.000745654
LOC100128398	324.515	0.626835	0.150013	4.17855	2.93e-05	0.000745654
PRDM13	267.425	-4.26104	1.0198	-4.17829	2.94e-05	0.000745654
MAGED1	22467.5	-0.306132	0.0732903	-4.17698	2.95e-05	0.000748787
GRM1	1921.34	-1.50937	0.361421	-4.17621	2.96e-05	0.00075019
ATOH1	456.271	-4.89543	1.17242	-4.17548	2.97e-05	0.000751423
SLC1A6	4869.34	-1.27343	0.305069	-4.17425	2.99e-05	0.000754347
BCAP29	1782.61	0.431492	0.103385	4.17363	3e-05	0.000755232
CASP8AP2	1341.28	0.347193	0.0832012	4.17294	3.01e-05	0.000756361
SRRM1	2540.36	0.30498	0.0731132	4.17134	3.03e-05	0.000760531
KIF7	645.705	0.264619	0.063503	4.16704	3.09e-05	0.000773814
NME3	653.928	0.35067	0.0841687	4.16628	3.1e-05	0.00077403
ZC3HAV1L	96.9808	0.637033	0.152898	4.1664	3.09e-05	0.00077403
PLA2G4A	52.9565	-2.06446	0.495599	-4.16559	3.11e-05	0.000774126
RGMB	7975.14	-0.788175	0.189212	-4.16555	3.11e-05	0.000774126
SLC5A7	133.24	-4.1729	1.00209	-4.16418	3.12e-05	0.000777612
TRPM7	758.162	0.451218	0.108388	4.16299	3.14e-05	0.000780512
PRPF4B	1937.12	0.277847	0.0667631	4.16169	3.16e-05	0.000783755
MRPS31P5	594.982	0.521995	0.125545	4.15783	3.21e-05	0.000795905
DNASE1	448.153	0.687383	0.165375	4.1565	3.23e-05	0.000799355
HEPACAM	536.322	-0.977339	0.235163	-4.15601	3.24e-05	0.00079987
HDHD1	746.674	0.443833	0.106816	4.15512	3.25e-05	0.000801769
GAPDH	85925.7	-0.601032	0.144682	-4.15417	3.26e-05	0.000802132
LOC101929378	33.9208	1.05799	0.254692	4.15399	3.27e-05	0.000802132
LOC102546226	22.5467	1.53853	0.370318	4.15461	3.26e-05	0.000802132
YIF1B	1947.8	-0.273567	0.0658658	-4.1534	3.28e-05	0.000802423
SST	155.9	-4.10583	0.988591	-4.15322	3.28e-05	0.000802423
SEC63	6676.42	0.34489	0.0831041	4.15009	3.32e-05	0.000811098
PRKAR1B	5179.22	-0.297783	0.0717535	-4.15008	3.32e-05	0.000811098
IRX3	507.124	-3.8804	0.9352	-4.14927	3.34e-05	0.000812735
FZD10.AS1	268.479	-3.43349	0.827775	-4.14785	3.36e-05	0.000814859
WDFY2	619.825	0.338204	0.0815475	4.14733	3.36e-05	0.000814859
APOE	4181.61	-1.2066	0.290932	-4.14738	3.36e-05	0.000814859
NXPH1	539.263	-3.36506	0.811382	-4.14732	3.36e-05	0.000814859
LOC729683	416.827	0.535809	0.129223	4.1464	3.38e-05	0.000816553
TMEM38A	314.351	-0.525209	0.126673	-4.14617	3.38e-05	0.000816553
ASB16.AS1	76.0125	0.584282	0.140941	4.14556	3.39e-05	0.000817496
NUDT12	1232.39	-0.571495	0.137967	-4.14227	3.44e-05	0.0008281
VTCN1	31.5779	-0.830839	0.200849	-4.13663	3.52e-05	0.000846238
TRIP11	1427.33	0.283582	0.0685535	4.13665	3.52e-05	0.000846238
PVALB	9.52854	-2.67785	0.647863	-4.13336	3.58e-05	0.000857117
REREP3	156.277	-3.35358	0.81143	-4.13293	3.58e-05	0.000857463
ANAPC16	1552.53	0.349336	0.0845475	4.13183	3.6e-05	0.00086033
ZNF91	5268.12	0.333558	0.0807895	4.12873	3.65e-05	0.000870709
C3orf58	2988.26	-1.29872	0.314866	-4.12468	3.71e-05	0.000884905
GBX2	149.355	-2.51601	0.610218	-4.12312	3.74e-05	0.000889598
FAM219B	1636.58	0.325443	0.0789468	4.12231	3.75e-05	0.000891461
DIABLO	2555.19	-0.204171	0.0495374	-4.12156	3.76e-05	0.000893058
CCNYL1	651.338	0.548917	0.133339	4.11671	3.84e-05	0.000910744
TRIM58	70.0992	-1.16482	0.283047	-4.11528	3.87e-05	0.000915064
DLGAP3	2339.12	-0.504514	0.122646	-4.11358	3.9e-05	0.000917873
SLC35F4	110.991	-2.58625	0.628646	-4.114	3.89e-05	0.000917873
C3orf80	104.444	-0.740053	0.179893	-4.11385	3.89e-05	0.000917873
SLC25A23	4945.22	-0.225101	0.0547356	-4.11252	3.91e-05	0.000920767
AMT	264.165	1.03578	0.251921	4.11153	3.93e-05	0.000923402
SP5	1101.58	-3.59831	0.875489	-4.11006	3.96e-05	0.000927986
MCC	1392.05	-1.6438	0.400018	-4.10931	3.97e-05	0.000928666
SGK1	406.75	-0.424277	0.10325	-4.10923	3.97e-05	0.000928666
ZNF607	1006.66	0.212645	0.0517839	4.10639	4.02e-05	0.000938202
PKIB	440.814	1.27732	0.31107	4.10621	4.02e-05	0.000938202
RND2	2058.29	-1.28619	0.313265	-4.10575	4.03e-05	0.00093871
WBP2	7125.35	-0.171504	0.0418103	-4.10195	4.1e-05	0.000952921
POMGNT1	2405.72	0.264689	0.0645816	4.09852	4.16e-05	0.000965784
PRKCI	2607.11	0.256524	0.0625967	4.09804	4.17e-05	0.000966415
PCP4L1	2817.46	-2.9502	0.719968	-4.09768	4.17e-05	0.00096654
PRRG3	90.4959	1.05553	0.257637	4.09697	4.19e-05	0.000968165
NUMB	1683.35	0.318773	0.0778187	4.09635	4.2e-05	0.000969356
SSTR1	244.009	-1.49992	0.366199	-4.09593	4.2e-05	0.000969756
ZNF680	873.455	-0.381638	0.0931885	-4.09533	4.22e-05	0.000970904
TNRC6A	2857.51	0.38952	0.0951416	4.09411	4.24e-05	0.000973307
EYA2	228.746	-2.53514	0.619186	-4.09431	4.23e-05	0.000973307
CHRNA3	829.945	-1.44862	0.354362	-4.08798	4.35e-05	0.00099381
VAC14	1899.95	-0.207038	0.0506419	-4.08826	4.35e-05	0.00099381
ZNF726	34.9552	-0.996099	0.24363	-4.08857	4.34e-05	0.00099381
CEP250	3123.41	0.277653	0.067905	4.08884	4.34e-05	0.00099381
CPNE7	225.353	-1.42363	0.348292	-4.08746	4.36e-05	0.000994631
TRIM33	4878.71	0.205349	0.0502846	4.08373	4.43e-05	0.00100635
ZNF610	562.259	0.331144	0.0810941	4.08345	4.44e-05	0.00100635
FAM196B	260.108	-1.3082	0.320302	-4.08428	4.42e-05	0.00100635
MRPL32	639.427	0.226092	0.0553656	4.08362	4.43e-05	0.00100635
DFFB	226.978	0.621713	0.152305	4.08203	4.46e-05	0.00101064
GUK1	6978.22	-0.25992	0.0636774	-4.08182	4.47e-05	0.00101064
MAMDC2	75.0353	0.759628	0.186217	4.07927	4.52e-05	0.00102038
MASP1	7148.49	-0.825149	0.202359	-4.07764	4.55e-05	0.00102615
BCAM	973.499	-0.545745	0.133921	-4.07511	4.6e-05	0.00103592
AIPL1	12.1068	-3.01027	0.738935	-4.0738	4.63e-05	0.00103893
LOC102724623	66.3848	-2.8333	0.695476	-4.0739	4.62e-05	0.00103893
C11orf57	2417.3	0.210309	0.0516381	4.07275	4.65e-05	0.00104114
RDH11	4789.35	-0.126964	0.0311748	-4.07267	4.65e-05	0.00104114
PCDHB3	384.571	0.673112	0.165299	4.0721	4.66e-05	0.00104226
HNRNPDL	12378.9	0.189482	0.0465397	4.0714	4.67e-05	0.00104398
PKD2	527.778	0.35992	0.0884117	4.07096	4.68e-05	0.00104454
ZC3H7B	8807.54	0.124534	0.0306	4.06972	4.71e-05	0.00104865
LOC441666	110.926	-2.11398	0.519571	-4.06871	4.73e-05	0.00105076
CLPTM1	6113.13	-0.272645	0.0670117	-4.06862	4.73e-05	0.00105076
HPSE	35.2345	-1.66168	0.408487	-4.06788	4.74e-05	0.00105266
PCSK7	1161.66	0.417014	0.102536	4.067	4.76e-05	0.00105381
LTBP4	3114.72	0.396461	0.0974775	4.0672	4.76e-05	0.00105381
RPAP2	575.878	0.264869	0.0651532	4.06532	4.8e-05	0.00105855
STOM	1226.33	-0.652945	0.160611	-4.06538	4.8e-05	0.00105855
TSPAN7	12947.4	-0.485669	0.119492	-4.06443	4.81e-05	0.00106086
CHST7	732.398	-1.02674	0.252632	-4.06419	4.82e-05	0.00106086
NPHP1	85.3156	-0.696422	0.171406	-4.06301	4.84e-05	0.00106338
ZCCHC6	1546.88	0.249498	0.0614057	4.0631	4.84e-05	0.00106338
TMEM176B	39.222	-1.20284	0.296072	-4.06265	4.85e-05	0.00106359
PSIP1	13214.6	0.270643	0.0666293	4.06192	4.87e-05	0.00106547
PSMF1	4441.05	-0.16257	0.040035	-4.06069	4.89e-05	0.00106883
UQCC2	979.295	-0.262749	0.0647076	-4.06057	4.9e-05	0.00106883
HSD17B8	242.242	-0.580706	0.14304	-4.05975	4.91e-05	0.00107113
GPR137C	1571.96	-0.437517	0.107807	-4.05835	4.94e-05	0.00107616
LINC00909	707.408	0.366256	0.0902756	4.05709	4.97e-05	0.00107857
ZNF217	1288.73	-0.362264	0.0892908	-4.05713	4.97e-05	0.00107857
TPST2	464.79	-0.439394	0.108308	-4.0569	4.97e-05	0.00107857
TRDMT1	354.486	0.434443	0.107115	4.05584	5e-05	0.00108035
NDUFA4L2	2598.85	-1.43017	0.352695	-4.05498	5.01e-05	0.00108035
NPIPB5	33.9933	0.838458	0.206733	4.05574	5e-05	0.00108035
VRK2	131.761	1.45306	0.358341	4.05497	5.01e-05	0.00108035
DOPEY1	1632.28	0.356769	0.0879769	4.05525	5.01e-05	0.00108035
CDS1	1325.76	-0.758355	0.187041	-4.05449	5.02e-05	0.00108114
LINC00623	412.298	-1.05546	0.260354	-4.05396	5.04e-05	0.00108216
TMEM231	1459.6	-0.227839	0.0562105	-4.05331	5.05e-05	0.00108234
GLYCTK.AS1	55.5958	-2.14838	0.530023	-4.05337	5.05e-05	0.00108234
ZNF571.AS1	196.83	-1.25262	0.30913	-4.05208	5.08e-05	0.00108664
FGF3	175.249	-4.53698	1.12012	-4.05046	5.11e-05	0.00109275
TMEM213	10.6545	1.83722	0.453621	4.05013	5.12e-05	0.00109288
EXT2	3780.5	-0.224218	0.0554047	-4.04691	5.19e-05	0.00110655
CCDC85A	600.974	-0.867959	0.21449	-4.04661	5.2e-05	0.00110655
ERCC6L2	1234.82	0.259252	0.0641001	4.04448	5.24e-05	0.00111517
FIBIN	511.361	-1.70885	0.422558	-4.04407	5.25e-05	0.00111571
CDHR3	371.59	1.01449	0.250879	4.04373	5.26e-05	0.00111586
HHIP	57.3659	-2.15396	0.532838	-4.04242	5.29e-05	0.00112068
OLFM3	885.7	-1.42716	0.353213	-4.04051	5.33e-05	0.001127
SLC6A7	162.451	-1.54542	0.382482	-4.04049	5.33e-05	0.001127
HMOX1	416.772	-1.08446	0.268444	-4.03981	5.35e-05	0.00112738
WDR31	256.402	0.376382	0.0931657	4.03992	5.35e-05	0.00112738
TSSK6	72.7782	0.910327	0.22539	4.03889	5.37e-05	0.00113035
DPF3	617.926	-0.612784	0.151781	-4.0373	5.41e-05	0.0011366
GRPEL2	1338.95	-0.275641	0.0682824	-4.03678	5.42e-05	0.00113675
ELOVL5	3905.36	-0.283764	0.0702968	-4.03666	5.42e-05	0.00113675
NDRG4	16850.7	-0.737871	0.18281	-4.03627	5.43e-05	0.00113719
LOC100287042	110.081	0.483542	0.119874	4.03375	5.49e-05	0.00114798
ZBED5	2160.02	0.164076	0.0406977	4.03158	5.54e-05	0.00115719
MRPL17	1600.85	-0.334618	0.0830614	-4.02856	5.61e-05	0.00117062
SPINK5	43.022	-0.66357	0.164836	-4.02564	5.68e-05	0.00118374
PGAM1	17342	-0.543125	0.134942	-4.02489	5.7e-05	0.00118603
ADAMTSL2	143.29	-0.884735	0.219832	-4.02459	5.71e-05	0.00118606
RAB27B	371.13	-1.49152	0.370684	-4.02371	5.73e-05	0.00118899
FAF2	3662.82	-0.181477	0.0451437	-4.01999	5.82e-05	0.00120639
COX7A2L	5347.8	-0.160773	0.0400027	-4.01904	5.84e-05	0.0012097
PRPH2	33.2111	-3.41875	0.850792	-4.01832	5.86e-05	0.0012119
ALDH1L2	952.811	0.299757	0.0746143	4.01742	5.88e-05	0.00121501
EIF4EBP2	9212.08	0.259961	0.0647214	4.01662	5.9e-05	0.00121757
MRPL49	2281.35	-0.161887	0.0403096	-4.01608	5.92e-05	0.00121886
RNF213	1335.22	0.434929	0.108332	4.01476	5.95e-05	0.00122416
FLJ16779	617.483	-1.52496	0.379892	-4.01418	5.97e-05	0.00122562
PNMA6A	547.541	-0.552758	0.137727	-4.01344	5.98e-05	0.0012279
TADA2A	557.823	0.473206	0.117915	4.01312	5.99e-05	0.00122805
SMURF2	1241.5	0.240914	0.0600601	4.01122	6.04e-05	0.00123644
ADAMTS9.AS2	25.5487	0.849554	0.211867	4.00985	6.08e-05	0.00124208
LOC285074	500.877	0.497777	0.124185	4.00836	6.11e-05	0.0012484
CTIF	7602.89	0.186601	0.0465824	4.00582	6.18e-05	0.0012603
CDH8	996.211	-1.00892	0.251983	-4.00393	6.23e-05	0.00126728
JADE3	973.563	-0.221893	0.0554177	-4.00401	6.23e-05	0.00126728
EP400	4232.6	0.24774	0.0618982	4.00237	6.27e-05	0.00127304
FBLN5	1034.31	-1.66236	0.415354	-4.00227	6.27e-05	0.00127304
C2orf68	1018.77	0.251432	0.0628324	4.00164	6.29e-05	0.00127416
RAI14	2909.2	0.911912	0.227894	4.00147	6.29e-05	0.00127416
ACCS	22.2185	1.35265	0.338066	4.00113	6.3e-05	0.00127429
SHD	1016.05	-0.733749	0.183398	-4.00087	6.31e-05	0.00127429
LOC101928834	44.6114	-2.67755	0.669413	-3.99985	6.34e-05	0.00127507
CRCP	1756.76	0.223797	0.0559505	3.99991	6.34e-05	0.00127507
NEFL	13061.5	-1.45247	0.363106	-4.00011	6.33e-05	0.00127507
STAC	219.769	-0.969074	0.242301	-3.99946	6.35e-05	0.00127556
LINC00294	500.012	0.646222	0.16161	3.99865	6.37e-05	0.00127841
PIK3CD	776.309	0.701217	0.175462	3.9964	6.43e-05	0.00128899
ZNF528	251.798	-1.55531	0.389205	-3.99611	6.44e-05	0.00128901
C5orf45	177.791	0.380113	0.09517	3.99405	6.5e-05	0.00129711
LSM8	1736.71	0.28458	0.0712476	3.99424	6.49e-05	0.00129711
NDUFA3	776.66	-0.351434	0.0880795	-3.98996	6.61e-05	0.00131644
SLC6A3	79.952	-3.43944	0.862009	-3.99003	6.61e-05	0.00131644
BICC1	301.186	-0.381119	0.0955345	-3.98933	6.63e-05	0.00131711
ZNF582	127.491	-0.481179	0.120618	-3.98927	6.63e-05	0.00131711
TRIB2	11034.6	-0.517855	0.129849	-3.98813	6.66e-05	0.00131865
TNIP1	4072.24	-0.60161	0.150843	-3.9883	6.65e-05	0.00131865
ARFGEF1	2545.08	0.497814	0.124812	3.9885	6.65e-05	0.00131865
ZIC1	19155	-2.93678	0.736517	-3.98739	6.68e-05	0.00132114
ENOPH1	5211.37	-0.140372	0.0352126	-3.98642	6.71e-05	0.00132497
GABPA	1869.29	0.310657	0.0779859	3.9835	6.79e-05	0.00133975
ANKRD36C	388.132	0.547611	0.137499	3.98265	6.82e-05	0.00134291
WAPL	2915.29	0.196675	0.049394	3.98175	6.84e-05	0.00134638
EBF3	6138.61	-2.0235	0.508521	-3.9792	6.91e-05	0.00135931
PTF1A	132.923	-2.15146	0.540744	-3.97871	6.93e-05	0.00136046
EBNA1BP2	1886.56	0.182584	0.0459009	3.97779	6.96e-05	0.00136104
KIAA1279	2945.22	-0.177609	0.0446528	-3.97756	6.96e-05	0.00136104
ZNF253	1065.26	0.274945	0.0691305	3.97719	6.97e-05	0.00136104
GRID2	1698.11	-2.30981	0.580762	-3.9772	6.97e-05	0.00136104
ARHGAP26	935.435	-0.761557	0.191446	-3.97791	6.95e-05	0.00136104
CCDC152	100.507	-2.5018	0.629083	-3.97689	6.98e-05	0.00136109
EMC10	6501.48	-0.362059	0.0910783	-3.97525	7.03e-05	0.00136727
IFNAR2	613.239	0.364722	0.0917418	3.97553	7.02e-05	0.00136727
ZNF792	265.154	0.320964	0.0807597	3.9743	7.06e-05	0.0013709
WRN	659.787	0.428217	0.107753	3.97406	7.07e-05	0.0013709
TESC	65.1522	-0.833826	0.209912	-3.97226	7.12e-05	0.00137965
STPG1	675.074	-0.76219	0.191944	-3.97089	7.16e-05	0.00138303
OGG1	727.182	0.316645	0.0797333	3.9713	7.15e-05	0.00138303
ECM2	162.959	-1.8015	0.453683	-3.97083	7.16e-05	0.00138303
RASA2	647.757	0.462798	0.116564	3.97034	7.18e-05	0.00138427
RBMS3	387.219	-2.69509	0.67886	-3.97002	7.19e-05	0.00138451
MYH14	281.533	-2.99556	0.754641	-3.96951	7.2e-05	0.00138581
ZNF75A	537.336	0.441897	0.111387	3.96722	7.27e-05	0.00139754
CTXN2	55.6149	-0.954052	0.24054	-3.9663	7.3e-05	0.00140133
TNNI1	109.881	-2.54244	0.641383	-3.964	7.37e-05	0.00140337
WDR45B	4949.49	-0.22116	0.0557894	-3.96419	7.36e-05	0.00140337
ZC3H8	352.29	0.744664	0.187819	3.96479	7.35e-05	0.00140337
RBM5	2228.88	0.293826	0.0740997	3.96527	7.33e-05	0.00140337
SPOCK3	1844.42	-2.46102	0.620783	-3.96438	7.36e-05	0.00140337
DDX41	3771.67	-0.156835	0.0395618	-3.96431	7.36e-05	0.00140337
TAC1	488.283	-3.03144	0.764704	-3.9642	7.36e-05	0.00140337
KLHL4	473.815	-1.21708	0.307145	-3.96254	7.42e-05	0.00141032
MRPL55	689.451	-0.24946	0.0629647	-3.96191	7.44e-05	0.00141068
ADCY6	1561.68	0.272661	0.068819	3.96201	7.43e-05	0.00141068
NIPBL	4930.92	0.236005	0.0595722	3.96165	7.44e-05	0.00141068
FAM43A	454.005	-1.00403	0.253531	-3.9602	7.49e-05	0.00141765
CDKN1C	1176.86	-1.04623	0.264328	-3.95807	7.56e-05	0.00142872
DRAM1	116.726	-0.48129	0.121632	-3.95695	7.59e-05	0.00143375
DNAJC15	462.636	0.622999	0.157471	3.95627	7.61e-05	0.00143617
CTSC	370.346	-0.49936	0.126232	-3.95589	7.63e-05	0.00143684
PCDH10	5540.63	-0.976799	0.246979	-3.95498	7.65e-05	0.00144065
NSMCE4A	571.575	0.293372	0.074192	3.95423	7.68e-05	0.00144352
LRCH2	3704.45	0.3443	0.0871158	3.95221	7.74e-05	0.00145409
MAEL	22.3048	-1.32905	0.33654	-3.94917	7.84e-05	0.00146425
FGF19	102.766	-3.48615	0.882781	-3.94906	7.85e-05	0.00146425
PTPN18	745.588	0.26941	0.0682028	3.95013	7.81e-05	0.00146425
METTL8	704.207	0.287924	0.0729074	3.94917	7.84e-05	0.00146425
PPAP2A	398.822	-0.518801	0.131375	-3.94901	7.85e-05	0.00146425
ADAMTSL1	475.608	-0.687339	0.174058	-3.9489	7.85e-05	0.00146425
SCN1A	448.429	-0.717536	0.181817	-3.94649	7.93e-05	0.00147741
SPEN	7354.23	0.434816	0.110208	3.94541	7.97e-05	0.00148236
CELF5	4873.95	0.428142	0.108536	3.94468	7.99e-05	0.0014852
AMIGO1	767.902	-0.261296	0.0662494	-3.94413	8.01e-05	0.00148696
TSPEAR.AS1	39.2972	1.04802	0.265843	3.94225	8.07e-05	0.00149693
MKL2	1891.19	0.213393	0.0541387	3.9416	8.09e-05	0.00149931
LDLRAD4	1756.17	-0.606909	0.154007	-3.94079	8.12e-05	0.00150271
EN1	192.197	-4.501	1.14268	-3.93897	8.18e-05	0.00151244
ZFP30	1759.57	0.398402	0.101186	3.93734	8.24e-05	0.00151609
SIRT2	3689.11	-0.288565	0.0732898	-3.93731	8.24e-05	0.00151609
CYP4V2	282.036	0.467547	0.11873	3.9379	8.22e-05	0.00151609
SNX3	4758.39	-0.147268	0.0374023	-3.9374	8.24e-05	0.00151609
TMX3	1359.23	0.283449	0.0719981	3.93689	8.25e-05	0.001517
MIR4500HG	111.668	-2.04052	0.518554	-3.93502	8.32e-05	0.00152522
PHOX2B	76.0646	-3.96231	1.00699	-3.93482	8.33e-05	0.00152522
ENPP5	418.324	-0.603008	0.153251	-3.93479	8.33e-05	0.00152522
PARS2	372.947	-0.321739	0.0818279	-3.9319	8.43e-05	0.00153853
LOC654342	50.8901	-2.16968	0.551788	-3.93209	8.42e-05	0.00153853
ZNF385D	845.412	-0.650837	0.165539	-3.93163	8.44e-05	0.00153853
KCNS2	183.653	-1.6736	0.425667	-3.9317	8.43e-05	0.00153853
LGR5	26.7269	-2.26362	0.576083	-3.92933	8.52e-05	0.00155068
KLHL26	1424.42	-0.246203	0.062664	-3.92894	8.53e-05	0.00155068
WFDC3	9.62082	-2.03597	0.518196	-3.92896	8.53e-05	0.00155068
USP51	316.607	-0.521274	0.132764	-3.92632	8.63e-05	0.00156589
ATG101	1409.98	-0.259956	0.0662356	-3.92471	8.68e-05	0.00157466
PRNP	8233.55	-0.388123	0.0988989	-3.92444	8.69e-05	0.0015747
LOC728673	57.2247	-0.763712	0.19469	-3.9227	8.76e-05	0.00158434
MYO9B	2229.45	0.312553	0.0797064	3.9213	8.81e-05	0.0015918
PLCE1	763.295	0.439493	0.112098	3.92061	8.83e-05	0.00159464
PAX3	904.875	-3.50547	0.894254	-3.91999	8.86e-05	0.00159694
COL4A4	121.733	-1.97887	0.504973	-3.91876	8.9e-05	0.00160192
PTK2B	1406.89	-0.362736	0.0925651	-3.91871	8.9e-05	0.00160192
FAM46A	399.132	-1.45009	0.370088	-3.91821	8.92e-05	0.00160348
IP6K1	5667	-0.15828	0.0404187	-3.91601	9e-05	0.00161644
ALDH5A1	4253.63	-0.46817	0.119573	-3.91536	9.03e-05	0.00161726
MURC	249.527	0.468065	0.119545	3.91538	9.03e-05	0.00161726
ZNF84	3991.34	0.413181	0.105557	3.91429	9.07e-05	0.00162269
PI4KAP1	166.722	1.13734	0.290591	3.91389	9.08e-05	0.0016236
ZNF518A	1131.07	0.33041	0.0844355	3.91316	9.11e-05	0.00162673
CENPJ	662.96	0.486185	0.124294	3.91157	9.17e-05	0.00163451
TENM2	5573.46	-2.20472	0.563653	-3.91148	9.17e-05	0.00163451
BNIP3	10973.2	-0.636851	0.162855	-3.91055	9.21e-05	0.00163905
FNBP1L	14920.6	0.282102	0.0721611	3.90934	9.25e-05	0.00164546
HACE1	990.785	0.433864	0.111025	3.90781	9.31e-05	0.0016541
CSRNP1	626.326	-0.337841	0.086466	-3.90721	9.34e-05	0.00165646
TRIOBP	2297.5	0.542508	0.138888	3.90609	9.38e-05	0.00166234
VAV3	382.613	-1.15712	0.296261	-3.90573	9.39e-05	0.001663
ZIC4	3702.15	-3.16692	0.811327	-3.90338	9.49e-05	0.00167744
KIAA0754	582.005	0.43877	0.112417	3.90306	9.5e-05	0.00167787
CHODL	544.2	-2.30558	0.590798	-3.90249	9.52e-05	0.00167998
BEND4	551.252	-0.525556	0.1347	-3.90167	9.55e-05	0.00168388
F5	150.1	-1.78591	0.457833	-3.90078	9.59e-05	0.00168473
ZNF818P	48.1869	1.1225	0.287763	3.90077	9.59e-05	0.00168473
ZIM2.AS1	53.0701	0.679501	0.174174	3.90127	9.57e-05	0.00168473
ZNF566	1018.59	0.559561	0.14346	3.90048	9.6e-05	0.0016849
TMEM214	1379.81	-0.263412	0.0675438	-3.89986	9.62e-05	0.00168742
LSMEM1	18.8828	1.24653	0.319695	3.89913	9.65e-05	0.00169069
L3HYPDH	94.6631	0.563949	0.144704	3.89726	9.73e-05	0.00170059
DCX	87474.3	0.606428	0.155606	3.8972	9.73e-05	0.00170059
TANC1	876.742	-0.815852	0.209576	-3.89287	9.91e-05	0.0017276
ESYT2	2282.93	0.257238	0.0660765	3.89304	9.9e-05	0.0017276
SLC9A3R2	635.859	-0.500376	0.128547	-3.89256	9.92e-05	0.00172792
ALK	236.39	-2.052	0.527299	-3.89152	9.96e-05	0.00173353
CALCOCO1	2026.78	0.205053	0.0526991	3.89102	9.98e-05	0.00173528
THOC2	2586.79	0.197819	0.0508998	3.88644	0.000101726	0.00176644
ZNF702P	1056.12	0.676857	0.174252	3.88435	0.000102604	0.00177804
OTX1	517.647	0.730888	0.188163	3.88433	0.000102611	0.00177804
MRPS7	1486.46	-0.229116	0.0589928	-3.88379	0.000102841	0.00178016
SLC30A8	31.7096	-2.40871	0.620429	-3.88233	0.000103461	0.001789
CNTN3	950.196	1.13384	0.292192	3.88046	0.000104258	0.00180088
PSPH	957.362	-0.273975	0.0706092	-3.88016	0.000104388	0.00180121
PRDM2	4776.22	0.392679	0.10121	3.87986	0.000104518	0.00180157
TYW3	103.997	-2.26871	0.585127	-3.87729	0.000105626	0.00181683
TFDP1	2879.17	0.167158	0.0431094	3.87753	0.000105523	0.00181683
NBPF12	540.178	0.432259	0.111565	3.87452	0.000106837	0.00182806
SFRP5	122.386	-0.782734	0.202001	-3.87491	0.000106666	0.00182806
CEP295	785.129	0.454146	0.117192	3.87525	0.000106517	0.00182806
KITLG	5604.66	-1.39332	0.359547	-3.8752	0.000106536	0.00182806
ANKRD55	35.3747	-2.19063	0.565366	-3.87472	0.000106747	0.00182806
NCOR1	8487.71	0.270421	0.0698457	3.87169	0.000108082	0.00184743
SLC2A5	21.5951	-1.38359	0.357658	-3.86848	0.000109515	0.00186997
LIPE	391.65	-0.285842	0.07393	-3.86639	0.00011046	0.00188415
TRAPPC2L	906.078	-0.5135	0.132827	-3.86595	0.000110659	0.00188558
MEX3A	10324.6	0.182801	0.0472928	3.86531	0.000110946	0.00188851
COX17	335.96	-0.339525	0.087927	-3.86144	0.000112721	0.00191673
JAKMIP2.AS1	16.7346	-1.65069	0.427631	-3.86007	0.000113356	0.00192553
KIF9	303.975	-0.312881	0.0810909	-3.8584	0.000114133	0.00193672
CARHSP1	5143.91	0.29385	0.0761946	3.85658	0.000114987	0.00194732
RASA1	2242.45	0.155549	0.0403336	3.85656	0.000114996	0.00194732
TGFBR3	212.742	-0.695863	0.180541	-3.85431	0.000116055	0.00196322
ZNF221	184.061	0.602127	0.156254	3.85352	0.00011643	0.00196753
NDUFB9	2640.81	-0.190176	0.0493602	-3.85283	0.000116761	0.00197109
ATM	1936.14	0.309082	0.0802671	3.85068	0.000117792	0.00198237
DNAJC28	70.0068	0.625593	0.162457	3.85083	0.000117718	0.00198237
ZNF138	1217.24	-0.30029	0.0779802	-3.85085	0.000117707	0.00198237
TMEM187	297.045	0.466731	0.121243	3.84955	0.000118336	0.00198948
CEPT1	740.537	-0.268452	0.0697879	-3.84668	0.000119728	0.0020106
SYT14	817.225	0.299564	0.0778805	3.84646	0.000119838	0.0020106
HERC2P9	142.91	1.33065	0.34599	3.8459	0.000120109	0.00201102
TOP3B	495.069	0.320465	0.083326	3.84592	0.000120102	0.00201102
MOK	399.015	0.434814	0.113075	3.84535	0.000120381	0.00201331
VPS25	1751.27	-0.176081	0.0457934	-3.84512	0.000120491	0.00201331
ATG4A	526.136	0.347459	0.0903769	3.84455	0.000120772	0.00201594
NRD1	5583.71	0.169734	0.0441691	3.84282	0.000121627	0.00202815
KIF27	377.049	0.305677	0.0795649	3.84185	0.000122109	0.00203412
FAM214B	1254.27	0.252867	0.0658361	3.84086	0.000122604	0.00204028
C14orf1	1656.13	-0.251771	0.0655581	-3.84042	0.000122822	0.00204184
APLP1	24402.5	-0.195104	0.0508076	-3.84005	0.000123009	0.00204287
MIDN	5855.99	0.202177	0.0526552	3.83964	0.000123215	0.00204422
CACNG3	415.106	-1.39069	0.36228	-3.83871	0.000123681	0.00204987
MPV17L2	299.815	-0.461245	0.120193	-3.83752	0.000124282	0.00205775
PITHD1	3536	-0.170204	0.0443595	-3.83692	0.000124587	0.00206072
FN1	2430.23	-1.53939	0.401334	-3.83568	0.000125218	0.00206906
GTF2IP1	636.255	0.375727	0.0980176	3.83326	0.000126458	0.00208746
CEP135	438.476	0.590672	0.15415	3.83179	0.000127215	0.00209784
TOB1	1675.44	-0.258121	0.0673864	-3.83046	0.000127902	0.00209874
MRPS12	680.418	-0.229815	0.0599879	-3.83102	0.000127614	0.00209874
EHD3	1168.28	-0.319284	0.0833543	-3.83045	0.000127911	0.00209874
KIAA1143	3036.94	0.286059	0.074674	3.83077	0.000127742	0.00209874
CUL1	3368.64	0.238255	0.0621892	3.83113	0.000127554	0.00209874
CPEB1	340.17	-0.68878	0.179864	-3.82944	0.000128434	0.00210521
DDC	35.3658	-2.31175	0.603725	-3.82914	0.00012859	0.00210566
TMEM255B	44.6418	-1.38103	0.360738	-3.82834	0.000129009	0.00211041
KISS1R	292.415	-1.36939	0.357802	-3.82723	0.000129596	0.00211695
ZNF665	187.109	0.337389	0.0881581	3.82709	0.000129667	0.00211695
HSPB6	126.606	-1.18311	0.309195	-3.82643	0.000130015	0.00211841
SH3BP2	2128.79	0.610505	0.159549	3.82643	0.000130013	0.00211841
MGST1	704.175	-1.42291	0.371914	-3.82592	0.000130282	0.00212064
EPHB3	1660.34	-0.771451	0.201806	-3.82275	0.000131974	0.00214605
PCSK9	1591.84	-2.93219	0.767208	-3.8219	0.000132429	0.00214788
UBR2	1350.03	0.257188	0.0672881	3.82219	0.000132273	0.00214788
EVX1	41.3382	-3.63314	0.950635	-3.8218	0.00013248	0.00214788
EGR2	16.0463	-1.41175	0.369426	-3.82148	0.000132653	0.00214856
FLT3	41.0856	-1.36831	0.358146	-3.82055	0.000133154	0.00215455
SFT2D2	106.896	0.437469	0.114536	3.81948	0.000133731	0.00216174
ZGRF1	147.792	0.7463	0.195414	3.81908	0.000133949	0.00216314
SNX27	2613.54	0.397471	0.10412	3.81745	0.000134841	0.00217538
ZNF512	5740.44	0.129091	0.0338207	3.81692	0.000135129	0.00217789
NASP	4803.07	0.285892	0.0749258	3.81567	0.000135814	0.00218677
CORO2B	6896.31	0.411209	0.107798	3.81463	0.000136389	0.00219173
OTUD5	2888.07	-0.30755	0.0806236	-3.81464	0.000136382	0.00219173
RARRES3	16.4666	-1.30562	0.342296	-3.81429	0.000136574	0.00219255
APLN	244.375	-1.03999	0.272694	-3.81378	0.000136858	0.00219496
CSRP1	948.802	-0.446782	0.117159	-3.81348	0.000137024	0.00219547
LARS2	1601.13	-0.397817	0.104363	-3.81184	0.000137933	0.00220788
STAT1	3065.76	-0.283117	0.0742801	-3.81148	0.000138137	0.00220899
DRG2	915.065	-0.283126	0.0743077	-3.81018	0.000138866	0.00221847
RORA	3118.81	-1.60733	0.421949	-3.8093	0.000139358	0.00222061
KLF16	952.326	0.378537	0.0993738	3.80922	0.000139407	0.00222061
SSR4	2404.12	-0.232483	0.0610289	-3.8094	0.000139304	0.00222061
WNT16	33.8372	-2.34182	0.614943	-3.80819	0.000139988	0.0022277
LRIF1	1392.39	-0.288635	0.0758027	-3.80772	0.000140257	0.00222981
HRH1	177.073	-1.26747	0.332912	-3.80721	0.000140543	0.0022322
TBX6	48.5248	0.860652	0.2261	3.80651	0.000140941	0.00223635
RGS4	622.503	-2.34497	0.616312	-3.80484	0.000141898	0.00224718
CNTLN	746.728	0.377075	0.0991003	3.80499	0.00014181	0.00224718
TTYH1	15007.2	-0.756535	0.198856	-3.80444	0.000142127	0.00224863
CCDC144NL.AS1	181.405	-0.527648	0.138719	-3.80372	0.000142538	0.00225296
UBP1	2070.7	0.408712	0.107499	3.80202	0.000143521	0.00226631
HDAC7	906.242	0.380427	0.100071	3.80158	0.000143778	0.00226818
LOC101927359	115.493	-1.26373	0.332626	-3.79926	0.000145127	0.00228725
TLL1	646.176	-2.20074	0.579327	-3.79879	0.000145403	0.0022894
ARGLU1	1223.06	0.632617	0.166606	3.79708	0.00014641	0.00230303
GFRA1	1214.39	-1.52646	0.402099	-3.79624	0.000146908	0.00230865
TAF1	3137.95	0.202562	0.0533625	3.79596	0.000147071	0.00230901
VAMP1	177.753	-0.845221	0.222774	-3.79407	0.000148195	0.0023222
GUSBP1	630.228	0.647728	0.170715	3.79421	0.000148115	0.0023222
FAM161B	1557.13	-0.283861	0.0748228	-3.79378	0.000148369	0.0023227
BRINP1	2799.46	0.42643	0.112542	3.78908	0.000151208	0.00236488
CBFB	1196.03	0.315471	0.0832777	3.78818	0.000151753	0.00237114
GPR153	2780.4	0.257904	0.0681001	3.78713	0.000152398	0.00237669
VAT1	8501.21	-0.389586	0.102866	-3.78732	0.000152279	0.00237669
PRPSAP1	2134.26	0.2049	0.0541104	3.7867	0.000152659	0.00237849
CST3	4027.56	-0.413917	0.10932	-3.78628	0.000152917	0.00238025
GREB1L	595.214	-3.11903	0.82414	-3.78458	0.000153967	0.00239431
SETBP1	5203.16	0.416635	0.110126	3.78327	0.000154784	0.00240003
THNSL2	234.491	-2.20769	0.58353	-3.78334	0.00015474	0.00240003
LYPD1	865.145	-1.17585	0.310765	-3.78374	0.000154491	0.00240003
DOLPP1	1025	-0.207415	0.0548276	-3.78305	0.000154921	0.00240003
CTXN3	16.1371	-2.48346	0.656658	-3.78196	0.000155596	0.0024082
TIMM10	623.721	-0.267746	0.0708211	-3.7806	0.000156453	0.00241919
ZNF502	406.219	-0.684446	0.181136	-3.77863	0.000157696	0.00243382
EBAG9	789.627	0.192283	0.0508851	3.77877	0.000157608	0.00243382
CNPY1	241.976	-1.9691	0.521373	-3.77675	0.000158886	0.00244987
HAX1	1995.84	-0.177777	0.04708	-3.77606	0.000159326	0.00245203
HLCS	1058.67	0.234108	0.0619965	3.77616	0.000159267	0.00245203
AMIGO2	553.762	-0.448629	0.118929	-3.77224	0.000161786	0.00248755
KHDRBS1	17303.9	0.143199	0.0379726	3.7711	0.000162529	0.00249663
RPGRIP1L	765.73	0.261451	0.0693442	3.77034	0.000163028	0.00250196
MRPS10	1086.56	-0.189377	0.0502483	-3.76882	0.000164023	0.00251486
MAP4K5	1607.22	0.414031	0.109883	3.76792	0.000164612	0.00252003
TMEM87A	2285.94	-0.2966	0.0787188	-3.76784	0.000164668	0.00252003
COL25A1	1450.39	1.14331	0.303472	3.76744	0.00016493	0.00252168
FAM72C	20.0003	-1.17681	0.312472	-3.76614	0.000165793	0.00253252
NDUFA12	1599.46	-0.254996	0.0677708	-3.76262	0.000168146	0.00256607
C1orf145	132.426	0.560037	0.148875	3.7618	0.000168696	0.00257206
C11orf71	521.762	0.258883	0.068833	3.76102	0.000169219	0.00257764
XYLT1	1381.81	-0.358641	0.095364	-3.76076	0.000169398	0.00257797
LINC01535	44.3619	-1.46247	0.388914	-3.76038	0.000169652	0.00257944
HBQ1	121.752	0.773302	0.205795	3.75764	0.000171522	0.00260545
PRPF4	2277.89	-0.164827	0.0438755	-3.7567	0.00017217	0.00261287
TRPC3	981.149	-1.18244	0.314775	-3.75646	0.000172334	0.00261293
SREK1IP1	1763.91	0.19752	0.0526094	3.75447	0.000173711	0.00263137
LITAF	2399.04	-0.68963	0.183726	-3.75357	0.000174333	0.00263836
TTF1	1106.93	0.197983	0.0527535	3.75298	0.000174746	0.00264217
LINC01315	185.813	0.571616	0.152321	3.7527	0.000174942	0.0026427
ACOT13	936.121	-0.212974	0.0567818	-3.75074	0.00017631	0.0026609
SENP2	1562.03	0.15905	0.0424088	3.7504	0.000176556	0.00266216
NBPF14	182.862	0.894683	0.238642	3.74906	0.000177502	0.00267396
AKAP9	6087.85	0.459803	0.122659	3.74863	0.000177805	0.00267606
SUZ12P1	455.089	0.443087	0.118247	3.74714	0.000178865	0.00268861
ESCO1	868.065	0.329044	0.0878209	3.74676	0.000179131	0.00268861
CPOX	807.942	-0.1778	0.0474535	-3.74682	0.000179088	0.00268861
PAX7	373.386	-2.9699	0.792771	-3.74623	0.000179512	0.0026908
CCDC66	286.435	0.403579	0.107734	3.74608	0.000179618	0.0026908
KLF15	285.776	-0.620453	0.165637	-3.74587	0.00017977	0.0026908
BRWD3	1649.16	0.404201	0.10793	3.74504	0.000180369	0.00269729
GNG3	2501.7	-0.62216	0.166174	-3.74402	0.000181096	0.00270465
NOMO1	3636.38	-0.300839	0.0803547	-3.74389	0.000181191	0.00270465
PDIA3P1	124.652	0.424201	0.113327	3.74316	0.000181719	0.00270759
UNC5C	4445.77	-2.66042	0.710734	-3.7432	0.000181693	0.00270759
DDN	1657.14	0.461141	0.12325	3.74152	0.000182913	0.00272291
NHLRC1	56.8445	-1.03323	0.276224	-3.74057	0.000183607	0.00273075
CDH15	111.341	-2.47988	0.663078	-3.73995	0.000184056	0.00273495
UBA6.AS1	829.026	0.394626	0.105524	3.73967	0.000184261	0.00273552
SFMBT2	1093.13	-0.758229	0.202776	-3.73925	0.00018457	0.00273762
ZNRD1.AS1	92.241	0.403112	0.107885	3.73649	0.000186606	0.00276531
PDP2	992.189	-0.265886	0.0711668	-3.73609	0.000186902	0.0027672
KMT2C	4569.21	0.528519	0.141475	3.73578	0.000187132	0.0027681
GLRA3	53.5663	-1.89266	0.506764	-3.73479	0.00018787	0.0027765
PNISR	2246.9	0.363249	0.0972678	3.73452	0.00018807	0.00277696
LINC01280	11.0956	-1.42873	0.382686	-3.73341	0.000188904	0.00278676
MBD4	734.094	0.342097	0.0916438	3.73289	0.000189292	0.00278996
SLC7A1	4060.74	-0.196912	0.0527829	-3.73061	0.000191017	0.00281068
IBTK	3269.56	0.122912	0.0329471	3.73058	0.000191041	0.00281068
SLC2A8	563.102	-0.239384	0.0642326	-3.72683	0.000193904	0.00285025
UPF2	1797.93	0.209184	0.056141	3.72604	0.000194509	0.00285402
CCDC91	1163.44	0.24024	0.0644729	3.72621	0.000194381	0.00285402
CA10	273.073	-1.7902	0.480581	-3.72507	0.00019526	0.00286023
ZNF546	268.187	0.413805	0.111087	3.72504	0.000195281	0.00286023
OAS3	59.4679	-1.35624	0.364136	-3.72453	0.000195676	0.00286345
DDX42	6754.6	0.124449	0.0334286	3.72285	0.000196988	0.00288007
PRMT8	809.813	-0.88176	0.23687	-3.72255	0.000197224	0.00288095
ZNF215	365.587	-0.941886	0.253144	-3.72075	0.00019863	0.00289725
CYC1	3595.53	-0.249865	0.0671559	-3.72067	0.000198694	0.00289725
ATP6V0C	9678.68	-0.340737	0.0915874	-3.72035	0.000198949	0.00289796
PLA2G7	27.5754	-2.3046	0.619489	-3.72016	0.000199097	0.00289796
ZC3H11A	3248.34	0.350136	0.0941471	3.71903	0.000199989	0.00290578
CDC14B	380.992	0.411767	0.110715	3.71916	0.000199886	0.00290578
RHCE	103.147	-0.510975	0.13741	-3.71862	0.000200313	0.00290791
CEACAM21	96.0424	-2.48924	0.669448	-3.71834	0.000200534	0.00290854
PCDHGB6	9007.47	0.6779	0.182354	3.71748	0.000201216	0.00291586
ANKRD12	7333.31	0.226076	0.0608252	3.71682	0.000201748	0.00292097
PHPT1	3251.87	-0.28816	0.0775609	-3.71528	0.000202983	0.00293626
IGSF1	250.506	-0.803348	0.216287	-3.71427	0.000203793	0.00294538
GLYCTK	126.267	-1.09539	0.294948	-3.71383	0.000204143	0.00294784
STARD8	114.699	-1.11679	0.300767	-3.71314	0.000204702	0.0029533
FGF5	281.3	-3.06001	0.824178	-3.7128	0.000204978	0.00295468
ATP1A3	29999.9	-0.273508	0.0736841	-3.7119	0.00020571	0.00296239
PAX5	149.433	-3.06769	0.826493	-3.7117	0.000205875	0.00296239
EVX2	100.513	-4.06317	1.09498	-3.71074	0.000206653	0.00297011
CAMK2N2	2275.59	-1.15974	0.312548	-3.71059	0.000206774	0.00297011
C11orf84	1024.8	0.246443	0.0664515	3.70861	0.000208401	0.00299086
C11orf54	936.639	0.322558	0.0870142	3.70696	0.000209763	0.00300776
CADM1	8734.86	0.204285	0.0551193	3.70623	0.000210369	0.00301381
TRPV1	161.955	0.687601	0.185563	3.70548	0.000210989	0.00302005
FBXL19.AS1	53.1718	0.816844	0.220559	3.70352	0.000212631	0.00303873
SQSTM1	7960.23	-0.351356	0.0948719	-3.70348	0.000212665	0.00303873
UBE2E2	1369.94	-0.922563	0.249185	-3.70232	0.000213638	0.00304997
SLC30A1	584.133	-0.499751	0.135041	-3.70072	0.000214989	0.00306513
NEIL1	160.57	1.05959	0.286348	3.70037	0.000215285	0.00306513
BHLHE40	1937.86	-0.592442	0.160098	-3.70049	0.000215182	0.00306513
WHSC1L1	6421.03	0.269458	0.0728229	3.70018	0.000215448	0.00306513
NOP14	786.766	0.202723	0.0548134	3.69841	0.000216952	0.00308384
BTBD11	831.692	-1.7701	0.479005	-3.69537	0.000219569	0.00311833
SSBP3	6513.38	0.263011	0.0712018	3.69389	0.000220854	0.00312304
CACNA1H	6228.22	0.528214	0.14298	3.69432	0.00022048	0.00312304
METTL21A	566.722	0.323082	0.0874554	3.69425	0.000220534	0.00312304
VEGFA	12839.7	-0.436879	0.118271	-3.69389	0.000220852	0.00312304
WISP1	14.1055	-1.92163	0.520126	-3.69454	0.000220284	0.00312304
N4BP1	1872.83	0.200491	0.0542996	3.69231	0.000222226	0.00313974
ZSWIM7	226.193	0.420679	0.113969	3.69117	0.000223221	0.00315107
MAN1A1	633.191	-1.5852	0.42949	-3.69089	0.000223473	0.00315191
XRRA1	346.369	-0.282772	0.0766881	-3.6873	0.00022665	0.00319397
ZNF852	67.2428	0.713081	0.193488	3.68541	0.000228333	0.00321492
USP24	4498.47	0.203022	0.055096	3.68488	0.000228809	0.00321885
UAP1	1509.74	0.164364	0.044615	3.68405	0.00022956	0.00322665
STAB1	16.3221	3.61282	0.980837	3.6834	0.000230141	0.00323204
TNPO2	17171.5	-0.172265	0.0467982	-3.68103	0.000232298	0.00325954
ZNF565	202.693	0.392682	0.106708	3.67998	0.000233255	0.00327017
OCRL	4380.53	-0.29984	0.0815002	-3.67902	0.000234136	0.0032797
CX3CL1	1319.32	-1.09804	0.298522	-3.67825	0.000234836	0.00328594
ZNF146	4347.35	0.227875	0.0619546	3.67809	0.000234983	0.00328594
HLA.A	5641.04	-0.53088	0.144371	-3.6772	0.000235811	0.00329472
DPH7	601.676	0.299251	0.0814098	3.67587	0.000237043	0.00330911
SPOCK2	16366.8	-1.26348	0.343887	-3.67411	0.000238681	0.0033263
EDN3	26.4968	-2.8182	0.767008	-3.67428	0.000238521	0.0033263
ARHGEF33	190.515	-1.55871	0.424268	-3.67389	0.000238888	0.00332636
CHPF	10773	-0.612961	0.166881	-3.67305	0.000239675	0.00333447
COL4A2	5794.51	-0.448888	0.122219	-3.6728	0.000239903	0.00333481
ZNF780B	554.473	0.437256	0.119063	3.67249	0.000240199	0.0033361
SRF	1740.68	0.263536	0.0718237	3.66921	0.000243301	0.00337631
REV1	1318.82	0.363514	0.0990863	3.66866	0.000243823	0.0033807
ZCCHC14	4240.07	0.20299	0.0553383	3.66817	0.000244294	0.00338436
FIRRE	101.153	0.540598	0.147432	3.66677	0.000245632	0.00340002
LINGO3	497.518	-1.11319	0.303655	-3.66597	0.000246398	0.00340774
HIPK3	2587.78	-0.15536	0.0423824	-3.66569	0.000246677	0.00340872
SESN2	2612.35	-0.305898	0.0834784	-3.6644	0.000247919	0.00342012
B4GALNT4	5623.92	0.19672	0.0536814	3.6646	0.00024773	0.00342012
IRF2BP2	9014.96	-0.305054	0.0832636	-3.66372	0.000248583	0.00342639
MUS81	1174.23	0.278865	0.0761346	3.66279	0.000249482	0.00343299
SLC27A5	212.471	-0.439882	0.120093	-3.66284	0.000249438	0.00343299
ARHGAP36	9.19175	-2.51151	0.685724	-3.66257	0.0002497	0.00343311
NPHP3	50.9291	0.699501	0.191029	3.66175	0.000250495	0.00343539
BDP1	2597.63	0.644787	0.176068	3.66214	0.000250114	0.00343539
ATP6AP2	7845.75	-0.334079	0.0912312	-3.66189	0.000250363	0.00343539
ILDR2	1697.73	-1.33768	0.365395	-3.66091	0.00025132	0.00344382
ZNF555	1000.53	0.352998	0.096441	3.66025	0.00025197	0.00344984
FBXO21	7486.69	-0.195996	0.0535978	-3.65678	0.000255401	0.00349098
LINC01047	24.0602	-2.25951	0.617883	-3.65686	0.000255323	0.00349098
MGP	701.62	-2.83964	0.776621	-3.6564	0.000255786	0.00349332
PSMD11	2932.37	0.168395	0.0460632	3.65573	0.00025645	0.00349947
CHL1	6528.4	-2.31447	0.633209	-3.65515	0.000257033	0.00350452
ZNF570	356.221	0.352271	0.0964039	3.65411	0.000258074	0.00351578
ZNF280B	294.158	0.424409	0.116224	3.65166	0.000260553	0.0035466
TAF11	1218.79	0.137586	0.0376873	3.65074	0.000261486	0.00355633
DUSP5	854.592	0.660683	0.181012	3.64994	0.000262302	0.00356448
MEIS3	4344.03	0.338882	0.0928848	3.64841	0.000263864	0.00358273
AKAP5	372.731	0.690444	0.189262	3.64808	0.000264205	0.00358439
MIPOL1	220.708	0.39525	0.108354	3.64777	0.000264523	0.00358573
ZNF418	431.565	0.577087	0.158351	3.64436	0.000268062	0.0036307
MARVELD1	1048.55	0.562159	0.154269	3.64401	0.000268422	0.00363257
SOS2	1872.55	0.20779	0.0570439	3.64263	0.000269864	0.00364906
ACTA2	177.644	-1.10758	0.304085	-3.64232	0.000270188	0.00364976
ZCCHC12	3814.41	-1.1156	0.306303	-3.64216	0.000270361	0.00364976
WDPCP	320.463	0.279807	0.0768708	3.63997	0.000272675	0.00367796
ANKRD11	6320.65	0.27572	0.0757643	3.63918	0.000273508	0.00368617
SYNJ2BP	1200.86	0.355399	0.0976985	3.63771	0.000275074	0.00370119
TSEN2	355.958	0.378248	0.103979	3.63775	0.000275035	0.00370119
DHRS11	414.225	-0.321797	0.0884773	-3.63706	0.000275765	0.00370743
GLI3	2413.59	0.546288	0.150213	3.63675	0.000276098	0.00370886
SOX10	19.8704	-2.36966	0.651688	-3.63618	0.000276709	0.00371402
B2M	2448	-0.40131	0.110424	-3.63425	0.000278787	0.00373885
FOLR1	104.72	-1.04728	0.288498	-3.6301	0.000283315	0.00378895
ZNF740	1699.38	0.241603	0.0665579	3.62998	0.000283448	0.00378895
CYP26B1	5298.59	-1.45565	0.400982	-3.63021	0.000283195	0.00378895
DNAJB9	2084.27	-0.258207	0.0711226	-3.63045	0.000282926	0.00378895
EFNB2	10593.4	0.926482	0.255364	3.62808	0.000285532	0.00381369
ZNF644	4028.42	0.13939	0.0384271	3.62737	0.000286318	0.00381582
LHX5.AS1	46.2037	-1.69245	0.466552	-3.62757	0.000286103	0.00381582
BPGM	1050.42	-0.183295	0.050532	-3.62731	0.00028639	0.00381582
ZNF462	3123.78	0.357294	0.0985492	3.62554	0.000288361	0.00383895
DSEL	1446.18	1.01506	0.280077	3.62423	0.000289819	0.00384897
ZNF573	131.232	0.641072	0.176881	3.62432	0.000289719	0.00384897
PPP1R12C	1092.36	0.317842	0.0876977	3.62429	0.000289757	0.00384897
TAF4B	197.901	-1.2436	0.343157	-3.624	0.000290083	0.00384936
SYPL2	23.3522	-2.29995	0.634753	-3.62338	0.000290778	0.00385245
SMPD4	2083.55	0.134202	0.037038	3.62337	0.000290786	0.00385245
DBP	1555.21	-0.321881	0.0888471	-3.62286	0.00029136	0.00385693
TTLL1	959.936	0.195928	0.0541071	3.62111	0.000293343	0.0038769
GRM7	364.739	-0.641074	0.177034	-3.6212	0.00029324	0.0038769
MORF4L2	13780.5	-0.122112	0.0337328	-3.61999	0.000294614	0.00389056
NPTX2	2084.15	-1.80922	0.499858	-3.61946	0.000295214	0.00389535
SYNPO2	122.817	-1.56603	0.432813	-3.61826	0.000296589	0.00391034
TES	234.566	-0.781076	0.215959	-3.61678	0.000298291	0.00392962
CASC4	5482.05	0.187869	0.0519658	3.61524	0.000300066	0.00394983
PELP1	5121.34	-0.166307	0.0460074	-3.61479	0.000300587	0.0039535
MGAT4C	436.253	-0.621086	0.171842	-3.61428	0.000301187	0.00395508
DTD2	1035.19	0.277201	0.0766977	3.6142	0.00030128	0.00395508
LRFN5	1257.88	-0.731242	0.202344	-3.61386	0.000301673	0.00395508
IQSEC2	2341.12	0.444216	0.122914	3.61406	0.000301444	0.00395508
RPL9	26675.3	-0.250052	0.0692228	-3.61228	0.000303521	0.00397613
DNAJC9	1276.32	0.179956	0.049828	3.61154	0.000304385	0.00398425
DDAH1	7052.9	-0.78565	0.217591	-3.61067	0.000305407	0.00398807
FIGN	453.436	-1.4458	0.400404	-3.61086	0.000305189	0.00398807
DHFRL1	609.365	0.339203	0.0939366	3.61098	0.000305046	0.00398807
POLR3GL	1020.3	0.399503	0.110676	3.60966	0.000306595	0.00399721
PANX2	850.502	-0.165894	0.0459562	-3.60982	0.000306409	0.00399721
HIF3A	671.287	0.504933	0.139894	3.60939	0.000306915	0.0039981
GALNT13	1089.47	0.469191	0.129999	3.60919	0.000307152	0.0039981
EGFLAM	38.4086	-1.87846	0.520524	-3.6088	0.000307621	0.00399885
ATP6AP1	7724.65	-0.315218	0.0873488	-3.60873	0.000307698	0.00399885
ZDHHC8P1	240.317	1.0723	0.297199	3.60801	0.00030856	0.00400687
KCTD21	428.057	-0.253975	0.0704273	-3.6062	0.000310718	0.00402586
WDR73	787.851	0.454367	0.125998	3.60616	0.00031076	0.00402586
IGF2BP1	1183.5	0.297581	0.0825194	3.6062	0.000310718	0.00402586
HPS1	898.629	0.223848	0.0620783	3.6059	0.000311078	0.00402681
TMTC1	965.803	0.773543	0.214542	3.60556	0.00031148	0.00402882
GOLGA4	3286.22	0.517289	0.1435	3.6048	0.000312393	0.00403623
KIAA2018	1469.07	0.458405	0.12717	3.60467	0.000312546	0.00403623
UBE2G2	2381.55	0.362838	0.100683	3.60375	0.000313656	0.00404738
RBFA	582.653	0.553032	0.153499	3.60284	0.000314757	0.00405151
ZNF574	1677.05	-0.160598	0.0445744	-3.60292	0.00031466	0.00405151
RPS19BP1	1249.26	-0.267496	0.0742424	-3.603	0.000314562	0.00405151
ATP6V1F	4954.63	-0.162823	0.0451952	-3.60267	0.000314966	0.00405151
PSD3	9878.05	0.788203	0.21881	3.60222	0.000315511	0.00405533
RNA45S5	34.6849	-0.712498	0.197863	-3.60097	0.000317032	0.00407169
HELB	60.2078	0.983718	0.273215	3.60053	0.000317572	0.00407543
ANKDD1A	394.22	0.318669	0.0885358	3.59932	0.000319045	0.00409113
ENOX1	898.13	0.354138	0.0984746	3.59624	0.000322851	0.00413669
PHF12	2809.32	0.191828	0.0533597	3.59499	0.000324402	0.00415331
SEC61A1	13809.6	-0.224594	0.0624846	-3.5944	0.000325144	0.00415955
ARHGAP29	256.276	-1.12216	0.312302	-3.59318	0.000326669	0.0041758
SPAG9	10560.2	0.130257	0.0362585	3.59245	0.000327578	0.00418238
MED14	2787.94	0.349084	0.097174	3.59236	0.000327694	0.00418238
MTCH1	9265.83	-0.20565	0.057279	-3.59033	0.00033026	0.00421184
ETS2	842.196	-0.440616	0.122734	-3.59	0.000330681	0.00421364
ASB6	1427.8	-0.210472	0.0586304	-3.58981	0.000330915	0.00421364
KAT6B	5170.39	0.395333	0.110237	3.58621	0.000335517	0.0042656
TSPAN11	3204.61	-0.96361	0.268694	-3.58628	0.000335432	0.0042656
MAVS	1971.4	0.414678	0.115656	3.58544	0.000336511	0.00427492
ARL8B	3604.19	-0.15826	0.0441586	-3.5839	0.000338499	0.00429022
GUSBP3	14.7865	1.44755	0.403898	3.58395	0.00033844	0.00429022
CCDC136	2408.97	0.208441	0.0581605	3.5839	0.000338501	0.00429022
CACNB3	3468.3	0.18162	0.0506885	3.58306	0.000339593	0.00430072
GPR75	54.2729	0.766103	0.213863	3.58222	0.000340692	0.00430798
EGFR	1580.16	-1.30968	0.365591	-3.58237	0.000340485	0.00430798
PTBP2	3650.65	0.204281	0.0570473	3.58091	0.000342399	0.00431171
BRINP3	1108.81	-1.19436	0.333488	-3.5814	0.000341755	0.00431171
ZNF682	577.782	0.436932	0.122021	3.58078	0.000342567	0.00431171
EIF2AK2	1244.9	0.246845	0.0689217	3.58152	0.000341599	0.00431171
SLC9A3	154.895	-0.423	0.118115	-3.58126	0.000341937	0.00431171
PRELID1	1025.9	-0.216051	0.0603354	-3.58084	0.000342494	0.00431171
EAF2	66.7501	-0.605259	0.169052	-3.58031	0.000343189	0.00431622
SNRPA1	1401.51	0.306675	0.0856696	3.57973	0.000343943	0.00432111
DERL1	3225.48	-0.259046	0.0723671	-3.57961	0.000344105	0.00432111
POLR2G	2433.92	-0.149993	0.0419258	-3.57757	0.000346798	0.00435159
INTS10	1785.6	0.316224	0.0884417	3.57551	0.000349547	0.00438271
EHD2	643.909	-0.477498	0.133561	-3.57514	0.000350036	0.00438549
LRRTM4	970.445	0.818337	0.228909	3.57494	0.000350304	0.0043855
ST8SIA6	50.368	-1.58575	0.443621	-3.57456	0.000350813	0.00438852
DDIT4L	330.403	-1.30814	0.366029	-3.57388	0.000351729	0.00439661
SSBP2	5978.38	0.722612	0.202244	3.57298	0.000352943	0.00440842
GON4L	2131.69	0.193086	0.0540577	3.57186	0.000354458	0.00442397
NDRG2	4579.29	-0.612439	0.171501	-3.57106	0.000355544	0.00442404
FDXR	659.609	-0.340841	0.0954354	-3.57143	0.000355038	0.00442404
PLSCR5	26.5209	-2.62894	0.736177	-3.57107	0.000355521	0.00442404
SH2D4A	37.3946	0.682021	0.190965	3.57145	0.000355006	0.00442404
AIM1L	36.603	-0.740885	0.207555	-3.56958	0.000357553	0.00444266
ST8SIA4	1287.63	-0.572574	0.160405	-3.56956	0.000357583	0.00444266
KIAA0226L	52.0217	-0.789442	0.221245	-3.56818	0.000359464	0.00446069
ANKH	1812.99	0.644649	0.18067	3.5681	0.000359579	0.00446069
TEX264	900.793	-0.27048	0.0758166	-3.56756	0.000360321	0.00446651
AP2S1	2535.76	-0.150422	0.0421736	-3.56672	0.000361471	0.00447737
ATP11B	1534.8	0.291596	0.0817673	3.56617	0.000362241	0.00448014
TMEM71	76.8383	-2.214	0.620823	-3.56624	0.000362146	0.00448014
MVK	682.64	-0.286437	0.0803476	-3.56497	0.0003639	0.00448142
LRCH1	1517.15	0.630175	0.176819	3.56395	0.000365315	0.00448142
SLITRK5	2377.06	-1.01423	0.284556	-3.56427	0.000364875	0.00448142
SLC5A2	29.042	-1.09411	0.306912	-3.5649	0.000363995	0.00448142
ALOXE3	60.7023	-0.755472	0.21194	-3.56456	0.000364468	0.00448142
HKR1	802.523	0.351568	0.0986237	3.56474	0.000364216	0.00448142
RINL	122.292	0.540626	0.151682	3.56421	0.00036495	0.00448142
PREB	1754.4	-0.179022	0.0502157	-3.56506	0.000363767	0.00448142
CYP20A1	481.91	0.275461	0.0772523	3.56574	0.000362836	0.00448142
CHST2	2252.77	-0.591487	0.165931	-3.56465	0.000364335	0.00448142
LINC00889	142.406	0.614536	0.172433	3.56392	0.000365356	0.00448142
DNAJA4	154.96	-0.70138	0.196835	-3.56329	0.000366242	0.00448893
SFXN3	2429.57	0.478919	0.134469	3.56156	0.000368662	0.00451521
BTBD9	1695.18	-0.297884	0.083651	-3.56103	0.0003694	0.00452087
GSN	5719.54	-1.16732	0.327932	-3.55965	0.000371352	0.00454137
SLC12A5	1409.59	-1.03225	0.290039	-3.55899	0.000372286	0.004546
NIPSNAP1	9126.51	0.203471	0.0571707	3.55901	0.000372251	0.004546
CCDC82	1385	0.392473	0.110316	3.5577	0.000374117	0.00455497
PAXBP1	732.729	0.589535	0.165699	3.55788	0.00037386	0.00455497
SLC4A4	3340.76	-1.05734	0.2972	-3.55769	0.000374134	0.00455497
SMIM10L2B	695.781	-0.385034	0.10822	-3.55789	0.00037384	0.00455497
UNCX	1059.6	-2.16836	0.609715	-3.55635	0.000376039	0.00457476
IL1RAPL2	93.9436	-1.95096	0.548655	-3.5559	0.000376687	0.00457925
TNS2	444.04	0.777017	0.21855	3.55532	0.000377516	0.00458593
ICK	2056.58	0.287742	0.0809544	3.55438	0.000378878	0.00459905
GUCA1B	108.781	-0.994068	0.279745	-3.55348	0.000380169	0.00461131
ZNF8	469.728	0.482198	0.13574	3.55238	0.000381768	0.00462728
HNRNPUL2	3286.96	0.199632	0.0562025	3.55202	0.000382291	0.00463019
SEMA5B	4033.14	-0.370452	0.104311	-3.55143	0.000383148	0.00463714
FAM118A	618.884	0.549522	0.15489	3.54781	0.000388447	0.0046978
ORC3	1800.62	-0.193698	0.0546252	-3.54594	0.000391213	0.00472776
TMEM254.AS1	221.099	0.439393	0.12397	3.54435	0.000393586	0.00475293
ANKRD29	91.0796	-0.90804	0.256329	-3.54248	0.000396381	0.00478315
TTN	402.747	0.370678	0.104651	3.54203	0.000397058	0.0047878
KLRAP1	49.8153	0.639878	0.180738	3.54037	0.000399572	0.00481456
ZNF552	110.13	0.399417	0.112864	3.53891	0.00040178	0.0048376
CYP21A2	6.79996	-2.01881	0.570774	-3.53698	0.000404736	0.00486962
SP2.AS1	78.7242	0.695942	0.196815	3.53603	0.00040619	0.00488353
PWAR5	428.256	0.491057	0.138888	3.53565	0.000406779	0.00488701
VAT1L	5740.84	-0.941377	0.266451	-3.53302	0.000410841	0.0049322
S100A6	267.891	-0.967811	0.273948	-3.53282	0.000411145	0.00493223
NLRP2	379.56	3.06834	0.869514	3.5288	0.000417441	0.0050041
ZNF347	437.908	0.284056	0.080519	3.52781	0.000419005	0.0050155
ZNF346	1178.52	0.162475	0.0460541	3.52791	0.000418859	0.0050155
NUDT15	555.315	-0.279858	0.0793695	-3.52602	0.000421856	0.00504594
POLR1D	3351.25	0.204946	0.0581274	3.5258	0.000422199	0.00504636
MPHOSPH9	374.35	0.375589	0.106544	3.5252	0.000423157	0.00505411
FHOD3	3094.49	0.503937	0.142961	3.525	0.000423485	0.00505435
PLCB3	1115.12	0.304676	0.0864644	3.52372	0.000425538	0.00507516
WDR44	1486.81	-0.253453	0.0719534	-3.52246	0.000427562	0.00509558
TTC14	468.067	0.663342	0.188377	3.52135	0.000429349	0.00511315
LEPROTL1	3180.23	0.201971	0.0573593	3.52115	0.000429682	0.0051134
ZNF488	378.464	-0.652958	0.185573	-3.51861	0.000433809	0.00514962
SYT12	393.976	-0.829875	0.235853	-3.5186	0.000433825	0.00514962
MLLT6	3205.37	0.294392	0.0836696	3.51851	0.000433984	0.00514962
ZNF480	837.175	0.346567	0.0984916	3.51875	0.000433581	0.00514962
PAXBP1.AS1	265.552	0.333304	0.0947351	3.51827	0.000434372	0.0051505
TUSC1	794.809	0.776651	0.220787	3.51764	0.0004354	0.00515896
FAM189B	876.803	0.25871	0.0735788	3.51609	0.000437945	0.00518536
CERS5	1348.25	0.211093	0.0600505	3.51526	0.000439317	0.00519785
AGBL4	35.3619	-1.04408	0.297049	-3.51484	0.000440018	0.00519863
MRPL39	647.405	-0.20492	0.0583	-3.51492	0.000439879	0.00519863
CD9	2729.63	-0.984585	0.280174	-3.51419	0.000441094	0.00520378
MYH15	111.232	-1.45774	0.414838	-3.514	0.000441408	0.00520378
PCSK1N	9633.2	-0.357878	0.101834	-3.51433	0.000440859	0.00520378
SPNS1	2191.15	-0.359334	0.10228	-3.51322	0.000442712	0.0052154
SHROOM2	2945.15	-1.09097	0.310594	-3.51254	0.000443844	0.00522498
RYR3	460.617	0.803585	0.228792	3.5123	0.000444252	0.00522603
ANAPC11	2843	-0.23369	0.06654	-3.51203	0.000444702	0.00522756
TRAF3IP2.AS1	1116.07	0.38129	0.108584	3.51147	0.000445628	0.00523469
CNRIP1	2219.19	-0.543452	0.154799	-3.51069	0.000446944	0.00524639
DAZL	14.6806	-1.53409	0.437001	-3.51049	0.000447287	0.00524666
ATP6V1A	9943.2	-0.170435	0.0485641	-3.50949	0.000448965	0.00526257
ASCC3	2967.55	-0.201091	0.0573196	-3.50824	0.000451077	0.00527977
PLEKHA8	2074.84	0.275954	0.0786565	3.50834	0.000450913	0.00527977
LINC01124	19.1019	-2.28597	0.651655	-3.50794	0.000451598	0.00528208
SGTA	7081.44	-0.121174	0.0345528	-3.50691	0.00045335	0.00529879
LAMTOR1	2036.36	-0.239364	0.0682627	-3.50652	0.00045401	0.00530272
SHARPIN	1074.79	0.434893	0.124055	3.50566	0.000455478	0.00531607
LOC102724596	21.4589	0.763358	0.217776	3.50524	0.000456188	0.00532057
LIMD1	412.073	0.412871	0.117818	3.5043	0.000457805	0.00533562
GLCCI1	2791.72	0.899089	0.256604	3.5038	0.000458664	0.00534183
C14orf132	19647.8	-0.285379	0.0814696	-3.50289	0.000460235	0.00535252
CYB5A	684.146	-0.187337	0.0534804	-3.50291	0.000460208	0.00535252
LUZP2	583.783	-1.4552	0.415496	-3.50233	0.000461202	0.00535616
CHEK1	776.69	0.400654	0.114395	3.50237	0.000461146	0.00535616
MICALL1	1796.77	0.550914	0.157322	3.50181	0.000462103	0.00536282
FAM98C	602.459	-0.197124	0.0562988	-3.50139	0.000462839	0.00536375
SMS	5878.95	0.876176	0.250224	3.50157	0.000462523	0.00536375
XPA	721.736	0.22957	0.0655699	3.50115	0.00046326	0.00536484
AP1M2	13.1552	-2.43289	0.69518	-3.49966	0.000465847	0.00539099
NKTR	853.941	0.861439	0.246272	3.49791	0.000468911	0.00542261
VBP1	4321.44	-0.187565	0.0536411	-3.49666	0.00047112	0.00544431
CREG2	672.848	-0.673049	0.192549	-3.49547	0.000473223	0.00545832
TBC1D5	3732.86	0.133675	0.0382423	3.49547	0.000473229	0.00545832
MBOAT1	78.5659	-0.84263	0.241067	-3.49541	0.000473332	0.00545832
SLC6A8	4765.4	-0.354667	0.101475	-3.49511	0.000473874	0.00546072
ACSL6	1264.86	-0.752782	0.215407	-3.49469	0.000474613	0.00546539
GPSM1	5614.82	0.283399	0.0811141	3.49383	0.000476139	0.00547911
STRIP2	132.318	-1.293	0.370195	-3.49274	0.00047809	0.00549769
SCG2	7025.41	-1.44647	0.41419	-3.49228	0.000478912	0.00550329
C17orf104	53.1854	0.683381	0.195825	3.48975	0.00048347	0.00554788
ADAMTS6	146.216	-0.70106	0.20088	-3.48994	0.000483132	0.00554788
ENTPD4	2474.44	0.265964	0.0762197	3.48944	0.00048404	0.00555053
LINC01420	1526.44	-0.170799	0.0489512	-3.48917	0.000484515	0.00555209
BCAN	11406.6	-0.965273	0.276663	-3.48899	0.000484858	0.00555213
PIGS	1920.1	-0.152933	0.0438599	-3.48685	0.000488738	0.00558881
ZNF490	483.95	0.240317	0.068921	3.48685	0.000488743	0.00558881
C14orf105	37.9701	-2.44878	0.702434	-3.48613	0.000490062	0.00559997
SETD1B	1588.31	0.236057	0.0677657	3.48343	0.000495031	0.00564798
DERL2	1316.08	-0.165204	0.0474277	-3.48329	0.000495298	0.00564798
CITED1	195.736	-0.594134	0.170562	-3.4834	0.000495095	0.00564798
BNC2	123.211	-1.94022	0.557147	-3.48243	0.000496888	0.00566217
RYK	1509.41	0.174999	0.050255	3.48221	0.000497285	0.00566275
ST6GAL1	1562.72	0.318667	0.0915664	3.48018	0.000501082	0.00570203
LRP2	1244.48	-2.29655	0.660088	-3.47916	0.000502997	0.00571588
USP46	2805.46	0.285704	0.0821185	3.47917	0.000502976	0.00571588
NNT.AS1	1192.85	0.17125	0.0492296	3.47859	0.000504063	0.00572402
RPL39L	368.167	0.42988	0.123595	3.47814	0.000504897	0.00572952
SNTB1	409.256	-0.775841	0.223116	-3.4773	0.000506493	0.00574365
CORT	16.5687	1.15527	0.332381	3.47574	0.000509452	0.00577015
FOXB1	63.9451	-2.5188	0.724728	-3.47551	0.000509888	0.00577015
ZNF433	562.68	0.269077	0.0774188	3.47561	0.0005097	0.00577015
ZNF808	211.369	0.358191	0.103092	3.47447	0.000511872	0.00578682
KIF1A	65713.7	-0.1556	0.0447852	-3.47436	0.000512067	0.00578682
SLC3A2	9037.46	-0.255659	0.0735899	-3.47411	0.000512555	0.00578833
NETO1	352.883	-1.27383	0.366689	-3.47387	0.000513015	0.00578954
ISM2	281.023	-0.830737	0.23917	-3.47341	0.000513886	0.00579138
PPARGC1A	1111.36	-0.597658	0.172064	-3.47345	0.000513808	0.00579138
RNF187	16415.6	-0.16903	0.048676	-3.47256	0.000515515	0.00580575
ZNF582.AS1	206.675	-0.64102	0.184606	-3.47238	0.000515869	0.00580575
GSS	1254.2	0.214196	0.0617209	3.47039	0.000519707	0.00584091
ACSL4	6612.29	-0.481829	0.138835	-3.47052	0.000519455	0.00584091
POMP	2250.08	-0.156105	0.044995	-3.46938	0.000521652	0.00585783
GARNL3	1093.02	0.358758	0.103411	3.46924	0.000521929	0.00585783
GRIN1	2634.15	-0.319782	0.0922001	-3.46835	0.000523666	0.0058733
FAM162A	2557.78	-0.558995	0.161253	-3.46657	0.000527142	0.00590825
EMC7	1953.99	-0.205445	0.0592692	-3.4663	0.000527674	0.00591017
ATF7IP	8517.81	0.230384	0.0664776	3.46559	0.000529064	0.00591902
MRPL41	1223.41	-0.219668	0.0633866	-3.46553	0.000529187	0.00591902
TXLNA	1723.78	0.194559	0.0561497	3.46502	0.000530199	0.00592628
ZSCAN2	1257.13	0.274722	0.0793146	3.4637	0.000532807	0.00595138
NEU4	29.6019	-0.759166	0.21928	-3.46209	0.000536006	0.00598302
LHX9	269.041	-1.78006	0.514322	-3.46098	0.000538207	0.00599759
LOC441242	74.3694	0.650317	0.187887	3.46121	0.000537744	0.00599759
USP11	18425.2	-0.171883	0.0496645	-3.46088	0.00053841	0.00599759
SENP7	1186.22	0.347761	0.100514	3.45983	0.00054052	0.00601701
ZWILCH	1112.59	0.27281	0.078856	3.4596	0.000540982	0.00601806
INPP5K	1610.73	-0.186056	0.0538218	-3.45688	0.000546464	0.00607491
RIT2	61.6936	-1.55887	0.450977	-3.45665	0.000546927	0.00607594
MLH3	1122.81	0.246765	0.0714105	3.45559	0.000549095	0.00609588
SGSM2	3081.56	0.29203	0.084538	3.45443	0.000551465	0.00611804
SDC3	20642.3	-0.488436	0.141446	-3.45316	0.00055406	0.00614268
VILL	51.5314	0.901963	0.26129	3.45196	0.000556524	0.00616582
TACR1	94.5519	-1.63337	0.473426	-3.4501	0.000560381	0.00620343
ACHE	1461.42	-0.40961	0.118729	-3.44996	0.000560676	0.00620343
NIPAL2	36.4923	-1.92392	0.557825	-3.44896	0.000562751	0.00622218
FCHO2	927.702	0.262486	0.0761197	3.44833	0.00056406	0.00623245
PLXNB3	438.437	-0.625043	0.181299	-3.44757	0.000565653	0.00624584
NHLRC2	764.723	0.229236	0.0664991	3.44721	0.000566417	0.00624654
MAPK12	469.783	0.415459	0.120522	3.44718	0.00056648	0.00624654
TFDP2	2341.6	0.269973	0.0783275	3.44672	0.000567443	0.00625295
MLST8	1734.14	-0.305462	0.0886929	-3.44404	0.000573088	0.0063109
KLHL17	355.302	0.556081	0.161478	3.4437	0.000573823	0.00631475
LINC00152	38.09	-1.03104	0.299421	-3.44346	0.000574327	0.00631606
ZNF710	2100.93	0.458824	0.133258	3.44312	0.000575043	0.00631968
IER3IP1	1464.88	0.195789	0.0568781	3.44226	0.000576865	0.00633546
CCDC57	169.462	0.656857	0.190844	3.44185	0.000577758	0.00634101
C4orf33	362.455	0.296286	0.0861079	3.44087	0.00057984	0.0063596
IGF2BP2	2455.46	0.443014	0.128771	3.44032	0.000581025	0.00636729
DIAPH1	2273.69	0.183551	0.0533549	3.44018	0.000581319	0.00636729
NDUFB3	766.113	-0.209795	0.0609962	-3.43947	0.000582852	0.00637981
CHDH	245.302	-1.31575	0.382684	-3.43821	0.000585579	0.00640538
MAP1S	4481.54	-0.16266	0.04735	-3.43528	0.000591945	0.00646638
MICA	197.321	-0.494303	0.143884	-3.43543	0.00059161	0.00646638
MTA2	4964.97	0.234099	0.0681505	3.43502	0.000592505	0.00646818
PIANP	2650.54	0.332544	0.0968172	3.43476	0.000593079	0.00647013
MAMSTR	104.326	0.495898	0.1444	3.4342	0.000594296	0.0064791
STC2	4481.55	-0.933867	0.271987	-3.4335	0.000595834	0.00648827
PDSS2	497.591	-0.290352	0.0845654	-3.43346	0.00059593	0.00648827
TIPIN	251.649	0.337553	0.0983548	3.43199	0.00059917	0.00651921
C5orf42	2209.74	0.33342	0.0971672	3.43141	0.00060046	0.0065289
RNF19B	1882.01	-0.236162	0.0688762	-3.42879	0.000606274	0.00658774
SCAP	5720.08	-0.190247	0.0554969	-3.42807	0.000607894	0.00660097
CPT1A	379.2	0.573467	0.167304	3.4277	0.000608715	0.00660551
CEP104	1239.32	0.292168	0.0852551	3.42699	0.000610314	0.00661596
FAM218A	117.031	0.724995	0.211559	3.42691	0.000610487	0.00661596
CYP26A1	225.043	-0.958754	0.279804	-3.42652	0.000611374	0.00661681
VSTM2B	179.654	1.29133	0.376859	3.42657	0.000611259	0.00661681
DFNB31	880.981	0.430591	0.125697	3.42562	0.000613395	0.0066343
JAK1	6910.25	-0.389978	0.113897	-3.42397	0.000617142	0.00667042
CHST9	96.2302	-0.94485	0.275994	-3.42345	0.000618322	0.00667877
SLC30A3	101.448	-1.02787	0.300268	-3.42317	0.000618947	0.00668111
GCFC2	783.694	0.295275	0.0862798	3.42229	0.00062095	0.00669833
ZNF589	727.451	0.300401	0.0877908	3.42178	0.000622117	0.00670209
OGFRL1	777.002	-0.254783	0.0744586	-3.4218	0.000622072	0.00670209
SUSD5	155.415	-1.0412	0.304333	-3.42124	0.000623355	0.00670765
UBXN2B	3347.53	0.411444	0.120263	3.4212	0.000623453	0.00670765
C16orf58	1995.98	-0.180358	0.0527271	-3.4206	0.000624835	0.00670992
RALBP1	2042.25	0.144108	0.0421296	3.42057	0.000624893	0.00670992
ZSCAN23	206.489	0.389001	0.113724	3.42058	0.000624879	0.00670992
CCZ1	656.136	0.589637	0.172489	3.41841	0.000629891	0.00675915
BAIAP3	1277.19	-0.781652	0.228688	-3.41798	0.000630878	0.00676531
GEM	296.791	-0.356548	0.104334	-3.41739	0.000632252	0.0067756
BRPF3	1654.79	0.247207	0.0723952	3.41468	0.00063856	0.00683873
MAT2A	2236.94	0.339523	0.0994393	3.41437	0.000639295	0.00684213
ZNF839	677.146	0.216444	0.0634029	3.41379	0.00064067	0.00684863
NRBP1	4241.19	-0.113471	0.0332392	-3.41376	0.000640739	0.00684863
NOL4L	5501.96	0.288201	0.0844342	3.41332	0.000641772	0.0068552
VPS13B	2626.26	-0.231999	0.0680003	-3.41174	0.000645495	0.00689047
ADAM19	862.382	0.6527	0.191377	3.41055	0.000648327	0.0069162
KDM5C	8635.64	0.26124	0.0766095	3.41002	0.000649576	0.006925
ANGEL1	498.858	0.283269	0.0830789	3.40963	0.000650502	0.00693037
CHTOP	4226.75	-0.12279	0.0360147	-3.40945	0.000650943	0.00693055
AZGP1	12.072	-1.58528	0.465011	-3.40913	0.000651696	0.00693406
TXN2	2336.33	-0.269954	0.0792051	-3.40829	0.00065371	0.00695098
SLC38A9	389.221	0.259967	0.0762851	3.40783	0.00065481	0.00695762
DNLZ	524.814	-0.380282	0.111596	-3.40768	0.000655184	0.00695762
RAB3C	1091.05	-0.703973	0.206596	-3.40749	0.000655623	0.00695776
HCFC1	5733.66	0.245177	0.0719705	3.40664	0.000657686	0.00697513
RBMS1	979.267	-1.33707	0.39259	-3.40575	0.000659824	0.00699328
SEPW1	5413.38	-0.320536	0.0941475	-3.40461	0.000662578	0.00701339
TXLNG	1780.51	0.342255	0.100522	3.40479	0.000662159	0.00701339
GOLGA3	3549.86	0.392845	0.115393	3.40439	0.000663114	0.00701453
ARID3A	202.593	0.401826	0.118053	3.40377	0.000664615	0.00702587
LZTS3	3197.12	-0.287482	0.08447	-3.40336	0.000665622	0.00703197
IFI44L	771.55	-0.608867	0.178963	-3.4022	0.000668468	0.0070484
LOC101929076	43.8919	-1.81478	0.533409	-3.40222	0.000668398	0.0070484
LOC100289333	48.2371	0.872386	0.256414	3.40226	0.000668319	0.0070484
BSG	21219.1	-0.358894	0.105506	-3.40166	0.000669789	0.00705778
MLLT3	3449	0.466615	0.137183	3.40141	0.000670396	0.00705964
NIN	2314.55	0.376564	0.110723	3.40097	0.000671483	0.00706654
LRRC59	4682.53	-0.133188	0.0391759	-3.39974	0.000674489	0.00709361
FAM200B	1643.26	0.255448	0.0751749	3.39805	0.000678679	0.0071331
PKD1P6	777.523	0.950637	0.279807	3.39748	0.000680104	0.00714349
CYB561D1	565.664	0.316926	0.09335	3.39503	0.000686219	0.00720309
ZNF497	452.68	0.22945	0.0675999	3.39423	0.000688214	0.00721384
COL11A2	297.588	0.600237	0.176857	3.39392	0.000688998	0.00721384
REPIN1	4990.68	-0.193574	0.05703	-3.39425	0.00068817	0.00721384
CASK	7000.58	-0.289503	0.0853004	-3.39392	0.000689005	0.00721384
USP33	4887.44	0.139731	0.0411782	3.39333	0.000690478	0.00722465
TRIM35	1248.66	-0.153437	0.045221	-3.39305	0.000691182	0.0072274
SLF2	1586.93	0.203499	0.0599986	3.39174	0.000694516	0.00725762
PLBD2	1330.03	-0.47356	0.139668	-3.3906	0.000697401	0.00727849
ALMS1	2730.09	0.367383	0.108352	3.39063	0.000697316	0.00727849
PRPSAP2	2710.01	0.263146	0.0776201	3.39018	0.000698474	0.00728504
SLC2A1	10536.9	-1.23322	0.363953	-3.38839	0.000703036	0.00732241
VPS26A	2374.85	0.158748	0.0468487	3.38853	0.000702685	0.00732241
NARS	8215.8	-0.180521	0.0532786	-3.38825	0.000703399	0.00732241
CCDC171	288.913	0.532227	0.157154	3.38665	0.000707507	0.0073605
RNF145	4403.58	0.161688	0.0477541	3.38585	0.000709573	0.00737731
SMIM11	53.6284	0.597416	0.17646	3.38557	0.000710314	0.00738033
GRIK2	1348.14	0.428358	0.126581	3.38405	0.000714238	0.00741169
COL26A1	2252.16	-0.513092	0.151616	-3.38414	0.000714004	0.00741169
IFNLR1	35.8422	-1.02555	0.303198	-3.38245	0.000718429	0.00745046
TSPEAR.AS2	21.4961	1.22604	0.362505	3.38215	0.000719214	0.00745388
TRIM69	96.5888	0.371602	0.109886	3.3817	0.000720399	0.00746144
ATP6AP1L	367.726	0.290503	0.0859152	3.38127	0.000721507	0.00746819
MAN1B1.AS1	193.246	-0.490794	0.14517	-3.38082	0.000722698	0.00747579
X11.Sep	17364.7	0.324429	0.0960044	3.37931	0.000726679	0.00751223
MPRIP	14561.3	0.224668	0.0665015	3.37839	0.000729125	0.00752783
SNAP29	1382.54	0.281495	0.0833265	3.37822	0.000729567	0.00752783
CEP41	1557.72	0.165333	0.04894	3.37827	0.000729422	0.00752783
FAM46C	103.39	-0.761867	0.225548	-3.37784	0.000730564	0.00753336
WBSCR22	1276.9	0.162065	0.0479864	3.37731	0.000731983	0.00754325
SUV39H2	731.15	0.212882	0.0630432	3.37677	0.000733434	0.00755345
CHAC1	649.287	-0.348488	0.103217	-3.37627	0.000734753	0.00756228
PRTN3	22.3271	-1.6767	0.496719	-3.37556	0.000736658	0.00757711
CNTN5	1054.41	-2.48056	0.734906	-3.37534	0.000737239	0.00757834
CPNE2	2508.3	-0.295119	0.0874876	-3.37327	0.000742805	0.00763076
NCOA4	8524.05	-0.128591	0.0381235	-3.37301	0.000743506	0.00763317
C8orf33	5136.52	-0.136545	0.0404888	-3.37241	0.000745146	0.00764522
LOC728084	93.8818	-1.55938	0.462437	-3.3721	0.000745978	0.00764896
TOM1	1588.87	-0.475358	0.141	-3.37134	0.000748029	0.00766519
C22orf29	1685.34	-0.183917	0.054583	-3.3695	0.000753051	0.00771183
NBPF8	238.099	0.721883	0.214254	3.36929	0.000753625	0.00771288
AGO1	2850.11	0.241967	0.071824	3.36888	0.000754742	0.00771949
MRVI1	272.221	-1.66089	0.493175	-3.36774	0.000757862	0.00774173
ZFP62	1641.46	0.410827	0.121985	3.36784	0.000757591	0.00774173
LOC100507468	25.738	0.821509	0.244015	3.36663	0.000760914	0.00776806
NNT	4744.85	0.203502	0.0604626	3.36576	0.000763335	0.00778792
EIF1AX	10165.5	0.171086	0.0508344	3.36554	0.000763928	0.00778911
SDK1	3030.92	-0.623829	0.185378	-3.36517	0.000764956	0.00779474
LAYN	168.832	-0.741364	0.220329	-3.36481	0.000765955	0.00779702
ZNF793	1023.51	0.564728	0.167837	3.36475	0.000766132	0.00779702
SRSF10	3019.27	0.172357	0.0512332	3.36416	0.000767765	0.00780624
CCDC80	1177.13	-2.45347	0.729313	-3.36408	0.000767992	0.00780624
SUPT20H	1882.96	0.238757	0.070982	3.36362	0.000769268	0.00781437
TBC1D4	536.081	-0.474591	0.14113	-3.36279	0.000771592	0.00783311
GADD45B	160.115	-0.825122	0.245423	-3.36205	0.00077367	0.00784935
GTF2H3	1168.48	0.169841	0.0505209	3.3618	0.000774376	0.00785164
SLC26A1	84.8411	0.523187	0.155663	3.36103	0.000776517	0.00786848
ZBTB8A	1399.57	0.403216	0.120004	3.36002	0.00077937	0.0078925
ZNF284	184.348	0.406269	0.120959	3.35873	0.000783023	0.00792459
CASP9	345.646	0.264957	0.0788997	3.35815	0.000784654	0.0079362
PEF1	1774.83	-0.401249	0.119532	-3.35682	0.000788453	0.00795908
PAN3.AS1	97.6306	0.376802	0.112254	3.35669	0.000788815	0.00795908
FAM229B	1160.24	-0.193939	0.057777	-3.35667	0.00078886	0.00795908
NTRK2	27899.8	-1.18993	0.354459	-3.35703	0.00078785	0.00795908
TCERG1L	465.779	-3.14684	0.937623	-3.35619	0.000790239	0.00796808
LIG3	1780.89	0.118139	0.0352051	3.35573	0.000791551	0.00797639
COL7A1	76.29	1.80703	0.538565	3.35527	0.000792874	0.00798481
PQBP1	1419.74	-0.19221	0.0573071	-3.35404	0.000796402	0.00801542
ATG4C	492.823	0.225053	0.0671079	3.3536	0.000797676	0.0080195
SPIN2A	29.7524	0.835518	0.249144	3.35356	0.000797787	0.0080195
ACO2	5886.98	-0.230888	0.0688537	-3.35331	0.000798513	0.00802188
SLC25A39	1949.18	-0.190793	0.0569046	-3.35286	0.000799799	0.00802986
SLC10A4	110.527	-0.746184	0.222579	-3.35245	0.000801006	0.00803705
MAPK10	2659.85	-0.827137	0.246795	-3.35151	0.000803717	0.00805932
PTS	676.424	-0.201739	0.0602011	-3.35109	0.000804951	0.00806675
APIP	437.842	0.322591	0.0962876	3.35029	0.000807273	0.00808013
ZNF232	745.855	0.257461	0.0768438	3.35045	0.000806794	0.00808013
C6orf52	97.6364	-0.487457	0.145506	-3.35007	0.0008079	0.00808147
RAP1GAP	2499.34	-0.337509	0.100798	-3.34836	0.000812919	0.0081267
MDM4	487.682	0.614173	0.183462	3.34769	0.000814882	0.00814136
HN1L	2397.77	0.209617	0.0626354	3.34663	0.000818017	0.0081608
MYO3B	92.8073	-2.03343	0.607579	-3.34677	0.000817583	0.0081608
LAGE3	861.425	-0.183985	0.0549781	-3.34652	0.000818323	0.0081608
UNC5D	629.878	-0.798918	0.238862	-3.34469	0.000823759	0.00821001
FAM182A	46.5964	-1.1344	0.339198	-3.34435	0.000824756	0.00821495
ZNF208	35.909	-6.37236	1.90571	-3.34383	0.000826316	0.00822549
CXXC1	1657.93	-0.118004	0.035297	-3.34319	0.000828217	0.0082394
CARF	783.402	0.28486	0.0852562	3.34123	0.000834079	0.00829268
B3GALT2	1704.17	0.557051	0.166777	3.3401	0.000837471	0.00831197
FBXL20	1369.55	0.266975	0.0799307	3.34008	0.000837542	0.00831197
COL5A1	1546.45	-0.859102	0.257198	-3.34023	0.000837079	0.00831197
MMAB	681.053	-0.192155	0.057536	-3.33974	0.000838574	0.00831579
ZNF652	1684.37	0.265332	0.0794499	3.33962	0.000838943	0.00831579
WNT9B	25.4312	-2.25797	0.676162	-3.33939	0.000839616	0.00831743
MAP2K2	5616.52	-0.136351	0.0408365	-3.33896	0.00084094	0.00832551
NBAS	5184.39	-0.270113	0.0809129	-3.33831	0.000842884	0.00833972
EBF4	876.748	0.287565	0.0861508	3.33792	0.000844077	0.00834647
TPI1	24692.2	-0.396172	0.11876	-3.33592	0.000850186	0.00840181
NOMO2	1943.14	-0.312181	0.0936041	-3.33512	0.000852639	0.00842097
TPRG1L	1591.01	-0.258712	0.0775913	-3.33429	0.000855163	0.00843946
TOPORS	1432.14	0.163913	0.0491616	3.33417	0.000855542	0.00843946
SLC1A3	13619.7	-0.632529	0.18983	-3.33208	0.000862006	0.00849722
TMED9	4315.04	-0.267698	0.080343	-3.33194	0.000862435	0.00849722
PITPNB	3194.27	0.256525	0.0770062	3.33123	0.000864639	0.0085138
XRN2	3809.14	0.232	0.0696751	3.32974	0.000869267	0.00855424
RIC8B	1242.54	-0.153856	0.0462638	-3.32562	0.000882213	0.00867641
CD27.AS1	144.548	-0.986512	0.296687	-3.3251	0.000883883	0.00868763
FOXRED1	865.116	0.194252	0.0584338	3.32432	0.000886354	0.00870669
ALS2	3030.48	0.189013	0.056865	3.32389	0.00088771	0.00870956
MTO1	665.573	-0.192587	0.0579402	-3.32389	0.00088771	0.00870956
ZNF22	2617.65	0.132405	0.0398387	3.32352	0.000888884	0.00871122
SSPO	157.403	1.10104	0.331289	3.3235	0.000888944	0.00871122
HSD11B2	430.545	-2.37085	0.713446	-3.32309	0.000890261	0.0087137
ARMC8	2397.19	-0.118515	0.0356638	-3.32312	0.000890171	0.0087137
CDH7	1508.04	1.76222	0.530413	3.32235	0.000892616	0.00873154
COL3A1	411.951	-1.48378	0.446782	-3.32104	0.00089682	0.00876742
JAKMIP2	2857.09	0.343693	0.103501	3.32068	0.000897994	0.00877366
BNIP1	466.852	-0.258066	0.0777365	-3.31975	0.000900995	0.00879773
DNAJC1	818.361	-0.213647	0.0643929	-3.31787	0.000907057	0.00885164
BEAN1	254.878	-0.912608	0.275275	-3.31526	0.000915589	0.00892427
TMEM130	3766.58	-0.512383	0.154548	-3.31537	0.000915213	0.00892427
LUC7L3	2407.11	0.507373	0.153069	3.31466	0.000917548	0.00893804
JUN	10032.7	-0.235626	0.0711346	-3.31239	0.000925016	0.00900543
THBS4	499.969	-0.647179	0.195479	-3.31074	0.000930492	0.00905336
LOC100288069	45.1482	1.14605	0.346195	3.31042	0.000931574	0.0090585
MED1	3560.22	0.152668	0.04612	3.31024	0.000932174	0.00905896
GOT1	2537.15	-0.237126	0.0716569	-3.30918	0.000935683	0.00908767
ZBTB7C	381.794	-0.799802	0.241754	-3.30833	0.000938527	0.00910989
ASB13	1169.52	-0.332609	0.100591	-3.30656	0.000944486	0.00914605
LBX1.AS1	24.5391	-2.34696	0.70976	-3.3067	0.000944031	0.00914605
TUG1	9247.39	0.180119	0.0544653	3.30704	0.000942878	0.00914605
PTPDC1	309.698	0.38096	0.115204	3.30683	0.000943569	0.00914605
ROBO1	14255.4	0.438891	0.132748	3.3062	0.000945711	0.0091525
NANOS1	894.102	-0.629875	0.190569	-3.30523	0.00094898	0.0091787
PDE4DIP	5579.65	0.249911	0.0756405	3.30394	0.000953376	0.00921578
SURF4	5867.69	-0.213723	0.0647252	-3.302	0.000959977	0.00927411
EME2	38.3953	0.693261	0.209966	3.30177	0.000960767	0.0092744
SMC6	916.495	0.231668	0.0701672	3.30166	0.00096114	0.0092744
PRLHR	10.6657	-1.83448	0.555883	-3.30013	0.000966412	0.00931979
PRMT7	1090.96	-0.181276	0.0549426	-3.29937	0.000969032	0.00933406
PAK7	3937.44	0.619314	0.187702	3.29946	0.000968712	0.00933406
SBDS	2930.08	-0.107698	0.0326464	-3.29891	0.000970594	0.00934361
ULK4	258.383	1.1612	0.35217	3.29727	0.000976309	0.0093931
KDF1	9.82893	1.3811	0.41911	3.29532	0.00098309	0.00945279
ZNF311	235.55	0.609197	0.18496	3.29366	0.000988909	0.00950316
SCAMP2	856.573	-0.238405	0.072395	-3.29311	0.000990841	0.00951614
STXBP5.AS1	84.6635	-1.2243	0.371974	-3.29137	0.000997013	0.0095698
SOX1	2454.72	-0.521155	0.15841	-3.28991	0.00100219	0.00961387
BCAS3	1488.95	-0.190816	0.0580163	-3.289	0.00100545	0.00963949
NGB	33.889	-1.90136	0.578133	-3.2888	0.00100614	0.00964047
LGR4	1965.22	-1.63276	0.496545	-3.28824	0.00100817	0.00964512
TTC21A	85.2693	0.860195	0.261589	3.28834	0.0010078	0.00964512
TRMT10B	339.337	0.37132	0.112926	3.28817	0.00100839	0.00964512
FAM222A	768.032	-1.59521	0.485185	-3.28785	0.00100957	0.00965076
RASSF4	1039.24	-0.627799	0.19097	-3.28743	0.00101107	0.00965939
PEX3	554.509	0.19534	0.0594372	3.28649	0.00101443	0.00968145
SCARA3	1415.35	0.407742	0.124067	3.28646	0.00101456	0.00968145
NUF2	447.206	0.517552	0.157547	3.28507	0.00101958	0.00972373
DHRS12	168.847	0.382233	0.116368	3.28469	0.00102093	0.00972917
FAM13A.AS1	14.4446	1.85978	0.566215	3.28458	0.00102134	0.00972917
NTRK1	76.4144	-1.86788	0.568766	-3.28408	0.00102314	0.00974066
PHYH	1021.35	0.421461	0.128404	3.2823	0.00102964	0.00979415
C5orf30	2025.95	-0.355762	0.108396	-3.28205	0.00103055	0.00979415
ZNF510	1756.17	0.154256	0.0469994	3.28208	0.00103043	0.00979415
SESN1	1334.26	-0.314867	0.0959427	-3.28182	0.00103138	0.00979632
ZNF107	572.915	-0.285812	0.0870951	-3.28161	0.00103216	0.00979799
PYGB	11677.6	-0.257439	0.0784543	-3.28139	0.00103297	0.00980003
NSDHL	1049.9	-0.26001	0.0792422	-3.28121	0.00103364	0.00980073
PRR5L	359.871	-1.08586	0.331082	-3.27973	0.00103908	0.00984663
KLC4	1878.22	0.290654	0.0886294	3.27943	0.00104017	0.00985123
POPDC2	37.6827	-0.757032	0.231021	-3.27689	0.00104956	0.00993115
PCMTD1	1450.51	0.228955	0.0698709	3.27682	0.00104982	0.00993115
GRIA1	10427.5	-0.351194	0.107183	-3.27658	0.00105072	0.00993382
PBX3	6242.15	-2.1498	0.656142	-3.27642	0.00105132	0.00993382
FNDC5	1039.26	-1.06145	0.324121	-3.27485	0.00105717	0.00997187
PRSS8	13.4442	-1.22093	0.372791	-3.27511	0.00105621	0.00997187
GTF2IRD1	1773.4	0.177115	0.0540817	3.27496	0.00105678	0.00997187
DPY19L2	187.671	0.606101	0.185112	3.27423	0.0010595	0.00997863
FAM86EP	99.2228	0.407422	0.124435	3.27417	0.00105971	0.00997863
SFRP1	19868.7	0.784451	0.239572	3.27438	0.00105893	0.00997863
ADGRA1	357.448	-0.760571	0.23235	-3.27338	0.00106269	0.0100009
SDHD	1357.13	-0.187437	0.0572821	-3.27217	0.00106725	0.0100381
TAX1BP1	6805.28	-0.190957	0.0583711	-3.27143	0.00107007	0.0100588
TTYH2	1100.99	-0.569732	0.174173	-3.27107	0.00107141	0.0100598
STMN3	10166.8	-0.471266	0.144065	-3.2712	0.00107093	0.0100598
TNFAIP8	108.775	-0.540446	0.16523	-3.27087	0.00107217	0.0100612
DSTNP2	140.059	0.585334	0.17899	3.27021	0.00107467	0.0100788
KCNS1	22.5147	-1.00665	0.307891	-3.26949	0.0010774	0.0100987
CBR4	896.622	0.193136	0.0590751	3.26933	0.00107803	0.0100988
ARHGAP23	4348.13	0.267522	0.0818416	3.26878	0.00108012	0.0101126
PPIP5K1	451.443	0.314377	0.0962153	3.26744	0.00108526	0.010155
CFAP221	160.81	-0.496366	0.151928	-3.26712	0.00108646	0.0101604
MC4R	22.9167	-2.28167	0.698449	-3.26676	0.00108786	0.0101676
YIF1A	2081.68	-0.183972	0.0563283	-3.26606	0.00109055	0.010179
CCDC150	38.8455	0.709897	0.217354	3.26608	0.00109047	0.010179
STK32A	586.314	-0.397586	0.121742	-3.2658	0.00109155	0.010179
TMEM255A	668.677	-1.98359	0.607384	-3.2658	0.00109157	0.010179
TCTN3	1580.13	-0.310088	0.0949602	-3.26546	0.00109288	0.0101855
NKX6.2	8.84101	-3.32751	1.01917	-3.26491	0.001095	0.0101994
LOC100287225	10.9617	-1.97076	0.603679	-3.26458	0.00109625	0.0102053
CEP192	1197.68	0.214513	0.0657164	3.26423	0.00109763	0.0102123
SLC25A42	544.601	0.249244	0.0763775	3.26332	0.00110116	0.0102393
PKP3	6.5905	-2.25556	0.691688	-3.26094	0.00111042	0.0103079
RBM4	2009.17	0.150826	0.0462504	3.26107	0.00110993	0.0103079
BSPRY	12.4694	-1.57863	0.484073	-3.26114	0.00110965	0.0103079
PTPRB	33.0607	-1.21486	0.372599	-3.2605	0.00111218	0.0103134
ZBED4	3054.92	0.329661	0.101108	3.26047	0.00111227	0.0103134
NBPF15	1023.5	0.561108	0.172144	3.25953	0.00111599	0.0103411
CDV3	5891.97	0.284952	0.0874249	3.25939	0.00111652	0.0103411
C17orf67	114.408	0.352487	0.108178	3.25839	0.00112045	0.0103716
CIART	399.339	-0.196954	0.0604663	-3.25725	0.00112496	0.0104016
KCNT2	467.562	0.823353	0.252775	3.25726	0.00112495	0.0104016
ZMAT3	3774.05	-0.293463	0.0901096	-3.25674	0.001127	0.0104146
EHD4	295.884	-0.827112	0.253996	-3.2564	0.00112833	0.010421
MTDH	5421.46	0.116054	0.0356461	3.25572	0.00113104	0.0104401
GADD45A	1678.91	-0.231053	0.0709788	-3.25523	0.00113299	0.0104523
RGAG4	3008.58	-0.255554	0.0785151	-3.25483	0.00113458	0.010461
LZIC	1394.67	0.209538	0.0643826	3.25457	0.00113564	0.0104649
ZNF655	1561.82	0.221288	0.0680044	3.25403	0.00113781	0.0104789
PCDH7	2126.73	-0.88551	0.272142	-3.25385	0.00113853	0.0104798
ZNF596	164.653	-0.543668	0.167109	-3.25336	0.00114048	0.0104918
NADK	1928.06	0.186789	0.057434	3.25223	0.00114504	0.0105278
METTL1	158.319	-0.413937	0.127321	-3.25112	0.0011495	0.0105629
CECR2	2074.67	0.310321	0.0954592	3.25083	0.00115069	0.0105679
UBE2Q2P2	137.18	0.55346	0.170288	3.25015	0.00115345	0.0105862
ETAA1	559.747	0.271922	0.0836683	3.25	0.00115406	0.0105862
PRPF40A	5649.84	0.178555	0.0549443	3.24975	0.00115507	0.0105862
ARL4C	7241.41	-0.256211	0.0788414	-3.2497	0.00115527	0.0105862
PPM1H	1255.91	-0.886596	0.272845	-3.24945	0.00115627	0.0105894
C11orf30	1894.37	0.241762	0.0744408	3.24771	0.0011634	0.0106488
TP53INP1	1455.84	0.290201	0.0893704	3.24717	0.00116557	0.0106627
GNL3L	625.241	0.290662	0.0895195	3.24692	0.00116663	0.0106664
BAZ1B	6993.01	0.15537	0.0478597	3.24637	0.00116885	0.0106808
SRD5A1	3400.41	-0.394122	0.121425	-3.24581	0.00117116	0.0106959
WDR81	979.804	-0.274302	0.0845293	-3.24505	0.00117429	0.0107185
PTCHD2	2427.35	-0.324829	0.100112	-3.24467	0.00117588	0.010727
ARHGEF6	1167.26	-0.911314	0.280933	-3.24388	0.00117912	0.0107506
PRELP	309.846	-1.0669	0.328946	-3.24338	0.00118119	0.0107635
HGSNAT	1807.61	0.259112	0.0798942	3.2432	0.00118197	0.0107646
PTGR2	805.522	0.257195	0.0793159	3.24267	0.00118417	0.0107786
GSTA1	17.7096	-2.49425	0.769515	-3.24133	0.00118974	0.0108233
GBAP1	108.024	-0.547803	0.169026	-3.24093	0.0011914	0.0108324
TMEM147	809.013	-0.216517	0.066814	-3.24059	0.00119284	0.0108395
MXD4	2814.61	0.28072	0.0866544	3.23954	0.00119722	0.0108733
PRPH	93.8527	-1.94586	0.600698	-3.23934	0.00119807	0.010875
INPP5E	990.961	0.306849	0.0947422	3.23878	0.00120044	0.0108904
GRIN2D	2677.96	-1.05802	0.326725	-3.23825	0.00120265	0.0108984
PSMD5.AS1	366.21	-1.0404	0.321285	-3.23826	0.00120261	0.0108984
PWARSN	199.911	0.360575	0.111367	3.23772	0.00120488	0.0109126
IFI44	135.539	0.689567	0.213013	3.2372	0.00120709	0.0109205
DHRS4L2	151.866	-0.682488	0.210824	-3.23724	0.00120692	0.0109205
GPR68	90.6036	-1.06248	0.32825	-3.23681	0.00120874	0.0109294
GFM1	2679.73	-0.175972	0.0543787	-3.23604	0.00121198	0.0109527
NES	17831.5	-1.24301	0.384316	-3.23434	0.00121925	0.0110122
NPIPA5	55.5459	1.23877	0.383153	3.2331	0.00122456	0.0110533
CYB561	914.813	-0.86636	0.267977	-3.23296	0.00122514	0.0110533
NINJ1	796.885	-0.455509	0.140928	-3.23222	0.00122833	0.0110759
MEF2C.AS1	29.8526	1.0588	0.327598	3.23202	0.00122918	0.0110775
UBN1	2214.44	0.264166	0.0817451	3.23159	0.00123105	0.0110882
ATP10D	524.938	0.24262	0.0750866	3.2312	0.0012327	0.011097
CPS1	291.414	-1.02777	0.318142	-3.23054	0.00123555	0.0111104
CXXC4	1569.35	-0.799406	0.247452	-3.23055	0.00123552	0.0111104
CEP128	306.526	0.494815	0.153195	3.22997	0.00123803	0.0111266
SCAMP3	1909.12	-0.152079	0.0471003	-3.22883	0.00124298	0.011165
MSRB3	102.58	-0.518834	0.160722	-3.22814	0.00124598	0.0111858
BCL2L15	6.93513	1.82588	0.565704	3.22762	0.00124824	0.0111913
BTBD7	1711.01	0.165769	0.051361	3.22753	0.00124864	0.0111913
PLOD2	2024.86	-0.840051	0.260259	-3.22775	0.00124768	0.0111913
GRIN3B	63.6571	1.12057	0.347255	3.22695	0.00125117	0.0112042
CD320	1048.72	-0.377755	0.117065	-3.22689	0.00125145	0.0112042
C19orf70	781.085	-0.218448	0.067703	-3.22656	0.0012529	0.0112111
CDH6	1368.68	0.71574	0.221857	3.22613	0.00125474	0.0112214
MUC4	7.22868	1.88686	0.584969	3.22556	0.00125725	0.0112377
GMPR	187.378	-0.724366	0.224589	-3.22529	0.00125843	0.0112421
CTSD	7599.24	-0.498988	0.154741	-3.22468	0.00126115	0.0112602
HPRT1	1027.99	-0.237967	0.0738193	-3.22364	0.00126572	0.0112949
FGF14	555.243	-0.724646	0.224831	-3.22307	0.00126824	0.0113051
ING2	702.529	0.172049	0.0533793	3.22314	0.00126795	0.0113051
CD59	4409.77	-0.497047	0.154236	-3.22263	0.00127019	0.0113163
LAMA3	68.7053	1.13022	0.350753	3.22226	0.00127183	0.0113248
EEF1E1	97.6461	-0.453295	0.140733	-3.22097	0.0012776	0.0113664
SLC31A1	2238.46	-0.148078	0.0459742	-3.2209	0.00127789	0.0113664
PCDHAC2	1228.33	-0.299808	0.0930918	-3.22056	0.0012794	0.0113736
PLA2G16	484.627	-0.894048	0.277625	-3.22035	0.00128035	0.0113741
XKR9	32.2822	1.00814	0.313064	3.22024	0.00128084	0.0113741
RORB	1579.03	1.39461	0.433209	3.21926	0.00128521	0.0114067
ACOT1	140.203	-0.594416	0.184667	-3.21885	0.00128704	0.0114167
CALB1	1523.99	-1.77997	0.553084	-3.21826	0.0012897	0.0114342
TTC17	3478.53	0.131831	0.0409777	3.21713	0.0012948	0.0114669
CLSTN3	10540.6	-0.298942	0.0929183	-3.21726	0.00129421	0.0114669
CLEC4A	13.0778	1.252	0.389313	3.21591	0.00130031	0.0115095
ADAMTS18	150.358	-1.91101	0.594343	-3.21533	0.00130293	0.0115265
CCNE1	139.035	-0.384733	0.119694	-3.2143	0.00130762	0.0115507
TFAP2A.AS1	15.5515	-2.22353	0.691754	-3.21434	0.00130743	0.0115507
TMEM14C	2228.28	-0.318578	0.0991138	-3.21427	0.00130778	0.0115507
XRCC2	74.1833	0.486577	0.151411	3.21362	0.00131072	0.0115704
ZNF343	314.294	0.371622	0.11568	3.21251	0.0013158	0.0115964
ZNF518B	2248.83	0.226987	0.0706564	3.21255	0.00131563	0.0115964
PTPN12	2228.02	0.303218	0.0943821	3.21266	0.00131512	0.0115964
SLC16A9	1499.13	0.246749	0.0768476	3.21088	0.00132328	0.0116561
C3orf62	177.918	0.384301	0.119693	3.21072	0.00132402	0.0116564
NEAT1	1038.52	0.982547	0.306045	3.21047	0.00132518	0.0116603
CEP164	809.343	0.274589	0.0855511	3.20965	0.00132895	0.0116872
DOCK7	4530.24	0.148678	0.0463273	3.2093	0.00133057	0.0116952
EXOSC10	1521.56	0.246665	0.076879	3.20848	0.00133437	0.0117097
SHISA4	763.428	-0.489768	0.152643	-3.20859	0.00133389	0.0117097
SUDS3	2101.86	0.236733	0.073783	3.2085	0.00133431	0.0117097
PRKRIP1	16.3907	-1.13572	0.354037	-3.2079	0.00133706	0.0117222
IMPDH1	1765.24	0.295326	0.0920631	3.20787	0.00133722	0.0117222
SOCS5	1345.76	-0.420707	0.131187	-3.20693	0.00134162	0.0117544
GRHL3	19.8294	-1.48619	0.463491	-3.20651	0.00134355	0.0117651
IPP	625.338	0.33718	0.105185	3.2056	0.00134782	0.0117907
KLK4	37.175	-1.37284	0.428352	-3.20493	0.00135096	0.0117907
LINC00657	27131	0.397853	0.12416	3.20435	0.00135368	0.0117907
SMARCC1	5805.39	0.254321	0.0793658	3.20442	0.00135337	0.0117907
LINC01094	44.1013	-1.20717	0.376605	-3.2054	0.00134874	0.0117907
SCOC	5340.97	-0.25063	0.0782089	-3.20462	0.00135239	0.0117907
LOC285696	119.401	0.624749	0.194933	3.20495	0.00135086	0.0117907
DHX29	1509.13	0.187218	0.0584147	3.20498	0.00135073	0.0117907
LINC01184	221.93	0.255795	0.0798275	3.20435	0.00135368	0.0117907
BAG4	1656.23	-0.207917	0.0648754	-3.20486	0.00135127	0.0117907
MTCL1	932.303	0.244899	0.0764348	3.20402	0.00135523	0.0117917
FAM71E1	122.473	-0.395529	0.123444	-3.20411	0.00135483	0.0117917
PRKCB	4893.81	-0.62699	0.195704	-3.20376	0.00135646	0.0117961
GPR156	338.297	0.932336	0.291058	3.20327	0.00135877	0.0118099
CBX6	4106.81	-0.196634	0.0613913	-3.20296	0.00136024	0.0118164
GRIA4	1501.73	-1.15597	0.361028	-3.20187	0.00136537	0.0118397
MED28	1927.05	0.238067	0.0743492	3.20201	0.00136471	0.0118397
CNOT6L	2125.22	0.223677	0.0698565	3.20195	0.001365	0.0118397
SH3TC2	13.1759	1.30557	0.407764	3.20178	0.00136581	0.0118397
RNF128	52.959	-1.13279	0.353843	-3.2014	0.00136762	0.0118491
TMEM9B	2014.36	-0.218064	0.0681269	-3.20085	0.00137022	0.0118653
LOC101929709	106.473	-0.447358	0.13978	-3.20046	0.0013721	0.0118753
SETD5	7058.68	0.238941	0.0746701	3.19996	0.00137448	0.0118896
RPS26	5040.37	0.319496	0.0998665	3.19923	0.00137795	0.0119134
SKA2	2976.35	0.225899	0.0706199	3.19881	0.00137998	0.0119246
VSTM2A.OT1	117.567	-1.42965	0.447023	-3.19815	0.00138311	0.0119453
ILVBL	2467.45	-0.33266	0.104024	-3.19792	0.00138424	0.0119488
YTHDC2	1497.4	0.280537	0.0877363	3.1975	0.00138623	0.0119597
ATP1A2	24744.9	-1.13312	0.354443	-3.1969	0.00138915	0.0119786
ANKRD34C	42.7709	-2.61263	0.817386	-3.19632	0.00139192	0.0119961
AURKAIP1	2186.48	-0.257098	0.0804729	-3.19484	0.00139909	0.0120516
LHFPL3	677.448	-1.31087	0.410402	-3.1941	0.00140266	0.012076
BRF2	865.607	-0.266073	0.0833146	-3.1936	0.00140513	0.0120909
ARHGAP15	31.8282	-1.1145	0.349041	-3.19304	0.00140785	0.012108
NIPSNAP3B	77.1471	0.570494	0.17868	3.19283	0.00140884	0.0121101
ZNF137P	61.4413	0.734079	0.229927	3.19266	0.00140969	0.0121111
NT5E	100.541	-1.2131	0.380077	-3.19174	0.0014142	0.0121435
TIMP1	581.556	-0.583023	0.182678	-3.19153	0.0014152	0.0121456
TRNAU1AP	647.264	0.225219	0.0705838	3.19081	0.00141876	0.0121649
KLF5	154.26	-0.995487	0.311989	-3.19077	0.00141893	0.0121649
SVOPL	13.2586	1.09663	0.343762	3.19009	0.00142231	0.0121875
BLOC1S3	624.401	-0.265503	0.0832413	-3.18956	0.0014249	0.0121969
DNAAF5	921.083	-0.338708	0.106192	-3.18958	0.00142479	0.0121969
TTC39A	37.2949	-0.772583	0.242239	-3.18935	0.00142595	0.0121995
ARHGAP22	133.466	-1.0904	0.341992	-3.18838	0.00143074	0.0122214
AP5S1	279.002	-0.473414	0.148471	-3.18861	0.00142961	0.0122214
MID2	779.421	-0.893378	0.28019	-3.18847	0.00143027	0.0122214
RBBP8	744.54	0.205516	0.0644624	3.18816	0.00143182	0.0122242
ABCC10	572.239	0.39951	0.125336	3.18752	0.00143496	0.0122447
ALDH6A1	1635.22	-0.463201	0.145337	-3.18709	0.00143712	0.0122567
PYCR1	2475.05	-0.263543	0.0827199	-3.18597	0.00144269	0.0122914
SLC16A3	3160.24	-0.495924	0.155657	-3.18601	0.00144251	0.0122914
ABCD4	756.506	0.291519	0.091511	3.18562	0.00144444	0.0122999
SATB1	2725.42	0.588761	0.184833	3.18537	0.00144569	0.0123041
PINK1	1189.68	-0.215493	0.0676862	-3.1837	0.00145405	0.0123689
NDUFA9	1619.82	-0.181292	0.0569509	-3.1833	0.00145606	0.0123795
CDCA7L	1170.73	0.759464	0.2386	3.183	0.00145759	0.0123861
CAPN15	1060.58	0.333343	0.104739	3.18261	0.00145953	0.0123962
PRR35	175.89	-3.03868	0.954942	-3.18205	0.00146235	0.0124008
XPNPEP3	330.043	0.621628	0.195342	3.18225	0.00146134	0.0124008
SASH1	1456.73	-0.493095	0.154955	-3.18217	0.00146174	0.0124008
TCHP	461.617	0.273259	0.0858797	3.18188	0.00146323	0.0124018
UTP20	773.903	0.284795	0.0895139	3.18158	0.00146475	0.012404
DRP2	737.858	-0.733499	0.230549	-3.18153	0.001465	0.012404
LINC01088	88.9573	-1.1878	0.373453	-3.18059	0.00146976	0.0124379
RGS5	143.343	-0.52172	0.164108	-3.17913	0.0014772	0.0124944
C5orf28	331.595	-0.304867	0.0959164	-3.17846	0.00148058	0.0125166
KCNH5	204.352	1.28963	0.405814	3.1779	0.00148347	0.0125345
CNP	4648.03	-0.247697	0.0779521	-3.17756	0.00148522	0.0125367
TMEM205	1189.38	-0.278817	0.0877461	-3.17755	0.00148526	0.0125367
PADI2	84.4367	-0.536069	0.168742	-3.17685	0.00148887	0.0125541
ATF6B	2225.54	0.168374	0.0529995	3.1769	0.00148858	0.0125541
PRKRIR	3022.15	0.178116	0.0560798	3.17613	0.00149256	0.0125779
ARHGAP25	30.156	0.83221	0.262031	3.176	0.00149321	0.0125779
FAM69C	733.651	-0.619241	0.195031	-3.17509	0.0014979	0.0126108
ADRA1A	363.558	-1.32082	0.41612	-3.17413	0.00150288	0.0126463
C15orf39	843.936	-0.356755	0.112401	-3.17396	0.00150376	0.0126472
NAMPT	3663.38	-0.185617	0.0585018	-3.17284	0.00150956	0.0126895
NGFRAP1	7092.78	-0.255611	0.0805836	-3.172	0.00151394	0.0127197
CCKBR	370.838	0.626995	0.197712	3.17126	0.0015178	0.0127402
BDKRB2	38.6236	-1.12111	0.353543	-3.17108	0.00151871	0.0127402
BFSP1	35.7278	-1.03077	0.325049	-3.17111	0.00151859	0.0127402
LAMP2	6681.35	-0.358565	0.113082	-3.17085	0.00151994	0.012744
TRIM4	770.142	-0.301362	0.0950472	-3.17065	0.00152097	0.0127461
FLT4	83.9794	0.786574	0.248106	3.17031	0.00152277	0.0127546
SPIRE2	913.959	0.399416	0.126007	3.16978	0.00152553	0.0127713
C6orf203	457.527	0.201985	0.0637576	3.16801	0.00153485	0.0128427
ATF7IP2	147.683	0.316577	0.0999612	3.167	0.00154023	0.0128745
ZNF16	488.381	-0.283174	0.08941	-3.16714	0.00153945	0.0128745
TNFRSF21	3283.66	-0.48746	0.153964	-3.16607	0.00154516	0.0129092
NMRK1	221.22	0.288052	0.0909981	3.16547	0.00154834	0.0129292
LOC101927151	232.748	0.416272	0.131591	3.16337	0.00155952	0.0130158
FAM20B	3520.94	0.401672	0.127065	3.16114	0.00157151	0.0131093
AMBRA1	2926.16	-0.149627	0.0473425	-3.16052	0.00157488	0.013124
UNC13C	925.112	-1.80342	0.570596	-3.16059	0.00157451	0.013124
RHOG	239.467	-0.371133	0.117434	-3.16037	0.00157571	0.0131242
LOC440982	130.905	-2.58955	0.819469	-3.16003	0.00157752	0.0131326
ATP12A	34.1851	-1.6276	0.515133	-3.15957	0.00158	0.0131466
PSMD8	5256.26	-0.135092	0.0427585	-3.15941	0.00158087	0.0131472
SLC6A1	3456.24	-0.895341	0.283469	-3.15851	0.00158577	0.0131812
ADAM15	1911.71	-0.37944	0.120152	-3.15801	0.00158852	0.0131974
PLAGL2	1020.58	0.235541	0.0745967	3.15753	0.00159113	0.0132124
ZNF234	428.15	0.301716	0.0955969	3.15613	0.0015988	0.0132619
COMMD1	394.178	-0.231104	0.0732234	-3.15615	0.00159869	0.0132619
ZNF252P.AS1	8.41163	-1.59474	0.505304	-3.15599	0.00159953	0.0132619
TCONS_00029157	11.2953	-1.22579	0.388437	-3.1557	0.00160112	0.0132684
ZHX3	2552.01	0.315567	0.100084	3.15302	0.0016159	0.0133841
UBTD1	400.811	-0.594435	0.188556	-3.15257	0.00161838	0.0133935
SLC6A20	77.0768	-1.26645	0.401724	-3.15252	0.00161867	0.0133935
EXOC3.AS1	161.676	0.428192	0.135858	3.15177	0.00162284	0.0134213
TUBB6	1443.34	-0.385817	0.122419	-3.15162	0.00162367	0.0134213
FAM21EP	26.5681	-0.769471	0.244184	-3.1512	0.00162603	0.013434
MITF	293.65	-0.723172	0.229508	-3.15097	0.00162727	0.0134375
CRAMP1L	2192.85	0.307647	0.0976454	3.15065	0.00162907	0.0134455
CNOT3	2052.87	0.14217	0.0451324	3.15006	0.00163238	0.0134661
ABI1	2431.7	-0.292882	0.092997	-3.14937	0.00163623	0.0134893
BZW1	8437.22	-0.129675	0.0411762	-3.14926	0.00163684	0.0134893
THAP8	609.338	-0.290522	0.0922634	-3.14883	0.00163925	0.0135023
CCNG2	5584.14	0.232566	0.0738728	3.14819	0.00164286	0.0135253
CDIPT	3209.65	-0.140316	0.0445789	-3.14759	0.00164623	0.0135462
HEXA	2579.61	-0.319948	0.101658	-3.14729	0.00164789	0.0135531
PPT1	4380.95	-0.337958	0.107399	-3.14676	0.00165092	0.0135688
TMCC1.AS1	102.38	0.474657	0.150845	3.14666	0.00165145	0.0135688
DPP6	5266.95	-0.350601	0.111441	-3.14606	0.00165485	0.0135899
NPIPB4	27.544	1.18583	0.377228	3.14354	0.00166915	0.0136951
FAM210A	958.247	-0.229448	0.072991	-3.14351	0.00166933	0.0136951
SMARCD1	5030.26	0.300975	0.0957754	3.14251	0.00167506	0.0137339
PLEKHG4B	265.563	0.368235	0.117183	3.14239	0.00167575	0.0137339
RTP5	39.2494	-1.5874	0.505193	-3.14216	0.00167705	0.0137377
[truncated: 14,417 more rows]

## Sheet: Day 50 Ventral
	baseMean	log2FoldChange	lfcSE	stat	pvalue	padj
C1QL2	324.325	-2.88582	0.181874	-15.8671	1.07e-56	1.74e-52
HTR2C	734.312	-1.66397	0.128765	-12.9225	3.36e-38	2.73e-34
LRRN1	2336.72	0.752814	0.0623066	12.0824	1.31e-33	7.08e-30
GJA1	943.995	-1.93179	0.166047	-11.634	2.77e-31	1.12e-27
TBR1	116.379	6.28382	0.567947	11.0641	1.87e-28	5.38e-25
TCEAL6	312.363	-2.01402	0.182121	-11.0587	1.99e-28	5.38e-25
C3orf58	2553.61	-1.2791	0.118022	-10.8378	2.28e-27	5.28e-24
ELK3	166.833	-2.03822	0.190119	-10.7208	8.13e-27	1.65e-23
COL18A1	940.897	-2.04187	0.191637	-10.6548	1.66e-26	2.98e-23
IRAK1	1069.71	-1.70504	0.161428	-10.5623	4.46e-26	7.23e-23
ADGRV1	4028.52	-1.42508	0.137032	-10.3996	2.49e-25	3.67e-22
PEG3	7232.31	-6.52512	0.630896	-10.3426	4.52e-25	6.11e-22
SLFN11	165.216	-4.1212	0.401074	-10.2754	9.09e-25	1.14e-21
COL8A1	143.769	-4.35241	0.432784	-10.0568	8.58e-24	9.94e-21
LOC100288778	704.69	-1.17811	0.117438	-10.0318	1.11e-23	1.2e-20
TRPM8	89.4381	-2.28064	0.230397	-9.89873	4.22e-23	4.28e-20
PCDHGB7	1289.36	-1.24805	0.130054	-9.59647	8.27e-22	7.9e-19
LGR5	324.118	-4.17413	0.435978	-9.57419	1.03e-21	9.25e-19
CCDC80	127.85	-2.3747	0.250697	-9.47241	2.73e-21	2.34e-18
DDR2	105.556	-2.44012	0.258419	-9.44247	3.64e-21	2.95e-18
NDP	136.224	1.46084	0.154871	9.43262	4e-21	3.09e-18
NDUFA4L2	679.279	-1.32943	0.141807	-9.37489	6.92e-21	5.11e-18
H3F3AP4	3674.64	0.815439	0.0870368	9.36889	7.33e-21	5.17e-18
MIMT1	55.415	-4.70339	0.504545	-9.32204	1.14e-20	7.72e-18
FABP7	6283.27	0.943908	0.101786	9.27347	1.8e-20	1.17e-17
HES5	1860.54	-1.45901	0.157425	-9.26801	1.9e-20	1.18e-17
PVRL3	1762.17	-1.55341	0.169353	-9.17265	4.62e-20	2.77e-17
FILIP1L	141.732	-1.61893	0.177782	-9.10627	8.53e-20	4.94e-17
NPNT	879.198	-1.51322	0.16631	-9.09882	9.13e-20	5.11e-17
ID3	325.67	-4.31365	0.477441	-9.03495	1.64e-19	8.87e-17
MAGEL2	6716.73	-0.86099	0.0976819	-8.81423	1.21e-18	6.31e-16
FAM53B	3494.5	-0.558037	0.0637165	-8.75812	1.99e-18	1.01e-15
MTMR10	256.725	-1.43812	0.167347	-8.59369	8.42e-18	4.14e-15
TMEM47	3860.77	-0.703297	0.0820159	-8.57512	9.9e-18	4.72e-15
COL22A1	111.197	-7.65273	0.895244	-8.54821	1.25e-17	5.8e-15
SGK223	1137.41	0.815395	0.0956331	8.52629	1.51e-17	6.81e-15
DDX11L2	79.9271	4.57014	0.537414	8.50395	1.83e-17	8.04e-15
ATP10A	71.9816	-2.27486	0.267856	-8.49284	2.02e-17	8.61e-15
CPXM2	378.045	-2.38706	0.282589	-8.44711	2.99e-17	1.24e-14
MGST1	884.706	-2.87448	0.343694	-8.36347	6.09e-17	2.41e-14
KLF13	1530.16	-0.717186	0.0857476	-8.36392	6.07e-17	2.41e-14
LOC403323	27.1219	-3.44571	0.412711	-8.34896	6.89e-17	2.66e-14
RXRG	421.905	-1.37598	0.16546	-8.31607	9.09e-17	3.43e-14
PRELP	125.012	-2.97917	0.361319	-8.24525	1.65e-16	6.08e-14
ERV3.1	319.096	-1.60114	0.196486	-8.1489	3.67e-16	1.32e-13
VAV3	165.402	1.2989	0.160307	8.10256	5.38e-16	1.9e-13
CHL1	5221.15	-2.81463	0.347522	-8.09914	5.53e-16	1.91e-13
FOLH1	54.631	-6.29906	0.778705	-8.08915	6.01e-16	2.03e-13
FAM135B	164.212	-5.65609	0.700266	-8.07706	6.63e-16	2.2e-13
DNAJC15	467.744	0.93493	0.11641	8.03136	9.64e-16	3.07e-13
DACT1	1744.29	1.34482	0.167421	8.03255	9.55e-16	3.07e-13
RNF182	1054.4	-0.897254	0.11306	-7.93611	2.09e-15	6.51e-13
AMOT	5612.32	-1.20308	0.15183	-7.92388	2.3e-15	7.05e-13
FAR2P1	32.9063	-2.90427	0.370743	-7.83366	4.74e-15	1.42e-12
LPL	855.018	-4.26237	0.546604	-7.79791	6.29e-15	1.86e-12
CD109	64.9588	-2.43597	0.31387	-7.76108	8.42e-15	2.44e-12
VARS2	1138.8	0.512478	0.0661114	7.75174	9.06e-15	2.58e-12
NFIX	423.063	-1.41596	0.18272	-7.74933	9.24e-15	2.58e-12
IGFBP3	71.0057	-1.79914	0.232756	-7.7297	1.08e-14	2.96e-12
SP140L	51.6143	-4.59036	0.602476	-7.61915	2.55e-14	6.91e-12
ASXL3	1002.54	0.89198	0.117176	7.61234	2.69e-14	7.16e-12
APOL4	22.9578	-2.93831	0.386293	-7.60643	2.82e-14	7.37e-12
PCDHA6	476.519	0.807528	0.10668	7.56965	3.74e-14	9.64e-12
FIBIN	346.718	-3.77474	0.499069	-7.56356	3.92e-14	9.94e-12
RBMS1	203.696	-1.35477	0.179676	-7.54007	4.7e-14	1.17e-11
ZNF702P	362.806	1.693	0.225255	7.51593	5.65e-14	1.39e-11
FZD5	4224.64	-1.61933	0.215799	-7.50389	6.2e-14	1.5e-11
NLGN4X	4775.73	0.563976	0.0752512	7.49458	6.65e-14	1.59e-11
PCDHGA7	211.783	-6.12121	0.817786	-7.48511	7.15e-14	1.66e-11
TSPYL5	1351.03	-0.88232	0.117858	-7.48629	7.09e-14	1.66e-11
VGLL3	549.522	-1.72675	0.23122	-7.468	8.14e-14	1.86e-11
PHLDA1	1935.71	1.04101	0.140508	7.40888	1.27e-13	2.87e-11
LAMP5	101.042	1.47292	0.198849	7.4072	1.29e-13	2.87e-11
GPR1	138.137	-1.57175	0.212904	-7.38244	1.55e-13	3.41e-11
ADCY8	255.72	1.37169	0.186551	7.35289	1.94e-13	4.2e-11
HDHD1	1609.16	0.421315	0.0574328	7.33579	2.2e-13	4.71e-11
SIX6	179.228	-5.61259	0.765921	-7.32789	2.34e-13	4.93e-11
ACTG2	32.3753	-3.69222	0.504902	-7.31274	2.62e-13	5.44e-11
RNF216P1	1211.43	0.5044	0.0690487	7.30499	2.77e-13	5.7e-11
PRKCQ	130.003	-1.75052	0.239857	-7.29818	2.92e-13	5.92e-11
PTPRB	209.882	-4.17392	0.572746	-7.28756	3.16e-13	6.25e-11
GPRC5B	2348.16	0.533654	0.0732263	7.28774	3.15e-13	6.25e-11
PERP	431.834	-1.01753	0.139746	-7.2813	3.31e-13	6.46e-11
MMP28	73.7507	-2.45609	0.338268	-7.26077	3.85e-13	7.43e-11
TANC1	306.661	-1.57576	0.217634	-7.24042	4.47e-13	8.54e-11
FGD5	253.628	1.26586	0.175345	7.21927	5.23e-13	9.86e-11
FAN1	854.867	-0.90881	0.126874	-7.16312	7.89e-13	1.45e-10
COL3A1	1179.49	-9.20127	1.28449	-7.16338	7.87e-13	1.45e-10
SLF1	540.388	-1.0536	0.147223	-7.15654	8.27e-13	1.51e-10
PCDHGB4	1390.77	-1.09998	0.153781	-7.15292	8.5e-13	1.53e-10
TWIST1	28.078	-6.16304	0.863532	-7.13701	9.54e-13	1.7e-10
TNIP1	2868.49	-0.727858	0.102123	-7.12728	1.02e-12	1.81e-10
SLC30A8	112.15	-5.46381	0.770275	-7.09332	1.31e-12	2.28e-10
PLP2	87.2814	-1.88362	0.268544	-7.0142	2.31e-12	3.99e-10
CELSR1	1961.54	-1.45727	0.208149	-7.00109	2.54e-12	4.34e-10
CDH1	126.878	-4.57967	0.656412	-6.97681	3.02e-12	5.1e-10
TPTE2P1	111.042	1.22585	0.17584	6.97139	3.14e-12	5.25e-10
FLI1	78.1332	-3.81296	0.547212	-6.96797	3.22e-12	5.32e-10
PDE4B	3512.18	0.760375	0.109215	6.9622	3.35e-12	5.49e-10
DSP	76.0426	-3.57017	0.513512	-6.95245	3.59e-12	5.83e-10
FOXO1	682.08	-0.846478	0.121977	-6.93966	3.93e-12	6.31e-10
SFTA3	2003.31	-2.84005	0.409397	-6.93715	4e-12	6.36e-10
IFI44L	484.023	-1.64937	0.237813	-6.93558	4.05e-12	6.37e-10
EPAS1	241.397	-2.68284	0.388218	-6.91065	4.82e-12	7.53e-10
TRIM4	566.912	-0.833979	0.12103	-6.89069	5.55e-12	8.58e-10
NAP1L6	15.0466	-3.63489	0.528265	-6.88081	5.95e-12	9.11e-10
POTEF	16.2659	-4.02967	0.58642	-6.87166	6.35e-12	9.62e-10
GPC3	2158.22	-2.24302	0.326568	-6.86847	6.49e-12	9.75e-10
ITPRIP	838.359	-1.03596	0.151025	-6.85954	6.91e-12	1.03e-09
SRGAP2	3276.29	0.481209	0.0702205	6.85283	7.24e-12	1.07e-09
SERTM1	147.343	-2.90098	0.424173	-6.83915	7.97e-12	1.16e-09
SHH	3497.07	-3.24101	0.475975	-6.80921	9.81e-12	1.42e-09
OPHN1	1045.38	0.768797	0.11315	6.79447	1.09e-11	1.56e-09
ST8SIA1	1568.7	0.571832	0.0842454	6.78769	1.14e-11	1.62e-09
PROCR	20.1926	-4.83446	0.713239	-6.77817	1.22e-11	1.72e-09
SYTL2	223.364	0.876098	0.129474	6.76658	1.32e-11	1.84e-09
C1R	147.601	-1.28993	0.19073	-6.76312	1.35e-11	1.87e-09
SLIT2	6199.85	-1.31719	0.19483	-6.7607	1.37e-11	1.89e-09
GLI2	179.871	2.65503	0.393678	6.74417	1.54e-11	2.1e-09
NRN1	340.756	1.51946	0.226327	6.71356	1.9e-11	2.57e-09
FGF10	23.3605	-2.53632	0.377921	-6.71126	1.93e-11	2.59e-09
NHSL2	184.318	-1.39803	0.208705	-6.69858	2.1e-11	2.8e-09
PITPNC1	1856.33	0.663406	0.0992458	6.68447	2.32e-11	3.06e-09
DNAJA4	430.577	-1.00873	0.151133	-6.67447	2.48e-11	3.25e-09
TNFAIP8L3	37.8951	-1.80132	0.27059	-6.65699	2.79e-11	3.63e-09
CSGALNACT1	173.24	1.0615	0.159636	6.64951	2.94e-11	3.79e-09
RGS16	726.531	-0.878542	0.132453	-6.63287	3.29e-11	4.21e-09
FHL1	9106.51	-0.373338	0.0563205	-6.6288	3.38e-11	4.29e-09
FREM1	60.4318	-1.77137	0.267361	-6.6254	3.46e-11	4.36e-09
RAB31	1462.16	1.19215	0.18042	6.60764	3.9e-11	4.87e-09
RASSF2	2503.5	0.803105	0.121805	6.59338	4.3e-11	5.33e-09
DUSP5P1	36.8723	2.08849	0.317898	6.5697	5.04e-11	6.2e-09
C6orf118	155.071	-0.845944	0.129079	-6.55367	5.61e-11	6.85e-09
SPRED2	1190.29	0.64967	0.0995456	6.52636	6.74e-11	8.16e-09
PRDM13	41.2412	-3.67487	0.564608	-6.50871	7.58e-11	9.11e-09
SPARCL1	7866.57	-2.72961	0.422172	-6.46564	1.01e-10	1.2e-08
HSPA1A	1171.09	-2.85754	0.443212	-6.44734	1.14e-10	1.35e-08
RTN4RL1	565.703	0.887497	0.137734	6.44355	1.17e-10	1.36e-08
MYLIP	240.1	-0.592342	0.0919183	-6.44422	1.16e-10	1.36e-08
ZNF558	525.219	-5.62053	0.872558	-6.44144	1.18e-10	1.37e-08
ADCY7	562.394	-0.601865	0.0934565	-6.44005	1.19e-10	1.37e-08
VAMP3	628.903	-0.745368	0.115969	-6.42729	1.3e-10	1.48e-08
NR2F1.AS1	411.768	-2.89527	0.451165	-6.41733	1.39e-10	1.57e-08
DGKG	136.491	-1.58055	0.246367	-6.41542	1.4e-10	1.58e-08
GALNT13	887.008	0.738858	0.115244	6.41123	1.44e-10	1.62e-08
RPE65	113.652	-1.2353	0.19278	-6.4078	1.48e-10	1.64e-08
OTUD7A	193.819	-1.07245	0.167407	-6.40624	1.49e-10	1.65e-08
SULF1	6111.56	-2.8022	0.437567	-6.40403	1.51e-10	1.66e-08
SLC40A1	406.44	-0.741351	0.116036	-6.38895	1.67e-10	1.82e-08
TCTN1	724.477	-0.507619	0.0796826	-6.37051	1.88e-10	2.04e-08
SNCAIP	1594.87	0.518974	0.0815009	6.36771	1.92e-10	2.06e-08
CXorf57	5033.32	-0.721908	0.113527	-6.3589	2.03e-10	2.17e-08
KCNMB1	30.9935	-4.87673	0.768078	-6.34927	2.16e-10	2.29e-08
CTDSP1	485.477	-0.95451	0.150763	-6.33118	2.43e-10	2.56e-08
ADAMTSL1	243.864	-2.11381	0.334029	-6.32822	2.48e-10	2.6e-08
C2orf40	50.0587	-1.97276	0.312022	-6.32249	2.57e-10	2.68e-08
KLF3	976.725	0.641219	0.101484	6.31845	2.64e-10	2.71e-08
HLA.A	3003.53	-1.17226	0.185503	-6.31937	2.63e-10	2.71e-08
LINC01114	79.875	2.50892	0.397702	6.30854	2.82e-10	2.87e-08
B3GALT5.AS1	65.1261	-1.5159	0.2404	-6.30572	2.87e-10	2.91e-08
IGFBP7	95.9828	-2.03537	0.323209	-6.29738	3.03e-10	3.05e-08
SCRG1	228.919	1.25491	0.19935	6.295	3.07e-10	3.08e-08
SPRED3	1482.61	0.885699	0.140776	6.29153	3.14e-10	3.13e-08
EVA1C	63.925	-1.91922	0.306435	-6.26306	3.77e-10	3.73e-08
LRRC61	223.546	-5.30044	0.847075	-6.25734	3.92e-10	3.85e-08
CACHD1	1924.8	0.528909	0.0847007	6.24444	4.25e-10	4.16e-08
DLC1	105.397	-1.2878	0.20652	-6.2357	4.5e-10	4.37e-08
PCDHGA6	63.5891	-2.34027	0.375395	-6.23414	4.54e-10	4.39e-08
ZNF280D	696.547	-0.993272	0.159419	-6.23058	4.65e-10	4.46e-08
CLIC6	49.4309	-3.18019	0.510574	-6.22864	4.7e-10	4.49e-08
PADI2	71.8517	1.79517	0.288582	6.22065	4.95e-10	4.7e-08
DPP7	900.717	-0.674677	0.108705	-6.20648	5.42e-10	5.11e-08
ISLR	173.216	-3.93915	0.634777	-6.20556	5.45e-10	5.11e-08
FAM183A	29.5269	-2.0127	0.32501	-6.19273	5.91e-10	5.51e-08
HES1	862.273	-1.00448	0.162229	-6.19174	5.95e-10	5.52e-08
TSPAN5	3172.17	0.503539	0.0813595	6.18906	6.05e-10	5.58e-08
SOCS2	338.52	1.01179	0.163514	6.18783	6.1e-10	5.59e-08
MIR7.3HG	941.34	-0.997291	0.16131	-6.18244	6.31e-10	5.75e-08
MEST	22002.2	-0.949095	0.153731	-6.17372	6.67e-10	6.05e-08
COL4A1	818.566	-1.50125	0.24321	-6.17265	6.72e-10	6.05e-08
CBLN1	2152.47	-1.04587	0.169828	-6.15841	7.35e-10	6.59e-08
NTN1	17047.2	-0.964597	0.157332	-6.13095	8.74e-10	7.79e-08
SLC12A8	92.839	-1.26064	0.205973	-6.12044	9.33e-10	8.27e-08
TCERG1L	233.988	-2.88928	0.472416	-6.11597	9.6e-10	8.46e-08
PDLIM5	2622.31	-0.910926	0.149038	-6.11205	9.84e-10	8.61e-08
IGSF1	704.549	-0.74861	0.122493	-6.11145	9.87e-10	8.61e-08
GGA2	1473.15	-0.381198	0.0623976	-6.10918	1e-09	8.69e-08
MAGEH1	6026.12	-1.12115	0.18403	-6.09223	1.11e-09	9.61e-08
SPAG6	124.597	-2.6305	0.432032	-6.08868	1.14e-09	9.77e-08
SYNPR	776.787	1.02774	0.16936	6.06837	1.29e-09	1.1e-07
F5	224.105	-3.93323	0.648671	-6.06351	1.33e-09	1.13e-07
LINC00664	23.1244	-2.64592	0.437239	-6.05142	1.44e-09	1.21e-07
PBX3	9489.18	0.752956	0.124451	6.0502	1.45e-09	1.22e-07
MGC70870	12.2995	-4.05518	0.671672	-6.03743	1.57e-09	1.31e-07
GSX1	86.612	-2.44041	0.404416	-6.0344	1.6e-09	1.33e-07
AUTS2	9938.85	0.622973	0.103656	6.00999	1.86e-09	1.54e-07
FGFR2	2132.24	-1.14492	0.191086	-5.99162	2.08e-09	1.71e-07
NKD1	387.934	-1.24664	0.208179	-5.9883	2.12e-09	1.74e-07
PLA2G3	139.351	-1.91252	0.319568	-5.9847	2.17e-09	1.77e-07
DPYD	358.381	-0.885143	0.147957	-5.98242	2.2e-09	1.78e-07
NUP93	7553.13	0.55425	0.0927641	5.97484	2.3e-09	1.86e-07
FAM117A	211.565	-0.75839	0.126983	-5.97238	2.34e-09	1.88e-07
HSPA1L	244.441	-2.13819	0.358397	-5.96598	2.43e-09	1.94e-07
PKIB	746.127	1.12953	0.189377	5.96443	2.45e-09	1.95e-07
CDH20	282.052	1.81395	0.304383	5.95943	2.53e-09	2e-07
IQGAP2	1111.62	-1.12513	0.188892	-5.95646	2.58e-09	2.03e-07
SERTAD4	445.698	1.10812	0.186077	5.95515	2.6e-09	2.04e-07
MIR124.2HG	459.725	1.32588	0.222878	5.94892	2.7e-09	2.11e-07
KCNJ10	130.47	1.64697	0.277024	5.94524	2.76e-09	2.14e-07
NHLRC1	48.4297	-1.4451	0.244045	-5.92145	3.19e-09	2.47e-07
ALG13	1637.47	-0.511373	0.0864198	-5.91731	3.27e-09	2.52e-07
HEYL	32.7442	-2.59216	0.438804	-5.90733	3.48e-09	2.66e-07
PCDHGB6	5284.54	1.03352	0.175031	5.90482	3.53e-09	2.69e-07
TIAM2	206.395	2.00952	0.340741	5.89751	3.69e-09	2.8e-07
NR3C2	154.238	-1.6829	0.286826	-5.86731	4.43e-09	3.34e-07
ZXDA	261.639	-3.7778	0.644104	-5.8652	4.49e-09	3.37e-07
CNTNAP2	15838.8	0.767331	0.131191	5.84896	4.95e-09	3.7e-07
MAPK15	58.2111	-1.40516	0.240623	-5.83968	5.23e-09	3.89e-07
PRTG	618.666	-1.00354	0.172081	-5.8318	5.48e-09	4.06e-07
CD248	57.7926	-2.24233	0.384971	-5.82467	5.72e-09	4.22e-07
NR5A1	30.225	-3.51185	0.603051	-5.82347	5.76e-09	4.23e-07
SPARC	15573.4	-0.924824	0.159228	-5.80817	6.32e-09	4.62e-07
ST6GAL1	1098.24	1.03318	0.177937	5.80644	6.38e-09	4.64e-07
CHST6	409.848	-0.824909	0.142131	-5.80387	6.48e-09	4.69e-07
PCDHGA10	618.557	1.07441	0.185295	5.79838	6.7e-09	4.83e-07
ZBED1	2645.17	0.632867	0.109187	5.79616	6.79e-09	4.87e-07
PAPLN	111.368	-2.48993	0.430533	-5.78338	7.32e-09	5.23e-07
IFIT2	100.716	-1.88619	0.326802	-5.77165	7.85e-09	5.59e-07
CORIN	195.797	-4.35833	0.757187	-5.75595	8.62e-09	6.1e-07
HEPH	419.074	1.22668	0.213215	5.75324	8.75e-09	6.18e-07
PLCL2	1767.59	0.499515	0.08698	5.74287	9.31e-09	6.54e-07
ADCY2	3202.92	-0.624122	0.108803	-5.73624	9.68e-09	6.77e-07
LOC100419583	1654.04	0.489344	0.085391	5.73063	1e-08	6.97e-07
MYH14	247.206	-3.47995	0.609683	-5.70779	1.14e-08	7.9e-07
CDKN2B	30.8027	-1.84888	0.323917	-5.7079	1.14e-08	7.9e-07
IGFBPL1	14238.6	0.911101	0.15981	5.70117	1.19e-08	8.18e-07
STIM2	1088.56	0.336082	0.0589909	5.69718	1.22e-08	8.34e-07
COL24A1	35.923	-2.08719	0.366558	-5.69403	1.24e-08	8.46e-07
MOXD1	1696.93	1.22514	0.215454	5.6863	1.3e-08	8.81e-07
WNT5A	399.016	-2.20419	0.38777	-5.68428	1.31e-08	8.86e-07
SGCE	1121.96	-0.36572	0.0643472	-5.68354	1.32e-08	8.86e-07
SLC25A53	302.379	-0.564925	0.0994028	-5.68319	1.32e-08	8.86e-07
DGKB	459.037	-0.984984	0.173372	-5.68132	1.34e-08	8.93e-07
PLEKHA4	75.9781	-1.98168	0.349351	-5.67246	1.41e-08	9.36e-07
DPP6	3262.92	-0.618165	0.109041	-5.66913	1.44e-08	9.51e-07
EBF1	228.378	2.81086	0.496623	5.65996	1.51e-08	9.99e-07
COL12A1	35.8387	-2.16499	0.383311	-5.64811	1.62e-08	1.07e-06
ARSI	16.2918	-3.12325	0.553348	-5.64428	1.66e-08	1.09e-06
PCAT7	60.6775	-1.20716	0.213902	-5.64351	1.67e-08	1.09e-06
CCND1	3824.68	-1.01967	0.180738	-5.64167	1.68e-08	1.09e-06
TEX15	85.6991	-2.01103	0.356694	-5.63798	1.72e-08	1.11e-06
LOC102724623	44.627	1.96398	0.348433	5.63662	1.73e-08	1.12e-06
PACS1	6029.9	0.437701	0.0776985	5.63333	1.77e-08	1.13e-06
WIPF3	1190.8	1.07997	0.191866	5.6288	1.81e-08	1.16e-06
LONRF1	1840.19	0.426988	0.0758614	5.62853	1.82e-08	1.16e-06
NTRK3	1405.89	0.585903	0.104117	5.62734	1.83e-08	1.16e-06
PTCHD1	1195.32	1.07675	0.191351	5.62708	1.83e-08	1.16e-06
ERRFI1	1182.01	0.506843	0.0901111	5.62464	1.86e-08	1.17e-06
LRCH1	714.933	0.502563	0.0894273	5.61979	1.91e-08	1.2e-06
ELMOD1	826.904	0.898207	0.15997	5.61485	1.97e-08	1.23e-06
CD36	431.816	-1.79777	0.320408	-5.61087	2.01e-08	1.25e-06
BMP3	24.4482	2.07399	0.369921	5.60658	2.06e-08	1.28e-06
SNAP23	175.938	-0.950719	0.169597	-5.60575	2.07e-08	1.28e-06
BOLA3.AS1	1054.74	0.430602	0.0768369	5.6041	2.09e-08	1.29e-06
FRMPD3	892.949	-0.93096	0.166197	-5.60154	2.12e-08	1.3e-06
CACNG4	9294.94	0.584134	0.104305	5.60025	2.14e-08	1.31e-06
RIN2	655.047	0.35466	0.0633592	5.59762	2.17e-08	1.32e-06
ZNF582	155.846	-0.668658	0.119617	-5.58999	2.27e-08	1.37e-06
CASZ1	283.485	-1.23175	0.220451	-5.5874	2.3e-08	1.39e-06
PPP2R2B	5982.17	0.618592	0.110732	5.5864	2.32e-08	1.39e-06
DRAXIN	1124.73	0.652292	0.116838	5.58286	2.37e-08	1.42e-06
ZFAND6	3492.42	-0.339192	0.0608391	-5.57524	2.47e-08	1.47e-06
LINC00884	46.0037	-1.20654	0.216465	-5.57382	2.49e-08	1.48e-06
KIRREL	2383.04	-0.403578	0.0724289	-5.57205	2.52e-08	1.49e-06
LGR4	1596.42	-0.575771	0.103411	-5.56777	2.58e-08	1.52e-06
MSX1	39.7879	-1.20747	0.217214	-5.55891	2.71e-08	1.59e-06
NPY1R	199.244	1.25575	0.225879	5.5594	2.71e-08	1.59e-06
COL6A3	61.9287	-5.34214	0.961406	-5.55659	2.75e-08	1.61e-06
MAGT1	1401.43	-0.932485	0.168025	-5.54967	2.86e-08	1.66e-06
IGLON5	4960.55	0.835266	0.150768	5.54008	3.02e-08	1.75e-06
OLFML3	33.1155	-2.82253	0.510575	-5.52813	3.24e-08	1.87e-06
RTN4	31857.6	0.386302	0.0699212	5.52481	3.3e-08	1.9e-06
CREB3L2	599.121	-0.641859	0.116193	-5.52408	3.31e-08	1.9e-06
ARHGAP18	322.933	-0.887216	0.160825	-5.51665	3.46e-08	1.97e-06
CPLX3	381	-1.64869	0.299003	-5.51394	3.51e-08	2e-06
KIF3B	7496.97	0.371681	0.0674504	5.51043	3.58e-08	2.02e-06
KCNQ3	881.227	1.0939	0.198509	5.51057	3.58e-08	2.02e-06
ARAF	709.521	-0.824403	0.149596	-5.51087	3.57e-08	2.02e-06
SPON1	12435.9	-2.93377	0.532902	-5.50528	3.69e-08	2.07e-06
LDOC1	2894.51	-5.76367	1.04831	-5.49805	3.84e-08	2.15e-06
PAPSS2	168.929	-2.66648	0.485811	-5.48872	4.05e-08	2.26e-06
MARVELD1	434.292	-0.752755	0.137177	-5.48748	4.08e-08	2.26e-06
EEF2K	890.769	-0.583448	0.106323	-5.48749	4.08e-08	2.26e-06
FAM198A	16.6633	-1.9887	0.363043	-5.47787	4.3e-08	2.38e-06
PCDHGA11	158.614	-1.92692	0.351909	-5.47562	4.36e-08	2.4e-06
PCDH17	6114.51	-0.703464	0.128554	-5.47211	4.45e-08	2.44e-06
SOX21	1751.2	-0.5156	0.0943065	-5.46728	4.57e-08	2.5e-06
UNCX	40.1269	2.40358	0.439851	5.46454	4.64e-08	2.53e-06
MEIS1	532.164	1.66619	0.305347	5.45671	4.85e-08	2.63e-06
SLC38A5	42.0629	-1.53612	0.281607	-5.45483	4.9e-08	2.65e-06
EPS8L1	306.344	1.13891	0.20884	5.45349	4.94e-08	2.66e-06
CFAP57	85.6369	-0.926938	0.169994	-5.45278	4.96e-08	2.66e-06
PPARGC1A	399.585	0.64598	0.119162	5.421	5.93e-08	3.17e-06
TNFRSF21	1972.65	0.484496	0.0894395	5.41702	6.06e-08	3.23e-06
FOXO3	2272.67	0.43016	0.0794266	5.41581	6.1e-08	3.25e-06
BUB3	5050.07	-0.540734	0.0998994	-5.41278	6.21e-08	3.29e-06
LGALS1	63.389	-1.75645	0.324627	-5.41068	6.28e-08	3.31e-06
NUDT12	1333.52	-0.821242	0.151783	-5.41064	6.28e-08	3.31e-06
NR2F1	4266.18	-2.95078	0.546553	-5.39889	6.71e-08	3.52e-06
RASEF	38.9945	-1.77627	0.329142	-5.39667	6.79e-08	3.55e-06
KCNJ5	60.5934	-2.22857	0.413653	-5.38752	7.14e-08	3.73e-06
GRAMD3	71.4997	-3.04863	0.566366	-5.38279	7.33e-08	3.81e-06
ZNF471	530.541	-4.76431	0.886251	-5.37581	7.62e-08	3.95e-06
HADH	1125.21	-0.45849	0.0853317	-5.37303	7.74e-08	4e-06
ANXA1	264.681	-3.56032	0.663209	-5.36832	7.95e-08	4.09e-06
PREP	2110.71	0.273092	0.050906	5.36462	8.11e-08	4.17e-06
APOE	162.823	-1.45585	0.271559	-5.36109	8.27e-08	4.23e-06
QPCT	195.952	0.820553	0.153139	5.35824	8.4e-08	4.29e-06
IGFBP5	10273.1	-1.83915	0.343525	-5.35377	8.61e-08	4.38e-06
KIRREL3	979.389	1.01532	0.189713	5.35184	8.71e-08	4.39e-06
ANO4	269.76	0.720882	0.134684	5.3524	8.68e-08	4.39e-06
DCBLD1	73.2545	0.913256	0.170631	5.35221	8.69e-08	4.39e-06
KIAA1211	7399.54	0.375333	0.0701543	5.3501	8.79e-08	4.42e-06
PSMD5	887.579	-0.653277	0.122167	-5.34741	8.92e-08	4.47e-06
HEY2	50.0393	-1.95213	0.365505	-5.34093	9.25e-08	4.62e-06
MPPED2	4781.94	0.911141	0.170854	5.33287	9.67e-08	4.81e-06
CTSF	502.803	-4.65231	0.872657	-5.3312	9.76e-08	4.84e-06
FYN	9884.23	0.254034	0.0476712	5.32889	9.88e-08	4.89e-06
MYOF	316.624	-3.41552	0.641259	-5.32627	1e-07	4.94e-06
COL9A2	523.906	-0.78592	0.147593	-5.3249	1.01e-07	4.95e-06
EMX2OS	137.596	2.06625	0.388042	5.32483	1.01e-07	4.95e-06
MAP4	14081.9	0.391176	0.0736207	5.31339	1.08e-07	5.26e-06
ELOVL1	199.166	-0.660235	0.124321	-5.31074	1.09e-07	5.31e-06
BTN3A2	163.245	-1.31764	0.248125	-5.31038	1.09e-07	5.31e-06
EMP3	108.355	-1.35165	0.254775	-5.30524	1.13e-07	5.45e-06
SAMD3	80.1705	1.14375	0.21579	5.3003	1.16e-07	5.58e-06
TPPP3	424.38	-1.15243	0.217629	-5.29539	1.19e-07	5.72e-06
SOX14	258.494	-2.79681	0.528497	-5.29201	1.21e-07	5.81e-06
ALDH9A1	3253.44	-0.745882	0.140994	-5.29017	1.22e-07	5.84e-06
SCUBE3	707.002	0.400022	0.0756181	5.29003	1.22e-07	5.84e-06
ABTB2	510.725	0.837486	0.158338	5.28921	1.23e-07	5.85e-06
GFRA1	2488.86	1.41392	0.267587	5.28395	1.26e-07	6e-06
FGF8	40.2416	-3.74916	0.710411	-5.27746	1.31e-07	6.2e-06
ZNF667.AS1	1343.1	-5.11138	0.969093	-5.27439	1.33e-07	6.28e-06
MYC	340.556	0.743314	0.141073	5.26901	1.37e-07	6.45e-06
IQGAP1	1336.97	-0.994149	0.188718	-5.26789	1.38e-07	6.45e-06
GALNT1	4520.41	0.526966	0.100026	5.26827	1.38e-07	6.45e-06
TMEM63A	59.4254	-1.7662	0.335749	-5.26048	1.44e-07	6.7e-06
AGT	159.201	-5.24702	0.999482	-5.24973	1.52e-07	7.07e-06
LMCD1	200.602	-1.81093	0.34497	-5.24954	1.52e-07	7.07e-06
ARSJ	13.8286	-3.9332	0.749585	-5.24717	1.54e-07	7.14e-06
ZNF248	667.139	-2.36856	0.4516	-5.24481	1.56e-07	7.21e-06
WT1	48.8861	-2.71984	0.518681	-5.24376	1.57e-07	7.23e-06
LUM	93.2594	-5.84693	1.11686	-5.23514	1.65e-07	7.56e-06
LRIG1	3118.56	-1.06931	0.204418	-5.23103	1.69e-07	7.7e-06
AGBL4	93.2943	-1.16356	0.22269	-5.22502	1.74e-07	7.94e-06
RIMKLB	3282.2	0.641268	0.122833	5.22063	1.78e-07	8.08e-06
FAM49A	2328.21	0.529173	0.10136	5.22072	1.78e-07	8.08e-06
KIF19	37.359	-1.93969	0.371593	-5.21993	1.79e-07	8.09e-06
STS	722.624	0.587089	0.112487	5.21919	1.8e-07	8.1e-06
LINC01307	35.6384	-2.30264	0.441297	-5.21789	1.81e-07	8.13e-06
C11orf70	76.5779	-1.24689	0.239293	-5.21072	1.88e-07	8.43e-06
CAMKK2	2450.12	0.51921	0.0996521	5.21023	1.89e-07	8.43e-06
FLNB	1168.88	-0.8037	0.154375	-5.20617	1.93e-07	8.59e-06
DCX	78550.1	0.614207	0.118045	5.20317	1.96e-07	8.71e-06
TH	435.03	-1.16452	0.223899	-5.2011	1.98e-07	8.78e-06
SLC35F1	3817.73	0.695288	0.133764	5.19787	2.02e-07	8.91e-06
SLC18A2	347.45	0.617354	0.118785	5.19722	2.02e-07	8.92e-06
OTOR	15.8998	-4.16455	0.802343	-5.19048	2.1e-07	9.21e-06
PRPH2	30.1563	-2.30831	0.444744	-5.19021	2.1e-07	9.21e-06
ZNF835	291.523	-4.01843	0.775086	-5.1845	2.17e-07	9.47e-06
AHRR	173.98	-0.989634	0.191003	-5.18124	2.2e-07	9.61e-06
TRIL	546.118	-1.27416	0.245987	-5.17977	2.22e-07	9.66e-06
EFHD1	327.362	-1.13152	0.218592	-5.17639	2.26e-07	9.81e-06
SCPEP1	259.273	-1.07563	0.207976	-5.17188	2.32e-07	1e-05
UNC5B	989.876	-1.28654	0.248872	-5.16949	2.35e-07	1.01e-05
EGLN3	1196.6	-1.34128	0.259778	-5.16319	2.43e-07	1.04e-05
EDNRA	27.6477	-2.74618	0.531915	-5.1628	2.43e-07	1.04e-05
C10orf105	127.667	-1.91162	0.370808	-5.15528	2.53e-07	1.08e-05
TLN1	1851.78	-0.783467	0.152255	-5.14575	2.66e-07	1.14e-05
TRABD2B	102.227	-4.48173	0.871095	-5.14494	2.68e-07	1.14e-05
IL13RA2	319.278	-1.25475	0.244046	-5.14145	2.73e-07	1.16e-05
NPY2R	230.886	1.73238	0.337354	5.13521	2.82e-07	1.19e-05
PRR5L	533.441	-1.21945	0.237544	-5.13358	2.84e-07	1.2e-05
MVP	196.844	-1.06655	0.20778	-5.13308	2.85e-07	1.2e-05
SHISA6	964.426	1.47906	0.288216	5.13178	2.87e-07	1.21e-05
SFT2D3	799.057	-0.367911	0.0718049	-5.12376	3e-07	1.26e-05
OPTN	4154.14	0.383521	0.0749794	5.11501	3.14e-07	1.31e-05
KLF9	329.477	-0.814793	0.159292	-5.11509	3.14e-07	1.31e-05
ID1	36.0668	-1.68449	0.329377	-5.11417	3.15e-07	1.31e-05
TBX10	24.4059	3.07249	0.601124	5.11125	3.2e-07	1.33e-05
FNBP1L	17061.4	0.458852	0.0898153	5.10884	3.24e-07	1.34e-05
RTCA	1690.75	0.247077	0.0483698	5.10808	3.25e-07	1.34e-05
THOC7	1065.59	0.343003	0.0671425	5.10857	3.25e-07	1.34e-05
ZBED6CL	52.686	-3.34465	0.654717	-5.10854	3.25e-07	1.34e-05
EFNB3	16674	-0.751223	0.147084	-5.10745	3.27e-07	1.34e-05
LRFN5	964.02	0.634911	0.124415	5.10319	3.34e-07	1.36e-05
CD68	97.0757	-1.11526	0.218716	-5.09915	3.41e-07	1.39e-05
B3GALNT1	3655.93	0.77732	0.152457	5.09861	3.42e-07	1.39e-05
ZFP28	1364.86	-4.07034	0.8005	-5.08475	3.68e-07	1.49e-05
WDR49	22.056	-2.29767	0.451868	-5.08482	3.68e-07	1.49e-05
PLEKHA2	381.18	0.767054	0.150911	5.08284	3.72e-07	1.5e-05
ZNF736	406.301	-5.17735	1.01926	-5.0795	3.78e-07	1.52e-05
LOC101928414	19.1931	-2.11058	0.416389	-5.06877	4e-07	1.61e-05
LOC100128398	394.171	0.514126	0.101439	5.06831	4.01e-07	1.61e-05
GOLGA2P7	57.1712	-1.07029	0.211203	-5.06758	4.03e-07	1.61e-05
MGAT5	6481.36	0.511456	0.101084	5.05973	4.2e-07	1.67e-05
MAK	69.1746	-0.954726	0.188716	-5.05907	4.21e-07	1.68e-05
DGKK	773.812	-0.93402	0.184646	-5.05843	4.23e-07	1.68e-05
KCNIP4	1009.85	0.752051	0.148793	5.05436	4.32e-07	1.71e-05
SLITRK4	1475.8	-4.92694	0.974875	-5.05392	4.33e-07	1.71e-05
COL1A1	167.388	-3.61635	0.715799	-5.05219	4.37e-07	1.72e-05
SLC44A1	1721.02	-0.698434	0.138261	-5.05156	4.38e-07	1.72e-05
ZNF667	666.445	-4.14605	0.8211	-5.04939	4.43e-07	1.74e-05
PLCH1	1000.97	1.06815	0.211555	5.04906	4.44e-07	1.74e-05
MYT1	4685.82	0.366104	0.0725291	5.04768	4.47e-07	1.74e-05
KRT8	99.4379	-1.86613	0.370524	-5.03647	4.74e-07	1.84e-05
KLF5	143.666	-0.93972	0.186569	-5.03686	4.73e-07	1.84e-05
CYTL1	13.1565	-2.18004	0.433438	-5.02964	4.91e-07	1.9e-05
GAREM	377.785	0.954022	0.190093	5.0187	5.2e-07	2.01e-05
NLGN4Y	397.818	1.85536	0.36971	5.01842	5.21e-07	2.01e-05
B4GALT1	175.79	-0.789638	0.15737	-5.01773	5.23e-07	2.01e-05
PTBP1	3299.87	-0.596741	0.119075	-5.01147	5.4e-07	2.07e-05
CASC9	66.8793	-1.21227	0.241899	-5.01149	5.4e-07	2.07e-05
SLCO3A1	1206.96	0.76742	0.15319	5.00958	5.45e-07	2.08e-05
DCN	236.341	-5.43434	1.08558	-5.00595	5.56e-07	2.11e-05
SLITRK6	790.385	1.77678	0.354926	5.00605	5.56e-07	2.11e-05
BEND3P3	512.805	4.2163	0.842671	5.0035	5.63e-07	2.13e-05
P2RX3	88.792	-2.09279	0.418311	-5.00295	5.65e-07	2.14e-05
HERC3	1537.33	0.464074	0.0927909	5.00129	5.69e-07	2.15e-05
NTS	123.051	-1.18787	0.23772	-4.99693	5.83e-07	2.19e-05
FAM155A	2163.05	0.742944	0.148702	4.99619	5.85e-07	2.19e-05
MAPK14	2036.74	-0.281726	0.0563905	-4.99598	5.85e-07	2.19e-05
AGO4	3476.17	0.430169	0.086185	4.99123	6e-07	2.24e-05
DRP2	393.178	0.7778	0.155901	4.98908	6.07e-07	2.26e-05
ARHGAP42	172.285	-1.24635	0.249861	-4.98816	6.1e-07	2.27e-05
PON2	1562.07	-0.723158	0.145056	-4.98538	6.18e-07	2.3e-05
LINC01138	334.025	0.590951	0.11871	4.9781	6.42e-07	2.38e-05
STK35	1279.09	0.30595	0.0615195	4.97323	6.58e-07	2.43e-05
KIAA1024L	12.3928	-2.34969	0.472951	-4.96814	6.76e-07	2.49e-05
TBC1D4	372.41	-0.809114	0.162884	-4.96742	6.78e-07	2.5e-05
WDR47	6295.19	0.403503	0.0813041	4.96288	6.95e-07	2.55e-05
CRYZ	451.242	-4.38039	0.883867	-4.95594	7.2e-07	2.63e-05
UBASH3B	1184.57	0.838174	0.169135	4.95564	7.21e-07	2.63e-05
ARC	680.547	-0.951537	0.192082	-4.95382	7.28e-07	2.65e-05
ZNF285	517.067	-3.15819	0.637733	-4.95222	7.34e-07	2.67e-05
CDKL2	1174.93	0.620869	0.125496	4.94732	7.52e-07	2.73e-05
TRIM25	337.446	-0.882148	0.178394	-4.94493	7.62e-07	2.75e-05
COL5A3	29.047	-2.98655	0.603944	-4.94509	7.61e-07	2.75e-05
LOC441204	153.184	0.54681	0.110578	4.94502	7.61e-07	2.75e-05
DNASE2	513.084	-1.0973	0.221989	-4.94301	7.69e-07	2.77e-05
PPP1R18	4103.06	0.489156	0.0990114	4.9404	7.8e-07	2.8e-05
PRKCDBP	21.6472	-2.85279	0.577936	-4.93617	7.97e-07	2.85e-05
FAM124A	383.281	0.60925	0.123426	4.93617	7.97e-07	2.85e-05
PURA	544.874	-0.449707	0.0912477	-4.92842	8.29e-07	2.96e-05
PLOD1	2612.84	-0.52244	0.10607	-4.92541	8.42e-07	2.98e-05
ZNF267	318.135	-0.900092	0.182734	-4.92569	8.41e-07	2.98e-05
BMP7	3278.08	-1.18257	0.240067	-4.92603	8.39e-07	2.98e-05
FERD3L	89.1071	-4.89566	0.994426	-4.9231	8.52e-07	3.01e-05
SNX27	2599.36	0.241083	0.04902	4.91806	8.74e-07	3.08e-05
CAV1	22.3119	-2.90289	0.590416	-4.91668	8.8e-07	3.09e-05
KIF13B	523.952	-0.406897	0.0827558	-4.91684	8.8e-07	3.09e-05
QRFPR	21.4462	-2.26517	0.461013	-4.91346	8.95e-07	3.14e-05
KCTD10	3326.1	0.511324	0.10419	4.90762	9.22e-07	3.22e-05
OLFML2A	172.97	-2.63114	0.536187	-4.90713	9.24e-07	3.22e-05
HTR5A.AS1	43.4255	-1.59418	0.324915	-4.90647	9.27e-07	3.23e-05
ZNF521	3767.06	0.72668	0.148184	4.90389	9.4e-07	3.26e-05
TRDN	23.3635	-3.2063	0.653772	-4.90431	9.38e-07	3.26e-05
IL17RC	202.132	-0.901573	0.18399	-4.90011	9.58e-07	3.31e-05
LZTS1	2727.66	0.718142	0.146547	4.90043	9.56e-07	3.31e-05
SALL3	988.351	1.40142	0.286051	4.89918	9.62e-07	3.32e-05
DHRS2	76.8689	1.1448	0.233697	4.89863	9.65e-07	3.32e-05
TRIB3	1555.04	-0.853153	0.174215	-4.89712	9.73e-07	3.34e-05
MOCOS	24.3073	-1.72169	0.351636	-4.89624	9.77e-07	3.34e-05
VASN	86.6486	-1.24116	0.253649	-4.89321	9.92e-07	3.39e-05
NUTM2B.AS1	229.269	3.37339	0.690176	4.88772	1.02e-06	3.48e-05
TGFBR2	14.971	-2.95471	0.604574	-4.88726	1.02e-06	3.48e-05
SLC31A1	2251.11	-0.605445	0.123931	-4.88535	1.03e-06	3.5e-05
LRP8	3104.77	0.401875	0.0823857	4.87797	1.07e-06	3.62e-05
CXCL12	82.4203	-1.60195	0.328373	-4.87844	1.07e-06	3.62e-05
DDAH2	5341.51	0.552781	0.113315	4.87828	1.07e-06	3.62e-05
C11orf74	733.405	0.522354	0.107253	4.87029	1.11e-06	3.75e-05
SP6	73.0598	0.979872	0.20148	4.86337	1.15e-06	3.88e-05
SNORD116.22	20.4143	-1.62821	0.334932	-4.86131	1.17e-06	3.9e-05
BRS3	55.6198	-2.48026	0.510189	-4.86146	1.17e-06	3.9e-05
HTR7	61.8971	1.34705	0.277195	4.85958	1.18e-06	3.93e-05
SSBP3	8650.95	0.346075	0.0712351	4.85822	1.18e-06	3.95e-05
STX7	7625.27	0.373201	0.0768415	4.85677	1.19e-06	3.97e-05
TLE6	484.553	-1.27136	0.261968	-4.8531	1.22e-06	4.03e-05
FNDC4	1720.67	0.586846	0.12099	4.85036	1.23e-06	4.07e-05
MTSS1	8328.67	0.465077	0.0958789	4.85067	1.23e-06	4.07e-05
CRABP2	2849.85	-1.12575	0.232165	-4.84893	1.24e-06	4.09e-05
VGF	5882.62	1.09391	0.225619	4.8485	1.24e-06	4.09e-05
LINC00476	499.932	0.604884	0.125055	4.83695	1.32e-06	4.33e-05
AKAP5	385.101	0.682694	0.141195	4.83511	1.33e-06	4.36e-05
PROX1	279.767	-1.69593	0.35088	-4.83338	1.34e-06	4.39e-05
C9orf171	69.8261	-1.86677	0.386455	-4.83048	1.36e-06	4.45e-05
ATP6V1B2	8619.69	0.256074	0.0530632	4.82583	1.39e-06	4.54e-05
FHL2	43.9813	-1.14008	0.236325	-4.82421	1.41e-06	4.57e-05
ASAP2	2432.27	0.322234	0.0668046	4.82353	1.41e-06	4.58e-05
BACH2	3795.16	0.663743	0.137641	4.82227	1.42e-06	4.6e-05
AGAP7P	13.0467	1.96027	0.40692	4.81732	1.45e-06	4.69e-05
ANO5	489.218	0.636914	0.132222	4.81702	1.46e-06	4.69e-05
SLA	71.3556	3.09668	0.642804	4.81746	1.45e-06	4.69e-05
GSE1	7445.49	-0.343403	0.0713061	-4.8159	1.47e-06	4.71e-05
ANGPTL2	401.017	-0.818169	0.169899	-4.81563	1.47e-06	4.71e-05
FAM222B	2525.69	0.339118	0.0704408	4.81422	1.48e-06	4.73e-05
GPR161	4376.68	0.662679	0.137801	4.80894	1.52e-06	4.85e-05
F13A1	16.1704	-4.59463	0.955946	-4.80637	1.54e-06	4.9e-05
KIFAP3	8366.1	0.411488	0.0856481	4.8044	1.55e-06	4.94e-05
URB1.AS1	44.7155	-1.46641	0.305379	-4.80193	1.57e-06	4.99e-05
AKAP14	62.5657	-1.35447	0.282571	-4.79338	1.64e-06	5.2e-05
ACVR1	687.32	0.3287	0.0686622	4.78721	1.69e-06	5.35e-05
ZNF300P1	39.8875	-5.84276	1.2212	-4.78443	1.71e-06	5.4e-05
GNRH1	1346.94	3.15786	0.660019	4.7845	1.71e-06	5.4e-05
SLCO1C1	53.8717	-1.77339	0.370744	-4.78334	1.72e-06	5.42e-05
ELOVL5	4651.63	-0.407368	0.085198	-4.78143	1.74e-06	5.46e-05
NEDD4	420.835	-0.992519	0.207726	-4.77802	1.77e-06	5.53e-05
IL17RD	5667.06	0.650534	0.136147	4.77819	1.77e-06	5.53e-05
EFNB2	4377.64	1.08692	0.227533	4.77697	1.78e-06	5.55e-05
ADAMTS18	39.1572	-1.67087	0.34983	-4.77625	1.79e-06	5.56e-05
FOXD1	26.4551	-2.14097	0.448349	-4.77523	1.8e-06	5.58e-05
FOXA1	275.045	-5.31634	1.11359	-4.77404	1.81e-06	5.59e-05
SP8	799.601	2.31349	0.484601	4.774	1.81e-06	5.59e-05
REPS1	2657.64	0.271248	0.0568553	4.77085	1.83e-06	5.67e-05
NSUN5	1312.71	0.550049	0.115352	4.76842	1.86e-06	5.73e-05
FOXN2	777.556	-0.524763	0.110199	-4.76197	1.92e-06	5.9e-05
FAM181B	1071.79	0.926964	0.194712	4.7607	1.93e-06	5.93e-05
DLX5	1866.5	0.765231	0.160756	4.76022	1.93e-06	5.93e-05
FRMD6	171.085	-0.872258	0.183272	-4.75937	1.94e-06	5.95e-05
MACROD2	823.655	0.495138	0.104097	4.75653	1.97e-06	6.01e-05
NEFM	8382.34	1.1417	0.240017	4.75674	1.97e-06	6.01e-05
HYMAI	15.8598	-1.55339	0.327202	-4.7475	2.06e-06	6.27e-05
FNDC1	17.2725	-2.41013	0.508515	-4.73954	2.14e-06	6.51e-05
PTDSS1	2866.1	0.36472	0.076966	4.73871	2.15e-06	6.52e-05
CNN2	1276.64	1.28866	0.272124	4.73557	2.18e-06	6.61e-05
SLC7A2	136.329	-1.72457	0.364194	-4.73531	2.19e-06	6.61e-05
RMDN1	1662.47	-0.441193	0.0932376	-4.73193	2.22e-06	6.7e-05
PRPS1	3252.48	-0.266275	0.0562717	-4.73195	2.22e-06	6.7e-05
PCDHA9	50.5128	1.01732	0.215089	4.72976	2.25e-06	6.75e-05
DLEC1	24.3568	-1.49598	0.31648	-4.72694	2.28e-06	6.84e-05
RSPH1	181.122	-1.29174	0.273459	-4.7237	2.32e-06	6.93e-05
ONECUT1	96.5126	1.74567	0.369675	4.72218	2.33e-06	6.97e-05
OAS3	20.0235	-1.74937	0.370518	-4.72142	2.34e-06	6.99e-05
GRK5	1875.29	0.528376	0.111928	4.7207	2.35e-06	7e-05
TMEM114	38.2637	-3.28594	0.696268	-4.71936	2.37e-06	7.03e-05
KCNQ5	274.774	-0.984921	0.208755	-4.71808	2.38e-06	7.06e-05
FRMD7	19.7306	2.45094	0.519723	4.71586	2.41e-06	7.13e-05
FAT1	5812.27	-0.578444	0.122731	-4.7131	2.44e-06	7.21e-05
RNF157	3485.45	0.277519	0.0589219	4.70995	2.48e-06	7.31e-05
MAGI2	2275.41	0.46472	0.0986809	4.70932	2.49e-06	7.32e-05
NELL2	7094.33	-0.543309	0.115515	-4.70338	2.56e-06	7.52e-05
MLEC	7277.46	-0.36721	0.0781026	-4.70164	2.58e-06	7.57e-05
AMIGO2	1142.18	-0.596215	0.126831	-4.70086	2.59e-06	7.59e-05
ZNF124	495.937	0.479382	0.102002	4.69975	2.6e-06	7.62e-05
ELAVL3	16409.7	0.37569	0.0799498	4.69908	2.61e-06	7.63e-05
SH3BP5	1421.23	0.739763	0.157479	4.69752	2.63e-06	7.67e-05
BBOX1	51.2914	-4.07787	0.868253	-4.69664	2.64e-06	7.69e-05
RYR2	110.232	1.0697	0.227816	4.69545	2.66e-06	7.72e-05
FABP5	2639.5	0.565742	0.120542	4.69334	2.69e-06	7.79e-05
PDGFC	458.731	-1.11446	0.237594	-4.69061	2.72e-06	7.88e-05
FAM92B	140.165	-1.11963	0.238948	-4.68568	2.79e-06	8.06e-05
FAM168A	13935.1	0.27057	0.057769	4.68365	2.82e-06	8.1e-05
RNF165	4834.2	0.497586	0.106239	4.68363	2.82e-06	8.1e-05
POU3F3	6449.02	1.72214	0.367712	4.68339	2.82e-06	8.1e-05
CMPK2	192.891	0.779602	0.166501	4.68228	2.84e-06	8.13e-05
SMPDL3B	23.5646	-1.6691	0.356515	-4.6817	2.85e-06	8.14e-05
COL14A1	183.621	-3.24681	0.6936	-4.6811	2.85e-06	8.15e-05
MAN2A1	520.391	-0.47484	0.101462	-4.67998	2.87e-06	8.18e-05
SCRT1	2171.34	0.707693	0.151313	4.67701	2.91e-06	8.29e-05
OAF	100.928	-1.30902	0.279933	-4.67619	2.92e-06	8.31e-05
LTBP1	927.275	-0.787138	0.168516	-4.67098	3e-06	8.49e-05
ADAM19	846.1	0.570366	0.122112	4.67086	3e-06	8.49e-05
S1PR1	1357.26	-0.820009	0.175618	-4.66929	3.02e-06	8.54e-05
SOX21.AS1	670.403	-0.610765	0.130819	-4.66876	3.03e-06	8.54e-05
PLOD2	2702.3	-0.992408	0.212559	-4.66885	3.03e-06	8.54e-05
MAMDC2	53.6078	-2.0867	0.447376	-4.6643	3.1e-06	8.71e-05
TTC28	3475.55	0.522675	0.112128	4.6614	3.14e-06	8.82e-05
NEUROG3	10.8824	-4.2049	0.902383	-4.65977	3.17e-06	8.87e-05
HSPB6	40.3152	-1.22073	0.262109	-4.65733	3.2e-06	8.96e-05
RYR1	88.7775	-1.24485	0.267314	-4.65689	3.21e-06	8.97e-05
HCG23	43.8054	-1.18045	0.253621	-4.65437	3.25e-06	9.06e-05
SAMD11	73.4426	1.03059	0.221676	4.64909	3.33e-06	9.25e-05
PARP14	125.172	-1.0372	0.223075	-4.64956	3.33e-06	9.25e-05
CROT	660.902	0.523234	0.112548	4.64897	3.34e-06	9.25e-05
GLUD1	6207.71	-0.309518	0.066588	-4.64826	3.35e-06	9.27e-05
LPAR1	287.132	-0.818544	0.176118	-4.6477	3.36e-06	9.28e-05
MIDN	7766.42	0.331291	0.071305	4.64612	3.38e-06	9.31e-05
MRAS	3198.21	0.517448	0.111374	4.64604	3.38e-06	9.31e-05
MTHFD2L	266.546	-0.512434	0.110282	-4.64658	3.37e-06	9.31e-05
IL11RA	208.516	0.524668	0.112945	4.64535	3.4e-06	9.32e-05
PCDHB5	1406.33	-3.20405	0.691969	-4.63034	3.65e-06	0.000100062
PRDM4	2103.11	0.261588	0.0565082	4.6292	3.67e-06	0.000100443
SP9	554.27	1.0528	0.227676	4.62413	3.76e-06	0.000102586
MCUR1	1991.03	-0.256894	0.0555545	-4.62418	3.76e-06	0.000102586
NKX2.1	7769.95	-1.68064	0.363488	-4.62364	3.77e-06	0.000102635
CFAP61	81.899	-1.12553	0.243446	-4.62333	3.78e-06	0.000102635
RASGEF1B	1147.66	0.775947	0.167883	4.62195	3.8e-06	0.000103147
HCN1	150.171	-1.14713	0.248315	-4.61965	3.84e-06	0.000104123
CXXC5	1930.54	0.502707	0.108854	4.61818	3.87e-06	0.000104691
LINC00623	533.638	0.764747	0.165617	4.61755	3.88e-06	0.000104834
RAMP2.AS1	279.014	-0.540214	0.117002	-4.61712	3.89e-06	0.000104874
LOC654342	59.7711	-1.99856	0.433253	-4.61292	3.97e-06	0.000106841
DLX6	1486.41	1.04592	0.226857	4.61049	4.02e-06	0.000107919
LOC101927969	67.1386	-2.03812	0.442129	-4.60978	4.03e-06	0.000108108
ZFHX4.AS1	198.408	0.796297	0.172756	4.60937	4.04e-06	0.000108143
TOM1L1	167.233	-0.81609	0.177073	-4.60877	4.05e-06	0.00010828
POMC	82.9755	-2.44795	0.531535	-4.60543	4.12e-06	0.000109849
ZNF718	596.138	0.460275	0.100005	4.60252	4.17e-06	0.000111211
CLCN4	4847.15	0.470893	0.102378	4.59954	4.23e-06	0.000112631
MAGI1	4809.8	0.53201	0.115676	4.59914	4.24e-06	0.000112661
SORT1	5146.87	0.215491	0.0468755	4.5971	4.28e-06	0.000113586
MBIP	3012.66	-0.627381	0.136539	-4.59488	4.33e-06	0.000114614
ACSS3	213.891	-1.08153	0.235429	-4.59387	4.35e-06	0.000114983
SLC15A3	23.6446	-2.08218	0.453364	-4.59274	4.37e-06	0.000115422
LAMC1	1671.19	-0.67302	0.146671	-4.58865	4.46e-06	0.000117512
CHST7	444.708	-0.973345	0.212172	-4.58753	4.49e-06	0.000117954
IFI44	69.4677	-0.868007	0.1894	-4.58292	4.59e-06	0.000120362
SLC16A14	4517.1	0.309174	0.0674701	4.58239	4.6e-06	0.000120362
GPER1	43.2699	-2.0045	0.437444	-4.58229	4.6e-06	0.000120362
SAMD4A	418.121	0.588475	0.128476	4.58041	4.64e-06	0.000121254
PARD6G	643.439	0.488078	0.106575	4.57965	4.66e-06	0.000121499
TAGLN	117.101	-0.92778	0.202864	-4.5734	4.8e-06	0.000124755
SESTD1	6652.28	0.482146	0.105431	4.57311	4.81e-06	0.000124755
KCNIP1	645.461	0.494029	0.108028	4.57315	4.8e-06	0.000124755
TFF3	38.4283	-4.22371	0.924337	-4.56945	4.89e-06	0.000126753
WT1.AS	25.373	-2.27297	0.497814	-4.5659	4.97e-06	0.000128712
SAMD10	1000.01	0.583836	0.127885	4.56532	4.99e-06	0.000128858
C12orf49	4429.51	0.254158	0.0556834	4.56434	5.01e-06	0.000129259
PTHLH	14.9196	-3.19084	0.699199	-4.56357	5.03e-06	0.00012953
ADAMTS17	72.0344	-1.10551	0.242386	-4.56095	5.09e-06	0.000130949
POU3F2	4494.41	1.33267	0.292222	4.56047	5.1e-06	0.000131042
GALC	2142.76	0.208935	0.0458416	4.55777	5.17e-06	0.000132527
UGGT2	436.616	-0.60983	0.133927	-4.55346	5.28e-06	0.000134844
RHOH	18.8323	-2.8029	0.615525	-4.55367	5.27e-06	0.000134844
HKDC1	41.3813	-1.0397	0.228361	-4.55289	5.29e-06	0.000134994
GNAI1	4508.75	0.443158	0.0973753	4.55103	5.34e-06	0.000135983
SPRY4	431.097	1.02213	0.224698	4.5489	5.39e-06	0.000137055
LPAR4	127.237	1.04206	0.229088	4.54872	5.4e-06	0.000137055
HTR5A	134.143	-1.00159	0.220446	-4.54348	5.53e-06	0.00014029
NEDD9	672.269	-0.430326	0.0947511	-4.54165	5.58e-06	0.00014129
MTUS2	397.571	0.928437	0.204449	4.54117	5.59e-06	0.000141356
C16orf72	2665.45	0.242502	0.0534045	4.54085	5.6e-06	0.000141356
LINC01102	189.265	1.51427	0.333497	4.54057	5.61e-06	0.000141356
ABO	13.5329	-2.05232	0.452133	-4.53921	5.65e-06	0.000142048
TTC29	27.5327	-1.76393	0.389011	-4.53439	5.78e-06	0.000145105
CXCL14	158.474	-1.42928	0.315271	-4.53351	5.8e-06	0.000145485
BTN3A3	90.2401	-1.006	0.222178	-4.5279	5.96e-06	0.000149171
CYFIP2	13045.4	0.279457	0.06177	4.52416	6.06e-06	0.0001516
JAG1	1492.82	-1.10659	0.244707	-4.5221	6.12e-06	0.00015285
FGD3	723.6	-0.755963	0.16725	-4.51995	6.19e-06	0.000154168
EIF1AX	7445.14	0.381323	0.0844374	4.51605	6.3e-06	0.000156797
ORMDL1	1398.14	-0.327191	0.0724653	-4.51514	6.33e-06	0.000157225
KIDINS220	32437	0.449273	0.0995933	4.51107	6.45e-06	0.000160027
ABCA5	795.945	-0.530107	0.117525	-4.51057	6.47e-06	0.00016016
LINC00883	457.895	0.443181	0.0983198	4.50755	6.56e-06	0.000162212
STK26	795.77	-0.990135	0.220172	-4.4971	6.89e-06	0.000170126
ZDHHC18	1138.27	0.353562	0.0786341	4.49629	6.92e-06	0.000170523
CHCHD2	3056.77	-3.06488	0.681757	-4.49556	6.94e-06	0.000170848
ARHGAP24	449.835	-0.987428	0.219704	-4.49435	6.98e-06	0.000171559
GNAQ	9036.71	0.38751	0.0862415	4.49331	7.01e-06	0.000172137
CCDC8	1180.69	-0.714213	0.158967	-4.49285	7.03e-06	0.000172255
HMX2	204.903	-2.5398	0.565633	-4.49018	7.12e-06	0.000174159
APP	59332.1	0.292124	0.0650815	4.48858	7.17e-06	0.000175159
TXNRD2	186.102	-3.28926	0.73285	-4.48832	7.18e-06	0.000175159
NUAK1	2785.29	0.465824	0.103814	4.48708	7.22e-06	0.000175918
TMEM231	1420.65	-0.55314	0.123375	-4.48339	7.35e-06	0.000178723
PDE3A	1011.53	-1.06993	0.238711	-4.48214	7.39e-06	0.000179374
PAK3	3776.14	0.543004	0.121153	4.48197	7.4e-06	0.000179374
SCAMP2	573.719	-0.60541	0.135127	-4.48031	7.45e-06	0.00018051
XPR1	31139.9	0.58399	0.130451	4.4767	7.58e-06	0.00018331
MAP7D3	378.954	-0.767684	0.171584	-4.47409	7.67e-06	0.00018529
HMX3	298.146	-2.33223	0.521329	-4.47362	7.69e-06	0.000185424
KLF7	4837.03	0.551756	0.123363	4.47263	7.73e-06	0.000186001
PCDHA7	99.9467	0.891654	0.199401	4.47165	7.76e-06	0.000186581
MED28	2659.45	0.235988	0.0527959	4.46981	7.83e-06	0.000187914
P3H1	772.333	-0.554929	0.124205	-4.46784	7.9e-06	0.000188372
TMEM132B	830.91	-0.849589	0.190139	-4.46824	7.89e-06	0.000188372
EMILIN1	235.568	-0.652142	0.145968	-4.46772	7.91e-06	0.000188372
GPR22	152.853	0.705811	0.15795	4.46858	7.87e-06	0.000188372
INVS	421.242	-0.404001	0.0904137	-4.46836	7.88e-06	0.000188372
INA	37063.1	0.495299	0.110897	4.46629	7.96e-06	0.000189351
CPZ	7.80074	-3.29608	0.738205	-4.465	8.01e-06	0.000190223
ZNF433	534.723	0.390314	0.0874282	4.4644	8.03e-06	0.00019036
FHDC1	837.026	0.733044	0.164204	4.46422	8.04e-06	0.00019036
SLITRK2	1177.8	-3.78433	0.847827	-4.46356	8.06e-06	0.000190662
FAM86FP	34.7308	1.09787	0.245994	4.46299	8.08e-06	0.000190892
CFAP45	91.7843	-2.06981	0.464516	-4.45585	8.36e-06	0.000197075
EML6	423.742	-0.512328	0.115003	-4.45491	8.39e-06	0.00019765
NPTX2	1985.8	-1.61401	0.362387	-4.45384	8.43e-06	0.000198355
APOO	950.07	0.439145	0.0986305	4.45243	8.49e-06	0.000199372
SEPSECS.AS1	12.6075	-1.82061	0.409295	-4.44815	8.66e-06	0.000203089
CECR7	7.96672	-4.7715	1.07303	-4.44674	8.72e-06	0.000204133
ADM	412.81	-2.11564	0.476142	-4.4433	8.86e-06	0.000206832
PNCK	551.041	-0.78288	0.176185	-4.44352	8.85e-06	0.000206832
GPCPD1	2217.57	0.470574	0.105975	4.44041	8.98e-06	0.000209326
CCDC136	1770.66	0.282345	0.0635922	4.43993	9e-06	0.000209488
C18orf8	636.714	0.297885	0.0671242	4.43782	9.09e-06	0.00021125
STC2	3443.11	-1.32813	0.299466	-4.43499	9.21e-06	0.000213737
AK7	115.986	-0.99979	0.225537	-4.43293	9.3e-06	0.000215479
ATP6V0A1	8990.86	0.266399	0.0601016	4.43247	9.32e-06	0.000215632
S100A11	34.6376	-3.01101	0.679496	-4.43124	9.37e-06	0.000216545
ERC2	2013.6	0.49403	0.111511	4.43034	9.41e-06	0.000216545
TRPC1	623.732	0.384204	0.086711	4.43086	9.39e-06	0.000216545
TTPA	25.5761	-1.26418	0.285331	-4.4306	9.4e-06	0.000216545
DSC3	94.3003	-1.88903	0.426427	-4.4299	9.43e-06	0.000216674
NCOR2	4532	-0.256007	0.05783	-4.42689	9.56e-06	0.00021913
MMP14	1056.97	-1.03499	0.233797	-4.42686	9.56e-06	0.00021913
CTNNA2	8191.99	0.461285	0.104259	4.42441	9.67e-06	0.000221323
CFC1B	9.37983	-2.56821	0.580942	-4.42077	9.83e-06	0.000224763
PTRF	74.0819	-2.25187	0.509519	-4.4196	9.89e-06	0.000225669
MYO5B	438.486	1.39923	0.316818	4.41651	1e-05	0.000228273
DRC1	180.768	-1.12286	0.254229	-4.41672	1e-05	0.000228273
DUSP6	2169.84	1.08035	0.244776	4.41362	1.02e-05	0.000230444
OTX2	2491.96	-0.479289	0.108589	-4.4138	1.02e-05	0.000230444
PLEKHH1	390.203	-0.474127	0.107425	-4.41355	1.02e-05	0.000230444
CD44	229.797	-1.0508	0.238158	-4.41222	1.02e-05	0.000231547
LINC01560	329.462	-0.549031	0.124653	-4.40446	1.06e-05	0.000239651
LINC01158	691.565	2.22807	0.506012	4.40319	1.07e-05	0.000240726
FAM65B	5992.9	0.617486	0.14027	4.40212	1.07e-05	0.00024158
NEFL	12645.9	1.44387	0.328205	4.39928	1.09e-05	0.000244422
RCAN2	1370.65	1.12126	0.25542	4.38986	1.13e-05	0.000254907
SOX2	13722.5	-0.527641	0.120254	-4.38773	1.15e-05	0.000257054
BTG1	5138.63	-0.467498	0.10657	-4.38677	1.15e-05	0.00025784
HSD17B7	393.716	-0.519315	0.118446	-4.38442	1.16e-05	0.000260281
HEY1	1201.84	-0.764089	0.17438	-4.38174	1.18e-05	0.00026314
G0S2	134.741	-1.01379	0.231456	-4.38005	1.19e-05	0.000264819
SHROOM2	3942.45	0.831153	0.189788	4.37938	1.19e-05	0.000265269
TPM1	1450.88	0.312545	0.0713782	4.37871	1.19e-05	0.000265722
REEP3	810.426	-0.610713	0.139495	-4.37802	1.2e-05	0.000266195
LRRC2	12.3265	-2.52306	0.576384	-4.3774	1.2e-05	0.000266592
ARAP1	1124.37	-0.599413	0.136999	-4.37531	1.21e-05	0.000268792
PIEZO1	161.034	-0.758028	0.173385	-4.37193	1.23e-05	0.000272612
CNTNAP3B	98.0344	1.09301	0.250118	4.37	1.24e-05	0.000274667
SNX16	321.905	0.57281	0.131136	4.36806	1.25e-05	0.000276733
GRIN2A	725.598	-1.22827	0.281375	-4.36524	1.27e-05	0.000279435
GGN	134.856	0.869297	0.19913	4.36547	1.27e-05	0.000279435
SP5	39.2179	-1.77907	0.407572	-4.36505	1.27e-05	0.000279435
PRR36	5350.98	0.504685	0.115657	4.36365	1.28e-05	0.000280848
CCSER1	621.294	0.55256	0.126736	4.35993	1.3e-05	0.000285278
RPP25	949.029	0.534493	0.122742	4.3546	1.33e-05	0.000291912
SH3RF3	1098.61	0.576218	0.132402	4.35203	1.35e-05	0.000294958
AMT	384.695	0.757979	0.17424	4.35021	1.36e-05	0.00029702
PTPRD.AS1	69.138	0.818201	0.188142	4.34886	1.37e-05	0.00029845
GPR153	2563.67	0.769576	0.177074	4.34608	1.39e-05	0.000301714
EPHB3	3147.11	-0.773716	0.178034	-4.34589	1.39e-05	0.000301714
MAN1A1	465.948	1.08156	0.248924	4.34493	1.39e-05	0.000302624
LOC642361	248.035	2.62407	0.604122	4.3436	1.4e-05	0.00030324
NKILA	59.1501	0.863938	0.198891	4.34377	1.4e-05	0.00030324
SUN1	2503.16	-0.340088	0.0782947	-4.34369	1.4e-05	0.00030324
MFF	2811.52	0.19257	0.0443483	4.34221	1.41e-05	0.000304762
FZD10	27.4706	-2.56382	0.590489	-4.34186	1.41e-05	0.00030484
AP2B1	33692.6	0.233162	0.0538066	4.33333	1.47e-05	0.000316485
IRGQ	5285.41	0.393069	0.0907253	4.33252	1.47e-05	0.000316599
TTC31	329.725	-0.530672	0.122474	-4.33292	1.47e-05	0.000316599
EYS	66.3597	-0.887227	0.20479	-4.33238	1.48e-05	0.000316599
HIC2	1519.15	0.526176	0.121532	4.32951	1.49e-05	0.000320315
COL9A1	375.946	-1.07684	0.248739	-4.32922	1.5e-05	0.000320327
DPY19L4	1192.72	-0.476584	0.110104	-4.32848	1.5e-05	0.000320979
CERCAM	641.28	-0.696788	0.161038	-4.32685	1.51e-05	0.000322927
TRAF5	65.3927	0.830601	0.19204	4.32514	1.52e-05	0.000325024
ENOX1	916.823	0.585366	0.135375	4.32404	1.53e-05	0.000326224
MAP4K4	18949.2	0.346162	0.0801854	4.31702	1.58e-05	0.000335887
CCZ1	873.39	0.492254	0.114024	4.31712	1.58e-05	0.000335887
HERC6	57.5612	-1.1398	0.264043	-4.31671	1.58e-05	0.000335908
FOXB1	28.6297	-3.20129	0.741748	-4.31587	1.59e-05	0.000336747
TYW3	120.229	-3.18999	0.739504	-4.31369	1.61e-05	0.000339644
ADGRG6	42.7151	-2.3	0.533434	-4.31168	1.62e-05	0.000342311
ITGB5	791.037	-0.922368	0.214103	-4.30807	1.65e-05	0.000347491
NEO1	9475.88	0.281342	0.0653591	4.30455	1.67e-05	0.000352598
TMEM133	64.7411	-1.17027	0.272116	-4.30063	1.7e-05	0.000358438
LINC01563	48.3987	-1.13457	0.263976	-4.29799	1.72e-05	0.000361618
SLFN12	51.9034	-1.60602	0.373683	-4.29781	1.72e-05	0.000361618
EPHA7	842.237	1.16365	0.270739	4.29804	1.72e-05	0.000361618
PHYHIPL	4248.62	0.353666	0.0823134	4.29658	1.73e-05	0.000363162
LRTM2	179.374	-1.6355	0.380718	-4.29583	1.74e-05	0.000363923
PCDHGA3	529.209	-4.16946	0.972956	-4.28536	1.82e-05	0.000380508
MAGED1	38247.1	-0.220251	0.051396	-4.28537	1.82e-05	0.000380508
UNC13A	6154.21	0.553155	0.129099	4.28473	1.83e-05	0.000381092
ANXA7	1416.83	-0.469353	0.109558	-4.28405	1.84e-05	0.000381766
DPH5	1133.83	-0.394332	0.0921462	-4.27942	1.87e-05	0.000389302
CRTAP	1916.27	-0.615346	0.143818	-4.27866	1.88e-05	0.000390138
GPR179	830.703	-1.67666	0.391942	-4.27784	1.89e-05	0.000391071
TMEM44	614.052	0.543877	0.127191	4.27608	1.9e-05	0.000393674
JPH1	135.758	1.41623	0.331262	4.27525	1.91e-05	0.000394631
CAB39L	1435.39	0.444677	0.104096	4.2718	1.94e-05	0.000400283
NUTM2B	128.564	1.84476	0.43195	4.27077	1.95e-05	0.000401635
SV2C	585.213	-0.493207	0.115595	-4.26667	1.98e-05	0.000408557
GDPD5	1246.15	0.849395	0.19923	4.26339	2.01e-05	0.000414083
UBLCP1	1830.7	0.420246	0.0985895	4.26258	2.02e-05	0.000415055
KLC1	26882.2	0.382665	0.0898418	4.25932	2.05e-05	0.000420619
BTN2A2	369.684	-0.580291	0.136249	-4.25904	2.05e-05	0.000420619
PGF	135.889	-1.79154	0.420714	-4.25833	2.06e-05	0.000421428
SUMF1	180.012	-0.922655	0.216727	-4.25723	2.07e-05	0.000422976
FRG1CP	190.115	0.527732	0.124021	4.25519	2.09e-05	0.000426305
IGSF11	200.021	1.06708	0.250892	4.25316	2.11e-05	0.000429657
EIF4G2	89314.8	0.298227	0.0701456	4.25155	2.12e-05	0.000432219
EDARADD	112.622	-0.884137	0.208015	-4.25035	2.13e-05	0.000433444
FLJ44635	42.7871	-1.02545	0.241263	-4.25036	2.13e-05	0.000433444
RUSC1	3253.27	0.513784	0.120928	4.24868	2.15e-05	0.00043615
KCNG1	548.771	-0.82464	0.194121	-4.24807	2.16e-05	0.00043679
PRRG1	540.443	0.489394	0.115213	4.24775	2.16e-05	0.000436869
CDYL2	224.587	0.598625	0.140987	4.24596	2.18e-05	0.000439815
RFXAP	517.318	-0.340936	0.0803606	-4.24257	2.21e-05	0.000445956
CDH4	4363.55	0.534875	0.126155	4.23983	2.24e-05	0.000450339
PCDHB2	4263.55	0.377612	0.089069	4.23954	2.24e-05	0.000450339
HECA	1435.32	0.438719	0.103482	4.23957	2.24e-05	0.000450339
NEBL	2149.22	-0.703415	0.166161	-4.23334	2.3e-05	0.000462373
ERICH3	136.773	-0.918548	0.217013	-4.2327	2.31e-05	0.000463125
IGFBP2	24905.7	-0.567529	0.1341	-4.23212	2.31e-05	0.000463742
ITGB1	5411.94	-0.574832	0.135884	-4.23031	2.33e-05	0.000466909
SUSD4	1027.96	0.461909	0.109302	4.22598	2.38e-05	0.000475402
KC6	181.922	-0.488215	0.115557	-4.22487	2.39e-05	0.000477154
RNF175	681.65	0.553201	0.131164	4.21764	2.47e-05	0.000492104
PC	1212.48	-0.53643	0.127217	-4.21666	2.48e-05	0.000493641
A2M.AS1	120.903	0.914422	0.216876	4.21634	2.48e-05	0.000493731
TXNIP	19116.2	-0.377033	0.0894422	-4.21538	2.49e-05	0.000495244
FAM81B	13.1483	-2.59172	0.614978	-4.21433	2.51e-05	0.000496942
SLC39A12	9.39525	1.89569	0.450107	4.21166	2.54e-05	0.000502246
POGK	4987.67	0.249646	0.0592901	4.21059	2.55e-05	0.00050401
DNAH10	749.558	0.540093	0.12829	4.20993	2.55e-05	0.000504704
REC8	1463.41	-0.505072	0.119985	-4.20945	2.56e-05	0.000504704
NOVA1	6945.75	0.47955	0.113915	4.20971	2.56e-05	0.000504704
LSM11	2620.08	0.502771	0.119456	4.20885	2.57e-05	0.000505444
STAC	193.974	0.8952	0.212729	4.20818	2.57e-05	0.000506322
SHC3	5578.99	0.596577	0.141788	4.20753	2.58e-05	0.000507159
FOXP4	1717.69	0.854163	0.203115	4.20532	2.61e-05	0.000511367
PHKA2	709.119	-0.447925	0.106519	-4.20512	2.61e-05	0.000511367
MASP1	2018.29	0.989805	0.235407	4.20465	2.61e-05	0.000511816
CRISPLD2	32.741	-1.42878	0.339861	-4.20403	2.62e-05	0.000512595
PIK3CD	373.55	0.483949	0.115211	4.20055	2.66e-05	0.000519731
NOL4L	6600.65	0.333444	0.0793848	4.20036	2.66e-05	0.000519731
KBTBD2	2085.75	0.307918	0.0733718	4.19668	2.71e-05	0.000527612
LOC100288637	88.9457	-1.15872	0.276191	-4.19534	2.72e-05	0.000530103
PTGES	173.465	-0.712763	0.170022	-4.19219	2.76e-05	0.000536857
RBM11	99.495	0.8065	0.192584	4.18779	2.82e-05	0.000546731
KCNE4	11.7719	-2.36334	0.565	-4.1829	2.88e-05	0.000557957
PDE8B	244.738	-0.548123	0.131081	-4.18155	2.9e-05	0.000560619
HEBP1	537.815	-0.366443	0.0876432	-4.18108	2.9e-05	0.000561109
PNP	476.8	-0.403467	0.0965528	-4.17872	2.93e-05	0.000565601
COL5A1	677.043	-1.24212	0.297231	-4.17897	2.93e-05	0.000565601
DNASE1	572.276	0.373129	0.0893689	4.17516	2.98e-05	0.000573846
IQCK	1074.31	0.426692	0.102214	4.17451	2.99e-05	0.000574798
CTTNBP2	736.932	0.397552	0.0952544	4.17358	3e-05	0.000576457
UBE3B	1214.67	0.269442	0.0645932	4.17137	3.03e-05	0.000581385
GANC	412.655	-0.446963	0.107164	-4.17084	3.03e-05	0.00058207
ZNF763	156.758	0.556323	0.133393	4.17057	3.04e-05	0.000582071
BHLHE40	985.261	-1.03144	0.24747	-4.16795	3.07e-05	0.000588105
SNN	10706.5	0.37992	0.0912121	4.16524	3.11e-05	0.000594136
HTATSF1P2	60.0482	0.771199	0.185158	4.16508	3.11e-05	0.000594136
UGT8	131.488	1.21275	0.291332	4.16278	3.14e-05	0.000599471
SPATS2L	2440.13	-0.320267	0.0770311	-4.15763	3.22e-05	0.000612418
PLAGL1	376.432	-0.876747	0.210985	-4.1555	3.25e-05	0.000617414
KDELR3	94.5039	-1.50702	0.362989	-4.15169	3.3e-05	0.00062706
ANKRD65	14.7858	-1.65223	0.398049	-4.15081	3.31e-05	0.000628071
DSEL	767.027	1.37307	0.330797	4.15078	3.31e-05	0.000628071
HSDL1	10502.3	0.310787	0.0748922	4.14979	3.33e-05	0.000630058
NSMCE1	918.188	-0.445801	0.107438	-4.14938	3.33e-05	0.00063045
ANKMY2	3083.89	0.305545	0.0736878	4.14648	3.38e-05	0.000637757
ARRDC4	3850.37	-0.531544	0.128252	-4.14453	3.41e-05	0.000642465
TBC1D8B	28.9762	-1.15556	0.278988	-4.14197	3.44e-05	0.000648925
FAM198B	562.274	-2.4515	0.591983	-4.14117	3.46e-05	0.000650425
RALYL	1784.54	0.66123	0.159831	4.13705	3.52e-05	0.000661447
ZIC3	5307.69	0.621751	0.150301	4.1367	3.52e-05	0.000661681
TMEM18	958.554	-0.266296	0.0644148	-4.13409	3.56e-05	0.000668494
UNC119B	3430.01	-0.410817	0.0994249	-4.13193	3.6e-05	0.000674009
ANKRD18B	50.0657	1.35553	0.328115	4.13127	3.61e-05	0.000675172
IMPACT	1971.23	-0.340581	0.0824646	-4.13003	3.63e-05	0.000678052
NFATC4	574.509	-0.755434	0.182925	-4.12974	3.63e-05	0.000678111
ALDOC	1623.12	-0.532497	0.129009	-4.1276	3.67e-05	0.000680846
SPIRE1	3028.73	0.226762	0.0549393	4.1275	3.67e-05	0.000680846
THNSL2	217.128	-1.59821	0.387172	-4.12791	3.66e-05	0.000680846
ITPR1	66.376	-0.823234	0.199446	-4.1276	3.67e-05	0.000680846
HMGCLL1	1243.27	0.335883	0.0813623	4.12823	3.66e-05	0.000680846
SEPP1	90.8576	-0.863324	0.209188	-4.12703	3.67e-05	0.000681448
PDZD7	274.192	0.588011	0.142556	4.12478	3.71e-05	0.00068736
GPX8	438.999	-0.922337	0.224007	-4.11744	3.83e-05	0.000707181
CD24	36735.7	0.418601	0.101662	4.11757	3.83e-05	0.000707181
TAC1	690.016	1.37964	0.335036	4.11789	3.82e-05	0.000707181
PAPOLG	1236.27	0.367119	0.0891841	4.11642	3.85e-05	0.000708536
FAM193A	2755.56	0.254138	0.0617406	4.11622	3.85e-05	0.000708536
GPAT4	4518.12	0.238021	0.0578232	4.11636	3.85e-05	0.000708536
NAV3	2735.33	0.659965	0.160345	4.1159	3.86e-05	0.000708709
SMIM18	501.102	0.588935	0.143222	4.11204	3.92e-05	0.000719838
DAB1	510.99	0.491144	0.119517	4.1094	3.97e-05	0.000727316
OLFML2B	130.979	-2.35555	0.573668	-4.10612	4.02e-05	0.000736873
STX1B	4468.36	0.398988	0.0972	4.10481	4.05e-05	0.000739386
FBN2	314.357	-0.742736	0.180938	-4.10492	4.04e-05	0.000739386
ERBB2	2450.34	-0.45246	0.110309	-4.10174	4.1e-05	0.000747885
EPHB6	1021.06	0.616535	0.150314	4.10165	4.1e-05	0.000747885
PCDHGB2	77.9434	-0.706171	0.172209	-4.10065	4.12e-05	0.000750266
MYD88	425.011	-0.773653	0.18888	-4.096	4.2e-05	0.00076463
GFOD2	3933.13	0.355494	0.0868057	4.09528	4.22e-05	0.00076615
PCDHGA8	76.3999	-1.06864	0.261093	-4.09294	4.26e-05	0.000773087
B3GAT1	5899.9	0.420086	0.102684	4.09103	4.29e-05	0.000778586
PLEKHD1	33.8	1.59928	0.39122	4.08794	4.35e-05	0.00078728
JAKMIP2	3576.66	0.38092	0.0931802	4.08799	4.35e-05	0.00078728
RPA2	2192.48	-0.4239	0.10374	-4.08618	4.39e-05	0.000792391
TTC7A	397.602	-0.454719	0.111344	-4.08392	4.43e-05	0.000798468
TP53INP2	2251.4	0.366367	0.0897104	4.08389	4.43e-05	0.000798468
NDUFAF4	1054.27	0.429708	0.105253	4.08262	4.45e-05	0.00080194
CLEC4GP1	15.1794	-2.01404	0.493354	-4.08234	4.46e-05	0.000802038
B3GAT2	115.023	-1.1267	0.276152	-4.08002	4.5e-05	0.000809171
FH	2357.36	0.179138	0.0439251	4.07826	4.54e-05	0.000813768
KIF5C	44077.8	0.427491	0.104824	4.07819	4.54e-05	0.000813768
X09.Sep	9516.28	-0.293629	0.0720854	-4.07335	4.63e-05	0.000829962
MEX3A	10311.1	0.290006	0.0712926	4.06782	4.75e-05	0.000848956
CNTFR	4314.22	0.435048	0.107039	4.06437	4.82e-05	0.000860658
MVB12B	7984.73	0.410963	0.101185	4.06149	4.88e-05	0.000870402
HPSE2	10.9281	-3.35476	0.826117	-4.06088	4.89e-05	0.000871727
ARHGEF7	7803.47	0.288446	0.0710451	4.06004	4.91e-05	0.000873877
NEDD4L	13876.7	0.563875	0.138973	4.05745	4.96e-05	0.000882664
ATP10B	70.9598	1.05334	0.25967	4.05648	4.98e-05	0.000885366
NMBR	14.3135	2.03844	0.503133	4.0515	5.09e-05	0.000903439
NME4	1360.73	-0.533	0.131608	-4.04989	5.12e-05	0.00090793
TMCC1	3096.97	0.240924	0.0594899	4.04983	5.13e-05	0.00090793
SORCS1	1558.92	0.944925	0.233443	4.04777	5.17e-05	0.000914948
WNT8B	73.207	-3.22493	0.797292	-4.04486	5.24e-05	0.000925403
ZDHHC13	1106.1	-0.300145	0.0742156	-4.04424	5.25e-05	0.000926509
LRP5	1821.86	-0.399579	0.0988062	-4.04407	5.25e-05	0.000926509
NXPH1	1163.98	0.91683	0.226744	4.04345	5.27e-05	0.000927938
IGSF5	216.252	-0.695352	0.172002	-4.0427	5.28e-05	0.000929883
ZNF880	409.509	-0.796516	0.197159	-4.03997	5.35e-05	0.000939754
PEAR1	22.0354	-1.3133	0.325156	-4.03898	5.37e-05	0.000940775
CPB2.AS1	144.307	0.785973	0.194579	4.03936	5.36e-05	0.000940775
LOC100144595	35.9801	0.927376	0.229608	4.03896	5.37e-05	0.000940775
FAM131B	5874.47	0.377568	0.0935473	4.03612	5.43e-05	0.000951186
ZNF473	1028.53	-0.27173	0.0673297	-4.03582	5.44e-05	0.000951385
VSNL1	718.406	1.69324	0.419675	4.03464	5.47e-05	0.000955155
NPY5R	33.9694	1.35227	0.335621	4.02915	5.6e-05	0.000976664
GALNT15	241.332	-0.841804	0.209	-4.02776	5.63e-05	0.000981403
MAB21L1	15.6038	2.01798	0.501081	4.02725	5.64e-05	0.000982505
PIGZ	160.441	0.816224	0.202727	4.02623	5.67e-05	0.000985722
LINC01159	161.236	2.45288	0.609277	4.02588	5.68e-05	0.000986108
HMCN1	31.2683	-1.63035	0.405151	-4.02405	5.72e-05	0.000992738
ZSCAN5A	121.077	-0.622247	0.154668	-4.02312	5.74e-05	0.000995602
WASF1	5073.57	0.344684	0.085702	4.02189	5.77e-05	0.000999755
SEZ6L	12266.7	0.395627	0.0984709	4.01771	5.88e-05	0.00101657
CEBPZOS	1069.09	-0.626138	0.155934	-4.01539	5.93e-05	0.00102553
FAR2	228.383	1.05778	0.263449	4.01511	5.94e-05	0.00102565
UBXN2B	3327.57	0.298969	0.0744843	4.01385	5.97e-05	0.00103003
HLF	84.3774	-0.766924	0.191204	-4.01103	6.05e-05	0.00104131
YBX3	1064.44	-0.912163	0.227473	-4.00999	6.07e-05	0.00104482
KRTAP5.AS1	224.885	0.705602	0.175989	4.00936	6.09e-05	0.00104651
CD27.AS1	260.939	-0.884804	0.220798	-4.0073	6.14e-05	0.00105454
TSC22D3	2698.22	-0.65265	0.162891	-4.00666	6.16e-05	0.00105627
FGF10.AS1	8.46017	-2.97133	0.741848	-4.00531	6.19e-05	0.00106123
LOC389906	959.191	0.31391	0.0784509	4.00136	6.3e-05	0.00107795
BMPER	28.5094	1.40361	0.350902	4	6.33e-05	0.00108305
P3H3	268.987	-0.634082	0.158623	-3.99741	6.4e-05	0.00109355
PLOD3	883.363	-0.513934	0.128573	-3.99721	6.41e-05	0.00109355
TMTC4	2919.67	0.420713	0.105288	3.99582	6.45e-05	0.00109768
ST18	1419.42	-0.569949	0.142635	-3.99585	6.45e-05	0.00109768
HSPB8	51.4763	-1.80073	0.450757	-3.9949	6.47e-05	0.00110082
ASPHD2	903.208	0.596229	0.149282	3.99397	6.5e-05	0.00110358
SNX10	1756.41	0.381697	0.0955721	3.99381	6.5e-05	0.00110358
MAPKAPK2	2210.75	-0.318974	0.0798724	-3.99354	6.51e-05	0.00110367
CARHSP1	3207.05	0.45297	0.113619	3.98674	6.7e-05	0.0011346
ITGB4	17.5894	-1.69355	0.424828	-3.98645	6.71e-05	0.00113473
SCD5	12220.4	0.371733	0.0932547	3.98621	6.71e-05	0.00113473
COMT	433.998	-2.54394	0.638432	-3.98466	6.76e-05	0.00114098
IL34	52.5216	-1.13063	0.284113	-3.97951	6.91e-05	0.00116477
TMEM167A	9563.69	0.366041	0.0920084	3.97834	6.94e-05	0.00116931
PRR16	75.3088	-0.744465	0.187409	-3.97241	7.11e-05	0.00119756
UBE2E3	5616.71	0.307864	0.0775154	3.97164	7.14e-05	0.0012002
LOC101927314	87.0834	1.95681	0.492862	3.9703	7.18e-05	0.00120572
ANKDD1A	191.355	0.61176	0.154166	3.9682	7.24e-05	0.00121513
PI15	430.206	-3.20534	0.807927	-3.96736	7.27e-05	0.00121819
H6PD	1158.2	-0.465395	0.117337	-3.96631	7.3e-05	0.00122229
UBQLN4	4253.76	0.297977	0.0751497	3.96512	7.34e-05	0.00122704
FLNA	6734.36	-0.761556	0.192075	-3.96489	7.34e-05	0.00122704
IL4R	28.9831	-1.13405	0.286092	-3.96394	7.37e-05	0.00122941
SERINC1	31481.8	0.260688	0.0657615	3.96413	7.37e-05	0.00122941
SKOR2	99.7382	-2.52485	0.637089	-3.96311	7.4e-05	0.00123244
MYO15B	55.5081	-0.906343	0.22886	-3.96024	7.49e-05	0.00124605
FAM122C	176.41	-0.475601	0.120114	-3.95957	7.51e-05	0.0012483
HELZ2	522.868	-0.681142	0.17216	-3.95644	7.61e-05	0.00126344
NTM	3273.42	0.501478	0.126779	3.95552	7.64e-05	0.00126705
ACSL6	1044.47	0.416067	0.10521	3.95465	7.66e-05	0.00127035
STAMBPL1	196.465	0.445197	0.11264	3.95238	7.74e-05	0.00128115
AEBP1	994.144	-0.834567	0.211233	-3.95093	7.78e-05	0.00128764
SEC11A	2593.02	-0.299661	0.0758575	-3.95032	7.8e-05	0.00128959
KCNC1	1505.76	0.365341	0.0925098	3.94922	7.84e-05	0.00129419
B2M	880.513	-0.602417	0.15255	-3.94898	7.85e-05	0.00129419
ANKH	1074.5	0.389239	0.0986276	3.94655	7.93e-05	0.00130605
MARK4	4787.32	0.28557	0.0723742	3.94574	7.96e-05	0.00130917
SNX24	414.697	0.377161	0.095595	3.9454	7.97e-05	0.0013097
NIPSNAP1	10138.5	0.218549	0.0553995	3.94496	7.98e-05	0.00131079
CDK5R1	14717.3	0.372057	0.0943585	3.94302	8.05e-05	0.00131876
RIPK4	16.2103	-2.03447	0.515965	-3.94303	8.05e-05	0.00131876
SHC1	682.357	-0.704529	0.178698	-3.94257	8.06e-05	0.00131989
SORCS3	1310.63	-0.560968	0.142387	-3.93975	8.16e-05	0.0013342
MKX	10.2992	-2.36249	0.599945	-3.93784	8.22e-05	0.0013381
RAB6A	12020.4	0.224983	0.0571242	3.93848	8.2e-05	0.0013381
HS3ST2	231.143	2.35624	0.598326	3.93806	8.21e-05	0.0013381
KCTD7	2992.05	0.293815	0.0746035	3.93836	8.2e-05	0.0013381
KDM5C	8725.99	0.280259	0.0711686	3.93796	8.22e-05	0.0013381
DOK5	349.296	0.774665	0.196848	3.93536	8.31e-05	0.00135065
ANK1	509.268	0.540269	0.137362	3.93316	8.38e-05	0.00136166
ATP2C1	4867.03	0.205013	0.0521471	3.93144	8.44e-05	0.0013701
LMAN1	3345.19	-0.350532	0.0891721	-3.93096	8.46e-05	0.00137073
FAM3C	4050.54	0.272643	0.0693599	3.93085	8.46e-05	0.00137073
CALCRL	67.8247	-1.01488	0.258205	-3.93053	8.48e-05	0.00137119
CD93	17.2938	-3.12892	0.796232	-3.92966	8.51e-05	0.00137477
TMEM57	3839.08	0.282045	0.071785	3.92902	8.53e-05	0.00137706
CNNM1	475.178	-0.429144	0.109247	-3.92818	8.56e-05	0.00137743
NPC2	531.875	-0.865803	0.220418	-3.928	8.57e-05	0.00137743
PIP4K2B	18192.4	0.28923	0.0736313	3.92808	8.56e-05	0.00137743
IMMP2L	193.388	-0.486373	0.123813	-3.92828	8.56e-05	0.00137743
DNMBP	491.037	-0.411132	0.104703	-3.92666	8.61e-05	0.00138376
VAMP5	44.9826	-3.19984	0.815968	-3.92153	8.8e-05	0.00141218
TCTN3	1264.39	-0.339106	0.0865134	-3.91969	8.87e-05	0.00142036
RALB	1901.89	0.233948	0.0596857	3.91966	8.87e-05	0.00142036
IFNLR1	49.6914	-0.840578	0.214589	-3.91716	8.96e-05	0.00143373
SH2D5	459.873	-0.79164	0.202205	-3.91503	9.04e-05	0.00144503
EFNA2	1218.31	0.498514	0.12738	3.9136	9.09e-05	0.00145222
ANXA2P2	14.0301	-2.23813	0.572082	-3.91225	9.14e-05	0.00145888
TVP23A	476.261	0.452494	0.115689	3.91131	9.18e-05	0.00146317
CMBL	1481.21	-0.426633	0.109098	-3.91055	9.21e-05	0.00146636
DLX1	7280.88	0.556529	0.142328	3.91019	9.22e-05	0.0014671
ACP6	132.828	-0.604482	0.154642	-3.9089	9.27e-05	0.00147068
ATP1B1	4716.09	0.427336	0.109324	3.90889	9.27e-05	0.00147068
STARD8	25.8996	1.0104	0.258475	3.90908	9.26e-05	0.00147068
CDK11A	739.433	0.318566	0.0815301	3.90734	9.33e-05	0.0014742
TMEM169	2515.64	0.322026	0.0824199	3.90713	9.34e-05	0.0014742
ARFGEF1	2592.73	0.400783	0.102561	3.90775	9.32e-05	0.0014742
SYK	36.3735	-1.64984	0.422245	-3.9073	9.33e-05	0.0014742
AFF2	7136.05	-0.542778	0.138912	-3.90735	9.33e-05	0.0014742
IFITM2	19.737	-3.22993	0.826756	-3.90675	9.35e-05	0.00147509
ZNF536	2480.71	-1.23097	0.315213	-3.90522	9.41e-05	0.00148305
PMEL	54.3092	-1.7053	0.436729	-3.90471	9.43e-05	0.00148472
C19orf48	962.143	-0.448434	0.115037	-3.89818	9.69e-05	0.00152381
PRKG1	296.241	-0.68935	0.176914	-3.89653	9.76e-05	0.00153279
ATAT1	10679.8	0.404275	0.10377	3.89587	9.78e-05	0.00153547
STK17A	473.489	0.898788	0.230761	3.89488	9.82e-05	0.00154025
TNS3	658.127	0.690406	0.177289	3.89425	9.85e-05	0.00154279
SNHG7	1182.61	-0.653791	0.167905	-3.8938	9.87e-05	0.00154412
ETV4	134.893	1.4438	0.370879	3.89292	9.9e-05	0.00154827
CEP19	921.784	0.253389	0.0651209	3.89105	9.98e-05	0.00155876
NTNG1	228.974	0.825624	0.212275	3.8894	0.000100494	0.00156639
TMEM200A	2591.62	0.373247	0.0959627	3.8895	0.000100449	0.00156639
ADAP2	23.9216	1.1387	0.292825	3.88866	0.000100799	0.00156917
PLEKHA8	2529.7	0.549654	0.141354	3.8885	0.000100866	0.00156917
EARS2	1386.26	-0.204036	0.0524748	-3.88827	0.000100963	0.00156919
ERAP1	608.435	0.555123	0.142803	3.88735	0.000101346	0.00157361
GPR143	66.5762	1.15138	0.296204	3.88712	0.000101442	0.00157361
TPM2	43.0752	-1.76844	0.455023	-3.88649	0.000101703	0.00157616
CYSLTR2	24.4249	-1.73241	0.445841	-3.8857	0.000102034	0.00157978
SEMA3C	3664.77	0.789438	0.203242	3.88423	0.000102655	0.00158787
AAMDC	153.35	-0.692654	0.178396	-3.88267	0.000103314	0.00159654
PPP1R13L	77.0523	-0.641637	0.165282	-3.88208	0.000103567	0.00159893
TMBIM1	26.4246	-1.97865	0.509742	-3.88166	0.000103744	0.00160015
BTBD10	2908.69	0.287112	0.0739721	3.88135	0.000103877	0.00160067
GPD1	121.14	-1.2197	0.314292	-3.8808	0.000104114	0.00160152
TES	151.996	1.13838	0.29334	3.88076	0.000104129	0.00160152
CSRNP2	5497.94	0.320759	0.0826918	3.87897	0.000104899	0.00161182
CSRNP3	11766.9	0.526282	0.135715	3.87783	0.000105391	0.00161785
GAS5	3156.63	-0.611447	0.157763	-3.87574	0.0001063	0.00162849
ISG20	29.7301	-1.37406	0.354545	-3.87555	0.000106385	0.00162849
CFC1	29.7296	-1.66845	0.430488	-3.87572	0.000106309	0.00162849
AGTRAP	200.728	-0.928672	0.239661	-3.87494	0.000106651	0.00162949
MAPK11	553.726	0.558135	0.144034	3.87502	0.000106616	0.00162949
SERTAD4.AS1	34.6619	1.05405	0.272141	3.87316	0.000107435	0.0016391
SERPINH1	2570.62	-0.938447	0.242302	-3.87305	0.000107482	0.0016391
FAM66A	184.776	0.597784	0.154357	3.87274	0.000107619	0.00163966
NRIP1	4555.53	0.493117	0.127342	3.87238	0.000107778	0.00164054
PKN1	8936.02	0.291933	0.075394	3.8721	0.0001079	0.00164085
LOC390705	16.8747	-3.91712	1.01217	-3.87002	0.000108827	0.0016534
P4HA1	3982.89	-0.877037	0.226654	-3.8695	0.00010906	0.00165538
MCEE	199.765	-0.455645	0.117813	-3.86751	0.000109952	0.00166737
TAL2	38.7832	-1.17967	0.305075	-3.86681	0.000110268	0.0016706
SNX7	551.784	-0.525373	0.135946	-3.86458	0.000111279	0.00168434
LAMA2	65.718	-1.07335	0.277832	-3.8633	0.000111864	0.00169162
SERPINF2	20.6611	-3.63372	0.940882	-3.86204	0.000112446	0.00169725
ZNF728	55.238	-4.59969	1.19094	-3.86225	0.000112349	0.00169725
CTSH	88.5163	-0.645341	0.167127	-3.86138	0.000112747	0.00169864
FOXO4	211.619	-0.480877	0.124528	-3.86161	0.000112644	0.00169864
FAM57A	866.517	-0.308414	0.0798899	-3.86049	0.000113162	0.00170331
ADD1	13160	0.169701	0.043974	3.85912	0.000113797	0.00171128
FAM129A	203.57	-0.979239	0.253814	-3.85809	0.000114276	0.0017153
FUT10	209.038	-0.571521	0.148128	-3.8583	0.000114179	0.0017153
MKRN1	9207.34	0.218941	0.0567563	3.85756	0.000114523	0.00171741
LOC100506985	453.039	0.513161	0.133052	3.85684	0.000114863	0.00172093
MIOS	1242.31	0.295489	0.0766206	3.85652	0.000115012	0.00172158
C11orf95	8386.41	0.34866	0.0904266	3.85572	0.000115389	0.00172563
CXCL16	72.6812	-0.843198	0.218732	-3.85493	0.000115762	0.00172802
SOWAHB	20.2724	-1.43835	0.373097	-3.85515	0.000115658	0.00172802
PI4KAP1	154.415	0.779909	0.202344	3.85437	0.000116027	0.00173037
CTTN	3400.93	0.282298	0.0732776	3.85244	0.000116946	0.00174248
MNS1	176.065	-0.757045	0.196606	-3.85057	0.000117841	0.00175421
STX12	5970.23	0.24289	0.0631	3.84929	0.000118463	0.00175976
MITF	66.7821	-1.10418	0.286853	-3.8493	0.000118458	0.00175976
POGLUT1	711.856	-0.332997	0.0865123	-3.84913	0.000118539	0.00175976
PTGES3L	42.3424	0.823224	0.214032	3.84627	0.00011993	0.00177878
DHRSX	595.827	0.398118	0.103573	3.84385	0.000121119	0.00179478
TTR	22.2251	-3.18368	0.828621	-3.84214	0.000121966	0.00180568
CHRFAM7A	59.8048	1.03366	0.269059	3.84174	0.000122164	0.00180696
DYNC1I2	12783	0.296147	0.0770959	3.84128	0.000122392	0.00180869
LOC100506860	8.10303	-2.53826	0.661176	-3.83901	0.000123533	0.00182388
POLR2J2	11.8573	2.02012	0.526275	3.83853	0.000123774	0.00182578
ITGA2	471.639	-1.0261	0.267337	-3.83825	0.000123916	0.00182622
LAYN	20.8942	-1.44315	0.37619	-3.83621	0.000124946	0.00183973
SLC47A1	10.0984	-2.21567	0.577909	-3.83394	0.000126107	0.00185514
OXCT1	3292.63	0.370815	0.0967725	3.83182	0.000127199	0.00186781
KBTBD11	7984.8	0.411321	0.107342	3.83186	0.000127176	0.00186781
PIK3C2B	2426.22	0.267156	0.0697384	3.83083	0.000127711	0.00187364
MGEA5	11901.2	0.315592	0.0824565	3.82737	0.000129518	0.00189603
RPS3	23108.2	-0.437433	0.114295	-3.82724	0.000129588	0.00189603
GFRA2	1384.45	0.843044	0.220265	3.8274	0.000129504	0.00189603
IFT46	1233.92	-0.264356	0.0690829	-3.82665	0.000129901	0.00189719
C9orf40	507.959	0.384952	0.100593	3.82682	0.000129812	0.00189719
TXLNB	123.548	-1.32031	0.345162	-3.8252	0.000130666	0.00190566
PSMD5.AS1	409.837	-1.44167	0.376898	-3.8251	0.000130716	0.00190566
CLVS1	647.284	0.547473	0.143146	3.82459	0.000130991	0.00190796
LRRC58	1941.73	-0.414932	0.108703	-3.81711	0.000135025	0.00196494
KCNC3	676.242	-1.54245	0.404157	-3.81646	0.000135379	0.00196833
SESN3	6683.15	-0.376804	0.0987394	-3.81615	0.000135551	0.00196906
FIGNL2	119.721	0.608857	0.159558	3.81591	0.000135683	0.00196923
TCTEX1D1	60.2931	-1.87436	0.491863	-3.81073	0.000138556	0.00200912
ACVR2A	3481.29	0.256594	0.0673679	3.80885	0.000139614	0.00202266
PPAPDC2	948.175	0.290986	0.0764069	3.80838	0.000139882	0.00202474
RPS7	11032	-0.45627	0.119835	-3.80747	0.000140393	0.00203032
C1QTNF1	170.786	0.567129	0.148987	3.80658	0.000140904	0.00203589
SHD	1405.12	0.504161	0.132519	3.80443	0.000142133	0.00205183
NEK3	312.143	0.577253	0.15179	3.80296	0.000142977	0.00206217
DAAM2	76.5092	-1.13169	0.297603	-3.80269	0.000143133	0.00206259
C9orf64	28.4595	-1.81821	0.478215	-3.80207	0.000143493	0.00206594
AK2	2013.11	-0.341544	0.089844	-3.80152	0.000143808	0.00206865
L3HYPDH	52.3068	-0.895334	0.23557	-3.80072	0.000144278	0.00207356
SIK1	290.38	0.663148	0.174517	3.79991	0.000144751	0.00207852
ANO3	12.2491	-1.90735	0.502148	-3.79838	0.000145647	0.00208953
TP53I3	328.682	0.698001	0.183805	3.7975	0.000146162	0.00209508
SRSF12	1497.91	0.311229	0.0819789	3.79645	0.00014678	0.00210208
LINC00908	15.1582	-2.21249	0.582958	-3.79528	0.000147477	0.0021102
MKNK1	199.338	-0.393731	0.103755	-3.7948	0.000147763	0.00211171
ADAMTSL2	212.607	-0.938382	0.24729	-3.79466	0.000147843	0.00211171
DACH1	1263.25	0.758001	0.199905	3.79181	0.000149556	0.00213429
LINC00937	9.78876	1.97572	0.521219	3.79058	0.000150294	0.00214294
CPA4	26.027	-1.42452	0.375926	-3.78935	0.000151041	0.0021517
MTERF3	448.41	0.366031	0.0966104	3.78873	0.000151421	0.00215522
TMEM109	456.371	-0.527027	0.139122	-3.78823	0.000151727	0.00215769
CIB2	1188.42	0.370413	0.0978612	3.78509	0.000153654	0.00217952
FLNC	3120.07	-1.42792	0.37725	-3.78507	0.000153665	0.00217952
PTGDS	311.245	-2.74237	0.724456	-3.78542	0.000153448	0.00217952
PIGA	553.712	0.437042	0.115482	3.7845	0.000154015	0.00218258
BTBD17	1720.1	-0.779871	0.2062	-3.78212	0.000155501	0.00220171
TIMM22	1137.52	0.265458	0.0701935	3.7818	0.000155698	0.00220258
DDX11	765.409	-0.419843	0.111032	-3.78129	0.000156017	0.00220514
PAM	14755	-0.482345	0.127568	-3.78108	0.000156151	0.00220514
PRPSAP1	1709.46	0.207456	0.0548762	3.78044	0.000156551	0.00220886
ZNF385D	182.672	0.454762	0.120335	3.77912	0.000157383	0.00221868
CRYAB	172.454	-3.42572	0.906622	-3.77856	0.000157738	0.00222047
GDI1	31297.1	0.260591	0.0689671	3.77849	0.000157784	0.00222047
C3orf14	1285.42	0.350881	0.0928785	3.77785	0.000158186	0.0022242
PI16	27.2917	-2.45298	0.649541	-3.77648	0.000159057	0.00223452
LINC01515	14.7184	-2.08292	0.551779	-3.77491	0.000160064	0.00224671
RPL7A	34080.3	-0.393428	0.104272	-3.77308	0.000161243	0.0022613
RBFA	515.381	0.298086	0.0790322	3.77171	0.000162135	0.00227184
CASP8	20.6007	-1.82174	0.483276	-3.76956	0.000163537	0.00228951
SRC	5247.62	0.394869	0.104794	3.76807	0.000164517	0.00229729
APOL2	206.437	-0.752645	0.199742	-3.76808	0.000164505	0.00229729
CD164	1714.64	-0.423978	0.112506	-3.76849	0.000164237	0.00229729
EMX2	254.954	1.83536	0.487225	3.76697	0.000165243	0.00230347
SUSD1	387.451	-0.48263	0.128117	-3.76711	0.000165146	0.00230347
JAK2	1085.15	0.495379	0.131519	3.76659	0.000165489	0.00230492
PREX1	4140.79	-0.689653	0.183145	-3.76562	0.00016614	0.00231199
SCMH1	1052.86	0.438277	0.116401	3.76522	0.000166402	0.00231366
NEK7	567.352	-0.713145	0.189626	-3.76079	0.000169377	0.00235301
XYLT2	567.223	-0.379809	0.101038	-3.75909	0.000170533	0.00236502
PMEPA1	960.027	0.330855	0.088014	3.75911	0.000170516	0.00236502
ZFHX4	3587.15	0.794006	0.211353	3.75678	0.000172111	0.00238486
ANO2	83.724	0.779158	0.20744	3.75607	0.000172603	0.00238875
ACADVL	1582.66	-0.459568	0.122357	-3.75595	0.000172686	0.00238875
TENM1	1612.52	-0.645345	0.171841	-3.75547	0.000173018	0.0023913
DSC1	297.719	-0.913641	0.243364	-3.75422	0.000173882	0.0024012
WDR63	81.8167	-0.906369	0.241607	-3.75141	0.000175841	0.0024261
CCDC42B	7.07892	-2.18164	0.581616	-3.751	0.000176134	0.0024261
ELF4	54.4311	-1.45696	0.388407	-3.75111	0.00017605	0.0024261
CPNE4	366.119	0.815628	0.217468	3.75056	0.000176443	0.0024283
TNFRSF19	619.121	0.482113	0.128571	3.74978	0.000176991	0.00243377
LYRM9	465.913	-0.466238	0.124354	-3.74927	0.000177348	0.00243662
C7orf13	558.736	-0.308924	0.0824105	-3.7486	0.000177826	0.00244112
TMEM38B	1186.15	-0.731155	0.195083	-3.74792	0.000178305	0.00244562
HLA.DQB1	147.1	-1.45984	0.389592	-3.7471	0.000178892	0.00245161
C7orf57	13.4503	-2.18796	0.583966	-3.74672	0.000179163	0.00245325
CX3CL1	1914.82	-0.739405	0.19739	-3.74592	0.000179737	0.00245904
NUPR1	30.4672	-2.47697	0.661452	-3.74475	0.000180576	0.00246844
GNB2L1	24492.6	-0.407054	0.10875	-3.74304	0.000181806	0.00248315
DTX3L	36.3386	-1.42708	0.381366	-3.74201	0.000182551	0.00248913
LOC220729	552.93	0.320139	0.0855482	3.74221	0.000182412	0.00248913
KLHL7	5980.13	0.258291	0.0690435	3.74099	0.000183295	0.00249718
GPRIN2	454.735	0.721949	0.193087	3.73899	0.000184764	0.00251508
RPGR	211.608	-0.671256	0.179605	-3.73739	0.000185939	0.00252896
NMNAT3	116.339	0.750418	0.200836	3.73648	0.000186617	0.00253606
TRPM3	233.788	0.663022	0.177504	3.73525	0.000187531	0.00254634
CUBN	96.8487	-0.868349	0.232521	-3.7345	0.000188086	0.00255175
CLSTN1	22870.2	0.208447	0.0558319	3.73347	0.000188857	0.0025583
OSBPL5	1111.73	0.516783	0.138424	3.73333	0.000188966	0.0025583
C5orf49	306.049	-0.695204	0.186221	-3.73323	0.000189042	0.0025583
VEGFA	9494.59	-0.539446	0.144545	-3.73203	0.000189939	0.00256402
DFNA5	770.69	0.306195	0.082042	3.73217	0.000189838	0.00256402
ENTPD4	3105.11	0.298079	0.0798646	3.73231	0.000189733	0.00256402
VCAN	12448.8	1.07064	0.286932	3.73135	0.000190456	0.00256886
STK32B	536.675	0.66505	0.178347	3.72896	0.000192272	0.00259039
KANK1	241.769	0.569742	0.152794	3.72883	0.000192372	0.00259039
URB1	1638.85	-0.288029	0.0772663	-3.72774	0.000193203	0.00259942
NFIC	598.882	-0.58901	0.158024	-3.72735	0.000193502	0.00260129
CPM	14.8484	-1.79584	0.481867	-3.72683	0.0001939	0.00260448
HAS3	2495.29	0.722624	0.194018	3.72452	0.000195685	0.00262629
TRIM67	2945.96	0.459438	0.123378	3.72382	0.000196233	0.00263146
CCDC81	45.1266	-0.969665	0.260474	-3.7227	0.000197104	0.00263879
ANKRD29	18.9029	2.03669	0.54708	3.72283	0.000196998	0.00263879
PXMP4	338.689	-0.444488	0.119413	-3.72228	0.000197431	0.00263882
PSD2	4679.29	0.407238	0.109405	3.72229	0.000197423	0.00263882
APOC1	120.268	-1.3249	0.35601	-3.72154	0.000198012	0.00264289
CLDN5	77.4451	-1.37642	0.36986	-3.72148	0.000198062	0.00264289
YAP1	2218.61	-0.6289	0.169125	-3.71855	0.000200373	0.00267153
PRCP	1723.9	0.339856	0.0914022	3.71825	0.000200607	0.00267245
LTA4H	2747.37	-0.362932	0.0976208	-3.71777	0.000200986	0.00267531
FIRRE	94.8597	0.710671	0.191195	3.71699	0.000201614	0.00268147
IFIT1	170.7	-0.647695	0.174304	-3.71589	0.000202489	0.00268869
C21orf59	1718.05	-0.298351	0.0802893	-3.71595	0.000202438	0.00268869
TAGLN2	788.825	-1.06238	0.285993	-3.71472	0.000203426	0.00269673
SLC24A2	104.468	1.23062	0.331268	3.71488	0.0002033	0.00269673
KGFLP2	310.143	2.03363	0.54789	3.71175	0.000205834	0.00272642
USP2	209.466	-0.605033	0.163047	-3.7108	0.000206603	0.00273437
SLC4A4	764.164	-0.528193	0.14241	-3.70897	0.000208106	0.00274978
TRIM56	281.002	-0.806079	0.21733	-3.709	0.000208075	0.00274978
SIL1	703.318	-0.389252	0.104963	-3.70847	0.000208516	0.00275295
PARP9	71.7782	-1.29017	0.34804	-3.70696	0.000209762	0.00276716
LHFPL1	31.1513	-1.18463	0.319706	-3.70538	0.000211072	0.00278217
SSTR1	320.081	0.619987	0.167425	3.70307	0.000213005	0.00280338
PTOV1.AS1	470.272	-0.315805	0.0852873	-3.70284	0.0002132	0.00280338
MEGF9	4617.29	0.277445	0.0749252	3.70296	0.000213095	0.00280338
CDC42EP3	2631.84	0.358661	0.0969138	3.70083	0.000214894	0.00282338
CCDC22	624.583	-0.555862	0.150321	-3.69783	0.000217452	0.00285467
P2RY1	235.927	-1.08514	0.293637	-3.69553	0.000219427	0.00287828
ZNRF2	390.545	0.628383	0.170072	3.69481	0.000220055	0.00288418
DNAJC27.AS1	465.225	0.34773	0.0941462	3.69352	0.000221175	0.00289652
TAC3	86.1268	-1.2151	0.329025	-3.69304	0.00022159	0.00289961
CCDC148	95.7584	0.685088	0.185549	3.69223	0.000222299	0.00290655
ARMC3	90.49	-1.56717	0.424729	-3.68981	0.000224417	0.00293188
RIC3	1257.56	0.295307	0.0800501	3.68903	0.00022511	0.00293658
SH3BGRL2	2009.55	-0.448264	0.121514	-3.689	0.000225139	0.00293658
ZNF528	348.29	-1.9584	0.53109	-3.6875	0.000226464	0.00295149
ACTR10	3448.29	0.231144	0.0627638	3.68276	0.000230722	0.00300216
RNF144A	2429.26	0.293254	0.079625	3.68294	0.000230557	0.00300216
PTPN9	2909.31	0.253299	0.0687933	3.68203	0.000231387	0.0030084
OLFM1	6469.83	0.446447	0.121276	3.68126	0.000232087	0.00301509
ZNF714	1326.58	-0.428297	0.116491	-3.67667	0.000236302	0.00306739
ZNF827	2580.38	0.295247	0.080336	3.67515	0.00023771	0.0030832
DEGS1	1988.59	-0.2101	0.0571966	-3.67329	0.000239447	0.00310325
TICAM1	53.7491	-0.915045	0.249134	-3.67291	0.000239807	0.00310544
APOBEC3C	40.9473	-1.30025	0.354167	-3.67128	0.000241339	0.00312278
NMNAT1	383.501	-0.35127	0.0957603	-3.66823	0.000244239	0.00315277
DIXDC1	2416.78	0.216434	0.0589966	3.66858	0.000243905	0.00315277
KCNAB1	423.95	0.479911	0.130825	3.66834	0.000244132	0.00315277
SRGAP1	2577.55	0.526357	0.143604	3.66533	0.000247019	0.00318611
RELN	3879.48	0.876409	0.239154	3.66462	0.000247706	0.0031899
SLCO5A1	529.055	0.519572	0.141775	3.66476	0.000247575	0.0031899
RAB34	93.7455	-0.875672	0.238984	-3.66415	0.000248166	0.00319329
NOTCH4	191.144	-0.50216	0.137098	-3.66277	0.000249499	0.0032079
HK2	10424	-0.887422	0.242328	-3.66207	0.000250184	0.00320799
TNFAIP3	114.667	-0.496465	0.135561	-3.66229	0.000249971	0.00320799
CLIP2	10508.6	0.330893	0.0903596	3.66196	0.000250297	0.00320799
NR4A3	433.017	0.702888	0.191941	3.66199	0.00025026	0.00320799
ODF2L	1388.39	0.276509	0.0755347	3.66068	0.000251542	0.00322141
RILPL2	199.411	-0.640186	0.174962	-3.65901	0.000253193	0.00323744
WBP5	1833.13	-0.435797	0.119102	-3.65903	0.000253172	0.00323744
NWD1	25.0677	-1.55507	0.42503	-3.65874	0.000253458	0.00323828
SNCA	1957.09	1.18431	0.323741	3.6582	0.000253991	0.00324254
ARPC2	6867.02	0.170777	0.0466945	3.65733	0.000254855	0.003251
AQP4	140.212	-1.8982	0.519173	-3.6562	0.000255983	0.00326283
SMARCC2	13995.6	0.319392	0.0873708	3.65559	0.000256593	0.00326804
MEMO1	610.792	-0.313656	0.0858098	-3.65524	0.000256939	0.00326987
TMEM26	17.5913	-1.56465	0.428285	-3.65331	0.000258886	0.00329207
TMEM100	28.827	-1.34213	0.367521	-3.65184	0.000260372	0.00330838
RHOBTB2	5921.66	0.417845	0.114459	3.6506	0.000261634	0.0033218
WSB2	8756.23	0.297401	0.0814761	3.65017	0.00026207	0.00332475
C1orf158	24.0291	-1.98291	0.543579	-3.64788	0.000264418	0.00335191
TMTC2	3439.26	-0.519624	0.142618	-3.64347	0.000268987	0.00340717
CFAP52	80.7863	-1.31579	0.361179	-3.64303	0.000269443	0.00341028
SOX6	5010.16	-0.897157	0.246288	-3.64271	0.000269783	0.00341192
CERKL	13.1685	-2.54114	0.697665	-3.64235	0.000270158	0.003414
PACSIN3	57.2335	-1.4544	0.399423	-3.64125	0.000271322	0.00342605
CHAT	108.624	-1.30141	0.357496	-3.64036	0.000272255	0.00343515
PCDH18	732.615	-1.38964	0.381774	-3.63994	0.000272699	0.00343809
SMAD7	320.243	0.423683	0.116423	3.63916	0.000273525	0.00344315
INSR	2559.12	0.29123	0.0800247	3.63925	0.00027343	0.00344315
WAC.AS1	1436.19	0.31073	0.0854283	3.63732	0.000275489	0.00346518
RPS8	23324.2	-0.347506	0.0955839	-3.63561	0.000277323	0.00348285
FAS	66.0628	-1.0099	0.277766	-3.63581	0.000277111	0.00348285
ITGA7	436.338	-0.481201	0.132391	-3.63468	0.000278322	0.00349269
GNAO1	14498	0.233031	0.0641166	3.63448	0.000278538	0.0034927
FASTKD1	976.357	0.336564	0.0926105	3.63419	0.000278851	0.00349393
AJAP1	588.934	0.701849	0.193143	3.63384	0.000279232	0.003496
C17orf107	28.1013	-1.25277	0.345125	-3.6299	0.00028353	0.00354708
IGSF3	8692.61	0.41648	0.114769	3.62886	0.000284676	0.0035562
SMTNL2	159.121	-0.738508	0.203511	-3.62884	0.000284698	0.0035562
SV2A	14232.1	0.387479	0.106841	3.62668	0.000287094	0.00357814
TLE2	3027.28	-1.48985	0.410805	-3.62666	0.000287106	0.00357814
C8orf48	92.1177	0.566806	0.156289	3.62666	0.000287115	0.00357814
RPS14P3	27.307	-1.09297	0.301448	-3.62572	0.000288156	0.00358834
PAX6	589.803	1.23784	0.341531	3.6244	0.00028963	0.00360368
SLC5A7	219.704	-1.0607	0.29267	-3.62422	0.000289832	0.00360368
CCNB1IP1	1678.87	-0.675957	0.186562	-3.62322	0.000290958	0.00361491
LINC01521	892.446	0.242156	0.066887	3.62038	0.000294175	0.00365209
TMEM179	2281.9	-0.528676	0.146051	-3.61982	0.00029481	0.00365718
TMEM62	434.527	-0.409706	0.1132	-3.61932	0.000295382	0.00366147
ABCC1	1500.39	-0.400554	0.110693	-3.61859	0.000296214	0.00366899
LGALS3BP	2681.03	-0.556383	0.153848	-3.61645	0.000298672	0.00369379
WASH1	276.781	0.511279	0.141375	3.61648	0.000298639	0.00369379
SEMA3F	436.295	0.614461	0.170007	3.61432	0.000301143	0.00372151
SEMA7A	978.77	0.40987	0.113413	3.61395	0.000301569	0.00372395
DNM2	3534	-0.3097	0.085807	-3.60926	0.000307073	0.00378797
CDH9	752.815	-1.02872	0.285033	-3.60913	0.000307221	0.00378797
TMEM35	6043.95	0.426415	0.118157	3.60889	0.000307507	0.00378861
STX10	527.31	-0.36389	0.100892	-3.60673	0.000310084	0.00381747
APOBEC3F	16.4064	-1.60357	0.444672	-3.60619	0.000310724	0.00382244
SIX5	329.132	-0.633872	0.175803	-3.60558	0.000311452	0.00382561
IRF2	361.03	-0.368854	0.1023	-3.6056	0.000311429	0.00382561
ADGRB2	5343.89	0.355191	0.0985695	3.60346	0.000314008	0.00385117
DPYSL2	41183.9	0.300997	0.0835281	3.60354	0.000313909	0.00385117
DNM3	5197.2	0.496234	0.137731	3.60291	0.000314673	0.00385641
LOC728743	470.128	0.393055	0.109101	3.60269	0.000314945	0.00385683
NT5C2	4828.09	0.252554	0.0701307	3.6012	0.000316756	0.00387608
ZNF542P	2142.39	-0.394067	0.109493	-3.59901	0.000319436	0.00390593
DGCR6	114.04	-0.826252	0.229766	-3.59606	0.000323079	0.0039475
SMAP2	5511.13	0.189789	0.0527847	3.59554	0.000323716	0.00395027
SUSD6	806.792	-0.322365	0.0896583	-3.59548	0.000323792	0.00395027
EFHB	76.8965	-1.1204	0.311772	-3.59367	0.000326058	0.00397492
LOC101926941	10.2217	1.56652	0.436078	3.59229	0.000327783	0.00399295
ZMIZ1	13750.4	0.318555	0.0886913	3.59173	0.000328494	0.00399861
UNC13B	4387.91	-0.249545	0.0694899	-3.59109	0.000329294	0.00400534
PHF13	1417.12	0.30186	0.0840817	3.59008	0.000330577	0.00401793
COLEC12	77.7159	-2.60787	0.726577	-3.58926	0.00033162	0.0040276
EEF1A1	330755	-0.383864	0.106966	-3.58867	0.000332371	0.0040337
PIFO	322.693	-1.07239	0.298846	-3.58843	0.00033268	0.00403443
SDHAP1	262.481	0.421402	0.117476	3.58715	0.000334313	0.00404516
CEBPD	54.8528	-1.44191	0.40196	-3.5872	0.000334246	0.00404516
EGFL6	440.723	-0.547078	0.152506	-3.58725	0.000334178	0.00404516
PCDHGA5	17.4764	-1.35708	0.378442	-3.58596	0.000335837	0.00406058
CDK4	3301	-0.396572	0.110619	-3.58503	0.000337045	0.00407215
B3GNT9	42.3944	-1.62245	0.45276	-3.58346	0.000339076	0.00409364
CCDC176	253.06	0.39295	0.109666	3.58316	0.000339468	0.00409532
TRPC5	124.006	0.924126	0.257943	3.58267	0.000340102	0.00409992
TEAD1	2799.56	-0.495956	0.138496	-3.58101	0.000342269	0.00411686
KIF21A	10175.7	0.284531	0.079448	3.58135	0.000341824	0.00411686
CAMK4	574.555	0.488193	0.136326	3.58108	0.000342178	0.00411686
SEMA4G	571.863	0.482173	0.134659	3.58071	0.00034266	0.00411851
GNPTAB	4810.32	0.37792	0.105579	3.5795	0.000344256	0.00413463
STMN2	74054.6	0.442061	0.123512	3.57909	0.000344799	0.00413809
CALB1	826.285	0.743364	0.207716	3.57875	0.000345244	0.00414038
BCL2	1069.34	-0.34312	0.095934	-3.57662	0.00034806	0.00417106
GHDC	294.946	-0.739951	0.206948	-3.57554	0.000349504	0.00418528
DHRS4L2	176.224	-0.512421	0.143324	-3.57528	0.000349858	0.00418642
VWA5B1	223.291	-0.846746	0.236937	-3.57372	0.00035195	0.00420835
ANKRD6	1981.04	-0.555839	0.155559	-3.57317	0.000352682	0.00421401
RYR3	136.219	0.675539	0.18907	3.57295	0.000352984	0.00421451
ST5	1493.28	-0.287406	0.0804522	-3.57238	0.000353753	0.00421712
OLA1	6657.34	0.316675	0.0886497	3.57221	0.000353982	0.00421712
HERC5	45.0133	-1.20184	0.336413	-3.57252	0.000353558	0.00421712
LIPA	984.883	-0.48015	0.134429	-3.57176	0.000354585	0.00422001
USP18	29.7652	-0.902785	0.252767	-3.57161	0.000354796	0.00422001
SDHAP2	193.664	0.654753	0.183329	3.57145	0.000355005	0.00422001
ADD2	7719.59	0.3618	0.101311	3.57117	0.000355383	0.00422141
HS6ST1	5376.05	0.379986	0.106425	3.57044	0.000356382	0.00423018
XPNPEP1	2360.47	0.172027	0.048188	3.56991	0.000357109	0.00423367
CARD16	9.33007	-3.26837	0.91555	-3.56984	0.000357198	0.00423367
HBEGF	463.713	0.581914	0.163081	3.56826	0.000359358	0.00425617
PLTP	2397.71	-0.782136	0.219241	-3.56747	0.000360439	0.00426585
SERPING1	250.593	-0.833788	0.233739	-3.56717	0.000360852	0.00426763
EVL	13467	0.329343	0.0923555	3.56604	0.000362418	0.00428303
APH1B	808.06	0.383779	0.107655	3.56491	0.000363987	0.00429567
GOLM1	11233.1	0.230555	0.0646739	3.56488	0.000364017	0.00429567
RNF43	33.273	-1.31731	0.369604	-3.5641	0.000365107	0.0043054
LANCL1	5081.39	-0.411949	0.115602	-3.5635	0.000365942	0.00431211
CCND2.AS1	20.6735	1.13096	0.317399	3.5632	0.000366355	0.0043128
ZNF217	248.621	1.0981	0.308189	3.56308	0.000366532	0.0043128
RHOG	151.52	-0.55826	0.156695	-3.56272	0.000367034	0.00431558
SLC35F3	108.998	0.567288	0.159261	3.56201	0.000368029	0.00431948
SLC43A2	4509.62	0.339632	0.0953439	3.56218	0.000367787	0.00431948
LGALSL	1959.8	0.339058	0.09519	3.56191	0.000368165	0.00431948
PSMB8	11.5101	-2.05032	0.57584	-3.56057	0.000370056	0.00433853
MAP3K9	3383.46	0.347968	0.0977569	3.55953	0.000371524	0.0043526
DIRAS1	6798.11	0.351992	0.0989007	3.55905	0.000372203	0.00435741
GLYATL1	26.0749	-1.09593	0.307985	-3.55839	0.000373129	0.00436496
SLC4A2	1590.73	-0.343915	0.0966539	-3.55821	0.000373386	0.00436496
KITLG	2421.2	-0.402879	0.113243	-3.55765	0.000374182	0.00437112
PROS1	424.894	-0.500041	0.140566	-3.55735	0.000374619	0.00437307
X15.Sep	3990.91	-0.241863	0.0679966	-3.55698	0.000375136	0.00437595
TLDC1	1192.61	0.274384	0.0771466	3.55665	0.000375607	0.00437831
FAM19A1	93.8849	1.31312	0.369345	3.55528	0.00037758	0.00439502
TNPO3	5014.75	0.161531	0.0454342	3.55528	0.000377583	0.00439502
MTMR2	3209.1	0.269787	0.0759119	3.55395	0.000379497	0.00441413
CALCA	21.6913	-2.00035	0.56296	-3.55327	0.000380469	0.00442007
B3GALT5	111.013	-0.687112	0.193377	-3.55322	0.000380552	0.00442007
CAMK2G	2176.64	0.314165	0.0884385	3.55236	0.000381794	0.00443133
DPP10.AS1	22.8239	0.954557	0.268816	3.55096	0.000383823	0.00445169
UBE2Q2P1	32.8108	0.823746	0.232065	3.54964	0.000385765	0.00446463
DUSP14	551.788	-0.434011	0.122268	-3.54968	0.000385697	0.00446463
SH3KBP1	1311.71	0.288429	0.0812545	3.5497	0.000385664	0.00446463
RPLP0	47110	-0.440036	0.123974	-3.54942	0.000386083	0.00446514
SNTB1	238.96	-0.811042	0.22853	-3.54896	0.000386762	0.0044698
SMIM10	55.1142	-0.916837	0.258397	-3.54817	0.000387911	0.00447989
SCARB1	849.979	-0.669539	0.188742	-3.54738	0.00038909	0.00449031
RBFOX1	1222.44	0.856807	0.241575	3.54675	0.000390017	0.00449493
FAM13B	1816.12	0.475466	0.134058	3.54673	0.000390044	0.00449493
MIPOL1	193.874	-0.56044	0.158048	-3.54601	0.000391114	0.00450086
LAMA5	647.823	-0.594106	0.167541	-3.54603	0.000391088	0.00450086
FUT9	2490.07	0.560806	0.158291	3.54288	0.000395786	0.0045514
MTM1	435.975	-0.408519	0.115359	-3.54129	0.000398171	0.00457558
FOXD4	91.0802	0.888694	0.251066	3.53968	0.000400617	0.00460043
NUAK2	537.738	-0.420481	0.118812	-3.53905	0.000401574	0.00460816
DDIT4	12598.9	-0.653891	0.184794	-3.53849	0.000402429	0.00461471
SYNM	1441.92	0.620717	0.175548	3.53588	0.000406422	0.00465721
NECAP2	484.163	-0.473307	0.1339	-3.53478	0.000408111	0.0046674
RMST	209.387	-0.697393	0.197279	-3.53507	0.000407668	0.0046674
GMCL1	490.993	-0.354471	0.100282	-3.53474	0.000408175	0.0046674
TSPO	338.055	-0.796675	0.225433	-3.53397	0.000409363	0.00467769
NLN	3503.07	0.293051	0.0829324	3.5336	0.000409933	0.00468091
KCNB2	379.058	0.514381	0.145638	3.53192	0.000412554	0.00470752
TSPAN15	233.535	-0.428876	0.121454	-3.53118	0.000413707	0.00471737
C1orf115	125.396	0.778214	0.220646	3.52699	0.00042032	0.0047894
KCTD6	395.215	0.457856	0.129852	3.52598	0.000421925	0.00480432
ANKIB1	3812.31	0.261981	0.074305	3.52575	0.00042229	0.0048051
ANKRD36BP2	79.0593	0.965708	0.274153	3.52251	0.000427474	0.00486069
CNKSR2	1264.16	0.416689	0.118323	3.52161	0.000428932	0.00487384
LOC100996255	20.6974	-1.17053	0.332418	-3.52126	0.000429496	0.00487684
SCRN1	15933	0.340471	0.0967119	3.52047	0.000430784	0.00488805
NAPG	1730.7	0.249242	0.0708125	3.51974	0.000431971	0.0048935
FOSL2	537.771	-0.92227	0.262037	-3.51962	0.000432169	0.0048935
ATP6V0E1	974.575	-0.452582	0.128585	-3.5197	0.000432034	0.0048935
TRHDE	114.212	0.986643	0.280391	3.51881	0.00043349	0.00490503
TAP1	117.615	-0.87514	0.24878	-3.51773	0.000435255	0.00492156
CRMP1	51836.9	0.327844	0.0932132	3.51714	0.000436227	0.00492913
RPL13A	48229.3	-0.398269	0.113282	-3.51574	0.000438525	0.00494819
RNF44	3466.87	0.350484	0.0996876	3.51583	0.000438388	0.00494819
C11orf87	1057.32	1.3194	0.375772	3.51117	0.000446136	0.00503057
EIF4A3	4695.13	-0.193206	0.0550398	-3.51029	0.000447618	0.00504378
TEKT4	13.2175	-1.87319	0.533658	-3.51009	0.00044795	0.00504402
MED17	2115.12	0.198676	0.0566098	3.50956	0.000448845	0.0050506
NAP1L3	10854.5	0.277354	0.0790457	3.50879	0.000450156	0.00506184
SLC12A4	394.763	-0.753859	0.214874	-3.50838	0.00045084	0.00506601
TMEM39A	438.159	-0.574688	0.16387	-3.50697	0.000453245	0.005086
BAG6	17453.7	0.235899	0.0672644	3.50705	0.000453112	0.005086
PPP1R3D	278.012	0.562341	0.160408	3.50569	0.000455433	0.00510702
NRG1	739.675	0.529196	0.151007	3.50444	0.00045757	0.00512744
SLC1A2	10008.5	0.536945	0.153268	3.50331	0.000459523	0.00514493
DBN1	27195.2	0.347591	0.099222	3.50316	0.000459765	0.00514493
RSPH4A	291.922	-0.576098	0.164586	-3.50028	0.000464771	0.00519736
RAB8B	4194.9	0.316357	0.0903924	3.49982	0.000465579	0.00520281
SSFA2	1449.36	-0.512747	0.146556	-3.49866	0.000467611	0.00522192
ZSCAN20	285.033	0.359616	0.102834	3.49707	0.000470399	0.00524944
RIMKLA	2647.43	0.350198	0.100149	3.49676	0.000470938	0.00525103
PIK3R3	12126.8	0.46004	0.131567	3.49661	0.000471206	0.00525103
CIRH1A	1947.78	0.350061	0.100119	3.49644	0.000471512	0.00525103
AXL	526.797	-0.481254	0.137683	-3.49538	0.00047338	0.00526822
NUP37	390.757	-0.469894	0.134473	-3.49435	0.000475222	0.0052851
ZNF652	2117.33	0.275418	0.078844	3.4932	0.000477276	0.00530198
ST8SIA5	64.3324	1.26537	0.362245	3.49313	0.000477394	0.00530198
MYO9B	2048.88	-0.281146	0.0805113	-3.492	0.000479412	0.00532075
STOM	222.81	-0.806218	0.230895	-3.4917	0.000479952	0.0053231
APOPT1	1658.11	0.227902	0.0652748	3.49142	0.000480464	0.00532514
CERS5	1805.15	0.226606	0.0649226	3.4904	0.000482301	0.00534185
SURF4	6960.47	-0.282401	0.0809181	-3.48996	0.000483093	0.00534698
TMEM128	1281.95	-0.219674	0.0629523	-3.48953	0.00048388	0.00534839
SYPL1	489.277	-0.443338	0.127043	-3.48968	0.000483597	0.00534839
CAPS2	171.923	-0.558702	0.160119	-3.4893	0.000484288	0.00534926
UBE2H	11162	0.212346	0.0608727	3.48836	0.000485989	0.00536439
LPGAT1	3778.53	0.462162	0.132504	3.48791	0.000486816	0.00536987
N4BP3	874.037	0.693119	0.198797	3.48656	0.000489267	0.00539324
NWD2	810.1	-0.948955	0.27227	-3.48535	0.000491502	0.0054142
UBA6.AS1	784.966	0.313148	0.089898	3.48337	0.000495149	0.00545067
GLYCTK.AS1	175.145	-0.584658	0.167878	-3.48263	0.000496509	0.00546194
RMRP	22.2759	-1.59581	0.458569	-3.47998	0.000501443	0.00551248
LNX2	939.26	-0.317578	0.0912775	-3.47926	0.000502799	0.00552364
ADCY9	960.204	0.23265	0.0669342	3.47581	0.000509314	0.00559143
MRPL10	1661.42	-0.333139	0.0958552	-3.47544	0.000510007	0.00559202
NMU	155.321	0.999539	0.287602	3.47542	0.000510057	0.00559202
DUSP16	3793.75	0.30983	0.0891831	3.47409	0.00051259	0.0056122
LINC00571	15.0027	1.3892	0.39987	3.47413	0.000512507	0.0056122
DDAH1	5104.63	0.326276	0.0939274	3.4737	0.000513334	0.00561535
ERF	1003.26	-0.519037	0.149426	-3.47353	0.00051366	0.00561535
PPEF1	79.5532	-0.803264	0.231262	-3.4734	0.000513916	0.00561535
SVEP1	69.7027	-0.821292	0.236696	-3.46982	0.000520805	0.00568679
TRAPPC6A	571.317	-0.521547	0.150323	-3.46951	0.000521408	0.00568955
PAXBP1.AS1	407.485	0.283627	0.0817855	3.46793	0.000524478	0.00571921
MAF1	2975.08	0.493394	0.142291	3.4675	0.000525332	0.00572468
FKBP9	2293.78	-0.519634	0.149869	-3.46725	0.000525821	0.00572615
FAM217B	2573.35	0.213456	0.0615671	3.46705	0.000526199	0.00572643
LRP2	2255.16	-1.57949	0.455681	-3.46621	0.000527841	0.00574045
TMEM9	4650.73	-0.360282	0.10395	-3.46591	0.000528446	0.0057421
ALPK3	157.989	-0.87351	0.252039	-3.46578	0.000528701	0.0057421
ZNRF1	4287.46	0.374695	0.108123	3.46546	0.000529318	0.00574496
TCP11L1	626.831	0.314026	0.0906221	3.46522	0.000529798	0.00574633
LITAF	1600.81	-1.6802	0.485058	-3.46393	0.000532355	0.0057702
BEX5	1607.6	0.634538	0.183386	3.46011	0.000539945	0.00584857
DAB2	41.6225	-1.03634	0.299548	-3.45969	0.000540804	0.00585396
HDAC1	949.348	-0.42336	0.122379	-3.45942	0.000541342	0.00585588
SRXN1	729.911	0.488964	0.141526	3.45494	0.000550416	0.00595007
KCNIP3	228.138	-0.643696	0.186323	-3.45474	0.000550832	0.0059506
NYNRIN	2815.7	-0.47637	0.137919	-3.45398	0.000552377	0.00596332
SLC18A3	694.027	-1.34502	0.389469	-3.45348	0.000553409	0.00596653
ATXN7L1	572.041	0.38035	0.110133	3.45355	0.000553257	0.00596653
NMB	187.78	-0.901999	0.261227	-3.45294	0.000554516	0.00596976
RNF112	900.872	-0.47796	0.138434	-3.45262	0.000555181	0.00596976
ZNF804A	877.205	0.55046	0.159431	3.45266	0.000555084	0.00596976
TTBK1	2453.17	0.38661	0.111973	3.45271	0.000554995	0.00596976
GLIS3	452.21	-1.24793	0.361568	-3.45144	0.000557597	0.00599177
GRIN3A	510.421	-0.838684	0.243053	-3.45062	0.000559306	0.00600615
YWHAB	18444	0.22442	0.0650598	3.44944	0.000561749	0.00602789
TMEM74	243.55	0.537306	0.155773	3.44929	0.000562073	0.00602789
PRLHR	97.9583	-1.39147	0.403774	-3.44617	0.000568599	0.00609384
TRIM8	3220.04	0.2713	0.0787513	3.44502	0.000571017	0.00610766
PHACTR3	1978.66	0.463967	0.13467	3.44521	0.000570611	0.00610766
RP9P	504.138	0.385562	0.111918	3.44502	0.00057101	0.00610766
CRISPLD1	2113.87	-0.839299	0.243893	-3.44126	0.000579011	0.00618909
TRIM71	72.2967	0.635692	0.18478	3.44027	0.000581132	0.00620766
KLHDC4	861.377	0.340852	0.0990835	3.44005	0.00058161	0.00620869
SLFN13	29.7453	-1.60482	0.466594	-3.43945	0.000582904	0.00621841
TLL1	36.5694	-1.19851	0.348532	-3.43874	0.000584423	0.00623052
SLC17A6	664.036	0.945527	0.275072	3.43738	0.000587369	0.00624596
LIN7C	2726.85	0.314188	0.091404	3.43736	0.000587411	0.00624596
TPT1.AS1	628.754	0.254163	0.0739335	3.43773	0.000586621	0.00624596
ARHGAP33	5910.27	0.416128	0.121048	3.43771	0.000586654	0.00624596
SLC38A6	133.484	-0.595967	0.17345	-3.43596	0.000590464	0.00627431
LINC01152	59.1866	0.742575	0.216155	3.43538	0.000591725	0.00628359
MYOZ1	56.8162	-0.842534	0.24533	-3.43429	0.0005941	0.00630469
RNF24	1500.28	0.257861	0.0751021	3.43347	0.000595906	0.00631972
POC1B	329.895	-0.547191	0.159408	-3.43265	0.000597719	0.00633067
KIF26A	2288.59	0.533123	0.155304	3.43276	0.000597462	0.00633067
CCDC85A	1051.32	0.586148	0.170804	3.4317	0.000599818	0.00634876
THYN1	1331.12	-0.420831	0.122638	-3.4315	0.000600256	0.00634925
SH3BGRL3	1558.82	0.353964	0.10324	3.42856	0.000606791	0.00641002
JAM2	1627.89	-0.511539	0.149198	-3.42858	0.000606745	0.00641002
RPL10A	12807.3	-0.319763	0.0933003	-3.42725	0.000609736	0.00643694
GLS	2232.76	0.368343	0.107503	3.42634	0.000611765	0.00645416
WNT3	413.958	-0.370415	0.108118	-3.42603	0.000612463	0.00645732
CHN2	2526.84	0.453308	0.132327	3.42567	0.000613288	0.00646183
SEMA4D	1724.16	0.621743	0.181538	3.42486	0.000615108	0.0064768
DUSP4	12589.2	0.570765	0.166685	3.42421	0.000616588	0.00648817
PSME1	1168.06	-0.270452	0.0790029	-3.42332	0.000618618	0.00650531
TSTD1	143.736	1.3225	0.386388	3.42271	0.000620002	0.00650651
ECHDC3	59.3604	-0.969637	0.283313	-3.42249	0.000620512	0.00650651
AVPR1A	21.6725	-1.47914	0.432214	-3.42223	0.000621096	0.00650651
C3orf80	83.2849	0.827358	0.241728	3.42268	0.000620075	0.00650651
KIF3A	7482.45	0.343223	0.100289	3.42235	0.000620832	0.00650651
PNPLA4	772.367	-0.289562	0.0846124	-3.42221	0.000621138	0.00650651
FUT8	2157.11	0.351495	0.102798	3.41929	0.000627839	0.0065685
ARID1B	4798.2	0.267908	0.0783561	3.41911	0.000628271	0.0065685
CLDN3	118.177	-0.99636	0.291404	-3.41917	0.000628115	0.0065685
NBPF1	2326.07	0.235734	0.0689599	3.41842	0.000629855	0.00657659
MTX2	1960.93	0.232938	0.0681401	3.41852	0.000629623	0.00657659
FNIP2	4530.68	0.331396	0.0969611	3.41782	0.000631244	0.00658686
CLIC1	1970.79	-0.669582	0.196063	-3.41513	0.000637515	0.00664802
CCDC114	21.749	-1.12668	0.330021	-3.41396	0.000640256	0.00667231
CNBP	9513.2	-0.250793	0.0734686	-3.41361	0.000641093	0.00667675
RAB20	95.2577	-1.13134	0.331449	-3.4133	0.000641805	0.00667988
OSBPL10	134.01	0.954322	0.279608	3.41307	0.000642344	0.0066812
ASIC2	937.469	-0.917356	0.268851	-3.41214	0.000644562	0.00669997
INF2	796.474	-0.531496	0.155825	-3.41085	0.000647602	0.00672727
TFPI	69.3478	-1.65735	0.485953	-3.41052	0.000648389	0.00673113
TLE4	3643.35	0.880456	0.258194	3.41005	0.000649505	0.00673841
ANKRD30BL	12.9686	-1.82395	0.534936	-3.40966	0.000650438	0.00674378
NTRK1	3036.24	-1.29482	0.379775	-3.40945	0.000650948	0.00674475
SPTLC1	1866.05	-0.244646	0.0717807	-3.40824	0.000653839	0.00677039
RENBP	343.535	-0.735015	0.215671	-3.40804	0.00065431	0.00677094
PGBD2	254.63	0.356481	0.104692	3.40504	0.000661551	0.00684151
TSSC2	286.654	0.609062	0.178917	3.40416	0.000663671	0.00685907
GUSB	591.414	-0.444966	0.130764	-3.40281	0.000666972	0.00688808
FAM120A	1400.01	-0.284821	0.0837053	-3.40266	0.000667328	0.00688808
SYNGR2	200.268	-0.741537	0.21823	-3.39796	0.000678893	0.007003
ATF4	9672.13	-0.360055	0.105969	-3.39775	0.000679434	0.00700413
GRTP1	55.7616	-0.624512	0.183836	-3.39712	0.000680992	0.00701573
FHOD3	3278.88	0.461175	0.135791	3.39621	0.000683261	0.00703464
PTPN3	203.08	0.59329	0.174745	3.39518	0.000685825	0.00705656
CCDC67	11.8361	-1.55231	0.457249	-3.39489	0.000686574	0.00705979
DERA	367.413	-0.550231	0.162102	-3.39434	0.000687936	0.00706484
MAB21L2	279.148	0.830484	0.244659	3.39445	0.000687654	0.00706484
LGI2	683.749	0.609037	0.179455	3.39382	0.000689248	0.00707384
UBE3C	2116.86	0.225603	0.0664955	3.39276	0.000691926	0.00709683
MFAP4	255.538	-1.38995	0.409797	-3.3918	0.000694341	0.00711351
ADGRB3	2684.39	0.256814	0.0757169	3.39177	0.000694429	0.00711351
ADGRA2	76.6057	-0.776964	0.229098	-3.39141	0.000695352	0.00711847
NMRAL1	526.875	0.536283	0.158179	3.39036	0.000698002	0.0071411
RGS5	126.893	-0.648226	0.191216	-3.39002	0.000698867	0.00714544
IGF2R	3904.08	-0.250362	0.0738894	-3.38833	0.000703195	0.00718059
NPR2	275.725	-0.344134	0.101565	-3.3883	0.00070327	0.00718059
ARMCX6	1151.27	0.262891	0.077591	3.38816	0.000703632	0.00718059
CCP110	3547.09	0.291473	0.0860513	3.38721	0.00070608	0.00720104
RBPMS2	79.6895	0.723541	0.213632	3.38685	0.000707002	0.00720591
PDCD6IPP2	76.8711	-1.00215	0.295927	-3.38648	0.000707948	0.00721102
BLCAP	12848.2	0.531427	0.156951	3.38595	0.000709313	0.0072204
TMEM159	501.665	0.403526	0.119199	3.38531	0.000710981	0.00723283
ARHGEF37	226.166	-0.554389	0.163967	-3.38109	0.000721979	0.00734012
ABCA4	22.5117	-1.38438	0.409653	-3.3794	0.000726448	0.00735331
SBK1	26763.8	0.418456	0.123814	3.37971	0.000725629	0.00735331
CLIP3	9037.22	0.22106	0.0654111	3.37955	0.000726052	0.00735331
CHN1	2921.99	0.291895	0.0863512	3.38033	0.000723995	0.00735331
MLF1	1538.45	-0.399501	0.118187	-3.38025	0.000724208	0.00735331
AP1AR	1980.42	0.2526	0.0747464	3.37942	0.000726385	0.00735331
RGS17	567.419	0.401826	0.118881	3.38008	0.000724645	0.00735331
GLTSCR2	7694.08	-0.381804	0.113	-3.3788	0.000728029	0.00736471
SYT7	2782.39	0.528661	0.156484	3.37837	0.000729157	0.00737153
LGALS3	37.0394	-1.19407	0.353493	-3.37792	0.000730351	0.007379
CHST2	1798.22	0.709494	0.210083	3.3772	0.000732265	0.00739337
NQO2	454.065	0.385967	0.114291	3.37705	0.000732684	0.00739337
VIPR2	72.4122	-1.60758	0.476714	-3.3722	0.00074569	0.00751993
FBXO34	1759.52	0.141796	0.0420592	3.37136	0.00074799	0.00753376
TRIM36	3607.46	0.493154	0.146275	3.37142	0.000747827	0.00753376
PLAUR	57.126	-0.940787	0.27911	-3.37067	0.000749867	0.007546
IDH1	8383.16	0.240094	0.071236	3.3704	0.0007506	0.007546
RBM10	4263.55	-0.19366	0.0574563	-3.37055	0.000750177	0.007546
ZNF577	245.817	0.484907	0.143899	3.36977	0.000752319	0.00755859
BMP1	834.31	-0.739051	0.219355	-3.3692	0.000753863	0.00756942
SCN3B	10972.8	0.331076	0.0982805	3.36869	0.000755264	0.0075788
C14orf132	15422.8	0.261907	0.0777918	3.36677	0.000760536	0.00762699
KAT6B	2153.21	0.577207	0.171535	3.36496	0.000765559	0.00767261
PCK2	746.701	-0.73955	0.219793	-3.36476	0.000766097	0.00767326
ANO6	608.029	-0.659392	0.196017	-3.36395	0.000768354	0.00769112
NF2	2768.23	0.189879	0.0564778	3.36201	0.000773787	0.00774073
TRIP6	354.411	-0.599315	0.178289	-3.36147	0.000775281	0.0077509
LAMP3	63.2732	-1.22777	0.365292	-3.36108	0.000776386	0.00775717
AQP1	53.2865	-1.24311	0.369876	-3.36089	0.000776917	0.00775769
GALNS	588.24	-0.345346	0.102799	-3.35944	0.000780996	0.00778884
PEX13	1040.22	0.239632	0.0713276	3.3596	0.000780558	0.00778884
JOSD1	1856.13	0.199266	0.0593217	3.35908	0.000782023	0.00779429
KIF16B	264.767	-0.377049	0.112307	-3.3573	0.000787068	0.00783635
CPA2	18.469	-1.11651	0.332566	-3.35725	0.000787209	0.00783635
ZFP3	283.097	-0.941665	0.280574	-3.35621	0.000790181	0.0078563
NPC1	835.085	-0.291341	0.0868023	-3.35638	0.000789699	0.0078563
X03.Sep	39333.3	0.293665	0.0875043	3.35601	0.00079077	0.00785734
INHBE	31.1644	-1.85431	0.552743	-3.35474	0.000794408	0.00788866
TRIB1	681.625	0.333027	0.0992797	3.35444	0.000795272	0.0078924
RPL13AP5	390.79	-0.428682	0.127803	-3.35425	0.000795812	0.00789294
WNT5B	672.869	0.546746	0.163031	3.35363	0.000797579	0.00790563
SMIM15	1990.66	-0.419166	0.12501	-3.35306	0.000799223	0.00791709
SCAI	2126.52	0.318479	0.094987	3.35287	0.00079977	0.00791767
SLC5A12	29.3692	-1.97297	0.588548	-3.35226	0.000801543	0.0079277
TACC1	1258.84	-0.302324	0.0901872	-3.35219	0.00080176	0.0079277
ACVR1B	6984.34	0.272861	0.0814024	3.352	0.000802295	0.00792816
FLJ10038	1234.64	0.360381	0.107526	3.35156	0.000803576	0.00793598
MTMR4	4530.12	0.256346	0.0765084	3.35056	0.000806491	0.00795993
DKFZP586I1420	301.678	0.534919	0.15966	3.35036	0.000807054	0.00796065
UCHL3	328.616	0.296271	0.0884778	3.34854	0.000812387	0.00800838
ATN1	11440.2	0.278766	0.0832697	3.34774	0.000814723	0.00802653
YPEL2	437.303	0.388502	0.116085	3.34671	0.000817759	0.00805155
FAM169A	3924.21	0.295931	0.08843	3.3465	0.000818394	0.00805292
ALDOA	32704.6	-0.451828	0.135043	-3.34582	0.000820401	0.00806777
MORN5	55.7784	-0.829708	0.248004	-3.34554	0.00082122	0.00807093
GCDH	610.469	-0.364235	0.108886	-3.3451	0.000822532	0.00807405
FAHD2B	414.944	-0.333135	0.099584	-3.34526	0.000822041	0.00807405
LOC100506990	614.456	0.302301	0.0904479	3.34226	0.000830984	0.00815208
CACNG8	3622.95	0.390055	0.11675	3.34094	0.000834939	0.00818593
RCHY1	2247.58	0.215662	0.0645624	3.34036	0.000836689	0.00819813
SUV39H1	374.411	-0.403256	0.120782	-3.33872	0.000841668	0.00824195
TMEM67	528.487	-0.3783	0.113347	-3.33754	0.000845239	0.00827192
ATP1A3	26510.8	0.309993	0.0929089	3.33652	0.000848334	0.00829721
ZNF641	1939.52	0.239368	0.0717512	3.33608	0.0008497	0.00830322
GLP1R	30.1236	-1.13169	0.339237	-3.33599	0.000849972	0.00830322
TUBB3	61234.3	0.452177	0.135582	3.33509	0.000852727	0.00832512
LHX9	127.467	-0.770146	0.230969	-3.33441	0.000854805	0.00834038
SUV420H1	6178.31	0.192613	0.0577926	3.33282	0.000859692	0.00838304
MYCN	2036.04	-0.354775	0.106487	-3.33162	0.000863408	0.00841421
OPCML	3305.33	0.37939	0.113891	3.33117	0.000864804	0.00842275
LOC101926975	12.7135	1.65135	0.495845	3.33037	0.000867312	0.00844212
NRP1	3465.84	1.08718	0.326769	3.32705	0.000877697	0.00853132
MYO1H	77.7541	0.62778	0.188696	3.32694	0.000878054	0.00853132
IFI30	39.5238	-0.984672	0.295962	-3.32702	0.000877792	0.00853132
ITIH5	831.095	-2.13387	0.641615	-3.32578	0.000881705	0.00856167
TRIOBP	2258.88	0.383239	0.115278	3.32447	0.000885873	0.00859699
EEPD1	410.969	0.507172	0.152578	3.32402	0.000887314	0.00860583
CAPSL	14.2711	-2.56916	0.773072	-3.32331	0.000889564	0.0086225
CLN5	779.924	-0.287488	0.086517	-3.3229	0.000890861	0.00862991
GNB1	38099.8	0.195416	0.0588306	3.32168	0.000894781	0.00866272
ST6GALNAC3	603.759	-0.298494	0.0898793	-3.32105	0.000896781	0.0086759
CFAP54	70.7338	-0.813672	0.245014	-3.32092	0.000897212	0.0086759
CMYA5	28.46	-1.00453	0.302509	-3.32067	0.000898019	0.00867853
PEAK1	1299.43	0.322212	0.0970854	3.31885	0.000903875	0.00872469
LINC00261	170.822	-5.49776	1.65661	-3.31869	0.000904408	0.00872469
NPR3	72.0121	1.28655	0.387664	3.31872	0.000904307	0.00872469
LINC01512	66.6918	-0.720485	0.21711	-3.31852	0.000904961	0.00872484
ANO8	1947.28	0.334373	0.100776	3.31798	0.000906709	0.0087365
SMARCA4	27568.5	0.202467	0.0610432	3.31678	0.000910612	0.00876369
ERMN	12.0656	-1.88207	0.567414	-3.31692	0.00091015	0.00876369
CHST14	359.3	-0.417321	0.125831	-3.31653	0.00091143	0.00876637
MCTS1	1884.08	0.191008	0.0576161	3.31519	0.000915823	0.00880341
RGS4	228.263	-0.80659	0.243361	-3.31437	0.000918486	0.00882377
POU6F2	119.136	0.925582	0.279281	3.31416	0.000919185	0.00882526
PPM1B	3128.23	0.21584	0.0651628	3.31232	0.000925269	0.00887843
FGF14.AS2	114.229	-0.464576	0.140267	-3.31208	0.000926066	0.00888082
HYKK	8.76979	-1.68681	0.50941	-3.31129	0.000928655	0.00890038
F8A1	276.096	0.449182	0.135675	3.31072	0.000930563	0.00891341
CITED1	439.904	-0.72107	0.217824	-3.31033	0.000931849	0.00892046
HEATR5B	2642.56	0.236303	0.0713989	3.30962	0.000934216	0.00893785
NUP62CL	103.689	-0.597693	0.180607	-3.30936	0.000935108	0.00894111
SDHD	1053.66	-0.321105	0.0970678	-3.30805	0.000939491	0.00896856
NUDT14	467.836	0.566166	0.17115	3.308	0.000939637	0.00896856
CYP1B1	36.4741	-2.90944	0.879485	-3.30811	0.000939264	0.00896856
RERG	87.0603	-1.64795	0.498268	-3.30736	0.000941787	0.00897851
FAM50B	252.669	-0.757238	0.228949	-3.30746	0.000941468	0.00897851
TOMM40L	866.76	0.367691	0.111209	3.30631	0.000945339	0.00900456
DPF3	232.107	0.543511	0.164402	3.30599	0.000946423	0.00900456
CNTD2	25.2892	-1.15732	0.350078	-3.30589	0.000946739	0.00900456
PHF21B	3623.09	0.528157	0.159757	3.30601	0.000946334	0.00900456
CARM1	2745.08	0.270663	0.0819091	3.30443	0.000951712	0.00904656
THY1	2508.36	0.430301	0.130359	3.30089	0.00096379	0.00915483
EPS8	1811.03	-0.23276	0.070517	-3.30076	0.000964231	0.00915483
C4orf47	58.9662	-0.816461	0.247408	-3.30006	0.000966625	0.00917219
SHOC2	3167.95	0.237277	0.0719064	3.2998	0.000967532	0.00917476
NKX2.1.AS1	313.047	-0.982787	0.29785	-3.2996	0.000968212	0.00917476
TTC9	2550	0.390797	0.118441	3.29949	0.000968592	0.00917476
ZBTB46	1836.03	0.401598	0.121733	3.29899	0.000970333	0.00918589
FZD2	2170.81	-0.560295	0.169874	-3.29829	0.000972745	0.00919471
BZW2	4052.55	0.337529	0.102327	3.29854	0.000971876	0.00919471
CAMSAP1	11955.6	0.277789	0.0842236	3.29823	0.000972964	0.00919471
LINC00909	758.186	0.28224	0.0855828	3.29786	0.000974252	0.00920152
PTK7	1801.72	-0.391847	0.118968	-3.29372	0.000988709	0.00933263
CCSAP	3349.91	0.412273	0.125183	3.29335	0.000990015	0.00933952
ABCA8	90.3911	-2.93207	0.890602	-3.29223	0.00099395	0.0093712
RAB29	280.832	-0.580924	0.176522	-3.29093	0.000998556	0.00940916
AFF3	1535.99	0.571697	0.173731	3.2907	0.000999376	0.00941142
LINC00662	355.959	0.407024	0.123731	3.28958	0.00100338	0.00944367
ATP2A3	80.7936	0.494643	0.150433	3.28813	0.00100854	0.00948668
FLVCR1	1042.71	0.333552	0.101473	3.28709	0.00101228	0.00951082
LOC401320	146.505	0.370233	0.112632	3.2871	0.00101223	0.00951082
LINC00910	21.1758	-1.02946	0.313247	-3.28642	0.0010147	0.00952812
DDN	402.318	-0.848201	0.258111	-3.28618	0.00101555	0.00953055
SCARF2	383.789	-0.856833	0.260792	-3.2855	0.00101801	0.00954666
LINC01503	34.4503	1.05214	0.320248	3.28538	0.00101844	0.00954666
PDIA5	332.174	-0.632814	0.192685	-3.28419	0.00102274	0.00958141
AP3B2	3115.15	0.308579	0.0939795	3.28347	0.00102537	0.00960044
ANXA2	1972.39	-1.7326	0.527783	-3.28279	0.00102785	0.00960703
ATRAID	1391.92	-0.441472	0.134476	-3.2829	0.00102746	0.00960703
GATS	2252.69	0.295075	0.0898796	3.283	0.00102708	0.00960703
STAG3	256.838	0.325496	0.0992377	3.27997	0.00103819	0.00969812
ADRA2A	250.595	1.03515	0.315731	3.27858	0.0010433	0.00974023
LMF1	843.672	0.266272	0.081228	3.27808	0.00104516	0.00975204
SLC35D2	133.653	-0.848881	0.258971	-3.2779	0.00104582	0.00975258
OBSL1	7160.89	-0.381139	0.116288	-3.27754	0.00104717	0.00975956
RERE	8026.17	0.231261	0.0706076	3.2753	0.0010555	0.0097952
ATP1A2	5730.89	-0.674013	0.205747	-3.27593	0.00105314	0.0097952
ALDH1L2	762.379	-0.5248	0.160224	-3.27542	0.00105505	0.0097952
TEX26	52.235	-0.808866	0.246966	-3.27521	0.00105582	0.0097952
PRIMA1	791.386	-1.49271	0.455646	-3.27604	0.00105274	0.0097952
CYP27A1	133.172	0.639737	0.19529	3.27583	0.00105353	0.0097952
RAP1GDS1	2699.9	0.416057	0.127011	3.27575	0.00105383	0.0097952
ARHGAP10	42.6765	-1.22306	0.373417	-3.27532	0.00105541	0.0097952
MYLK2	19.0214	-1.01025	0.30855	-3.2742	0.00105961	0.00982471
MGC2889	54.3896	0.830077	0.253549	3.27383	0.001061	0.00983198
ZNF619	154.238	1.15676	0.353366	3.27355	0.00106207	0.0098363
WFS1	1151.36	-0.495773	0.151555	-3.27124	0.00107076	0.00991109
FOXJ1	559.498	-1.16537	0.356276	-3.27098	0.00107177	0.00991481
NEDD1	786.674	-0.636207	0.194651	-3.26845	0.00108139	0.0099981
RPS6KC1	2040.76	0.237003	0.0725188	3.26816	0.00108249	0.00999909
ADGRL3	4201.35	0.261155	0.0799118	3.26805	0.00108293	0.00999909
PCDHB6	97.151	-1.29372	0.395884	-3.26794	0.00108335	0.00999909
F2R	3789.72	0.235957	0.0722339	3.26657	0.00108858	0.0100416
FAM78B	110.584	0.791044	0.242332	3.2643	0.00109735	0.0101168
ANXA4	138.516	-0.486071	0.149002	-3.26218	0.00110559	0.010187
LOC101927914	27.3747	1.14615	0.351443	3.26126	0.00110917	0.0102142
CDON	1510.95	0.890871	0.273234	3.26047	0.00111229	0.0102255
CBLN2	589.505	1.16996	0.358804	3.26073	0.00111126	0.0102255
DNAH1	138.779	-0.578905	0.17755	-3.26051	0.0011121	0.0102255
ZNF354A	719.971	0.247646	0.0759583	3.26028	0.00111301	0.0102263
LEMD1	318.48	0.475375	0.145834	3.2597	0.0011153	0.0102415
EXOSC6	840.573	0.347011	0.10648	3.25894	0.00111829	0.0102632
HRSP12	415.592	-0.428084	0.131375	-3.2585	0.00112003	0.0102734
NPY	59.683	1.77181	0.543776	3.25834	0.00112068	0.0102735
C15orf41	519.311	0.287998	0.0883953	3.25807	0.00112174	0.0102774
PACRG	377.822	-0.50568	0.155272	-3.25675	0.00112696	0.0103195
IFI35	13.6129	-1.49036	0.457765	-3.25572	0.00113106	0.0103511
AKAP6	7023.39	0.318316	0.0978612	3.25273	0.00114304	0.0104549
WDR74	1254.89	-0.584494	0.179808	-3.25065	0.00115139	0.0105254
RNF146	2671.67	0.247582	0.0761773	3.25008	0.00115374	0.0105409
AKAP17A	1593.18	0.241781	0.0744164	3.24903	0.00115799	0.0105737
ECHDC2	47.8989	-0.951389	0.292943	-3.24769	0.00116344	0.0106056
BTBD11	891.125	-0.774885	0.238593	-3.24772	0.00116332	0.0106056
PKP4	1944.02	0.23057	0.0709897	3.24793	0.00116246	0.0106056
P3H4	1945.33	-0.462215	0.142332	-3.24745	0.00116445	0.0106088
HHIP.AS1	39.0427	-1.14307	0.352213	-3.2454	0.00117287	0.0106796
HAP1	480.869	-0.685833	0.211372	-3.24468	0.00117583	0.0107005
MICA	103.23	-1.05194	0.324304	-3.24369	0.00117991	0.0107316
LOC644919	86.3551	-0.541535	0.16696	-3.24351	0.00118066	0.0107325
LINC.PINT	243.86	-0.681249	0.210071	-3.24294	0.00118303	0.010748
ZNF528.AS1	165.805	-2.11585	0.652533	-3.24252	0.0011848	0.0107547
PLXND1	308.482	-1.49441	0.460891	-3.24244	0.00118509	0.0107547
MCTP1	127.894	-0.932966	0.287873	-3.24089	0.00119157	0.0108074
IQCC	233.066	-0.339747	0.104843	-3.24052	0.00119312	0.0108094
PROX1.AS1	12.9218	-1.83647	0.566701	-3.24064	0.00119262	0.0108094
GSTK1	527.536	-0.355636	0.109766	-3.23995	0.00119552	0.0108251
DNAAF5	778.371	-0.344486	0.106362	-3.23881	0.00120029	0.0108622
RPL4	48829.1	-0.291622	0.0901004	-3.23664	0.00120947	0.0109365
SALL1	1401.49	0.847419	0.261828	3.23655	0.00120984	0.0109365
SLC22A15	493.294	0.464845	0.143688	3.23511	0.00121598	0.0109858
TTL	3240.36	0.294498	0.0910506	3.23445	0.00121878	0.011005
RPL9	23546.7	-0.486695	0.150486	-3.23417	0.00121998	0.0110097
ZNF677	447.795	-0.441086	0.136397	-3.23384	0.00122139	0.0110163
STAU1	7236.17	0.167552	0.0518186	3.23344	0.00122307	0.0110192
RUNDC3B	2022.51	0.429456	0.132813	3.23354	0.00122266	0.0110192
SCML4	119.486	0.926205	0.286545	3.23232	0.00122791	0.0110566
C1orf109	798.19	-0.250948	0.0776448	-3.23199	0.0012293	0.0110612
VWA3A	23.7001	-1.36832	0.423404	-3.23172	0.00123047	0.0110612
MAP3K19	18.1803	-2.30067	0.711891	-3.23178	0.00123021	0.0110612
GYG2	1443.88	0.338305	0.104691	3.23146	0.00123159	0.0110652
SYT13	9582.24	0.429034	0.132795	3.2308	0.00123443	0.0110734
ASB10	24.913	-1.69663	0.525128	-3.23088	0.0012341	0.0110734
FAM110B	2005.19	0.308467	0.0954778	3.23078	0.00123455	0.0110734
ARHGEF28	54.2853	-1.17382	0.363349	-3.23057	0.00123546	0.0110754
KIF1C	1020.47	-0.404487	0.12522	-3.23022	0.00123696	0.0110828
BTG2	1833.64	-0.500745	0.15503	-3.22999	0.00123795	0.0110855
TBC1D12	1466.69	0.250802	0.0776744	3.22889	0.00124271	0.011122
PABPC4L	36.8626	-1.11677	0.345929	-3.22833	0.00124516	0.0111378
MATN2	186.45	-1.79415	0.555852	-3.22774	0.00124771	0.0111545
FOXS1	17.9544	-1.67627	0.5194	-3.22732	0.00124954	0.0111646
HAS2	250.355	-1.82929	0.56699	-3.22631	0.00125397	0.0111981
SPRY2	942.92	-0.482854	0.149682	-3.22586	0.00125593	0.0112094
POP4	854.751	-0.205839	0.0638268	-3.22497	0.00125988	0.011238
SESN1	902.422	0.214833	0.0666186	3.22482	0.00126052	0.011238
CCDC39	178.333	-0.582803	0.180779	-3.22384	0.00126485	0.0112674
STAU2	4594.12	0.309192	0.0959103	3.22376	0.00126521	0.0112674
TCEAL2	3670.63	0.390545	0.121156	3.22349	0.00126639	0.0112718
IL5RA	9.08363	-1.76004	0.546091	-3.22298	0.00126865	0.0112857
CSNK1G1	1425.76	0.300329	0.0931928	3.22267	0.00127004	0.0112919
KDM2B	3356.99	0.234971	0.0729202	3.2223	0.00127164	0.0112999
LIMS1	915.479	-0.450573	0.139859	-3.22162	0.00127468	0.0113208
WDR13	2917.55	-0.371658	0.115401	-3.22057	0.00127936	0.011356
EFCAB2	385.857	-0.5012	0.15568	-3.21943	0.00128444	0.0113949
BCL2L2	1017.45	-0.299737	0.0931247	-3.21866	0.00128791	0.0114195
ADM2	134.957	-1.01325	0.314863	-3.21806	0.00129061	0.0114372
SLC15A2	355.159	-1.38089	0.429137	-3.21783	0.00129166	0.0114402
GBAP1	123.784	-0.547853	0.170297	-3.21705	0.00129517	0.0114464
NBEAP1	35.1093	1.85496	0.576529	3.21746	0.0012933	0.0114464
RAVER1	1744.66	-0.258013	0.0801985	-3.21717	0.0012946	0.0114464
PDE1A	1434.37	-1.53618	0.477499	-3.21714	0.00129477	0.0114464
IPO8	1787.77	-0.276519	0.085959	-3.21687	0.00129598	0.0114473
MIR217HG	16.1002	1.71737	0.533918	3.21655	0.00129744	0.0114539
RPL19	16184.2	-0.281164	0.0874456	-3.2153	0.00130309	0.0114975
PPP2R2D	2336.48	0.207795	0.0646659	3.21336	0.0013119	0.011569
RWDD2B	402.704	-0.718479	0.223641	-3.21265	0.00131518	0.0115916
NFATC1	61.2077	0.82338	0.256315	3.21237	0.00131644	0.0115964
SPSB1	145.224	-0.579779	0.180522	-3.21168	0.0013196	0.0116179
NAIF1	393.649	0.272891	0.0849745	3.21145	0.00132069	0.0116212
TMEM71	10.8503	-2.24347	0.698666	-3.21108	0.00132235	0.0116295
CPSF4	882.8	-0.299584	0.0933064	-3.21076	0.00132387	0.0116365
LINC01314	115.426	-0.792906	0.247003	-3.21011	0.00132685	0.0116503
MBOAT1	30.9562	-1.17168	0.364998	-3.2101	0.00132687	0.0116503
CHST1	1163.2	0.568039	0.177003	3.2092	0.00133105	0.0116795
PCID2	943.519	-0.233787	0.0728519	-3.20907	0.00133164	0.0116795
GBGT1	14.1617	-1.16198	0.362225	-3.2079	0.00133709	0.011721
RAMP2	213.717	-0.485726	0.15144	-3.20738	0.00133949	0.0117357
UBE2D1	1846.16	0.260256	0.0811711	3.20627	0.00134469	0.0117685
ICA1	405.048	0.311366	0.0971103	3.20631	0.00134447	0.0117685
EMBP1	50.0794	0.746987	0.233108	3.20446	0.00135315	0.0118362
FGF7	47.4974	-0.986255	0.307809	-3.20411	0.00135479	0.0118426
RPL10	28941.4	-0.350486	0.10939	-3.204	0.00135534	0.0118426
RNF2	2160.03	0.248875	0.0777072	3.20273	0.00136133	0.0118741
BCL7C	404.579	0.484992	0.151425	3.20286	0.0013607	0.0118741
ZBBX	180.222	-0.577761	0.180403	-3.20261	0.00136187	0.0118741
PODXL	1092.84	-0.626671	0.195657	-3.20291	0.00136045	0.0118741
GPR158	257.561	-0.394559	0.123208	-3.20238	0.00136299	0.0118775
COL16A1	75.1171	-0.973806	0.304175	-3.20147	0.00136731	0.0119087
MAP3K8	60.9387	0.804724	0.2514	3.20098	0.00136963	0.0119225
KCNT2	426.324	-0.476296	0.148823	-3.20041	0.00137232	0.0119331
EIF2D	649.521	-0.424553	0.132654	-3.20045	0.00137211	0.0119331
MANBA	1179.33	-0.274853	0.0858866	-3.20019	0.00137338	0.011936
RPL29	16534	-0.392691	0.122717	-3.19997	0.00137442	0.0119386
LOC101928075	40.8038	0.814253	0.25448	3.19967	0.00137585	0.0119447
BSX	53.2556	1.56321	0.488686	3.19881	0.00137996	0.0119739
AFAP1	6271.18	0.300495	0.0939516	3.1984	0.00138191	0.0119844
KLF14	30.4689	-1.76938	0.55334	-3.19764	0.00138558	0.0120099
MMAB	1154.62	-0.295938	0.092583	-3.19647	0.00139122	0.0120523
SLCO4A1	138.246	-0.44934	0.140597	-3.19594	0.00139375	0.0120677
ITM2B	7986.53	-0.205025	0.0641992	-3.19357	0.00140524	0.0121608
FADS1	8167.47	-0.267727	0.08386	-3.19254	0.00141026	0.0121977
ZNF571.AS1	412.727	-1.90194	0.595838	-3.19204	0.00141273	0.0122126
COL13A1	110.885	-0.926559	0.290342	-3.19127	0.0014165	0.0122386
HLA.E	476.569	-0.560926	0.175836	-3.19006	0.00142242	0.0122832
LRRC34	175.873	-0.512586	0.160708	-3.18956	0.0014249	0.0122981
GPR19	789.498	-0.272742	0.0855383	-3.18853	0.00142997	0.0123353
DCAF6	1218.65	0.392842	0.123217	3.18821	0.00143159	0.0123361
GPR101	131.016	-0.91386	0.286636	-3.18822	0.00143151	0.0123361
ZNF630	206.907	-0.383597	0.12039	-3.18628	0.00144116	0.0124121
KCNK2	743.799	-0.447106	0.14033	-3.1861	0.00144206	0.0124131
ABHD6	718.275	0.432239	0.135674	3.18587	0.0014432	0.0124165
RPS15	12903.9	-0.357164	0.112126	-3.18539	0.0014456	0.0124305
RPH3AL	93.539	-0.610624	0.191706	-3.18521	0.00144647	0.0124314
TMEM45A	616.042	-0.500632	0.157192	-3.18484	0.00144836	0.012441
LHX8	10480.8	-1.30687	0.410476	-3.1838	0.00145356	0.0124791
CEPT1	870.283	-0.322131	0.101214	-3.18267	0.00145921	0.012521
CILP	20.3719	-1.06928	0.336056	-3.18187	0.00146328	0.0125493
TOMM70A	6386.82	0.208869	0.0656541	3.18135	0.00146588	0.0125649
PKI55	2009.77	0.373202	0.117319	3.1811	0.00146718	0.0125694
GDAP1	4857.67	0.281661	0.0885553	3.18062	0.00146958	0.0125834
DYRK4	541.398	-0.45996	0.144625	-3.18036	0.00147094	0.0125884
DYNC1LI1	5104.94	0.238615	0.0750605	3.17897	0.00147798	0.0126419
QSOX2	1306.46	-0.347129	0.109225	-3.17811	0.00148239	0.0126729
HTR4	50.9723	-1.15437	0.363268	-3.17774	0.00148427	0.0126824
NPPA	23.7363	-1.56953	0.493988	-3.17725	0.00148677	0.0126906
LSM14B	5583.71	0.202304	0.0636729	3.17725	0.00148681	0.0126906
NFE2L3	185.981	0.492303	0.154969	3.17678	0.00148918	0.0127043
SFXN3	2261.07	0.372483	0.117264	3.17644	0.00149094	0.0127125
DTD2	1113.76	0.321681	0.101298	3.17558	0.00149539	0.0127438
TBC1D22A	694.322	0.193627	0.0609778	3.17537	0.00149645	0.0127462
ZNF629	4672.65	0.198467	0.0625112	3.1749	0.00149887	0.0127513
NCALD	3336.68	0.765232	0.241034	3.1748	0.00149942	0.0127513
C9orf24	125.327	-0.84197	0.2652	-3.17485	0.00149912	0.0127513
FHL3	167.433	0.525819	0.165636	3.17455	0.0015007	0.0127555
MBNL2	579.195	-0.481228	0.151643	-3.17344	0.00150646	0.0127911
LINC00235	18.0126	-1.07121	0.337555	-3.17345	0.00150636	0.0127911
NOXA1	52.4058	-0.69357	0.218603	-3.17274	0.00151008	0.0128151
ST8SIA2	10012.9	0.351531	0.110818	3.17214	0.00151323	0.0128351
KIF26B	736.314	0.668867	0.210899	3.1715	0.00151651	0.0128563
PPM1H	836.126	0.347773	0.109669	3.1711	0.00151864	0.0128676
MORC4	282.671	-0.638882	0.2015	-3.17062	0.00152114	0.012882
CARS	4268.97	-0.239879	0.0756838	-3.16949	0.00152708	0.0129121
ZNF331	1162.98	-0.320121	0.100992	-3.16975	0.00152569	0.0129121
DNAAF3	121.604	-0.751322	0.237042	-3.16956	0.00152667	0.0129121
LOC100505715	234.581	-0.370938	0.117043	-3.16926	0.0015283	0.0129157
ADCK3	790.226	-0.542971	0.171441	-3.1671	0.00153965	0.012998
PTPMT1	468.17	-0.437859	0.138254	-3.16706	0.00153988	0.012998
SUDS3	2625.21	0.187821	0.0593066	3.16696	0.00154044	0.012998
ACOT11	11.2551	-1.47989	0.467355	-3.16652	0.00154273	0.0130106
SEMA3E	2201.38	-1.69051	0.533896	-3.16637	0.00154356	0.0130108
AGAP4	154.865	-0.463948	0.146539	-3.16603	0.00154534	0.0130149
PSME4	2965	-0.421644	0.13318	-3.16597	0.00154565	0.0130149
ZFYVE1	1759.28	0.166413	0.0525694	3.16558	0.00154774	0.0130229
MYO1C	418.961	0.441895	0.139609	3.16524	0.00154953	0.0130229
GDF15	247.059	-2.2488	0.710474	-3.16522	0.00154968	0.0130229
GAP43	30076.5	0.65433	0.206727	3.16519	0.00154981	0.0130229
CNTNAP3	262.032	0.572619	0.180927	3.16492	0.00155123	0.0130281
RPS11	30431	-0.363483	0.114894	-3.16364	0.00155811	0.0130791
YTHDC2	1793.87	0.314417	0.099408	3.1629	0.00156208	0.0131057
SPIN1	10428.9	0.270496	0.0855332	3.16247	0.00156434	0.0131179
RRAS	77.1699	-0.840394	0.265755	-3.16229	0.00156536	0.0131196
SST	2384.27	-2.24872	0.711386	-3.16104	0.00157208	0.0131691
IL15	17.8599	-1.28943	0.408197	-3.15884	0.00158397	0.0132619
NAP1L4	8778.41	0.191294	0.0605755	3.15794	0.0015889	0.0132963
ACSS1	806.938	-1.57835	0.499837	-3.15773	0.00159004	0.013299
ZC2HC1A	3478.57	0.343344	0.108749	3.15721	0.00159286	0.0133157
OSTC	1324.2	-0.29461	0.0933213	-3.15694	0.00159435	0.0133186
ARHGAP36	248.013	-0.891471	0.282393	-3.15685	0.00159485	0.0133186
TRIM7	79.4489	0.523392	0.165874	3.15536	0.00160302	0.01338
TTC6	26.963	-4.09955	1.2994	-3.15496	0.00160521	0.0133913
C16orf89	6.75829	-2.14371	0.679529	-3.1547	0.00160666	0.0133917
MFNG	150.439	-0.758873	0.240557	-3.15465	0.0016069	0.0133917
C1orf61	3949.99	-0.716796	0.227358	-3.15271	0.0016176	0.0134739
KLHL25	2005.86	0.351583	0.111528	3.15242	0.00161923	0.0134803
RBM47	11.0387	-1.91747	0.608281	-3.15228	0.00162003	0.0134803
ZDHHC4	1387.47	-0.189174	0.060034	-3.15112	0.00162645	0.0135268
RNASEL	245.588	-0.595467	0.189007	-3.1505	0.00162993	0.0135481
UTP18	1781.23	-0.241189	0.0765591	-3.15036	0.00163069	0.0135481
HTT	4157.96	-0.192837	0.0612279	-3.14949	0.00163553	0.0135814
CALU	5633.63	-0.489733	0.155618	-3.14702	0.00164943	0.0136899
GSTO2	104.672	-0.569076	0.180867	-3.14638	0.00165303	0.0137127
SEC24D	1397.25	-0.45961	0.146091	-3.14606	0.00165488	0.0137211
FBXO45	2591.86	0.233433	0.0742144	3.14539	0.00165867	0.0137455
SRPK2	6752.07	0.18262	0.0580687	3.14489	0.00166148	0.0137617
KLHL18	1933.03	0.302192	0.0961066	3.14434	0.00166461	0.0137806
PANX1	3559.18	0.251793	0.0800869	3.144	0.00166657	0.0137898
TRAPPC2B	102.619	-0.507986	0.161665	-3.14221	0.00167678	0.0138586
UBE2QL1	2223.29	0.409049	0.130173	3.14234	0.00167605	0.0138586
UAP1L1	120.159	-1.19452	0.380166	-3.14209	0.00167745	0.0138586
FAM219A	6376.56	0.299584	0.0954417	3.13892	0.00169572	0.0139966
RPL12	11473	-0.343585	0.10946	-3.13889	0.00169588	0.0139966
STK38L	998.906	-0.276352	0.0880546	-3.13842	0.00169861	0.014012
SLC39A14	875.596	-0.341794	0.10898	-3.13628	0.00171103	0.0141073
CCDC152	100.736	-3.16222	1.00839	-3.13592	0.00171317	0.0141177
MX1	62.352	-0.84091	0.268179	-3.13562	0.00171489	0.0141248
GPM6A	33519.8	0.403111	0.12858	3.13509	0.00171802	0.0141434
TRIM66	848.391	-0.40492	0.12918	-3.13454	0.00172125	0.0141627
HIF1AN	2000.17	0.200146	0.0638598	3.13414	0.00172358	0.0141747
AP4B1	390.477	0.22496	0.0718451	3.13119	0.00174102	0.0143109
LOC100287592	68.3271	1.18773	0.37938	3.13071	0.00174387	0.0143271
CXADR	11079.1	0.342952	0.109551	3.13053	0.00174489	0.0143282
ATF3	757.418	-0.719333	0.229799	-3.13027	0.00174646	0.0143338
PAK7	3958.49	0.306346	0.0978796	3.12983	0.0017491	0.0143482
LINC00294	624.108	0.266876	0.0852747	3.12961	0.00175039	0.0143516
LINC00869	490.895	0.376394	0.120276	3.12943	0.00175146	0.0143531
PABPC1L2B	167.203	0.55399	0.177114	3.12788	0.00176071	0.0144217
CCDC184	6965.05	0.384504	0.122955	3.1272	0.0017648	0.0144479
CTNND2	10781.8	0.358847	0.114769	3.12668	0.0017679	0.014466
CHAMP1	2386.3	0.245846	0.0786371	3.12634	0.00176997	0.0144683
C2CD2	362.95	0.406638	0.130067	3.12638	0.00176973	0.0144683
DUSP12	1171.74	0.184896	0.0591516	3.12579	0.00177325	0.0144832
GINM1	1087.4	-0.275086	0.0880067	-3.12574	0.00177358	0.0144832
RBPMS	112.271	-0.76562	0.245	-3.12498	0.00177814	0.0145132
DRG2	858.37	-0.320448	0.102565	-3.12432	0.00178215	0.0145385
ABALON	207.472	0.525473	0.168229	3.12357	0.00178674	0.0145687
AES	21096.2	-0.407337	0.130477	-3.12191	0.00179683	0.0146436
BIRC3	9.12096	-1.81718	0.582111	-3.12171	0.00179802	0.0146459
LOC100505530	11.4124	1.49965	0.480417	3.12156	0.00179896	0.0146462
LOC646762	872.243	0.264227	0.0846565	3.12116	0.0018014	0.0146587
LINC00847	508.034	-0.361601	0.115904	-3.11983	0.00180955	0.0147177
ZBTB16	267.293	-0.690957	0.221643	-3.11743	0.00182435	0.0148306
TMEM216	275.264	-0.323895	0.103915	-3.11692	0.00182754	0.0148491
COL4A2	3543.95	-0.375292	0.120424	-3.11642	0.00183059	0.014859
ZMIZ2	4859.12	0.381644	0.122458	3.11654	0.0018299	0.014859
[truncated: 14,234 more rows]

## Sheet: Day 100 Ventral
	baseMean	log2FoldChange	lfcSE	stat	pvalue	padj
FABP7	8026.03	1.24712	0.0752076	16.5824	9.34e-62	1.53e-57
CHL1	8886.89	-2.92722	0.188433	-15.5345	2.03e-54	1.66e-50
MEST	13942.2	-1.2788	0.0963744	-13.2691	3.5e-40	1.91e-36
RPE65	539.92	-1.66462	0.126493	-13.1598	1.5e-39	6.12e-36
DDR2	191.546	-2.41637	0.184817	-13.0744	4.61e-39	1.51e-35
CALCRL	253.785	-2.37533	0.188167	-12.6235	1.57e-36	4.28e-33
TSPAN5	4146.99	0.588639	0.0484753	12.1431	6.24e-34	1.46e-30
CPS1	245.395	-1.76033	0.145737	-12.0788	1.37e-33	2.8e-30
SLFN11	178.505	-3.97892	0.342737	-11.6092	3.7e-31	6.73e-28
LOC100288778	419.722	-1.30659	0.11389	-11.4723	1.82e-30	2.97e-27
COL8A1	878.785	-5.58496	0.4928	-11.3331	8.99e-30	1.34e-26
GALNT15	590.667	-2.40512	0.214471	-11.2142	3.47e-29	4.74e-26
TBR1	116.569	6.28412	0.561853	11.1846	4.85e-29	6.11e-26
PCDHGB4	1975.01	-1.45696	0.130599	-11.156	6.69e-29	7.82e-26
PCDHGB7	1213.03	-1.58151	0.141919	-11.1437	7.68e-29	8.38e-26
FOLH1	101.248	-7.83901	0.706001	-11.1034	1.21e-28	1.24e-25
ADAMTSL1	346.498	-2.82643	0.257215	-10.9886	4.34e-28	4.18e-25
RRBP1	1429.08	-0.805916	0.0739887	-10.8924	1.25e-27	1.14e-24
CAV2	176.878	-2.35065	0.219209	-10.7233	7.91e-27	6.81e-24
CORIN	92.6494	-3.67797	0.347504	-10.584	3.54e-26	2.89e-23
NTN1	14640	-1.53806	0.146993	-10.4635	1.27e-25	9.91e-23
FRZB	3156.89	-4.31595	0.414592	-10.4101	2.23e-25	1.66e-22
COL4A1	1494.96	-2.21223	0.213629	-10.3555	3.95e-25	2.81e-22
BCL6	660.139	-1.33525	0.129189	-10.3356	4.86e-25	3.28e-22
ANGPTL2	870.905	-1.77346	0.171633	-10.3329	5e-25	3.28e-22
ERV3.1	234.529	-1.83558	0.177906	-10.3177	5.86e-25	3.69e-22
IRAK1	564.093	-1.41304	0.137079	-10.3082	6.47e-25	3.92e-22
PEG3	6001.09	-6.28824	0.61423	-10.2376	1.35e-24	7.86e-22
C3orf58	2304.8	-1.64337	0.16058	-10.2339	1.4e-24	7.89e-22
EDNRA	60.8292	-3.23974	0.317476	-10.2047	1.89e-24	1.03e-21
PAM	16641.6	-1.39958	0.137203	-10.2008	1.97e-24	1.04e-21
BHLHE40	1611.6	-2.01066	0.19852	-10.1282	4.14e-24	2.12e-21
RXRA	1576.3	-0.969187	0.0962181	-10.0728	7.29e-24	3.61e-21
ELK3	494.567	-1.90946	0.191321	-9.98042	1.86e-23	8.94e-21
TMBIM1	136.817	-2.03341	0.20641	-9.85134	6.76e-23	3.16e-20
FN1	1131.14	-2.07095	0.210524	-9.83713	7.79e-23	3.54e-20
NUP93	5304.03	0.540035	0.0557989	9.67823	3.73e-22	1.65e-19
ID3	257.667	-3.20394	0.3314	-9.66788	4.13e-22	1.78e-19
CHST6	708.644	-1.83925	0.190412	-9.65933	4.49e-22	1.88e-19
SPARCL1	56479.3	-3.72626	0.387349	-9.61991	6.59e-22	2.7e-19
B3GNT9	155.128	-1.93514	0.202045	-9.5778	9.91e-22	3.96e-19
CTNNA3	150.349	-1.75646	0.184139	-9.53877	1.45e-21	5.63e-19
TGFBR3	128.046	-2.66705	0.28004	-9.52383	1.67e-21	6.35e-19
CBLN4	54.0244	18.6107	1.96263	9.48255	2.48e-21	9.23e-19
GRM3	1644.95	1.57124	0.166544	9.43441	3.93e-21	1.43e-18
BZW2	3321	0.593669	0.0630053	9.42252	4.4e-21	1.57e-18
MTM1	715.542	-0.899666	0.095595	-9.41122	4.9e-21	1.71e-18
FAM53B	2300.9	-0.835673	0.0895293	-9.33408	1.02e-20	3.47e-18
FAM135B	360.177	-7.52242	0.808344	-9.30597	1.33e-20	4.43e-18
DCHS2	1492.11	-1.57177	0.169518	-9.27198	1.83e-20	5.98e-18
AGPAT2	221.797	-1.49538	0.161555	-9.25613	2.12e-20	6.8e-18
FRMPD3	1036	-1.25439	0.13566	-9.24657	2.32e-20	7.3e-18
IQGAP2	2555.19	-1.13424	0.123189	-9.20732	3.34e-20	1.03e-17
ASTN2	1875.05	-1.36616	0.148574	-9.1952	3.74e-20	1.13e-17
KCNE4	80.703	-3.23754	0.356924	-9.07069	1.18e-19	3.52e-17
ACSS3	511.843	-1.77902	0.196447	-9.05595	1.35e-19	3.88e-17
FREM2	973.709	-1.36377	0.150624	-9.05417	1.38e-19	3.88e-17
PERP	536.567	-1.82638	0.201658	-9.05682	1.34e-19	3.88e-17
HSPB6	67.2741	-2.64031	0.292152	-9.03748	1.6e-19	4.45e-17
VAV3	169.315	1.67658	0.186225	9.00301	2.2e-19	5.99e-17
PROS1	647.14	-1.62419	0.180501	-8.99828	2.29e-19	6.15e-17
AQP4	11449.4	-2.30143	0.257378	-8.94186	3.83e-19	1.01e-16
EFNA5	2434.53	-1.20584	0.135032	-8.92997	4.26e-19	1.11e-16
KCNJ8	125.516	-1.5321	0.171621	-8.9272	4.37e-19	1.12e-16
SPARC	22342.6	-1.59546	0.178918	-8.91726	4.78e-19	1.2e-16
KCNA1	182.442	2.73913	0.307251	8.91496	4.88e-19	1.21e-16
PLSCR4	306.048	-2.08566	0.234524	-8.89318	5.94e-19	1.45e-16
DACH1	1350.16	1.58781	0.179086	8.8662	7.57e-19	1.82e-16
TRIM9	5138.3	-0.67507	0.0765158	-8.82262	1.12e-18	2.65e-16
COL4A2	2945.21	-1.13385	0.128658	-8.81291	1.22e-18	2.85e-16
LAPTM4A	4696.94	-0.699211	0.0794381	-8.80196	1.34e-18	3.1e-16
B4GALT1	267.67	-1.30394	0.148174	-8.80004	1.37e-18	3.11e-16
EFCAB2	372.261	-1.02882	0.117145	-8.78243	1.6e-18	3.59e-16
SPON1	15408.5	-2.07372	0.237143	-8.74459	2.24e-18	4.92e-16
TMEM47	6766.9	-1.339	0.153137	-8.74377	2.25e-18	4.92e-16
CD24	27484.1	0.603584	0.0690525	8.74094	2.31e-18	4.98e-16
PLCD3	828.603	-1.17701	0.134694	-8.73836	2.37e-18	5.03e-16
ADM	952.593	-3.50073	0.401333	-8.72276	2.71e-18	5.62e-16
ENOX1	949.332	0.937137	0.107419	8.72413	2.68e-18	5.62e-16
FREM1	100.408	-2.2043	0.253024	-8.71184	2.99e-18	6.12e-16
PRELP	635.704	-3.80814	0.437655	-8.70124	3.28e-18	6.63e-16
CTSC	382.725	-1.34229	0.154618	-8.68132	3.91e-18	7.81e-16
TIPARP	1586.04	-0.897693	0.10343	-8.67924	3.98e-18	7.86e-16
TLN1	2276.69	-0.963163	0.111118	-8.66794	4.4e-18	8.57e-16
ETNPPL	331.11	-5.9417	0.686088	-8.66027	4.71e-18	9.06e-16
LGR4	2373.03	-1.33168	0.154585	-8.61455	7.02e-18	1.34e-15
MTMR10	426.768	-1.59508	0.185663	-8.59129	8.6e-18	1.6e-15
JAM2	4313.27	-1.97041	0.229355	-8.5911	8.61e-18	1.6e-15
AHNAK	1935.45	-2.47275	0.288034	-8.58492	9.09e-18	1.67e-15
ITGB4	149.368	-3.90335	0.457898	-8.5245	1.53e-17	2.79e-15
WASF2	3196.27	-1.0813	0.127526	-8.479	2.27e-17	4.09e-15
SLIT2	9259.65	-1.88312	0.222271	-8.47218	2.41e-17	4.28e-15
CHST15	1024.13	-2.06634	0.244134	-8.46396	2.58e-17	4.55e-15
PGF	95.8304	-2.11001	0.249603	-8.45349	2.83e-17	4.92e-15
CCDC80	501.307	-2.02675	0.239864	-8.44959	2.92e-17	5.04e-15
TRIM6	51.7639	-2.4413	0.290348	-8.40819	4.16e-17	7.1e-15
FHOD3	2460.22	0.523514	0.0623794	8.39241	4.76e-17	8.04e-15
RUNX1T1	5886.41	1.15137	0.137391	8.38025	5.28e-17	8.82e-15
PAPSS2	197.411	-2.75129	0.329285	-8.35536	6.52e-17	1.08e-14
GPNMB	1144.45	-3.94918	0.472752	-8.3536	6.62e-17	1.08e-14
LRRC3	1063.6	-0.727724	0.087458	-8.32084	8.73e-17	1.42e-14
SIX6	186.57	-7.09227	0.853745	-8.30725	9.79e-17	1.57e-14
ARSJ	33.7715	-3.20214	0.386516	-8.28461	1.18e-16	1.88e-14
MLEC	7781.48	-0.726213	0.0876889	-8.28169	1.21e-16	1.9e-14
AEBP1	1485.57	-1.47791	0.178466	-8.2812	1.22e-16	1.9e-14
GRIN2A	942.775	-1.74103	0.210796	-8.25931	1.47e-16	2.26e-14
SLC39A8	195.312	-1.45072	0.175696	-8.25701	1.49e-16	2.28e-14
NAP1L6	27.1729	-3.85234	0.467761	-8.23571	1.79e-16	2.71e-14
DYRK4	579.144	-0.952279	0.115743	-8.22751	1.91e-16	2.87e-14
FRAS1	842.637	0.800404	0.0976571	8.19607	2.48e-16	3.7e-14
FAM19A2	1287.52	0.836412	0.102111	8.1912	2.59e-16	3.78e-14
TMEM64	880.472	-0.695263	0.0848776	-8.19136	2.58e-16	3.78e-14
CDKN2B	150.204	-2.76024	0.337051	-8.18938	2.63e-16	3.8e-14
IQGAP1	2432.69	-1.17961	0.144271	-8.17634	2.93e-16	4.2e-14
LINC01088	57.0385	-3.54395	0.43485	-8.14982	3.64e-16	5.19e-14
CREB3L2	635.909	-0.895712	0.110937	-8.07404	6.8e-16	9.6e-14
LGR5	140.027	-4.11999	0.51081	-8.0656	7.29e-16	1.01e-13
FOXJ1	263.285	-2.25348	0.279378	-8.06606	7.26e-16	1.01e-13
PLOD1	2524.62	-1.08074	0.134232	-8.05122	8.2e-16	1.13e-13
SULF1	5139.79	-2.68763	0.334939	-8.02423	1.02e-15	1.39e-13
SCARB1	805.547	-0.647396	0.0807576	-8.01653	1.09e-15	1.47e-13
ACTG2	17.8357	-4.58638	0.572499	-8.01115	1.14e-15	1.52e-13
TSSC2	343.536	0.857464	0.107288	7.99217	1.33e-15	1.74e-13
B3GAT2	155.178	-1.48518	0.18582	-7.99256	1.32e-15	1.74e-13
IGSF1	1490.63	-1.2738	0.159355	-7.99348	1.31e-15	1.74e-13
TRPM8	115.761	-1.71611	0.215151	-7.97633	1.51e-15	1.96e-13
VAMP5	46.3851	-2.69257	0.337958	-7.96716	1.62e-15	2.09e-13
SP140L	48.3141	-4.44461	0.559668	-7.94152	2e-15	2.55e-13
COL22A1	168.48	-5.43698	0.685874	-7.92709	2.24e-15	2.85e-13
STAT3	4973.62	-0.579778	0.0731746	-7.92321	2.31e-15	2.91e-13
TFE3	2377.72	-0.781948	0.0987365	-7.91954	2.38e-15	2.98e-13
CELSR1	1729.26	-1.40273	0.177185	-7.91673	2.44e-15	3.02e-13
TMEM176B	91.2261	-3.14814	0.398492	-7.90012	2.79e-15	3.43e-13
TANC1	814.143	-1.51998	0.192731	-7.88655	3.11e-15	3.79e-13
CALN1	1486.98	0.975831	0.123792	7.88285	3.2e-15	3.85e-13
SLC6A8	4288.76	-0.714001	0.0905661	-7.88376	3.18e-15	3.85e-13
DNASE2	823.053	-1.2577	0.16085	-7.81911	5.32e-15	6.36e-13
ZFP36L2	1655.16	-0.982314	0.126073	-7.7916	6.62e-15	7.85e-13
CTDSP1	413.051	-0.995038	0.127953	-7.7766	7.45e-15	8.77e-13
NMBR	117.504	3.28511	0.422502	7.77538	7.52e-15	8.79e-13
YAP1	2704.16	-1.021	0.131624	-7.75695	8.7e-15	1.01e-12
NAV1	9023.4	0.814667	0.105097	7.75159	9.08e-15	1.03e-12
MMP28	232.849	-1.90798	0.246101	-7.75284	8.99e-15	1.03e-12
ICAM1	48.0717	-2.81026	0.362532	-7.75176	9.06e-15	1.03e-12
SYNPR	2789.35	1.6784	0.216614	7.74833	9.31e-15	1.05e-12
FAM46C	71.898	-2.22081	0.286685	-7.7465	9.45e-15	1.06e-12
FGFRL1	1020.25	-1.01205	0.130653	-7.74606	9.48e-15	1.06e-12
MAGT1	2407.69	-1.14705	0.148154	-7.74224	9.77e-15	1.08e-12
NFATC4	600.665	-1.14397	0.147944	-7.73242	1.06e-14	1.16e-12
PDLIM5	4577.4	-1.349	0.1746	-7.72623	1.11e-14	1.21e-12
HLA.E	1397.79	-1.45154	0.188013	-7.7204	1.16e-14	1.26e-12
NPC2	645.518	-1.52088	0.197151	-7.7143	1.22e-14	1.31e-12
DDX11L2	48.25	4.55514	0.590997	7.70755	1.28e-14	1.37e-12
NPY5R	91.5208	1.89757	0.246348	7.70284	1.33e-14	1.41e-12
OBSL1	5630.62	-0.964985	0.125631	-7.68111	1.58e-14	1.67e-12
SNTG1	583.429	0.793987	0.103586	7.66497	1.79e-14	1.88e-12
ITGA5	191.036	-1.41279	0.184435	-7.66006	1.86e-14	1.94e-12
MMP14	3559.45	-1.64306	0.214778	-7.65006	2.01e-14	2.08e-12
VEGFA	13095.2	-1.0683	0.139685	-7.64788	2.04e-14	2.1e-12
HLA.A	3122.05	-1.58308	0.207135	-7.64274	2.13e-14	2.18e-12
VAMP3	1306.84	-1.0772	0.141512	-7.61206	2.7e-14	2.74e-12
MRAS	3142.05	0.558958	0.0735424	7.60048	2.95e-14	2.98e-12
APLN	359.761	-2.02922	0.267222	-7.59377	3.11e-14	3.12e-12
KCNJ10	439.849	1.35995	0.179148	7.5912	3.17e-14	3.16e-12
ZNRF1	3074.87	0.503814	0.0663959	7.58804	3.25e-14	3.22e-12
NOL4L	4499.98	0.495645	0.0653664	7.58257	3.39e-14	3.34e-12
RETSAT	862.059	-0.756515	0.0998454	-7.57686	3.54e-14	3.47e-12
PAMR1	88.1636	-2.91297	0.384824	-7.5696	3.74e-14	3.65e-12
ANTXR2	467.399	-1.14446	0.151448	-7.55673	4.13e-14	4e-12
IGFBP3	208.765	-1.45914	0.193184	-7.55312	4.25e-14	4.09e-12
GPX8	497.362	-1.45439	0.192722	-7.54656	4.47e-14	4.28e-12
SORCS3	2574.85	-1.26736	0.168003	-7.54367	4.57e-14	4.35e-12
KIF13B	904.618	-0.841465	0.112004	-7.51282	5.79e-14	5.47e-12
UBE2QL1	3290.77	0.582733	0.077574	7.51196	5.82e-14	5.48e-12
C10orf54	52.3151	-2.79039	0.371656	-7.508	6e-14	5.58e-12
B2M	3249.18	-1.1724	0.156147	-7.50833	5.99e-14	5.58e-12
PCGF5	2217.71	-1.06897	0.142844	-7.48346	7.24e-14	6.69e-12
PLTP	2495.28	-1.62437	0.217584	-7.46545	8.3e-14	7.63e-12
CASC9	52.3582	-1.64316	0.220221	-7.46138	8.56e-14	7.83e-12
NDUFA4L2	1622.1	-2.72395	0.365352	-7.4557	8.94e-14	8.13e-12
FAM129B	1238.38	-0.693634	0.0932782	-7.43618	1.04e-13	9.37e-12
UGGT2	621.269	-0.820477	0.110422	-7.43037	1.08e-13	9.74e-12
SHH	1599.79	-3.626	0.488553	-7.4219	1.15e-13	1.03e-11
SEMA3D	204.513	-2.3459	0.316189	-7.4193	1.18e-13	1.05e-11
ITGB1	6544.98	-0.7871	0.1061	-7.41846	1.18e-13	1.05e-11
HSPA1A	760.201	-3.01279	0.407082	-7.40093	1.35e-13	1.19e-11
HES1	1054.33	-1.16572	0.15764	-7.39482	1.42e-13	1.24e-11
TAC1	885.888	1.74099	0.235835	7.38223	1.56e-13	1.36e-11
FLJ16779	873.37	-1.73159	0.234699	-7.37791	1.61e-13	1.39e-11
HLA.DPA1	18.7622	-3.82874	0.519652	-7.36788	1.73e-13	1.49e-11
ISLR	497.126	-3.8668	0.525869	-7.35315	1.94e-13	1.66e-11
STEAP3	88.4221	-1.87338	0.254986	-7.34699	2.03e-13	1.73e-11
SEC24D	1408.26	-0.914689	0.12467	-7.33686	2.19e-13	1.85e-11
C1QL2	291.363	-1.91127	0.260953	-7.32419	2.4e-13	2.03e-11
GFAP	1370.56	-3.87647	0.529633	-7.31917	2.5e-13	2.08e-11
CD36	713.023	-3.10126	0.423698	-7.31951	2.49e-13	2.08e-11
PCDH11X	3076.87	1.39531	0.190972	7.30638	2.74e-13	2.28e-11
PI15	2590.3	-4.25126	0.582716	-7.2956	2.97e-13	2.46e-11
DENND5B	6021.14	0.633802	0.0869324	7.29074	3.08e-13	2.52e-11
FHDC1	691.099	0.912691	0.125181	7.29097	3.08e-13	2.52e-11
CHST9	472.616	-1.33887	0.183763	-7.28585	3.2e-13	2.6e-11
PI16	416.57	-5.45302	0.749081	-7.27962	3.35e-13	2.71e-11
NPTX2	2252.97	-3.16138	0.434359	-7.27826	3.38e-13	2.73e-11
DMD	1659.15	-1.1495	0.158064	-7.27236	3.53e-13	2.83e-11
FAM182B	258.377	-0.866404	0.119149	-7.27162	3.55e-13	2.84e-11
PLOD2	4640.84	-1.4661	0.201667	-7.26987	3.6e-13	2.85e-11
COL21A1	72.7504	-3.71699	0.511284	-7.26992	3.6e-13	2.85e-11
STIM2	1421.29	0.558026	0.0768617	7.26013	3.87e-13	3.04e-11
DSP	144.58	-4.51052	0.621464	-7.2579	3.93e-13	3.08e-11
BAG3	684.446	-1.25969	0.174204	-7.23113	4.79e-13	3.73e-11
LOC403323	24.9218	-5.23568	0.724285	-7.22875	4.87e-13	3.78e-11
RGS8	447.457	0.802334	0.111002	7.2281	4.9e-13	3.78e-11
LOXL3	386.837	-0.812194	0.112428	-7.22412	5.04e-13	3.87e-11
MLC1	4478.72	-1.31764	0.182424	-7.22298	5.09e-13	3.87e-11
PTPN13	2053.81	-0.813018	0.112559	-7.22304	5.08e-13	3.87e-11
SLC35F1	6684.2	0.680159	0.0944629	7.20028	6.01e-13	4.55e-11
CDH1	673.809	-3.90827	0.542922	-7.19858	6.08e-13	4.59e-11
AK7	235.866	-2.15596	0.299599	-7.19617	6.19e-13	4.64e-11
THOC7	1054.8	0.66188	0.0919798	7.19594	6.2e-13	4.64e-11
CDK5R1	14173.9	0.515396	0.0717074	7.18749	6.6e-13	4.91e-11
TCEAL6	428.212	-2.25044	0.31326	-7.18391	6.77e-13	5.02e-11
UNC119B	3212.24	-0.625685	0.0871129	-7.18247	6.85e-13	5.05e-11
CTGF	119.104	-1.83025	0.254954	-7.17876	7.03e-13	5.16e-11
CDH12	489.101	1.08948	0.151921	7.17135	7.43e-13	5.43e-11
FHL1	10903	-0.449933	0.0627476	-7.17051	7.47e-13	5.44e-11
EFEMP1	1374.47	-1.4202	0.198162	-7.16685	7.67e-13	5.56e-11
GGT5	40.0052	-5.99019	0.836319	-7.16256	7.92e-13	5.71e-11
LINC00909	790.183	0.704239	0.0983737	7.15881	8.14e-13	5.84e-11
BMP1	661.604	-1.10301	0.154105	-7.15757	8.21e-13	5.87e-11
DHRS3	397.092	-1.78161	0.249226	-7.14856	8.77e-13	6.24e-11
MPPED2	4023.42	1.36318	0.190836	7.14319	9.12e-13	6.41e-11
CD109	223.334	-2.95846	0.414156	-7.14334	9.11e-13	6.41e-11
SLC25A53	315.702	-0.91353	0.127887	-7.14327	9.11e-13	6.41e-11
PDE10A	3402.21	1.59139	0.222813	7.14226	9.18e-13	6.42e-11
MYOF	2341.49	-3.94778	0.553103	-7.13752	9.5e-13	6.62e-11
GLIS3	1079.58	-1.81898	0.255189	-7.12799	1.02e-12	7.06e-11
ANXA1	644.213	-3.09347	0.434853	-7.11384	1.13e-12	7.79e-11
PCDH18	984.529	-1.4931	0.210149	-7.10497	1.2e-12	8.28e-11
KCNMB1	22.7431	-3.58297	0.505028	-7.09459	1.3e-12	8.88e-11
AGT	1118.1	-4.03847	0.571001	-7.07261	1.52e-12	1.04e-10
SERPINH1	2794.9	-1.4611	0.206831	-7.0642	1.62e-12	1.1e-10
NR2F1	4724.95	-3.09751	0.439352	-7.05019	1.79e-12	1.21e-10
OTUD7A	175.259	-1.12142	0.159173	-7.04529	1.85e-12	1.25e-10
GUCY1A3	1960.06	1.53939	0.218586	7.0425	1.89e-12	1.27e-10
FAN1	1079.61	-0.816924	0.116013	-7.04169	1.9e-12	1.27e-10
LRP2BP	246.276	-1.04792	0.148893	-7.03807	1.95e-12	1.3e-10
BMP7	3769.27	-1.25274	0.178373	-7.02315	2.17e-12	1.44e-10
NMB	190.773	-1.82098	0.259561	-7.01561	2.29e-12	1.51e-10
VPS36	1608.13	0.542477	0.0773646	7.01195	2.35e-12	1.53e-10
HAR1A	237.081	1.63569	0.233273	7.01192	2.35e-12	1.53e-10
SLC31A1	2256.16	-0.6108	0.0871102	-7.0118	2.35e-12	1.53e-10
LUM	298.136	-4.30175	0.614218	-7.00361	2.49e-12	1.62e-10
GJA1	6140.46	-1.33612	0.191249	-6.98626	2.82e-12	1.83e-10
PLA2R1	52.2363	-1.74119	0.249534	-6.97777	3e-12	1.93e-10
COL18A1	708.434	-1.80968	0.259524	-6.97306	3.1e-12	1.99e-10
LOC102724623	31.425	1.86065	0.26698	6.96926	3.19e-12	2.04e-10
BBOX1	213.392	-3.58703	0.514951	-6.96578	3.27e-12	2.08e-10
HEBP1	791.582	-0.927345	0.133424	-6.95039	3.64e-12	2.31e-10
KCNA4	288.662	1.238	0.178142	6.94952	3.67e-12	2.32e-10
MEIS3	2546.36	0.585712	0.0843309	6.94541	3.77e-12	2.38e-10
NDRG1	2984.23	-1.50394	0.21706	-6.92868	4.25e-12	2.66e-10
H3F3AP4	2697.92	0.840031	0.121377	6.92086	4.49e-12	2.8e-10
TSPYL5	973.259	-0.817688	0.118245	-6.91522	4.67e-12	2.91e-10
RNASEL	301.454	-0.77352	0.111908	-6.91211	4.77e-12	2.96e-10
TMEM214	1006.99	-0.669107	0.0969886	-6.89882	5.24e-12	3.24e-10
ZNF702P	373.569	1.97765	0.287006	6.89062	5.55e-12	3.42e-10
PRR5L	1025.2	-2.05023	0.298131	-6.87696	6.11e-12	3.73e-10
SEMA6D	4300.83	-0.617611	0.0898083	-6.87699	6.11e-12	3.73e-10
FAS	134.743	-1.49208	0.217025	-6.87512	6.19e-12	3.77e-10
RYR1	186.193	-1.33692	0.194627	-6.86915	6.46e-12	3.9e-10
COL6A1	5720.47	-0.626948	0.0912766	-6.86866	6.48e-12	3.9e-10
DLC1	294.298	-1.17814	0.171506	-6.86938	6.45e-12	3.9e-10
C10orf105	178.962	-2.29943	0.335036	-6.86323	6.73e-12	4.04e-10
MYOZ3	315.509	0.938563	0.137103	6.8457	7.61e-12	4.55e-10
SYTL4	134.282	-1.40335	0.205017	-6.84507	7.64e-12	4.55e-10
CACNA2D3	939.673	1.01431	0.148286	6.84018	7.91e-12	4.69e-10
SLC16A1	6020.69	-1.16246	0.170109	-6.83363	8.28e-12	4.86e-10
RBMS1	461.607	-2.05149	0.300203	-6.83365	8.28e-12	4.86e-10
CLDND1	4331.12	-0.488036	0.0714111	-6.83419	8.25e-12	4.86e-10
CLN5	1183.75	-0.648702	0.0949956	-6.82876	8.56e-12	5.01e-10
OLFML2B	85.6513	-3.92775	0.575805	-6.82132	9.02e-12	5.25e-10
PRKCQ	280.419	-1.7026	0.250041	-6.8093	9.81e-12	5.69e-10
FRMD6	251.937	-0.939173	0.138038	-6.80372	1.02e-11	5.9e-10
NR5A1	20.2996	-4.77839	0.702429	-6.80267	1.03e-11	5.92e-10
LOC100130417	126.814	1.27674	0.187806	6.7982	1.06e-11	6.08e-10
SLC1A2	12076.7	0.583913	0.085956	6.79316	1.1e-11	6.28e-10
CFAP45	129.853	-3.2074	0.472615	-6.7865	1.15e-11	6.55e-10
CD63	6851.53	-0.740076	0.109064	-6.78573	1.15e-11	6.56e-10
TMEM176A	49.9403	-3.87437	0.571169	-6.78322	1.18e-11	6.66e-10
MTSS1L	11707.5	-0.705825	0.104162	-6.7762	1.23e-11	6.96e-10
SDC4	406.439	-2.17778	0.321435	-6.77516	1.24e-11	6.99e-10
ANXA2	2764.11	-2.48329	0.367181	-6.76312	1.35e-11	7.57e-10
GOLGA6L9	350.043	0.824114	0.121981	6.75606	1.42e-11	7.92e-10
ABCC1	1205.2	-0.798704	0.118381	-6.74689	1.51e-11	8.41e-10
KIF19	32.5929	-2.15421	0.319402	-6.74451	1.54e-11	8.52e-10
EPB41L2	1389.78	-0.890793	0.132228	-6.73679	1.62e-11	8.95e-10
TPST2	404.39	-1.2743	0.189277	-6.73245	1.67e-11	9.19e-10
GRAMD3	423.76	-2.94256	0.43776	-6.72185	1.79e-11	9.85e-10
LRP10	1286.8	-1.15414	0.171764	-6.71937	1.83e-11	9.94e-10
CHRNA7	137.325	-0.913685	0.135982	-6.71915	1.83e-11	9.94e-10
PSMG3.AS1	217.263	0.762888	0.113529	6.71974	1.82e-11	9.94e-10
HTR2C	4131.11	-2.58909	0.38543	-6.7174	1.85e-11	1e-09
GADD45B	155.329	-2.01677	0.300716	-6.70656	1.99e-11	1.08e-09
VASH2	2093.06	1.18606	0.176999	6.70097	2.07e-11	1.11e-09
FCGRT	393.638	-1.46752	0.219012	-6.70064	2.08e-11	1.11e-09
MICA	202.492	-1.82261	0.271989	-6.70104	2.07e-11	1.11e-09
FYCO1	370.77	-0.992918	0.148221	-6.69891	2.1e-11	1.12e-09
MAML2	806.927	-0.826867	0.123495	-6.69556	2.15e-11	1.14e-09
RFX2	506.449	-1.20522	0.180227	-6.68722	2.27e-11	1.2e-09
DRC1	355.133	-2.17779	0.325665	-6.68722	2.27e-11	1.2e-09
NDNF	689.312	-2.02241	0.302454	-6.68668	2.28e-11	1.2e-09
HSPA5	32890.8	-0.987951	0.147879	-6.6808	2.38e-11	1.25e-09
FRMPD4	711.831	0.992217	0.148537	6.67994	2.39e-11	1.25e-09
ADARB2	1488.92	1.09388	0.163837	6.67664	2.44e-11	1.27e-09
PRSS23	631.301	-2.20122	0.329828	-6.67385	2.49e-11	1.29e-09
SS18L1	4835.53	0.449851	0.0674073	6.67362	2.5e-11	1.29e-09
ATP1A2	21768.4	-1.13534	0.170288	-6.66718	2.61e-11	1.35e-09
ABHD14B	74.9619	-1.34566	0.201964	-6.66289	2.68e-11	1.38e-09
GAPDH	62788.9	-0.6749	0.101397	-6.65604	2.81e-11	1.44e-09
MGAT4C	619.651	0.770247	0.116008	6.63959	3.15e-11	1.61e-09
TTC9	3302.59	0.603109	0.0908767	6.63657	3.21e-11	1.64e-09
C16orf89	64.0025	-3.55687	0.536307	-6.63216	3.31e-11	1.68e-09
CRISPLD1	5240.41	-1.93569	0.291927	-6.63071	3.34e-11	1.69e-09
TECR	2235.59	-1.0264	0.154869	-6.62752	3.41e-11	1.72e-09
ST5	1794.39	-0.95572	0.144226	-6.62653	3.44e-11	1.73e-09
P4HB	8877.04	-0.728417	0.109945	-6.62526	3.47e-11	1.74e-09
CPA4	23.9673	-3.05834	0.46175	-6.62339	3.51e-11	1.76e-09
SALL3	711.655	1.62971	0.246168	6.62031	3.58e-11	1.79e-09
LINC00581	65.601	1.94257	0.293916	6.60927	3.86e-11	1.92e-09
EFNB3	11235.6	-1.42167	0.215228	-6.6054	3.96e-11	1.97e-09
ECM2	185.697	-4.61186	0.698703	-6.60059	4.1e-11	2.02e-09
LAMA4	940.313	-1.44826	0.219731	-6.59104	4.37e-11	2.15e-09
LRIG1	4611.07	-1.06886	0.162255	-6.58757	4.47e-11	2.2e-09
SYPL1	1185.54	-0.760901	0.115578	-6.58341	4.6e-11	2.25e-09
LAMB2	2101.97	-1.11826	0.170027	-6.57698	4.8e-11	2.35e-09
MYH14	447.298	-3.82928	0.582406	-6.57494	4.87e-11	2.37e-09
QKI	33488.7	-0.701212	0.106668	-6.57375	4.91e-11	2.38e-09
HEPACAM	894.585	-1.34055	0.203962	-6.57252	4.95e-11	2.4e-09
SYT6	1348.05	0.888875	0.135381	6.56575	5.18e-11	2.5e-09
DNM2	2841.08	-0.4482	0.0683037	-6.56187	5.31e-11	2.55e-09
ARHGAP24	736.6	-1.71159	0.260823	-6.56226	5.3e-11	2.55e-09
YBX3	1680.57	-1.33327	0.203489	-6.55207	5.67e-11	2.72e-09
AGTRAP	127.593	-1.2237	0.186874	-6.54824	5.82e-11	2.78e-09
MGST1	1456.75	-3.71738	0.567984	-6.54486	5.95e-11	2.83e-09
ACTN2	251.543	0.718501	0.109794	6.5441	5.99e-11	2.84e-09
PLP2	117.062	-1.3958	0.213333	-6.54282	6.04e-11	2.86e-09
EFCAB14	2188.28	-0.640792	0.0980852	-6.53302	6.45e-11	3.04e-09
PLA2G16	463.012	-1.73488	0.265584	-6.53231	6.48e-11	3.05e-09
KDELR2	5154.16	-0.43811	0.0670892	-6.53026	6.57e-11	3.08e-09
P4HA1	7245.75	-1.29811	0.198956	-6.5246	6.82e-11	3.19e-09
ATAT1	8274.4	0.469098	0.0719091	6.52349	6.87e-11	3.2e-09
MAGEH1	4705.64	-1.49841	0.229904	-6.51758	7.15e-11	3.32e-09
ITPKB	2032.88	-1.77844	0.273071	-6.51273	7.38e-11	3.41e-09
DAG1	6345.98	-0.509245	0.0781899	-6.51293	7.37e-11	3.41e-09
LAMP2	9051.31	-0.885416	0.135963	-6.51217	7.41e-11	3.42e-09
MYT1L	6664.02	0.66333	0.101931	6.50761	7.64e-11	3.51e-09
SIX5	191.401	-1.02234	0.157136	-6.50608	7.71e-11	3.54e-09
PLOD3	706.667	-0.746224	0.114756	-6.50272	7.89e-11	3.61e-09
OGFRL1	1467.91	-1.49269	0.229833	-6.49469	8.32e-11	3.79e-09
EPHA4	3344.23	1.33234	0.20522	6.49225	8.46e-11	3.84e-09
PPP1R3B	256.299	-1.13574	0.174962	-6.49135	8.51e-11	3.86e-09
TMEM114	85.026	-3.62879	0.559383	-6.48712	8.75e-11	3.96e-09
HADHA	7523.13	-0.494524	0.0762398	-6.48643	8.79e-11	3.96e-09
RREB1	254.958	-1.05256	0.162338	-6.48375	8.95e-11	4.02e-09
SRPR	3385.48	-0.776104	0.119794	-6.47866	9.25e-11	4.15e-09
KANK2	384.682	-1.30579	0.201642	-6.47578	9.43e-11	4.22e-09
ID1	56.1979	-2.06439	0.319356	-6.46421	1.02e-10	4.54e-09
HOMER1	1737.29	0.672987	0.10413	6.46292	1.03e-10	4.57e-09
TC2N	750.289	-1.70595	0.264189	-6.45733	1.07e-10	4.73e-09
VIM	49736.2	-1.18452	0.183688	-6.44855	1.13e-10	4.98e-09
FIBIN	600.982	-3.53984	0.548937	-6.44854	1.13e-10	4.98e-09
CD164	3582.27	-0.875362	0.135785	-6.44667	1.14e-10	5.03e-09
DGKB	1311.48	-0.998175	0.154845	-6.44629	1.15e-10	5.03e-09
NDP	256.632	1.1931	0.18516	6.4436	1.17e-10	5.11e-09
SLC5A12	33.0479	-2.14715	0.33328	-6.44248	1.18e-10	5.13e-09
PLCL2	2452.74	0.684285	0.106259	6.43978	1.2e-10	5.21e-09
SPG20	3517.25	-0.710354	0.110383	-6.43536	1.23e-10	5.35e-09
PCDH17	10927.7	-1.38458	0.215358	-6.42918	1.28e-10	5.55e-09
LAMC1	3072.06	-1.22514	0.190617	-6.42721	1.3e-10	5.61e-09
PMEL	59.1253	-3.19294	0.496986	-6.42461	1.32e-10	5.69e-09
PTPRB	363.719	-4.03039	0.627966	-6.41816	1.38e-10	5.93e-09
CFAP61	92.3764	-1.65098	0.257377	-6.41464	1.41e-10	6.05e-09
C1orf198	2225.51	-0.694371	0.108344	-6.40896	1.47e-10	6.26e-09
EPAS1	1367.98	-2.94591	0.459959	-6.40473	1.51e-10	6.42e-09
PLEC	4310.48	-0.688251	0.107472	-6.40401	1.51e-10	6.43e-09
LINC01094	87.0735	-2.15611	0.336799	-6.40176	1.54e-10	6.51e-09
SCAMP4	1051.62	-0.508591	0.0797094	-6.38056	1.76e-10	7.46e-09
TCTEX1D1	155.059	-2.87406	0.4505	-6.3797	1.77e-10	7.48e-09
IFIT2	805.301	-1.60557	0.251681	-6.37941	1.78e-10	7.48e-09
SIL1	804.213	-0.81063	0.127112	-6.37731	1.8e-10	7.56e-09
NR3C1	1605.9	-1.23385	0.193501	-6.37644	1.81e-10	7.59e-09
TSHZ3	1000.89	-1.31185	0.205903	-6.37122	1.88e-10	7.83e-09
CEBPD	185.305	-2.50133	0.392897	-6.3664	1.94e-10	8.06e-09
SAMD5	1506.19	-1.22718	0.192802	-6.36499	1.95e-10	8.11e-09
ELOVL6	1585.11	0.87117	0.136884	6.36432	1.96e-10	8.13e-09
DSC3	99.638	-3.05546	0.480201	-6.36288	1.98e-10	8.18e-09
SNAP25	7598.24	0.532395	0.0837577	6.35637	2.07e-10	8.52e-09
NRIP1	4365.21	0.632638	0.0995434	6.3554	2.08e-10	8.55e-09
ISCA1	2478.21	0.335557	0.0528137	6.35359	2.1e-10	8.63e-09
GPC3	1069.63	-3.42176	0.539525	-6.34218	2.27e-10	9.27e-09
PCDH10	9397.43	0.643116	0.10154	6.33365	2.39e-10	9.77e-09
C1QL1	201.216	-1.76031	0.277959	-6.33301	2.4e-10	9.79e-09
FAM182A	36.9564	-2.61778	0.413447	-6.33159	2.43e-10	9.85e-09
WBP5	2272.14	-0.648164	0.102426	-6.32811	2.48e-10	1.01e-08
NPC1	944.588	-0.711199	0.112416	-6.32652	2.51e-10	1.01e-08
AGAP7P	15.628	2.72743	0.431544	6.32018	2.61e-10	1.05e-08
EHD2	727.969	-1.99423	0.315685	-6.31716	2.66e-10	1.07e-08
DCLRE1B	864.204	0.408088	0.0646745	6.30988	2.79e-10	1.12e-08
EMP1	396.831	-2.59808	0.411991	-6.30617	2.86e-10	1.14e-08
PDIA6	4234.63	-0.404036	0.0640954	-6.30367	2.91e-10	1.16e-08
APOL1	19.9493	-4.0312	0.640049	-6.29827	3.01e-10	1.2e-08
HYOU1	8381.03	-0.579751	0.092133	-6.29254	3.12e-10	1.24e-08
SIDT2	1023.28	-0.707505	0.112483	-6.2899	3.18e-10	1.26e-08
FGD4	3633.09	0.680566	0.108265	6.2861	3.26e-10	1.29e-08
COQ2	429.005	0.591945	0.0941866	6.28481	3.28e-10	1.29e-08
STON1	779.328	-1.39415	0.221888	-6.28312	3.32e-10	1.31e-08
APOL6	61.0097	-3.47958	0.553856	-6.28246	3.33e-10	1.31e-08
TTC6	35.1387	-3.52032	0.560812	-6.27719	3.45e-10	1.35e-08
LPP	1050.19	-0.763394	0.121622	-6.27679	3.46e-10	1.35e-08
EIF1AX	8815.69	0.553934	0.0882552	6.2765	3.46e-10	1.35e-08
LOC389906	702.287	0.636258	0.101442	6.27211	3.56e-10	1.38e-08
UAP1L1	276.857	-1.84111	0.293641	-6.26992	3.61e-10	1.4e-08
TMEM44	510.962	0.730734	0.11658	6.26808	3.66e-10	1.41e-08
PCDHGA7	216.341	-5.18884	0.8292	-6.25764	3.91e-10	1.51e-08
ZFP36L1	4203.02	-0.994671	0.159124	-6.25091	4.08e-10	1.57e-08
RAB11FIP1	892.659	-1.16999	0.187182	-6.25054	4.09e-10	1.57e-08
GSTA4	5363.62	0.356345	0.0570163	6.24989	4.11e-10	1.57e-08
LINC01279	46.6086	-1.68809	0.270353	-6.24403	4.26e-10	1.63e-08
SERTAD4	585.298	1.85677	0.297624	6.23867	4.41e-10	1.68e-08
MBIP	3037.21	-0.813457	0.130383	-6.23899	4.4e-10	1.68e-08
RAB20	94.5201	-1.56785	0.251539	-6.23304	4.57e-10	1.74e-08
FERD3L	22.1332	-4.66785	0.748975	-6.23231	4.6e-10	1.74e-08
CSRNP2	4451.63	0.361045	0.0580369	6.22096	4.94e-10	1.87e-08
ACBD6	1777.62	0.321376	0.0516822	6.21832	5.03e-10	1.9e-08
FRMPD1	65.7892	1.01091	0.162593	6.21745	5.05e-10	1.9e-08
APOBEC3C	60.608	-2.01131	0.323618	-6.21505	5.13e-10	1.93e-08
FAM129A	269.786	-1.41977	0.228722	-6.20742	5.39e-10	2.01e-08
RUVBL1	1712.22	0.400848	0.0645742	6.20756	5.38e-10	2.01e-08
ZNF804A	1517.07	0.969479	0.156214	6.2061	5.43e-10	2.02e-08
ESYT1	1033.9	-0.64954	0.10471	-6.20322	5.53e-10	2.06e-08
PIGT	1359.92	-0.663284	0.106964	-6.20103	5.61e-10	2.08e-08
QPRT	620.432	-1.065	0.171859	-6.19697	5.76e-10	2.13e-08
LRRC2	62.8125	-2.40358	0.388458	-6.18749	6.11e-10	2.26e-08
SLC12A4	706.048	-0.960993	0.155407	-6.18372	6.26e-10	2.31e-08
ZNF558	574.807	-5.49471	0.888968	-6.181	6.37e-10	2.34e-08
CAV1	171.438	-2.7803	0.450506	-6.1715	6.76e-10	2.48e-08
SLC5A3	5205.12	-1.25137	0.202941	-6.16616	7e-10	2.56e-08
SP8	881.62	3.46239	0.561869	6.16228	7.17e-10	2.62e-08
NTRK2	48716.7	-1.39558	0.226844	-6.15215	7.64e-10	2.79e-08
IGSF5	221.385	-1.69193	0.275109	-6.15006	7.75e-10	2.82e-08
AR	367.179	-1.52244	0.247573	-6.14945	7.78e-10	2.82e-08
LAMP5	243.62	2.37769	0.386826	6.14665	7.91e-10	2.87e-08
SLC4A4	4590.11	-0.813759	0.132497	-6.14173	8.16e-10	2.95e-08
TEAD1	3675.59	-0.838709	0.136703	-6.13526	8.5e-10	3.06e-08
STIM1	2088.05	-0.577901	0.0942155	-6.13382	8.58e-10	3.09e-08
KIT	1645.12	0.738957	0.120503	6.13229	8.66e-10	3.11e-08
SFTA3	1110.04	-3.22117	0.525532	-6.12935	8.82e-10	3.16e-08
RARRES3	44.2929	-3.08383	0.503227	-6.12812	8.89e-10	3.18e-08
ZBTB7C	758.447	-1.59384	0.260107	-6.12761	8.92e-10	3.18e-08
TTC39C	739.459	-0.577959	0.0943589	-6.12511	9.06e-10	3.22e-08
SULF2	7232.35	-1.55661	0.254174	-6.12421	9.11e-10	3.24e-08
SLC30A8	120.274	-4.50351	0.735764	-6.12087	9.31e-10	3.3e-08
CALR	17589.8	-0.659337	0.10776	-6.11857	9.44e-10	3.34e-08
DPP7	908.871	-0.923476	0.150985	-6.11633	9.58e-10	3.38e-08
PTRF	568.74	-3.29011	0.538024	-6.11517	9.65e-10	3.39e-08
EVL	9435.18	0.37957	0.0621364	6.10865	1e-09	3.52e-08
C7orf57	51.9928	-3.10536	0.508331	-6.10894	1e-09	3.52e-08
DSG2	802.761	-1.21642	0.199185	-6.10699	1.02e-09	3.55e-08
FAM114A1	656.777	-0.900911	0.147531	-6.1066	1.02e-09	3.55e-08
CTTNBP2	914.883	0.820032	0.134537	6.09521	1.09e-09	3.8e-08
SURF4	4647.25	-0.483142	0.0792666	-6.09515	1.09e-09	3.8e-08
NEK7	1214.87	-1.19808	0.196639	-6.09282	1.11e-09	3.84e-08
PDGFC	1686.5	-1.43677	0.235804	-6.09306	1.11e-09	3.84e-08
KDELR3	118.841	-1.50807	0.247602	-6.09073	1.12e-09	3.88e-08
PCSK4	125.13	-1.33879	0.220189	-6.08021	1.2e-09	4.14e-08
LRP4	2340.53	-1.19036	0.195926	-6.07557	1.24e-09	4.25e-08
FUT8	2479.49	0.490236	0.0807845	6.06844	1.29e-09	4.43e-08
PTPN14	348.538	-0.82122	0.135364	-6.06675	1.31e-09	4.47e-08
IFIT1	563.302	-1.2801	0.211022	-6.06619	1.31e-09	4.47e-08
FRY	4459.01	0.691011	0.113914	6.06608	1.31e-09	4.47e-08
SNTB1	813.023	-1.22874	0.202573	-6.06564	1.31e-09	4.47e-08
LOC729683	234.453	0.971503	0.160186	6.06485	1.32e-09	4.48e-08
C17orf51	1245.53	0.58196	0.0959789	6.06341	1.33e-09	4.52e-08
PMEPA1	1372.53	0.827864	0.13658	6.06137	1.35e-09	4.56e-08
[truncated: 15,888 more rows]
