# Supplementary material for: Human forebrain assembloids modeling a neurodevelopmental disorder reveals neural circuit deficits via DNA damage
Source: Research Square preprint supplement (doi:10.21203/rs.3.rs-7957934/v1), 2025-11-14
Supplement: Supplementary file 3 [file 72bb5076c735f95a2d9dd555.xlsx]

## Sheet: GE NPC_Up
ID	Description	GeneRatio	BgRatio	RichFactor	FoldEnrichment	zScore	pvalue	p.adjust	qvalue	geneID	Count
GO:0072594	establishment of protein localization to organelle	116/2412	454/18888	0.255507	2.00083	8.25893	6.71191e-14	3.97614e-10	3.50433e-10	USP9X/PHB2/BAG6/KPNA5/SRP54/IPO5/TIMM8B/KPNB1/JAK2/ATF2/TOMM7/VPS54/SRPRB/RAB3GAP1/TSC2/FBXW7/TIMM50/KPNA3/VPS13C/HGS/TXNIP/SREBF2/TIMM44/RPAIN/SEC61G/CACNG7/SPCS3/NIPBL/TIMM17A/VPS13A/HUWE1/PEX6/HTRA2/SRPRA/PEX13/IMMP2L/VPS8/STAM/KPNA1/TIMM22/BAP1/UFM1/VPS53/HYAL2/FBXO7/HPS4/VPS37D/CBLB/CACNG4/KPNA4/JUP/STAM2/BCS1L/PIK3C3/VPS37B/WRAP53/OXA1L/HAX1/TIMM23/IFT122/VPS41/PXK/LONP2/EFCAB7/KPNA6/ING1/R…	116
GO:0043161	proteasome-mediated ubiquitin-dependent protein catabolic process	91/2412	389/18888	0.233933	1.83189	6.34327	4.52575e-09	1.34053e-05	1.18146e-05	USP9X/PSMD10/HSPA1B/HSPA1A/BAG6/KLHDC3/HECTD1/KLHDC2/TBL1X/ITCH/PSMB4/NEDD4L/FBXW7/CAMLG/SOCS5/KLHDC10/FBXL16/DTX4/FBXW4/FBXL2/KEAP1/FBXL19/CBFA2T3/SIAH2/HSPBP1/FBXL5/FBXO7/PSMB6/PJA2/GSK3B/KLHL20/SPSB4/BBS7/XPO1/TRIB1/UBXN7/GLMN/SMURF2/BIRC2/UBXN2A/N4BP1/SMAD7/USP38/FBXL20/ZYG11B/FBXO17/FBXW5/USP25/GSK3A/SPSB3/FBXO45/ERCC8/COP1/PML/ARRB2/SHARPIN/WDR26/PEX10/PSMD2/UCHL5/DVL1/FBXL7/KBTBD6/TRPC4AP/…	91
GO:0010975	regulation of neuron projection development	102/2412	460/18888	0.221739	1.7364	6.11788	1.11138e-08	2.1946e-05	1.93419e-05	INPP5F/PAK3/PAX6/IGF1R/VEGFA/HES1/KIF1A/WNT7A/EPHA7/PLXNB2/STAU2/EIF4G2/ITM2C/EFNB2/L1CAM/SEMA3A/NEDD4L/NDNF/TMEM106B/ATP1B2/PLXNA3/SNAP25/KIF26A/PTPRD/SYNGAP1/SS18L1/KIDINS220/IFRD1/PAK1/NSMF/KDM1A/CDH2/DAB1/NTRK3/SKIL/PTPRO/STK11/BMP7/TMEM30A/CDK5R1/ITGA6/LRP4/SEMA6C/FBXO7/SEMA7A/PREX1/SFRP2/HECW1/NOVA2/PTPRG/PARP6/ROBO2/SF3A2/PTN/GSK3B/KNDC1/NRDC/CNR1/EPHA3/NTRK2/FGFR1/TOX/NCK1/EFNA1/MAP3K13/A…	102
GO:0071806	protein transmembrane transport	26/2412	66/18888	0.393939	3.08488	6.49178	4.78186e-08	5.06456e-05	4.4636e-05	USP9X/SRP54/C2CD5/TOMM7/BCR/TIMM50/TIMM44/SEC61G/TIMM17A/PEX6/PEX13/TIMM22/MCL1/TIMM23/LONP2/PEX5/HSPD1/SEC62/PEX2/TIMM17B/PEX10/GRPEL2/SEC61A2/TRAM1L1/AIFM1/TIMM21	26
GO:0030900	forebrain development	91/2412	408/18888	0.223039	1.74659	5.83315	5.12337e-08	5.06456e-05	4.4636e-05	IGF2BP1/PAX6/IGF1R/ERBB4/BCL11B/ADGRG1/HES1/ATRX/WNT7A/MDGA1/NRP2/SOX3/NEUROD6/SEMA3A/RAB3GAP1/KDM6B/PLCB1/NDNF/ATP1B2/PLXNA3/KIF26A/SRC/RPGRIP1L/KDM1A/CDH2/DAB1/FXR2/RARA/SRD5A1/CDON/OTX1/HTRA2/PEX13/NF2/RAC3/CDK5R1/TMEM108/SEMA7A/AGTPBP1/ATP7A/UQCRQ/NPY/HERC1/KIRREL3/DCLK1/FGF2/ROBO2/C12orf57/GSK3B/SUN2/PGAP1/HES5/NTRK2/INHBB/RFX4/ZSWIM6/FXR1/PEX5/FGFR1/TOX/CDK5R2/BTG2/NOG/ZEB1/BTBD3/DRAXIN/ID2…	91
GO:0006605	protein targeting	77/2412	327/18888	0.235474	1.84396	5.89033	5.12954e-08	5.06456e-05	4.4636e-05	BAG6/SRP54/C2CD5/TIMM8B/TOMM7/VPS54/ARL6IP1/SRPRB/FBXW7/TIMM50/VPS13C/HGS/SREBF2/TIMM44/SEC61G/SPCS3/TIMM17A/AKAP6/VPS52/TCAF1/VPS13A/HUWE1/KCNB1/PEX6/HTRA2/SRPRA/ZDHHC6/IMMP2L/CDK5R1/VPS8/TIMM22/BAP1/VPS53/FBXO7/HPS4/HPCA/VPS37D/PIK3C3/VPS37B/HAX1/TIMM23/VPS41/PXK/LONP2/ZDHHC2/HSPD1/PMPCA/BCAP31/SEC62/HRAS/CACNG2/GSK3A/NCOA4/PINK1/TIMM17B/INPP5K/CIB1/VPS4A/ARIH2/SORL1/GRPEL2/MIEF2/SYNGR1/SLC1A1/…	77
GO:1902414	protein localization to cell junction	35/2412	108/18888	0.324074	2.53777	6.13198	8.85431e-08	7.49328e-05	6.60412e-05	NLGN2/ERBB4/WNT7A/STAU2/STAU1/ACTG1/NSG1/JAM3/TJP1/ADAM10/SNAP25/ABHD17B/KIF3A/CACNG7/HSPB1/HOMER1/JAK1/NETO2/F11R/FERMT2/GRIP2/GRIP1/C1QL2/ZDHHC2/HRAS/CACNG2/CPLX1/SLITRK3/NECTIN3/DVL1/HEG1/LAMTOR2/BSN/FLNA/LGI1	35
GO:0021537	telencephalon development	66/2412	275/18888	0.24	1.8794	5.6207	2.15516e-07	0.000131236	0.000115663	IGF2BP1/PAX6/IGF1R/ERBB4/BCL11B/ADGRG1/HES1/MDGA1/NEUROD6/SEMA3A/KDM6B/PLCB1/ATP1B2/PLXNA3/KIF26A/RPGRIP1L/KDM1A/CDH2/DAB1/FXR2/RARA/SRD5A1/CDON/PEX13/NF2/CDK5R1/TMEM108/SEMA7A/AGTPBP1/UQCRQ/NPY/HERC1/KIRREL3/ROBO2/C12orf57/GSK3B/SUN2/HES5/NTRK2/RFX4/ZSWIM6/FXR1/PEX5/CDK5R2/BTG2/BTBD3/DRAXIN/ID2/FBXO45/RTN4RL1/TBR1/UCHL5/SYNE2/EPHB3/FGF13/FAT4/SHANK3/KIF14/WDR89/KCNA3/MBOAT7/PROX1/TH/FLNA/NF1/ATP…	66
GO:0050804	modulation of chemical synaptic transmission	103/2412	493/18888	0.208925	1.63606	5.47539	2.21532e-07	0.000131236	0.000115663	CASK/CHRDL1/SYAP1/NLGN2/NLGN4X/PFN2/WNT7A/EPHA7/STAU2/STAU1/CNTNAP4/NSG1/CALB2/LRRTM2/JAK2/RAB3GAP1/BCR/PLCB1/CDH11/SNAP25/PTPRD/SYNGAP1/BEGAIN/PCDH8/SSH1/CPLX2/RAB3A/VAMP2/CACNG7/NSMF/CBLN2/SLC38A1/CDH2/FXR2/RARA/NEUROD2/HOMER1/KCNB1/SLC1A3/GRM4/CELF4/TMEM108/DLGAP1/JPH3/CHRM1/SCGN/CACNG4/SHISA7/PTN/GSK3B/PXK/CNR1/NTRK2/PDE9A/FXR1/PLCL1/F2R/IGSF11/FBXL20/NOG/C22orf39/MEF2C/ZDHHC2/NCSTN/ARC/DGKE/…	103
GO:0050808	synapse organization	103/2412	493/18888	0.208925	1.63606	5.47539	2.21532e-07	0.000131236	0.000115663	CHRDL1/NLGN2/PAK3/COL4A5/IGF1R/ERBB4/ADGRL3/NLGN4X/PFN2/KIF1A/WNT7A/EPHA7/WASF3/PLXNB2/STAU2/STAU1/ACTG1/LRRTM2/ST8SIA2/SPTBN2/MDGA1/NRP2/PCDHB14/L1CAM/EIF4G1/PCDHB13/ADAM10/HIP1R/SDK2/PCDHB11/SNAP25/PTPRD/SYNGAP1/PCDH8/ABHD17B/SSH1/CPNE6/RAB3A/GABRB3/CBLN2/CDH2/IL1RAPL2/NEUROD2/ARF4/ADGRL1/PTPRO/SETD5/INSR/HOMER1/PCDHB16/WASF1/RAC3/IGSF21/CDK5R1/GPM6A/LRP4/TMEM108/KIRREL3/CACNB3/GABRA2/SHISA7/RA…	103
GO:0099177	regulation of trans-synaptic signaling	103/2412	494/18888	0.208502	1.63275	5.45255	2.45469e-07	0.000132196	0.00011651	CASK/CHRDL1/SYAP1/NLGN2/NLGN4X/PFN2/WNT7A/EPHA7/STAU2/STAU1/CNTNAP4/NSG1/CALB2/LRRTM2/JAK2/RAB3GAP1/BCR/PLCB1/CDH11/SNAP25/PTPRD/SYNGAP1/BEGAIN/PCDH8/SSH1/CPLX2/RAB3A/VAMP2/CACNG7/NSMF/CBLN2/SLC38A1/CDH2/FXR2/RARA/NEUROD2/HOMER1/KCNB1/SLC1A3/GRM4/CELF4/TMEM108/DLGAP1/JPH3/CHRM1/SCGN/CACNG4/SHISA7/PTN/GSK3B/PXK/CNR1/NTRK2/PDE9A/FXR1/PLCL1/F2R/IGSF11/FBXL20/NOG/C22orf39/MEF2C/ZDHHC2/NCSTN/ARC/DGKE/…	103
GO:0007156	homophilic cell adhesion via plasma membrane adhesion molecules	45/2412	168/18888	0.267857	2.09755	5.46726	7.4884e-07	0.000369677	0.000325811	PCDHA10/PLXNB2/PCDH11X/PCDHB14/L1CAM/CADM2/PCDHB13/SDK2/CDH11/PCDHB11/PCDHB12/PCDH8/CDH2/CDH22/CDH23/PCDHB16/IGSF21/CADM3/PTPRM/PCDH19/KIRREL3/ROBO2/PCDH1/PVR/PCDHAC1/IGSF9/DSCAML1/PCDHGA7/IGSF11/PCDHA11/PCDH7/TENM3/PCDHA8/NECTIN3/PCDHB7/FAT4/PCDHB10/NPTN/PCDHA9/PCDHGA9/PCDHGA10/PCDHGC3/AMIGO1/CDHR1/PCDHA12	45
GO:0044743	protein transmembrane import into intracellular organelle	17/2412	38/18888	0.447368	3.50327	5.91002	1.21221e-06	0.000552395	0.000486847	USP9X/TOMM7/TIMM50/TIMM44/TIMM17A/PEX6/PEX13/TIMM23/LONP2/PEX5/HSPD1/PEX2/TIMM17B/PEX10/GRPEL2/AIFM1/TIMM21	17
GO:0016197	endosomal transport	66/2412	289/18888	0.228374	1.78836	5.16741	1.43166e-06	0.000605797	0.000533913	INPP5F/NSG1/VPS54/RAB9B/ITSN1/PICALM/SNAP25/SRC/HEATR5B/HGS/NSG2/LEPROTL1/SNX17/VPS13B/TMCC1/VPS52/VPS26B/TMEM87B/NF2/VTA1/STAM/VPS53/STX5/VPS37D/DCLK1/STAM2/PIK3C3/SNX4/VPS37B/RAB14/GRIP2/GRIP1/PXK/REPS2/RAB8B/ZDHHC2/TMEM50B/ARL1/VAMP4/PLEKHA3/TBC1D10A/ANKRD50/STX6/VPS4A/SORL1/SNX7/RAB10/SNX2/ITSN2/VPS29/VPS39/HOOK3/TBC1D23/VPS37A/EEA1/ARHGAP1/DENND2A/EHD1/PREPL/EHD3/WASHC4/VPS35L/FLNA/BVES/RAB9…	66
GO:0048813	dendrite morphogenesis	38/2412	140/18888	0.271429	2.12552	5.11425	3.747e-06	0.00147981	0.00130422	PAK3/IGF2BP1/KIF1A/WNT7A/STAU2/SEMA3A/NEDD4L/TMEM106B/PICALM/PTPRD/SS18L1/KIDINS220/NSMF/STK11/PREX2/CDK5R1/LRP4/KLF7/MEF2A/HECW1/DCLK1/PARP6/PTN/GSK3B/KNDC1/EFNA1/ARC/BTBD3/WASL/DVL1/EPHB3/SHANK3/NFATC4/CAPRIN2/CUX2/HECW2/CDKL5/CUL7	38
GO:0016358	dendrite development	55/2412	235/18888	0.234043	1.83275	4.91495	4.83101e-06	0.00178868	0.00157643	NLGN2/PAK3/IGF2BP1/KIF1A/WNT7A/STAU2/EIF4G2/SEMA3A/NEDD4L/TMEM106B/PICALM/PTPRD/SYNGAP1/SS18L1/KIDINS220/NSMF/DAB1/ACTL6B/ARF4/STK11/BMP7/PREX2/MAPK6/CDK5R1/LRP4/KLF7/MEF2A/PREX1/HECW1/TRAPPC4/DCLK1/PARP6/FOXO6/PTN/GSK3B/KNDC1/MATN2/MAPKAPK5/IGSF9/EFNA1/MEF2C/ARC/BTBD3/WASL/DVL1/EPHB3/SHANK3/IQSEC1/NFATC4/CAPRIN2/CUX2/HECW2/CDKL5/CUL7/FLRT1	55
GO:0098727	maintenance of cell number	46/2412	186/18888	0.247312	1.93666	4.91178	6.0807e-06	0.0020813	0.00183433	RBBP7/IGF2BP1/RAF1/MED14/HES1/WNT7A/KDM3A/VPS72/TUT4/SOX9/CDH2/NIPBL/SAP30L/NCOA3/ACTL6B/BMP7/MMP24/PAF1/MTF2/MED28/JAG1/FZD7/KLF10/HMGA2/PTN/HES5/ING1/SELENON/NOG/TET1/MED15/MYC/BICRA/FANCD2/STAT3/MED12/SRRT/WDR43/SINHCAF/HOOK3/SMC5/NKAP/BCL9L/PROX1/METTL14/RIF1	46
GO:0048015	phosphatidylinositol-mediated signaling	12/2412	23/18888	0.521739	4.08566	5.66536	6.32399e-06	0.0020813	0.00183433	INPP5F/PLCB1/PIK3C2B/PLCB4/PIK3CA/PIK3C3/FGFR1/PI4KA/PLCG1/PLCD1/PLCH2/PI4KB	12
GO:0009247	glycolipid biosynthetic process	25/2412	78/18888	0.320513	2.50989	5.1126	7.40907e-06	0.00227645	0.00200632	ST8SIA4/TM9SF2/ST8SIA2/ST6GALNAC5/ST8SIA1/PIGN/ST6GALNAC3/B4GALNT1/ST3GAL2/ST3GAL5/PGAP1/SLC30A5/ST3GAL1/PIGT/ST3GAL6/PIGX/B3GNT5/PIGU/PGAP2/PIGF/UGT8/PIGL/ST3GAL4/B3GALT1/PIGG	25
GO:0019827	stem cell population maintenance	45/2412	182/18888	0.247253	1.9362	4.85576	7.68551e-06	0.00227645	0.00200632	RBBP7/IGF2BP1/RAF1/MED14/HES1/WNT7A/KDM3A/VPS72/TUT4/SOX9/CDH2/NIPBL/SAP30L/NCOA3/ACTL6B/BMP7/MMP24/PAF1/MTF2/MED28/JAG1/FZD7/KLF10/HMGA2/PTN/HES5/ING1/NOG/TET1/MED15/MYC/BICRA/FANCD2/STAT3/MED12/SRRT/WDR43/SINHCAF/HOOK3/SMC5/NKAP/BCL9L/PROX1/METTL14/RIF1	45
GO:2000058	regulation of ubiquitin-dependent protein catabolic process	42/2412	166/18888	0.253012	1.9813	4.85874	8.29054e-06	0.00233872	0.00206121	USP9X/PSMD10/HSPA1B/HSPA1A/BAG6/HECTD1/FBXW7/CAMLG/SOCS5/KEAP1/HIPK2/CBFA2T3/HSPBP1/AGTPBP1/GSK3B/BBS7/XPO1/TRIB1/GLMN/N4BP1/SMAD7/USP38/ZYG11B/BCAP31/GSK3A/COP1/PML/UCHL5/DVL1/TRIM67/DESI1/CSNK1D/PLK3/AXIN1/ARAF/L3MBTL3/DNAJB2/STYX/IL33/SOCS4/AGBL4/UFL1	42
GO:0065002	intracellular protein transmembrane transport	14/2412	31/18888	0.451613	3.53651	5.40786	9.30558e-06	0.00250574	0.00220841	USP9X/SRP54/C2CD5/BCR/SEC61G/PEX6/PEX13/LONP2/PEX5/SEC62/PEX2/PEX10/SEC61A2/TRAM1L1	14
GO:0010563	negative regulation of phosphorus metabolic process	78/2412	379/18888	0.205805	1.61163	4.60212	1.12557e-05	0.00268613	0.00236739	INPP5F/DDIT4/GNAQ/HNRNPU/PAX6/KIRREL1/IPO5/IBTK/PKIB/EIF4G1/INSM1/TSC2/CAMK2N1/SOCS5/NTRK3/HIPK3/IMPACT/TERF2IP/HSPB1/PTPRO/IKBKB/NF2/CBFA2T3/CALM3/PPM1E/HYAL2/CALM2/SFRP2/CBLB/MEN1/CAMK2N2/DUSP16/GSK3B/PTPN13/SPRY1/TRIB1/SMAD7/AIDA/NCK1/PPP2CA/SPRY2/DUSP1/PAQR3/CDKN1B/DUSP22/GSK3A/GIT1/ARRB2/INPP5K/THY1/CIB1/URI1/PARP1/CRY2/STAT3/DVL1/STK38/HEG1/PIBF1/INHA/MYADM/CDKN1A/FKBP8/ERRFI1/PRDX3/FKBP1B/…	78
GO:0032434	regulation of proteasomal ubiquitin-dependent protein catabolic process	34/2412	125/18888	0.272	2.12999	4.84979	1.13193e-05	0.00268613	0.00236739	USP9X/PSMD10/HSPA1B/HSPA1A/BAG6/HECTD1/CAMLG/SOCS5/KEAP1/CBFA2T3/HSPBP1/GSK3B/BBS7/XPO1/TRIB1/GLMN/N4BP1/SMAD7/USP38/ZYG11B/GSK3A/COP1/UCHL5/DVL1/DESI1/CSNK1D/PLK3/AXIN1/ARAF/DNAJB2/STYX/IL33/SOCS4/UFL1	34
GO:0099173	postsynapse organization	47/2412	196/18888	0.239796	1.8778	4.72653	1.17029e-05	0.00268613	0.00236739	CHRDL1/NLGN2/PAK3/IGF1R/NLGN4X/KIF1A/WNT7A/EPHA7/STAU2/ACTG1/LRRTM2/SPTBN2/NRP2/ADAM10/HIP1R/PTPRD/SYNGAP1/ABHD17B/SSH1/CPNE6/CDH2/ARF4/INSR/HOMER1/RAC3/CDK5R1/LRP4/TMEM108/SHISA7/STK38L/C1QL2/EFNA1/ZDHHC2/ARC/GRID1/SLITRK3/WASL/DVL1/STK38/EPHB3/SHANK3/NEDD9/CAPRIN2/CUX2/CDKL5/NF1/ROR2	47
GO:0072655	establishment of protein localization to mitochondrion	33/2412	120/18888	0.275	2.15348	4.84995	1.17892e-05	0.00268613	0.00236739	TIMM8B/TOMM7/FBXW7/TIMM50/SREBF2/TIMM44/TIMM17A/HUWE1/HTRA2/IMMP2L/TIMM22/BAP1/FBXO7/HPS4/BCS1L/OXA1L/HAX1/TIMM23/HSPD1/PMPCA/BCAP31/GSK3A/PINK1/TIMM17B/ARIH2/GRPEL2/TIMM8A/PITRM1/FIS1/COX18/AIFM1/BAG4/TIMM21	33
GO:0006626	protein targeting to mitochondrion	30/2412	106/18888	0.283019	2.21628	4.80462	1.57282e-05	0.00345088	0.0030414	TIMM8B/TOMM7/FBXW7/TIMM50/SREBF2/TIMM44/TIMM17A/HUWE1/HTRA2/IMMP2L/TIMM22/BAP1/FBXO7/HPS4/HAX1/TIMM23/HSPD1/PMPCA/BCAP31/GSK3A/PINK1/TIMM17B/ARIH2/GRPEL2/TIMM8A/PITRM1/FIS1/AIFM1/BAG4/TIMM21	30
GO:0070585	protein localization to mitochondrion	34/2412	127/18888	0.267717	2.09645	4.74357	1.63498e-05	0.00345915	0.00304868	TIMM8B/TOMM7/FBXW7/TIMM50/SREBF2/TIMM44/TIMM17A/HUWE1/HTRA2/IMMP2L/TIMM22/BAP1/FBXO7/HPS4/BCS1L/OXA1L/HAX1/TIMM23/HSPD1/PMPCA/BCAP31/GSK3A/PINK1/TIMM17B/ARIH2/GRPEL2/FKBP8/TIMM8A/PITRM1/FIS1/COX18/AIFM1/BAG4/TIMM21	34
GO:0045936	negative regulation of phosphate metabolic process	77/2412	378/18888	0.203704	1.59517	4.47229	1.86389e-05	0.00372466	0.00328269	INPP5F/DDIT4/GNAQ/HNRNPU/PAX6/KIRREL1/IPO5/IBTK/PKIB/EIF4G1/INSM1/TSC2/CAMK2N1/SOCS5/NTRK3/HIPK3/IMPACT/TERF2IP/HSPB1/PTPRO/IKBKB/NF2/CBFA2T3/CALM3/PPM1E/HYAL2/CALM2/SFRP2/CBLB/MEN1/CAMK2N2/DUSP16/GSK3B/PTPN13/SPRY1/TRIB1/SMAD7/AIDA/NCK1/PPP2CA/SPRY2/DUSP1/PAQR3/CDKN1B/DUSP22/GIT1/ARRB2/INPP5K/THY1/CIB1/URI1/PARP1/CRY2/STAT3/DVL1/STK38/HEG1/PIBF1/INHA/MYADM/CDKN1A/FKBP8/ERRFI1/PRDX3/FKBP1B/DMTN/F…	77
GO:0034504	protein localization to nucleus	66/2412	311/18888	0.212219	1.66185	4.50295	1.89292e-05	0.00372466	0.00328269	HNRNPU/PHB2/KPNA5/ARL2BP/IPO5/KPNB1/JAK2/ATF2/TSC2/KPNA3/SOX9/SRC/TXNIP/RPAIN/TMEM147/LAMTOR5/STK11/NF2/PAF1/KPNA1/ORMDL3/JAK1/UFM1/HYAL2/FERMT2/CBLB/KAT7/KPNA4/DCLK1/JUP/WRAP53/GSK3B/SUN2/EFCAB7/XPO1/KPNA6/ING1/APPL2/CSE1L/ZBTB16/RANBP17/POLR1A/PLRG1/MAPK14/PML/PARP1/CRY2/POM121/STAT3/DVL1/NUAK2/IPO13/WRN/CDKN1A/UTP25/PIK3R2/UBR5/SESN2/ARL2/IL33/FLNA/NF1/TESK1/RBM22/FBXO4/KPNA2	66
GO:0031346	positive regulation of cell projection organization	74/2412	360/18888	0.205556	1.60967	4.46868	1.95148e-05	0.00372466	0.00328269	IGF1R/VEGFA/PLXNB2/STAU2/EIF4G2/SEPTIN7/L1CAM/NDNF/TMEM106B/ATP1B2/PLXNA3/PTPRD/SS18L1/HTT/KIDINS220/SRC/NCKAP1/KDM1A/NTRK3/SKIL/STK11/BMP7/TMEM30A/PIK3CA/ITGA6/GPM6A/SEMA7A/IFT20/ATP7A/PARP6/ROBO2/SF3A2/PTN/GSK3B/GRIP1/NRDC/CNR1/EPHA3/IFT88/NTRK2/RAB8B/FGFR1/TOX/NCK1/MAP3K13/PLPPR5/HRAS/MARK4/NCKIPSD/TENM3/WASL/NME2/DVL1/TRIM67/NEDD9/NPTN/CAPRIN2/DDX56/CRABP2/CNTN1/FKBP1B/EHD1/KCTD17/CUX2/CDC42E…	74
GO:0045995	regulation of embryonic development	27/2412	92/18888	0.293478	2.29818	4.77575	2.01197e-05	0.00372466	0.00328269	HES1/BAG6/AMOT/SEPTIN7/PLCB1/INO80E/INO80B/NIPBL/INSR/NR2C2/YEATS2/JAG1/SFRP2/RAB14/CCSAP/PHLDB1/NOCT/INO80/INO80C/UCHL5/KAT14/UTP25/POGLUT1/NFRKB/WDPCP/SGF29/INO80D	27
GO:0010970	transport along microtubule	42/2412	172/18888	0.244186	1.91218	4.59816	2.10089e-05	0.00377142	0.0033239	HNRNPU/KIF1A/STAU2/STAU1/IFT81/KIF1B/IFT52/TERF2/SOD1/ARHGAP21/HTT/SPG7/IFT80/KIF3A/RAB1A/HSPB1/STK11/IFT46/HSBP1/TMEM108/TUB/CAMSAP3/DYNC1I1/AGTPBP1/IFT20/IFT122/SUN2/IFT88/SSNA1/KIFAP3/COPG1/IFT172/ARL3/INTU/SYNE2/IFT27/KIF3B/PURA/LCA5/WDPCP/AGBL4/APBA1	42
GO:0035418	protein localization to synapse	24/2412	78/18888	0.307692	2.40949	4.77265	2.41607e-05	0.00420965	0.00371013	NLGN2/ERBB4/WNT7A/STAU2/STAU1/NSG1/ADAM10/SNAP25/ABHD17B/CACNG7/HSPB1/HOMER1/NETO2/GRIP2/GRIP1/C1QL2/ZDHHC2/HRAS/CACNG2/CPLX1/SLITRK3/DVL1/BSN/LGI1	24
GO:0007416	synapse assembly	48/2412	208/18888	0.230769	1.80712	4.47842	2.78309e-05	0.00435482	0.00383807	NLGN2/ERBB4/ADGRL3/NLGN4X/WNT7A/EPHA7/PLXNB2/STAU2/LRRTM2/ST8SIA2/SPTBN2/MDGA1/PCDHB14/EIF4G1/PCDHB13/SDK2/PCDHB11/SNAP25/PTPRD/GABRB3/CBLN2/CDH2/IL1RAPL2/SETD5/PCDHB16/GPM6A/LRP4/KIRREL3/GABRA2/ROBO2/PTPN13/C1QL2/NTRK2/MEF2C/ZDHHC2/FBXO45/SLITRK3/DVL1/EPHB3/FGF13/SHANK3/PCDHB10/NPTN/BSN/CUX2/LRRTM3/AMIGO1/LINGO2	48
GO:0050807	regulation of synapse organization	54/2412	243/18888	0.222222	1.74019	4.44333	2.81693e-05	0.00435482	0.00383807	NLGN2/PAK3/KIF1A/WNT7A/EPHA7/STAU2/LRRTM2/ST8SIA2/MDGA1/NRP2/EIF4G1/ADAM10/SNAP25/PTPRD/PCDH8/ABHD17B/CBLN2/CDH2/IL1RAPL2/NEUROD2/ARF4/ADGRL1/PTPRO/SETD5/HOMER1/CDK5R1/GPM6A/LRP4/ROBO2/RHOB/PTPN13/C1QL2/IGSF9/NTRK2/EFNA1/MEF2C/ARC/GRID1/MAPK14/SLITRK3/WASL/DVL1/EPHB3/SHANK3/NFATC4/NEDD9/CAPRIN2/CUX2/CDKL5/NF1/ROR2/LRRTM3/AMIGO1/LINGO2	54
GO:0031503	protein-containing complex localization	45/2412	191/18888	0.235602	1.84496	4.49069	2.84417e-05	0.00435482	0.00383807	HNRNPU/ERBB4/STAU2/STAU1/IFT81/NSG1/IFT52/EFNB2/ADAM10/TERF2/SNAP25/IFT80/CACNG7/IFT46/NETO2/TUB/HPCA/IFT20/CACNG4/GRIP2/IFT122/GRIP1/C1QL2/IFT88/SSNA1/XPO1/FXR1/SMAD7/ARC/HRAS/CACNG2/IFT172/ARL3/PML/CPLX1/INTU/WASL/IFT27/KIF3B/SLC1A1/NPTN/PURA/LCA5/WDPCP/LGI1	45
GO:0050803	regulation of synapse structure or activity	55/2412	249/18888	0.220884	1.7297	4.43486	2.85502e-05	0.00435482	0.00383807	NLGN2/PAK3/KIF1A/WNT7A/EPHA7/STAU2/LRRTM2/ST8SIA2/MDGA1/NRP2/EIF4G1/ADAM10/SNAP25/PTPRD/SYNGAP1/PCDH8/ABHD17B/CBLN2/CDH2/IL1RAPL2/NEUROD2/ARF4/ADGRL1/PTPRO/SETD5/HOMER1/CDK5R1/GPM6A/LRP4/ROBO2/RHOB/PTPN13/C1QL2/IGSF9/NTRK2/EFNA1/MEF2C/ARC/GRID1/MAPK14/SLITRK3/WASL/DVL1/EPHB3/SHANK3/NFATC4/NEDD9/CAPRIN2/CUX2/CDKL5/NF1/ROR2/LRRTM3/AMIGO1/LINGO2	55
GO:0016049	cell growth	95/2412	496/18888	0.191532	1.49986	4.31637	2.86695e-05	0.00435482	0.00383807	USP9X/PSMD10/RBBP7/HSPA1B/VEGFA/HSPA1A/DDX3X/MEIS1/EPHA7/ING4/PRMT2/ST8SIA2/EIF4G2/ITCH/NRP2/JADE1/L1CAM/EIF4G1/SEMA3A/ADAM10/NEDD4L/PLXNA3/KIF26A/SOX9/CPNE6/CACNG7/IFRD1/ST7L/IMPACT/RICTOR/STK11/AKAP6/SERTAD2/ACVR1B/BTG1/HDGFL2/WASF1/CAMK2D/JADE3/BAP1/TMEM108/SORBS2/SEMA6C/HYAL2/SEMA7A/SFRP2/KAT7/DCLK1/FXN/GSK3B/SSNA1/ING1/FHL1/ADAM17/SMAD7/PPP2CA/MAP3K13/INO80/MEAF6/NET1/DRAXIN/CDKN1B/PAK5/GSK3…	95
GO:1903533	regulation of protein targeting	24/2412	79/18888	0.303797	2.37899	4.69934	3.05425e-05	0.00444279	0.00391561	C2CD5/TOMM7/FBXW7/SREBF2/TCAF1/HUWE1/KCNB1/HTRA2/CDK5R1/BAP1/HPS4/HPCA/HAX1/HRAS/GSK3A/PINK1/INPP5K/CIB1/ARIH2/MIEF2/SLC1A1/DMTN/FIS1/BAG4	24
GO:0042391	regulation of membrane potential	87/2412	446/18888	0.195067	1.52754	4.31384	3.07486e-05	0.00444279	0.00391561	NLGN2/GNAQ/NLGN4X/WNT7A/HCN3/RAB3GAP1/NEDD4L/ATP1B2/SOD1/SRC/SSH1/ARL6IP5/CACNA1H/CACNA1C/KCNA5/GABRB3/BCL2L1/AKAP6/KCNB1/KCNH7/CAMK2D/CALM3/PPA2/PIEZO2/CELF4/TMEM108/SLC1A6/TRPM4/COL6A1/CHRM1/GLRA2/CACNA1I/KCND3/JUP/CACNB3/GABRA2/SLC4A3/BAD/KCNJ3/NTSR1/ATP1A3/KCNH2/GSK3B/CNR1/NTRK2/FHL1/SMAD7/PMAIP1/IGSF11/ABAT/MEF2C/KCNIP2/CACNG2/GSK3A/SCN8A/GRID1/PINK1/ATP1A1/KCNK3/ARRB2/ATP1B1/PARP1/DVL1/RTL1…	87
GO:0071897	DNA biosynthetic process	45/2412	192/18888	0.234375	1.83535	4.45135	3.26241e-05	0.00460155	0.00405552	HNRNPU/POLA1/ING4/HNRNPC/DACH1/PKIB/JADE1/POLK/TERF2/SRC/HMBOX1/REV1/TERF2IP/POLE3/JADE3/POLI/POLG2/KAT7/WRNIP1/MEN1/FGF2/WRAP53/USP10/MAPKAPK5/TK2/SH2B1/MEAF6/MYC/SMPD3/NFATC1/WRN/CDKN1A/GNL3L/NEK7/POT1/TENT4B/USP1/LIG3/POLD1/ING5/POLD3/RRM2B/TELO2/FBXO4/POLM	45
GO:0046488	phosphatidylinositol metabolic process	40/2412	164/18888	0.243902	1.90996	4.47806	3.35903e-05	0.00462766	0.00407853	INPP5F/PLCB1/SOCS5/SOCS7/PIK3C2B/PLCB4/PIK3CA/PIGN/PIK3C3/INPP4A/PGAP1/SLC30A5/PI4KA/MTMR3/DGKE/PLCG1/INPP5K/PIGT/PIGX/PLCD1/PIK3R2/PITPNM2/IPMK/PIGU/PGAP2/PIGF/CDIPT/SYNJ1/PLCH2/MBOAT7/PI4KB/SLC27A1/INPP5B/TMEM150A/IP6K1/EFR3A/PIGL/SACM1L/SOCS4/PIGG	40
GO:1900271	regulation of long-term synaptic potentiation	17/2412	47/18888	0.361702	2.83243	4.81249	3.70953e-05	0.00499437	0.00440174	STAU1/NSG1/CALB2/SCGN/SHISA7/PTN/GSK3B/PDE9A/FXR1/IGSF11/C22orf39/ZDHHC2/NCSTN/ARC/SHANK3/AGER/NF1	17
GO:0009101	glycoprotein biosynthetic process	67/2412	324/18888	0.20679	1.61934	4.3024	3.88854e-05	0.00511905	0.00451162	ALG13/ST8SIA4/TM9SF2/HS6ST2/GLCE/ST8SIA2/ITM2C/ST6GALNAC5/ST6GAL2/PLCB1/TMEM59/ST6GAL1/ST8SIA1/PHLDA1/TMEM258/KRTCAP2/ST6GALNAC3/HS6ST1/B4GAT1/ATP7A/POFUT2/EXT2/TET2/EXTL2/GFPT1/CHPF/ST3GAL2/GALNT14/ST3GAL5/MOGS/SERP1/GMPPB/POMGNT2/NCSTN/PXYLP1/TET1/EDEM3/PLOD3/ST3GAL1/TET3/ST3GAL6/MAN2A2/NUS1/ITM2B/B3GNT5/GOLGA2/XYLT1/HS3ST3B1/GALNT13/MGAT5B/POGLUT1/PAWR/MGAT4B/CHST3/POGLUT2/COG7/ALG3/IL33/TMTC2…	67
GO:0016236	macroautophagy	70/2412	343/18888	0.204082	1.59813	4.27735	4.11547e-05	0.00530001	0.00467111	PHB2/NBR1/TOMM7/RAB3GAP1/TSC2/FBXW7/ATG4A/VPS13C/ATG12/HTT/SRC/HGS/SREBF2/RAB1A/LIX1/PIK3C2B/EFNB1/ATG4B/ATP6V0B/HUWE1/LARP1/VPS26B/HTRA2/CDK5R1/ATP6V1H/PIK3CA/VTA1/STAM/RB1CC1/SPTLC2/UFM1/FBXO7/IFT20/VPS37D/STAM2/UBQLN2/PIK3C3/VMP1/SNX4/VPS37B/VPS41/IFT88/UBXN2A/PEX5/MTMR3/PEX2/TECPR1/EMC6/GSK3A/PGAM5/PINK1/VPS4A/SNX7/VPS39/SCFD1/VPS37A/PHF23/SESN2/SNX14/HDAC10/WDFY3/ATG4C/ATP6V1G2/TBC1D12/RAB3G…	70
GO:1990778	protein localization to cell periphery	72/2412	356/18888	0.202247	1.58377	4.25449	4.37629e-05	0.00551599	0.00486146	PSMD10/ERBB4/C2CD5/NSG1/EIF4G1/ADAM10/PICALM/SNAP25/IFT80/ARL6IP5/TMEM59/RAB3A/VAMP2/CACNG7/CDH2/BCL2L1/TSPAN5/SORBS1/KCNB1/IKBKB/NETO2/PKDCC/TUB/F11R/IFT20/KCNB2/JUP/CACNB3/PDZD11/LIN7C/BBIP1/GRIP2/FCHO2/GRIP1/C1QL2/EFCAB7/EPHA3/RAB8B/WNK1/ZDHHC2/DENND4C/HRAS/CACNG2/S100A10/ARL3/INPP5K/CPLX1/ATP1B1/CIB1/VPS4A/NECTIN3/SORL1/PACS1/RAB10/MYADM/FGF13/PIK3R2/SLC1A1/ERRFI1/EHD1/PREPL/TMEM150A/EHD3/LIN…	72
GO:0097503	sialylation	7/2412	10/18888	0.7	5.48159	5.42374	4.62997e-05	0.00571415	0.0050361	ST8SIA4/ST8SIA2/ST6GAL2/ST6GAL1/ST3GAL2/ST3GAL1/ST3GAL4	7
GO:0072583	clathrin-dependent endocytosis	17/2412	48/18888	0.354167	2.77342	4.70692	5.06493e-05	0.0061234	0.00539679	INPP5F/ITSN1/HIP1R/PICALM/STON1/TNK2/SH3GL3/UBQLN2/GPR107/FCHO2/SMAP1/SNAP91/CANX/DNM1/WASL/FCHSD2/ITSN2	17
GO:2000060	positive regulation of ubiquitin-dependent protein catabolic process	28/2412	102/18888	0.27451	2.14964	4.45441	5.443e-05	0.00644887	0.00568364	PSMD10/HSPA1B/HSPA1A/HECTD1/FBXW7/SOCS5/KEAP1/CBFA2T3/HSPBP1/AGTPBP1/GSK3B/BBS7/TRIB1/SMAD7/ZYG11B/BCAP31/GSK3A/COP1/DVL1/TRIM67/CSNK1D/PLK3/AXIN1/L3MBTL3/DNAJB2/IL33/SOCS4/AGBL4	28
GO:0045664	regulation of neuron differentiation	45/2412	196/18888	0.229592	1.7979	4.29627	5.56098e-05	0.00645946	0.00569298	PAX6/BCL11B/HES1/TCF4/MEIS1/NBL1/BRINP1/HEY1/SOX3/EIF4G1/KDM4A/SOX9/ZNF536/DAB1/IMPACT/RARA/NEUROD2/BMP7/CDON/MMD/RAC3/CDK5R1/BRINP2/JAG1/SFRP2/SH3GL3/FGF2/EFNA3/DISP3/GSK3B/HES5/FGFR1/ZEB1/MAP3K13/MEF2C/MIB1/ID2/GDF11/MMD2/KCTD11/TRIM32/PROX1/METTL14/NAP1L2/BCL6	45
GO:0098742	cell-cell adhesion via plasma-membrane adhesion molecules	59/2412	279/18888	0.21147	1.65599	4.22356	5.67974e-05	0.00647053	0.00570274	ADGRL3/PCDHA10/PLXNB2/PCDH11X/MDGA1/PCDHB14/L1CAM/CADM2/PCDHB13/SDK2/CDH11/PCDHB11/PCDHB12/PTPRD/PCDH8/CDH2/DAB1/ADGRL1/ACVR1/CDH22/CDH23/MMP24/PCDHB16/IGSF21/CADM3/PTPRM/PCDH19/KIRREL3/ROBO2/PCDH1/PVR/PCDHAC1/IGSF9/KIFAP3/WNK1/DSCAML1/PCDHGA7/IGSF11/PCDHA11/PCDH7/MAPK14/TENM3/PCDHA8/SLITRK3/NECTIN3/PCDHB7/CLDN12/MYADM/FAT4/PCDHB10/NPTN/PCDHA9/PCDHGA9/FGFRL1/PCDHGA10/PCDHGC3/AMIGO1/CDHR1/PCDHA12	59
GO:0099003	vesicle-mediated transport in synapse	49/2412	221/18888	0.221719	1.73625	4.21239	6.86383e-05	0.00760588	0.00670336	CASK/NLGN2/ATP6AP2/NLGN4X/PFN2/WNT7A/ACTG1/NSG1/EFNB2/RAB3GAP1/ATP6V1F/ITSN1/PICALM/SNAP25/CPLX2/RAB3A/VAMP2/CDH2/CDK5R1/ATP6V1H/STON1/HPCA/SCRN1/SH3GL3/GRIP2/FCHO2/SH3GL1/CLCN3/FBXL20/ARC/SNAP91/VAMP4/FBXO45/GIT1/CANX/DNM1/CPLX1/PPP3CC/CSPG5/DVL1/SYN2/AMPH/ITSN2/BSN/SYNJ1/ATP6V1G2/TH/PREPL/SYT9	49
GO:0009100	glycoprotein metabolic process	76/2412	386/18888	0.196891	1.54182	4.11516	6.93311e-05	0.00760588	0.00670336	ALG13/ST8SIA4/TM9SF2/HS6ST2/GLCE/ST8SIA2/ITM2C/ST6GALNAC5/ST6GAL2/PLCB1/TMEM59/ST6GAL1/RAB1A/ST8SIA1/PHLDA1/TMEM258/KRTCAP2/IDS/ST6GALNAC3/COL2A1/HS6ST1/ADAMTS13/B4GAT1/ATP7A/POFUT2/EXT2/TET2/MAN2B1/EXTL2/GFPT1/CHPF/ST3GAL2/GALNT14/ST3GAL5/MOGS/SERP1/GMPPB/POMGNT2/MANBA/NCSTN/PXYLP1/FBXO17/TET1/EDEM3/PLOD3/ST3GAL1/TET3/ST3GAL6/MAN2A2/PCSK6/NUS1/ITM2B/B3GNT5/FBXO44/GOLGA2/XYLT1/HS3ST3B1/GALNT13/MG…	76
GO:1903050	regulation of proteolysis involved in protein catabolic process	50/2412	228/18888	0.219298	1.71729	4.16918	7.8163e-05	0.00841887	0.00741988	USP9X/PSMD10/HSPA1B/HSPA1A/BAG6/HECTD1/FBXW7/CAMLG/SOCS5/KEAP1/HIPK2/CBFA2T3/HSPBP1/TMF1/AGTPBP1/UBQLN2/GSK3B/BBS7/XPO1/TRIB1/GLMN/UBXN2A/N4BP1/SMAD7/EFNA1/USP38/ZYG11B/BCAP31/USP25/GSK3A/PINK1/COP1/PML/UCHL5/DVL1/TRIM67/DESI1/CSNK1D/PLK3/AXIN1/ARAF/L3MBTL3/DNAJB2/STYX/IL33/PSME3/SOCS4/AGBL4/UFL1/AQP11	50
GO:0006661	phosphatidylinositol biosynthetic process	33/2412	131/18888	0.251908	1.97266	4.27423	8.08158e-05	0.00854916	0.00753471	INPP5F/SOCS5/SOCS7/PIK3C2B/PIK3CA/PIGN/PIK3C3/INPP4A/PGAP1/SLC30A5/PI4KA/MTMR3/DGKE/INPP5K/PIGT/PIGX/PIK3R2/PITPNM2/PIGU/PGAP2/PIGF/CDIPT/SYNJ1/MBOAT7/PI4KB/SLC27A1/TMEM150A/IP6K1/EFR3A/PIGL/SACM1L/SOCS4/PIGG	33
GO:0070085	glycosylation	52/2412	241/18888	0.215768	1.68964	4.12261	8.86952e-05	0.00921807	0.00812425	ALG13/ST8SIA4/ST8SIA2/ST6GALNAC5/ST6GAL2/TMEM59/ST6GAL1/ST8SIA1/TMEM258/KRTCAP2/ST6GALNAC3/B4GAT1/POFUT2/EXT2/TET2/B4GALNT1/GFPT1/ST3GAL2/GALNT14/ST3GAL5/MOGS/SERP1/GMPPB/POMGNT2/TET1/EDEM3/PLOD3/ST3GAL1/TET3/ST3GAL6/MAN2A2/NUS1/B3GNT5/GOLGA2/GALNT13/MGAT5B/POGLUT1/COG6/MGAT4B/COG5/POGLUT2/COG7/ALG3/TMTC2/ALG11/TMEM165/GALNT9/SLC35C1/UGGT2/ST3GAL4/B3GALT1/AQP11	52
GO:0030705	cytoskeleton-dependent intracellular transport	45/2412	200/18888	0.225	1.76194	4.14475	9.25547e-05	0.00930386	0.00819985	HNRNPU/KIF1A/STAU2/STAU1/IFT81/KIF1B/IFT52/TERF2/SOD1/ARHGAP21/HTT/SPG7/IFT80/KIF3A/RAB1A/HSPB1/STK11/IFT46/HSBP1/TMEM108/TUB/CAMSAP3/DYNC1I1/AGTPBP1/IFT20/IFT122/SUN2/IFT88/SSNA1/KIFAP3/COPG1/TUBA1C/IFT172/ARL3/INTU/WASL/SYNE2/IFT27/KIF3B/HOOK3/PURA/LCA5/WDPCP/AGBL4/APBA1	45
GO:0034329	cell junction assembly	86/2412	453/18888	0.189845	1.48665	4.01134	9.26617e-05	0.00930386	0.00819985	NLGN2/ERBB4/ADGRL3/NLGN4X/VEGFA/WNT7A/EPHA7/PLXNB2/STAU2/ACTG1/LRRTM2/ST8SIA2/SPTBN2/JAM3/MDGA1/PCDHB14/EIF4G1/TJP1/PCDHB13/PRKCA/BCR/SDK2/CDH11/PCDHB11/SNAP25/PTPRD/SRC/GABRB3/CBLN2/CDH2/HIPK1/IL1RAPL2/GPM6B/SORBS1/PTPRO/SETD5/PKN2/CDH22/PCDHB16/IKBKB/ITGA6/GPM6A/LRP4/STON1/CAMSAP3/FER/PLEC/F11R/FERMT2/KIRREL3/JUP/GABRA2/VMP1/ROBO2/PTPN13/C1QL2/EPHA3/NTRK2/SMAD7/MPDZ/MEF2C/ZDHHC2/DUSP22/FBXO45/S…	86
GO:0001764	neuron migration	42/2412	183/18888	0.229508	1.79724	4.1465	9.75862e-05	0.00963501	0.00849171	USP9X/DCX/DDIT4/CHL1/PAX6/ADGRL3/VEGFA/ADGRG1/PLXNB2/SCRT2/MDGA1/NRP2/SEMA3A/NDNF/PLXNA3/KIF26A/NSMF/DAB1/NIPBL/PEX13/CDK5R1/GPM6A/SCRT1/KIRREL3/DCLK1/KIAA0319L/MATN2/NTRK2/PEX5/FGFR1/CDK5R2/POMGNT2/MEF2C/FBXO45/UNC5C/STAT3/FGF13/SPOCK1/CEP85L/CDKL5/FLNA/SDCCAG8	42
GO:0061136	regulation of proteasomal protein catabolic process	43/2412	189/18888	0.227513	1.78162	4.13202	0.000100312	0.00969945	0.0085485	USP9X/PSMD10/HSPA1B/HSPA1A/BAG6/HECTD1/FBXW7/CAMLG/SOCS5/KEAP1/CBFA2T3/HSPBP1/TMF1/UBQLN2/GSK3B/BBS7/XPO1/TRIB1/GLMN/UBXN2A/N4BP1/SMAD7/USP38/ZYG11B/BCAP31/USP25/GSK3A/PINK1/COP1/UCHL5/DVL1/DESI1/CSNK1D/PLK3/AXIN1/ARAF/DNAJB2/STYX/IL33/PSME3/SOCS4/UFL1/AQP11	43
GO:0046677	response to antibiotic	14/2412	37/18888	0.378378	2.96302	4.57302	0.000101513	0.00969945	0.0085485	JAK2/VPS54/KDM6B/KDM1A/SRD5A1/KDM5B/SLC1A3/JAK1/HYAL2/ATP7A/KAT7/MEF2C/CDKN1B/RSRC1	14
GO:0032456	endocytic recycling	25/2412	90/18888	0.277778	2.17523	4.27597	0.000108608	0.00989058	0.00871696	INPP5F/NSG1/HGS/SNX17/VPS13B/VPS52/VPS53/SNX4/RAB14/GRIP2/GRIP1/RAB8B/ZDHHC2/VAMP4/ANKRD50/STX6/SORL1/SNX7/VPS29/VPS39/ARHGAP1/EHD1/EHD3/VPS35L/BVES	25
GO:0006486	protein glycosylation	49/2412	225/18888	0.217778	1.70538	4.07259	0.000109853	0.00989058	0.00871696	ALG13/ST8SIA4/ST8SIA2/ST6GALNAC5/ST6GAL2/TMEM59/ST6GAL1/ST8SIA1/TMEM258/KRTCAP2/ST6GALNAC3/B4GAT1/POFUT2/EXT2/TET2/GFPT1/ST3GAL2/GALNT14/ST3GAL5/MOGS/SERP1/GMPPB/POMGNT2/TET1/EDEM3/PLOD3/ST3GAL1/TET3/ST3GAL6/MAN2A2/NUS1/B3GNT5/GOLGA2/GALNT13/MGAT5B/POGLUT1/MGAT4B/POGLUT2/COG7/ALG3/TMTC2/ALG11/TMEM165/GALNT9/SLC35C1/UGGT2/ST3GAL4/B3GALT1/AQP11	49
GO:0043413	macromolecule glycosylation	49/2412	225/18888	0.217778	1.70538	4.07259	0.000109853	0.00989058	0.00871696	ALG13/ST8SIA4/ST8SIA2/ST6GALNAC5/ST6GAL2/TMEM59/ST6GAL1/ST8SIA1/TMEM258/KRTCAP2/ST6GALNAC3/B4GAT1/POFUT2/EXT2/TET2/GFPT1/ST3GAL2/GALNT14/ST3GAL5/MOGS/SERP1/GMPPB/POMGNT2/TET1/EDEM3/PLOD3/ST3GAL1/TET3/ST3GAL6/MAN2A2/NUS1/B3GNT5/GOLGA2/GALNT13/MGAT5B/POGLUT1/MGAT4B/POGLUT2/COG7/ALG3/TMTC2/ALG11/TMEM165/GALNT9/SLC35C1/UGGT2/ST3GAL4/B3GALT1/AQP11	49
GO:0010976	positive regulation of neuron projection development	38/2412	161/18888	0.236025	1.84827	4.1358	0.000110349	0.00989058	0.00871696	IGF1R/PLXNB2/STAU2/NDNF/TMEM106B/ATP1B2/KIDINS220/KDM1A/NTRK3/BMP7/TMEM30A/ITGA6/SF3A2/PTN/CNR1/EPHA3/NTRK2/FGFR1/TOX/NCK1/PLPPR5/NCKIPSD/TENM3/NME2/DVL1/TRIM67/NPTN/CAPRIN2/DDX56/CNTN1/FKBP1B/EHD1/CUX2/KATNB1/STYXL1/FLNA/ROR2/AMIGO1	38
GO:0072666	establishment of protein localization to vacuole	20/2412	65/18888	0.307692	2.40949	4.35531	0.000112375	0.00989058	0.00871696	VPS54/VPS13C/HGS/CACNG7/VPS13A/VPS8/STAM/VPS53/VPS37D/CACNG4/STAM2/PIK3C3/VPS37B/VPS41/PXK/CACNG2/NCOA4/VPS4A/SORL1/VPS37A	20
GO:0032204	regulation of telomere maintenance	28/2412	106/18888	0.264151	2.06853	4.22096	0.000113531	0.00989058	0.00871696	HNRNPU/ATRX/HNRNPC/PKIB/TERF2/SRC/INO80E/HMBOX1/INO80B/TERF2IP/HDAC8/NSMCE4A/MAPKAPK5/INO80/MYC/PML/SLF1/PARP1/INO80C/UCHL5/SMC5/GNL3L/NEK7/POT1/TENT4B/NFRKB/FBXO4/INO80D	28
GO:0021543	pallium development	43/2412	191/18888	0.225131	1.76297	4.0549	0.000129135	0.0110869	0.00977131	IGF2BP1/PAX6/IGF1R/ADGRG1/MDGA1/NEUROD6/KDM6B/PLCB1/PLXNA3/KIF26A/KDM1A/CDH2/DAB1/FXR2/RARA/SRD5A1/CDON/PEX13/NF2/CDK5R1/TMEM108/UQCRQ/NPY/KIRREL3/GSK3B/SUN2/NTRK2/FXR1/PEX5/CDK5R2/BTG2/BTBD3/FBXO45/TBR1/SYNE2/FGF13/FAT4/KIF14/MBOAT7/PROX1/TH/FLNA/NF1	43
GO:0042176	regulation of protein catabolic process	71/2412	362/18888	0.196133	1.53588	3.93893	0.000133533	0.0113007	0.00995973	USP9X/PSMD10/HSPA1B/HSPA1A/BAG6/HECTD1/ITCH/TIMP2/TIMP3/NEDD4L/FBXW7/SOX9/CAMLG/SOCS5/HGS/AZIN1/TIMP1/TMEM132A/TSPAN5/KEAP1/CBFA2T3/HSPBP1/TMF1/FBXL5/STX5/CBLB/UBQLN2/GSK3B/NRDC/BBS7/XPO1/TRIB1/GLMN/UBXN2A/AZIN2/N4BP1/SMAD7/USP38/FBXL20/ZDHHC2/ZYG11B/BCAP31/CDKN1B/USP25/GSK3A/PINK1/COP1/SORL1/PSMD2/UCHL5/DVL1/ATRAID/DESI1/CSNK1D/PLK3/AXIN1/TRIM32/AMER1/TIPARP/ARAF/CYP51A1/IDE/DNAJB2/STYX/IL33/FLN…	71
GO:0097193	intrinsic apoptotic signaling pathway	64/2412	319/18888	0.200627	1.57108	3.93588	0.000143912	0.0120075	0.0105827	DDIT4/HSPA1A/BAG6/DDX3X/IVNS1ABP/JMY/JAK2/ATF2/PDK1/FBXW7/SOD1/HYOU1/SRC/ARL6IP5/KDM1A/TMEM161A/HIPK1/BCL2L1/SKIL/HSPB1/STK11/SELENOK/HTRA2/TRAP1/HIPK2/SERINC3/TNFRSF10B/BBC3/FBXO7/SFRP2/QRICH1/PIAS4/MCL1/BAD/NCK1/PMAIP1/BCAP31/TXNDC12/HRAS/XBP1/CASP9/PINK1/TMEM109/MYC/PML/SGPP1/URI1/PARP1/EDA2R/NFATC4/CDKN1A/USP47/TRIM32/FIS1/PHLDA3/PLAGL2/ERCC2/ACKR3/STYXL1/CEBPB/RRM2B/AIFM1/BCL2L11/USP28	64
GO:0007032	endosome organization	26/2412	97/18888	0.268041	2.09899	4.15192	0.000151723	0.0124834	0.0110022	ATP6AP2/ATP6V1F/HGS/TMEM127/ATP6V0B/TMCC1/PLEKHF2/ATP6V1H/VTA1/STAM/VPS37D/STAM2/VPS37B/CLCN3/VAMP4/PLEKHA3/STX6/DNM1/VPS4A/HOOK3/VPS37A/EEA1/SYNJ1/WASHC4/VPS33B/AQP11	26
GO:0090150	establishment of protein localization to membrane	57/2412	277/18888	0.205776	1.6114	3.92216	0.0001624	0.0131789	0.0116151	BAG6/SRP54/C2CD5/NSG1/TIMM8B/TOMM7/ARL6IP1/SRPRB/RAB3GAP1/SNAP25/CAMLG/TMCO1/SEC61G/VAMP2/TMEM147/TCAF1/KCNB1/SRPRA/ZDHHC6/CDK5R1/TIMM22/PKDCC/HPCA/VPS37D/BCS1L/VPS37B/OXA1L/GRIP2/GRIP1/RAB8B/WNK1/PEX5/ZDHHC2/SEC62/HRAS/CACNG2/EMC6/INPP5K/CPLX1/ATP1B1/CIB1/NECTIN3/SORL1/RAB10/MIEF2/SLC1A1/SEC61A2/VPS37A/TIMM8A/DMTN/TRAM1L1/FIS1/RAB3GAP2/COX18/PREPL/SGTB/AQP11	57
GO:0099504	synaptic vesicle cycle	44/2412	199/18888	0.221106	1.73144	3.96879	0.000167615	0.0134183	0.0118261	CASK/NLGN2/ATP6AP2/NLGN4X/PFN2/WNT7A/ACTG1/RAB3GAP1/ATP6V1F/ITSN1/PICALM/SNAP25/CPLX2/RAB3A/VAMP2/CDH2/CDK5R1/ATP6V1H/STON1/SCRN1/SH3GL3/FCHO2/SH3GL1/CLCN3/FBXL20/SNAP91/VAMP4/FBXO45/GIT1/CANX/DNM1/CPLX1/PPP3CC/CSPG5/DVL1/SYN2/AMPH/ITSN2/BSN/SYNJ1/ATP6V1G2/TH/PREPL/SYT9	44
GO:0032436	positive regulation of proteasomal ubiquitin-dependent protein catabolic process	22/2412	77/18888	0.285714	2.23738	4.16283	0.000176209	0.0138976	0.0122485	PSMD10/HSPA1B/HSPA1A/HECTD1/SOCS5/KEAP1/CBFA2T3/HSPBP1/GSK3B/BBS7/TRIB1/SMAD7/ZYG11B/GSK3A/COP1/DVL1/CSNK1D/PLK3/AXIN1/DNAJB2/IL33/SOCS4	22
GO:0007409	axonogenesis	85/2412	455/18888	0.186813	1.46291	3.82423	0.000178295	0.0138976	0.0122485	USP9X/PAK3/KALRN/CHL1/PAX6/IGF1R/BCL11B/VEGFA/VANGL2/NELL2/WNT7A/EPHA7/ANOS1/PLXNB2/ACTG1/EIF4G2/NRP2/EFNB2/L1CAM/SEMA3A/CDH11/PICALM/PLXNA3/SNAP25/SYNGAP1/RAB3A/IFRD1/PAK1/CDH2/DAB1/EFNB1/SKIL/PTPRO/STK11/BMP7/USP33/RAC3/CDK5R1/EPHA6/LRP4/SEMA6C/PTPRM/KLF7/SEMA7A/B4GAT1/NOVA2/DCLK1/ROBO2/EFNA3/C12orf57/GSK3B/NRDC/EPHA3/MATN2/SSNA1/IGSF9/NTRK2/ADAM17/DSCAML1/CDK5R2/EFNA1/NOG/MAP3K13/DRAXIN/NRXN3/…	85
GO:0050890	cognition	64/2412	322/18888	0.198758	1.55644	3.8533	0.000189636	0.0145897	0.0128585	CHL1/PAX6/NLGN4X/BRINP1/THRA/ATXN1/PLCB1/CAMK2N1/AMFR/PICALM/SNAP25/SYNGAP1/HTT/SRC/ARL6IP5/TMOD2/NIPBL/NEUROD2/ARF4/SETD5/INSR/CCND2/SPECC1/JPH3/CHRM1/IFT20/MAN2B1/SHISA7/PJA2/FOXO6/NTSR1/C12orf57/PTN/CNR1/CAMK4/NTRK2/GATM/BTG2/NOG/MEF2C/NCSTN/ARC/ATP8A1/PAK5/NRXN3/GIT1/TBR1/FGF13/SHANK3/NFATC4/ASIC1/NEDD9/SLC1A1/TAFA2/PTPRZ1/SYNJ1/CHRNA4/SLC1A4/CUX2/TH/AGER/NF1/ATP1A2/ST3GAL4	64
GO:0048168	regulation of neuronal synaptic plasticity	18/2412	58/18888	0.310345	2.43026	4.17397	0.000216056	0.0164092	0.014462	SYAP1/RAB3GAP1/SYNGAP1/RAB3A/NSMF/FXR2/JPH3/SHISA7/FXR1/NOG/ZDHHC2/ARC/HRAS/SHANK3/SYNGR1/NPTN/SHISA9/NF1	18
GO:0001508	action potential	35/2412	149/18888	0.234899	1.83946	3.93608	0.000222773	0.0167052	0.0147229	GNAQ/NEDD4L/SOD1/CACNA1C/KCNA5/AKAP6/KCNB1/CAMK2D/CALM3/TRPM4/CACNA1I/KCND3/JUP/CACNB3/SLC4A3/KCNJ3/KCNH2/CNR1/NTRK2/KCNIP2/SCN8A/ATP1A1/ATP1B1/FGF13/FGF12/KCNC2/KCNMB4/FKBP1B/CHRNA4/TMEM161B/CACNA2D1/FLNA/CACNA1D/ATP1A2/HCN2	35
GO:0031400	negative regulation of protein modification process	80/2412	426/18888	0.187793	1.47058	3.75876	0.000229411	0.0168259	0.0148293	INPP5F/GNAQ/PAX6/HSPA1B/BEX3/HSPA1A/IVNS1ABP/KIRREL1/IPO5/IBTK/PKIB/EIF4G1/INSM1/TSC2/CAMK2N1/CAMLG/SOCS5/NTRK3/HIPK3/IMPACT/TERF2IP/HSPB1/PTPRO/IKBKB/NF2/CALM3/PPM1E/HYAL2/HDAC8/CALM2/SFRP2/CBLB/MEN1/CAMK2N2/DUSP16/GSK3B/PTPN13/SPRY1/TRIB1/WNK1/N4BP1/SMAD7/AIDA/NCK1/PPP2CA/SPRY2/DUSP1/PAQR3/CDKN1B/DUSP22/ARRB2/INPP5K/THY1/CIB1/CRY2/DVL1/STK38/HEG1/PIBF1/MYADM/CDKN1A/BEX2/GPS2/FKBP8/GNL3L/ERRFI1/…	80
GO:0045666	positive regulation of neuron differentiation	25/2412	94/18888	0.265957	2.08267	4.0262	0.000230063	0.0168259	0.0148293	PAX6/TCF4/NBL1/BRINP1/EIF4G1/KDM4A/DAB1/IMPACT/RARA/NEUROD2/BMP7/CDON/MMD/BRINP2/SH3GL3/FGF2/FGFR1/ZEB1/MEF2C/MMD2/KCTD11/TRIM32/PROX1/NAP1L2/BCL6	25
GO:0035720	intraciliary anterograde transport	9/2412	19/18888	0.473684	3.70935	4.52076	0.000245809	0.017198	0.0151573	IFT81/IFT52/IFT80/IFT46/IFT20/IFT122/IFT88/IFT172/IFT27	9
GO:0034976	response to endoplasmic reticulum stress	55/2412	269/18888	0.204461	1.6011	3.79919	0.00024836	0.017198	0.0151573	HSPA1A/BAG6/DDX3X/JUN/EIF4G1/HM13/AMFR/HYOU1/TMCO1/BCL2L1/TMEM258/CCND1/SELENOK/SERINC3/TNFRSF10B/BBC3/UFM1/RPAP2/PARP16/QRICH1/SCAMP5/UBQLN2/PARP6/GSK3B/SERP1/UBXN2A/STC2/NCK1/PMAIP1/BCAP31/FBXO17/TXNDC12/HERPUD2/USP25/XBP1/EDEM3/ANKZF1/CANX/PML/FAM8A1/PIK3R2/FBXO44/DNAJB9/SESN2/MBTPS1/UBXN4/DNAJB2/TBL2/CEBPB/AIFM1/UGGT2/SGF29/UFL1/BCL2L11/AQP11	55
GO:0042073	intraciliary transport	16/2412	49/18888	0.326531	2.55701	4.17547	0.000249245	0.017198	0.0151573	IFT81/IFT52/IFT80/IFT46/TUB/IFT20/IFT122/IFT88/SSNA1/IFT172/ARL3/INTU/IFT27/KIF3B/LCA5/WDPCP	16
GO:0086001	cardiac muscle cell action potential	23/2412	84/18888	0.27381	2.14416	4.02111	0.000254038	0.017198	0.0151573	NEDD4L/CACNA1C/KCNA5/CAMK2D/CALM3/TRPM4/KCND3/JUP/SLC4A3/KCNJ3/KCNH2/KCNIP2/SCN8A/ATP1A1/ATP1B1/FGF13/FGF12/TMEM161B/CACNA2D1/FLNA/CACNA1D/ATP1A2/HCN2	23
GO:0018209	peptidyl-serine modification	59/2412	294/18888	0.20068	1.5715	3.77872	0.000254257	0.017198	0.0151573	INPP5F/RAF1/VEGFA/PFN2/SRPK2/PRKX/EIF4G1/PDK3/PRKCA/VRK1/NLK/PAK1/HIPK1/NTRK3/HIPK3/RICTOR/GRK2/PKN2/HIPK2/IKBKB/CDK5R1/CAMK2D/TLK1/SRPK1/SFRP2/NEK6/STK38L/GSK3B/AKT3/MAPKAPK5/CAMK4/NTRK2/WNK1/SMAD7/NCK1/SPRY2/MAP3K13/PAQR3/GSK3A/MAPK14/PINK1/INPP5K/MAPK12/STK38/CSNK1D/MAST1/GALNT13/MGAT5B/NEK7/AXIN1/DMTN/POGLUT1/ARAF/POGLUT2/TTBK2/PNCK/CSNK1G3/DYRK3/BAG4	59
GO:0048193	Golgi vesicle transport	59/2412	294/18888	0.20068	1.5715	3.77872	0.000254257	0.017198	0.0151573	TMED7/VPS54/HYOU1/VPS13C/HTT/COPE/ATP9B/RAB1A/VAMP2/SEC31A/TMEM115/ARF4/VPS52/VPS13A/USO1/TMED5/PKDCC/SCAMP1/STX5/TRAPPC4/KDELR1/RAB14/BET1/SEC24C/KDELR2/YIF1A/KLHL20/PGAP1/CORO7/RAB8B/GOSR2/COPB2/PREB/SEC24A/COPG1/BCAP31/TMED3/STX6/SCAMP3/ARL3/SORL1/INSIG1/RAB10/SNX2/SCFD1/GOLGA2/SEC24B/CSNK1D/COG6/COG5/COG7/PREPL/EHD3/VPS35L/STEAP2/SCAMP2/WHAMM/YIPF6/USE1	59
GO:0018205	peptidyl-lysine modification	35/2412	150/18888	0.233333	1.8272	3.89168	0.000255474	0.017198	0.0151573	NNAT/BAG6/UBA2/JMJD6/USPL1/ZNF451/KIAA1586/TRPM4/ATP7A/SETD3/PIAS4/NSMCE4A/KAT7/EEF1AKMT1/PLOD3/KMT5A/NFATC2IP/PML/SLF1/HDAC9/SIRT3/CBX4/EEF1AKMT3/SMC5/GNL3L/DESI1/P3H4/HDAC10/SENP2/P3H3/LOXL3/ATPSCKMT/ESCO1/VPS33B/KLF15	35
GO:0007212	dopamine receptor signaling pathway	14/2412	40/18888	0.35	2.7408	4.21686	0.000265868	0.0176966	0.0155967	GNAQ/NSG1/NSG2/GNG2/GNAL/RGS8/KLF16/GSK3B/NCSTN/GSK3A/ARRB2/SLC1A1/FLNA/ADCY5	14
GO:0060612	adipose tissue development	18/2412	59/18888	0.305085	2.38907	4.08866	0.000274206	0.0180489	0.0159072	ARRDC3/ATF2/VPS13B/PGRMC2/PIK3CA/NCOA2/SPTLC2/KLF7/TRPM4/COL6A1/ZNF516/HRAS/XBP1/PARP1/SORL1/ERRFI1/AMER1/ACAT1	18
GO:0007006	mitochondrial membrane organization	29/2412	117/18888	0.247863	1.94098	3.90637	0.000285975	0.0185116	0.016315	HSPA1A/TIMM8B/TMEM14A/ALKBH7/TMEM11/ATF2/TOMM7/HIP1R/TIMM50/SPG7/BCL2L1/IMMT/TIMM22/BCS1L/BAD/OXA1L/GSK3B/PEX5/PMAIP1/GSK3A/PINK1/GHITM/RTL10/TIMM8A/APOO/COX18/PPM1K/MICOS13/BCL2L11	29
GO:0051960	regulation of nervous system development	86/2412	468/18888	0.183761	1.439	3.6795	0.000288149	0.0185116	0.016315	NLGN2/QKI/PAX6/VEGFA/HES1/WNT7A/EPHA7/WASF3/PLXNB2/STAU2/BRINP1/HEY1/LRRTM2/ST8SIA2/EIF4G2/L1CAM/SEMA3A/PLXNA3/PTPRD/SYNGAP1/SS18L1/KDM4A/IFRD1/CBLN2/KDM1A/DAB1/FXR2/SPEN/SKIL/RARA/STK11/BMP7/CDON/BHLHE40/PLAG1/NF2/LRP4/SEMA6C/SEMA7A/RASSF10/FGF2/PARP6/ROBO2/PTN/PTPN13/NRDC/KIFAP3/HES5/NTRK2/JAM2/FXR1/APPL2/BTG2/NOG/MAP3K13/DRAXIN/ID2/S100A10/SLITRK3/THY1/SORL1/EPHB3/HES7/FGF13/SHANK3/SRRT/NFATC4…	86
GO:0048736	appendage development	41/2412	186/18888	0.22043	1.72615	3.8079	0.000293736	0.0185116	0.016315	SP8/ASPH/ATRX/WNT7A/VPS54/IFT52/IFT80/SOX9/CACNA1C/RPGRIP1L/NIPBL/LNPK/RARA/BMP7/FBXW4/ITGA6/LRP4/COL2A1/PKDCC/COL6A1/SFRP2/PIAS4/FERMT2/B4GALNT1/IFT122/BBS7/IQCE/FGFR1/NOG/ZBTB16/IFT172/INTU/LMBR1/RC3H2/SLC39A3/ERRFI1/CRABP2/FLVCR1/AFF3/WDPCP/BCL2L11	41
GO:0060173	limb development	41/2412	186/18888	0.22043	1.72615	3.8079	0.000293736	0.0185116	0.016315	SP8/ASPH/ATRX/WNT7A/VPS54/IFT52/IFT80/SOX9/CACNA1C/RPGRIP1L/NIPBL/LNPK/RARA/BMP7/FBXW4/ITGA6/LRP4/COL2A1/PKDCC/COL6A1/SFRP2/PIAS4/FERMT2/B4GALNT1/IFT122/BBS7/IQCE/FGFR1/NOG/ZBTB16/IFT172/INTU/LMBR1/RC3H2/SLC39A3/ERRFI1/CRABP2/FLVCR1/AFF3/WDPCP/BCL2L11	41
GO:0071214	cellular response to abiotic stimulus	65/2412	334/18888	0.194611	1.52397	3.6966	0.000313898	0.0193701	0.0170717	IGF1R/DDX3X/POLK/ZFP36L1/NMT2/SOX9/NLK/HSF1/NFAT5/NSMF/KDM1A/TIMP1/TMEM161A/NIPBL/BCL2L1/NEUROD2/STK11/SDE2/CCND2/PIK3CA/PIEZO2/TNFRSF10B/DDB2/PLEC/HYAL2/HPCA/F11R/SFRP2/BAD/FGF2/PDE2A/RHOB/WNK1/N4BP1/INO80/RDH11/NET1/HRAS/CASP9/MAPK14/TMEM109/MYC/TSPYL5/EFHD1/HABP4/PARP1/CRY2/NFATC4/WRN/CDKN1A/ASIC1/USP47/CNN2/IL33/WNK3/POLD1/POLD3/ATP1A2/INTS7/TRPV1/FBXO4/RAD1/SWI5/LRRC8D/USP28	65
GO:0104004	cellular response to environmental stimulus	65/2412	334/18888	0.194611	1.52397	3.6966	0.000313898	0.0193701	0.0170717	IGF1R/DDX3X/POLK/ZFP36L1/NMT2/SOX9/NLK/HSF1/NFAT5/NSMF/KDM1A/TIMP1/TMEM161A/NIPBL/BCL2L1/NEUROD2/STK11/SDE2/CCND2/PIK3CA/PIEZO2/TNFRSF10B/DDB2/PLEC/HYAL2/HPCA/F11R/SFRP2/BAD/FGF2/PDE2A/RHOB/WNK1/N4BP1/INO80/RDH11/NET1/HRAS/CASP9/MAPK14/TMEM109/MYC/TSPYL5/EFHD1/HABP4/PARP1/CRY2/NFATC4/WRN/CDKN1A/ASIC1/USP47/CNN2/IL33/WNK3/POLD1/POLD3/ATP1A2/INTS7/TRPV1/FBXO4/RAD1/SWI5/LRRC8D/USP28	65
GO:0046467	membrane lipid biosynthetic process	34/2412	146/18888	0.232877	1.82362	3.82244	0.000322848	0.0196962	0.017359	TLCD3B/ST8SIA4/TM9SF2/ST8SIA2/ST6GALNAC5/ST8SIA1/PIGN/ST6GALNAC3/ORMDL3/SPTLC2/PLA2G6/B4GALNT1/ST3GAL2/ST3GAL5/PGAP1/SLC30A5/ELOVL5/ST3GAL1/PIGT/ST3GAL6/PIGX/SPTSSA/SIRT3/ELOVL4/B3GNT5/PIGU/PGAP2/PIGF/SPNS2/UGT8/PIGL/ST3GAL4/B3GALT1/PIGG	34
GO:0007611	learning or memory	56/2412	278/18888	0.201439	1.57744	3.71106	0.000325832	0.0196962	0.017359	PAX6/NLGN4X/BRINP1/THRA/ATXN1/PLCB1/CAMK2N1/AMFR/PICALM/SNAP25/SYNGAP1/HTT/SRC/ARL6IP5/TMOD2/NEUROD2/ARF4/INSR/CCND2/SPECC1/JPH3/IFT20/MAN2B1/SHISA7/PJA2/FOXO6/NTSR1/PTN/CNR1/CAMK4/NTRK2/GATM/BTG2/NOG/MEF2C/NCSTN/ARC/ATP8A1/PAK5/NRXN3/GIT1/TBR1/FGF13/SHANK3/NFATC4/ASIC1/NEDD9/SLC1A1/TAFA2/PTPRZ1/SYNJ1/CUX2/TH/AGER/NF1/ATP1A2	56
GO:0048872	homeostasis of number of cells	63/2412	322/18888	0.195652	1.53212	3.68489	0.00033153	0.019787	0.017439	HSPA1B/VEGFA/ADGRG1/HSPA1A/KMT2E/TSC22D3/JAM3/JAK2/THRA/VPS54/TMEM14C/BCR/ACIN1/SOD1/ZFP36L1/SOX9/CAMLG/ZFX/CDH2/SKIL/JMJD6/ACVR1B/FH/HIPK2/SART3/RAC3/HSCB/BAP1/STAT5B/SOS2/COL6A1/SMAD5/AKT3/ADAM17/CITED2/F2R/PMAIP1/ARMCX1/PPP2CA/SMAP1/MEF2C/NCSTN/ID2/MAPK14/STAT3/WDR48/FAM210B/INHA/PACS1/RC3H2/SLC39A3/FLVCR1/DMTN/ERCC2/CHST3/L3MBTL3/SPNS2/RC3H1/NF1/BCL6/DYRK3/UFL1/BCL2L11	63
GO:0001558	regulation of cell growth	78/2412	418/18888	0.186603	1.46126	3.64874	0.000334014	0.019787	0.017439	PSMD10/RBBP7/HSPA1B/VEGFA/HSPA1A/DDX3X/EPHA7/ING4/EIF4G2/ITCH/JADE1/L1CAM/EIF4G1/SEMA3A/ADAM10/NEDD4L/PLXNA3/KIF26A/CPNE6/CACNG7/IFRD1/ST7L/RICTOR/STK11/AKAP6/SERTAD2/ACVR1B/BTG1/HDGFL2/CAMK2D/JADE3/BAP1/SEMA6C/HYAL2/SEMA7A/SFRP2/KAT7/FXN/GSK3B/ING1/FHL1/ADAM17/SMAD7/PPP2CA/MAP3K13/INO80/MEAF6/NET1/DRAXIN/CDKN1B/PAK5/GSK3A/ADAM15/PML/CIB1/URI1/FRZB/FGF13/ITSN2/SPOCK1/CDKN1A/LAMTOR2/OSGIN2/USP47/S…	78
GO:0042326	negative regulation of phosphorylation	62/2412	316/18888	0.196203	1.53643	3.67937	0.000340404	0.0199659	0.0175967	INPP5F/GNAQ/HNRNPU/PAX6/KIRREL1/IPO5/IBTK/PKIB/EIF4G1/INSM1/TSC2/CAMK2N1/SOCS5/NTRK3/HIPK3/IMPACT/TERF2IP/HSPB1/PTPRO/NF2/CALM3/PPM1E/HYAL2/CALM2/SFRP2/CBLB/MEN1/CAMK2N2/DUSP16/PTPN13/SPRY1/TRIB1/SMAD7/AIDA/NCK1/PPP2CA/SPRY2/DUSP1/PAQR3/CDKN1B/DUSP22/ARRB2/INPP5K/THY1/CIB1/DVL1/STK38/HEG1/PIBF1/INHA/MYADM/CDKN1A/FKBP8/ERRFI1/PRDX3/DMTN/SPRED1/TFAP4/NPRL2/NF1/TESK1/SOCS4	62
GO:0030575	nuclear body organization	8/2412	16/18888	0.5	3.91542	4.46372	0.000346644	0.020049	0.01767	SRPK2/SERBP1/USPL1/HIPK2/WRAP53/PML/HABP4/DYRK3	8
GO:0019082	viral protein processing	12/2412	32/18888	0.375	2.93657	4.19495	0.00034859	0.020049	0.01767	ST6GAL1/SPCS3/ST6GALNAC3/PARP16/ST3GAL2/GSK3B/MOGS/GSK3A/ST3GAL1/CANX/MGAT4B/ST3GAL4	12
GO:0009081	branched-chain amino acid metabolic process	11/2412	28/18888	0.392857	3.0764	4.20692	0.00038334	0.0216277	0.0190613	AUH/IVD/PCCA/ILVBL/BCKDHA/BCKDK/HSD17B10/HMGCL/PPM1K/HIBADH/ACAT1	11
GO:0071577	zinc ion transmembrane transport	11/2412	28/18888	0.392857	3.0764	4.20692	0.00038334	0.0216277	0.0190613	SLC30A7/SLC39A10/SLC39A6/SLC39A7/SLC30A5/SLC30A9/SLC30A4/SLC39A3/SLC39A13/SLC1A1/SLC30A6	11
GO:0006607	NLS-bearing protein import into nucleus	9/2412	20/18888	0.45	3.52388	4.32081	0.000396433	0.0221554	0.0195264	KPNA5/IPO5/KPNB1/KPNA3/KPNA1/CBLB/KPNA4/KPNA6/KPNA2	9
GO:0097150	neuronal stem cell population maintenance	10/2412	24/18888	0.416667	3.26285	4.24414	0.00040344	0.0223363	0.0196858	IGF2BP1/HES1/CDH2/MMP24/JAG1/HES5/FANCD2/SRRT/HOOK3/PROX1	10
GO:0048013	ephrin receptor signaling pathway	16/2412	51/18888	0.313725	2.45674	3.9857	0.000416145	0.0228263	0.0201178	PAK3/KALRN/RASA1/EPHA7/EFNB2/SRC/PAK1/EFNB1/CDK5R1/EPHA6/EFNA3/EPHA3/NCK1/EFNA1/GIT1/EPHB3	16
GO:0099175	regulation of postsynapse organization	26/2412	103/18888	0.252427	1.97672	3.803	0.000425693	0.0231358	0.0203905	PAK3/KIF1A/WNT7A/EPHA7/STAU2/LRRTM2/NRP2/ADAM10/PTPRD/ABHD17B/CDH2/ARF4/HOMER1/CDK5R1/EFNA1/ARC/GRID1/WASL/DVL1/SHANK3/NEDD9/CAPRIN2/CUX2/CDKL5/NF1/ROR2	26
GO:0010506	regulation of autophagy	68/2412	357/18888	0.190476	1.49159	3.58783	0.000434491	0.0233993	0.0206227	CDK16/EIF4G2/EIF4G1/RAB3GAP1/TSC2/FBXW7/KAT8/VPS13C/ATG12/HTT/KDM4A/TMEM59/SREBF2/ATP6V0B/HSPB1/STK11/LARP1/VPS26B/HTRA2/FBXL2/USP33/KEAP1/CDK5R1/ATP6V1H/PIK3CA/ORMDL3/RB1CC1/SPTLC2/FBXO7/HERC1/UBQLN2/MCL1/BAD/PIK3C3/RAB39B/SNX4/USP10/HAX1/STK38L/GSK3B/FOXK1/TRIM23/WNK1/MTMR3/TECPR1/GSK3A/PINK1/DRAM2/STAT3/SNX7/USP20/PIK3R2/TFEB/SCFD1/FKBP8/GOLGA2/PHF23/SESN2/PLK3/TRIM32/ATP6V1G2/RAB3GAP2/MID2/NP…	68
GO:0010721	negative regulation of cell development	57/2412	288/18888	0.197917	1.54985	3.59776	0.000461096	0.0246084	0.0216883	PAX6/VEGFA/HES1/WNT7A/EPHA7/TMEM131L/BRINP1/SEMA3A/FBXW7/NRARP/PLXNA3/SYNGAP1/KDM4A/SOCS5/IFRD1/DAB1/RARA/BMP7/NF2/LRP4/SEMA6C/ZBTB46/FBXO7/SEMA7A/HMGB3/PTN/GSK3B/KIFAP3/TRIB1/HES5/SMAD7/APPL2/BTG2/NOG/DRAXIN/GSK3A/ID2/MYC/THY1/SORL1/NME2/FRZB/INHA/FGF13/RC3H2/NFATC4/HOOK3/PROX1/PRTG/IL17D/LOXL3/RC3H1/NF1/BCL6/GPR137B/TRPV1/NR1D1	57
GO:2000278	regulation of DNA biosynthetic process	28/2412	115/18888	0.243478	1.90664	3.73131	0.000492434	0.0260463	0.0229556	HNRNPU/ING4/HNRNPC/DACH1/PKIB/JADE1/TERF2/SRC/HMBOX1/JADE3/POLG2/KAT7/MEN1/FGF2/WRAP53/MAPKAPK5/SH2B1/MEAF6/MYC/NFATC1/CDKN1A/GNL3L/NEK7/POT1/TENT4B/USP1/ING5/FBXO4	28
GO:0006606	protein import into nucleus	36/2412	161/18888	0.223602	1.751	3.66152	0.000501846	0.0263091	0.0231873	PHB2/KPNA5/IPO5/KPNB1/JAK2/ATF2/TSC2/KPNA3/TXNIP/RPAIN/KPNA1/UFM1/HYAL2/CBLB/KPNA4/JUP/EFCAB7/KPNA6/ING1/APPL2/CSE1L/RANBP17/MAPK14/PML/CRY2/POM121/STAT3/IPO13/CDKN1A/PIK3R2/UBR5/IL33/FLNA/NF1/RBM22/KPNA2	36
GO:0006282	regulation of DNA repair	45/2412	215/18888	0.209302	1.63901	3.60551	0.000514768	0.0267499	0.0235757	VPS72/RADX/TERF2/KMT5C/INO80E/HSF1/INO80B/KDM1A/TMEM161A/SF3B5/TERF2IP/ACTL6B/HDGFL2/MRNIP/KMT5B/MBTD1/PIAS4/KAT7/WRAP53/HMGA2/INO80/MEAF6/ERCC8/KMT5A/PML/SLF1/PARP1/RECQL5/INO80C/UCHL5/WDR48/SMCHD1/CBX8/POT1/DPF3/HDAC10/ATXN7L3/NFRKB/USP1/SUPT3H/RIF1/NPAS2/TADA2B/SGF29/INO80D	45
GO:0071560	cellular response to transforming growth factor beta stimulus	59/2412	302/18888	0.195364	1.52987	3.55158	0.000522879	0.0269034	0.023711	USP9X/RBBP7/IGF1R/HSPA1A/WNT7A/JUN/ZFP36L1/SOX9/NLK/ITGB8/SRC/VEPH1/SKIL/SAP30L/ACVR1/STK11/ZNF451/HIPK2/PMEPA1/HYAL2/FERMT2/MEN1/SMAD1/PDE2A/STK16/IL17RD/SMAD5/DKK3/SPRY1/ING1/SMURF2/ADAM17/SMAD7/APPL2/CITED2/LTBP1/SPRY2/ZEB1/MEF2C/TET1/SOX6/STRAP/DUSP22/PML/ARRB2/LEMD3/SMAD9/PARP1/STAT3/ZEB2/NFATC1/SINHCAF/TWSG1/AXIN1/BCL9L/SPRED1/COL4A2/ITGB5/HTRA1	59
GO:0072665	protein localization to vacuole	23/2412	88/18888	0.261364	2.0467	3.76555	0.000526806	0.0269034	0.023711	VPS54/VPS13C/HGS/CACNG7/LAMTOR5/VPS13A/VPS8/STAM/VPS53/VPS37D/CACNG4/STAM2/PIK3C3/VPS37B/VPS41/PXK/CACNG2/NCOA4/VPS4A/SORL1/VPS37A/MEAK7/GPR137B	23
GO:0001933	negative regulation of protein phosphorylation	58/2412	296/18888	0.195946	1.53442	3.54578	0.000537062	0.0271392	0.0239188	INPP5F/GNAQ/PAX6/KIRREL1/IPO5/IBTK/PKIB/EIF4G1/INSM1/TSC2/CAMK2N1/SOCS5/NTRK3/HIPK3/IMPACT/TERF2IP/HSPB1/PTPRO/NF2/CALM3/PPM1E/HYAL2/CALM2/SFRP2/CBLB/MEN1/CAMK2N2/DUSP16/PTPN13/SPRY1/TRIB1/SMAD7/AIDA/NCK1/PPP2CA/SPRY2/DUSP1/PAQR3/CDKN1B/DUSP22/ARRB2/INPP5K/THY1/CIB1/DVL1/STK38/HEG1/PIBF1/MYADM/CDKN1A/FKBP8/ERRFI1/DMTN/SPRED1/TFAP4/NF1/TESK1/SOCS4	58
GO:0061337	cardiac conduction	25/2412	99/18888	0.252525	1.97749	3.73096	0.000540631	0.0271392	0.0239188	ATP1B2/SRC/CACNA1C/KCNA5/CAMK2D/CALM3/TRPM4/MEF2A/CALM2/KCND3/JUP/SLC4A3/KCNJ3/ATP1A3/KCNH2/ATP1A1/ATP1B1/FKBP1B/TRPC1/CACNA2D1/EHD3/FLNA/CACNA1D/ATP1A2/ATP2B2	25
GO:0006829	zinc ion transport	11/2412	29/18888	0.37931	2.97032	4.06276	0.000546839	0.0271392	0.0239188	SLC30A7/SLC39A10/SLC39A6/SLC39A7/SLC30A5/SLC30A9/SLC30A4/SLC39A3/SLC39A13/SLC1A1/SLC30A6	11
GO:0016311	dephosphorylation	60/2412	309/18888	0.194175	1.52055	3.53002	0.000554328	0.0271392	0.0239188	INPP5F/PPP6R2/TIMM50/PTPRD/HTT/SBF1/SRC/SSH1/NSMF/PTPN12/PTPRO/STK11/THNSL2/IKBKB/PPP2R2A/CALM3/PTPRM/PPM1E/PTPRU/CALM2/PLPP5/PTPRG/DUSP16/GSK3B/PTPN13/PPM1B/PLPPR2/NCK1/PPP2CA/DUSP1/MTMR3/MEF2C/PXYLP1/PLPPR5/HDHD2/DUSP22/CAMTA1/PGAM5/PINK1/INPP5K/SGPP1/PPP3CC/URI1/SPPL3/CRY2/DUSP8/PTPRZ1/SYNJ1/FKBP1B/DUSP15/IGBP1/INPP5B/PPM1K/STYX/STYXL1/PPP4R4/ENSA/SACM1L/PLPP6/NANP	60
GO:0071559	response to transforming growth factor beta	60/2412	309/18888	0.194175	1.52055	3.53002	0.000554328	0.0271392	0.0239188	USP9X/RBBP7/IGF1R/HSPA1A/WNT7A/JUN/ZFP36L1/SOX9/NLK/ITGB8/SRC/VEPH1/SKIL/SAP30L/ACVR1/STK11/FNDC4/ZNF451/HIPK2/PMEPA1/HYAL2/FERMT2/MEN1/SMAD1/PDE2A/STK16/IL17RD/SMAD5/DKK3/SPRY1/ING1/SMURF2/ADAM17/SMAD7/APPL2/CITED2/LTBP1/SPRY2/ZEB1/MEF2C/TET1/SOX6/STRAP/DUSP22/PML/ARRB2/LEMD3/SMAD9/PARP1/STAT3/ZEB2/NFATC1/SINHCAF/TWSG1/AXIN1/BCL9L/SPRED1/COL4A2/ITGB5/HTRA1	60
GO:0048167	regulation of synaptic plasticity	45/2412	216/18888	0.208333	1.63143	3.57107	0.000571345	0.0276082	0.0243322	CHRDL1/SYAP1/STAU2/STAU1/NSG1/CALB2/LRRTM2/RAB3GAP1/SNAP25/SYNGAP1/SSH1/CPLX2/RAB3A/VAMP2/NSMF/SLC38A1/FXR2/RARA/NEUROD2/KCNB1/JPH3/SCGN/SHISA7/PTN/GSK3B/NTRK2/PDE9A/FXR1/IGSF11/NOG/C22orf39/MEF2C/ZDHHC2/NCSTN/ARC/HRAS/SHANK3/NFATC4/SYNGR1/SLC1A1/NPTN/SHISA9/AGER/NF1/TSHZ3	45
GO:0001574	ganglioside biosynthetic process	8/2412	17/18888	0.470588	3.6851	4.23772	0.000581651	0.0276082	0.0243322	ST8SIA4/ST8SIA2/ST6GALNAC5/ST6GALNAC3/B4GALNT1/ST3GAL2/ST3GAL5/ST3GAL1	8
GO:0060382	regulation of DNA strand elongation	8/2412	17/18888	0.470588	3.6851	4.23772	0.000581651	0.0276082	0.0243322	INO80E/INO80B/INO80/INO80C/UCHL5/POT1/NFRKB/INO80D	8
GO:0050767	regulation of neurogenesis	73/2412	393/18888	0.185751	1.45458	3.4844	0.00058255	0.0276082	0.0243322	QKI/PAX6/VEGFA/HES1/WNT7A/EPHA7/PLXNB2/STAU2/BRINP1/HEY1/EIF4G2/L1CAM/SEMA3A/PLXNA3/PTPRD/SYNGAP1/SS18L1/KDM4A/IFRD1/KDM1A/DAB1/FXR2/SPEN/SKIL/STK11/BMP7/CDON/BHLHE40/PLAG1/NF2/LRP4/SEMA6C/SEMA7A/RASSF10/FGF2/PARP6/ROBO2/PTN/NRDC/KIFAP3/HES5/NTRK2/FXR1/APPL2/BTG2/NOG/MAP3K13/DRAXIN/ID2/S100A10/THY1/SORL1/HES7/FGF13/SHANK3/SRRT/NFATC4/HOOK3/NPTN/CAPRIN2/PTPRZ1/CRABP2/TRIM32/CUX2/PROX1/PRTG/IL33/CD…	73
GO:0086064	cell communication by electrical coupling involved in cardiac conduction	10/2412	25/18888	0.4	3.13234	4.08192	0.00059591	0.0280172	0.0246927	ATP1B2/CACNA1C/CAMK2D/CALM3/CALM2/ATP1A3/ATP1A1/ATP1B1/FKBP1B/ATP1A2	10
GO:0030111	regulation of Wnt signaling pathway	65/2412	342/18888	0.190058	1.48832	3.48687	0.00060955	0.0284329	0.025059	ATP6AP2/GNAQ/TLE1/DDX3X/TMEM131L/TBL1X/JADE1/AMER2/TSC2/NRARP/AMFR/IFT80/SOX9/NLK/SRC/SHISA2/JRK/CDH2/WLS/TMEM132A/PTPRO/STK11/HMGXB4/SIAH2/CXXC4/KPNA1/LRP4/PTPRU/TRPM4/SFRP2/IFT20/HECW1/FZD7/JUP/FRAT1/FGF2/DKK3/GSK3B/PPM1B/SMURF2/WNK1/USP34/NOG/PPP2CA/TAX1BP3/DRAXIN/TLE2/GSK3A/TMEM198/MAPK14/AMER3/CTNND1/ZEB2/FRZB/NFATC4/USP47/CAPRIN2/UBR5/CSNK1D/AXIN1/AMER1/SENP2/CSNK1G3/TMEM88/KLF15	65
GO:0098876	vesicle-mediated transport to the plasma membrane	34/2412	151/18888	0.225166	1.76324	3.60282	0.000620218	0.0287045	0.0252984	INPP5F/NSG1/SNAP25/HGS/VAMP2/SNX17/VPS13B/VPS52/PKDCC/VPS53/SNX4/RAB14/GRIP2/GRIP1/RAB8B/ZDHHC2/VAMP4/ANKRD50/STX6/ARL3/CPLX1/SORL1/SNX7/RAB10/VPS29/VPS39/SLC1A1/ARHGAP1/EHD1/PREPL/EHD3/VPS35L/STEAP2/BVES	34
GO:0008593	regulation of Notch signaling pathway	25/2412	100/18888	0.25	1.95771	3.674	0.000634812	0.0291521	0.0256929	HES1/HEY1/ADAM10/FBXW7/NRARP/SRC/TM2D3/SREBF2/TSPAN5/BMP7/TCIM/JAG1/ROBO2/ENHO/HES5/ARRDC1/LFNG/STAT3/POGLUT1/HIF1AN/MFNG/JAG2/BCL6/SLC35C1/RITA1	25
GO:0006623	protein targeting to vacuole	15/2412	48/18888	0.3125	2.44714	3.84092	0.000654336	0.0296932	0.0261698	VPS54/VPS13C/HGS/VPS13A/VPS8/VPS53/VPS37D/PIK3C3/VPS37B/VPS41/PXK/NCOA4/VPS4A/SORL1/VPS37A	15
GO:0062197	cellular response to chemical stress	60/2412	311/18888	0.192926	1.51077	3.47509	0.00065662	0.0296932	0.0261698	HSPA1B/HSPA1A/DDX3X/STAU2/STAU1/ATF2/JUN/HM13/KDM6B/SOD1/ZFP36L1/NLK/SRC/ARL6IP5/HSF1/NFAT5/TMEM161A/BMP7/HTRA2/KEAP1/TRAP1/PEX13/PIK3CA/PCGF2/FER/PLEC/IL18BP/ATP7A/FXN/NUDT2/BAD/RHOB/PNPLA8/WNK1/PEX5/SELENON/NET1/PEX2/ANKZF1/PINK1/SMPD3/EFHD1/PARP1/PEX10/FANCD2/OSER1/NME2/BRF2/SRXN1/SLC1A1/CBX8/SESN2/PRDX3/MEAK7/PAWR/ZNF277/WNK3/AIFM1/PLEKHA1/LRRC8D	60
GO:0090313	regulation of protein targeting to membrane	12/2412	34/18888	0.352941	2.76383	3.93857	0.000662709	0.0297416	0.0262124	C2CD5/TCAF1/KCNB1/CDK5R1/HPCA/HRAS/INPP5K/CIB1/MIEF2/SLC1A1/DMTN/FIS1	12
GO:0086065	cell communication involved in cardiac conduction	17/2412	58/18888	0.293103	2.29525	3.77995	0.000673245	0.0299872	0.0264289	ATP1B2/CACNA1C/KCNA5/CAMK2D/CALM3/TRPM4/CALM2/JUP/KCNJ3/ATP1A3/ATP1A1/ATP1B1/FKBP1B/CACNA2D1/FLNA/CACNA1D/ATP1A2	17
GO:0030902	hindbrain development	35/2412	158/18888	0.221519	1.73468	3.54816	0.000713426	0.0315398	0.0277973	PAX6/IGF1R/NLGN4X/HES1/WNT7A/SPTBN2/ATF2/ATP1B2/RPGRIP1L/DAB1/WLS/NEUROD2/BMP7/OTX1/CDK5R1/AGTPBP1/ATP7A/UQCRQ/HERC1/FGF2/SMAD1/KNDC1/CDK5R2/ABAT/NOG/NCSTN/TBR1/TRNP1/KIF14/SEC24B/CNTN1/PROX1/TTBK2/PDSS2/FLNA	35
GO:0030258	lipid modification	41/2412	194/18888	0.21134	1.65497	3.50846	0.000727161	0.0317331	0.0279676	INPP5F/KLHL25/SOX9/AUH/PEX13/IVD/HSD17B4/ILVBL/ACADM/PLPP5/B4GALNT1/ST3GAL2/CNR1/LONP2/PEX5/PLPPR2/APPL2/MTMR3/DGKE/PLPPR5/PEX2/ECI2/MAPK14/ACADVL/INPP5K/SGPP1/SESN2/SYNJ1/HSD17B10/CYP2E1/PHYH/MBOAT7/INPP5B/TYSND1/ADH5/SACM1L/ACAT1/PLPP6/SLC35C1/ST3GAL4/B3GALT1	41
GO:0060828	regulation of canonical Wnt signaling pathway	53/2412	268/18888	0.197761	1.54864	3.46104	0.000728511	0.0317331	0.0279676	ATP6AP2/GNAQ/TLE1/DDX3X/TMEM131L/TBL1X/JADE1/AMER2/NRARP/AMFR/SOX9/SRC/JRK/CDH2/WLS/PTPRO/STK11/SIAH2/KPNA1/LRP4/PTPRU/TRPM4/SFRP2/IFT20/HECW1/FZD7/JUP/FRAT1/FGF2/DKK3/GSK3B/PPM1B/SMURF2/WNK1/USP34/NOG/DRAXIN/TLE2/GSK3A/TMEM198/MAPK14/AMER3/CTNND1/ZEB2/FRZB/USP47/CAPRIN2/UBR5/CSNK1D/AXIN1/AMER1/CSNK1G3/TMEM88	53
GO:0034067	protein localization to Golgi apparatus	11/2412	30/18888	0.366667	2.87131	3.92467	0.000764618	0.0328232	0.0289284	VPS13C/VPS13A/ARL5B/ARL5A/IFT20/ARL1/PAQR3/SORL1/PACS1/CSNK1D/COG7	11
GO:1901021	positive regulation of calcium ion transmembrane transporter activity	11/2412	30/18888	0.366667	2.87131	3.92467	0.000764618	0.0328232	0.0289284	HTT/STIM1/AKAP6/STIM2/CALM3/CALM2/STIMATE/CACNB3/VMP1/ATP1B1/CACNA2D1	11
GO:1903539	protein localization to postsynaptic membrane	14/2412	44/18888	0.318182	2.49163	3.79006	0.000803045	0.0341422	0.0300908	ERBB4/NSG1/ADAM10/SNAP25/CACNG7/NETO2/GRIP2/GRIP1/C1QL2/ZDHHC2/HRAS/CACNG2/CPLX1/LGI1	14
GO:0018107	peptidyl-threonine phosphorylation	24/2412	96/18888	0.25	1.95771	3.59938	0.000806871	0.0341422	0.0300908	ATF2/EIF4G1/PRKCA/NLK/HIPK1/HIPK3/STK11/ACVR1B/HIPK2/CDK5R1/CAMK2D/CALM3/CALM2/GSK3B/WNK1/SMAD7/SPRY2/GSK3A/INPP5K/AXIN1/DMTN/SPRED1/WNK3/DYRK3	24
GO:0007219	Notch signaling pathway	39/2412	183/18888	0.213115	1.66887	3.47882	0.000816684	0.0343123	0.0302408	HES1/HEY1/ADAM10/FBXW7/NRARP/SOX9/SRC/TM2D3/SREBF2/KCNA5/SPEN/TSPAN5/BMP7/DTX4/TCIM/SORBS2/JAG1/ROBO2/GRIP2/ENHO/HES5/ARRDC1/ADAM17/NCSTN/MIB1/CDKN1B/LFNG/IFT172/STAT3/HES7/NKAP/CNTN1/POGLUT1/HIF1AN/MFNG/JAG2/BCL6/SLC35C1/RITA1	39
GO:0018105	peptidyl-serine phosphorylation	55/2412	282/18888	0.195035	1.52729	3.41345	0.000825435	0.03435	0.030274	INPP5F/RAF1/VEGFA/PFN2/SRPK2/PRKX/EIF4G1/PDK3/PRKCA/VRK1/NLK/PAK1/HIPK1/NTRK3/HIPK3/RICTOR/GRK2/PKN2/HIPK2/IKBKB/CDK5R1/CAMK2D/TLK1/SRPK1/SFRP2/NEK6/STK38L/GSK3B/AKT3/MAPKAPK5/CAMK4/NTRK2/WNK1/SMAD7/NCK1/SPRY2/MAP3K13/PAQR3/GSK3A/MAPK14/PINK1/INPP5K/MAPK12/STK38/CSNK1D/MAST1/NEK7/AXIN1/DMTN/ARAF/TTBK2/PNCK/CSNK1G3/DYRK3/BAG4	55
GO:0006241	CTP biosynthetic process	7/2412	14/18888	0.5	3.91542	4.17521	0.000829179	0.03435	0.030274	CTPS2/UCKL1/NME7/UCK2/NME2/UCK1/NME3	7
GO:0048596	embryonic camera-type eye morphogenesis	10/2412	26/18888	0.384615	3.01186	3.92768	0.000858349	0.0353115	0.0311214	PAX6/HIPK1/BMP7/HIPK2/PHACTR4/CITED2/ZEB1/IFT172/PROX1/TH	10
GO:0051170	import into nucleus	36/2412	166/18888	0.216867	1.69826	3.4573	0.000911252	0.0372294	0.0328117	PHB2/KPNA5/IPO5/KPNB1/JAK2/ATF2/TSC2/KPNA3/TXNIP/RPAIN/KPNA1/UFM1/HYAL2/CBLB/KPNA4/JUP/EFCAB7/KPNA6/ING1/APPL2/CSE1L/RANBP17/MAPK14/PML/CRY2/POM121/STAT3/IPO13/CDKN1A/PIK3R2/UBR5/IL33/FLNA/NF1/RBM22/KPNA2	36
GO:0060291	long-term synaptic potentiation	26/2412	108/18888	0.240741	1.8852	3.52981	0.000920466	0.037249	0.032829	STAU1/NSG1/CALB2/LRRTM2/SNAP25/VAMP2/SCGN/SHISA7/PTN/GSK3B/NTRK2/PDE9A/FXR1/IGSF11/NOG/C22orf39/ZDHHC2/NCSTN/ARC/SHANK3/NFATC4/SLC1A1/NPTN/AGER/NF1/TSHZ3	26
GO:0009083	branched-chain amino acid catabolic process	9/2412	22/18888	0.409091	3.20353	3.95671	0.000924309	0.037249	0.032829	AUH/IVD/BCKDHA/BCKDK/HSD17B10/HMGCL/PPM1K/HIBADH/ACAT1	9
GO:1903052	positive regulation of proteolysis involved in protein catabolic process	30/2412	131/18888	0.229008	1.79332	3.48617	0.000941532	0.0376867	0.0332148	PSMD10/HSPA1B/HSPA1A/BAG6/HECTD1/FBXW7/SOCS5/KEAP1/CBFA2T3/HSPBP1/AGTPBP1/UBQLN2/GSK3B/BBS7/TRIB1/SMAD7/ZYG11B/BCAP31/GSK3A/COP1/DVL1/TRIM67/CSNK1D/PLK3/AXIN1/L3MBTL3/DNAJB2/IL33/SOCS4/AGBL4	30
GO:0071479	cellular response to ionizing radiation	19/2412	70/18888	0.271429	2.12552	3.60959	0.000951389	0.0378257	0.0333373	HSF1/KDM1A/NIPBL/BCL2L1/CCND2/SFRP2/RHOB/INO80/NET1/HRAS/MAPK14/TMEM109/TSPYL5/WRN/CDKN1A/INTS7/FBXO4/RAD1/SWI5	19
GO:0010821	regulation of mitochondrion organization	33/2412	149/18888	0.221477	1.73435	3.44323	0.000999891	0.0390466	0.0344133	PSMD10/HSPA1A/TMEM14A/TSC2/FBXW7/HIP1R/VPS13C/HTT/SREBF2/STAT2/BCL2L1/HUWE1/HTRA2/ZDHHC6/TMEM135/BBC3/FBXO7/FXN/BAD/PDE2A/HAX1/GSK3B/SLC30A9/PMAIP1/GSK3A/PGAM5/PINK1/GHITM/PLSCR3/MIEF2/FKBP8/FIS1/BCL2L11	33
GO:0007411	axon guidance	47/2412	234/18888	0.200855	1.57286	3.37378	0.00100281	0.0390466	0.0344133	KALRN/CHL1/PAX6/BCL11B/VEGFA/VANGL2/NELL2/EPHA7/ANOS1/NRP2/EFNB2/L1CAM/SEMA3A/PLXNA3/EFNB1/PTPRO/BMP7/USP33/RAC3/CDK5R1/EPHA6/SEMA6C/PTPRM/KLF7/SEMA7A/B4GAT1/NOVA2/ROBO2/EFNA3/EPHA3/MATN2/IGSF9/ADAM17/DSCAML1/CDK5R2/EFNA1/NOG/DRAXIN/NRXN3/UNC5C/TBR1/TRIO/DVL1/EPHB3/CNTN1/VASP/LGI1	47
GO:0097485	neuron projection guidance	47/2412	234/18888	0.200855	1.57286	3.37378	0.00100281	0.0390466	0.0344133	KALRN/CHL1/PAX6/BCL11B/VEGFA/VANGL2/NELL2/EPHA7/ANOS1/NRP2/EFNB2/L1CAM/SEMA3A/PLXNA3/EFNB1/PTPRO/BMP7/USP33/RAC3/CDK5R1/EPHA6/SEMA6C/PTPRM/KLF7/SEMA7A/B4GAT1/NOVA2/ROBO2/EFNA3/EPHA3/MATN2/IGSF9/ADAM17/DSCAML1/CDK5R2/EFNA1/NOG/DRAXIN/NRXN3/UNC5C/TBR1/TRIO/DVL1/EPHB3/CNTN1/VASP/LGI1	47
GO:0051961	negative regulation of nervous system development	34/2412	155/18888	0.219355	1.71773	3.43297	0.00101079	0.0390466	0.0344133	PAX6/HES1/WNT7A/EPHA7/BRINP1/SEMA3A/PLXNA3/SYNGAP1/KDM4A/IFRD1/DAB1/BMP7/NF2/LRP4/SEMA6C/SEMA7A/ROBO2/PTN/PTPN13/KIFAP3/HES5/APPL2/BTG2/NOG/DRAXIN/THY1/SORL1/FGF13/NFATC4/HOOK3/PROX1/PRTG/NF1/NR1D1	34
GO:0007264	small GTPase-mediated signal transduction	88/2412	500/18888	0.176	1.37823	3.27957	0.00101968	0.0390466	0.0344133	KALRN/RAF1/ADGRG1/AMOT/RAP2C/TSC2/RAB9B/BCR/ITSN1/ARHGAP21/SYNGAP1/ARHGAP23/SRC/SCAI/NCKAP1/FGD4/DAB1/NKIRAS2/PSD2/FGD1/ITGAV/PREX2/CDON/NKIRAS1/KSR1/USO1/WASF1/RASA2/RALGPS1/RAC3/RRAS2/SIAH2/LRP4/ELMO1/SOS2/KRIT1/IQGAP3/F11R/PREX1/TNK2/SPATA13/PHACTR4/SRGAP3/FGF2/RAB39B/HACE1/RHOB/SIPA1L2/KNDC1/SPRY1/MAPKAPK5/DOK6/F2R/TAX1BP3/SPRY2/VAV2/DENND4C/NET1/HRAS/FBXO8/GIT1/ARL3/TRIO/HEG1/MMD2/KBTBD6/TRI…	88
GO:0061351	neural precursor cell proliferation	36/2412	167/18888	0.215569	1.68809	3.41728	0.00102165	0.0390466	0.0344133	IGF2BP1/PAX6/VEGFA/ADGRG1/WNT7A/PLXNB2/INSM1/KDM1A/CDH2/CDON/NF2/IFT20/RASSF10/FGF2/PTN/DISP3/KIFAP3/PDE9A/FGFR1/TOX/APPL2/BTG2/ID2/TEAD3/TRNP1/RAB10/FGF13/HOOK3/PTPRZ1/KIF14/PROX1/DAGLB/FLNA/NF1/LNX2/GNAI2	36
GO:0062237	protein localization to postsynapse	14/2412	45/18888	0.311111	2.43626	3.69071	0.00103041	0.039129	0.0344859	ERBB4/NSG1/ADAM10/SNAP25/CACNG7/NETO2/GRIP2/GRIP1/C1QL2/ZDHHC2/HRAS/CACNG2/CPLX1/LGI1	14
GO:1901800	positive regulation of proteasomal protein catabolic process	26/2412	109/18888	0.238532	1.86791	3.47692	0.00106455	0.040168	0.0354016	PSMD10/HSPA1B/HSPA1A/BAG6/HECTD1/FBXW7/SOCS5/KEAP1/CBFA2T3/HSPBP1/UBQLN2/GSK3B/BBS7/TRIB1/SMAD7/ZYG11B/BCAP31/GSK3A/COP1/DVL1/CSNK1D/PLK3/AXIN1/DNAJB2/IL33/SOCS4	26
GO:0006888	endoplasmic reticulum to Golgi vesicle-mediated transport	30/2412	132/18888	0.227273	1.77974	3.43961	0.00107236	0.0402069	0.0354359	TMED7/HYOU1/COPE/RAB1A/SEC31A/ARF4/USO1/TMED5/STX5/TRAPPC4/KDELR1/BET1/SEC24C/KDELR2/YIF1A/PGAP1/COPB2/PREB/SEC24A/COPG1/BCAP31/TMED3/SORL1/INSIG1/SCFD1/GOLGA2/SEC24B/CSNK1D/WHAMM/YIPF6	30
GO:0010212	response to ionizing radiation	31/2412	138/18888	0.224638	1.7591	3.4244	0.00109586	0.0408294	0.0359846	HSF1/KDM1A/NIPBL/BCL2L1/STK11/CCND2/MRNIP/XRRA1/SFRP2/MEN1/RHOB/INO80/NET1/HRAS/MAPK14/ERCC8/COP1/TMEM109/MYC/TSPYL5/PML/PARP1/FANCD2/WRN/CDKN1A/INTS3/INTS7/FBXO4/RAD1/SWI5/USP28	31
GO:0007406	negative regulation of neuroblast proliferation	6/2412	11/18888	0.545455	4.27137	4.15244	0.00112112	0.0415094	0.0365838	PAX6/PTN/KIFAP3/BTG2/PROX1/NF1	6
GO:0034599	cellular response to oxidative stress	49/2412	248/18888	0.197581	1.54722	3.31904	0.0011526	0.042248	0.0372348	HSPA1B/HSPA1A/STAU2/STAU1/ATF2/JUN/HM13/KDM6B/SOD1/SRC/ARL6IP5/HSF1/TMEM161A/BMP7/HTRA2/KEAP1/TRAP1/PEX13/PCGF2/FER/IL18BP/ATP7A/FXN/NUDT2/RHOB/PNPLA8/PEX5/SELENON/NET1/PEX2/ANKZF1/PINK1/SMPD3/PARP1/PEX10/FANCD2/OSER1/NME2/BRF2/SRXN1/SLC1A1/CBX8/SESN2/PRDX3/MEAK7/PAWR/ZNF277/AIFM1/PLEKHA1	49
GO:2001233	regulation of apoptotic signaling pathway	72/2412	396/18888	0.181818	1.42379	3.261	0.00116096	0.042248	0.0372348	PSMD10/RAF1/HSPA1B/HSPA1A/DDX3X/IVNS1ABP/SCRT2/TMEM14A/ITM2C/JAK2/FBXW7/SOD1/HYOU1/HTT/SRC/KDM1A/TMEM161A/BCL2L1/SKIL/HSPB1/ACVR1/ITGAV/HTRA2/TRAP1/ITGA6/SIAH2/PCGF2/COL2A1/RB1CC1/SERINC3/BBC3/HYAL2/PEA15/FBXO7/SFRP2/PIAS4/FXN/MCL1/BAD/GSK3B/INHBB/FGFR1/NCK1/PMAIP1/NOG/BCAP31/TXNDC12/PAK5/XBP1/PINK1/MYC/PML/GHITM/URI1/PARP1/NFATC4/DEDD2/USP47/TRIM32/FIS1/FAIM/PLAGL2/ACKR3/STYXL1/PSME3/ING5/NF1/RR…	72
GO:0071900	regulation of protein serine/threonine kinase activity	52/2412	267/18888	0.194757	1.52511	3.30634	0.00116341	0.042248	0.0372348	PSMD10/SYAP1/VEGFA/DDX3X/IPO5/PKIB/IRAK1/HTT/SRC/HGS/PAK1/NTRK3/HIPK3/CCND1/INSR/KSR1/CDK5R1/CCND2/CALM3/TCIM/HYAL2/CALM2/FERMT2/MEN1/FGF2/DUSP16/HMGA2/SPRY1/TRIB1/FGFR1/ADAM17/AIDA/CDK5R2/PPP2CA/SPRY2/DUSP1/MAP3K13/PAQR3/HRAS/CDKN1B/INPP5K/THY1/CIB1/CCNH/STK38/HEG1/CDKN1A/PROX1/TFAP4/NF1/TESK1/PDGFC	52
GO:0006644	phospholipid metabolic process	70/2412	383/18888	0.182768	1.43123	3.26214	0.00116959	0.042248	0.0372348	INPP5F/PHB2/PCYT1B/PLCB1/SELENOI/SOCS5/HDHD5/SOCS7/PIK3C2B/PLCB4/PIK3CA/PIGN/GPCPD1/ORMDL3/IDH1/SPTLC2/PLA2G6/PLA2G4B/PLPP5/PIK3C3/IDI1/INPP4A/AGPAT1/PNPLA8/GNB3/PGAP1/SLC30A5/CDS2/PLPPR2/PI4KA/MTMR3/DGKE/PLPPR5/GDPD1/PLCG1/SMPD3/INPP5K/SGPP1/PIGT/PIGX/NUS1/PLCD1/PLSCR3/PIK3R2/PITPNM2/PNPLA7/IPMK/PIGU/PGAP2/PIGF/CDIPT/PLBD2/SYNJ1/PLCH2/MBOAT7/PI4KB/SLC27A1/INPP5B/TMEM150A/IP6K1/PMVK/EFR3A/PIGL/CE…	70
GO:0021987	cerebral cortex development	29/2412	127/18888	0.228346	1.78815	3.40977	0.00119023	0.0427329	0.0376621	PAX6/ADGRG1/MDGA1/PLCB1/KIF26A/KDM1A/CDH2/DAB1/SRD5A1/CDON/PEX13/CDK5R1/NPY/GSK3B/SUN2/NTRK2/PEX5/CDK5R2/BTBD3/FBXO45/TBR1/SYNE2/FGF13/FAT4/KIF14/MBOAT7/TH/FLNA/NF1	29
GO:0036465	synaptic vesicle recycling	21/2412	82/18888	0.256098	2.00546	3.49115	0.00119849	0.0427702	0.0376951	NLGN2/NLGN4X/WNT7A/ACTG1/ITSN1/PICALM/RAB3A/VAMP2/STON1/SH3GL3/FCHO2/SH3GL1/SNAP91/VAMP4/GIT1/CANX/DNM1/PPP3CC/AMPH/ITSN2/SYNJ1	21
GO:0048593	camera-type eye morphogenesis	30/2412	133/18888	0.225564	1.76636	3.39346	0.00121874	0.0432324	0.0381024	PAX6/VEGFA/MEIS1/SDK2/SOX9/RPGRIP1L/HIPK1/BMP7/CDON/HIPK2/SHROOM2/PTPRM/JAG1/PHACTR4/C12orf57/IFT122/NTRK2/CITED2/ZEB1/IFT172/TENM3/GDF11/THY1/NECTIN3/STAT3/RORB/SLC1A1/PROX1/TH/NF1	30
GO:1903829	positive regulation of protein localization	85/2412	483/18888	0.175983	1.3781	3.22074	0.0012334	0.0434922	0.0383313	NNAT/NLGN2/ERBB4/WNT7A/C2CD5/IPO5/JAK2/TM7SF3/TOMM7/EIF4G1/FBXW7/VRK1/PLCB1/SNAP25/ABHD17B/SRC/SSH1/SREBF2/VAMP2/ACSL4/WLS/LAMTOR5/TMEM132A/SORBS1/STK11/TCAF1/HUWE1/KCNB1/HTRA2/TMEM30A/NF2/CDK5R1/PIK3CA/GPR27/BAP1/LRP4/ORMDL3/JAK1/HYAL2/HPS4/HPCA/TRPM4/PLA2G6/CHRM1/FERMT2/KAT7/JUP/BAD/WRAP53/FRMD4A/GSK3B/EFCAB7/EPHA3/SERP1/SEC24A/ABAT/ZDHHC2/BCAP31/HRAS/CACNG2/MARK4/GSK3A/MAPK14/PINK1/CIB1/ARIH2/…	85
GO:0045859	regulation of protein kinase activity	83/2412	470/18888	0.176596	1.38289	3.21626	0.00126042	0.0438353	0.0386338	PSMD10/SYAP1/GNAQ/VEGFA/PHB2/DDX3X/IPO5/JAK2/PKIB/IRAK1/RAP2C/TSC2/FBXW7/CAMK2N1/SOD1/HTT/SOCS5/SRC/HGS/JTB/PAK1/PRRC1/NTRK3/HIPK3/HSPB1/PTPRO/STK11/CCND1/INSR/KSR1/MMD/CDK5R1/CCND2/CALM3/MRNIP/TCIM/TNFRSF10B/PPM1E/HYAL2/CALM2/FERMT2/CBLB/MEN1/FGF2/CAMK2N2/DUSP16/HMGA2/SPRY1/TRIB1/FGFR1/ADAM17/AIDA/CDK5R2/EFNA1/PPP2CA/SPRY2/DUSP1/MAP3K13/PAQR3/HRAS/CDKN1B/DUSP22/PINK1/INPP5K/THY1/CIB1/CCNH/STK38/…	83
GO:0031330	negative regulation of cellular catabolic process	45/2412	224/18888	0.200893	1.57316	3.30174	0.00126213	0.0438353	0.0386338	DDIT4/HNRNPU/QKI/IGF2BP1/HNRNPA0/HNRNPC/EIF4G2/TIMP2/IGF2BP3/TIMP3/CSDE1/EIF4G1/TSC2/KDM4A/TIMP1/LARP1/CBFA2T3/PIK3CA/METTL16/HERC1/MCL1/TENT2/PHAX/STK38L/LARP1B/FOXK1/CNR1/WNK1/TOB1/IGF2BP2/PPP2CA/NOCT/GSK3A/MAPK14/PINK1/GIT1/SORL1/STAT3/UPF3A/SCFD1/NSUN2/GOLGA2/PHF23/TENT4B/RUBCN	45
GO:0071478	cellular response to radiation	38/2412	181/18888	0.209945	1.64404	3.33118	0.00126533	0.0438353	0.0386338	POLK/NMT2/HSF1/KDM1A/TIMP1/TMEM161A/NIPBL/BCL2L1/STK11/SDE2/CCND2/DDB2/HYAL2/SFRP2/RHOB/N4BP1/INO80/RDH11/NET1/HRAS/CASP9/MAPK14/TMEM109/MYC/TSPYL5/PARP1/CRY2/NFATC4/WRN/CDKN1A/USP47/POLD1/POLD3/INTS7/FBXO4/RAD1/SWI5/USP28	38
GO:1903008	organelle disassembly	37/2412	175/18888	0.211429	1.65566	3.33406	0.00127327	0.0438539	0.0386501	KLC1/PHB2/TOMM7/TSC2/FBXW7/VRK1/ATG4A/SPATA18/VPS13C/ATG12/HTT/SREBF2/KLHDC10/ATG4B/HUWE1/HTRA2/RB1CC1/UFM1/GFM2/FBXO7/STX5/USP10/HAX1/GSK3A/ANKZF1/PINK1/MRRF/SNX7/NEDD9/FKBP8/GOLGA2/PLK3/FIS1/ATG4C/DYRK3/TEX264/UFL1	37
GO:0032869	cellular response to insulin stimulus	42/2412	206/18888	0.203883	1.59658	3.29409	0.00133454	0.0452957	0.0399208	SYAP1/PAX6/IGF1R/RAF1/NCL/C2CD5/TSC2/ZFP36L1/SRC/VAMP2/SORBS1/INSIG2/SRD5A1/INSR/USO1/PIK3CA/NCOA2/FER/SOS2/COL6A1/USF1/GSK3B/INHBB/NCK1/APPL2/DENND4C/HRAS/XBP1/GSK3A/ZNF592/INPP5K/PARP1/HDAC9/SORL1/INSIG1/RAB10/HDAC5/PIK3R2/C1QTNF12/SLC27A1/IDE/GNAI2	42
GO:0018126	protein hydroxylation	9/2412	23/18888	0.391304	3.06424	3.79001	0.00134777	0.0452957	0.0399208	ASPH/EGLN3/JMJD6/P4HA1/PLOD3/P3H4/CRTAP/P3H3/VPS33B	9
GO:0006612	protein targeting to membrane	29/2412	128/18888	0.226562	1.77418	3.36258	0.00135469	0.0452957	0.0399208	BAG6/SRP54/C2CD5/ARL6IP1/SRPRB/SEC61G/TCAF1/KCNB1/SRPRA/ZDHHC6/CDK5R1/HPCA/VPS37D/VPS37B/ZDHHC2/SEC62/HRAS/CACNG2/INPP5K/CIB1/MIEF2/SLC1A1/SEC61A2/VPS37A/DMTN/TRAM1L1/FIS1/SGTB/AQP11	29
GO:0031589	cell-substrate adhesion	66/2412	359/18888	0.183844	1.43965	3.21793	0.00136359	0.0452957	0.0399208	CASK/RASA1/VEGFA/ACTG1/PRKX/JAM3/JAK2/L1CAM/BCR/CDH11/NDNF/ATP1B2/ITGB8/SRC/ST6GAL1/RAB1A/GPM6B/SORBS1/PTPRO/ITGAV/NF2/RAC3/ITGA6/ITGA7/STON1/CAMSAP3/ADAMTS13/FER/JAG1/PREX1/FERMT2/FZD7/JUP/TMEM8B/GSK3B/EPHA3/AJAP1/TRPM7/EFNA1/DUSP22/ADAM15/EFEMP2/S100A10/THY1/CIB1/CSPG5/EPHB3/MYADM/SPOCK1/NEDD9/KIF14/DMTN/ARL2/ITGA9/FLNA/WHAMM/BVES/ITGB5/NF1/COL26A1/BCL6/TESK1/WDPCP/PLEKHA2/DOCK5/BCL2L11	66
GO:0006913	nucleocytoplasmic transport	62/2412	333/18888	0.186186	1.458	3.22624	0.00136375	0.0452957	0.0399208	KHDRBS1/PHB2/KPNA5/IPO5/KPNB1/JAK2/ATF2/ATXN1/TSC2/KPNA3/UPF2/TXNIP/RPAIN/KPNA1/UFM1/HYAL2/IWS1/ALKBH5/CBLB/NCBP2/KPNA4/JUP/FRAT1/XPO5/DUSP16/PHAX/GSK3B/EFCAB7/XPO1/KPNA6/ING1/WNK1/APPL2/CSE1L/RBM33/XPO7/RANBP17/CDKN1B/AKAP8L/MAPK14/FRAT2/PML/CRY2/POM121/STAT3/NOL6/IPO13/CDKN1A/PIK3R2/NSUN2/UBR5/DESI1/AXIN1/STYX/IL33/WASHC4/FLNA/NF1/RBM22/KPNA2/RITA1/RSRC1	62
GO:0051169	nuclear transport	62/2412	333/18888	0.186186	1.458	3.22624	0.00136375	0.0452957	0.0399208	KHDRBS1/PHB2/KPNA5/IPO5/KPNB1/JAK2/ATF2/ATXN1/TSC2/KPNA3/UPF2/TXNIP/RPAIN/KPNA1/UFM1/HYAL2/IWS1/ALKBH5/CBLB/NCBP2/KPNA4/JUP/FRAT1/XPO5/DUSP16/PHAX/GSK3B/EFCAB7/XPO1/KPNA6/ING1/WNK1/APPL2/CSE1L/RBM33/XPO7/RANBP17/CDKN1B/AKAP8L/MAPK14/FRAT2/PML/CRY2/POM121/STAT3/NOL6/IPO13/CDKN1A/PIK3R2/NSUN2/UBR5/DESI1/AXIN1/STYX/IL33/WASHC4/FLNA/NF1/RBM22/KPNA2/RITA1/RSRC1	62
GO:0009209	pyrimidine ribonucleoside triphosphate biosynthetic process	7/2412	15/18888	0.466667	3.65439	3.93491	0.00138395	0.0452957	0.0399208	CTPS2/UCKL1/NME7/UCK2/NME2/UCK1/NME3	7
GO:0016558	protein import into peroxisome matrix	7/2412	15/18888	0.466667	3.65439	3.93491	0.00138395	0.0452957	0.0399208	USP9X/PEX6/PEX13/LONP2/PEX5/PEX2/PEX10	7
GO:1904507	positive regulation of telomere maintenance in response to DNA damage	7/2412	15/18888	0.466667	3.65439	3.93491	0.00138395	0.0452957	0.0399208	INO80E/INO80B/INO80/INO80C/UCHL5/NFRKB/INO80D	7
GO:0001570	vasculogenesis	21/2412	83/18888	0.253012	1.9813	3.42805	0.00141468	0.045767	0.0403362	QKI/RASA1/VEGFA/WNT7A/AMOT/HEY1/FBXW7/ZFP36L1/ITGB8/ITGAV/NTRK2/GLMN/CITED2/HEG1/HIF1AN/TIPARP/SPRED1/JUNB/ACKR3/CUL7/RAMP2	21
GO:0007224	smoothened signaling pathway	32/2412	146/18888	0.219178	1.71635	3.32459	0.00141779	0.045767	0.0403362	PAX6/HES1/SEPTIN2/IFT81/SCUBE1/IFT52/TXNDC15/KCTD6/IFT80/RPGRIP1L/HERC4/HIPK1/CDON/HIPK2/IFT20/DISP3/IFT122/EFCAB7/BBS7/HES5/NOG/IFT172/ARL3/INTU/UCHL5/IFT27/FKBP8/HSPG2/TTBK2/STIL/WDPCP/KIAA0586	32
GO:0010801	negative regulation of peptidyl-threonine phosphorylation	8/2412	19/18888	0.421053	3.2972	3.83306	0.00142806	0.045767	0.0403362	EIF4G1/CALM3/CALM2/SMAD7/SPRY2/INPP5K/DMTN/SPRED1	8
GO:0021915	neural tube development	34/2412	158/18888	0.21519	1.68512	3.30879	0.00143114	0.045767	0.0403362	ATP6AP2/PAX6/HES1/VANGL2/PLXNB2/ITPK1/IFT52/TSC2/ZFP36L1/RPGRIP1L/RARA/BMP7/PHGDH/SFRP2/PHACTR4/IFT122/HES5/GLMN/CITED2/NOG/MIB1/PLOD3/IFT172/INTU/DVL1/MED12/FKBP8/SEC24B/PROX1/STIL/NF1/WDPCP/VASP/LUZP1	34
GO:0034764	positive regulation of transmembrane transport	43/2412	213/18888	0.201878	1.58087	3.26202	0.0014447	0.045767	0.0403362	C2CD5/ARL6IP1/ATP1B2/HTT/AZIN1/SLC38A1/STIM1/SORBS1/AKAP6/TCAF1/INSR/STIM2/CALM3/PLP1/MEF2A/CALM2/STIMATE/CACNB3/VMP1/NTSR1/KCNH2/AZIN2/F2R/KCNIP2/ACSL1/PLCG1/MAPK14/LRRC55/PPP3CC/ATP1B1/THY1/TRPC3/FGF13/SHANK3/KCNC2/C1QTNF12/TRPC1/CACNA2D1/WNK3/FLNA/ATPSCKMT/AMIGO1/KLF15	43
GO:0051348	negative regulation of transferase activity	43/2412	213/18888	0.201878	1.58087	3.26202	0.0014447	0.045767	0.0403362	GNAQ/HNRNPU/IPO5/PKIB/TSC2/CAMK2N1/SOCS5/SRC/HIPK3/HSPB1/PTPRO/EIF4A2/PPM1E/HYAL2/CBLB/MEN1/CAMK2N2/DUSP16/GSK3B/SPRY1/TRIB1/SMAD7/AIDA/SPRY2/DUSP1/PAQR3/CDKN1B/DUSP22/GSK3A/INPP5K/THY1/STK38/HEG1/CDKN1A/ERRFI1/PRDX3/POT1/SPRED1/TFAP4/NPRL2/NF1/TESK1/SOCS4	43
GO:0016055	Wnt signaling pathway	82/2412	466/18888	0.175966	1.37796	3.16093	0.00149213	0.047018	0.0414388	ATP6AP2/GNAQ/TLE1/DDX3X/VANGL2/WNT7A/TMEM131L/TBL1X/JADE1/AMER2/TSC2/NRARP/AMFR/IFT80/SOX9/NLK/SRC/SHISA2/JRK/CDH2/WLS/TMEM132A/PTPRO/STK11/CCND1/FBXW4/HMGXB4/RAC3/SIAH2/CXXC4/PAF1/KPNA1/LRP4/PTPRU/TRPM4/COL6A1/SFRP2/IFT20/HECW1/PIAS4/FERMT2/AMOTL1/FZD7/JUP/FRAT1/FGF2/DKK3/GSK3B/PPM1B/SMURF2/WNK1/USP34/NOG/PPP2CA/TAX1BP3/DRAXIN/TLE2/GSK3A/TMEM198/MAPK14/FRAT2/AMER3/CTNND1/DVL1/ZEB2/MED12/FRZB/NFA…	82
GO:0007179	transforming growth factor beta receptor signaling pathway	48/2412	245/18888	0.195918	1.53421	3.22017	0.0015458	0.0482625	0.0425357	USP9X/RBBP7/HSPA1A/JUN/NLK/ITGB8/SRC/VEPH1/SKIL/SAP30L/ACVR1/STK11/ZNF451/HIPK2/PMEPA1/FERMT2/MEN1/SMAD1/IL17RD/SMAD5/DKK3/SPRY1/ING1/SMURF2/ADAM17/SMAD7/APPL2/CITED2/LTBP1/SPRY2/ZEB1/TET1/STRAP/DUSP22/PML/ARRB2/LEMD3/SMAD9/PARP1/STAT3/ZEB2/SINHCAF/TWSG1/AXIN1/BCL9L/SPRED1/ITGB5/HTRA1	48
GO:0022616	DNA strand elongation	12/2412	37/18888	0.324324	2.53973	3.58694	0.00155228	0.0482625	0.0425357	POLA1/INO80E/INO80B/POLE3/INO80/INO80C/UCHL5/POT1/NFRKB/LIG3/POLD3/INO80D	12
GO:0018210	peptidyl-threonine modification	25/2412	106/18888	0.235849	1.8469	3.34547	0.00155846	0.0482625	0.0425357	ATF2/EIF4G1/PRKCA/NLK/HIPK1/HIPK3/STK11/ACVR1B/HIPK2/CDK5R1/CAMK2D/CALM3/CALM2/GSK3B/WNK1/SMAD7/SPRY2/GSK3A/INPP5K/GALNT13/AXIN1/DMTN/SPRED1/WNK3/DYRK3	25
GO:0030218	erythrocyte differentiation	30/2412	135/18888	0.222222	1.74019	3.30231	0.00156421	0.0482625	0.0425357	HSPA1B/VEGFA/HSPA1A/KMT2E/JAK2/THRA/TMEM14C/ACIN1/ZFP36L1/JMJD6/ACVR1B/HIPK2/HSCB/BAP1/STAT5B/SMAD5/CITED2/SMAP1/ID2/MAPK14/STAT3/FAM210B/INHA/FLVCR1/DMTN/ERCC2/L3MBTL3/BCL6/DYRK3/UFL1	30
GO:0050806	positive regulation of synaptic transmission	37/2412	177/18888	0.20904	1.63696	3.25756	0.0015766	0.0483769	0.0426365	NLGN2/STAU1/NSG1/CALB2/LRRTM2/RAB3GAP1/SNAP25/VAMP2/CACNG7/SLC1A3/SCGN/CACNG4/SHISA7/PTN/GSK3B/NTRK2/PDE9A/FXR1/IGSF11/NOG/C22orf39/ZDHHC2/NCSTN/ARC/CACNG2/PINK1/ARRB2/SHANK3/NFATC4/SLC1A1/NPTN/KCTD13/AGER/NF1/ROR2/TSHZ3/LGI1	37
GO:0007034	vacuolar transport	36/2412	171/18888	0.210526	1.6486	3.25987	0.00158893	0.0483769	0.0426365	HSPA1A/VPS54/TMEM106B/VPS13C/HGS/LEPROTL1/CACNG7/VPS52/VPS13A/PLEKHF2/HMGXB4/VPS8/VTA1/STAM/VPS53/VPS37D/CACNG4/STAM2/PIK3C3/VPS37B/RHOB/VPS41/PXK/TMEM50B/CACNG2/NCOA4/PINK1/VPS4A/SORL1/SLC30A4/GPRASP1/VPS39/HOOK3/VPS37A/EHD3/USE1	36
GO:0034332	adherens junction organization	16/2412	57/18888	0.280702	2.19813	3.46617	0.00159242	0.0483769	0.0426365	VEGFA/JAM3/EFNB2/TJP1/ADAM10/CDH11/SRC/CDH2/HIPK1/CDH22/CAMSAP3/FER/PLEC/FERMT2/SMAD7/RAMP2	16
GO:0071364	cellular response to epidermal growth factor stimulus	13/2412	42/18888	0.309524	2.42383	3.53442	0.00162541	0.0491271	0.0432976	SYAP1/ERBB4/NCL/ZFP36L1/SOX9/PTPN12/STAT5B/PLCG1/DUSP22/INPP5K/GAREM1/BAG4/PDE8A	13

## Sheet: GE NPC_Down
ID	Description	GeneRatio	BgRatio	RichFactor	FoldEnrichment	zScore	pvalue	p.adjust	qvalue	geneID	Count
GO:0007059	chromosome segregation	84/995	423/18888	0.198582	3.76966	13.5854	1.26998e-26	6.54673e-23	5.54245e-23	TOP2A/CENPU/NUSAP1/KIFC1/CENPM/PSRC1/UBE2C/CDK1/GPSM2/ZWINT/CCNB2/TACC3/SPC24/PRC1/UBE2I/PTTG1/CCNB1/RNF4/NDC80/MYBL2/CENPF/ESPL1/BUB1/AURKB/CCNE2/CENPE/CENPQ/SMC2/CHMP3/SMC4/KIF22/CENPK/KNL1/BUB3/RHOA/BIRC5/CDC20/TUBB/SPC25/DLGAP5/GEN1/MAD2L2/ASPM/KNSTRN/SMARCA2/ESCO2/RB1/BUB1B/NCAPH/MKI67/TPR/DSN1/CDK5RAP2/SMARCE1/NEK2/TTK/CHEK2/ECT2/RCC2/CENPH/NCAPD2/ITGB3BP/MAD2L1/TRIP13/SMARCC1/TTL/PBRM1/ACT…	84
GO:0098813	nuclear chromosome segregation	70/995	317/18888	0.22082	4.19181	13.5145	3.53984e-25	9.12395e-22	7.72431e-22	TOP2A/NUSAP1/KIFC1/PSRC1/UBE2C/CDK1/ZWINT/CCNB2/TACC3/SPC24/PRC1/PTTG1/CCNB1/NDC80/MYBL2/CENPF/ESPL1/BUB1/AURKB/CCNE2/CENPE/CENPQ/SMC2/CHMP3/SMC4/KIF22/CENPK/KNL1/BUB3/RHOA/BIRC5/CDC20/SPC25/DLGAP5/GEN1/MAD2L2/ASPM/KNSTRN/SMARCA2/RB1/BUB1B/NCAPH/TPR/DSN1/CDK5RAP2/SMARCE1/NEK2/TTK/CHEK2/ECT2/RCC2/NCAPD2/MAD2L1/TRIP13/SMARCC1/TTL/PBRM1/ACTL6A/NUMA1/CDT1/FAM83D/BCL7B/CHMP1A/MAPK15/CENPI/SKA1/WASHC5/…	70
GO:0000819	sister chromatid segregation	58/995	229/18888	0.253275	4.8079	13.6713	3.04755e-24	5.2367e-21	4.43338e-21	TOP2A/NUSAP1/KIFC1/PSRC1/UBE2C/CDK1/ZWINT/TACC3/SPC24/PRC1/CCNB1/NDC80/MYBL2/CENPF/ESPL1/BUB1/AURKB/CENPE/SMC2/CHMP3/SMC4/KIF22/CENPK/KNL1/BUB3/RHOA/BIRC5/CDC20/SPC25/DLGAP5/GEN1/MAD2L2/KNSTRN/SMARCA2/RB1/BUB1B/NCAPH/TPR/CDK5RAP2/SMARCE1/NEK2/TTK/CHEK2/NCAPD2/MAD2L1/TRIP13/SMARCC1/PBRM1/ACTL6A/NUMA1/CDT1/BCL7B/CHMP1A/MAPK15/CENPI/SKA1/KIFC2/CDCA5	58
GO:0044772	mitotic cell cycle phase transition	82/995	451/18888	0.181818	3.45144	12.4256	2.35823e-23	3.03917e-20	2.57296e-20	ID4/CDK6/NES/CCNI/UBE2C/CDK1/ZWINT/CCNB2/TACC3/SPC24/EGFR/CCNB1/CDC25B/NDC80/CCNA2/CKS1B/CENPF/ESPL1/FOXM1/BUB1/AURKB/RRM2/CDK3/CCNE2/CENPE/E2F1/CKS2/CDKN2C/CDKN3/PRKDC/KNL1/BUB3/PSME1/BIRC5/CDC20/SPC25/DLGAP5/GEN1/RFWD3/APP/MAD2L2/CCNG2/CDC25C/TP53/EZH2/SMARCA2/RB1/BUB1B/E2F7/TPR/CDK5RAP2/SMARCE1/TTK/CHEK2/PLK2/RCC2/TAOK2/RAD51C/CDKN1C/DLG1/MAD2L1/AKT1/TRIP13/SMARCC1/BRSK2/PBRM1/ACTL6A/CALM1/DBF…	82
GO:0051983	regulation of chromosome segregation	43/995	131/18888	0.328244	6.23103	14.1675	3.91623e-23	4.03763e-20	3.41825e-20	UBE2C/CDK1/ZWINT/TACC3/SPC24/CCNB1/NDC80/CENPF/ESPL1/BUB1/AURKB/CENPE/SMC2/SMC4/KNL1/BUB3/BIRC5/CDC20/SPC25/DLGAP5/GEN1/MAD2L2/SMARCA2/RB1/BUB1B/NCAPH/MKI67/TPR/CDK5RAP2/SMARCE1/TTK/RCC2/NCAPD2/MAD2L1/TRIP13/SMARCC1/PBRM1/ACTL6A/NUMA1/BCL7B/MAPK15/CDCA2/RAD18	43
GO:0000070	mitotic sister chromatid segregation	49/995	188/18888	0.260638	4.94767	12.8278	2.99541e-21	2.57356e-18	2.17877e-18	NUSAP1/KIFC1/PSRC1/UBE2C/CDK1/ZWINT/SPC24/PRC1/CCNB1/NDC80/MYBL2/CENPF/ESPL1/BUB1/AURKB/CENPE/SMC2/CHMP3/SMC4/KIF22/CENPK/KNL1/BUB3/RHOA/BIRC5/CDC20/SPC25/DLGAP5/GEN1/MAD2L2/KNSTRN/RB1/BUB1B/NCAPH/TPR/CDK5RAP2/NEK2/TTK/CHEK2/NCAPD2/MAD2L1/TRIP13/NUMA1/CDT1/CHMP1A/CENPI/SKA1/KIFC2/CDCA5	49
GO:1901990	regulation of mitotic cell cycle phase transition	68/995	356/18888	0.191011	3.62595	11.7951	9.47078e-21	6.97455e-18	5.90464e-18	CDK6/UBE2C/CDK1/ZWINT/SPC24/EGFR/CCNB1/CDC25B/NDC80/CENPF/ESPL1/BUB1/AURKB/RRM2/CDK3/CCNE2/CENPE/E2F1/CDKN2C/PRKDC/KNL1/BUB3/PSME1/BIRC5/CDC20/SPC25/DLGAP5/GEN1/RFWD3/APP/MAD2L2/CDC25C/TP53/EZH2/SMARCA2/RB1/BUB1B/E2F7/TPR/CDK5RAP2/SMARCE1/TTK/CHEK2/PLK2/RCC2/TAOK2/RAD51C/CDKN1C/DLG1/MAD2L1/AKT1/TRIP13/SMARCC1/PBRM1/ACTL6A/DBF4B/CLSPN/PSME2/CDC7/BCL7B/CTDSP2/CHEK1/RNASEH2B/ANLN/BLM/CCNE1/CDCA5/RPA2	68
GO:0000280	nuclear division	77/995	446/18888	0.172646	3.27732	11.4773	1.42859e-20	8.28159e-18	7.01118e-18	TOP2A/NUSAP1/KIFC1/PSRC1/UBE2C/CDK1/ZWINT/CCNB2/SPC24/PRC1/UBE2I/PTTG1/CCNB1/CDC25B/NDC80/MYBL2/CENPF/UBB/ESPL1/BUB1/AURKB/CCNE2/CENPE/SMC2/CKS2/CHMP3/SMC4/KIF22/CENPK/KNL1/BUB3/RHOA/BIRC5/CDC20/SPC25/DLGAP5/GEN1/MAD2L2/CDC25C/ASPM/KNSTRN/RAD54L/RB1/RAD51/BUB1B/FANCA/NCAPH/MKI67/TPR/CDK5RAP2/NEK2/TTK/CHEK2/SPIRE1/RAD51C/CDKN1C/NCAPD2/MAD2L1/TRIP13/TOM1L1/NUMA1/EGF/CDT1/CHMP1A/CHEK1/MAPK15/CENPI/N…	77
GO:0140014	mitotic nuclear division	59/995	277/18888	0.212996	4.04329	12.0323	1.44586e-20	8.28159e-18	7.01118e-18	NUSAP1/KIFC1/PSRC1/UBE2C/CDK1/ZWINT/SPC24/PRC1/UBE2I/CCNB1/NDC80/MYBL2/CENPF/ESPL1/BUB1/AURKB/CENPE/SMC2/CHMP3/SMC4/KIF22/CENPK/KNL1/BUB3/RHOA/BIRC5/CDC20/SPC25/DLGAP5/GEN1/MAD2L2/CDC25C/KNSTRN/RB1/BUB1B/NCAPH/MKI67/TPR/CDK5RAP2/NEK2/TTK/CHEK2/CDKN1C/NCAPD2/MAD2L1/TRIP13/TOM1L1/NUMA1/EGF/CDT1/CHMP1A/CHEK1/CENPI/NFIB/SKA1/ANLN/CDCA2/KIFC2/CDCA5	59
GO:0006260	DNA replication	59/995	278/18888	0.21223	4.02875	11.9968	1.74499e-20	8.99543e-18	7.61551e-18	NUCKS1/CDK1/EGFR/MCM3/DHX9/CCNA2/GINS1/DUT/PIF1/ORC6/CCNE2/GINS4/MCM4/E2F8/SET/MMS22L/PCNA/GEN1/SSBP1/RFWD3/PCLAF/FAM111B/CHAF1A/TP53/DTD1/ESCO2/TRAIP/RAD51/FAM111A/GINS3/E2F7/TK1/ZMPSTE24/MCM2/RFC2/SUPT16H/RPA3/CHAF1B/ACTL6A/CHTF18/FEN1/DBF4B/CDT1/CDC7/RFC4/RUVBL2/MCM7/CHEK1/RPA1/NFIB/BLM/NFIC/CHRAC1/CCNE1/POLA2/NT5M/CDC45/RMI1/RPA2	59
GO:1901987	regulation of cell cycle phase transition	77/995	455/18888	0.169231	3.21249	11.2653	4.90452e-20	2.29843e-17	1.94585e-17	CDK6/UBE2C/CDK1/ZWINT/SPC24/EGFR/CCNB1/MN1/CDC25B/NDC80/CENPF/ESPL1/BUB1/AURKB/RRM2/CDK3/CCNE2/CENPE/E2F1/CDKN2C/PRKDC/KNL1/BUB3/PSME1/BIRC5/CDC20/SPC25/DLGAP5/GEN1/RFWD3/APP/SIX3/MAD2L2/CDC25C/TP53/WDR76/EZH2/SMARCA2/RB1/RAD51/BUB1B/E2F7/TPR/CDK5RAP2/SMARCE1/TTK/CHEK2/PLK2/RCC2/TAOK2/APBB2/RAD51C/CDKN1C/DLG1/MAD2L1/AKT1/TRIP13/SMARCC1/PBRM1/ACTL6A/DBF4B/CLSPN/PSME2/CDT1/CDC7/FAM83D/BCL7B/CTDSP2/…	77
GO:1905818	regulation of chromosome separation	30/995	74/18888	0.405405	7.69578	13.609	1.47308e-19	6.3281e-17	5.35735e-17	UBE2C/ZWINT/SPC24/CCNB1/NDC80/CENPF/ESPL1/BUB1/AURKB/SMC2/SMC4/KNL1/BUB3/BIRC5/CDC20/SPC25/DLGAP5/GEN1/MAD2L2/RB1/BUB1B/NCAPH/TPR/CDK5RAP2/TTK/NCAPD2/MAD2L1/TRIP13/NUMA1/MAPK15	30
GO:0033045	regulation of sister chromatid segregation	35/995	104/18888	0.336538	6.38848	12.9939	1.78461e-19	7.07666e-17	5.99108e-17	UBE2C/CDK1/ZWINT/TACC3/SPC24/CCNB1/NDC80/CENPF/ESPL1/BUB1/AURKB/CENPE/KNL1/BUB3/BIRC5/CDC20/SPC25/DLGAP5/GEN1/MAD2L2/SMARCA2/RB1/BUB1B/TPR/CDK5RAP2/SMARCE1/TTK/MAD2L1/TRIP13/SMARCC1/PBRM1/ACTL6A/NUMA1/BCL7B/MAPK15	35
GO:0048285	organelle fission	79/995	493/18888	0.160243	3.04189	10.8332	4.65944e-19	1.71567e-16	1.45249e-16	TOP2A/NUSAP1/KIFC1/PSRC1/UCP2/UBE2C/CDK1/ZWINT/CCNB2/SPC24/PRC1/UBE2I/PTTG1/CCNB1/CDC25B/NDC80/MYBL2/CENPF/UBB/ESPL1/BUB1/AURKB/CCNE2/CENPE/SMC2/CKS2/CHMP3/SMC4/KIF22/CENPK/KNL1/BUB3/RHOA/BIRC5/CDC20/SPC25/DLGAP5/GEN1/MAD2L2/CDC25C/ASPM/KNSTRN/RAD54L/RB1/RAD51/BUB1B/FANCA/NCAPH/MKI67/TPR/CDK5RAP2/GDAP1/NEK2/TTK/CHEK2/SPIRE1/RAD51C/CDKN1C/NCAPD2/MAD2L1/TRIP13/TOM1L1/NUMA1/EGF/CDT1/CHMP1A/CHEK1/MAP…	79
GO:0033044	regulation of chromosome organization	53/995	247/18888	0.214575	4.07326	11.4647	9.51772e-19	3.27092e-16	2.76916e-16	TOP2A/HNRNPA2B1/UBE2C/CDK1/ZWINT/TACC3/SPC24/CCNB1/RNF4/HNRNPD/NDC80/CENPF/ESPL1/BUB1/AURKB/PIF1/CENPE/SMC2/SMC4/KNL1/BUB3/BIRC5/CDC20/SPC25/DLGAP5/GEN1/TEN1/GNL3/MAD2L2/TP53/SMARCA2/RB1/BUB1B/NCAPH/TPR/CDK5RAP2/SMARCE1/NEK2/TTK/SMG1/NCAPD2/MAD2L1/TRIP13/SMARCC1/PBRM1/ACTL6A/CTNNB1/FEN1/NUMA1/BCL7B/RUVBL2/MAPK15/TCP1	53
GO:0044784	metaphase/anaphase transition of cell cycle	33/995	97/18888	0.340206	6.4581	12.7088	1.32553e-18	4.27069e-16	3.61556e-16	UBE2C/ZWINT/TACC3/SPC24/CCNB1/NDC80/CENPF/ESPL1/BUB1/AURKB/CENPE/KNL1/BUB3/BIRC5/CDC20/SPC25/DLGAP5/GEN1/MAD2L2/SMARCA2/RB1/BUB1B/TPR/CDK5RAP2/SMARCE1/TTK/MAD2L1/TRIP13/SMARCC1/PBRM1/ACTL6A/BCL7B/MAPK15	33
GO:1902099	regulation of metaphase/anaphase transition of cell cycle	32/995	93/18888	0.344086	6.53176	12.6106	2.99888e-18	8.88076e-16	7.51843e-16	UBE2C/ZWINT/SPC24/CCNB1/NDC80/CENPF/ESPL1/BUB1/AURKB/CENPE/KNL1/BUB3/BIRC5/CDC20/SPC25/DLGAP5/GEN1/MAD2L2/SMARCA2/RB1/BUB1B/TPR/CDK5RAP2/SMARCE1/TTK/MAD2L1/TRIP13/SMARCC1/PBRM1/ACTL6A/BCL7B/MAPK15	32
GO:0051304	chromosome separation	30/995	81/18888	0.37037	7.03071	12.8263	3.10095e-18	8.88076e-16	7.51843e-16	UBE2C/ZWINT/SPC24/CCNB1/NDC80/CENPF/ESPL1/BUB1/AURKB/SMC2/SMC4/KNL1/BUB3/BIRC5/CDC20/SPC25/DLGAP5/GEN1/MAD2L2/RB1/BUB1B/NCAPH/TPR/CDK5RAP2/TTK/NCAPD2/MAD2L1/TRIP13/NUMA1/MAPK15	30
GO:1902850	microtubule cytoskeleton organization involved in mitosis	42/995	164/18888	0.256098	4.86148	11.7119	4.31306e-18	1.11388e-15	9.43005e-16	NUSAP1/KIFC1/PSRC1/CDK1/GPSM2/TACC3/PRC1/CCNB1/NDC80/MYBL2/ESPL1/AURKB/DCTN1/FSD1/CENPE/CHMP3/RHOA/BIRC5/CDC20/SPC25/DLGAP5/MAP4/GJA1/CENPA/SAPCD2/CKAP5/TPR/CDK5RAP2/NEK2/TTK/CHEK2/PLK2/CENPH/MAD2L1/NUMA1/HDAC3/CEP126/CHMP1A/DYNLT1/VCP/KIFC2/DCTN6	42
GO:0007091	metaphase/anaphase transition of mitotic cell cycle	32/995	94/18888	0.340426	6.46227	12.5193	4.32154e-18	1.11388e-15	9.43005e-16	UBE2C/ZWINT/TACC3/SPC24/CCNB1/NDC80/CENPF/ESPL1/BUB1/AURKB/CENPE/KNL1/BUB3/BIRC5/CDC20/SPC25/DLGAP5/GEN1/MAD2L2/SMARCA2/RB1/BUB1B/TPR/CDK5RAP2/SMARCE1/TTK/MAD2L1/TRIP13/SMARCC1/PBRM1/ACTL6A/BCL7B	32
GO:0030071	regulation of mitotic metaphase/anaphase transition	31/995	90/18888	0.344444	6.53856	12.4198	9.7703e-18	2.39838e-15	2.03046e-15	UBE2C/ZWINT/SPC24/CCNB1/NDC80/CENPF/ESPL1/BUB1/AURKB/CENPE/KNL1/BUB3/BIRC5/CDC20/SPC25/DLGAP5/GEN1/MAD2L2/SMARCA2/RB1/BUB1B/TPR/CDK5RAP2/SMARCE1/TTK/MAD2L1/TRIP13/SMARCC1/PBRM1/ACTL6A/BCL7B	31
GO:0010965	regulation of mitotic sister chromatid separation	24/995	59/18888	0.40678	7.72186	12.1942	5.88127e-16	1.37809e-13	1.16669e-13	UBE2C/ZWINT/SPC24/CCNB1/NDC80/CENPF/ESPL1/BUB1/AURKB/KNL1/BUB3/BIRC5/CDC20/SPC25/DLGAP5/GEN1/MAD2L2/RB1/BUB1B/TPR/CDK5RAP2/TTK/MAD2L1/TRIP13	24
GO:0051656	establishment of organelle localization	71/995	472/18888	0.150424	2.85548	9.62678	9.48561e-16	2.09286e-13	1.77181e-13	LMNB1/LMNB2/UCHL1/NUSAP1/KIFC1/NEFL/PTGDS/PSRC1/SYT4/GPSM2/ZWINT/CFL1/SPC24/LAMP1/CCNB1/FNBP1L/SLIT1/NDC80/CENPF/F8A1/UBB/ESPL1/AURKB/DCTN1/CENPE/HAP1/CENPQ/CHMP3/KIF22/KNL1/NTN1/BUB3/BIRC5/SPC25/EXOC7/SEPTIN5/MAP4/GJA1/CENPA/SAPCD2/KNSTRN/LMNA/RB1/TSG101/COPG2/DSN1/CDK5RAP2/NEK2/SPIRE1/ECT2/RCC2/EXOC5/DLG1/MAD2L1/TTL/KIT/TSC1/CTNNB1/NUMA1/HDAC3/CDT1/FAM83D/CHMP1A/MAPK15/KIF5C/DYNLT1/SKA1/BAIAP3/…	71
GO:0007051	spindle organization	43/995	197/18888	0.218274	4.14348	10.4587	9.74367e-16	2.09286e-13	1.77181e-13	KIFC1/PSRC1/GPSM2/CCNB2/TACC3/PRC1/CCNB1/RNF4/NDC80/MYBL2/ESPL1/AURKB/DCTN1/FSD1/CENPE/CHMP3/CHD3/RHOA/BIRC5/CDC20/TUBB/SPC25/DLGAP5/MAP4/ASPM/CKAP5/KNSTRN/TPR/NEK2/TTK/CHEK2/PLK2/CENPH/DLG1/NUMA1/HDAC3/CEP126/CHMP1A/MAPK15/VCP/WASHC5/KIFC2/DCTN6	43
GO:0051306	mitotic sister chromatid separation	24/995	62/18888	0.387097	7.34822	11.8065	2.26529e-15	4.67102e-13	3.95447e-13	UBE2C/ZWINT/SPC24/CCNB1/NDC80/CENPF/ESPL1/BUB1/AURKB/KNL1/BUB3/BIRC5/CDC20/SPC25/DLGAP5/GEN1/MAD2L2/RB1/BUB1B/TPR/CDK5RAP2/TTK/MAD2L1/TRIP13	24
GO:0007088	regulation of mitotic nuclear division	32/995	118/18888	0.271186	5.14791	10.6583	7.14851e-15	1.41733e-12	1.19991e-12	NUSAP1/UBE2C/ZWINT/SPC24/CCNB1/NDC80/CENPF/ESPL1/BUB1/AURKB/KNL1/BUB3/BIRC5/CDC20/SPC25/DLGAP5/GEN1/MAD2L2/CDC25C/RB1/BUB1B/MKI67/TPR/CDK5RAP2/NEK2/TTK/MAD2L1/TRIP13/TOM1L1/EGF/CHEK1/CDCA2	32
GO:0033047	regulation of mitotic sister chromatid segregation	22/995	54/18888	0.407407	7.73378	11.6852	9.32513e-15	1.78041e-12	1.50729e-12	CDK1/ZWINT/SPC24/CCNB1/NDC80/CENPF/BUB1/AURKB/KNL1/BUB3/BIRC5/CDC20/SPC25/GEN1/MAD2L2/BUB1B/TPR/CDK5RAP2/TTK/MAD2L1/TRIP13/NUMA1	22
GO:0051310	metaphase chromosome alignment	29/995	100/18888	0.29	5.50505	10.6515	1.93402e-14	3.56068e-12	3.01446e-12	KIFC1/PSRC1/ZWINT/SPC24/CCNB1/NDC80/CENPF/AURKB/CENPE/CENPQ/CHMP3/KIF22/KNL1/BUB3/BIRC5/SPC25/KNSTRN/RB1/DSN1/NEK2/ECT2/RCC2/TTL/NUMA1/CDT1/FAM83D/CHMP1A/SKA1/CDCA5	29
GO:0045839	negative regulation of mitotic nuclear division	22/995	56/18888	0.392857	7.45757	11.4121	2.31393e-14	4.11321e-12	3.48223e-12	ZWINT/SPC24/CCNB1/NDC80/CENPF/BUB1/AURKB/KNL1/BUB3/BIRC5/CDC20/SPC25/GEN1/MAD2L2/BUB1B/TPR/CDK5RAP2/TTK/MAD2L1/TRIP13/TOM1L1/CHEK1	22
GO:0090068	positive regulation of cell cycle process	48/995	263/18888	0.18251	3.46456	9.4912	3.262e-14	5.3315e-12	4.51364e-12	NUSAP1/UBE2C/CDK1/GPSM2/EGFR/CCNB1/CDC25B/NDC80/ESPL1/CIT/BUB1/AURKB/RRM2/CCNE2/SMC2/CHMP3/SMC4/KNL1/RHOA/BIRC5/CDC20/E2F8/DLGAP5/GEN1/APP/CDC25C/EZH2/RB1/NCAPH/E2F7/TPR/ECT2/RCC2/RAD51C/NCAPD2/MAD2L1/AKT1/FEN1/NUMA1/EGF/DBF4B/CDC7/FAM83D/MAPK15/RAD51AP1/CCNE1/CDCA5/RAD18	48
GO:0007094	mitotic spindle assembly checkpoint signaling	20/995	46/18888	0.434783	8.25344	11.6148	3.41299e-14	5.3315e-12	4.51364e-12	ZWINT/SPC24/CCNB1/NDC80/CENPF/BUB1/AURKB/KNL1/BUB3/BIRC5/CDC20/SPC25/GEN1/MAD2L2/BUB1B/TPR/CDK5RAP2/TTK/MAD2L1/TRIP13	20
GO:0071173	spindle assembly checkpoint signaling	20/995	46/18888	0.434783	8.25344	11.6148	3.41299e-14	5.3315e-12	4.51364e-12	ZWINT/SPC24/CCNB1/NDC80/CENPF/BUB1/AURKB/KNL1/BUB3/BIRC5/CDC20/SPC25/GEN1/MAD2L2/BUB1B/TPR/CDK5RAP2/TTK/MAD2L1/TRIP13	20
GO:0071174	mitotic spindle checkpoint signaling	20/995	46/18888	0.434783	8.25344	11.6148	3.41299e-14	5.3315e-12	4.51364e-12	ZWINT/SPC24/CCNB1/NDC80/CENPF/BUB1/AURKB/KNL1/BUB3/BIRC5/CDC20/SPC25/GEN1/MAD2L2/BUB1B/TPR/CDK5RAP2/TTK/MAD2L1/TRIP13	20
GO:0031577	spindle checkpoint signaling	20/995	47/18888	0.425532	8.07784	11.4564	5.6493e-14	8.56534e-12	7.2514e-12	ZWINT/SPC24/CCNB1/NDC80/CENPF/BUB1/AURKB/KNL1/BUB3/BIRC5/CDC20/SPC25/GEN1/MAD2L2/BUB1B/TPR/CDK5RAP2/TTK/MAD2L1/TRIP13	20
GO:0050000	chromosome localization	31/995	120/18888	0.258333	4.90392	10.1166	8.05827e-14	1.18687e-11	1.0048e-11	KIFC1/PSRC1/ZWINT/SPC24/CCNB1/NDC80/CENPF/AURKB/CENPE/CENPQ/CHMP3/KIF22/KNL1/BUB3/BIRC5/SPC25/DLGAP5/KNSTRN/LMNA/RB1/DSN1/NEK2/ECT2/RCC2/TTL/NUMA1/CDT1/FAM83D/CHMP1A/SKA1/CDCA5	31
GO:0033046	negative regulation of sister chromatid segregation	20/995	48/18888	0.416667	7.90955	11.3027	9.20886e-14	1.21722e-11	1.0305e-11	ZWINT/SPC24/CCNB1/NDC80/CENPF/BUB1/AURKB/KNL1/BUB3/BIRC5/CDC20/SPC25/GEN1/MAD2L2/BUB1B/TPR/CDK5RAP2/TTK/MAD2L1/TRIP13	20
GO:0033048	negative regulation of mitotic sister chromatid segregation	20/995	48/18888	0.416667	7.90955	11.3027	9.20886e-14	1.21722e-11	1.0305e-11	ZWINT/SPC24/CCNB1/NDC80/CENPF/BUB1/AURKB/KNL1/BUB3/BIRC5/CDC20/SPC25/GEN1/MAD2L2/BUB1B/TPR/CDK5RAP2/TTK/MAD2L1/TRIP13	20
GO:0045841	negative regulation of mitotic metaphase/anaphase transition	20/995	48/18888	0.416667	7.90955	11.3027	9.20886e-14	1.21722e-11	1.0305e-11	ZWINT/SPC24/CCNB1/NDC80/CENPF/BUB1/AURKB/KNL1/BUB3/BIRC5/CDC20/SPC25/GEN1/MAD2L2/BUB1B/TPR/CDK5RAP2/TTK/MAD2L1/TRIP13	20
GO:2000816	negative regulation of mitotic sister chromatid separation	20/995	48/18888	0.416667	7.90955	11.3027	9.20886e-14	1.21722e-11	1.0305e-11	ZWINT/SPC24/CCNB1/NDC80/CENPF/BUB1/AURKB/KNL1/BUB3/BIRC5/CDC20/SPC25/GEN1/MAD2L2/BUB1B/TPR/CDK5RAP2/TTK/MAD2L1/TRIP13	20
GO:0007052	mitotic spindle organization	32/995	131/18888	0.244275	4.63705	9.85041	1.73445e-13	2.23528e-11	1.89238e-11	KIFC1/PSRC1/GPSM2/TACC3/PRC1/CCNB1/NDC80/MYBL2/AURKB/DCTN1/FSD1/CENPE/CHMP3/RHOA/BIRC5/CDC20/SPC25/DLGAP5/MAP4/CKAP5/TPR/NEK2/TTK/CHEK2/PLK2/CENPH/NUMA1/CEP126/CHMP1A/VCP/KIFC2/DCTN6	32
GO:0051985	negative regulation of chromosome segregation	20/995	50/18888	0.4	7.59317	11.0081	2.34485e-13	2.81109e-11	2.37986e-11	ZWINT/SPC24/CCNB1/NDC80/CENPF/BUB1/AURKB/KNL1/BUB3/BIRC5/CDC20/SPC25/GEN1/MAD2L2/BUB1B/TPR/CDK5RAP2/TTK/MAD2L1/TRIP13	20
GO:1902100	negative regulation of metaphase/anaphase transition of cell cycle	20/995	50/18888	0.4	7.59317	11.0081	2.34485e-13	2.81109e-11	2.37986e-11	ZWINT/SPC24/CCNB1/NDC80/CENPF/BUB1/AURKB/KNL1/BUB3/BIRC5/CDC20/SPC25/GEN1/MAD2L2/BUB1B/TPR/CDK5RAP2/TTK/MAD2L1/TRIP13	20
GO:1905819	negative regulation of chromosome separation	20/995	50/18888	0.4	7.59317	11.0081	2.34485e-13	2.81109e-11	2.37986e-11	ZWINT/SPC24/CCNB1/NDC80/CENPF/BUB1/AURKB/KNL1/BUB3/BIRC5/CDC20/SPC25/GEN1/MAD2L2/BUB1B/TPR/CDK5RAP2/TTK/MAD2L1/TRIP13	20
GO:0051784	negative regulation of nuclear division	22/995	63/18888	0.349206	6.62895	10.5531	3.99927e-13	4.68551e-11	3.96674e-11	ZWINT/SPC24/CCNB1/NDC80/CENPF/BUB1/AURKB/KNL1/BUB3/BIRC5/CDC20/SPC25/GEN1/MAD2L2/BUB1B/TPR/CDK5RAP2/TTK/MAD2L1/TRIP13/TOM1L1/CHEK1	22
GO:0006261	DNA-templated DNA replication	35/995	160/18888	0.21875	4.15251	9.44327	4.31831e-13	4.94686e-11	4.188e-11	NUCKS1/MCM3/GINS1/ORC6/CCNE2/GINS4/MCM4/E2F8/MMS22L/PCNA/GEN1/SSBP1/RFWD3/TRAIP/RAD51/FAM111A/GINS3/E2F7/TK1/ZMPSTE24/MCM2/RFC2/CHTF18/FEN1/DBF4B/CDT1/CDC7/RFC4/MCM7/RPA1/BLM/CHRAC1/CCNE1/POLA2/CDC45	35
GO:0051303	establishment of chromosome localization	29/995	112/18888	0.258929	4.91522	9.79975	4.79879e-13	5.37778e-11	4.55281e-11	KIFC1/PSRC1/ZWINT/SPC24/CCNB1/NDC80/CENPF/AURKB/CENPE/CENPQ/CHMP3/KIF22/KNL1/BUB3/BIRC5/SPC25/KNSTRN/RB1/DSN1/NEK2/ECT2/RCC2/TTL/NUMA1/CDT1/FAM83D/CHMP1A/SKA1/CDCA5	29
GO:0051783	regulation of nuclear division	33/995	147/18888	0.22449	4.26147	9.36111	9.37089e-13	1.02781e-10	8.70139e-11	NUSAP1/UBE2C/ZWINT/SPC24/CCNB1/NDC80/CENPF/ESPL1/BUB1/AURKB/KNL1/BUB3/BIRC5/CDC20/SPC25/DLGAP5/GEN1/MAD2L2/CDC25C/RB1/BUB1B/MKI67/TPR/CDK5RAP2/NEK2/TTK/MAD2L1/TRIP13/TOM1L1/EGF/CHEK1/CDCA2/RAD51AP1	33
GO:0000075	cell cycle checkpoint signaling	38/995	191/18888	0.198953	3.77671	9.09519	9.98557e-13	1.07241e-10	9.07898e-11	CDK1/ZWINT/SPC24/CCNB1/NDC80/CENPF/BUB1/AURKB/E2F1/PRKDC/KNL1/BUB3/BIRC5/CDC20/SPC25/GEN1/RFWD3/MAD2L2/TP53/WDR76/RAD51/BUB1B/E2F7/TPR/CDK5RAP2/TTK/CHEK2/PLK2/TAOK2/MAD2L1/TRIP13/CLSPN/CDT1/CHEK1/RNASEH2B/BLM/CDC45/RPA2	38
GO:0007093	mitotic cell cycle checkpoint signaling	32/995	143/18888	0.223776	4.24792	9.19354	2.27178e-12	2.39e-10	2.02337e-10	CDK1/ZWINT/SPC24/CCNB1/NDC80/CENPF/BUB1/AURKB/PRKDC/KNL1/BUB3/BIRC5/CDC20/SPC25/GEN1/RFWD3/MAD2L2/TP53/BUB1B/E2F7/TPR/CDK5RAP2/TTK/CHEK2/PLK2/TAOK2/MAD2L1/TRIP13/CLSPN/CHEK1/BLM/RPA2	32
GO:0045787	positive regulation of cell cycle	51/995	332/18888	0.153614	2.91605	8.30587	5.23337e-12	5.39561e-10	4.56791e-10	NUSAP1/PSRC1/UBE2C/CDK1/GPSM2/EGFR/CCNB1/CDC25B/NDC80/ESPL1/CIT/BUB1/AURKB/RRM2/CCNE2/SMC2/CHMP3/SMC4/KNL1/RHOA/BIRC5/CDC20/E2F8/DLGAP5/GEN1/APP/CDC25C/EZH2/RB1/NCAPH/E2F7/TPR/ECT2/RCC2/RAD51C/NCAPD2/MAD2L1/AKT1/TTL/FEN1/NUMA1/EGF/DBF4B/CDC7/FAM83D/CHEK1/MAPK15/RAD51AP1/CCNE1/CDCA5/RAD18	51
GO:2001251	negative regulation of chromosome organization	25/995	93/18888	0.268817	5.10293	9.35333	7.90827e-12	7.99356e-10	6.76733e-10	TOP2A/ZWINT/SPC24/CCNB1/NDC80/CENPF/ESPL1/BUB1/AURKB/PIF1/KNL1/BUB3/BIRC5/CDC20/SPC25/GEN1/TEN1/MAD2L2/TP53/BUB1B/TPR/CDK5RAP2/TTK/MAD2L1/TRIP13	25
GO:0006302	double-strand break repair	48/995	312/18888	0.153846	2.92045	8.06595	2.10899e-11	2.09074e-09	1.77001e-09	HMGB2/FAN1/FUS/DEK/NUCKS1/MCM3/SFPQ/FOXM1/MORF4L1/GINS4/PRKDC/MCM4/MMS22L/GEN1/RFWD3/MAD2L2/TP53/RAD54L/SMARCA2/ESCO2/RAD51/ZGRF1/SMARCE1/MCM2/CHEK2/SPIRE1/RAD51C/RPA3/RNF138/TRIP13/SMARCC1/PBRM1/ACTL6A/FEN1/PARPBP/CDC7/BCL7B/RUVBL2/MCM7/CHEK1/RPA1/VCP/BLM/RAD51AP1/CDC45/CDCA5/RMI1/RPA2	48
GO:1901991	negative regulation of mitotic cell cycle phase transition	36/995	195/18888	0.184615	3.50454	8.29005	3.81617e-11	3.71177e-09	3.14237e-09	CDK1/ZWINT/SPC24/CCNB1/NDC80/CENPF/BUB1/AURKB/PRKDC/KNL1/BUB3/BIRC5/CDC20/SPC25/GEN1/RFWD3/MAD2L2/TP53/EZH2/RB1/BUB1B/E2F7/TPR/CDK5RAP2/TTK/CHEK2/PLK2/TAOK2/DLG1/MAD2L1/TRIP13/CLSPN/CTDSP2/CHEK1/BLM/RPA2	36
GO:0044786	cell cycle DNA replication	17/995	45/18888	0.377778	7.17132	9.77374	4.41159e-11	4.21143e-09	3.56539e-09	MCM3/GINS1/MCM4/E2F8/PCNA/RAD51/GINS3/E2F7/TK1/ZMPSTE24/MCM2/FEN1/DBF4B/CDT1/CDC7/BLM/CDC45	17
GO:0045930	negative regulation of mitotic cell cycle	41/995	248/18888	0.165323	3.1383	7.99326	6.40457e-11	6.00283e-09	5.08198e-09	CDK1/ZWINT/SPC24/EGFR/CCNB1/NDC80/CENPF/FZD3/BUB1/AURKB/PRKDC/KNL1/BUB3/BIRC5/CDC20/SPC25/GEN1/RFWD3/MAD2L2/TP53/EZH2/RB1/BUB1B/E2F7/TPR/CDK5RAP2/TTK/CHEK2/PLK2/TAOK2/CDKN1C/DLG1/MAD2L1/TRIP13/TOM1L1/CTNNB1/CLSPN/CTDSP2/CHEK1/BLM/RPA2	41
GO:1901988	negative regulation of cell cycle phase transition	43/995	273/18888	0.157509	2.98998	7.80999	1.09418e-10	1.00723e-08	8.52717e-09	CDK1/ZWINT/SPC24/CCNB1/NDC80/CENPF/BUB1/AURKB/E2F1/PRKDC/KNL1/BUB3/BIRC5/CDC20/SPC25/GEN1/RFWD3/MAD2L2/TP53/WDR76/EZH2/RB1/RAD51/BUB1B/E2F7/TPR/CDK5RAP2/TTK/CHEK2/PLK2/TAOK2/APBB2/DLG1/MAD2L1/TRIP13/CLSPN/CDT1/CTDSP2/CHEK1/RNASEH2B/BLM/CDC45/RPA2	43
GO:0010948	negative regulation of cell cycle process	47/995	316/18888	0.148734	2.82341	7.70814	1.11908e-10	1.01208e-08	8.56826e-09	CDK1/ZWINT/SPC24/CCNB1/NDC80/CENPF/ESPL1/BUB1/AURKB/E2F1/PRKDC/KNL1/BUB3/BIRC5/CDC20/E2F8/SPC25/GEN1/RFWD3/MAD2L2/TP53/WDR76/EZH2/RB1/RAD51/BUB1B/E2F7/TPR/CDK5RAP2/NEK2/TTK/CHEK2/PLK2/TAOK2/APBB2/DLG1/MAD2L1/TRIP13/TOM1L1/CLSPN/CDT1/CTDSP2/CHEK1/RNASEH2B/BLM/CDC45/RPA2	47
GO:0051960	regulation of nervous system development	60/995	468/18888	0.128205	2.43371	7.40611	1.55212e-10	1.37951e-08	1.16789e-08	ID4/VAX1/ANXA2/MDK/HMGB2/NRP1/HES6/SHTN1/NEFL/DLL3/PTPRS/SYT4/RELN/FLRT2/NRXN1/EGFR/ISLR2/SLITRK2/ROBO1/SLIT1/MAP6/B2M/FZD3/DCC/DLX1/DLX2/HAP1/CXCL12/DLL1/NTN1/SEMA5A/MT3/NKX6-2/SLIT2/ASPM/CXCR4/TP53/VCAN/EZH2/SLITRK6/RB1/FEZF2/PLXNA2/CTNNA1/TSPO/DBN1/DLG1/AKT1/NIN/SEMA3C/KIT/CTNNB1/EPHB1/TMEM98/CHODL/RNF10/DYNLT1/CERS2/FLRT3/DLG5	60
GO:0061640	cytoskeleton-dependent cytokinesis	26/995	117/18888	0.222222	4.21843	8.23463	3.06707e-10	2.67979e-08	2.2687e-08	SEPTIN11/CKAP2/NUSAP1/CFL1/MYH10/ESPL1/CIT/AURKB/CHMP3/RHOA/BIRC5/CEP55/EXOC7/SEPTIN5/CENPA/CNTROB/DCTN3/RHOC/SPIRE1/ECT2/EXOC5/SEPTIN10/CHMP1A/ANLN/WASHC5/IQGAP1	26
GO:0032392	DNA geometric change	22/995	85/18888	0.258824	4.91322	8.52672	3.16147e-10	2.71623e-08	2.29955e-08	TOP2A/HNRNPA2B1/HMGB2/MCM3/DHX9/GINS1/PIF1/GINS4/MCM4/SSBP1/DTD1/RAD51/GINS3/ZGRF1/MCM2/RFC2/CHTF18/RFC4/RUVBL2/MCM7/BLM/CDC45	22
GO:0007409	axonogenesis	58/995	455/18888	0.127473	2.4198	7.22914	3.95007e-10	3.33813e-08	2.82605e-08	VAX1/GAP43/NRP1/UCHL1/SHTN1/NEFL/PTPRS/AUTS2/RELN/FLRT2/NRXN1/POU3F2/ISLR2/SLITRK2/COBL/ROBO1/SLIT1/MAP6/FZD3/DCC/UNC5D/DLX5/CXCL12/NTN1/SEMA5A/NOTCH2/MT3/ETV1/NKX2-1/APP/EPHA5/SLIT2/SLITRK6/NTNG2/FEZF2/PLXNA2/KIAA1755/ARHGAP35/S100B/PLEKHG4B/TAOK2/APBB2/NIN/SEMA3C/BRSK2/TTL/NTN4/EPHB1/RAB8A/CHODL/KIF5C/ISL1/NFIB/PTCH1/FLRT3/UNC5B/NOTCH3/APOE	58
GO:0030900	forebrain development	54/995	408/18888	0.132353	2.51244	7.283	4.05419e-10	3.37086e-08	2.85376e-08	ID4/CDK6/MDK/NRP1/SOX1/NEFL/PTPRS/DCLK2/RELN/ARHGAP11B/LHX8/TACC3/EGFR/POU3F2/ZIC1/ROBO1/SLIT1/B2M/UBB/DPCD/DLX1/DLX2/HAP1/E2F1/DLX5/CXCL12/SEMA5A/RHOA/NKX2-1/APP/SIX3/EPHA5/SLIT2/ASPM/CXCR4/EMX2/SCN2A/FOXP1/EZH2/ZMIZ1/FEZF2/ARHGAP35/PCSK1/NIN/CCDC85C/TSC1/CTNNB1/ATAT1/NDST1/ISL1/NFIB/CRH/NOTCH3/ZIC3	54
GO:0008608	attachment of spindle microtubules to kinetochore	17/995	52/18888	0.326923	6.20595	8.8646	6.18541e-10	5.06123e-08	4.28483e-08	SPC24/CCNB1/NDC80/AURKB/CENPE/KNL1/BUB3/BIRC5/SPC25/KNSTRN/RB1/DSN1/NEK2/ECT2/RCC2/CDT1/SKA1	17
GO:1905820	positive regulation of chromosome separation	13/995	29/18888	0.448276	8.50958	9.54348	6.87117e-10	5.53451e-08	4.68551e-08	UBE2C/ESPL1/AURKB/SMC2/SMC4/BIRC5/CDC20/DLGAP5/RB1/NCAPH/NCAPD2/NUMA1/MAPK15	13
GO:0045786	negative regulation of cell cycle	53/995	405/18888	0.130864	2.48418	7.12001	8.90064e-10	7.05889e-08	5.97604e-08	CDK6/CDK1/ZWINT/SPC24/EGFR/CCNB1/NDC80/CENPF/FZD3/ESPL1/BUB1/AURKB/E2F1/PRKDC/KNL1/BUB3/BIRC5/CDC20/E2F8/SPC25/GEN1/RFWD3/MAD2L2/TP53/WDR76/EZH2/RB1/RAD51/BUB1B/E2F7/TPR/CDK5RAP2/NEK2/TTK/CHEK2/PLK2/TAOK2/APBB2/CDKN1C/DLG1/MAD2L1/TRIP13/TOM1L1/CTNNB1/CLSPN/CDT1/CTDSP2/CHEK1/TP53BP2/RNASEH2B/BLM/CDC45/RPA2	53
GO:0000910	cytokinesis	33/995	188/18888	0.175532	3.33211	7.57806	9.69482e-10	7.57224e-08	6.41064e-08	SEPTIN11/CKAP2/NUSAP1/CFL1/PRC1/MYH10/CDC25B/ESPL1/CIT/AURKB/FSD1/CHMP3/RHOA/BIRC5/E2F8/CEP55/EXOC7/SEPTIN5/CENPA/CNTROB/DCTN3/E2F7/RHOC/SPIRE1/ECT2/EXOC5/PRPF40A/SEPTIN10/CALM1/CHMP1A/ANLN/WASHC5/IQGAP1	33
GO:0033260	nuclear DNA replication	15/995	41/18888	0.365854	6.94497	8.98611	1.04923e-09	8.07278e-08	6.8344e-08	MCM3/GINS1/MCM4/PCNA/RAD51/GINS3/TK1/ZMPSTE24/MCM2/FEN1/DBF4B/CDT1/CDC7/BLM/CDC45	15
GO:0090329	regulation of DNA-templated DNA replication	16/995	48/18888	0.333333	6.32764	8.71498	1.42986e-09	1.07786e-07	9.12516e-08	MCM3/MCM4/E2F8/PCNA/SSBP1/E2F7/ZMPSTE24/MCM2/RFC2/CHTF18/DBF4B/CDT1/CDC7/RFC4/MCM7/BLM	16
GO:0000725	recombinational repair	32/995	181/18888	0.176796	3.3561	7.51072	1.44273e-09	1.07786e-07	9.12516e-08	FAN1/FUS/NUCKS1/MCM3/SFPQ/MORF4L1/GINS4/MCM4/MMS22L/GEN1/RFWD3/MAD2L2/RAD54L/RAD51/ZGRF1/MCM2/RAD51C/RPA3/RNF138/ACTL6A/FEN1/PARPBP/CDC7/RUVBL2/MCM7/CHEK1/RPA1/BLM/RAD51AP1/CDC45/RMI1/RPA2	32
GO:0071103	DNA conformation change	22/995	92/18888	0.23913	4.53939	8.02493	1.62383e-09	1.19583e-07	1.01239e-07	TOP2A/HNRNPA2B1/HMGB2/MCM3/DHX9/GINS1/PIF1/GINS4/MCM4/SSBP1/DTD1/RAD51/GINS3/ZGRF1/MCM2/RFC2/CHTF18/RFC4/RUVBL2/MCM7/BLM/CDC45	22
GO:0006268	DNA unwinding involved in DNA replication	11/995	21/18888	0.52381	9.94343	9.66972	1.77938e-09	1.29193e-07	1.09375e-07	MCM3/GINS1/GINS4/MCM4/SSBP1/RAD51/GINS3/MCM2/MCM7/BLM/CDC45	11
GO:0006275	regulation of DNA replication	26/995	128/18888	0.203125	3.8559	7.64511	2.40224e-09	1.71994e-07	1.45609e-07	NUCKS1/CDK1/EGFR/MCM3/DHX9/CCNA2/MCM4/E2F8/PCNA/SSBP1/TP53/ESCO2/E2F7/ZMPSTE24/MCM2/RFC2/ACTL6A/CHTF18/DBF4B/CDT1/CDC7/RFC4/RUVBL2/MCM7/BLM/CHRAC1	26
GO:0050767	regulation of neurogenesis	51/995	393/18888	0.129771	2.46343	6.91342	2.48372e-09	1.75392e-07	1.48486e-07	ID4/VAX1/ANXA2/MDK/HMGB2/NRP1/HES6/SHTN1/NEFL/DLL3/PTPRS/SYT4/RELN/EGFR/ISLR2/ROBO1/SLIT1/MAP6/B2M/FZD3/DCC/DLX1/DLX2/HAP1/CXCL12/DLL1/NTN1/SEMA5A/MT3/NKX6-2/SLIT2/ASPM/CXCR4/TP53/VCAN/EZH2/RB1/FEZF2/PLXNA2/CTNNA1/TSPO/DBN1/NIN/SEMA3C/KIT/CTNNB1/TMEM98/CHODL/RNF10/DYNLT1/CERS2	51
GO:0000724	double-strand break repair via homologous recombination	31/995	176/18888	0.176136	3.34358	7.36593	2.85529e-09	1.98906e-07	1.68393e-07	FAN1/FUS/NUCKS1/MCM3/SFPQ/MORF4L1/GINS4/MCM4/MMS22L/GEN1/RFWD3/MAD2L2/RAD54L/RAD51/MCM2/RAD51C/RPA3/RNF138/ACTL6A/FEN1/PARPBP/CDC7/RUVBL2/MCM7/CHEK1/RPA1/BLM/RAD51AP1/CDC45/RMI1/RPA2	31
GO:0032508	DNA duplex unwinding	20/995	79/18888	0.253165	4.8058	7.99334	3.06911e-09	2.1095e-07	1.7859e-07	TOP2A/MCM3/DHX9/GINS1/PIF1/GINS4/MCM4/SSBP1/DTD1/RAD51/GINS3/ZGRF1/MCM2/RFC2/CHTF18/RFC4/RUVBL2/MCM7/BLM/CDC45	20
GO:1901976	regulation of cell cycle checkpoint	15/995	44/18888	0.340909	6.47145	8.56828	3.27641e-09	2.22236e-07	1.88144e-07	ZWINT/CCNB1/NDC80/AURKB/KNL1/BIRC5/GEN1/RFWD3/WDR76/RAD51/TPR/CDK5RAP2/MAD2L1/RNASEH2B/RPA2	15
GO:0021761	limbic system development	25/995	125/18888	0.2	3.79658	7.39747	6.78833e-09	4.47104e-07	3.78517e-07	ID4/CDK6/MDK/NRP1/NEFL/PTPRS/DCLK2/RELN/POU3F2/ZIC1/UBB/DLX1/DLX2/HAP1/NKX2-1/EPHA5/EMX2/SCN2A/EZH2/FEZF2/TSC1/CTNNB1/ATAT1/CRH/ZIC3	25
GO:0007411	axon guidance	36/995	234/18888	0.153846	2.92045	6.97069	6.85183e-09	4.47104e-07	3.78517e-07	VAX1/GAP43/NRP1/RELN/FLRT2/NRXN1/ROBO1/SLIT1/FZD3/DCC/UNC5D/DLX5/CXCL12/NTN1/SEMA5A/NOTCH2/ETV1/NKX2-1/APP/EPHA5/SLIT2/FEZF2/KIAA1755/ARHGAP35/PLEKHG4B/APBB2/SEMA3C/NTN4/EPHB1/KIF5C/ISL1/NFIB/PTCH1/FLRT3/UNC5B/NOTCH3	36
GO:0097485	neuron projection guidance	36/995	234/18888	0.153846	2.92045	6.97069	6.85183e-09	4.47104e-07	3.78517e-07	VAX1/GAP43/NRP1/RELN/FLRT2/NRXN1/ROBO1/SLIT1/FZD3/DCC/UNC5D/DLX5/CXCL12/NTN1/SEMA5A/NOTCH2/ETV1/NKX2-1/APP/EPHA5/SLIT2/FEZF2/KIAA1755/ARHGAP35/PLEKHG4B/APBB2/SEMA3C/NTN4/EPHB1/KIF5C/ISL1/NFIB/PTCH1/FLRT3/UNC5B/NOTCH3	36
GO:0044771	meiotic cell cycle phase transition	9/995	15/18888	0.6	11.3897	9.49252	1.13214e-08	7.29521e-07	6.1761e-07	ZWINT/CCNB2/CDC25B/NDC80/KNL1/CDC20/CDC25C/TTK/MAPK15	9
GO:0051653	spindle localization	17/995	62/18888	0.274194	5.20499	7.82048	1.26533e-08	8.05279e-07	6.81748e-07	NUSAP1/GPSM2/CFL1/NDC80/ESPL1/DCTN1/MAP4/GJA1/CENPA/SAPCD2/ASPM/CDK5RAP2/SPIRE1/MAD2L1/NUMA1/HDAC3/DYNLT1	17
GO:0010639	negative regulation of organelle organization	47/995	365/18888	0.128767	2.44438	6.57086	1.34826e-08	8.47597e-07	7.17574e-07	TOP2A/TMSB4Y/TMSB10/TMSB15A/CKAP2/ZWINT/SPC24/CCNB1/PFN1/NDC80/CENPF/ESPL1/BUB1/AURKB/PIF1/CLIP3/KNL1/BUB3/BIRC5/CDC20/SPC25/MAP4/GEN1/TEN1/MAD2L2/TRIOBP/SLIT2/TP53/TBCD/LMNA/BUB1B/TPR/CDK5RAP2/TTK/CLU/TFRC/TSPO/MAD2L1/AKT1/TRIP13/TOM1L1/CORO2B/CHEK1/CAPG/HDGFL3/PRRT2/APC2	47
GO:0000723	telomere maintenance	28/995	158/18888	0.177215	3.36406	7.03671	1.44117e-08	8.95091e-07	7.57782e-07	HNRNPA2B1/HNRNPD/AURKB/PIF1/CCNE2/PRKDC/APEX1/PCNA/TEN1/GNL3/MAD2L2/TP53/RAD51/NEK2/RAD51C/RPA3/SMG1/ACTL6A/EXO1/CTNNB1/FEN1/RUVBL2/MAPK15/TCP1/RPA1/BLM/CCNE1/RPA2	28
GO:0000281	mitotic cytokinesis	20/995	88/18888	0.227273	4.3143	7.34862	2.26508e-08	1.39006e-06	1.17682e-06	CKAP2/NUSAP1/CFL1/MYH10/ESPL1/CIT/AURKB/CHMP3/RHOA/BIRC5/CEP55/EXOC7/CENPA/CNTROB/RHOC/ECT2/EXOC5/CHMP1A/ANLN/IQGAP1	20
GO:0051293	establishment of spindle localization	16/995	57/18888	0.280702	5.32854	7.7178	2.34571e-08	1.42261e-06	1.20437e-06	NUSAP1/GPSM2/CFL1/NDC80/ESPL1/DCTN1/MAP4/GJA1/CENPA/SAPCD2/CDK5RAP2/SPIRE1/MAD2L1/NUMA1/HDAC3/DYNLT1	16
GO:0044839	cell cycle G2/M phase transition	27/995	152/18888	0.177632	3.37197	6.92378	2.47139e-08	1.4814e-06	1.25415e-06	CDK6/NES/CDK1/CCNB2/CCNB1/CDC25B/NDC80/CCNA2/CENPF/FOXM1/AURKB/CDK3/APP/CDC25C/TP53/CHEK2/RCC2/TAOK2/RAD51C/BRSK2/CALM1/DBF4B/CLSPN/CDC7/CHEK1/RNASEH2B/BLM	27
GO:0051383	kinetochore organization	10/995	21/18888	0.47619	9.03948	8.69236	3.26152e-08	1.93255e-06	1.63609e-06	RNF4/NDC80/CENPF/CENPE/SMC2/SMC4/CENPK/DLGAP5/CENPA/CENPH	10
GO:1901989	positive regulation of cell cycle phase transition	23/995	117/18888	0.196581	3.73168	6.98926	3.80238e-08	2.22742e-06	1.88573e-06	UBE2C/CDK1/EGFR/CCNB1/CDC25B/ESPL1/RRM2/CCNE2/CDC20/DLGAP5/APP/CDC25C/EZH2/RB1/RCC2/RAD51C/AKT1/DBF4B/CDC7/FAM83D/MAPK15/CCNE1/CDCA5	23
GO:0051984	positive regulation of chromosome segregation	11/995	27/18888	0.407407	7.73378	8.25676	4.9089e-08	2.8433e-06	2.40713e-06	CDK1/CCNB1/AURKB/SMC2/SMC4/BIRC5/NCAPH/RCC2/NCAPD2/NUMA1/RAD18	11
GO:1902969	mitotic DNA replication	9/995	17/18888	0.529412	10.0498	8.80271	4.99562e-08	2.86138e-06	2.42244e-06	MCM3/GINS1/MCM4/RAD51/GINS3/TK1/ZMPSTE24/MCM2/CDC45	9
GO:0021537	telencephalon development	38/995	275/18888	0.138182	2.62309	6.39371	5.15486e-08	2.92014e-06	2.47219e-06	ID4/CDK6/MDK/NEFL/PTPRS/DCLK2/RELN/ARHGAP11B/TACC3/EGFR/POU3F2/ZIC1/ROBO1/DPCD/DLX1/DLX2/DLX5/CXCL12/RHOA/NKX2-1/SIX3/EPHA5/SLIT2/ASPM/CXCR4/EMX2/SCN2A/FOXP1/EZH2/ZMIZ1/FEZF2/NIN/CCDC85C/TSC1/CTNNB1/ATAT1/NFIB/ZIC3	38
GO:0090231	regulation of spindle checkpoint	10/995	22/18888	0.454545	8.6286	8.44243	5.69702e-08	3.19219e-06	2.7025e-06	ZWINT/CCNB1/NDC80/AURKB/KNL1/BIRC5/GEN1/TPR/CDK5RAP2/MAD2L1	10
GO:0032200	telomere organization	30/995	189/18888	0.15873	3.01316	6.55921	6.00314e-08	3.32755e-06	2.81709e-06	HNRNPA2B1/HNRNPD/HAT1/AURKB/PIF1/CCNE2/PRKDC/APEX1/PCNA/TEN1/GNL3/MAD2L2/TP53/EZH2/RAD51/NEK2/RAD51C/RPA3/SMG1/ACTL6A/EXO1/CTNNB1/FEN1/RUVBL2/MAPK15/TCP1/RPA1/BLM/CCNE1/RPA2	30
GO:0040001	establishment of mitotic spindle localization	13/995	40/18888	0.325	6.16945	7.71779	7.08573e-08	3.88584e-06	3.28975e-06	NUSAP1/GPSM2/NDC80/ESPL1/DCTN1/GJA1/CENPA/SAPCD2/CDK5RAP2/MAD2L1/NUMA1/HDAC3/DYNLT1	13
GO:0021543	pallium development	30/995	191/18888	0.157068	2.98161	6.49083	7.6429e-08	4.13522e-06	3.50087e-06	ID4/CDK6/MDK/NEFL/PTPRS/DCLK2/RELN/ARHGAP11B/TACC3/EGFR/POU3F2/ZIC1/ROBO1/DLX1/DLX2/RHOA/NKX2-1/EPHA5/SLIT2/ASPM/EMX2/SCN2A/EZH2/ZMIZ1/FEZF2/CCDC85C/TSC1/CTNNB1/ATAT1/ZIC3	30
GO:0034508	centromere complex assembly	11/995	28/18888	0.392857	7.45757	8.0636	7.70089e-08	4.13522e-06	3.50087e-06	RNF4/CENPF/CENPE/CENPK/DLGAP5/CENPA/RB1/CENPH/ITGB3BP/CENPO/CENPI	11
GO:0000086	G2/M transition of mitotic cell cycle	24/995	136/18888	0.176471	3.34993	6.48562	1.66315e-07	8.83868e-06	7.48281e-06	CDK6/NES/CDK1/CCNB1/CDC25B/CCNA2/CENPF/FOXM1/AURKB/CDK3/APP/CDC25C/CHEK2/RCC2/TAOK2/RAD51C/BRSK2/CALM1/DBF4B/CLSPN/CDC7/CHEK1/RNASEH2B/BLM	24
GO:1901992	positive regulation of mitotic cell cycle phase transition	20/995	99/18888	0.20202	3.83493	6.66899	1.82024e-07	9.57485e-06	8.10605e-06	UBE2C/CDK1/EGFR/CCNB1/CDC25B/ESPL1/RRM2/CCNE2/CDC20/DLGAP5/APP/CDC25C/RB1/RCC2/RAD51C/AKT1/DBF4B/CDC7/CCNE1/CDCA5	20
GO:0051054	positive regulation of DNA metabolic process	39/995	301/18888	0.129568	2.45958	6.01947	1.95771e-07	1.0194e-05	8.63018e-06	HNRNPA2B1/FUS/CDK1/EGFR/HNRNPD/DHX9/CCNA2/FOXM1/AURKB/MORF4L1/PRKDC/E2F8/PCNA/SSBP1/GNL3/MAD2L2/SMARCA2/RAD51/E2F7/SMARCE1/NEK2/SPIRE1/RFC2/TFRC/AKT1/SMARCC1/PBRM1/ACTL6A/CHTF18/CTNNB1/DBF4B/CDT1/CDC7/RFC4/BCL7B/RUVBL2/MAPK15/TCP1/RAD51AP1	39
GO:0006310	DNA recombination	42/995	339/18888	0.123894	2.35187	5.92277	2.33857e-07	1.20553e-05	1.0206e-05	TOP2A/HMGB2/FAN1/FUS/NUCKS1/MCM3/SFPQ/MORF4L1/PIF1/GINS4/PRKDC/APEX1/MCM4/MMS22L/GEN1/RFWD3/MAD2L2/RAD54L/RAD51/ZGRF1/MCM2/TFRC/RAD51C/RPA3/RNF138/TRIP13/ACTL6A/EXO1/SLC15A4/FEN1/PARPBP/CDC7/RUVBL2/MCM7/CHEK1/RPA1/BLM/RAD51AP1/NONO/CDC45/RMI1/RPA2	42
GO:0000082	G1/S transition of mitotic cell cycle	33/995	234/18888	0.141026	2.67708	6.08733	2.39128e-07	1.2205e-05	1.03327e-05	ID4/CDK6/CDK1/EGFR/CCNA2/RRM2/CDK3/CCNE2/E2F1/CDKN2C/CDKN3/PRKDC/PSME1/RFWD3/TP53/EZH2/SMARCA2/RB1/E2F7/SMARCE1/CHEK2/PLK2/DLG1/AKT1/SMARCC1/PBRM1/ACTL6A/PSME2/CDC7/BCL7B/CTDSP2/CCNE1/RPA2	33
GO:0051225	spindle assembly	23/995	129/18888	0.178295	3.38455	6.40838	2.47093e-07	1.24879e-05	1.05722e-05	KIFC1/GPSM2/CCNB2/PRC1/RNF4/NDC80/MYBL2/AURKB/CHMP3/RHOA/BIRC5/CDC20/TUBB/ASPM/TPR/NEK2/CHEK2/NUMA1/HDAC3/CHMP1A/MAPK15/WASHC5/KIFC2	23
GO:0050768	negative regulation of neurogenesis	25/995	149/18888	0.167785	3.18505	6.31442	2.53605e-07	1.26926e-05	1.07455e-05	ID4/VAX1/NRP1/DLL3/PTPRS/SYT4/SLIT1/B2M/DCC/DLX1/DLX2/NTN1/SEMA5A/MT3/NKX6-2/TP53/RB1/CTNNA1/TSPO/SEMA3C/CTNNB1/TMEM98/RNF10/DYNLT1/CERS2	25
GO:0001764	neuron migration	28/995	183/18888	0.153005	2.90449	6.10487	3.59388e-07	1.78139e-05	1.50812e-05	VAX1/GNRH1/MDK/NRP1/SHTN1/SOX1/AUTS2/RELN/FLRT2/FZD3/DCC/UNC5D/CXCL12/NTN1/RHOA/NKX2-1/GJA1/ASPM/CXCR4/EMX2/ZMIZ1/NTNG2/FEZF2/ABI2/APBB2/DNER/CTNNB1/CELSR1	28
GO:0021766	hippocampus development	19/995	94/18888	0.202128	3.83697	6.50221	3.64212e-07	1.78811e-05	1.51381e-05	ID4/CDK6/MDK/NEFL/PTPRS/DCLK2/RELN/ZIC1/DLX1/DLX2/NKX2-1/EPHA5/EMX2/SCN2A/EZH2/FEZF2/TSC1/ATAT1/ZIC3	19
GO:0044843	cell cycle G1/S phase transition	35/995	262/18888	0.133588	2.53589	5.90339	3.94702e-07	1.91952e-05	1.62506e-05	ID4/CDK6/CDK1/EGFR/MN1/CCNA2/RRM2/CDK3/CCNE2/E2F1/CDKN2C/CDKN3/PRKDC/PSME1/RFWD3/TP53/EZH2/SMARCA2/RB1/E2F7/SMARCE1/CHEK2/PLK2/DLG1/AKT1/SMARCC1/PBRM1/ACTL6A/PSME2/CDC7/FAM83D/BCL7B/CTDSP2/CCNE1/RPA2	35
GO:0090266	regulation of mitotic cell cycle spindle assembly checkpoint	9/995	21/18888	0.428571	8.13553	7.715	4.98645e-07	2.38011e-05	2.01499e-05	CCNB1/NDC80/AURKB/KNL1/BIRC5/GEN1/TPR/CDK5RAP2/MAD2L1	9
GO:1903504	regulation of mitotic spindle checkpoint	9/995	21/18888	0.428571	8.13553	7.715	4.98645e-07	2.38011e-05	2.01499e-05	CCNB1/NDC80/AURKB/KNL1/BIRC5/GEN1/TPR/CDK5RAP2/MAD2L1	9
GO:0051961	negative regulation of nervous system development	25/995	155/18888	0.16129	3.06176	6.07788	5.48901e-07	2.59595e-05	2.19772e-05	ID4/VAX1/NRP1/DLL3/PTPRS/SYT4/SLIT1/B2M/DCC/DLX1/DLX2/NTN1/SEMA5A/MT3/NKX6-2/TP53/RB1/CTNNA1/TSPO/SEMA3C/CTNNB1/TMEM98/RNF10/DYNLT1/CERS2	25
GO:0000727	double-strand break repair via break-induced replication	7/995	12/18888	0.583333	11.0734	8.23117	6.91607e-07	3.24112e-05	2.74393e-05	MCM3/GINS4/MCM4/MCM2/CDC7/MCM7/CDC45	7
GO:0042063	gliogenesis	41/995	346/18888	0.118497	2.24942	5.53121	1.05574e-06	4.89951e-05	4.14791e-05	ID4/VAX1/GAP43/CDK6/MDK/SOX1/CD9/CDK1/RELN/EGFR/POU3F2/MXRA8/GPC1/DLX1/DLX2/CDKN2C/DLL1/NTN1/RHOA/NKX2-1/NKX6-2/APP/CXCR4/TP53/CSF1/NDRG1/VCAN/EZH2/RB1/ZMIZ1/CLU/TSPO/AKT1/DNER/CTNNB1/TMEM98/RNF10/TSPAN2/NFIB/CERS2/GRN	41
GO:0000132	establishment of mitotic spindle orientation	11/995	35/18888	0.314286	5.96606	6.93437	1.06449e-06	4.89951e-05	4.14791e-05	GPSM2/NDC80/DCTN1/GJA1/CENPA/SAPCD2/CDK5RAP2/MAD2L1/NUMA1/HDAC3/DYNLT1	11
GO:0051294	establishment of spindle orientation	12/995	42/18888	0.285714	5.42369	6.76786	1.08804e-06	4.96359e-05	4.20216e-05	GPSM2/NDC80/DCTN1/MAP4/GJA1/CENPA/SAPCD2/CDK5RAP2/MAD2L1/NUMA1/HDAC3/DYNLT1	12
GO:1903046	meiotic cell cycle process	30/995	218/18888	0.137615	2.61233	5.64626	1.4083e-06	6.36824e-05	5.39133e-05	TOP2A/ZWINT/CCNB2/PTTG1/CDC25B/NDC80/UBB/ESPL1/CCNE2/SMC2/CKS2/SMC4/KNL1/CDC20/CDC25C/ASPM/RAD54L/RAD51/FANCA/NCAPH/TTK/SPIRE1/RAD51C/NCAPD2/TRIP13/MAPK15/RAD51AP1/WASHC5/CCNE1/RMI1	30
GO:0090232	positive regulation of spindle checkpoint	7/995	13/18888	0.538462	10.2216	7.84304	1.43012e-06	6.41067e-05	5.42726e-05	NDC80/AURKB/KNL1/BIRC5/GEN1/TPR/MAD2L1	7
GO:0140013	meiotic nuclear division	28/995	197/18888	0.142132	2.69808	5.64971	1.64316e-06	7.30216e-05	6.18199e-05	TOP2A/ZWINT/CCNB2/PTTG1/CDC25B/NDC80/UBB/ESPL1/CCNE2/SMC2/CKS2/SMC4/KNL1/CDC20/ASPM/RAD54L/RAD51/FANCA/NCAPH/TTK/SPIRE1/RAD51C/TRIP13/MAPK15/RAD51AP1/WASHC5/CCNE1/RMI1	28
GO:0051321	meiotic cell cycle	36/995	291/18888	0.123711	2.3484	5.46633	1.74142e-06	7.67265e-05	6.49565e-05	TOP2A/ZWINT/CCNB2/PTTG1/CDC25B/NDC80/UBB/ESPL1/CCNE2/SMC2/CKS2/SMC4/KNL1/BUB3/CDC20/CDC25C/ASPM/RAD54L/RAD51/FANCA/NCAPH/NEK2/TTK/SPIRE1/RAD51C/NCAPD2/TRIP13/EXO1/NUMA1/MAPK15/RPA1/RAD51AP1/WASHC5/CCNE1/MNS1/RMI1	36
GO:0034502	protein localization to chromosome	21/995	124/18888	0.169355	3.21485	5.83504	1.94567e-06	8.49995e-05	7.19604e-05	CDK1/RNF4/AURKB/CENPQ/TPP1/KNL1/BUB3/MMS22L/GNL3/CENPA/EZH2/ESCO2/RB1/BUB1B/TTK/RCC2/RUVBL2/TCP1/RPA1/VCP/RPA2	21
GO:0006270	DNA replication initiation	11/995	37/18888	0.297297	5.64357	6.6671	1.97952e-06	8.57513e-05	7.25969e-05	MCM3/ORC6/CCNE2/MCM4/GINS3/MCM2/CDT1/MCM7/CCNE1/POLA2/CDC45	11
GO:0021872	forebrain generation of neurons	13/995	54/18888	0.240741	4.56996	6.19499	3.28113e-06	0.000140952	0.000119329	NRP1/SOX1/DCLK2/LHX8/B2M/UBB/DLX1/DLX2/RHOA/NKX2-1/ASPM/ZMIZ1/FEZF2	13
GO:0051307	meiotic chromosome separation	6/995	10/18888	0.6	11.3897	7.74959	3.68253e-06	0.000156888	0.000132821	ZWINT/ESPL1/KNL1/NCAPH/TTK/MAPK15	6
GO:0045931	positive regulation of mitotic cell cycle	21/995	130/18888	0.161538	3.06647	5.57518	4.24323e-06	0.000179294	0.00015179	UBE2C/CDK1/EGFR/CCNB1/CDC25B/ESPL1/RRM2/CCNE2/CDC20/DLGAP5/APP/CDC25C/RB1/RCC2/RAD51C/AKT1/TTL/DBF4B/CDC7/CCNE1/CDCA5	21
GO:0048144	fibroblast proliferation	19/995	110/18888	0.172727	3.27887	5.65252	4.39167e-06	0.000182573	0.000154566	CDK6/CDK1/EGFR/CCNB1/DHX9/CCNA2/CKS1B/MIF/MORF4L1/E2F1/CKS2/E2F8/TP53/DAZAP1/ZMIZ1/ZMPSTE24/CTNNB1/FTH1/RNASEH2B	19
GO:2001252	positive regulation of chromosome organization	19/995	110/18888	0.172727	3.27887	5.65252	4.39167e-06	0.000182573	0.000154566	HNRNPA2B1/CDK1/HNRNPD/BUB1/AURKB/SMC2/SMC4/GNL3/NCAPH/TPR/NEK2/NCAPD2/ACTL6A/CTNNB1/FEN1/NUMA1/RUVBL2/MAPK15/TCP1	19
GO:2000045	regulation of G1/S transition of mitotic cell cycle	26/995	185/18888	0.140541	2.66787	5.37581	4.72452e-06	0.000194839	0.00016495	EGFR/RRM2/CCNE2/E2F1/CDKN2C/PRKDC/PSME1/RFWD3/TP53/EZH2/SMARCA2/RB1/E2F7/SMARCE1/CHEK2/PLK2/DLG1/AKT1/SMARCC1/PBRM1/ACTL6A/PSME2/BCL7B/CTDSP2/CCNE1/RPA2	26
GO:0034501	protein localization to kinetochore	7/995	15/18888	0.466667	8.85869	7.18004	4.88532e-06	0.000198298	0.000167879	CDK1/AURKB/CENPQ/KNL1/BUB3/TTK/RCC2	7
GO:1903083	protein localization to condensed chromosome	7/995	15/18888	0.466667	8.85869	7.18004	4.88532e-06	0.000198298	0.000167879	CDK1/AURKB/CENPQ/KNL1/BUB3/TTK/RCC2	7
GO:0045665	negative regulation of neuron differentiation	15/995	73/18888	0.205479	3.9006	5.85529	4.9304e-06	0.000198564	0.000168104	ID4/B2M/DLX1/DLX2/DLL1/PTBP1/APP/SIX3/ASPM/FEZF2/CDK5RAP2/DDX6/ZHX2/ISL1/NOTCH3	15
GO:1902806	regulation of cell cycle G1/S phase transition	28/995	211/18888	0.132701	2.51906	5.23256	6.37807e-06	0.000254876	0.000215777	EGFR/MN1/RRM2/CCNE2/E2F1/CDKN2C/PRKDC/PSME1/RFWD3/TP53/EZH2/SMARCA2/RB1/E2F7/SMARCE1/CHEK2/PLK2/DLG1/AKT1/SMARCC1/PBRM1/ACTL6A/PSME2/FAM83D/BCL7B/CTDSP2/CCNE1/RPA2	28
GO:0140694	non-membrane-bounded organelle assembly	44/995	413/18888	0.106538	2.02239	4.95395	7.35288e-06	0.00029157	0.000246842	CIRBP/KIFC1/GPSM2/CCNB2/RRP7A/PRC1/RNF4/TIA1/NDC80/LIMD1/MYBL2/CENPF/SQSTM1/G3BP2/AURKB/CENPE/CHMP3/CENPK/PRKDC/RHOA/BIRC5/CDC20/TUBB/DLGAP5/CENPA/CSRP1/ASPM/CNTROB/TPR/CDK5RAP2/NEK2/CHEK2/PLK2/CENPH/DDX6/PSPC1/NUMA1/HDAC3/CHMP1A/MAPK15/ANLN/WASHC5/CEP152/KIFC2	44
GO:0010389	regulation of G2/M transition of mitotic cell cycle	18/995	104/18888	0.173077	3.2855	5.51133	7.56796e-06	0.000297808	0.000252124	CDK6/CDK1/CCNB1/CDC25B/CENPF/AURKB/CDK3/APP/CDC25C/RCC2/TAOK2/RAD51C/DBF4B/CLSPN/CDC7/CHEK1/RNASEH2B/BLM	18
GO:0010971	positive regulation of G2/M transition of mitotic cell cycle	9/995	28/18888	0.321429	6.10165	6.37045	8.38575e-06	0.000327489	0.000277251	CDK1/CCNB1/CDC25B/APP/CDC25C/RCC2/RAD51C/DBF4B/CDC7	9
GO:1902749	regulation of cell cycle G2/M phase transition	19/995	116/18888	0.163793	3.10927	5.3735	9.77861e-06	0.000379013	0.000320872	CDK6/CDK1/CCNB1/CDC25B/CENPF/AURKB/CDK3/APP/CDC25C/TP53/RCC2/TAOK2/RAD51C/DBF4B/CLSPN/CDC7/CHEK1/RNASEH2B/BLM	19
GO:0070507	regulation of microtubule cytoskeleton organization	23/995	160/18888	0.14375	2.72879	5.17856	1.12915e-05	0.000434384	0.000367748	CKAP2/PSRC1/GPSM2/TACC3/RNF4/MAP6/DCTN1/FSD1/CLIP3/CHMP3/RHOA/CKAP5/TBCD/GBA2/TPR/CDK5RAP2/NUMA1/CHMP1A/MAPK15/ATAT1/SKA1/HDGFL3/APC2	23
GO:0007080	mitotic metaphase chromosome alignment	13/995	60/18888	0.216667	4.11296	5.69507	1.14037e-05	0.000435451	0.000368651	KIFC1/PSRC1/CCNB1/NDC80/AURKB/CENPE/CHMP3/KIF22/BIRC5/CDT1/CHMP1A/SKA1/CDCA5	13
GO:0000079	regulation of cyclin-dependent protein serine/threonine kinase activity	15/995	78/18888	0.192308	3.65056	5.53149	1.15718e-05	0.000438621	0.000371335	PSRC1/CCNI/CCNB2/EGFR/CCNB1/CCNA2/CCNE2/CDKN2C/CDKN3/CCNG2/CDC25C/CDKN1C/AKT1/BLM/CCNE1	15
GO:0061982	meiosis I cell cycle process	21/995	139/18888	0.151079	2.86792	5.21229	1.23989e-05	0.000466542	0.000394973	TOP2A/ZWINT/CCNB2/PTTG1/CDC25B/NDC80/UBB/ESPL1/CCNE2/CKS2/KNL1/CDC20/CDC25C/RAD54L/RAD51/RAD51C/TRIP13/MAPK15/RAD51AP1/CCNE1/RMI1	21
GO:0021879	forebrain neuron differentiation	11/995	44/18888	0.25	4.74573	5.8658	1.26474e-05	0.000472445	0.000399971	NRP1/SOX1/DCLK2/LHX8/B2M/UBB/DLX1/DLX2/NKX2-1/ZMIZ1/FEZF2	11
GO:0051382	kinetochore assembly	7/995	17/18888	0.411765	7.81649	6.6304	1.34516e-05	0.000498869	0.000422341	RNF4/CENPF/CENPE/CENPK/DLGAP5/CENPA/CENPH	7
GO:0051962	positive regulation of nervous system development	34/995	294/18888	0.115646	2.1953	4.87098	1.45401e-05	0.000535386	0.000453256	ID4/MDK/NRP1/SHTN1/NEFL/RELN/FLRT2/NRXN1/EGFR/ISLR2/SLITRK2/ROBO1/MAP6/FZD3/HAP1/CXCL12/NTN1/SEMA5A/NKX6-2/SLIT2/ASPM/CXCR4/VCAN/SLITRK6/PLXNA2/TSPO/DBN1/NIN/KIT/CTNNB1/EPHB1/CHODL/FLRT3/DLG5	34
GO:0090267	positive regulation of mitotic cell cycle spindle assembly checkpoint	6/995	12/18888	0.5	9.49146	6.93856	1.47868e-05	0.000536804	0.000454457	NDC80/AURKB/BIRC5/GEN1/TPR/MAD2L1	6
GO:1901993	regulation of meiotic cell cycle phase transition	6/995	12/18888	0.5	9.49146	6.93856	1.47868e-05	0.000536804	0.000454457	ZWINT/CDC25B/KNL1/CDC25C/TTK/MAPK15	6
GO:0014014	negative regulation of gliogenesis	11/995	45/18888	0.244444	4.64027	5.76522	1.59485e-05	0.000574925	0.00048673	ID4/DLX1/DLX2/NKX6-2/TP53/RB1/TSPO/CTNNB1/TMEM98/RNF10/CERS2	11
GO:1904029	regulation of cyclin-dependent protein kinase activity	15/995	81/18888	0.185185	3.51535	5.34975	1.86107e-05	0.000666236	0.000564033	PSRC1/CCNI/CCNB2/EGFR/CCNB1/CCNA2/CCNE2/CDKN2C/CDKN3/CCNG2/CDC25C/CDKN1C/AKT1/BLM/CCNE1	15
GO:0010001	glial cell differentiation	31/995	260/18888	0.119231	2.26335	4.83702	1.88106e-05	0.00066875	0.000566162	ID4/VAX1/GAP43/CDK6/MDK/SOX1/CDK1/RELN/EGFR/POU3F2/MXRA8/GPC1/DLX1/DLX2/CDKN2C/DLL1/RHOA/NKX2-1/NKX6-2/APP/CXCR4/NDRG1/VCAN/CLU/AKT1/DNER/CTNNB1/TMEM98/TSPAN2/NFIB/GRN	31
GO:0021885	forebrain cell migration	13/995	63/18888	0.206349	3.91711	5.46899	1.99521e-05	0.000700343	0.000592909	RELN/EGFR/POU3F2/ROBO1/CXCL12/RHOA/NKX2-1/SLIT2/CXCR4/EMX2/ZMIZ1/FEZF2/CTNNB1	13
GO:0090224	regulation of spindle organization	11/995	46/18888	0.23913	4.53939	5.66755	1.9971e-05	0.000700343	0.000592909	PSRC1/GPSM2/TACC3/RNF4/DCTN1/FSD1/CHMP3/TPR/NUMA1/CHMP1A/MAPK15	11
GO:0050803	regulation of synapse structure or activity	30/995	249/18888	0.120482	2.2871	4.82116	2.08558e-05	0.000726428	0.000614993	SEPTIN11/PTPRT/NEFL/PTPRS/RELN/FLRT2/CFL1/NRXN1/SLITRK2/SLIT1/DCTN1/NTN1/RHOA/CDC20/TUBB/APP/SLITRK6/NTNG2/ABI2/DBN1/PPT1/AKT1/OGT/GRIN2B/CTNNB1/EPHB1/VCP/FLRT3/APOE/DLG5	30
GO:1901970	positive regulation of mitotic sister chromatid separation	7/995	18/18888	0.388889	7.38224	6.38815	2.10113e-05	0.000726934	0.000615421	UBE2C/ESPL1/AURKB/BIRC5/CDC20/DLGAP5/RB1	7
GO:1902751	positive regulation of cell cycle G2/M phase transition	9/995	31/18888	0.290323	5.51117	5.92768	2.12153e-05	0.000729101	0.000617255	CDK1/CCNB1/CDC25B/APP/CDC25C/RCC2/RAD51C/DBF4B/CDC7	9
GO:0048024	regulation of mRNA splicing, via spliceosome	18/995	112/18888	0.160714	3.05083	5.13319	2.17234e-05	0.000741615	0.00062785	HNRNPA2B1/HNRNPK/CIRBP/SRSF2/HNRNPL/TIA1/NOVA1/DDX17/RBM8A/SF1/SRSF3/PTBP1/RBM15B/TRA2A/CLNS1A/SF3B4/DAZAP1/LARP7	18
GO:0061351	neural precursor cell proliferation	23/995	167/18888	0.137725	2.61441	4.94151	2.29023e-05	0.000775926	0.000656897	ID4/VAX1/MDK/NES/POU3F2/FZD3/ZNF503/RHOA/SHCBP1/SIX3/ASPM/EMX2/FZD6/TP53/VCAN/FOXO1/CTNNA1/DBN1/DAGLA/CTNNB1/EPHB1/EGF/NFIB	23
GO:0048588	developmental cell growth	29/995	238/18888	0.121849	2.31304	4.80706	2.30294e-05	0.000775926	0.000656897	NRP1/MEX3C/SHTN1/PTPRS/SYT4/AUTS2/ISLR2/COBL/SLIT1/DCC/CXCL12/NTN1/SEMA5A/MT3/APP/SLIT2/CXCR4/FOXP1/G6PD/S100B/NIN/SEMA3C/TTL/CTNNB1/RGS2/FLRT3/IQGAP1/PAK6/APOE	29
GO:0007143	female meiotic nuclear division	10/995	39/18888	0.25641	4.86741	5.70112	2.46837e-05	0.000826263	0.000699512	TOP2A/CCNB2/CDC25B/NDC80/UBB/NCAPH/TTK/SPIRE1/TRIP13/WASHC5	10
GO:0045132	meiotic chromosome segregation	16/995	93/18888	0.172043	3.26588	5.16545	2.58956e-05	0.000861237	0.000729121	ZWINT/CCNB2/PTTG1/NDC80/ESPL1/CCNE2/SMC2/SMC4/KNL1/ASPM/NCAPH/TTK/TRIP13/MAPK15/WASHC5/CCNE1	16
GO:0048732	gland development	45/995	449/18888	0.100223	1.90252	4.56418	2.72884e-05	0.000896863	0.000759282	ID4/MDK/NRP1/UCP2/PSAP/CCNB2/FASN/EGFR/POU3F2/COBL/HNRNPD/ROBO1/DUT/NTN1/NOTCH2/E2F8/TYMS/CADM1/PCNA/NKX2-1/GJA1/SIX3/TNC/ZNF703/ASXL1/ONECUT2/CSF1/EZH2/E2F7/ARHGAP35/ZMPSTE24/PCSK1/TSPO/CDKN1C/AKT1/SMARCC1/SEMA3C/NTN4/CTNNB1/EGF/ISL1/NFIB/PTCH1/CRH/ZIC3	45
GO:0048663	neuron fate commitment	14/995	74/18888	0.189189	3.59136	5.2669	2.73147e-05	0.000896863	0.000759282	SOX1/POU3F2/DLX1/ZNF521/DLX2/DLL1/NKX2-1/NKX6-2/FOXN4/FEZF2/CTNNB1/ISL1/NFIB/NOTCH3	14
GO:0051402	neuron apoptotic process	33/995	292/18888	0.113014	2.14533	4.65118	3.09263e-05	0.00100902	0.000854233	GRIK2/MDK/NRP1/NES/NEFL/UCP2/MYBL2/UBB/NQO1/CIT/FAM162A/GPI/DLX1/RHOA/SET/MT3/APP/ATF4/TP53/SCN2A/G6PD/RB1/CLU/PPT1/DIO3/CTNNB1/ISL1/CRH/NONO/PLA2G3/GRN/UNC5B/RETREG1	33
GO:0071459	protein localization to chromosome, centromeric region	10/995	40/18888	0.25	4.74573	5.59223	3.13691e-05	0.00101682	0.000860839	CDK1/AURKB/CENPQ/KNL1/BUB3/CENPA/RB1/BUB1B/TTK/RCC2	10
GO:0007076	mitotic chromosome condensation	7/995	19/18888	0.368421	6.99371	6.16381	3.17572e-05	0.00101682	0.000860839	NUSAP1/SMC2/SMC4/NCAPH/NCAPD2/CHMP1A/CDCA5	7
GO:1901978	positive regulation of cell cycle checkpoint	7/995	19/18888	0.368421	6.99371	6.16381	3.17572e-05	0.00101682	0.000860839	NDC80/AURKB/KNL1/BIRC5/GEN1/TPR/MAD2L1	7
GO:0019693	ribose phosphate metabolic process	47/995	480/18888	0.0979167	1.85874	4.49399	3.28392e-05	0.00104498	0.000884674	ENO2/PKM/UCP2/ELOVL6/DPYD/PID1/AASS/GPI/NDUFS6/NDUFA1/PGAM1/PRKACA/APP/PYGL/HINT1/G6PD/PRPSAP1/NDUFB8/MVD/ADK/ATP5MC3/GNAI3/CROT/HKDC1/SLC25A13/TSPO/ALDOC/PPT1/DLG1/NDUFS8/DLG2/OGT/NUDT5/SLC4A4/ATP5IF1/ENO4/NDUFC2/PANK3/ELOVL1/RNASEH2B/VCP/CMPK1/DLST/MCCC2/AK5/GTPBP1/ACOT7	47
GO:0050807	regulation of synapse organization	29/995	243/18888	0.119342	2.26545	4.68186	3.39856e-05	0.00107482	0.000909941	SEPTIN11/PTPRT/NEFL/PTPRS/RELN/FLRT2/CFL1/NRXN1/SLITRK2/SLIT1/DCTN1/NTN1/RHOA/CDC20/TUBB/APP/SLITRK6/NTNG2/ABI2/DBN1/AKT1/OGT/GRIN2B/CTNNB1/EPHB1/VCP/FLRT3/APOE/DLG5	29
GO:0036297	interstrand cross-link repair	10/995	41/18888	0.243902	4.62998	5.48689	3.95446e-05	0.001243	0.00105232	FAN1/NUCKS1/RFWD3/RAD51/FANCA/FANCI/FANCL/FANCC/VCP/RAD51AP1	10
GO:0008380	RNA splicing	47/995	484/18888	0.0971074	1.84338	4.43244	4.03878e-05	0.00126098	0.00106755	HNRNPA2B1/HNRNPK/CIRBP/LGALS3/FUS/SRSF2/SNU13/HNRNPL/SNRPB/TIA1/NOVA1/DHX9/DDX17/SFPQ/RBM8A/SF1/SRSF3/CCNL2/PTBP1/RBM15B/TRA2A/CLNS1A/SF3B4/DAZAP1/SNRNP40/KHSRP/PPIE/TCERG1/LARP7/SNRPD2/ILDR2/PRPF40A/DCPS/TSEN34/SNRPN/DDX39B/UBL5/MBNL1/SNRPG/CD2BP2/AFF2/SNRPC/NONO/ALYREF/EIF4A3/SRSF5/RBM38	47
GO:0060562	epithelial tube morphogenesis	36/995	335/18888	0.107463	2.03995	4.52878	4.06059e-05	0.00126098	0.00106755	MDK/NRP1/PFN1/COBL/FZD3/TEAD2/PPP1CA/CLIC4/CSNK2B/DLL1/NTN1/NOTCH2/RHOA/NKX2-1/PRKACA/GJA1/TNC/SLIT2/CXCR4/FZD6/CSF1/FOXP1/FOXN4/NPNT/CTNNBIP1/ARHGAP35/DVL2/DLG1/TSC1/CTNNB1/EGF/PTCH1/CELSR1/ZIC3/FUZ/DLG5	36
GO:0009263	deoxyribonucleotide biosynthetic process	6/995	14/18888	0.428571	8.13553	6.29811	4.38647e-05	0.00132235	0.0011195	RRM2/DUT/TYMS/SHMT1/ADK/AK5	6
GO:0009265	2'-deoxyribonucleotide biosynthetic process	6/995	14/18888	0.428571	8.13553	6.29811	4.38647e-05	0.00132235	0.0011195	RRM2/DUT/TYMS/SHMT1/ADK/AK5	6
GO:0046385	deoxyribose phosphate biosynthetic process	6/995	14/18888	0.428571	8.13553	6.29811	4.38647e-05	0.00132235	0.0011195	RRM2/DUT/TYMS/SHMT1/ADK/AK5	6
GO:0048715	negative regulation of oligodendrocyte differentiation	6/995	14/18888	0.428571	8.13553	6.29811	4.38647e-05	0.00132235	0.0011195	ID4/DLX1/DLX2/NKX6-2/CTNNB1/TMEM98	6
GO:2000105	positive regulation of DNA-templated DNA replication	6/995	14/18888	0.428571	8.13553	6.29811	4.38647e-05	0.00132235	0.0011195	E2F8/SSBP1/E2F7/DBF4B/CDT1/CDC7	6
GO:0043484	regulation of RNA splicing	24/995	186/18888	0.129032	2.44941	4.68441	4.53909e-05	0.00136041	0.00115172	HNRNPA2B1/HNRNPK/CIRBP/FUS/SRSF2/HNRNPL/TIA1/NOVA1/DDX17/RBM8A/SF1/SRSF3/CCNL2/PTBP1/RBM15B/TRA2A/CLNS1A/SF3B4/DAZAP1/LARP7/ILDR2/MBNL1/AFF2/RBM38	24
GO:0009185	ribonucleoside diphosphate metabolic process	18/995	120/18888	0.15	2.84744	4.78743	5.59672e-05	0.00166769	0.00141187	ENO2/PKM/UCP2/RRM2/GPI/PGAM1/PRKACA/APP/HKDC1/ALDOC/DLG1/DLG2/OGT/NUDT5/SLC4A4/ENO4/CMPK1/AK5	18
GO:0016054	organic acid catabolic process	29/995	250/18888	0.116	2.20202	4.51162	5.72687e-05	0.00167855	0.00142106	ETFB/ARHGAP11B/ACAT2/AASS/GAD1/DCXR/MTLN/RENBP/GLUL/CRYM/ECHDC2/GPT2/PLIN5/SHMT1/FAH/CROT/GNPDA1/HADHA/NAGK/AMDHD2/ALDH8A1/AKT1/LPIN3/SCP2/ECHS1/DLST/DECR1/MCCC2/ACOT7	29
GO:0046395	carboxylic acid catabolic process	29/995	250/18888	0.116	2.20202	4.51162	5.72687e-05	0.00167855	0.00142106	ETFB/ARHGAP11B/ACAT2/AASS/GAD1/DCXR/MTLN/RENBP/GLUL/CRYM/ECHDC2/GPT2/PLIN5/SHMT1/FAH/CROT/GNPDA1/HADHA/NAGK/AMDHD2/ALDH8A1/AKT1/LPIN3/SCP2/ECHS1/DLST/DECR1/MCCC2/ACOT7	29
GO:0022029	telencephalon cell migration	12/995	60/18888	0.2	3.79658	5.11626	5.73085e-05	0.00167855	0.00142106	RELN/EGFR/POU3F2/ROBO1/CXCL12/RHOA/NKX2-1/SLIT2/CXCR4/ZMIZ1/FEZF2/CTNNB1	12
GO:0000375	RNA splicing, via transesterification reactions	36/995	341/18888	0.105572	2.00406	4.41217	5.88597e-05	0.00171425	0.00145128	HNRNPA2B1/HNRNPK/CIRBP/SRSF2/SNU13/HNRNPL/SNRPB/TIA1/NOVA1/DHX9/DDX17/SFPQ/RBM8A/SF1/SRSF3/PTBP1/RBM15B/TRA2A/CLNS1A/SF3B4/DAZAP1/SNRNP40/KHSRP/PPIE/LARP7/SNRPD2/PRPF40A/DCPS/SNRPN/DDX39B/UBL5/SNRPG/CD2BP2/SNRPC/EIF4A3/SRSF5	36
GO:0032506	cytokinetic process	10/995	43/18888	0.232558	4.41463	5.28605	6.14466e-05	0.00176959	0.00149813	AURKB/CHMP3/RHOA/CEP55/CNTROB/SPIRE1/ECT2/CHMP1A/ANLN/IQGAP1	10
GO:0045740	positive regulation of DNA replication	10/995	43/18888	0.232558	4.41463	5.28605	6.14466e-05	0.00176959	0.00149813	CDK1/EGFR/DHX9/E2F8/PCNA/SSBP1/E2F7/DBF4B/CDT1/CDC7	10
GO:2000779	regulation of double-strand break repair	19/995	132/18888	0.143939	2.73239	4.70992	6.26838e-05	0.0017952	0.00151981	FUS/DEK/FOXM1/MORF4L1/PRKDC/MAD2L2/SMARCA2/RAD51/SMARCE1/SPIRE1/SMARCC1/PBRM1/ACTL6A/PARPBP/BCL7B/RUVBL2/CHEK1/RAD51AP1/RPA2	19
GO:0050808	synapse organization	47/995	493/18888	0.0953347	1.80973	4.29601	6.35137e-05	0.00180891	0.00153142	GAP43/SEPTIN11/NRP1/PTPRT/FZD5/NEFL/PTPRS/GABRB2/RELN/FLRT2/CFL1/CAST/NRXN1/SLITRK2/PFN1/SLIT1/DCTN1/NTN1/RHOA/CDC20/TUBB/APP/TNC/GABRA1/SLC6A1/LGI2/SLITRK6/NTNG2/ABI2/GNPAT/APBB2/CHRNA7/DBN1/DLG1/AKT1/DNER/OGT/GABRG2/GRIN2B/TSC1/CTNNB1/EPHB1/ACTN1/VCP/FLRT3/APOE/DLG5	47
GO:0051988	regulation of attachment of spindle microtubules to kinetochore	7/995	21/18888	0.333333	6.32764	5.76029	6.67887e-05	0.00189173	0.00160154	CCNB1/AURKB/BIRC5/KNSTRN/NEK2/ECT2/RCC2	7
GO:0006271	DNA strand elongation involved in DNA replication	6/995	15/18888	0.4	7.59317	6.0238	6.98509e-05	0.00195696	0.00165676	MCM3/GINS1/MCM4/PCNA/RFC4/MCM7	6
GO:1902101	positive regulation of metaphase/anaphase transition of cell cycle	6/995	15/18888	0.4	7.59317	6.0238	6.98509e-05	0.00195696	0.00165676	UBE2C/ESPL1/CDC20/DLGAP5/RB1/MAPK15	6
GO:0050770	regulation of axonogenesis	21/995	156/18888	0.134615	2.55539	4.60004	7.17962e-05	0.00200059	0.0016937	NRP1/SHTN1/NEFL/PTPRS/POU3F2/ISLR2/ROBO1/SLIT1/MAP6/DCC/CXCL12/NTN1/SEMA5A/MT3/SLIT2/PLXNA2/ARHGAP35/NIN/SEMA3C/BRSK2/CHODL	21
GO:0009141	nucleoside triphosphate metabolic process	30/995	266/18888	0.112782	2.14093	4.41914	7.2464e-05	0.00200834	0.00170026	ENO2/PKM/UCP2/PID1/GPI/DUT/NDUFS6/NDUFA1/TYMS/PGAM1/PRKACA/APP/NDUFB8/ADK/ATP5MC3/GNAI3/HKDC1/SLC25A13/TSPO/ALDOC/NDUFS8/OGT/NUDT5/SLC4A4/ATP5IF1/ENO4/NDUFC2/VCP/AK5/GTPBP1	30
GO:0016049	cell growth	47/995	496/18888	0.0947581	1.79878	4.25116	7.35757e-05	0.00202825	0.00171711	NRP1/MEX3C/SHTN1/PSRC1/PTPRS/SYT4/AUTS2/EGFR/ISLR2/COBL/SLIT1/DCC/CDKN2C/CXCL12/NTN1/SEMA5A/MT3/GJA1/APP/TNC/MAD2L2/SLIT2/SGK3/CXCR4/TP53/FOXP1/SMARCA2/G6PD/EXOSC2/RB1/TSG101/SH3BP4/S100B/TAOK2/PPT1/IGFBP7/AKT1/NIN/SEMA3C/TTL/CTNNB1/RGS2/FLRT3/IQGAP1/LAMTOR1/PAK6/APOE	47
GO:0071897	DNA biosynthetic process	24/995	192/18888	0.125	2.37286	4.50874	7.57462e-05	0.00207698	0.00175836	HNRNPA2B1/HNRNPD/CCNA2/CENPF/AURKB/PIF1/TYMS/PCNA/TEN1/MAD2L2/PCLAF/TP53/TK1/NEK2/RFC2/CHTF18/CTNNB1/RFC4/CHEK1/MAPK15/TCP1/RPA1/VCP/CHRAC1	24
GO:0050684	regulation of mRNA processing	19/995	134/18888	0.141791	2.69161	4.634	7.71562e-05	0.00210444	0.00178162	HNRNPA2B1/HNRNPK/CIRBP/SRSF2/HNRNPL/TIA1/NOVA1/DHX9/DDX17/RBM8A/SF1/SRSF3/PTBP1/RBM15B/TRA2A/CLNS1A/SF3B4/DAZAP1/LARP7	19
GO:0031346	positive regulation of cell projection organization	37/995	360/18888	0.102778	1.95102	4.29614	8.21508e-05	0.00222888	0.00188696	DPYSL3/GPC2/ENC1/MDK/NRP1/SHTN1/NEFL/AUTS2/RELN/ISLR2/PFN1/COBL/FNBP1L/ROBO1/MAP6/HAP1/CXCL12/NTN1/SEMA5A/SLIT2/EZH2/PLXNA2/ABI2/ARHGAP35/DBN1/DVL2/NIN/KIT/RGS2/CHODL/ANLN/WASHC5/PLA2G3/GRN/MNS1/APOE/FUZ	37
GO:0007264	small GTPase-mediated signal transduction	47/995	500/18888	0.094	1.78439	4.19183	8.92526e-05	0.00240888	0.00203936	COL1A2/NRP1/SHTN1/AUTS2/PSD3/RELN/ARHGAP11B/ABR/CFL1/ABCA1/ROBO1/CCNA2/SQSTM1/G3BP2/FOXM1/DOCK1/GNB1/ARHGAP11A/CYTH2/NTN1/NOTCH2/RHOA/SLIT2/MADD/TP53/CSF1/GIT2/RB1/CTNNAL1/RASGEF1B/CHUK/ABI2/ARHGAP35/RHOC/PLK2/PLEKHG4B/ECT2/DHCR24/HACD3/RIT1/DENND1A/OGT/CCDC88C/KCTD10/RABL3/CELSR1/APOE	47
GO:0022616	DNA strand elongation	9/995	37/18888	0.243243	4.61747	5.19385	9.84243e-05	0.00264259	0.00223721	NUCKS1/MCM3/GINS1/MCM4/PCNA/ACTL6A/RFC4/RUVBL2/MCM7	9
GO:0032886	regulation of microtubule-based process	29/995	258/18888	0.112403	2.13374	4.32382	0.000100796	0.00268209	0.00227065	CKAP2/PSRC1/GPSM2/TACC3/LAMP1/RNF4/MAP6/DCTN1/FSD1/HAP1/CLIP3/CHMP3/CCNL2/RHOA/DNAH11/GEN1/CKAP5/TBCD/GBA2/TPR/CDK5RAP2/PLK2/NUMA1/CHMP1A/MAPK15/ATAT1/SKA1/HDGFL3/APC2	29
GO:0090307	mitotic spindle assembly	13/995	73/18888	0.178082	3.38052	4.80543	0.000100936	0.00268209	0.00227065	KIFC1/PRC1/MYBL2/AURKB/CHMP3/RHOA/BIRC5/CDC20/TPR/NEK2/CHEK2/CHMP1A/KIFC2	13
GO:0000377	RNA splicing, via transesterification reactions with bulged adenosine as nucleophile	35/995	337/18888	0.103858	1.97152	4.2436	0.000102942	0.00270748	0.00229215	HNRNPA2B1/HNRNPK/CIRBP/SRSF2/SNU13/HNRNPL/SNRPB/TIA1/NOVA1/DHX9/DDX17/SFPQ/RBM8A/SF1/SRSF3/PTBP1/RBM15B/TRA2A/CLNS1A/SF3B4/DAZAP1/SNRNP40/PPIE/LARP7/SNRPD2/PRPF40A/DCPS/SNRPN/DDX39B/UBL5/SNRPG/CD2BP2/SNRPC/EIF4A3/SRSF5	35
GO:0000398	mRNA splicing, via spliceosome	35/995	337/18888	0.103858	1.97152	4.2436	0.000102942	0.00270748	0.00229215	HNRNPA2B1/HNRNPK/CIRBP/SRSF2/SNU13/HNRNPL/SNRPB/TIA1/NOVA1/DHX9/DDX17/SFPQ/RBM8A/SF1/SRSF3/PTBP1/RBM15B/TRA2A/CLNS1A/SF3B4/DAZAP1/SNRNP40/PPIE/LARP7/SNRPD2/PRPF40A/DCPS/SNRPN/DDX39B/UBL5/SNRPG/CD2BP2/SNRPC/EIF4A3/SRSF5	35
GO:0009132	nucleoside diphosphate metabolic process	18/995	127/18888	0.141732	2.69049	4.50753	0.000118655	0.00308922	0.00261532	ENO2/PKM/UCP2/RRM2/GPI/PGAM1/PRKACA/APP/HKDC1/ALDOC/DLG1/DLG2/OGT/NUDT5/SLC4A4/ENO4/CMPK1/AK5	18
GO:0021987	cerebral cortex development	18/995	127/18888	0.141732	2.69049	4.50753	0.000118655	0.00308922	0.00261532	MDK/NEFL/PTPRS/RELN/ARHGAP11B/TACC3/EGFR/POU3F2/ROBO1/RHOA/NKX2-1/SLIT2/ASPM/EMX2/ZMIZ1/CCDC85C/TSC1/CTNNB1	18
GO:0043524	negative regulation of neuron apoptotic process	21/995	162/18888	0.12963	2.46075	4.40313	0.000124217	0.00321779	0.00272417	GRIK2/MDK/NRP1/NES/NEFL/UCP2/GPI/DLX1/RHOA/SET/MT3/ATF4/CLU/PPT1/CTNNB1/ISL1/NONO/PLA2G3/GRN/UNC5B/RETREG1	21
GO:0009162	deoxyribonucleoside monophosphate metabolic process	7/995	23/18888	0.304348	5.77741	5.40604	0.000128349	0.00330819	0.00280071	DPYD/DUT/TYMS/SHMT1/ADK/TK1/NT5M	7
GO:2000781	positive regulation of double-strand break repair	14/995	85/18888	0.164706	3.1266	4.63375	0.000132804	0.00340599	0.0028835	FUS/FOXM1/MORF4L1/PRKDC/MAD2L2/SMARCA2/SMARCE1/SPIRE1/SMARCC1/PBRM1/ACTL6A/BCL7B/RUVBL2/RAD51AP1	14
GO:0009259	ribonucleotide metabolic process	44/995	466/18888	0.0944206	1.79238	4.08421	0.000134056	0.00342107	0.00289627	ENO2/PKM/UCP2/ELOVL6/DPYD/PID1/AASS/GPI/NDUFS6/NDUFA1/PGAM1/PRKACA/APP/HINT1/NDUFB8/MVD/ADK/ATP5MC3/GNAI3/CROT/HKDC1/SLC25A13/TSPO/ALDOC/PPT1/DLG1/NDUFS8/DLG2/OGT/NUDT5/SLC4A4/ATP5IF1/ENO4/NDUFC2/PANK3/ELOVL1/RNASEH2B/VCP/CMPK1/DLST/MCCC2/AK5/GTPBP1/ACOT7	44
GO:0009144	purine nucleoside triphosphate metabolic process	28/995	250/18888	0.112	2.12609	4.22662	0.00014019	0.00356	0.00301389	ENO2/PKM/UCP2/PID1/GPI/NDUFS6/NDUFA1/PGAM1/PRKACA/APP/NDUFB8/ADK/ATP5MC3/GNAI3/HKDC1/SLC25A13/TSPO/ALDOC/NDUFS8/OGT/NUDT5/SLC4A4/ATP5IF1/ENO4/NDUFC2/VCP/AK5/GTPBP1	28
GO:0009176	pyrimidine deoxyribonucleoside monophosphate metabolic process	5/995	11/18888	0.454545	8.6286	5.96796	0.000142121	0.00359134	0.00304042	DPYD/DUT/TYMS/SHMT1/NT5M	5
GO:0021954	central nervous system neuron development	14/995	86/18888	0.162791	3.09024	4.58137	0.000151059	0.00379742	0.00321489	NRP1/SOX1/DCLK2/LHX8/UBB/DCC/SLIT2/GBA2/ZMIZ1/FEZF2/ARHGAP35/NIN/EPHB1/NFIB	14
GO:0032373	positive regulation of sterol transport	9/995	39/18888	0.230769	4.38067	4.98359	0.000152486	0.00379742	0.00321489	ANXA2/ABCG1/ABCA1/LIPG/RXRA/SCP2/PTCH1/EEPD1/APOE	9
GO:0032376	positive regulation of cholesterol transport	9/995	39/18888	0.230769	4.38067	4.98359	0.000152486	0.00379742	0.00321489	ANXA2/ABCG1/ABCA1/LIPG/RXRA/SCP2/PTCH1/EEPD1/APOE	9
GO:0051782	negative regulation of cell division	6/995	17/18888	0.352941	6.69985	5.54424	0.000157698	0.00390834	0.00330879	AURKB/E2F8/ASPM/E2F7/BLM/PTCH1	6
GO:0007611	learning or memory	30/995	278/18888	0.107914	2.04852	4.15313	0.000160595	0.00396109	0.00335345	MDK/SYT4/RELN/LHX8/NRXN1/EGFR/B2M/EIF4EBP2/GPI/DNAH11/SORCS3/APP/SCN2A/SLC6A1/COMT/PLK2/S100B/NTAN1/VDAC1/CHRNA7/PPT1/GRIN2B/KIT/TSC1/FEN1/AFF2/CRH/PAK6/EIF4A3/APOE	30
GO:0032370	positive regulation of lipid transport	14/995	87/18888	0.16092	3.05472	4.52974	0.000171443	0.00420852	0.00356292	ANXA2/ABCG1/ABCA1/MIF/C1QTNF1/LIPG/RXRA/BMP6/SCP2/PTCH1/EEPD1/CRH/PLA2G3/APOE	14
GO:0021953	central nervous system neuron differentiation	22/995	178/18888	0.123596	2.3462	4.25535	0.000175094	0.00427776	0.00362154	ID4/NRP1/SOX1/DCLK2/LHX8/B2M/UBB/DCC/DLX1/DLX2/NKX2-1/SLIT2/FOXN4/GBA2/ZMIZ1/FEZF2/ARHGAP35/NIN/EPHB1/ISL1/NFIB/PTCH1	22
GO:0007127	meiosis I	18/995	131/18888	0.137405	2.60834	4.35595	0.000177144	0.00430743	0.00364666	TOP2A/ZWINT/CCNB2/PTTG1/CDC25B/NDC80/UBB/ESPL1/CCNE2/CKS2/KNL1/RAD54L/RAD51/RAD51C/TRIP13/RAD51AP1/CCNE1/RMI1	18
GO:0010975	regulation of neuron projection development	43/995	460/18888	0.0934783	1.77449	3.96558	0.000198222	0.00479253	0.00405735	DPYSL3/GPC2/ENC1/MDK/NRP1/SHTN1/NEFL/PTPRS/RELN/CFL1/POU3F2/ISLR2/COBL/ROBO1/SLIT1/MAP6/B2M/DCC/CXCL12/NTN1/SEMA5A/RHOA/MT3/SLIT2/SDC2/EZH2/NTNG2/FEZF2/PLXNA2/ABI2/ARHGAP35/DBN1/AKT1/NIN/SEMA3C/BRSK2/RGS2/CHODL/CERS2/WASHC5/PLA2G3/GRN/APOE	43
GO:0051347	positive regulation of transferase activity	37/995	376/18888	0.0984043	1.868	4.00902	0.000198953	0.00479253	0.00405735	HNRNPA2B1/PSRC1/UBE2C/RELN/EGFR/UBE2I/TRIB3/HNRNPD/ROBO1/AURKB/CENPE/RHOA/CDC20/PCNA/MT3/CSF1/EZH2/SERINC5/NEK2/RFC2/ECT2/TAOK2/CHRNA7/DVL2/AKT1/TOM1L1/PPIA/CHTF18/KIT/CALM1/EGF/CLSPN/RFC4/MAPK15/TCP1/IQGAP1/APOE	37
GO:0050772	positive regulation of axonogenesis	13/995	78/18888	0.166667	3.16382	4.5157	0.00020225	0.0048493	0.00410541	NRP1/SHTN1/NEFL/ISLR2/ROBO1/MAP6/CXCL12/NTN1/SEMA5A/SLIT2/PLXNA2/NIN/CHODL	13
GO:0060560	developmental growth involved in morphogenesis	27/995	243/18888	0.111111	2.10921	4.10382	0.000208604	0.00497849	0.00421477	NRP1/SHTN1/PTPRS/SYT4/AUTS2/ISLR2/COBL/SLIT1/DCC/CXCL12/NTN1/SEMA5A/MT3/APP/TNC/SLIT2/CXCR4/CSF1/S100B/NIN/SEMA3C/TTL/CTNNB1/FLRT3/IQGAP1/PAK6/APOE	27
GO:0032006	regulation of TOR signaling	19/995	145/18888	0.131034	2.48742	4.23983	0.000222631	0.00526814	0.00446	RELN/GPR137C/SESN3/RBX1/PRKACA/SH3BP4/ZMPSTE24/CASTOR2/AKT1/DEPDC5/OGT/TSC1/TNFAIP8L1/HDAC3/FAM83D/RFFL/F3/LAMTOR1/RNF152	19
GO:0009205	purine ribonucleoside triphosphate metabolic process	27/995	244/18888	0.110656	2.10057	4.08032	0.000223085	0.00526814	0.00446	ENO2/PKM/UCP2/PID1/GPI/NDUFS6/NDUFA1/PGAM1/PRKACA/APP/NDUFB8/ATP5MC3/GNAI3/HKDC1/SLC25A13/TSPO/ALDOC/NDUFS8/OGT/NUDT5/SLC4A4/ATP5IF1/ENO4/NDUFC2/VCP/AK5/GTPBP1	27
GO:0007062	sister chromatid cohesion	11/995	59/18888	0.186441	3.53919	4.60637	0.000223807	0.00526814	0.00446	ESPL1/BUB1/KIF22/CDC20/ESCO2/RB1/BUB1B/RAD51C/CTNNB1/FEN1/CDCA5	11
GO:0048511	rhythmic process	31/995	297/18888	0.104377	1.98138	4.01991	0.000229211	0.00537082	0.00454693	TOP2A/ID4/MDK/ZFHX3/PTGDS/CDK1/EGFR/RPE65/HNRNPD/DHX9/SFPQ/PPP1CA/PRKDC/TYMS/PCNA/NKX2-1/SCN9A/SLIT2/ATF4/TP53/EZH2/OGT/CBX3/PTX3/PSPC1/AMH/HDAC3/TEF/CRH/NONO/RAI1	31
GO:0031570	DNA integrity checkpoint signaling	18/995	134/18888	0.134328	2.54994	4.24593	0.000236251	0.00551074	0.00466538	CDK1/E2F1/PRKDC/RFWD3/TP53/WDR76/RAD51/E2F7/CHEK2/PLK2/TAOK2/CLSPN/CDT1/CHEK1/RNASEH2B/BLM/CDC45/RPA2	18
GO:0046034	ATP metabolic process	25/995	220/18888	0.113636	2.15715	4.07102	0.000249752	0.00579943	0.00490978	ENO2/PKM/UCP2/PID1/GPI/NDUFS6/NDUFA1/PGAM1/PRKACA/APP/NDUFB8/ATP5MC3/HKDC1/SLC25A13/TSPO/ALDOC/NDUFS8/OGT/NUDT5/SLC4A4/ATP5IF1/ENO4/NDUFC2/VCP/AK5	25
GO:0014013	regulation of gliogenesis	16/995	112/18888	0.142857	2.71184	4.28473	0.000253756	0.00586269	0.00496334	ID4/MDK/EGFR/DLX1/DLX2/NTN1/NKX6-2/CXCR4/TP53/EZH2/RB1/TSPO/CTNNB1/TMEM98/RNF10/CERS2	16
GO:0050769	positive regulation of neurogenesis	27/995	246/18888	0.109756	2.08349	4.03365	0.000254751	0.00586269	0.00496334	ID4/MDK/NRP1/SHTN1/NEFL/RELN/EGFR/ISLR2/ROBO1/MAP6/FZD3/HAP1/CXCL12/NTN1/SEMA5A/NKX6-2/SLIT2/ASPM/CXCR4/VCAN/PLXNA2/TSPO/DBN1/NIN/KIT/CTNNB1/CHODL	27
GO:0045664	regulation of neuron differentiation	23/995	196/18888	0.117347	2.22759	4.07384	0.000272908	0.00625263	0.00529346	ID4/ZFHX3/RELN/B2M/DLX1/DLX2/PCP4/CXCL12/DLL1/RHOA/PTBP1/APP/SIX3/ASPM/FEZF2/CDK5RAP2/S100B/ECT2/DDX6/BMP6/ZHX2/ISL1/NOTCH3	23
GO:0060236	regulation of mitotic spindle organization	9/995	42/18888	0.214286	4.06777	4.69341	0.000278348	0.00634905	0.00537509	PSRC1/GPSM2/TACC3/DCTN1/FSD1/CHMP3/TPR/NUMA1/CHMP1A	9
GO:2000177	regulation of neural precursor cell proliferation	15/995	102/18888	0.147059	2.79161	4.27835	0.000284139	0.00645258	0.00546274	ID4/VAX1/MDK/NES/FZD3/RHOA/SHCBP1/SIX3/ASPM/TP53/VCAN/FOXO1/CTNNA1/CTNNB1/EGF	15
GO:0010720	positive regulation of cell development	42/995	454/18888	0.092511	1.75613	3.84561	0.000291735	0.00659602	0.00558417	ID4/MDK/NRP1/SHTN1/NEFL/RELN/EGFR/ISLR2/ROBO1/MAP6/FZD3/HAP1/CXCL12/PRKDC/NTN1/SEMA5A/NOTCH2/RHOA/CD46/NKX6-2/SLIT2/ASPM/CXCR4/CSF1/VCAN/SMARCA2/RB1/CTNNBIP1/ZMIZ1/PLXNA2/SMARCE1/TSPO/PPP2R3C/DBN1/NIN/SMARCC1/PBRM1/ACTL6A/KIT/CTNNB1/CHODL/PLA2G3	42
GO:2000278	regulation of DNA biosynthetic process	16/995	115/18888	0.13913	2.6411	4.16264	0.000344708	0.00775969	0.00656933	HNRNPA2B1/HNRNPD/CCNA2/AURKB/PIF1/PCNA/TEN1/TP53/NEK2/RFC2/CHTF18/CTNNB1/RFC4/CHEK1/MAPK15/TCP1	16
GO:0044282	small molecule catabolic process	36/995	373/18888	0.0965147	1.83213	3.82768	0.000349884	0.00784197	0.00663899	ENO2/ETFB/PKM/ARHGAP11B/ACAT2/DPYD/AASS/GAD1/DCXR/MTLN/RENBP/GLUL/PGAM1/CRYM/ECHDC2/GPT2/TP53/PLIN5/SHMT1/FAH/CROT/GATD1/GNPDA1/HADHA/NAGK/AMDHD2/ALDH8A1/AKT1/NUDT5/LPIN3/SCP2/ECHS1/DLST/DECR1/MCCC2/ACOT7	36
GO:0009199	ribonucleoside triphosphate metabolic process	27/995	251/18888	0.10757	2.04199	3.91889	0.000351977	0.00785472	0.00664979	ENO2/PKM/UCP2/PID1/GPI/NDUFS6/NDUFA1/PGAM1/PRKACA/APP/NDUFB8/ATP5MC3/GNAI3/HKDC1/SLC25A13/TSPO/ALDOC/NDUFS8/OGT/NUDT5/SLC4A4/ATP5IF1/ENO4/NDUFC2/VCP/AK5/GTPBP1	27
GO:0007144	female meiosis I	5/995	13/18888	0.384615	7.30112	5.35917	0.000362348	0.0080513	0.00681621	CCNB2/CDC25B/NDC80/UBB/TRIP13	5
GO:0007098	centrosome cycle	18/995	139/18888	0.129496	2.45822	4.06905	0.000373255	0.00825806	0.00699125	CDK1/NDC80/DCTN1/CHMP3/CHD3/CCNL2/GEN1/PCLAF/CKAP5/CNTROB/CDK5RAP2/NEK2/PLK2/NIN/CTNNB1/CHMP1A/CHEK1/CEP152	18
GO:0007163	establishment or maintenance of cell polarity	25/995	226/18888	0.110619	2.09988	3.92258	0.000376987	0.00830499	0.00703099	SHTN1/GPSM2/NDC80/DCTN1/CLIC4/RHOA/MAP4/GJA1/CENPA/SAPCD2/CKAP5/LMNA/ARHGAP35/CDK5RAP2/CTNNA1/DLG1/MAD2L1/DLG2/BRSK2/NUMA1/EPHB1/HDAC3/DYNLT1/FOXJ1/DLG5	25
GO:0042770	signal transduction in response to DNA damage	22/995	188/18888	0.117021	2.2214	3.96889	0.000381712	0.0083733	0.00708881	CDK1/MIF/FOXM1/E2F1/PRKDC/RFWD3/MAD2L2/TP53/NDRG1/WDR76/RAD51/E2F7/ZMPSTE24/CHEK2/PLK2/TAOK2/COPS3/CLSPN/CHEK1/RNASEH2B/BLM/RPA2	22
GO:0048880	sensory system development	38/995	403/18888	0.0942928	1.78995	3.78003	0.000384739	0.00840395	0.00711476	VAX1/NRP1/FZD5/NES/SOX1/EGFR/RPE65/DLX1/MFAP2/GNB1/DLX2/CLIC4/PLAAT3/DLL1/MAF/NOTCH2/SMOC1/PROM1/GJA1/SIX3/FREM2/ATF4/FOXN4/SLITRK6/ABI2/ARHGAP35/CDKN1C/DLG1/DIO3/ACTL6A/CPAMD8/CTNNB1/EPHB1/BMP6/ZHX2/ISL1/NFIB/TTLL5	38
GO:0009150	purine ribonucleotide metabolic process	41/995	446/18888	0.0919283	1.74507	3.755	0.000390097	0.00848503	0.00718341	ENO2/PKM/UCP2/ELOVL6/PID1/AASS/GPI/NDUFS6/NDUFA1/PGAM1/PRKACA/APP/HINT1/NDUFB8/MVD/ADK/ATP5MC3/GNAI3/CROT/HKDC1/SLC25A13/TSPO/ALDOC/PPT1/DLG1/NDUFS8/DLG2/OGT/NUDT5/SLC4A4/ATP5IF1/ENO4/NDUFC2/PANK3/ELOVL1/VCP/DLST/MCCC2/AK5/GTPBP1/ACOT7	41
GO:0065004	protein-DNA complex assembly	26/995	240/18888	0.108333	2.05648	3.88421	0.000402577	0.00871967	0.00738205	HMGB2/RNF4/HAT1/CENPF/CENPE/CENPK/SET/DLGAP5/ASF1B/CENPA/CHAF1A/TP53/RB1/RAD51/MCM2/SUPT16H/CENPH/RAD51C/ITGB3BP/CHAF1B/CENPO/CDT1/CENPI/CHRAC1/CDC45/MED24	26
GO:0031023	microtubule organizing center organization	19/995	152/18888	0.125	2.37286	4.0074	0.000409118	0.00882428	0.00747061	CDK1/NDC80/DCTN1/CHMP3/CHD3/CCNL2/GEN1/PCLAF/CKAP5/CNTROB/CDK5RAP2/NEK2/PLK2/NIN/CTNNB1/CHMP1A/CHEK1/CEP152/FOXJ1	19
GO:0071900	regulation of protein serine/threonine kinase activity	28/995	267/18888	0.104869	1.99072	3.84464	0.000418006	0.00897842	0.00760111	UCHL1/PSRC1/CCNI/CCNB2/EGFR/CCNB1/TRIB3/ROBO1/CCNA2/CCNE2/CDKN2C/CDKN3/RHOA/CCNG2/CDC25C/EZH2/RB1/TSG101/CDKN1C/DVL2/AKT1/KIT/CALM1/RGS2/EGF/BLM/CCNE1/APOE	28
GO:1990138	neuron projection extension	21/995	177/18888	0.118644	2.25221	3.947	0.000426334	0.00911931	0.00772038	NRP1/SHTN1/PTPRS/SYT4/AUTS2/ISLR2/SLIT1/CXCL12/NTN1/SEMA5A/MT3/SLIT2/CXCR4/S100B/SEMA3C/TTL/CTNNB1/FLRT3/IQGAP1/PAK6/APOE	21
GO:0045739	positive regulation of DNA repair	17/995	129/18888	0.131783	2.50162	4.03555	0.000437163	0.00926418	0.00784303	FUS/EGFR/DHX9/FOXM1/MORF4L1/PRKDC/PCNA/MAD2L2/SMARCA2/SMARCE1/SPIRE1/SMARCC1/PBRM1/ACTL6A/BCL7B/RUVBL2/RAD51AP1	17
GO:0031929	TOR signaling	20/995	165/18888	0.121212	2.30096	3.95794	0.000437933	0.00926418	0.00784303	RELN/EIF4EBP2/GPR137C/SESN3/RBX1/PRKACA/SH3BP4/ZMPSTE24/CASTOR2/AKT1/DEPDC5/OGT/TSC1/TNFAIP8L1/HDAC3/FAM83D/RFFL/F3/LAMTOR1/RNF152	20
GO:0033555	multicellular organismal response to stress	14/995	95/18888	0.147368	2.79748	4.14171	0.000438498	0.00926418	0.00784303	GRIK2/TAC1/MDK/RELN/SCN9A/LYPD1/COMT/VDAC1/TSPO/AKT1/ATAT1/SCN3A/CRH/APOE	14
GO:0048265	response to pain	8/995	36/18888	0.222222	4.21843	4.55793	0.000466215	0.00980954	0.00830473	TAC1/RELN/SCN9A/TSPO/AKT1/ATAT1/SCN3A/CRH	8
GO:0001654	eye development	37/995	393/18888	0.0941476	1.7872	3.7188	0.00046994	0.00984773	0.00833707	VAX1/NRP1/FZD5/NES/SOX1/EGFR/RPE65/DLX1/MFAP2/GNB1/DLX2/CLIC4/PLAAT3/DLL1/MAF/NOTCH2/SMOC1/PROM1/GJA1/SIX3/FREM2/ATF4/FOXN4/SLITRK6/ABI2/ARHGAP35/CDKN1C/DLG1/DIO3/ACTL6A/CPAMD8/CTNNB1/EPHB1/BMP6/ZHX2/NFIB/TTLL5	37
GO:0030261	chromosome condensation	9/995	45/18888	0.2	3.79658	4.42905	0.00048004	0.0100186	0.00848176	TOP2A/NUSAP1/CDK1/SMC2/SMC4/NCAPH/NCAPD2/CHMP1A/CDCA5	9
GO:0042552	myelination	19/995	154/18888	0.123377	2.34205	3.94334	0.000482676	0.010033	0.00849396	ID4/CD9/POU3F2/GPC1/NKX6-2/CXCR4/SCN2A/NDRG1/SERINC5/GNPAT/CLU/DLG1/AKT1/TSC1/ANK2/CTNNB1/TMEM98/RNF10/TSPAN2	19
GO:0021854	hypothalamus development	7/995	28/18888	0.25	4.74573	4.67731	0.000492027	0.0101864	0.00862374	NRP1/POU3F2/UBB/HAP1/NKX2-1/CTNNB1/CRH	7
GO:0043523	regulation of neuron apoptotic process	26/995	244/18888	0.106557	2.02277	3.79188	0.000518755	0.0106858	0.00904655	GRIK2/MDK/NRP1/NES/NEFL/UCP2/MYBL2/UBB/NQO1/GPI/DLX1/RHOA/SET/MT3/ATF4/TP53/G6PD/CLU/PPT1/CTNNB1/ISL1/NONO/PLA2G3/GRN/UNC5B/RETREG1	26
GO:0007623	circadian rhythm	23/995	205/18888	0.112195	2.12979	3.83533	0.000520297	0.0106858	0.00904655	TOP2A/ID4/ZFHX3/PTGDS/CDK1/EGFR/RPE65/HNRNPD/SFPQ/PPP1CA/PRKDC/TYMS/NKX2-1/SCN9A/ATF4/TP53/EZH2/OGT/PSPC1/HDAC3/CRH/NONO/RAI1	23
GO:0051028	mRNA transport	17/995	131/18888	0.129771	2.46343	3.96349	0.000523757	0.0107142	0.00907058	PEG10/HNRNPA2B1/DHX9/RBM8A/G3BP2/SRSF3/RBM15B/KHSRP/TPR/NUP42/SMG1/DDX39B/KIF5C/ALYREF/SLBP/EIF4A3/NCBP3	17
GO:0034329	cell junction assembly	41/995	453/18888	0.0905077	1.7181	3.64808	0.000534412	0.0108889	0.00921852	GAP43/NRP1/FZD5/CD9/PTPRS/GABRB2/FLRT2/NRXN1/SLITRK2/SLIT1/GJC1/NTN1/RHOA/PRKACA/GJA1/APP/ZNF703/TBCD/GABRA1/LGI2/SLITRK6/NTNG2/GNPAT/RHOC/ECT2/RCC2/TAOK2/CTNNA1/TRIP6/DLG1/DNER/OGT/GABRG2/CORO2B/TSC1/ANK2/CTNNB1/EPHB1/ACTN1/FLRT3/DLG5	41
GO:0045842	positive regulation of mitotic metaphase/anaphase transition	5/995	14/18888	0.357143	6.77961	5.10132	0.000539283	0.0109437	0.00926491	UBE2C/ESPL1/CDC20/DLGAP5/RB1	5
GO:0048678	response to axon injury	13/995	86/18888	0.151163	2.86951	4.09757	0.000541347	0.0109437	0.00926491	GAP43/DPYSL3/DHFR/NEFL/PTPRS/CDK1/TNC/PCSK1/CTNNA1/TSPO/CERS2/FLRT3/GRN	13
GO:0007265	Ras protein signal transduction	16/995	120/18888	0.133333	2.53106	3.96756	0.000558908	0.0112009	0.00948268	SHTN1/CCNA2/SQSTM1/G3BP2/FOXM1/GNB1/NTN1/NOTCH2/TP53/CSF1/RB1/RASGEF1B/PLK2/DHCR24/RIT1/RABL3	16
GO:0007272	ensheathment of neurons	19/995	156/18888	0.121795	2.31202	3.88028	0.000567421	0.0112009	0.00948268	ID4/CD9/POU3F2/GPC1/NKX6-2/CXCR4/SCN2A/NDRG1/SERINC5/GNPAT/CLU/DLG1/AKT1/TSC1/ANK2/CTNNB1/TMEM98/RNF10/TSPAN2	19
GO:0008366	axon ensheathment	19/995	156/18888	0.121795	2.31202	3.88028	0.000567421	0.0112009	0.00948268	ID4/CD9/POU3F2/GPC1/NKX6-2/CXCR4/SCN2A/NDRG1/SERINC5/GNPAT/CLU/DLG1/AKT1/TSC1/ANK2/CTNNB1/TMEM98/RNF10/TSPAN2	19
GO:0001736	establishment of planar polarity	8/995	37/18888	0.216216	4.10441	4.45723	0.000567674	0.0112009	0.00948268	FZD3/SAPCD2/FZD6/EXOC5/DVL2/BRSK2/CELSR1/FUZ	8
GO:0007164	establishment of tissue polarity	8/995	37/18888	0.216216	4.10441	4.45723	0.000567674	0.0112009	0.00948268	FZD3/SAPCD2/FZD6/EXOC5/DVL2/BRSK2/CELSR1/FUZ	8
GO:0150063	visual system development	37/995	397/18888	0.093199	1.76919	3.65258	0.000568868	0.0112009	0.00948268	VAX1/NRP1/FZD5/NES/SOX1/EGFR/RPE65/DLX1/MFAP2/GNB1/DLX2/CLIC4/PLAAT3/DLL1/MAF/NOTCH2/SMOC1/PROM1/GJA1/SIX3/FREM2/ATF4/FOXN4/SLITRK6/ABI2/ARHGAP35/CDKN1C/DLG1/DIO3/ACTL6A/CPAMD8/CTNNB1/EPHB1/BMP6/ZHX2/NFIB/TTLL5	37
GO:0048713	regulation of oligodendrocyte differentiation	9/995	46/18888	0.195652	3.71405	4.34595	0.000569281	0.0112009	0.00948268	ID4/MDK/SOX1/DLX1/DLX2/NKX6-2/CXCR4/CTNNB1/TMEM98	9
GO:0009129	pyrimidine nucleoside monophosphate metabolic process	6/995	21/18888	0.285714	5.42369	4.78293	0.000576723	0.0113042	0.00957011	DPYD/DUT/TYMS/SHMT1/CMPK1/NT5M	6
GO:0045859	regulation of protein kinase activity	42/995	470/18888	0.0893617	1.69635	3.60499	0.000595714	0.0116322	0.00984781	UCHL1/PTPRT/PSRC1/CCNI/RELN/CCNB2/EGFR/CCNB1/TRIB3/DBNDD1/ROBO1/CCNA2/CCNE2/CENPE/CDKN2C/CDKN3/RHOA/MT3/APP/CCNG2/CDC25C/CSF1/EZH2/RB1/TSG101/ECT2/TAOK2/CDKN1C/DVL2/AKT1/TOM1L1/PPIA/KIT/CALM1/RGS2/EGF/CLSPN/ADAR/BLM/IQGAP1/CCNE1/APOE	42
GO:0021510	spinal cord development	14/995	98/18888	0.142857	2.71184	4.0065	0.000604791	0.0117649	0.00996014	SOX1/NEFL/PTPRS/RELN/ZIC1/SLIT1/DCC/DCTN1/DLL1/EED/FOXN4/ACTL6A/ISL1/PTCH1	14
GO:0072524	pyridine-containing compound metabolic process	20/995	170/18888	0.117647	2.23328	3.80899	0.000644282	0.012456	0.0105453	ENO2/PNPO/PKM/UCP2/NQO1/DCXR/GPI/PGAM1/PRKACA/APP/TP53/G6PD/NMNAT3/HKDC1/ALDOC/ME1/OGT/SLC4A4/ENO4/VCP	20
GO:0009135	purine nucleoside diphosphate metabolic process	15/995	110/18888	0.136364	2.58858	3.94032	0.000647569	0.012456	0.0105453	ENO2/PKM/UCP2/GPI/PGAM1/PRKACA/APP/HKDC1/ALDOC/DLG1/DLG2/OGT/SLC4A4/ENO4/AK5	15
GO:0009179	purine ribonucleoside diphosphate metabolic process	15/995	110/18888	0.136364	2.58858	3.94032	0.000647569	0.012456	0.0105453	ENO2/PKM/UCP2/GPI/PGAM1/PRKACA/APP/HKDC1/ALDOC/DLG1/DLG2/OGT/SLC4A4/ENO4/AK5	15
GO:0050919	negative chemotaxis	9/995	47/18888	0.191489	3.63503	4.26514	0.000671657	0.0128714	0.0108969	FLRT2/ROBO1/SLIT1/NTN1/SEMA5A/RHOA/SLIT2/SEMA3C/FLRT3	9
GO:0010038	response to metal ion	34/995	360/18888	0.0944444	1.79283	3.58153	0.000741012	0.0141478	0.0119775	HMOX1/ADGRV1/SYT4/UCP2/CDK1/EGFR/HNRNPD/B2M/NQO1/GPI/PPP1CA/CLIC4/PCNA/MT3/PAM/ATF4/SLC6A1/NDRG1/G6PD/CHUK/PCSK1/TFRC/ECT2/SLC25A13/CAT/TSPO/D2HGDH/AKT1/DLG2/KIT/CALM1/S100A16/BMP6/IQGAP1	34
GO:0031571	mitotic G1 DNA damage checkpoint signaling	7/995	30/18888	0.233333	4.42935	4.43277	0.000771528	0.0145619	0.0123281	PRKDC/RFWD3/TP53/E2F7/CHEK2/PLK2/RPA2	7
GO:0044819	mitotic G1/S transition checkpoint signaling	7/995	30/18888	0.233333	4.42935	4.43277	0.000771528	0.0145619	0.0123281	PRKDC/RFWD3/TP53/E2F7/CHEK2/PLK2/RPA2	7
GO:0043254	regulation of protein-containing complex assembly	38/995	418/18888	0.0909091	1.72572	3.53814	0.000773327	0.0145619	0.0123281	TMSB4Y/TMSB10/TMSB15A/LGALS3/PSRC1/ABCA1/RNF4/PFN1/ELN/DUT/DCTN1/MTLN/CLIP3/RHOA/DNAJC15/TRIOBP/SLIT2/TP53/CKAP5/TBCD/GBA2/RB1/CTNNBIP1/UBLCP1/RHOC/CDK5RAP2/CLU/TFRC/TPPP3/DLG1/NUMA1/MAPK15/ATAT1/VCP/ISL1/CAPG/PRRT2/APOE	38
GO:0030174	regulation of DNA-templated DNA replication initiation	5/995	15/18888	0.333333	6.32764	4.86756	0.000773999	0.0145619	0.0123281	MCM3/MCM4/MCM2/CDT1/MCM7	5
GO:1905954	positive regulation of lipid localization	15/995	112/18888	0.133929	2.54235	3.8605	0.000784079	0.0146979	0.0124432	ANXA2/ABCG1/ABCA1/MIF/C1QTNF1/LIPG/PLIN5/RXRA/BMP6/SCP2/PTCH1/EEPD1/CRH/PLA2G3/APOE	15
GO:0021795	cerebral cortex cell migration	9/995	48/18888	0.1875	3.5593	4.18651	0.000788577	0.0147287	0.0124693	RELN/EGFR/POU3F2/ROBO1/RHOA/NKX2-1/SLIT2/ZMIZ1/CTNNB1	9
GO:0051302	regulation of cell division	21/995	186/18888	0.112903	2.14323	3.69486	0.00082241	0.0152501	0.0129107	MDK/FGF3/PRC1/CDC25B/CIT/AURKB/FSD1/CHMP3/DLL1/RHOA/BIRC5/E2F8/ASPM/E2F7/ECT2/VEGFB/PRPF40A/CAT/CALM1/BLM/PTCH1	21
GO:0098727	maintenance of cell number	21/995	186/18888	0.112903	2.14323	3.69486	0.00082241	0.0152501	0.0129107	ZIC1/DLL1/GNL3/ELAVL1/LDB2/ASPM/EZH2/SMARCA2/SMARCE1/FOXO1/SMARCC1/DDX6/OGT/ACTL6A/KIT/CTNNB1/BCL7B/FANCC/ZHX2/NFIB/ZIC3	21
GO:0050657	nucleic acid transport	19/995	161/18888	0.118012	2.24022	3.72674	0.000837512	0.0154192	0.0130538	PEG10/HNRNPA2B1/RFTN1/DHX9/RBM8A/G3BP2/SRSF3/RBM15B/CKAP5/KHSRP/TPR/NUP42/SMG1/DDX39B/KIF5C/ALYREF/SLBP/EIF4A3/NCBP3	19
GO:0050658	RNA transport	19/995	161/18888	0.118012	2.24022	3.72674	0.000837512	0.0154192	0.0130538	PEG10/HNRNPA2B1/RFTN1/DHX9/RBM8A/G3BP2/SRSF3/RBM15B/CKAP5/KHSRP/TPR/NUP42/SMG1/DDX39B/KIF5C/ALYREF/SLBP/EIF4A3/NCBP3	19
GO:0048145	regulation of fibroblast proliferation	13/995	90/18888	0.144444	2.74198	3.90624	0.000842064	0.0154478	0.0130781	CDK6/EGFR/CCNB1/DHX9/CCNA2/MIF/E2F1/TP53/ZMIZ1/ZMPSTE24/CTNNB1/FTH1/RNASEH2B	13
GO:0000077	DNA damage checkpoint signaling	16/995	125/18888	0.128	2.42981	3.78211	0.000878154	0.0160528	0.0135902	CDK1/E2F1/PRKDC/RFWD3/TP53/WDR76/RAD51/E2F7/CHEK2/PLK2/TAOK2/CLSPN/CHEK1/RNASEH2B/BLM/RPA2	16
GO:0006403	RNA localization	22/995	200/18888	0.11	2.08812	3.64806	0.000888017	0.0161188	0.0136461	PEG10/HNRNPA2B1/RFTN1/DHX9/RBM8A/G3BP2/SRSF3/RBM15B/CKAP5/KHSRP/TPR/NUP42/SMG1/FUBP3/DDX39B/RUVBL2/KIF5C/TCP1/ALYREF/SLBP/EIF4A3/NCBP3	22
GO:0031099	regeneration	22/995	200/18888	0.11	2.08812	3.64806	0.000888017	0.0161188	0.0136461	GAP43/MDK/DHFR/NEFL/CD9/PTPRS/UCP2/CDK1/EGFR/CCNA2/CXCL12/TYMS/PCNA/GJA1/TNC/EZH2/CTNNA1/TSPO/NFIB/CERS2/PTCH1/GRN	22
GO:0031297	replication fork processing	9/995	49/18888	0.183673	3.48666	4.10995	0.000921538	0.0166685	0.0141115	NUCKS1/MMS22L/PCNA/GEN1/RFWD3/TRAIP/RAD51/FAM111A/BLM	9
GO:0042752	regulation of circadian rhythm	15/995	114/18888	0.131579	2.49775	3.78238	0.000944246	0.0170195	0.0144087	TOP2A/ZFHX3/PTGDS/CDK1/HNRNPD/SFPQ/PPP1CA/PRKDC/NKX2-1/TP53/EZH2/PSPC1/HDAC3/CRH/NONO	15
GO:0060070	canonical Wnt signaling pathway	31/995	323/18888	0.0959752	1.82189	3.51333	0.000957409	0.0171967	0.0145587	MDK/FZD5/EGFR/LIMD1/FZD3/ANKRD6/PPP1CA/DLX5/SEMA5A/RBX1/MAD2L2/ZNF703/ASPM/FZD6/IGFBP2/CTNNBIP1/FZD8/FOXO1/DVL2/CTNNB1/EGF/CCDC88C/RUVBL2/CSNK1G2/VCP/ISL1/TLE4/RNF14/APC2/APOE/FUZ	31
GO:0060828	regulation of canonical Wnt signaling pathway	27/995	268/18888	0.100746	1.91246	3.54766	0.000969992	0.0173622	0.0146988	MDK/EGFR/LIMD1/ANKRD6/PPP1CA/DLX5/SEMA5A/RBX1/MAD2L2/ZNF703/ASPM/FZD6/IGFBP2/CTNNBIP1/FOXO1/CTNNB1/EGF/CCDC88C/RUVBL2/CSNK1G2/VCP/ISL1/TLE4/RNF14/APC2/APOE/FUZ	27
GO:0021542	dentate gyrus development	6/995	23/18888	0.26087	4.95206	4.47209	0.000980127	0.0174152	0.0147437	CDK6/MDK/EMX2/SCN2A/FEZF2/ATAT1	6
GO:0050961	detection of temperature stimulus involved in sensory perception	6/995	23/18888	0.26087	4.95206	4.47209	0.000980127	0.0174152	0.0147437	GRIK2/CXCL12/SCN9A/CXCR4/COMT/EPHB1	6
GO:0045023	G0 to G1 transition	8/995	40/18888	0.2	3.79658	4.17519	0.000983092	0.0174152	0.0147437	CDK3/SMARCA2/SMARCE1/SMARCC1/PBRM1/ACTL6A/BCL7B/CHEK1	8
GO:0019362	pyridine nucleotide metabolic process	19/995	164/18888	0.115854	2.19924	3.63731	0.00104751	0.0183671	0.0155495	ENO2/PKM/UCP2/NQO1/DCXR/GPI/PGAM1/PRKACA/APP/TP53/G6PD/NMNAT3/HKDC1/ALDOC/ME1/OGT/SLC4A4/ENO4/VCP	19
GO:0046496	nicotinamide nucleotide metabolic process	19/995	164/18888	0.115854	2.19924	3.63731	0.00104751	0.0183671	0.0155495	ENO2/PKM/UCP2/NQO1/DCXR/GPI/PGAM1/PRKACA/APP/TP53/G6PD/NMNAT3/HKDC1/ALDOC/ME1/OGT/SLC4A4/ENO4/VCP	19
GO:0051236	establishment of RNA localization	19/995	164/18888	0.115854	2.19924	3.63731	0.00104751	0.0183671	0.0155495	PEG10/HNRNPA2B1/RFTN1/DHX9/RBM8A/G3BP2/SRSF3/RBM15B/CKAP5/KHSRP/TPR/NUP42/SMG1/DDX39B/KIF5C/ALYREF/SLBP/EIF4A3/NCBP3	19
GO:0014009	glial cell proliferation	10/995	60/18888	0.166667	3.16382	3.95864	0.00107372	0.0186982	0.0158298	EGFR/NTN1/TP53/CSF1/RB1/CLU/TSPO/RNF10/NFIB/CERS2	10
GO:0046686	response to cadmium ion	10/995	60/18888	0.166667	3.16382	3.95864	0.00107372	0.0186982	0.0158298	HMOX1/CDK1/EGFR/GPI/PCNA/MT3/CHUK/CAT/AKT1/KIT	10
GO:0042772	DNA damage response, signal transduction resulting in transcription	5/995	16/18888	0.3125	5.93216	4.65414	0.00107728	0.0186982	0.0158298	FOXM1/MAD2L2/TP53/CHEK2/COPS3	5
GO:0032465	regulation of cytokinesis	13/995	93/18888	0.139785	2.65353	3.76949	0.00115029	0.0198984	0.0168459	PRC1/CDC25B/CIT/AURKB/FSD1/CHMP3/RHOA/BIRC5/E2F8/E2F7/ECT2/PRPF40A/CALM1	13
GO:0051642	centrosome localization	7/995	32/18888	0.21875	4.15251	4.2088	0.00116353	0.0199001	0.0168474	GPSM2/DLGAP5/ASPM/PLXNA2/DLG1/MAD2L1/NIN	7
GO:0061842	microtubule organizing center localization	7/995	32/18888	0.21875	4.15251	4.2088	0.00116353	0.0199001	0.0168474	GPSM2/DLGAP5/ASPM/PLXNA2/DLG1/MAD2L1/NIN	7
GO:0090169	regulation of spindle assembly	7/995	32/18888	0.21875	4.15251	4.2088	0.00116353	0.0199001	0.0168474	GPSM2/RNF4/CHMP3/TPR/NUMA1/CHMP1A/MAPK15	7
GO:0009394	2'-deoxyribonucleotide metabolic process	8/995	41/18888	0.195122	3.70398	4.0872	0.00116583	0.0199001	0.0168474	DPYD/RRM2/DUT/TYMS/SHMT1/ADK/NT5M/AK5	8
GO:0016032	viral process	38/995	428/18888	0.088785	1.6854	3.38221	0.00119569	0.0203425	0.0172219	TOP2A/NRP1/LGALS1/DEK/NUCKS1/CDK1/CFL1/LAMP1/EGFR/IFITM3/DHX9/PSMC3/CSNK2B/GALNT1/CHMP3/CD46/PTBP1/ILF3/CXCR4/TP53/TSG101/FAM111A/PPIE/LARP7/TFRC/HACD3/AKT1/DDX6/PPIA/PTX3/ADAR/CHMP1A/ST3GAL3/MGAT4C/DYNLT1/VCP/VPS37C/APOE	38
GO:0001738	morphogenesis of a polarized epithelium	10/995	61/18888	0.163934	3.11195	3.89592	0.00122471	0.0207677	0.0175818	FZD3/RHOA/SAPCD2/FZD6/EXOC5/DVL2/BRSK2/CELSR1/FUZ/DLG5	10
GO:0014012	peripheral nervous system axon regeneration	4/995	10/18888	0.4	7.59317	4.91776	0.00124463	0.0208992	0.0176932	NEFL/TNC/TSPO/CERS2	4
GO:0021892	cerebral cortex GABAergic interneuron differentiation	4/995	10/18888	0.4	7.59317	4.91776	0.00124463	0.0208992	0.0176932	DLX1/DLX2/NKX2-1/FEZF2	4
GO:0033313	meiotic cell cycle checkpoint signaling	4/995	10/18888	0.4	7.59317	4.91776	0.00124463	0.0208992	0.0176932	ZWINT/KNL1/TTK/TRIP13	4
GO:0051315	attachment of mitotic spindle microtubules to kinetochore	6/995	24/18888	0.25	4.74573	4.32989	0.00124917	0.0209073	0.0177001	NDC80/AURKB/CENPE/BIRC5/CDT1/SKA1	6
GO:0006289	nucleotide-excision repair	12/995	83/18888	0.144578	2.74452	3.75603	0.00130544	0.0216385	0.0183191	FAN1/TP53/SMARCA2/SMARCE1/RPA3/SMARCC1/PBRM1/ACTL6A/BCL7B/FANCC/RPA1/RPA2	12
GO:0032371	regulation of sterol transport	12/995	83/18888	0.144578	2.74452	3.75603	0.00130544	0.0216385	0.0183191	ANXA2/ABCG1/ABCA1/LIPG/TSPO/RXRA/EGF/SCP2/PTCH1/EEPD1/LAMTOR1/APOE	12
GO:0032374	regulation of cholesterol transport	12/995	83/18888	0.144578	2.74452	3.75603	0.00130544	0.0216385	0.0183191	ANXA2/ABCG1/ABCA1/LIPG/TSPO/RXRA/EGF/SCP2/PTCH1/EEPD1/LAMTOR1/APOE	12
GO:0032204	regulation of telomere maintenance	14/995	106/18888	0.132075	2.50718	3.66942	0.00132814	0.0219441	0.0185778	HNRNPA2B1/HNRNPD/AURKB/PIF1/TEN1/GNL3/TP53/NEK2/SMG1/ACTL6A/CTNNB1/RUVBL2/MAPK15/TCP1	14
GO:0006090	pyruvate metabolic process	15/995	118/18888	0.127119	2.41308	3.63101	0.00134846	0.0222087	0.0188018	ENO2/PKM/UCP2/GPI/PGAM1/PRKACA/APP/FAHD1/HKDC1/VDAC1/ALDOC/ME1/OGT/SLC4A4/ENO4	15
GO:0010721	negative regulation of cell development	28/995	288/18888	0.0972222	1.84556	3.40986	0.00135877	0.0223073	0.0188853	ID4/VAX1/CDK6/MDK/NRP1/DLL3/PTPRS/SYT4/SLIT1/B2M/DCC/DLX1/DLX2/NTN1/SEMA5A/MT3/NKX6-2/TP53/RB1/CTNNA1/TSPO/SEMA3C/CTNNB1/TMEM98/RNF10/DYNLT1/CERS2/FOXJ1	28
GO:0009262	deoxyribonucleotide metabolic process	8/995	42/18888	0.190476	3.61579	4.00193	0.00137465	0.022425	0.018985	DPYD/RRM2/DUT/TYMS/SHMT1/ADK/NT5M/AK5	8
GO:0019692	deoxyribose phosphate metabolic process	8/995	42/18888	0.190476	3.61579	4.00193	0.00137465	0.022425	0.018985	DPYD/RRM2/DUT/TYMS/SHMT1/ADK/NT5M/AK5	8
GO:0001889	liver development	17/995	143/18888	0.118881	2.25671	3.55723	0.00141717	0.0230457	0.0195104	MDK/UCP2/EGFR/COBL/HNRNPD/DUT/NOTCH2/E2F8/TYMS/CADM1/PCNA/ONECUT2/EZH2/E2F7/ZMPSTE24/PTCH1/ZIC3	17
GO:0044773	mitotic DNA damage checkpoint signaling	12/995	84/18888	0.142857	2.71184	3.70792	0.00145154	0.0233082	0.0197326	CDK1/PRKDC/RFWD3/TP53/E2F7/CHEK2/PLK2/TAOK2/CLSPN/CHEK1/BLM/RPA2	12
GO:0001558	regulation of cell growth	37/995	418/18888	0.0885167	1.68031	3.31673	0.00145358	0.0233082	0.0197326	NRP1/SHTN1/PSRC1/PTPRS/SYT4/EGFR/ISLR2/SLIT1/DCC/CDKN2C/CXCL12/NTN1/SEMA5A/MT3/GJA1/TNC/MAD2L2/SLIT2/SGK3/CXCR4/TP53/FOXP1/SMARCA2/G6PD/EXOSC2/RB1/TSG101/SH3BP4/TAOK2/PPT1/IGFBP7/AKT1/SEMA3C/TTL/RGS2/LAMTOR1/APOE	37
GO:0003159	morphogenesis of an endothelium	5/995	17/18888	0.294118	5.58321	4.45808	0.00146043	0.0233082	0.0197326	CSNK2B/RHOA/CXCR4/FOXP1/CTNNB1	5
GO:0032488	Cdc42 protein signal transduction	5/995	17/18888	0.294118	5.58321	4.45808	0.00146043	0.0233082	0.0197326	NRP1/SHTN1/ABCA1/NTN1/APOE	5
GO:0060253	negative regulation of glial cell proliferation	5/995	17/18888	0.294118	5.58321	4.45808	0.00146043	0.0233082	0.0197326	TP53/RB1/TSPO/RNF10/CERS2	5
GO:0061154	endothelial tube morphogenesis	5/995	17/18888	0.294118	5.58321	4.45808	0.00146043	0.0233082	0.0197326	CSNK2B/RHOA/CXCR4/FOXP1/CTNNB1	5
GO:0032368	regulation of lipid transport	18/995	156/18888	0.115385	2.19034	3.52039	0.00146837	0.023359	0.0197757	ANXA2/ABCG1/ABCA1/MIF/C1QTNF1/LIPG/TSPO/AKT1/RXRA/EGF/BMP6/SCP2/PTCH1/EEPD1/CRH/PLA2G3/LAMTOR1/APOE	18
GO:0043010	camera-type eye development	32/995	346/18888	0.0924855	1.75565	3.34525	0.00147268	0.023359	0.0197757	VAX1/NRP1/FZD5/NES/SOX1/EGFR/RPE65/DLX1/GNB1/DLX2/CLIC4/PLAAT3/DLL1/MAF/NOTCH2/PROM1/GJA1/SIX3/ATF4/FOXN4/SLITRK6/ABI2/ARHGAP35/CDKN1C/DLG1/DIO3/ACTL6A/CTNNB1/EPHB1/ZHX2/NFIB/TTLL5	32
GO:0007416	synapse assembly	22/995	208/18888	0.105769	2.00781	3.44645	0.00148423	0.0234699	0.0198696	GAP43/FZD5/PTPRS/GABRB2/FLRT2/NRXN1/SLITRK2/SLIT1/NTN1/APP/GABRA1/LGI2/SLITRK6/NTNG2/GNPAT/DNER/OGT/GABRG2/CTNNB1/EPHB1/FLRT3/DLG5	22
GO:0007097	nuclear migration	6/995	25/18888	0.24	4.5559	4.19532	0.00157119	0.0246936	0.0209055	LMNB1/LMNB2/SLIT1/DCTN1/NTN1/LMNA	6
GO:0021884	forebrain neuron development	6/995	25/18888	0.24	4.5559	4.19532	0.00157119	0.0246936	0.0209055	NRP1/SOX1/DCLK2/LHX8/UBB/ZMIZ1	6
GO:1902692	regulation of neuroblast proliferation	9/995	53/18888	0.169811	3.22351	3.82249	0.00164681	0.0257791	0.0218246	ID4/VAX1/FZD3/SIX3/ASPM/TP53/VCAN/CTNNA1/CTNNB1	9
GO:0090090	negative regulation of canonical Wnt signaling pathway	17/995	145/18888	0.117241	2.22558	3.49348	0.00165027	0.0257791	0.0218246	MDK/LIMD1/ANKRD6/RBX1/MAD2L2/FZD6/IGFBP2/CTNNBIP1/FOXO1/CTNNB1/CCDC88C/RUVBL2/ISL1/TLE4/APC2/APOE/FUZ	17
GO:1902903	regulation of supramolecular fiber organization	35/995	392/18888	0.0892857	1.6949	3.27853	0.00166502	0.025931	0.0219531	TMSB4Y/TMSB10/TMSB15A/NRP1/CKAP2/PSRC1/PFN1/ELN/DCTN1/CLIP3/CXCL12/SEMA5A/RHOA/APP/TRIOBP/SLIT2/CKAP5/TBCD/GBA2/RB1/ABI2/ARHGAP35/RHOC/CDK5RAP2/CLU/CHRNA7/DLG1/CORO2B/TSC1/NUMA1/WASHC5/CAPG/HDGFL3/APC2/APOE	35
GO:0016055	Wnt signaling pathway	40/995	466/18888	0.0858369	1.62943	3.24434	0.00169237	0.0262775	0.0222465	MDK/FZD5/EGFR/LIMD1/FZD3/ANKRD6/PPP1CA/CSNK2B/DLX5/SEMA5A/RHOA/RBX1/APP/MAD2L2/ZNF703/ASPM/FZD6/IGFBP2/CTNNBIP1/FZD8/FOXO1/DVL2/RNF138/CTNNB1/DEPDC1B/EGF/BCL7B/CCDC88C/RUVBL2/CSNK1G2/VCP/ISL1/TLE4/RNF14/DAAM1/CCNE1/CELSR1/APC2/APOE/FUZ	40
GO:0061008	hepaticobiliary system development	17/995	146/18888	0.116438	2.21034	3.462	0.00177842	0.0275308	0.0233075	MDK/UCP2/EGFR/COBL/HNRNPD/DUT/NOTCH2/E2F8/TYMS/CADM1/PCNA/ONECUT2/EZH2/E2F7/ZMPSTE24/PTCH1/ZIC3	17
GO:0006635	fatty acid beta-oxidation	11/995	75/18888	0.146667	2.78416	3.65079	0.00181985	0.0280159	0.0237182	ETFB/ACAT2/MTLN/ECHDC2/PLIN5/CROT/HADHA/AKT1/SCP2/ECHS1/DECR1	11
GO:0050890	cognition	30/995	322/18888	0.0931677	1.76859	3.28033	0.00182063	0.0280159	0.0237182	MDK/SYT4/RELN/LHX8/NRXN1/EGFR/B2M/EIF4EBP2/GPI/DNAH11/SORCS3/APP/SCN2A/SLC6A1/COMT/PLK2/S100B/NTAN1/VDAC1/CHRNA7/PPT1/GRIN2B/KIT/TSC1/FEN1/AFF2/CRH/PAK6/EIF4A3/APOE	30
GO:0198738	cell-cell signaling by wnt	40/995	468/18888	0.0854701	1.62247	3.2155	0.00182968	0.0280714	0.0237652	MDK/FZD5/EGFR/LIMD1/FZD3/ANKRD6/PPP1CA/CSNK2B/DLX5/SEMA5A/RHOA/RBX1/APP/MAD2L2/ZNF703/ASPM/FZD6/IGFBP2/CTNNBIP1/FZD8/FOXO1/DVL2/RNF138/CTNNB1/DEPDC1B/EGF/BCL7B/CCDC88C/RUVBL2/CSNK1G2/VCP/ISL1/TLE4/RNF14/DAAM1/CCNE1/CELSR1/APC2/APOE/FUZ	40
GO:0009191	ribonucleoside diphosphate catabolic process	13/995	98/18888	0.132653	2.51814	3.55315	0.00187048	0.0284203	0.0240606	ENO2/PKM/UCP2/GPI/PGAM1/PRKACA/APP/HKDC1/ALDOC/OGT/NUDT5/SLC4A4/ENO4	13
GO:0046031	ADP metabolic process	13/995	98/18888	0.132653	2.51814	3.55315	0.00187048	0.0284203	0.0240606	ENO2/PKM/UCP2/GPI/PGAM1/PRKACA/APP/HKDC1/ALDOC/OGT/SLC4A4/ENO4/AK5	13
GO:0051987	positive regulation of attachment of spindle microtubules to kinetochore	4/995	11/18888	0.363636	6.90288	4.61791	0.00187463	0.0284203	0.0240606	CCNB1/AURKB/BIRC5/RCC2	4
GO:0060623	regulation of chromosome condensation	4/995	11/18888	0.363636	6.90288	4.61791	0.00187463	0.0284203	0.0240606	SMC2/SMC4/NCAPH/NCAPD2	4
GO:0031103	axon regeneration	9/995	54/18888	0.166667	3.16382	3.7549	0.0018855	0.0284203	0.0240606	GAP43/DHFR/NEFL/PTPRS/TNC/CTNNA1/TSPO/CERS2/GRN	9
GO:0048146	positive regulation of fibroblast proliferation	9/995	54/18888	0.166667	3.16382	3.7549	0.0018855	0.0284203	0.0240606	CDK6/EGFR/CCNB1/DHX9/CCNA2/MIF/E2F1/ZMIZ1/RNASEH2B	9
GO:0006044	N-acetylglucosamine metabolic process	5/995	18/18888	0.277778	5.27303	4.27699	0.0019352	0.0290844	0.0246228	RENBP/CHST7/GNPDA1/NAGK/AMDHD2	5
GO:0016048	detection of temperature stimulus	6/995	26/18888	0.230769	4.38067	4.06769	0.00195262	0.0292609	0.0247722	GRIK2/CXCL12/SCN9A/CXCR4/COMT/EPHB1	6
GO:0009123	nucleoside monophosphate metabolic process	11/995	76/18888	0.144737	2.74753	3.59969	0.0020287	0.0303129	0.0256628	DPYD/DUT/TYMS/SHMT1/ADK/TK1/DLG1/DLG2/CMPK1/NT5M/AK5	11
GO:0030705	cytoskeleton-dependent intracellular transport	21/995	200/18888	0.105	1.99321	3.32985	0.00205521	0.0306203	0.025923	UCHL1/NEFL/SYT4/LAMP1/FNBP1L/MAP6/F8A1/UBB/DYNC1I2/HAP1/CLIP3/TUBB/APP/COPG2/TUBA1B/MYO10/DLG2/CCDC88C/KIF5C/RAB27B/FUZ	21
GO:0007040	lysosome organization	14/995	111/18888	0.126126	2.39424	3.47406	0.00207253	0.0307008	0.0259912	LAMP1/ABCA1/CLN6/CHMP3/TPP1/ATP10B/PPT1/NAGPA/CHMP1A/HPS1/WASHC5/GRN/LAMTOR1/SPNS1	14
GO:0080171	lytic vacuole organization	14/995	111/18888	0.126126	2.39424	3.47406	0.00207253	0.0307008	0.0259912	LAMP1/ABCA1/CLN6/CHMP3/TPP1/ATP10B/PPT1/NAGPA/CHMP1A/HPS1/WASHC5/GRN/LAMTOR1/SPNS1	14
GO:0006998	nuclear envelope organization	9/995	55/18888	0.163636	3.1063	3.68886	0.00215103	0.0317723	0.0268984	LMNB1/LMNB2/UBE2I/DCTN1/CHMP3/NEMP1/LMNA/ZMPSTE24/CHMP1A	9
GO:0044774	mitotic DNA integrity checkpoint signaling	12/995	88/18888	0.136364	2.58858	3.52227	0.00217724	0.0320676	0.0271483	CDK1/PRKDC/RFWD3/TP53/E2F7/CHEK2/PLK2/TAOK2/CLSPN/CHEK1/BLM/RPA2	12
GO:0008038	neuron recognition	8/995	45/18888	0.177778	3.37474	3.76096	0.00218377	0.0320721	0.0271522	GAP43/NRP1/ROBO1/SEMA5A/APP/CXCR4/FEZF2/ARHGAP35	8
GO:0031016	pancreas development	11/995	77/18888	0.142857	2.71184	3.5494	0.00225661	0.0329925	0.0279314	CDK6/DLL1/NKX6-2/ONECUT2/PCSK1/ILDR2/AKT1/CTNNB1/BMP6/ISL1/ZIC3	11
GO:0006282	regulation of DNA repair	22/995	215/18888	0.102326	1.94244	3.2773	0.00225923	0.0329925	0.0279314	FUS/DEK/EGFR/DHX9/FOXM1/MORF4L1/PRKDC/PCNA/MAD2L2/SMARCA2/RAD51/SMARCE1/SPIRE1/SMARCC1/PBRM1/ACTL6A/PARPBP/BCL7B/RUVBL2/CHEK1/RAD51AP1/RPA2	22
GO:0071241	cellular response to inorganic substance	23/995	229/18888	0.100437	1.90658	3.25485	0.00231421	0.0336999	0.0285303	HMOX1/ADGRV1/SYT4/UCP2/EGFR/HNRNPD/CCNA2/B2M/NQO1/CLIC4/MT3/ATF4/RAD51/CHUK/FOXO1/ECT2/TSPO/AKT1/DLG2/BMP6/BLM/IQGAP1/EIF4A3	23
GO:1901292	nucleoside phosphate catabolic process	19/995	176/18888	0.107955	2.04929	3.29795	0.00239548	0.0344151	0.0291357	ENO2/PKM/UCP2/DPYD/GPI/DUT/PGAM1/PRKACA/APP/HINT1/HKDC1/ALDOC/OGT/NUDT5/SLC4A4/ENO4/VCP/NT5M/ACOT7	19
GO:0001843	neural tube closure	12/995	89/18888	0.134831	2.55949	3.47747	0.0023987	0.0344151	0.0291357	PFN1/COBL/FZD3/TEAD2/PRKACA/FZD6/ARHGAP35/DVL2/TSC1/PTCH1/CELSR1/FUZ	12
GO:0010875	positive regulation of cholesterol efflux	6/995	27/18888	0.222222	4.21843	3.94634	0.0024001	0.0344151	0.0291357	ABCG1/ABCA1/RXRA/PTCH1/EEPD1/APOE	6
GO:0099170	postsynaptic modulation of chemical synaptic transmission	6/995	27/18888	0.222222	4.21843	3.94634	0.0024001	0.0344151	0.0291357	NEFL/DCC/SORCS3/PRKACA/RNF19A/EIF4A3	6
GO:1902410	mitotic cytokinetic process	6/995	27/18888	0.222222	4.21843	3.94634	0.0024001	0.0344151	0.0291357	CHMP3/RHOA/CEP55/CNTROB/CHMP1A/IQGAP1	6
GO:0002065	columnar/cuboidal epithelial cell differentiation	15/995	125/18888	0.12	2.27795	3.38041	0.00240338	0.0344151	0.0291357	VAX1/CDK6/FZD5/FASN/POU3F2/DLL1/TYMS/TUBB/NKX6-2/GJA1/AKT1/CTNNB1/BMP6/NFIB/DLG5	15
GO:0000212	meiotic spindle organization	5/995	19/18888	0.263158	4.9955	4.1089	0.00251359	0.0357601	0.0302744	CCNB2/NDC80/ESPL1/ASPM/WASHC5	5
GO:0050965	detection of temperature stimulus involved in sensory perception of pain	5/995	19/18888	0.263158	4.9955	4.1089	0.00251359	0.0357601	0.0302744	CXCL12/SCN9A/CXCR4/COMT/EPHB1	5
GO:0030308	negative regulation of cell growth	20/995	190/18888	0.105263	1.9982	3.26099	0.00251812	0.0357601	0.0302744	NRP1/PSRC1/PTPRS/SLIT1/DCC/CDKN2C/NTN1/SEMA5A/MT3/GJA1/SLIT2/TP53/FOXP1/SMARCA2/G6PD/RB1/SH3BP4/PPT1/SEMA3C/RGS2	20
GO:0072331	signal transduction by p53 class mediator	19/995	177/18888	0.107345	2.03771	3.2709	0.00255472	0.0361802	0.0306301	HNRNPK/UBB/MIF/FOXM1/AURKB/E2F1/TP53/NDRG1/HINT1/E2F2/E2F7/ZMPSTE24/CHEK2/PLK2/AKT1/COPS3/CHEK1/TP53BP2/RFFL	19
GO:0007613	memory	15/995	126/18888	0.119048	2.25987	3.34598	0.00259873	0.0367026	0.0310723	MDK/SYT4/RELN/EIF4EBP2/SORCS3/SCN2A/SLC6A1/COMT/PLK2/S100B/NTAN1/CHRNA7/FEN1/PAK6/APOE	15
GO:0120032	regulation of plasma membrane bounded cell projection assembly	21/995	204/18888	0.102941	1.95412	3.23099	0.00261338	0.0367563	0.0311178	GAP43/DPYSL3/NRP1/AUTS2/PFN1/COBL/FNBP1L/HAP1/MAP4/SLIT2/CNTROB/ABI2/ARHGAP35/RCC2/MYO10/AKT1/KIT/MAPK15/ANLN/MNS1/FUZ	21
GO:0051258	protein polymerization	27/995	287/18888	0.0940767	1.78585	3.16347	0.00261909	0.0367563	0.0311178	TMSB4Y/TMSB10/TMSB15A/NEFL/PSRC1/UBE2C/PFN1/COBL/ELN/DCTN1/CLIP3/CHMP3/MAP4/TRIOBP/SLIT2/CKAP5/TBCD/GBA2/CDK5RAP2/SPIRE1/TPPP3/DLG1/NIN/NUMA1/WASHC5/CAPG/HDGFL3	27
GO:0097305	response to alcohol	25/995	259/18888	0.0965251	1.83233	3.18054	0.00263218	0.0367563	0.0311178	GNRH1/NEFL/CDK1/ABCA1/HNRNPD/NQO1/GNB1/TYMS/TNC/SLIT2/MLC1/G6PD/RAD51/COMT/CTNNA1/CAT/TSPO/IGFBP7/AKT1/GRIN2B/CTNNB1/RGS2/BLM/PTCH1/CRH	25
GO:0006096	glycolytic process	12/995	90/18888	0.133333	2.53106	3.43327	0.00263818	0.0367563	0.0311178	ENO2/PKM/UCP2/GPI/PGAM1/PRKACA/APP/HKDC1/ALDOC/OGT/SLC4A4/ENO4	12
GO:0060606	tube closure	12/995	90/18888	0.133333	2.53106	3.43327	0.00263818	0.0367563	0.0311178	PFN1/COBL/FZD3/TEAD2/PRKACA/FZD6/ARHGAP35/DVL2/TSC1/PTCH1/CELSR1/FUZ	12
GO:0009134	nucleoside diphosphate catabolic process	13/995	102/18888	0.127451	2.41939	3.38951	0.00268447	0.0369544	0.0312855	ENO2/PKM/UCP2/GPI/PGAM1/PRKACA/APP/HKDC1/ALDOC/OGT/NUDT5/SLC4A4/ENO4	13
GO:0000022	mitotic spindle elongation	4/995	12/18888	0.333333	6.32764	4.35333	0.00269541	0.0369544	0.0312855	PRC1/AURKB/BIRC5/NUMA1	4
GO:0006054	N-acetylneuraminate metabolic process	4/995	12/18888	0.333333	6.32764	4.35333	0.00269541	0.0369544	0.0312855	RENBP/GNPDA1/NAGK/AMDHD2	4
GO:0072310	glomerular epithelial cell development	4/995	12/18888	0.333333	6.32764	4.35333	0.00269541	0.0369544	0.0312855	NOTCH2/ASXL1/IQGAP1/FOXJ1	4
GO:0090306	meiotic spindle assembly	4/995	12/18888	0.333333	6.32764	4.35333	0.00269541	0.0369544	0.0312855	CCNB2/NDC80/ASPM/WASHC5	4
GO:0097475	motor neuron migration	4/995	12/18888	0.333333	6.32764	4.35333	0.00269541	0.0369544	0.0312855	NRP1/RELN/FZD3/NTN1	4
GO:0045005	DNA-templated DNA replication maintenance of fidelity	9/995	57/18888	0.157895	2.9973	3.5612	0.00277103	0.0378903	0.0320778	NUCKS1/MMS22L/PCNA/GEN1/RFWD3/TRAIP/RAD51/FAM111A/BLM	9
GO:0032355	response to estradiol	14/995	115/18888	0.121739	2.31096	3.32525	0.0028914	0.0393083	0.0332783	EGFR/HNRNPD/CCNA2/NQO1/GPI/PCNA/ZNF703/SLC6A1/IGFBP2/EZH2/CAT/CTNNB1/RUVBL2/PTCH1	14
GO:0051963	regulation of synapse assembly	14/995	115/18888	0.121739	2.31096	3.32525	0.0028914	0.0393083	0.0332783	PTPRS/FLRT2/NRXN1/SLITRK2/SLIT1/NTN1/APP/SLITRK6/NTNG2/OGT/CTNNB1/EPHB1/FLRT3/DLG5	14
GO:0000305	response to oxygen radical	6/995	28/18888	0.214286	4.06777	3.83073	0.00292048	0.0393083	0.0332783	DHFR/UCP2/NQO1/MT3/TXNRD2/FANCC	6
GO:0045686	negative regulation of glial cell differentiation	6/995	28/18888	0.214286	4.06777	3.83073	0.00292048	0.0393083	0.0332783	ID4/DLX1/DLX2/NKX6-2/CTNNB1/TMEM98	6
GO:0060966	regulation of gene silencing by regulatory ncRNA	6/995	28/18888	0.214286	4.06777	3.83073	0.00292048	0.0393083	0.0332783	DGCR8/ELAVL1/TP53/ZMPSTE24/ADAR/PRKRA	6
GO:2000819	regulation of nucleotide-excision repair	6/995	28/18888	0.214286	4.06777	3.83073	0.00292048	0.0393083	0.0332783	SMARCA2/SMARCE1/SMARCC1/PBRM1/ACTL6A/BCL7B	6
GO:0060491	regulation of cell projection assembly	21/995	206/18888	0.101942	1.93515	3.1824	0.00293722	0.0394307	0.0333819	GAP43/DPYSL3/NRP1/AUTS2/PFN1/COBL/FNBP1L/HAP1/MAP4/SLIT2/CNTROB/ABI2/ARHGAP35/RCC2/MYO10/AKT1/KIT/MAPK15/ANLN/MNS1/FUZ	21
GO:0042176	regulation of protein catabolic process	32/995	362/18888	0.0883978	1.67805	3.07167	0.00300016	0.040171	0.0340087	ANXA2/EGFR/TRIB3/F8A1/UBB/PSMC3/NQO1/SUMO2/PSME1/RBX1/CDC20/PRKACA/MAD2L2/CTSA/RNF19A/CLU/CHEK2/PLK2/FOXO1/MAD2L1/AKT1/SH3RF3/SMARCC1/OGT/PSME2/FAM83D/RNFT2/NELL1/VCP/PSMC5/APC2/APOE	32
GO:0021536	diencephalon development	11/995	80/18888	0.1375	2.61015	3.40323	0.00306744	0.0409655	0.0346813	NRP1/POU3F2/UBB/HAP1/SEMA5A/NKX2-1/SIX3/PCSK1/CTNNB1/ISL1/CRH	11
GO:0009166	nucleotide catabolic process	18/995	167/18888	0.107784	2.04606	3.20186	0.0031276	0.0415744	0.0351968	ENO2/PKM/UCP2/DPYD/GPI/DUT/PGAM1/PRKACA/APP/HINT1/HKDC1/ALDOC/OGT/SLC4A4/ENO4/VCP/NT5M/ACOT7	18
GO:0048168	regulation of neuronal synaptic plasticity	9/995	58/18888	0.155172	2.94562	3.49945	0.00312989	0.0415744	0.0351968	GRIK2/SYT4/APP/S100B/DBN1/GRIN2B/KIT/RAB8A/APOE	9
GO:0030010	establishment of cell polarity	17/995	154/18888	0.11039	2.09552	3.21896	0.00313723	0.0415744	0.0351968	SHTN1/GPSM2/NDC80/DCTN1/RHOA/MAP4/GJA1/CENPA/SAPCD2/CDK5RAP2/MAD2L1/BRSK2/NUMA1/EPHB1/HDAC3/DYNLT1/FOXJ1	17
GO:0051445	regulation of meiotic cell cycle	10/995	69/18888	0.144928	2.75115	3.43637	0.00316184	0.0417591	0.0353532	ZWINT/CDC25B/KNL1/CDC20/CDC25C/ASPM/TTK/TRIP13/MAPK15/RAD51AP1	10
GO:0030516	regulation of axon extension	12/995	92/18888	0.130435	2.47603	3.34664	0.00317547	0.0417591	0.0353532	NRP1/SHTN1/PTPRS/ISLR2/SLIT1/CXCL12/NTN1/SEMA5A/MT3/SEMA3C/TTL/APOE	12
GO:0046032	ADP catabolic process	12/995	92/18888	0.130435	2.47603	3.34664	0.00317547	0.0417591	0.0353532	ENO2/PKM/UCP2/GPI/PGAM1/PRKACA/APP/HKDC1/ALDOC/OGT/SLC4A4/ENO4	12
GO:0043691	reverse cholesterol transport	5/995	20/18888	0.25	4.74573	3.95221	0.00320778	0.0420766	0.0356219	ABCG1/ABCA1/LIPG/CLU/APOE	5
GO:0070316	regulation of G0 to G1 transition	7/995	38/18888	0.184211	3.49685	3.63313	0.00331433	0.0433638	0.0367117	SMARCA2/SMARCE1/SMARCC1/PBRM1/ACTL6A/BCL7B/CHEK1	7
GO:0008037	cell recognition	17/995	155/18888	0.109677	2.082	3.18963	0.00335562	0.043793	0.0370751	GAP43/NRP1/LGALS3/CD9/ROBO1/SEMA5A/CADM1/APP/CXCR4/VCAN/FEZF2/ARHGAP35/DLG1/PTX3/EPHB1/TCP1/SPA17	17
GO:0019827	stem cell population maintenance	19/995	182/18888	0.104396	1.98173	3.13827	0.00349022	0.0454345	0.0384647	DLL1/GNL3/ELAVL1/LDB2/ASPM/SMARCA2/SMARCE1/FOXO1/SMARCC1/DDX6/OGT/ACTL6A/KIT/CTNNB1/BCL7B/FANCC/ZHX2/NFIB/ZIC3	19
GO:2000573	positive regulation of DNA biosynthetic process	10/995	70/18888	0.142857	2.71184	3.38359	0.00351866	0.0456019	0.0386065	CCNA2/AURKB/PCNA/NEK2/RFC2/CHTF18/CTNNB1/RFC4/MAPK15/TCP1	10
GO:0050951	sensory perception of temperature stimulus	6/995	29/18888	0.206897	3.9275	3.72039	0.00352077	0.0456019	0.0386065	GRIK2/CXCL12/SCN9A/CXCR4/COMT/EPHB1	6
GO:0006997	nucleus organization	16/995	143/18888	0.111888	2.12396	3.18148	0.00357715	0.046216	0.0391264	LMNB1/HMGB2/LMNB2/CDK1/UBE2I/DCTN1/SF1/CHMP3/NEMP1/LMNA/TPR/ZMPSTE24/NUMA1/AFF2/CHMP1A/CHEK1	16
GO:0021979	hypothalamus cell differentiation	4/995	13/18888	0.307692	5.8409	4.11723	0.00373233	0.0476241	0.0403185	NRP1/POU3F2/UBB/HAP1	4
GO:0034333	adherens junction assembly	4/995	13/18888	0.307692	5.8409	4.11723	0.00373233	0.0476241	0.0403185	ZNF703/TBCD/CTNNB1/DLG5	4
GO:0043928	exonucleolytic catabolism of deadenylated mRNA	4/995	13/18888	0.307692	5.8409	4.11723	0.00373233	0.0476241	0.0403185	EXOSC8/EXOSC2/NT5C3B/DCPS	4
GO:0071679	commissural neuron axon guidance	4/995	13/18888	0.307692	5.8409	4.11723	0.00373233	0.0476241	0.0403185	NRP1/FZD3/NFIB/PTCH1	4
GO:0090235	regulation of metaphase plate congression	4/995	13/18888	0.307692	5.8409	4.11723	0.00373233	0.0476241	0.0403185	AURKB/BIRC5/TTL/NUMA1	4
GO:0009062	fatty acid catabolic process	13/995	106/18888	0.122642	2.32809	3.23342	0.0037675	0.0478362	0.040498	ETFB/ACAT2/MTLN/ECHDC2/PLIN5/CROT/HADHA/AKT1/LPIN3/SCP2/ECHS1/DECR1/ACOT7	13
GO:0048709	oligodendrocyte differentiation	13/995	106/18888	0.122642	2.32809	3.23342	0.0037675	0.0478362	0.040498	ID4/MDK/SOX1/DLX1/DLX2/CDKN2C/NKX2-1/NKX6-2/CXCR4/CLU/CTNNB1/TMEM98/TSPAN2	13
GO:0072329	monocarboxylic acid catabolic process	15/995	131/18888	0.114504	2.17362	3.17857	0.00378257	0.0479095	0.0405601	ETFB/ACAT2/DCXR/MTLN/ECHDC2/PLIN5/FAH/CROT/HADHA/AKT1/LPIN3/SCP2/ECHS1/DECR1/ACOT7	15
GO:0019364	pyridine nucleotide catabolic process	12/995	94/18888	0.12766	2.42335	3.26225	0.00379798	0.0479868	0.0406255	ENO2/PKM/UCP2/GPI/PGAM1/PRKACA/APP/HKDC1/ALDOC/OGT/SLC4A4/ENO4	12
GO:0045746	negative regulation of Notch signaling pathway	7/995	39/18888	0.179487	3.40719	3.54854	0.00385908	0.0485209	0.0410777	DLL3/DLK1/DLX1/DLX2/CDK3/DLL1/AKT1	7
GO:0071312	cellular response to alkaloid	7/995	39/18888	0.179487	3.40719	3.54854	0.00385908	0.0485209	0.0410777	CCNA2/TMEM38B/RAD51/COMT/CHEK1/BLM/CRH	7
GO:0032206	positive regulation of telomere maintenance	10/995	71/18888	0.140845	2.67365	3.33173	0.0039067	0.0488812	0.0413827	HNRNPA2B1/HNRNPD/AURKB/GNL3/NEK2/ACTL6A/CTNNB1/RUVBL2/MAPK15/TCP1	10
GO:0035567	non-canonical Wnt signaling pathway	10/995	71/18888	0.140845	2.67365	3.33173	0.0039067	0.0488812	0.0413827	FZD5/FZD3/ANKRD6/RHOA/FZD6/FZD8/DVL2/CCDC88C/DAAM1/CELSR1	10
GO:0048675	axon extension	14/995	119/18888	0.117647	2.23328	3.18249	0.00395863	0.049411	0.0418312	NRP1/SHTN1/PTPRS/AUTS2/ISLR2/SLIT1/CXCL12/NTN1/SEMA5A/MT3/SLIT2/SEMA3C/TTL/APOE	14
GO:0007389	pattern specification process	39/995	474/18888	0.0822785	1.56189	2.92156	0.00399799	0.0497817	0.0421451	NRP1/FZD5/HES6/SOX1/DLL3/GAS8/RELN/ZIC1/COBL/ROBO1/DPCD/DLX1/DLX2/DLL1/PRKDC/NOTCH2/DNAH11/NKX2-1/GJA1/SIX3/EMX2/TP53/FOXN4/CTNNBIP1/FEZF2/PLXNA2/DVL2/SEMA3C/CTNNB1/SSBP3/SHROOM3/DNAI1/ISL1/PTCH1/ZIC3/FOXJ1/APC2/MNS1/FUZ	39

## Sheet: IP-InhibN_Up
ID	Description	GeneRatio	BgRatio	RichFactor	FoldEnrichment	zScore	pvalue	p.adjust	qvalue	geneID	Count
GO:0010975	regulation of neuron projection development	101/2107	460/18888	0.219565	1.96827	7.44975	1.30317e-11	7.7708e-08	6.71064e-08	PAK3/STMN2/SFRP1/CNR1/EFNB3/DPYSL5/SEZ6/NME2/MAP1B/SHTN1/CNTN1/FEZ1/PARP6/NRDC/APOE/AKT1/PAX6/ATP1B2/SCARB2/SPOCK1/METRN/SF3A2/L1CAM/DGUOK/CAPRIN1/FUT9/MEGF8/RND2/NEO1/PTPRD/CIB1/NTRK2/TBR1/BAIAP2/LIMK1/MAP2K1/NSMF/PTPRO/CTNNA2/RTN4R/CAMK2G/TOX/SEMA6C/CAPRIN2/RAPGEF1/FGF13/SNAP25/ANKRD27/PREX1/DVL1/NRP1/PRKCI/SEMA4F/CYFIP1/PTN/PAQR3/SYNGAP1/NTRK3/CDH4/GORASP1/ROBO2/STAU2/WNT7A/ULK2/TNR/FBXO7/STK2…	101
GO:0050808	synapse organization	105/2107	493/18888	0.212982	1.90925	7.24876	3.48898e-11	7.86459e-08	6.79163e-08	PAK3/SPOCK2/SEZ6L/NLGN4X/GPM6A/PRNP/EFNB3/CLSTN3/CHRDL1/CAMKV/GABRA2/SEZ6/MAP1B/RHOB/RAB3A/APOE/AKT1/SLC7A11/APP/ACTG1/MDGA1/WASF3/DNER/ERBB4/CTNND2/LRFN4/L1CAM/ABHD17B/CAPRIN1/PTPRD/PALM/FLRT3/SORT1/DNAJA3/NTRK2/BAIAP2/SDF4/GABRB3/SNCA/PTPRO/CTNNA2/APPL1/CTBP2/PCDH8/RAC3/CAPRIN2/FGF13/MAPK14/SNAP25/DVL1/NRP1/ZDHHC2/CAP2/CDH10/HIP1R/CYFIP1/PDZRN3/COL4A5/SYNGAP1/CACNB2/SPTBN4/ROBO2/GRIN2B/STAU2/WN…	105
GO:0099177	regulation of trans-synaptic signaling	105/2107	494/18888	0.212551	1.90539	7.22546	3.9567e-11	7.86459e-08	6.79163e-08	SYAP1/NSG1/NLGN4X/PRNP/CNR1/EFNB3/CLSTN3/CHRDL1/CAMKV/MAP1B/SQSTM1/CASK/RAB3A/APOE/CALB2/SLC7A11/APP/SLC6A9/HMGCR/CACNG7/PINK1/CACNG4/VAMP2/GNAI2/GIT1/MAPK1/GABBR1/GRIA2/PTPRD/SLC1A3/CPLX2/NTRK2/CAMK2A/PTPRA/BAIAP2/EIF4E/PLCB1/SNCA/CSPG5/NSMF/RIMS3/FABP5/SYNGR1/LGI1/NALCN/AKAP12/PCDH8/PACSIN2/PXK/ARRB2/SNAP25/BACE1/DVL1/SYT7/SERPINE2/ASIC1/ZDHHC2/GUCY1B1/CYFIP1/PTN/SYNGAP1/APBA1/STX1A/GRIN2B/STAU…	105
GO:0050804	modulation of chemical synaptic transmission	104/2107	493/18888	0.210953	1.89107	7.1038	7.78433e-11	1.16045e-07	1.00213e-07	SYAP1/NSG1/NLGN4X/PRNP/CNR1/EFNB3/CLSTN3/CHRDL1/CAMKV/MAP1B/SQSTM1/CASK/RAB3A/APOE/CALB2/SLC7A11/APP/SLC6A9/HMGCR/CACNG7/PINK1/CACNG4/VAMP2/GNAI2/GIT1/MAPK1/GABBR1/GRIA2/PTPRD/SLC1A3/CPLX2/NTRK2/CAMK2A/PTPRA/BAIAP2/EIF4E/PLCB1/SNCA/CSPG5/NSMF/RIMS3/SYNGR1/LGI1/NALCN/AKAP12/PCDH8/PACSIN2/PXK/ARRB2/SNAP25/BACE1/DVL1/SYT7/SERPINE2/ASIC1/ZDHHC2/GUCY1B1/CYFIP1/PTN/SYNGAP1/APBA1/STX1A/GRIN2B/STAU2/PDE9…	104
GO:0007015	actin filament organization	98/2107	467/18888	0.20985	1.88118	6.83238	3.71889e-10	4.43515e-07	3.83007e-07	PAK3/TMOD2/SFRP1/RND3/CLASP2/SHTN1/RHOB/PIK3R2/ARPC2/FSCN1/CORO7/ACTG1/WASF3/GDPD2/NCKAP1/TMSB4X/BIN1/FAT1/CUL3/ZEB2/RAC1/CYFIP2/TTC17/CD47/RND2/PLS3/ZYX/GAS7/TAGLN3/NF2/SHROOM2/RHOC/TMSB15B/BAIAP2/PPP1R9B/ARPC3/LIMK1/ELMO2/BCAR1/SPTBN1/CTNNA2/MTSS1/PPM1E/RAC3/WIPF3/HSP90B1/ARHGEF2/BRK1/PREX1/NRP1/ELMO1/TGFBR1/PRKCI/RHOQ/CAP2/CNN2/RHPN2/HIP1R/CYFIP1/HAX1/INF2/SPTBN4/TMOD3/CCN2/CDC42EP1/SPATC1L/FL…	98
GO:0006605	protein targeting	75/2107	327/18888	0.229358	2.05606	6.82598	7.33457e-10	7.18532e-07	6.20503e-07	HSPD1/CLU/PRNP/GOLGA7/HSP90AA1/SQSTM1/GABARAP/MTCH1/TOMM7/SEC61A2/PINK1/SCARB2/HSPA8/SAMM50/TOMM40/PITRM1/YWHAE/TOMM70/SGTB/PAM16/SORT1/CIB1/BAG6/RAB7A/AP3M1/HERPUD1/SYNGR1/AP4B1/USP36/HSPA4/PXK/VPS53/TOMM22/LAMP2/ARIH2/PEX6/ZFYVE16/ZDHHC2/PRKCI/RAB3IP/HAX1/HPCA/ABLIM3/HGS/UBE2L3/VPS13A/FBXO7/PDCD5/VPS8/TIMM23/GSK3A/GOLGA7B/ARL6IP1/TRAM1L1/SYNJ2BP/ZDHHC14/FBXW7/GIPC1/BID/NLGN1/NCOA4/VPS52/KCNB1/C…	75
GO:0099003	vesicle-mediated transport in synapse	57/2107	221/18888	0.257919	2.31209	6.95226	8.43489e-10	7.18532e-07	6.20503e-07	NSG1/ATP6V1A/NLGN4X/CANX/CASK/RAB3A/SCRIB/ATP6AP1/ACTG1/BIN1/VAMP2/ATP6V1G1/GIT1/NAPA/AP2A2/SCRN1/CADPS/CPLX2/PLAA/CALY/SNCA/CSPG5/RIMS3/ATP6AP2/CTBP2/AAK1/SNAP25/DVL1/SYT7/SH3GL3/VAC14/ATP6V1F/CYFIP1/STON2/HPCA/STX1A/WNT7A/PICALM/SYNDIG1/PPP3CC/FBXL20/GRIP2/SNAP91/SYN2/SYT9/DTNBP1/NLGN1/CACNB4/SNPH/SNX9/AMPH/VAMP4/PACSIN1/RAB27B/RIMS1/FBXO45/ATP6V1H	57
GO:0031346	positive regulation of cell projection organization	78/2107	360/18888	0.216667	1.94229	6.39625	5.30284e-09	3.9526e-06	3.41335e-06	STMN2/GPM6A/ARHGEF7/ENPP2/CNR1/HSP90AA1/NME2/MAP1B/SHTN1/CNTN1/FEZ1/PARP6/NRDC/APOE/ARPC2/FSCN1/NCKAP1/AKIRIN1/ATP1B2/SCARB2/METRN/SF3A2/L1CAM/RAC1/CAPRIN1/FUT9/MEGF8/RND2/PTPRD/PALM/NTRK2/BAIAP2/LIMK1/MAP2K1/MARK4/TOX/CAPRIN2/RAPGEF1/ANKRD27/BRK1/DVL1/NRP1/TGFBR1/PRKCI/RHOQ/CYFIP1/PTN/NTRK3/ATMIN/CDH4/ROBO2/DYNLL1/STAU2/DZIP1/CDC42EP1/STK24/FLNA/PRKD1/GRIP1/PLXNC1/EPS8/CAMK1/KAT2A/PLXND1/SS18L1/…	78
GO:0099504	synaptic vesicle cycle	50/2107	199/18888	0.251256	2.25236	6.29316	2.27628e-08	1.50066e-05	1.29593e-05	ATP6V1A/NLGN4X/CANX/CASK/RAB3A/SCRIB/ATP6AP1/ACTG1/BIN1/VAMP2/ATP6V1G1/GIT1/NAPA/SCRN1/CADPS/CPLX2/PLAA/SNCA/CSPG5/RIMS3/ATP6AP2/CTBP2/SNAP25/DVL1/SYT7/SH3GL3/ATP6V1F/CYFIP1/STON2/STX1A/WNT7A/PICALM/SYNDIG1/PPP3CC/FBXL20/SNAP91/SYN2/SYT9/DTNBP1/NLGN1/CACNB4/SNPH/SNX9/AMPH/VAMP4/PACSIN1/RAB27B/RIMS1/FBXO45/ATP6V1H	50
GO:0043254	regulation of protein-containing complex assembly	85/2107	418/18888	0.203349	1.82291	6.0285	2.51663e-08	1.50066e-05	1.29593e-05	PAK3/TMOD2/STMN2/CLU/ARHGEF7/HSP90AA1/MAP1B/RIOK3/STMP1/SIRT2/APOE/PIK3R2/ARPC2/FSCN1/NCKAP1/MSN/TMSB4X/PINK1/BIN1/HSPA8/RAC1/CYFIP2/LCMT1/GIT1/NAPA/MAPK8/DDX3X/RHOC/TMSB15B/BAIAP2/ARPC3/SPTBN1/CALY/SNCA/MARK4/BAX/ANKRD27/ABCA3/BRK1/PREX1/SLF2/HIP1R/AMBRA1/CYFIP1/HAX1/SEPTIN8/MAVS/STX1A/SOX9/SPTBN4/INSM1/TMOD3/CRYAB/DHX33/CDC42EP1/VPS8/PRKD1/PEX5/NCK2/PRKCE/JAM3/TRAF2/BAK1/TPPP3/HAUS2/ADD3/SPTBN2…	85
GO:1903829	positive regulation of protein localization	94/2107	483/18888	0.194617	1.74463	5.87419	4.34858e-08	2.35732e-05	2.03572e-05	PRNP/NKX6-1/ATP2B4/HSP90AA1/CLSTN3/OAZ1/SQSTM1/PIK3R2/WLS/AKT1/FRMD4A/TOMM7/MSN/ERBB4/ACSL4/PINK1/NECAB2/VAMP2/YWHAE/ABHD17B/SESN2/CCT4/TOMM70/CIB1/TMEM35A/NF2/PPP1R9B/RIPOR1/PPID/PLCB1/SPTBN1/SNCA/MARK4/TMEM132A/BICD1/IRS2/USP36/MAPK14/SNAP25/GLUD1/DVL1/ZPR1/ARIH2/GPR27/SLC5A3/ZDHHC2/PRKCI/CD81/HPCA/MAVS/ABLIM3/MPC2/DYNLL1/WNT7A/UBE2L3/DZIP1/PDCD5/DKC1/FLNA/PRKD1/PCK2/MCU/PTPN9/GNAI1/C2CD2L/GSK3…	94
GO:0016236	macroautophagy	72/2107	343/18888	0.209913	1.88174	5.83955	7.87749e-08	3.74094e-05	3.23056e-05	UCHL1/ATP6V1A/MAP1LC3B/MAP1LC3A/ATG4A/SQSTM1/GABARAP/FEZ1/ATP6V0C/OPTN/AKT1/EI24/VPS26B/TOMM7/CAPNS1/PINK1/NRBP2/ATP6V1G1/SESN2/CHMP5/MAPK8/CASP3/PLAA/RAB7A/CTSD/UVRAG/TP53INP1/VTI1B/PIP4K2B/ATP6V0E2/CLEC16A/SESN1/CALCOCO2/USP36/VPS36/LAMP2/AMBRA1/EMC6/HGS/ULK2/FBXO7/NBR1/ATG2B/VTA1/EFNB1/TBC1D12/PEX5/TRAF6/GSK3A/ATG4C/LRSAM1/HIF1A/RALB/ATP6V0B/TIGAR/FBXW7/SNX4/ATG2A/RIPK2/HDAC10/STAM/TEX264/HUWE…	72
GO:0016049	cell growth	95/2107	496/18888	0.191532	1.71697	5.73368	8.15566e-08	3.74094e-05	3.23056e-05	PSMD10/USP9X/RBBP7/SFRP1/CPNE1/CDKN1A/NKX6-1/CLSTN3/GNG4/MAP1B/RNF157/MEAF6/SHTN1/CDKN2D/SPAG9/APOE/AKT1/EI24/APP/DCLK1/OLFM1/CACNG7/SPOCK1/LAMTOR2/L1CAM/CYFIP2/SESN2/MEGF8/RND2/FLRT3/TOMM70/CIB1/DDX3X/PLAA/PPP1R9B/SLC23A2/LTBP4/LIMK1/BCAR1/RTN4R/LGI1/SEMA6C/DDX49/CAPRIN2/FGF13/DVL1/CAMK2D/NRP1/TTL/ARIH2/TGFBR1/SERPINE2/SEMA4F/DACT3/CYFIP1/CHPT1/ADAM15/CDH4/SOX9/CDKN2AIP/ULK2/BRAT1/TNR/CRYAB/MEIS…	95
GO:0034329	cell junction assembly	88/2107	453/18888	0.19426	1.74143	5.65982	1.27323e-07	5.42306e-05	4.68319e-05	SPOCK2/SFRP1/NLGN4X/GPM6A/ARHGEF7/GPM6B/EFNB3/CLSTN3/CDH20/GABRA2/MAP1B/CLASP2/FSCN1/APP/ACTG1/MDGA1/DNER/ERBB4/CTNNA1/PRKCA/LRFN4/RAC1/MAP4K4/PTPRD/FLRT3/EPB41L3/NTRK2/RHOC/PTPRA/GABRB3/SNCA/PTPRO/RAPGEF1/FGF13/SNAP25/PTPRK/DVL1/NRP1/DST/ZDHHC2/CDH10/CDH24/CDH4/ROBO2/STAU2/TNS1/WNT7A/CDH11/SYNDIG1/THBS2/FBF1/JAM3/DUSP22/THY1/ACTN1/MPDZ/NRG3/SPTBN2/F11R/CDH22/LRRTM2/PLXND1/GABRA4/NLGN1/RCC2/GABRA…	88
GO:1990778	protein localization to cell periphery	73/2107	356/18888	0.205056	1.83821	5.65744	1.7075e-07	6.78789e-05	5.86182e-05	PSMD10/ATP1B1/BCL2L1/NSG1/PRNP/ATP2B4/GOLGA7/CLASP2/SQSTM1/RAB3A/PIK3R2/SCRIB/PACS1/OPTN/AKT1/ATP6AP1/BSG/ERBB4/CACNG7/SCARB2/VAMP2/TUB/ABCA2/PALM/CIB1/EPB41L3/RAB10/EFR3B/PPP1R9B/RAB7A/SPTBN1/SNCA/VTI1B/APPL1/LGI1/STX7/FGF13/SNAP25/CSK/ZDHHC2/PRKCI/RHOQ/CD81/CACNB2/SPTBN4/GORASP1/PICALM/GRIP2/TSPAN33/FLNA/IQSEC2/GRIP1/DENND4C/NETO2/PTPN9/GNAI1/PRKCE/RAMP1/EZR/NKD2/F11R/MAP7/KCNB1/ARHGAP44/INPP5K…	73
GO:0001764	neuron migration	45/2107	183/18888	0.245902	2.20436	5.80107	2.20893e-07	7.7216e-05	6.66815e-05	DCX/USP9X/CHL1/DDIT4/GPM6A/NKX6-1/HSP90AA1/MAP1B/SHTN1/PAX6/MDGA1/ARX/DCLK1/DNER/SPOCK1/RAC1/YWHAE/NEO1/NTRK2/CAMK2A/PLAA/CELSR2/BAX/NSMF/CTNNA2/FGF13/CEP85L/ARHGEF2/NRP1/COL3A1/SEPTIN4/CDK5R2/FLNA/KIAA0319L/PEX5/ASTN1/NRG3/PRKG1/ASCL1/SCRT2/STAT3/NTNG1/ASTN2/ITGA3/FBXO45	45
GO:0032970	regulation of actin filament-based process	77/2107	385/18888	0.2	1.79288	5.56958	2.30332e-07	7.7216e-05	6.66815e-05	PAK3/TMOD2/SFRP1/RND3/GPM6B/CLASP2/PIK3R2/ARPC2/FSCN1/ACTG1/WASF3/NCKAP1/TMSB4X/BIN1/ZEB2/RAC1/CYFIP2/CD47/RND2/NF2/RHOC/TMSB15B/BAIAP2/ARPC3/LIMK1/SPTBN1/CTNNA2/MTSS1/PPM1E/BCAS3/RAC3/FGF13/BRK1/PREX1/CAMK2D/NRP1/TGFBR1/RHOQ/CNN2/RHPN2/HIP1R/CYFIP1/HAX1/SPTBN4/STAU2/TMOD3/CCN2/CDC42EP1/PDGFA/FLNA/PRKD1/NCK2/PRKCE/JAM3/PDPN/ADD3/PDGFRB/SPTBN2/F11R/EPS8/SPTAN1/DSG2/NCK1/SNX9/FER/HCN4/ARHGAP44/WNT4…	77
GO:0007264	small GTPase-mediated signal transduction	94/2107	500/18888	0.188	1.68531	5.50311	2.33085e-07	7.7216e-05	6.66815e-05	RND3/ARHGEF7/CDKN1A/SHTN1/RHOB/SQSTM1/GABARAP/APOE/NCKAP1/ARHGEF4/CUL3/RAC1/MAP4K4/ADCYAP1R1/GIT1/RND2/AMOT/RUNDC3A/RASA3/RAB4A/DNAJA3/SIPA1L2/STMN3/KSR1/RHOC/RIPOR1/LIMK1/CHML/RTN4R/RALGPS2/RAC3/RAPGEF1/ARHGDIG/KBTBD6/ARHGEF2/BRK1/PREX1/NRP1/ELMO1/PLEKHG5/COL3A1/RHOQ/HACE1/VAV2/CYFIP1/DOK6/ARHGEF3/DOCK3/PPP2CB/SYNGAP1/RAPGEFL1/RAP2C/SIAH2/DHCR24/SH2D3C/RAB39B/CDC42EP1/ARHGAP20/CYTH3/RAB9B/IQSEC2…	94
GO:0072594	establishment of protein localization to organelle	87/2107	454/18888	0.19163	1.71785	5.486	2.78723e-07	8.7475e-05	7.55409e-05	USP9X/HSPD1/CLU/CDKN1A/HSP90AA1/SQSTM1/PIK3R2/SCRIB/MTCH1/AKT1/KPNA1/TNPO3/TOMM7/SEC61A2/CACNG7/PINK1/CACNG4/SCARB2/HSPA8/SAMM50/TOMM40/PITRM1/CCT4/TOMM70/SGTB/PAM16/SORT1/RAB10/BAG6/RAB7A/NUP133/COX18/AP3M1/BAX/APPL1/HERPUD1/USP36/HSPA4/CRY2/PXK/MAPK14/VPS53/TOMM22/KPNA6/VPS36/ZPR1/LAMP2/ARIH2/PEX6/ZFYVE16/HAX1/MAVS/ABLIM3/HGS/UBE2L3/VPS13A/FBXO7/PDCD5/DKC1/VPS8/FLNA/PRKD1/TIMM23/PEX5/GSK3A/PEX2…	87
GO:0007409	axonogenesis	87/2107	455/18888	0.191209	1.71407	5.4633	3.0771e-07	9.17438e-05	7.92273e-05	USP9X/CHL1/PAK3/UCHL1/NKX6-1/EFNB3/DPYSL5/MAP1B/SHTN1/CNTN1/RAB3A/FEZ1/NRDC/APOE/PAX6/APP/ACTG1/ARX/DCLK1/OLFM1/METRN/L1CAM/RAC1/CYFIP2/VANGL2/MEGF8/RND2/DLX5/NEO1/FLRT3/ETV1/NTRK2/S100A6/B4GALT5/RAB10/TBR1/BAIAP2/LIMK1/MAP2K1/PTPRO/CTNNA2/RTN4R/NTN4/LGI1/SEMA6C/RAC3/NRXN3/FGF13/SNAP25/DVL1/NRP1/TTL/SEMA4F/CYFIP1/SYNGAP1/B4GAT1/CDH4/SPTBN4/ROBO2/CDK5R2/WNT7A/PICALM/ULK2/TNR/CDH11/EFNB1/UST/EPHB6/…	87
GO:1902414	protein localization to cell junction	31/2107	108/18888	0.287037	2.57312	5.80938	4.71759e-07	0.000133957	0.000115681	NSG1/CLSTN3/SCRIB/ACTG1/ERBB4/CACNG7/LAMTOR2/ABHD17B/MAPK8IP3/BAIAP2/LGI1/SNAP25/KIF3A/DVL1/ZDHHC2/STAU2/WNT7A/STAU1/GRIP2/FLNA/IQSEC2/GRIP1/NETO2/JAM3/F11R/NLGN1/ARHGAP44/ADAM10/FERMT2/RAB27B/MPP7	31
GO:0090150	establishment of protein localization to membrane	59/2107	277/18888	0.212996	1.90939	5.40266	6.89857e-07	0.000186983	0.000161473	ATP1B1/NSG1/PRNP/GOLGA7/HSP90AA1/SCRIB/MTCH1/OPTN/ATP6AP1/TOMM7/SEC61A2/SCARB2/VAMP2/SAMM50/TOMM40/TOMM70/SGTB/CIB1/RAB10/BAG6/RAB7A/COX18/SPTBN1/BAX/HSPA4/SNAP25/TOMM22/CSK/ZDHHC2/PRKCI/RAB3IP/EMC6/HPCA/GORASP1/GRIP2/PDCD5/GRIP1/PEX5/GOLGA7B/PEX26/NOMO1/ARL6IP1/TRAM1L1/ZDHHC14/BID/KCNB1/ARHGAP44/CHM/RTP5/RFTN1/MTCL1/BCS1L/INPP5K/MICALL1/SEC61G/MYO1C/PKDCC/ZDHHC6/C2CD5	59
GO:0010506	regulation of autophagy	71/2107	357/18888	0.19888	1.78284	5.29128	8.37297e-07	0.000214259	0.000185028	CDK16/EEF1A2/UCHL1/ATP6V1A/SQSTM1/FEZ1/SIRT2/ATP6V0C/PIK3R2/OPTN/AKT1/VPS26B/SLC7A5/CAPNS1/PINK1/NRBP2/ATP6V1G1/SESN2/MAPK8/CASP3/TRIM23/UVRAG/SNCA/TP53INP1/PIP4K2B/FOXK2/ATP6V0E2/CLEC16A/SESN1/USP10/CALCOCO2/USP36/AMBRA1/HAX1/DHRSX/MID2/ULK2/RAB39B/FBXO7/KAT8/PRKD1/ENDOG/GSK3A/TRIM22/HERC1/LRSAM1/HIF1A/KEAP1/RALB/ATP6V0B/TIGAR/FBXW7/SNX4/ATG2A/RIPK2/PLK3/STAT3/ERCC4/MTCL1/USP20/TPCN1/BAD/VPS13C/…	71
GO:0032956	regulation of actin cytoskeleton organization	69/2107	344/18888	0.200581	1.79809	5.29341	8.62354e-07	0.000214259	0.000185028	PAK3/TMOD2/SFRP1/RND3/GPM6B/CLASP2/PIK3R2/ARPC2/FSCN1/ACTG1/WASF3/NCKAP1/TMSB4X/BIN1/RAC1/CYFIP2/CD47/RND2/NF2/RHOC/TMSB15B/BAIAP2/ARPC3/LIMK1/SPTBN1/CTNNA2/MTSS1/PPM1E/BCAS3/RAC3/BRK1/PREX1/NRP1/TGFBR1/RHOQ/RHPN2/HIP1R/CYFIP1/HAX1/SPTBN4/STAU2/TMOD3/CCN2/CDC42EP1/PDGFA/FLNA/PRKD1/NCK2/PRKCE/JAM3/ADD3/PDGFRB/SPTBN2/F11R/EPS8/SPTAN1/NCK1/SNX9/FER/ARHGAP44/WNT4/FAM107A/CARMIL3/INPP5K/PTK2B/WHAMM/MK…	69
GO:0042391	regulation of membrane potential	84/2107	446/18888	0.188341	1.68836	5.21298	9.37866e-07	0.0002237	0.000193181	ATP1B1/GNAQ/BCL2L1/ATP1A3/NLGN4X/CNR1/GABRA2/SEZ6/AKT1/APP/PINK1/ATP1B2/BIN1/YWHAE/CACNA2D1/CACNA1H/GABBR1/GRIA2/INSYN1/NTRK2/BAIAP2/GABRB3/SNCA/BAX/RIMS3/NALCN/PPA2/FGF13/ARRB2/SOD2/DVL1/CAMK2D/ASIC1/GABRB1/SLC25A27/TUSC2/CACNB2/STX1A/DYNLL1/GRIN2B/WNT7A/CACNA1I/KCND3/FLNA/ATP1A1/KCNJ3/SLC25A33/KCNC2/GSK3A/KCNK3/BAK1/SLC1A6/TRPV1/GABRA4/SCN9A/BID/NLGN1/CACNB4/KCNB1/DSG2/HCN2/GABRA3/RGS7BP/HCN4/G…	84
GO:0072659	protein localization to plasma membrane	61/2107	293/18888	0.208191	1.86631	5.29558	1.01335e-06	0.000232407	0.0002007	PSMD10/ATP1B1/BCL2L1/NSG1/PRNP/ATP2B4/GOLGA7/CLASP2/SQSTM1/RAB3A/PIK3R2/SCRIB/PACS1/OPTN/AKT1/ATP6AP1/BSG/SCARB2/VAMP2/PALM/CIB1/EPB41L3/RAB10/EFR3B/PPP1R9B/RAB7A/SPTBN1/VTI1B/APPL1/STX7/FGF13/CSK/ZDHHC2/PRKCI/RHOQ/CD81/CACNB2/SPTBN4/GORASP1/PICALM/GRIP2/TSPAN33/FLNA/GRIP1/DENND4C/PTPN9/PRKCE/RAMP1/EZR/NKD2/F11R/MAP7/KCNB1/ARHGAP44/INPP5K/PACSIN1/SORBS1/PKDCC/C2CD5/IKBKB/ITGA3	61
GO:0050806	positive regulation of synaptic transmission	42/2107	177/18888	0.237288	2.12715	5.33855	1.51901e-06	0.000335477	0.000289708	NSG1/PRNP/EFNB3/CLSTN3/SQSTM1/APOE/CALB2/APP/HMGCR/CACNG7/PINK1/CACNG4/VAMP2/MAPK1/SLC1A3/NTRK2/SNCA/RIMS3/LGI1/NALCN/ARRB2/SNAP25/SERPINE2/ZDHHC2/PTN/STX1A/GRIN2B/PDE9A/TNR/STAU1/IQSEC2/PRKCE/ADCY1/EIF2AK4/LRRTM2/DTNBP1/NLGN1/CLSTN2/FAM107A/PTK2B/SCGN/RIMS1	42
GO:0036465	synaptic vesicle recycling	25/2107	82/18888	0.304878	2.73305	5.57282	1.76193e-06	0.000375227	0.000324035	NLGN4X/CANX/RAB3A/SCRIB/ACTG1/BIN1/VAMP2/GIT1/PLAA/SNCA/SYT7/SH3GL3/CYFIP1/STON2/STX1A/WNT7A/PICALM/PPP3CC/SNAP91/NLGN1/SNX9/AMPH/VAMP4/PACSIN1/RAB27B	25
GO:0048167	regulation of synaptic plasticity	48/2107	216/18888	0.222222	1.99209	5.19622	2.11655e-06	0.000435206	0.000375831	SYAP1/NSG1/PRNP/CHRDL1/MAP1B/SQSTM1/RAB3A/APOE/CALB2/APP/HMGCR/VAMP2/MAPK1/CPLX2/NTRK2/CAMK2A/BAIAP2/SNCA/NSMF/RIMS3/SYNGR1/SNAP25/SYT7/SERPINE2/ZDHHC2/PTN/SYNGAP1/GRIN2B/STAU2/PDE9A/TNR/STAU1/IQSEC2/SHISA9/ADCY1/CPEB3/ABHD6/EIF2AK4/LRRTM2/KAT2A/GIPC1/KCNB1/SLC4A10/GRID2/FAM107A/PTK2B/SCGN/RIMS1	48
GO:1902903	regulation of supramolecular fiber organization	74/2107	392/18888	0.188776	1.69226	4.9077	3.75926e-06	0.000730677	0.000630991	PAK3/TMOD2/STMN2/SFRP1/CLU/ARHGEF7/MAP1B/CLASP2/APOE/PIK3R2/ARPC2/APP/ACTG1/WASF3/NCKAP1/TMSB4X/BIN1/HSPA8/RAC1/CYFIP2/GIT1/CD47/CIB1/NF2/RHOC/TMSB15B/BAIAP2/ARPC3/LIMK1/SPTBN1/SNCA/CTNNA2/MTSS1/PPM1E/FGF13/ARHGEF2/BRK1/PREX1/NRP1/TGFBR1/RHPN2/HIP1R/CYFIP1/HAX1/SPTBN4/TMOD3/CRYAB/CCN2/CDC42EP1/FLNA/PRKD1/NCK2/PRKCE/TPX2/HAUS2/ADD3/SPTBN2/F11R/EPS8/SPTAN1/MID1/NCK1/SNX9/FER/WNT4/CARMIL3/INPP5K/PTK…	74
GO:0046390	ribose phosphate biosynthetic process	50/2107	233/18888	0.214592	1.92369	5.02704	3.79859e-06	0.000730677	0.000630991	CTPS2/ATP5F1B/SLC25A1/ATP6V1A/PDK3/ATP5MG/ADCY2/NME2/NME1/ATP6V0C/ACOT7/TMSB4X/ACSL4/PINK1/ATP5F1C/NDUFA7/NDUFB5/ATIC/NDUFC1/ATP5MC2/ACSBG1/NDUFS8/SNCA/CTPS1/PDHX/ACAT1/NDUFA6/PRPSAP1/GUCY1B1/NUDT2/SLC25A13/MPC2/SDHA/UCK2/SDHB/HACD2/UPP1/NDUFB4/ADCY1/ATP5PD/AK1/ELOVL1/ADCY3/NPPC/PDK1/UCKL1/GUCY1A2/PANK1/PRPS2/PPARA	50
GO:0008154	actin polymerization or depolymerization	44/2107	196/18888	0.22449	2.01242	5.04853	4.1811e-06	0.000779122	0.000672827	PAK3/TMOD2/PIK3R2/ARPC2/CORO7/WASF3/NCKAP1/TMSB4X/BIN1/RAC1/CYFIP2/TTC17/GAS7/TMSB15B/BAIAP2/PPP1R9B/ARPC3/SPTBN1/BRK1/PREX1/HIP1R/CYFIP1/HAX1/INF2/SPTBN4/TMOD3/CDC42EP1/SPATC1L/NCK2/PRKCE/MICAL1/ADD3/DIAPH2/SPTBN2/EPS8/SPTAN1/PSTPIP2/NCK1/SNX9/FER/FAM107A/PTK2B/MKKS/WDR1	44
GO:0016358	dendrite development	50/2107	235/18888	0.212766	1.90732	4.95935	4.89854e-06	0.000885152	0.000764391	PAK3/DPYSL5/SEZ6/MAP1B/TRAPPC4/PARP6/APOE/APP/DCLK1/CTNND2/CAPRIN1/PTPRD/MINK1/CAMK2A/CELSR2/BAIAP2/PPP1R9B/NSMF/CTNNA2/CAPRIN2/ANKRD27/PREX1/DVL1/NRP1/CYFIP1/PTN/SYNGAP1/GORASP1/STAU2/MEF2A/BTBD3/WNT7A/PICALM/NCK2/CPEB3/IGF2BP1/CAMK1/PRKG1/SS18L1/DTNBP1/KIF1A/NLGN1/ARHGAP44/TMEM106B/PACSIN1/HECW1/HECW2/ZNF365/ZNF296/PRICKLE1	50
GO:0016241	regulation of macroautophagy	40/2107	173/18888	0.231214	2.07269	5.02237	5.27505e-06	0.000909448	0.000785373	UCHL1/ATP6V1A/FEZ1/ATP6V0C/OPTN/AKT1/VPS26B/CAPNS1/PINK1/NRBP2/ATP6V1G1/SESN2/MAPK8/CASP3/UVRAG/PIP4K2B/ATP6V0E2/CLEC16A/SESN1/CALCOCO2/USP36/AMBRA1/FBXO7/GSK3A/LRSAM1/HIF1A/RALB/ATP6V0B/TIGAR/FBXW7/SNX4/ATG2A/RIPK2/VPS13C/ERN1/SNX18/PIP4K2A/LARP1/HTT/ATP6V1H	40
GO:0030041	actin filament polymerization	39/2107	167/18888	0.233533	2.09348	5.02934	5.33803e-06	0.000909448	0.000785373	PAK3/TMOD2/PIK3R2/ARPC2/CORO7/WASF3/NCKAP1/TMSB4X/BIN1/RAC1/CYFIP2/TTC17/GAS7/TMSB15B/BAIAP2/ARPC3/SPTBN1/PREX1/HIP1R/CYFIP1/HAX1/INF2/SPTBN4/TMOD3/CDC42EP1/NCK2/PRKCE/ADD3/DIAPH2/SPTBN2/EPS8/SPTAN1/PSTPIP2/NCK1/SNX9/FER/FAM107A/PTK2B/MKKS	39
GO:0006644	phospholipid metabolic process	72/2107	383/18888	0.18799	1.68521	4.8005	5.88998e-06	0.00097561	0.000842509	ENPP2/PIK3R2/FAR1/PCYT1B/ABCA2/LPCAT1/MBOAT7/PI4KA/EFR3B/PLAA/FDFT1/PTDSS1/CAPN2/PLCB1/PLPPR1/UVRAG/SNCA/PIP4K2B/PGAP1/FABP5/PEMT/PIP4P1/CLN8/LPCAT4/ABCA3/DGKD/PITPNM1/VAC14/CHPT1/SELENOI/INPP5B/MTMR6/PLPPR2/INPP5A/ABHD5/IDH1/GDPD1/PDGFA/GNB3/NR1H3/PIGZ/ABHD6/PRDX6/PDGFRB/SERINC5/INPP4A/HMGCS1/DGKE/PITPNM2/LPL/SGPP1/PCYT2/PIGA/IDI1/SGMS1/PLPPR5/SCARB1/DGKZ/PLCD1/DHRS7B/INPP5K/GDE1/SOCS7/PLCB3/PIP…	72
GO:0001558	regulation of cell growth	77/2107	418/18888	0.184211	1.65134	4.77162	6.1595e-06	0.000992678	0.000857248	PSMD10/RBBP7/SFRP1/CDKN1A/NKX6-1/CLSTN3/GNG4/MAP1B/RNF157/MEAF6/SHTN1/CDKN2D/SPAG9/APOE/AKT1/EI24/OLFM1/CACNG7/SPOCK1/LAMTOR2/L1CAM/SESN2/MEGF8/RND2/TOMM70/CIB1/DDX3X/PLAA/PPP1R9B/SLC23A2/LTBP4/LIMK1/BCAR1/RTN4R/LGI1/SEMA6C/DDX49/CAPRIN2/FGF13/CAMK2D/NRP1/TTL/TGFBR1/SERPINE2/SEMA4F/DACT3/CYFIP1/CHPT1/ADAM15/CDH4/CDKN2AIP/ULK2/BRAT1/TNR/CRYAB/SLC25A33/GSK3A/IGFBP4/CPNE6/NRG3/SYT17/KAT7/SEMA7A/CDK1…	77
GO:0007008	outer mitochondrial membrane organization	9/2107	15/18888	0.6	5.37864	6.01132	7.01963e-06	0.00107328	0.000926856	HSP90AA1/MTCH1/TOMM7/SAMM50/TOMM40/TOMM70/HSPA4/TOMM22/PDCD5	9
GO:0045040	protein insertion into mitochondrial outer membrane	9/2107	15/18888	0.6	5.37864	6.01132	7.01963e-06	0.00107328	0.000926856	HSP90AA1/MTCH1/TOMM7/SAMM50/TOMM40/TOMM70/HSPA4/TOMM22/PDCD5	9
GO:0009260	ribonucleotide biosynthetic process	48/2107	226/18888	0.212389	1.90394	4.8442	7.90023e-06	0.00117773	0.00101705	CTPS2/ATP5F1B/SLC25A1/ATP6V1A/PDK3/ATP5MG/ADCY2/NME2/NME1/ATP6V0C/ACOT7/TMSB4X/ACSL4/PINK1/ATP5F1C/NDUFA7/NDUFB5/ATIC/NDUFC1/ATP5MC2/ACSBG1/NDUFS8/SNCA/CTPS1/PDHX/ACAT1/NDUFA6/GUCY1B1/NUDT2/SLC25A13/MPC2/SDHA/UCK2/SDHB/HACD2/UPP1/NDUFB4/ADCY1/ATP5PD/AK1/ELOVL1/ADCY3/NPPC/PDK1/UCKL1/GUCY1A2/PANK1/PPARA	48
GO:0035418	protein localization to synapse	23/2107	78/18888	0.294872	2.64335	5.15333	8.41892e-06	0.00122444	0.00105739	NSG1/CLSTN3/SCRIB/ERBB4/CACNG7/ABHD17B/MAPK8IP3/BAIAP2/LGI1/SNAP25/DVL1/ZDHHC2/STAU2/WNT7A/STAU1/GRIP2/IQSEC2/GRIP1/NETO2/NLGN1/ARHGAP44/ADAM10/RAB27B	23
GO:0110053	regulation of actin filament organization	55/2107	273/18888	0.201465	1.80602	4.75333	9.40578e-06	0.00131932	0.00113933	PAK3/TMOD2/SFRP1/CLASP2/PIK3R2/ARPC2/ACTG1/WASF3/NCKAP1/TMSB4X/BIN1/RAC1/CYFIP2/CD47/NF2/RHOC/TMSB15B/BAIAP2/ARPC3/LIMK1/SPTBN1/CTNNA2/MTSS1/PPM1E/BRK1/PREX1/NRP1/TGFBR1/RHPN2/HIP1R/CYFIP1/HAX1/SPTBN4/TMOD3/CCN2/CDC42EP1/FLNA/NCK2/PRKCE/ADD3/SPTBN2/F11R/EPS8/SPTAN1/NCK1/SNX9/FER/WNT4/CARMIL3/INPP5K/PTK2B/WHAMM/MKKS/FERMT2/WDR1	55
GO:0009165	nucleotide biosynthetic process	58/2107	293/18888	0.197952	1.77452	4.73451	9.51379e-06	0.00131932	0.00113933	CTPS2/ATP5F1B/SLC25A1/ATP6V1A/PDK3/ATP5MG/ADCY2/NME2/NME1/NMNAT2/ATP6V0C/NADK2/ACOT7/TMSB4X/ACSL4/PINK1/DGUOK/ATP5F1C/NDUFA7/NDUFB5/ATIC/NDUFC1/ATP5MC2/ACSBG1/NDUFS8/SNCA/DCTD/CTPS1/PDHX/ACAT1/NDUFA6/PRPSAP1/GUCY1B1/NUDT2/SLC25A13/MPC2/SDHA/UCK2/SDHB/HACD2/UPP1/NDUFB4/ADCY1/ATP5PD/RRM1/AK1/ELOVL1/NMNAT3/ADCY3/NPPC/NADK/PDK1/UCKL1/GUCY1A2/GUCA1B/PANK1/PRPS2/PPARA	58
GO:0051258	protein polymerization	57/2107	287/18888	0.198606	1.78039	4.7205	1.02133e-05	0.00138413	0.00119529	PAK3/TMOD2/STMN2/ARHGEF7/HSP90AA1/MAP1B/CLASP2/PIK3R2/ARPC2/CORO7/WASF3/NCKAP1/TMSB4X/PINK1/BIN1/RAC1/CYFIP2/TTC17/GIT1/CSNK1D/GAS7/TMSB15B/BAIAP2/ARPC3/SPTBN1/SNCA/FGF13/PREX1/HIP1R/AMBRA1/CYFIP1/HAX1/INF2/SPTBN4/TUBG2/TMOD3/CDC42EP1/NCK2/PRKCE/TPX2/TPPP3/HAUS2/ADD3/DIAPH2/SPTBN2/EPS8/SPTAN1/PSTPIP2/NCK1/SNX9/FER/FAM107A/PTK2B/SSNA1/MKKS/HAUS5/NAV3	57
GO:0031334	positive regulation of protein-containing complex assembly	43/2107	197/18888	0.218274	1.9567	4.78295	1.13032e-05	0.0014978	0.00129346	CLU/HSP90AA1/MAP1B/STMP1/ARPC2/FSCN1/NCKAP1/MSN/PINK1/BIN1/RAC1/GIT1/MAPK8/DDX3X/RHOC/BAIAP2/CALY/SNCA/MARK4/BAX/ABCA3/BRK1/SLF2/HIP1R/AMBRA1/MAVS/DHX33/CDC42EP1/PRKD1/NCK2/PRKCE/BAK1/TPPP3/BID/NCK1/SNX9/FER/PTK2B/FERMT2/ISG15/BMF/NAV3/MPP7	43
GO:1901293	nucleoside phosphate biosynthetic process	58/2107	295/18888	0.19661	1.76249	4.6771	1.17727e-05	0.0015261	0.00131789	CTPS2/ATP5F1B/SLC25A1/ATP6V1A/PDK3/ATP5MG/ADCY2/NME2/NME1/NMNAT2/ATP6V0C/NADK2/ACOT7/TMSB4X/ACSL4/PINK1/DGUOK/ATP5F1C/NDUFA7/NDUFB5/ATIC/NDUFC1/ATP5MC2/ACSBG1/NDUFS8/SNCA/DCTD/CTPS1/PDHX/ACAT1/NDUFA6/PRPSAP1/GUCY1B1/NUDT2/SLC25A13/MPC2/SDHA/UCK2/SDHB/HACD2/UPP1/NDUFB4/ADCY1/ATP5PD/RRM1/AK1/ELOVL1/NMNAT3/ADCY3/NPPC/NADK/PDK1/UCKL1/GUCY1A2/GUCA1B/PANK1/PRPS2/PPARA	58
GO:0016197	endosomal transport	57/2107	289/18888	0.197232	1.76807	4.66238	1.26588e-05	0.00160605	0.00138694	NSG1/LAPTM4B/RAB6B/STX16/SQSTM1/SPAG9/SCRIB/ATP6AP1/VPS26B/DCLK1/MSN/SCARB2/MAPK1/CHMP5/SORT1/NF2/DENND2A/RAB10/RAB7A/MAP2K1/TMEM50B/CALY/VTI1B/BLOC1S2/CLEC16A/WIPF3/RAB11FIP4/PXK/VPS53/SNAP25/STX6/ANKRD27/VPS36/ZFYVE16/ZDHHC2/HGS/PICALM/GRIP2/VTA1/FLNA/RAB9B/SLC66A2/GRIP1/EZR/REPS2/SNX4/VPS52/PLEKHA3/DENND1B/SNX9/STAM/ARHGAP44/HOOK1/VAMP4/MICALL1/HOOK2/SNX18	57
GO:0000422	autophagy of mitochondrion	27/2107	102/18888	0.264706	2.37293	4.92648	1.33714e-05	0.00166112	0.0014345	MAP1LC3B/MAP1LC3A/ATG4A/SQSTM1/GABARAP/OPTN/SPATA18/TOMM7/PINK1/FUNDC1/USP36/AMBRA1/HAX1/ULK2/FBXO7/ATG2B/GSK3A/ATG4C/HIF1A/TIGAR/FBXW7/ATG2A/HUWE1/VPS13C/FUNDC2/HTT/RETREG1	27
GO:1905475	regulation of protein localization to membrane	40/2107	180/18888	0.222222	1.99209	4.73891	1.44593e-05	0.00175961	0.00151955	BCL2L1/PRNP/ATP2B4/SQSTM1/PIK3R2/AKT1/SLC7A11/NECAB2/CIB1/PPP1R9B/SPTBN1/VTI1B/APPL1/STX7/CSK/SLC5A3/ZDHHC2/PRKCI/RHOQ/CD81/HPCA/PICALM/PDCD5/IQSEC2/NETO2/PTPN9/PRKCE/EZR/NKD2/KCNB1/ARHGAP44/MTCL1/INPP5K/SORBS1/ADAM10/MYO1C/PKDCC/C2CD5/EFCAB7/ITGA3	40
GO:0072522	purine-containing compound biosynthetic process	53/2107	264/18888	0.200758	1.79967	4.63641	1.50313e-05	0.00179263	0.00154807	ATP5F1B/SLC25A1/ATP6V1A/PDK3/ATP5MG/ADCY2/NME2/NME1/NMNAT2/ATP6V0C/NADK2/ACOT7/TMSB4X/ACSL4/PINK1/DGUOK/ATP5F1C/NDUFA7/NDUFB5/ATIC/NDUFC1/ATP5MC2/ACSBG1/NDUFS8/SNCA/PDHX/ACAT1/NDUFA6/PRPSAP1/GUCY1B1/NUDT2/SLC25A13/MPC2/SDHA/SDHB/HACD2/NDUFB4/ADCY1/ATP5PD/AK1/ELOVL1/NMNAT3/ADCY3/NPPC/NADK/PDK1/GUCY1A2/GUCA1B/PANK1/PRPS2/PPARA/PGM2/ADA2	53
GO:0048588	developmental cell growth	49/2107	238/18888	0.205882	1.84561	4.65185	1.54845e-05	0.00181047	0.00156347	USP9X/CPNE1/NKX6-1/MAP1B/RNF157/SHTN1/SPAG9/APOE/APP/DCLK1/OLFM1/CACNG7/L1CAM/CYFIP2/MEGF8/RND2/FLRT3/TOMM70/PLAA/SLC23A2/LIMK1/RTN4R/SEMA6C/FGF13/DVL1/NRP1/TTL/ARIH2/SEMA4F/CYFIP1/CDH4/SOX9/ULK2/TNR/MEIS1/GSK3A/CPNE6/EIF2AK4/SYT17/PRKG1/ALCAM/SEMA7A/ST8SIA2/SSNA1/NRN1/PPARA/PAK6/RIMS1/PRICKLE1	49
GO:0072666	establishment of protein localization to vacuole	20/2107	65/18888	0.307692	2.75828	5.03158	1.60259e-05	0.00181434	0.00156681	CLU/SQSTM1/CACNG7/CACNG4/SCARB2/HSPA8/SORT1/RAB7A/AP3M1/PXK/VPS53/VPS36/LAMP2/ZFYVE16/HGS/VPS13A/VPS8/NCOA4/STAM/VPS13C	20
GO:0007611	learning or memory	55/2107	278/18888	0.197842	1.77353	4.60398	1.62637e-05	0.00181434	0.00156681	CCND2/TMOD2/SPECC1/NLGN4X/PRNP/NPTX2/CNR1/ATXN1/CAMK2N1/APOE/PAX6/SLC7A11/APP/HMGCR/VDAC3/GIT1/MAPK1/ATP8A1/CASP3/NTRK2/TBR1/PPP1R9B/PLCB1/B4GALT2/BTG2/AMFR/NRXN3/CLN8/FGF13/SNAP25/ASIC1/BRINP1/PTN/SYNGAP1/GRIN2B/PICALM/TNR/ADCY1/CPEB3/GM2A/EIF2AK4/MAN2B1/HIF1A/KAT2A/RCAN1/INSR/ADCY3/PTCHD1/CLSTN2/B2M/PDE1B/PAK6/HTT/ITGA3/GABRA5	55
GO:0001836	release of cytochrome c from mitochondria	18/2107	55/18888	0.327273	2.93381	5.08908	1.64304e-05	0.00181434	0.00156681	PSMD10/BCL2L1/CLU/BBC3/AKT1/GHITM/PINK1/BAX/SOD2/TRIAP1/PDCD5/BAK1/GGCT/BID/BAD/IFI6/BMF/FXN	18
GO:0008088	axo-dendritic transport	22/2107	76/18888	0.289474	2.59496	4.93678	1.81578e-05	0.00193706	0.00167279	UCHL1/FEZ1/APP/DYNC1H1/KIF1B/ARL8A/MAPK8IP3/AP3M1/CALY/BLOC1S2/KIF3A/DST/APBA1/STAU2/STAU1/BORCS5/HSBP1/HIF1A/DTNBP1/KIF1A/TERF2/RAB27B	22
GO:0010232	vascular transport	24/2107	87/18888	0.275862	2.47294	4.87931	1.88273e-05	0.00193706	0.00167279	ATP2B4/LRP2/LRP3/APOE/SLC7A5/SLC6A9/SLC1A4/ATP1B2/SLC1A2/ABCA2/SLC1A3/ATP8A1/FABP5/SLC5A3/SLC1A5/SLC2A3/SLCO3A1/SLC7A1/SLC13A3/INSR/SLC6A17/SLC7A3/SLC2A13/SLC24A3	24
GO:0150104	transport across blood-brain barrier	24/2107	87/18888	0.275862	2.47294	4.87931	1.88273e-05	0.00193706	0.00167279	ATP2B4/LRP2/LRP3/APOE/SLC7A5/SLC6A9/SLC1A4/ATP1B2/SLC1A2/ABCA2/SLC1A3/ATP8A1/FABP5/SLC5A3/SLC1A5/SLC2A3/SLCO3A1/SLC7A1/SLC13A3/INSR/SLC6A17/SLC7A3/SLC2A13/SLC24A3	24
GO:0070585	protein localization to mitochondrion	31/2107	127/18888	0.244094	2.18816	4.76052	1.88411e-05	0.00193706	0.00167279	HSPD1/HSP90AA1/MTCH1/AKT1/TOMM7/PINK1/SAMM50/TOMM40/PITRM1/TOMM70/PAM16/COX18/BAX/USP36/HSPA4/TOMM22/ARIH2/HAX1/MAVS/ABLIM3/UBE2L3/FBXO7/PDCD5/TIMM23/GSK3A/FBXW7/BID/HUWE1/TOMM34/BCS1L/ISG15	31
GO:0010508	positive regulation of autophagy	35/2107	152/18888	0.230263	2.06417	4.66767	2.18772e-05	0.00220927	0.00190786	CDK16/SQSTM1/OPTN/PINK1/SESN2/TRIM23/UVRAG/TP53INP1/PIP4K2B/SESN1/CALCOCO2/AMBRA1/DHRSX/MID2/ULK2/FBXO7/PRKD1/ENDOG/GSK3A/TRIM22/LRSAM1/HIF1A/RALB/SNX4/ATG2A/RIPK2/PLK3/USP20/TPCN1/BAD/TFEB/SNX18/PIP4K2A/LARP1/HTT	35
GO:0048813	dendrite morphogenesis	33/2107	140/18888	0.235714	2.11304	4.68383	2.23604e-05	0.00220927	0.00190786	PAK3/DPYSL5/PARP6/DCLK1/CTNND2/CAPRIN1/PTPRD/MINK1/CELSR2/BAIAP2/NSMF/CTNNA2/CAPRIN2/ANKRD27/DVL1/NRP1/PTN/GORASP1/STAU2/MEF2A/BTBD3/WNT7A/PICALM/IGF2BP1/SS18L1/DTNBP1/KIF1A/NLGN1/ARHGAP44/TMEM106B/HECW1/HECW2/ZNF365	33
GO:1990138	neuron projection extension	39/2107	177/18888	0.220339	1.97521	4.61892	2.26002e-05	0.00220927	0.00190786	USP9X/CPNE1/NKX6-1/MAP1B/RNF157/SHTN1/SPAG9/APOE/DCLK1/OLFM1/CACNG7/L1CAM/CYFIP2/MEGF8/FLRT3/PLAA/SLC23A2/LIMK1/RTN4R/SEMA6C/DVL1/NRP1/TTL/SEMA4F/CYFIP1/CDH4/ULK2/TNR/CPNE6/EIF2AK4/SYT17/ALCAM/SEMA7A/ST8SIA2/SSNA1/NRN1/PAK6/RIMS1/PRICKLE1	39
GO:0140238	presynaptic endocytosis	21/2107	72/18888	0.291667	2.61462	4.86382	2.4645e-05	0.00237029	0.00204691	NLGN4X/CANX/SCRIB/ACTG1/BIN1/VAMP2/SNCA/AAK1/SYT7/SH3GL3/STON2/STX1A/PICALM/PPP3CC/SNAP91/NLGN1/SNX9/AMPH/VAMP4/PACSIN1/RAB27B	21
GO:0006164	purine nucleotide biosynthetic process	51/2107	256/18888	0.199219	1.78588	4.4859	2.67899e-05	0.00253569	0.00218975	ATP5F1B/SLC25A1/ATP6V1A/PDK3/ATP5MG/ADCY2/NME2/NME1/NMNAT2/ATP6V0C/NADK2/ACOT7/TMSB4X/ACSL4/PINK1/DGUOK/ATP5F1C/NDUFA7/NDUFB5/ATIC/NDUFC1/ATP5MC2/ACSBG1/NDUFS8/SNCA/PDHX/ACAT1/NDUFA6/PRPSAP1/GUCY1B1/NUDT2/SLC25A13/MPC2/SDHA/SDHB/HACD2/NDUFB4/ADCY1/ATP5PD/AK1/ELOVL1/NMNAT3/ADCY3/NPPC/NADK/PDK1/GUCY1A2/GUCA1B/PANK1/PRPS2/PPARA	51
GO:0032271	regulation of protein polymerization	43/2107	204/18888	0.210784	1.88956	4.52645	2.77869e-05	0.00258895	0.00223575	PAK3/TMOD2/STMN2/ARHGEF7/HSP90AA1/MAP1B/PIK3R2/ARPC2/NCKAP1/TMSB4X/PINK1/BIN1/RAC1/CYFIP2/GIT1/TMSB15B/BAIAP2/ARPC3/SPTBN1/SNCA/PREX1/HIP1R/AMBRA1/CYFIP1/HAX1/SPTBN4/TMOD3/CDC42EP1/NCK2/PRKCE/TPPP3/HAUS2/ADD3/SPTBN2/EPS8/SPTAN1/NCK1/SNX9/FER/PTK2B/MKKS/HAUS5/NAV3	43
GO:0048709	oligodendrocyte differentiation	27/2107	106/18888	0.254717	2.28339	4.69509	2.83637e-05	0.00260204	0.00224705	NKX6-2/CLU/NKX6-1/GPM6B/DLX2/PLP1/CNTN1/SOX8/PAX6/NKX2-2/WASF3/ABCA2/NTRK2/B4GALT5/TNFRSF21/EIF2B2/CSK/PTN/SOX9/MIOS/DLX1/DUSP15/TENM4/ASCL1/HDAC11/ZNF365/WDR1	27
GO:0061572	actin filament bundle organization	37/2107	167/18888	0.221557	1.98613	4.53556	3.19123e-05	0.00288323	0.00248987	SFRP1/CLASP2/SHTN1/PIK3R2/FSCN1/ACTG1/CUL3/ZEB2/RAC1/CD47/PLS3/ZYX/NF2/RHOC/BAIAP2/LIMK1/MTSS1/PPM1E/HSP90B1/NRP1/TGFBR1/RHPN2/CCN2/FLNA/ARRB1/MICAL1/ACTN1/EZR/F11R/EPS8/WNT4/FAM107A/INPP5K/SORBS1/PTK2B/MKKS/FERMT2	37
GO:0010976	positive regulation of neuron projection development	36/2107	161/18888	0.223602	2.00446	4.53542	3.2967e-05	0.00293406	0.00253377	STMN2/CNR1/NME2/CNTN1/FEZ1/APOE/ATP1B2/SCARB2/SF3A2/CAPRIN1/FUT9/NTRK2/BAIAP2/TOX/CAPRIN2/RAPGEF1/ANKRD27/DVL1/PRKCI/CYFIP1/PTN/NTRK3/STAU2/STK24/FLNA/PRKD1/CAMK1/NLGN1/NCK1/TMEM106B/PLPPR5/PACSIN1/PTK2B/ITGA3/TMEM30A/IGF1R	36
GO:1904951	positive regulation of establishment of protein localization	61/2107	326/18888	0.187117	1.67739	4.37159	3.4017e-05	0.00298299	0.00257603	PRNP/NKX6-1/HSP90AA1/OAZ1/PIK3R2/WLS/FRMD4A/TOMM7/ACSL4/PINK1/VAMP2/YWHAE/CCT4/TOMM70/CIB1/RIPOR1/PPID/PLCB1/TMEM132A/IRS2/USP36/MAPK14/SNAP25/GLUD1/ZPR1/ARIH2/GPR27/ZDHHC2/CD81/HPCA/MAVS/ABLIM3/MPC2/DYNLL1/UBE2L3/PDCD5/DKC1/FLNA/PRKD1/PCK2/MCU/C2CD2L/GSK3A/PRKCE/HIF1A/CAMK1/FBXW7/KCNB1/PLK3/HUWE1/NADK/MTCL1/BAD/TRH/MYO1C/IPO5/WRAP53/C2CD5/EFCAB7/ADAM8/TMEM30A	61
GO:1904375	regulation of protein localization to cell periphery	32/2107	137/18888	0.233577	2.09388	4.55324	3.58359e-05	0.00309695	0.00267444	BCL2L1/PRNP/ATP2B4/SQSTM1/PIK3R2/AKT1/ABCA2/CIB1/PPP1R9B/SPTBN1/SNCA/VTI1B/APPL1/STX7/CSK/ZDHHC2/PRKCI/RHOQ/PICALM/IQSEC2/NETO2/PTPN9/GNAI1/PRKCE/EZR/NKD2/ARHGAP44/SORBS1/ADAM10/PKDCC/EFCAB7/ITGA3	32
GO:0016079	synaptic vesicle exocytosis	25/2107	96/18888	0.260417	2.33448	4.64479	3.71305e-05	0.00312355	0.00269741	CASK/RAB3A/SCRIB/VAMP2/GIT1/NAPA/CADPS/CPLX2/SNCA/CSPG5/RIMS3/CTBP2/SNAP25/DVL1/SYT7/STX1A/WNT7A/FBXL20/SYT9/DTNBP1/NLGN1/CACNB4/SNPH/RIMS1/FBXO45	25
GO:0006623	protein targeting to vacuole	16/2107	48/18888	0.333333	2.98813	4.88687	3.71914e-05	0.00312355	0.00269741	CLU/SQSTM1/SCARB2/HSPA8/SORT1/RAB7A/AP3M1/PXK/VPS53/LAMP2/ZFYVE16/HGS/VPS13A/VPS8/NCOA4/VPS13C	16
GO:0006887	exocytosis	64/2107	348/18888	0.183908	1.64863	4.32747	3.82202e-05	0.00316537	0.00273352	CDK16/CLASP2/CASK/RAB3A/SCRIB/VAMP2/GNAI2/GIT1/NAPA/SCRN1/CADPS/TRAPPC11/CPLX2/RAB10/SDF4/RAB7A/SNCA/VTI1B/CSPG5/RIMS3/SYNGR1/S100A13/CTBP2/WIPF3/GAB2/SNAP25/SCAMP1/DVL1/EXOC2/SYT7/RAB3IP/STX1A/HGS/SEPTIN4/CDK5R2/WNT7A/FBXL20/SYN2/MICAL1/RABEPK/RAB15/NKD2/RALB/SYT17/SYT9/VAMP7/DTNBP1/NLGN1/SNX4/CACNB4/KCNB1/SNPH/SYNGR2/STAM/ARHGAP44/SEPTIN1/STX17/STXBP5L/BCR/RAB27B/SYT10/SEPTIN2/RIMS1/FBXO45	64
GO:1902905	positive regulation of supramolecular fiber organization	38/2107	175/18888	0.217143	1.94656	4.45757	4.02123e-05	0.00328474	0.0028366	STMN2/SFRP1/CLU/MAP1B/APOE/ARPC2/APP/WASF3/NCKAP1/BIN1/RAC1/GIT1/CD47/NF2/RHOC/BAIAP2/LIMK1/MTSS1/PPM1E/BRK1/NRP1/TGFBR1/CYFIP1/CCN2/CDC42EP1/FLNA/PRKD1/NCK2/PRKCE/NCK1/SNX9/FER/WNT4/PTK2B/WHAMM/FERMT2/NAV3/WDR1	38
GO:0017157	regulation of exocytosis	40/2107	188/18888	0.212766	1.90732	4.4302	4.16926e-05	0.00330328	0.00285262	CLASP2/CASK/RAB3A/VAMP2/GNAI2/GIT1/CADPS/CPLX2/RAB7A/SNCA/CSPG5/RIMS3/GAB2/DVL1/SYT7/STX1A/HGS/SEPTIN4/CDK5R2/WNT7A/FBXL20/MICAL1/RAB15/SYT17/SYT9/VAMP7/DTNBP1/NLGN1/SNX4/CACNB4/KCNB1/STAM/SEPTIN1/STXBP5L/BCR/RAB27B/SYT10/SEPTIN2/RIMS1/FBXO45	40
GO:0032535	regulation of cellular component size	67/2107	370/18888	0.181081	1.62328	4.29037	4.20302e-05	0.00330328	0.00285262	PAK3/TMOD2/NKX6-1/HSP90AA1/MAP1B/SHTN1/APOE/PIK3R2/ARPC2/OLFM1/NCKAP1/MSN/TMSB4X/BIN1/L1CAM/RAC1/CYFIP2/MEGF8/RND2/TMSB15B/BAIAP2/ARPC3/LIMK1/SPTBN1/RTN4R/BLOC1S2/SEMA6C/CLN8/FGF13/BRK1/PREX1/NRP1/TTL/SEMA4F/VAV2/HIP1R/CYFIP1/HAX1/PEX11B/CDH4/SPTBN4/WNT7A/PICALM/ULK2/TNR/TMOD3/CDC42EP1/GNB3/BORCS5/PRKD1/NCK2/PRKCE/ADD3/SPTBN2/EZR/EPS8/RAP1GAP2/SPTAN1/SEMA7A/SLC12A6/NCK1/SNX9/FER/ANO6/PTK2B/MKKS/W…	67
GO:0072655	establishment of protein localization to mitochondrion	29/2107	120/18888	0.241667	2.1664	4.54185	4.21012e-05	0.00330328	0.00285262	HSPD1/HSP90AA1/MTCH1/AKT1/TOMM7/PINK1/SAMM50/TOMM40/PITRM1/TOMM70/PAM16/COX18/BAX/USP36/HSPA4/TOMM22/ARIH2/HAX1/ABLIM3/UBE2L3/FBXO7/PDCD5/TIMM23/GSK3A/FBXW7/BID/HUWE1/TOMM34/BCS1L	29
GO:0051017	actin filament bundle assembly	36/2107	163/18888	0.220859	1.97987	4.452	4.35072e-05	0.00334722	0.00289057	SFRP1/CLASP2/PIK3R2/FSCN1/ACTG1/CUL3/ZEB2/RAC1/CD47/PLS3/ZYX/NF2/RHOC/BAIAP2/LIMK1/MTSS1/PPM1E/HSP90B1/NRP1/TGFBR1/RHPN2/CCN2/FLNA/ARRB1/MICAL1/ACTN1/EZR/F11R/EPS8/WNT4/FAM107A/INPP5K/SORBS1/PTK2B/MKKS/FERMT2	36
GO:0006839	mitochondrial transport	39/2107	182/18888	0.214286	1.92094	4.42367	4.37839e-05	0.00334722	0.00289057	BCL2L1/SLC25A1/HSPD1/HSP90AA1/MTCH1/GHITM/TOMM7/PINK1/SAMM50/TOMM40/SMDT1/SLC25A23/TOMM70/PAM16/CAMK2A/STARD3/MRS2/BAX/BLOC1S2/MCUR1/HSPA4/ALKBH7/TOMM22/HIP1R/SLC25A13/MPC2/PDCD5/TIMM23/MCU/SLC25A33/GSK3A/SLC25A37/BAK1/PSEN2/BID/SLC41A3/SFXN5/BAD/FLVCR1	39
GO:0050890	cognition	60/2107	322/18888	0.186335	1.67039	4.29931	4.45594e-05	0.00336339	0.00290453	CHL1/CCND2/TMOD2/SPECC1/NLGN4X/PRNP/NPTX2/CNR1/ATXN1/CAMK2N1/APOE/PAX6/SLC7A11/APP/SLC1A4/HMGCR/VDAC3/GIT1/MAPK1/ATP8A1/CASP3/NTRK2/TBR1/PPP1R9B/PLCB1/B4GALT2/BTG2/AMFR/NRXN3/CLN8/FGF13/SNAP25/ASIC1/BRINP1/CYFIP1/PTN/SYNGAP1/GRIN2B/PICALM/TNR/ADCY1/CPEB3/GM2A/EIF2AK4/MAN2B1/HIF1A/KAT2A/RCAN1/INSR/ADCY3/PTCHD1/CLSTN2/FAM107A/B2M/ST3GAL4/PDE1B/PAK6/HTT/ITGA3/GABRA5	60
GO:0150115	cell-substrate junction organization	26/2107	103/18888	0.252427	2.26286	4.55379	4.67829e-05	0.00348708	0.00301134	SFRP1/ARHGEF7/GPM6B/CLASP2/ACTG1/LAMTOR2/RAC1/MAP4K4/PTPRA/PTPRK/NRP1/DST/TNS1/CDH11/DUSP22/THY1/ACTN1/RCC2/WNT4/FAM107A/SORBS1/PTK2B/WHAMM/FERMT2/BCR/PRICKLE1	26
GO:0090199	regulation of release of cytochrome c from mitochondria	15/2107	44/18888	0.340909	3.05605	4.83813	4.80795e-05	0.00353948	0.0030566	PSMD10/BCL2L1/CLU/BBC3/AKT1/GHITM/PINK1/BAX/TRIAP1/PDCD5/BAK1/BID/BAD/BMF/FXN	15
GO:0099638	endosome to plasma membrane protein transport	9/2107	18/18888	0.5	4.4822	5.23732	4.98399e-05	0.00362434	0.00312987	NSG1/SCRIB/ATP6AP1/SCARB2/RAB7A/ZDHHC2/GRIP2/GRIP1/ARHGAP44	9
GO:0099173	postsynapse organization	41/2107	196/18888	0.209184	1.87521	4.36431	5.06854e-05	0.00362959	0.00313441	PAK3/NLGN4X/PRNP/CHRDL1/APOE/AKT1/SLC7A11/ACTG1/CTNND2/LRFN4/ABHD17B/CAPRIN1/PTPRD/DNAJA3/BAIAP2/RAC3/CAPRIN2/DVL1/NRP1/ZDHHC2/HIP1R/SYNGAP1/GRIN2B/STAU2/WNT7A/ACTN1/CPNE6/SPTBN2/EZR/LRRTM2/DTNBP1/KIF1A/NLGN1/INSR/ARHGAP44/GRID2/ADAM10/PTK2B/ZNF365/ITGA3/IGF1R	41
GO:0022406	membrane docking	24/2107	92/18888	0.26087	2.33854	4.56034	5.11296e-05	0.00362959	0.00313441	STX16/RAB3A/MSN/AHCYL1/CPLX2/VCAM1/RAB7A/VTI1B/CTBP2/STX7/SNAP25/STX6/EXOC2/RAB3IP/STX1A/PDZD8/PEX26/RABEPK/EZR/RALB/PSEN2/KCNB1/SNPH/STX17	24
GO:0015980	energy derivation by oxidation of organic compounds	62/2107	338/18888	0.183432	1.64436	4.23564	5.42367e-05	0.00380487	0.00328577	PPP1R1A/ATP5F1B/TRAP1/ATP5MG/NDUFA4/COX6A1/AKT1/COX4I1/GHITM/UQCRB/MDH2/PINK1/DGUOK/ATP5F1C/NDUFA7/NDUFB5/GYG2/SLC25A23/NDUFC1/SHMT2/COX7A2/COX5B/NDUFS8/SNCA/NIPSNAP2/SUCLG1/NDUFA6/IRS2/PHKB/SOD2/ACADVL/COX6B1/IDH3A/UQCRC2/SLC25A13/DYRK2/SDHA/SDHB/SDHAF4/IDH1/NDUFB4/GYG1/SLC25A33/GSK3A/CAT/ATP5PD/HIF1A/TIGAR/BID/IDH3B/INSR/OGDHL/PASK/FH/INPP5K/SORBS1/PHKA1/ACADM/FXN/IFNAR1/PGM2/PPP1R3D	62
GO:0070059	intrinsic apoptotic signaling pathway in response to endoplasmic reticulum stress	19/2107	65/18888	0.292308	2.62036	4.63692	5.72873e-05	0.00397214	0.00343023	BCL2L1/BBC3/GRINA/TNFRSF10B/XBP1/DNAJC10/BAG6/BAX/HERPUD1/SELENOK/CHAC1/NCK2/WFS1/TRAF2/BAK1/NCK1/HYOU1/CREB3L1/ERN1	19
GO:0030100	regulation of endocytosis	55/2107	291/18888	0.189003	1.6943	4.2294	6.11007e-05	0.00418785	0.00361651	CLU/APOE/SCRIB/ACTG1/LRPAP1/BIN1/NECAB2/RAC1/TUB/CD47/ABCA2/RAB4A/CALY/SNCA/ANKRD13B/ANKRD13D/APPL1/BICD1/AAK1/PACSIN2/ARRB2/DGKD/CSK/SYT7/SH3GL3/VAC14/ZFYVE16/CNN2/HIP1R/STON2/CBLL1/CCDC32/HPCA/PICALM/PPP3CC/SNAP91/PRKD1/ARRB1/NR1H3/LRSAM1/LRRTM2/SYNJ2BP/DTNBP1/NLGN1/INSR/SNX9/ANO6/SCARB1/ATXN2/B2M/CYBA/VAMP4/PACSIN1/PROM2/BCR	55
GO:0009152	purine ribonucleotide biosynthetic process	43/2107	211/18888	0.203791	1.82687	4.27986	6.41296e-05	0.00434551	0.00375265	ATP5F1B/SLC25A1/ATP6V1A/PDK3/ATP5MG/ADCY2/NME2/NME1/ATP6V0C/ACOT7/TMSB4X/ACSL4/PINK1/ATP5F1C/NDUFA7/NDUFB5/ATIC/NDUFC1/ATP5MC2/ACSBG1/NDUFS8/SNCA/PDHX/ACAT1/NDUFA6/GUCY1B1/NUDT2/SLC25A13/MPC2/SDHA/SDHB/HACD2/NDUFB4/ADCY1/ATP5PD/AK1/ELOVL1/ADCY3/NPPC/PDK1/GUCY1A2/PANK1/PPARA	43
GO:0048488	synaptic vesicle endocytosis	20/2107	71/18888	0.28169	2.52518	4.56227	6.60002e-05	0.00442201	0.00381872	NLGN4X/CANX/SCRIB/ACTG1/BIN1/VAMP2/SNCA/SYT7/SH3GL3/STON2/STX1A/PICALM/PPP3CC/SNAP91/NLGN1/SNX9/AMPH/VAMP4/PACSIN1/RAB27B	20
GO:1901653	cellular response to peptide	67/2107	376/18888	0.178191	1.59738	4.14594	6.99182e-05	0.00460894	0.00398014	SYAP1/ATP1A3/PRNP/NKX6-1/MAP1B/PIK3R2/AKT1/PAX6/APP/AHCYL1/PRKCA/VAMP2/FAT1/GNAI2/CACNA2D1/MAPK1/CHMP5/XBP1/ASS1/VCAM1/CAMK2A/RAB10/PTPRA/BAIAP2/PPP1R9B/CTSD/BCAR1/PLCB1/PIP4K2B/APPL1/IRS2/ARHGEF2/BACE1/CSK/PRKCI/RHOQ/CYFIP1/GRB10/KLF3/RANGAP1/PRKD1/DENND4C/PCK2/SLC25A33/GSK3A/HDAC9/HDAC5/HSF1/INSR/PTPRE/NCK1/RIPK2/FER/STAT3/GDF15/INHBB/INPP5K/INSIG1/SORBS1/TBC1D4/MYO1C/CPEB1/PIP4K2A/NFKB1/C2CD5/…	67
GO:0006457	protein folding	45/2107	225/18888	0.2	1.79288	4.23949	7.0336e-05	0.00460894	0.00398014	HSPD1/CLU/HSP90AA1/TRAP1/CANX/AHSA1/DNAJB1/PPIL3/PRDX4/NUDC/HSPA8/CCT4/DNAJC10/CRTAP/DNAJA3/UGGT1/LTBP4/PPID/DNAJC3/HSPA4/HSP90B1/ST13/ZPR1/ERO1B/HSPA14/SACS/DNAJB5/CRYAB/PDCD5/BAG1/TAPBP/UNC45A/WFS1/PDIA4/SDF2L1/NUDCD3/TBCE/HSPA4L/DNAJB6/HSPH1/NPPC/HYOU1/B2M/DNAJB14/MKKS	45
GO:0006898	receptor-mediated endocytosis	50/2107	259/18888	0.19305	1.73058	4.19496	7.44371e-05	0.00482466	0.00416643	CLU/LRP2/CANX/LRP3/APOE/SCRIB/LRPAP1/CACNG7/CACNG4/NECAB2/SCARB2/GRK2/RAC1/CLTB/ABCA2/AP2A2/CTSL/CALY/SNCA/ANKRD13B/ANKRD13D/BICD1/AAK1/ARRB2/SNAP25/DGKD/SH3GL3/VAC14/CD81/HIP1R/STON2/CCDC32/HPCA/HGS/PICALM/SNAP91/ARRB1/RAMP1/RABEPK/EZR/RALB/LRRTM2/LDLRAD3/DTNBP1/INSR/SNX9/ATXN2/B2M/ITCH/MICALL1	50
GO:0000423	mitophagy	18/2107	61/18888	0.295082	2.64523	4.56044	7.77419e-05	0.00498467	0.00430462	MAP1LC3B/ATG4A/SQSTM1/OPTN/TOMM7/PINK1/USP36/AMBRA1/FBXO7/GSK3A/ATG4C/HIF1A/TIGAR/FBXW7/HUWE1/VPS13C/HTT/RETREG1	18
GO:0030032	lamellipodium assembly	20/2107	72/18888	0.277778	2.49011	4.48876	8.1906e-05	0.0051958	0.00448695	ARHGEF7/HSP90AA1/ARPC2/FSCN1/WASF3/NCKAP1/AKIRIN1/ARHGEF4/RAC1/PTPRO/BRK1/VAV2/CYFIP1/ABLIM3/NCK2/ABLIM2/NCK1/FER/ABLIM1/WHAMM	20
GO:0010821	regulation of mitochondrion organization	33/2107	149/18888	0.221477	1.9854	4.27897	8.3864e-05	0.00526401	0.00454585	PSMD10/BCL2L1/CLU/BBC3/SQSTM1/AKT1/GHITM/VAT1/PINK1/BAX/USP36/TRIAP1/HIP1R/AMBRA1/HAX1/INF2/FBXO7/PDCD5/MCU/ENDOG/GSK3A/BAK1/HIF1A/TIGAR/FBXW7/BID/HUWE1/BAD/VPS13C/BMF/ZDHHC6/FXN/HTT	33
GO:0030900	forebrain development	71/2107	408/18888	0.17402	1.55998	4.05189	9.30285e-05	0.00573112	0.00494923	ATP2B4/DLX2/LRP2/FEZ1/DNAJB1/PAX6/SLC7A11/APP/MDGA1/ARX/DCLK1/ERBB4/ATP1B2/SLC1A2/YWHAE/ID2/ATF5/DLX5/TUBB2A/MBOAT7/ATIC/RFX4/NF2/CASP3/NTRK2/TBR1/PPP1R9B/PLCB1/SALL1/BAX/BTG2/PGAP1/RTN4R/TOX/RAC3/FGF13/NRP1/COL3A1/WDR89/ROBO2/CDK5R2/BTBD3/WNT7A/TNR/FLNA/PEX5/KCNC2/DLX1/RRM1/NRG3/HERC1/HIF1A/IGF2BP1/KAT2A/PRKG1/ASCL1/SEMA7A/SLC4A10/PTCHD1/WNT4/B2M/TWSG1/PHLPP2/INHBB/KCNA3/SOX3/NPY/MKKS/KCNA2/FBXO…	71
GO:0008637	apoptotic mitochondrial changes	26/2107	107/18888	0.242991	2.17827	4.33093	9.32281e-05	0.00573112	0.00494923	PSMD10/BCL2L1/HSPD1/CLU/BBC3/AKT1/GHITM/ERBB4/PINK1/CAMK2A/BAX/BLOC1S2/SOD2/TRIAP1/HIP1R/PPP2CB/PDCD5/GSK3A/BAK1/GGCT/BID/BAD/IFI6/GCLM/BMF/FXN	26
GO:0021537	telencephalon development	52/2107	275/18888	0.189091	1.69509	4.11436	9.44877e-05	0.00573937	0.00495635	ATP2B4/DLX2/FEZ1/PAX6/SLC7A11/MDGA1/ARX/ERBB4/ATP1B2/SLC1A2/YWHAE/ID2/ATF5/DLX5/TUBB2A/MBOAT7/ATIC/RFX4/NF2/CASP3/NTRK2/TBR1/PPP1R9B/PLCB1/SALL1/BAX/BTG2/RTN4R/FGF13/COL3A1/WDR89/ROBO2/CDK5R2/BTBD3/TNR/FLNA/PEX5/DLX1/NRG3/HERC1/HIF1A/IGF2BP1/KAT2A/ASCL1/SEMA7A/PHLPP2/KCNA3/NPY/MKKS/KCNA2/FBXO45/IGF1R	52
GO:0140058	neuron projection arborization	12/2107	32/18888	0.375	3.36165	4.73774	9.52872e-05	0.00573937	0.00495635	LRP2/DVL1/NRP1/PTN/GRIP1/IGF2BP1/NLGN1/MOV10/NTNG1/SSNA1/ZNF365/PAK6	12
GO:0007416	synapse assembly	42/2107	208/18888	0.201923	1.81012	4.16291	9.63939e-05	0.00574797	0.00496378	SPOCK2/NLGN4X/GPM6A/EFNB3/CLSTN3/GABRA2/MAP1B/APP/MDGA1/DNER/ERBB4/LRFN4/PTPRD/FLRT3/NTRK2/GABRB3/SNCA/FGF13/SNAP25/DVL1/ZDHHC2/ROBO2/STAU2/WNT7A/SYNDIG1/THBS2/NRG3/SPTBN2/LRRTM2/PLXND1/GABRA4/NLGN1/GABRA3/ST8SIA2/CLSTN2/GRID2/PCDHB3/PTK2B/LRRTM3/PCDHB4/FBXO45/GABRA5	42
GO:0036490	regulation of translation in response to endoplasmic reticulum stress	7/2107	12/18888	0.583333	5.22924	5.19281	0.000101318	0.0059818	0.00516571	SESN2/EIF2S1/DDX3X/DNAJC3/NCK2/EIF2AK4/NCK1	7
GO:0007044	cell-substrate junction assembly	24/2107	96/18888	0.25	2.2411	4.31977	0.000106207	0.00616102	0.00532048	SFRP1/ARHGEF7/GPM6B/CLASP2/ACTG1/RAC1/MAP4K4/PTPRA/PTPRK/NRP1/DST/TNS1/CDH11/DUSP22/THY1/ACTN1/RCC2/WNT4/FAM107A/SORBS1/PTK2B/WHAMM/FERMT2/BCR	24
GO:0050803	regulation of synapse structure or activity	48/2107	249/18888	0.192771	1.72808	4.09799	0.000106421	0.00616102	0.00532048	PAK3/GPM6A/PRNP/EFNB3/CLSTN3/CAMKV/RHOB/APOE/AKT1/SLC7A11/APP/MDGA1/LRFN4/ABHD17B/CAPRIN1/PTPRD/FLRT3/NTRK2/BAIAP2/SNCA/PTPRO/CTNNA2/PCDH8/CAPRIN2/MAPK14/SNAP25/DVL1/CYFIP1/SYNGAP1/ROBO2/GRIN2B/STAU2/WNT7A/SYNDIG1/THBS2/PLXNC1/CAMK1/LRRTM2/DTNBP1/KIF1A/NLGN1/ARHGAP44/ST8SIA2/CLSTN2/GRID2/ADAM10/PTK2B/LRRTM3	48
GO:0050807	regulation of synapse organization	47/2107	243/18888	0.193416	1.73386	4.07979	0.000114945	0.0065278	0.00563722	PAK3/GPM6A/PRNP/EFNB3/CLSTN3/CAMKV/RHOB/APOE/AKT1/SLC7A11/APP/MDGA1/LRFN4/ABHD17B/CAPRIN1/PTPRD/FLRT3/NTRK2/BAIAP2/SNCA/PTPRO/CTNNA2/PCDH8/CAPRIN2/MAPK14/SNAP25/DVL1/CYFIP1/ROBO2/GRIN2B/STAU2/WNT7A/SYNDIG1/THBS2/PLXNC1/CAMK1/LRRTM2/DTNBP1/KIF1A/NLGN1/ARHGAP44/ST8SIA2/CLSTN2/GRID2/ADAM10/PTK2B/LRRTM3	47
GO:0060560	developmental growth involved in morphogenesis	47/2107	243/18888	0.193416	1.73386	4.07979	0.000114945	0.0065278	0.00563722	USP9X/SFRP1/CPNE1/NKX6-1/MAP1B/RNF157/SHTN1/SPAG9/APOE/APP/DCLK1/OLFM1/CACNG7/L1CAM/CYFIP2/MEGF8/RND2/FLRT3/PLAA/SLC23A2/LIMK1/SALL1/RTN4R/SEMA6C/FGF13/DVL1/NRP1/TTL/SEMA4F/CYFIP1/CDH4/SOX9/ULK2/TNR/CPNE6/EIF2AK4/SYT17/PRKG1/ALCAM/SEMA7A/ST8SIA2/SSNA1/NRN1/PAK6/RIMS1/PRICKLE1/MESP1	47
GO:0048041	focal adhesion assembly	22/2107	85/18888	0.258824	2.3202	4.32255	0.000117356	0.00660184	0.00570116	SFRP1/ARHGEF7/GPM6B/CLASP2/ACTG1/RAC1/MAP4K4/PTPRA/PTPRK/NRP1/CDH11/DUSP22/THY1/ACTN1/RCC2/WNT4/FAM107A/SORBS1/PTK2B/WHAMM/FERMT2/BCR	22
GO:0097193	intrinsic apoptotic signaling pathway	58/2107	319/18888	0.181818	1.62989	4.02042	0.000119154	0.00664035	0.00573442	DDIT4/BCL2L1/CLU/CDKN1A/TRAP1/BBC3/GRINA/CDKN2D/TNFRSF10B/AKT1/PINK1/CUL3/AEN/XBP1/DNAJC10/DDX3X/PRKRA/SHISA5/CASP3/BAG6/BAX/HERPUD1/CASP9/ARHGEF2/SOD2/TRIAP1/CUL1/SELENOK/DYRK2/SEPTIN4/NOC2L/CHAC1/PHLDA3/FBXO7/MYC/STK24/NCK2/WFS1/TRAF2/BAK1/HIF1A/FBXW7/WWOX/BID/SGPP1/NCK1/EDA2R/SGMS1/ATAD5/PYCR1/HYOU1/BAD/IFI6/TAF9B/CREB3L1/ERN1/PDK1/CRIP1	58
GO:0006470	protein dephosphorylation	42/2107	210/18888	0.2	1.79288	4.09409	0.000120543	0.00665554	0.00574753	ARPP19/CALM2/PINK1/YWHAE/PTPRD/PTPRU/PPP4R4/PTPRA/NSMF/PTPRO/PPP1R7/ANKLE2/PPM1E/PPP6R3/CRY2/HSP90B1/PTPRK/AMBRA1/SBF1/DUSP8/PPP2CB/MTMR6/PPP3CC/PTPN5/NUAK1/BTRC/PTPN9/NCK2/DUSP22/PPM1D/PDGFRB/PDP2/PTPRM/PTPRE/PPM1H/NCK1/PPP1R16B/PTPRG/PHLPP2/UBASH3B/IKBKB/HTT	42
GO:0097581	lamellipodium organization	23/2107	91/18888	0.252747	2.26573	4.28866	0.000122728	0.00669451	0.00578118	ARHGEF7/ENPP2/HSP90AA1/MTSS2/ARPC2/FSCN1/WASF3/NCKAP1/AKIRIN1/ARHGEF4/RAC1/PTPRO/BRK1/VAV2/CYFIP1/ABLIM3/NCK2/PDPN/ABLIM2/NCK1/FER/ABLIM1/WHAMM	23
GO:0007034	vacuolar transport	36/2107	171/18888	0.210526	1.88724	4.12978	0.000123494	0.00669451	0.00578118	CLU/RHOB/SQSTM1/CACNG7/PINK1/CACNG4/BIN1/SCARB2/HSPA8/CHMP5/MGRN1/SORT1/GPRASP1/RAB7A/TMEM50B/AP3M1/VTI1B/CLEC16A/PXK/VPS53/VPS36/LAMP2/ZFYVE16/HGS/VPS13A/VPS8/VTA1/VAMP7/NCOA4/VPS52/STAM/TMEM106B/HMGXB4/HOOK1/VPS13C/HOOK2	36
GO:0035966	response to topologically incorrect protein	33/2107	152/18888	0.217105	1.94622	4.15031	0.000125844	0.00676041	0.0058381	HSPD1/CLU/HSP90AA1/PARP6/OPTN/DNAJB1/HSPA8/CUL3/EIF2S1/XBP1/DNAJC10/BAX/AMFR/HERPUD1/DNAJC3/HSPA4/KBTBD6/DNAJB5/CHAC1/NCK2/CREB3L2/CTH/WFS1/BAK1/CREBRF/HSPA4L/CREB3L4/HSF1/NCK1/HSPH1/DNAJB14/CREB3L1/ERN1	33
GO:0006979	response to oxidative stress	69/2107	398/18888	0.173367	1.55413	3.95904	0.000130223	0.00693321	0.00598732	HM13/PRNP/MAP1LC3A/TRAP1/NME2/RHOB/SIRT2/APOE/AKT1/SLC7A11/APP/PRDX4/PINK1/BANF1/ADCYAP1R1/SESN2/MAPK1/EIF2S1/JUN/MAPK8/PRKRA/CASP3/SLC23A2/NDUFS8/CAPN2/SNCA/TP53INP1/WRN/NDUFA6/SESN1/RWDD1/PTPRK/SOD2/PRDX1/SELENOK/NUDT2/PPP2CB/ATOX1/STAU2/STAU1/CRYAB/IDH1/STK24/LIAS/PRKD1/NDUFB4/PEX5/CAT/BAK1/PRDX6/HIF1A/KEAP1/PLEKHA1/HSF1/RCAN1/PEX14/NCOA7/HMOX2/PLK3/SCARA3/FER/PYCR1/THG1L/PTK2B/PPARGC1B/ERN1/G…	69
GO:0006622	protein targeting to lysosome	12/2107	33/18888	0.363636	3.25978	4.60379	0.000134621	0.00710394	0.00613475	CLU/SCARB2/HSPA8/SORT1/RAB7A/AP3M1/PXK/VPS53/LAMP2/ZFYVE16/HGS/NCOA4	12
GO:0006650	glycerophospholipid metabolic process	56/2107	307/18888	0.18241	1.6352	3.97604	0.000141624	0.00740793	0.00639727	ENPP2/PIK3R2/FAR1/PCYT1B/LPCAT1/MBOAT7/PI4KA/EFR3B/PTDSS1/CAPN2/PLCB1/UVRAG/PIP4K2B/PGAP1/FABP5/PEMT/PIP4P1/LPCAT4/ABCA3/DGKD/PITPNM1/VAC14/CHPT1/SELENOI/INPP5B/MTMR6/INPP5A/ABHD5/GDPD1/PDGFA/NR1H3/PIGZ/ABHD6/PRDX6/PDGFRB/SERINC5/INPP4A/DGKE/PITPNM2/PCYT2/PIGA/SCARB1/DGKZ/PLCD1/DHRS7B/INPP5K/GDE1/SOCS7/PLCB3/PIP5KL1/OSBPL5/PIGT/PIP4K2A/INPP1/NAPEPLD/PITPNM3	56
GO:0007612	learning	33/2107	153/18888	0.215686	1.9335	4.10807	0.000143554	0.0074436	0.00642807	SPECC1/NLGN4X/NPTX2/ATXN1/SLC7A11/APP/HMGCR/VDAC3/GIT1/ATP8A1/NTRK2/TBR1/PPP1R9B/PLCB1/B4GALT2/BTG2/NRXN3/CLN8/FGF13/SNAP25/ASIC1/PTN/SYNGAP1/TNR/EIF2AK4/HIF1A/INSR/ADCY3/CLSTN2/PDE1B/PAK6/HTT/GABRA5	33
GO:0045806	negative regulation of endocytosis	20/2107	75/18888	0.266667	2.39051	4.27543	0.000151828	0.00780474	0.00673994	LRPAP1/NECAB2/RAC1/CD47/ABCA2/ANKRD13B/ANKRD13D/APPL1/PACSIN2/CSK/SH3GL3/CNN2/PICALM/PRKD1/NR1H3/LRSAM1/LRRTM2/ATXN2/PACSIN1/PROM2	20
GO:0051962	positive regulation of nervous system development	54/2107	294/18888	0.183673	1.64652	3.95892	0.000153768	0.00783689	0.00676771	NKX6-2/NKX6-1/CLSTN3/MAP1B/LRP2/SHTN1/SOX8/PARP6/NRDC/PAX6/NKX2-2/SLC7A5/BIN1/METRN/L1CAM/CAPRIN1/ID2/MEGF8/RND2/PTPRD/FLRT3/NTRK2/BAIAP2/LIMK1/MAP2K1/CAPRIN2/ANKRD27/NRP1/SERPINE2/PRKCI/CYFIP1/PTN/CDH4/ROBO2/STAU2/RASSF10/WNT7A/SYNDIG1/THBS2/PLXNC1/HIF1A/LRRTM2/PLXND1/SS18L1/TENM4/ASCL1/NLGN1/SEMA7A/ST8SIA2/CLSTN2/GRID2/TIAM2/LRRTM3/ZNF365	54
GO:0022604	regulation of cell morphogenesis	47/2107	246/18888	0.191057	1.71271	3.98694	0.000155539	0.00785999	0.00678766	ARHGEF7/BRWD1/ENPP2/RNF157/SPAG9/PARP6/WASF3/MSN/CACNG7/RAC1/CAPRIN1/PTPRD/PALM/EPB41L3/NF2/PLAA/BAIAP2/SLC23A2/RAC3/CAPRIN2/ANKRD27/DVL1/AGO4/RHOQ/CYFIP1/STAU2/CDC42EP1/PARVA/PDZD8/GRIP1/PDPN/CPNE6/EZR/F11R/PLXNC1/EPS8/PLXND1/SYT17/COCH/SS18L1/MOV10/NTNG1/PTK2B/FERMT2/RIMS1/WDR1/FMNL3	47
GO:0010563	negative regulation of phosphorus metabolic process	66/2107	379/18888	0.174142	1.56108	3.90985	0.000158069	0.00792073	0.00684012	DDIT4/GNAQ/UCHL1/SFRP1/PRNP/CDKN1A/CADM1/CAMK2N1/CDKN2D/SPAG9/SIRT2/APOE/HIPK3/AKT1/ARPP19/PAX6/CALM2/YWHAE/GIT1/LPCAT1/CAMK2N2/DNAJC10/CIB1/NF2/PPP4R4/PRKAR2A/SNCA/PKN1/BAX/PTPRO/DNAJC3/ANKLE2/PPM1E/IRS2/CRY2/ARRB2/DVL1/MEN1/RASSF2/PAQR3/GRB10/NTRK3/DYNLL1/INSM1/PDGFA/NCK2/GSK3A/DUSP22/THY1/MICAL1/BAK1/TIGAR/PRKG1/DTNBP1/CEP85/NCK1/STAT3/PPP1R16B/UBASH3B/INPP5K/PIP5KL1/IPO5/GPD1L/PPARA/IKBKB/TRI…	66
GO:0032869	cellular response to insulin stimulus	41/2107	206/18888	0.199029	1.78418	4.00997	0.000161082	0.00800445	0.00691241	SYAP1/PIK3R2/AKT1/PAX6/VAMP2/GNAI2/MAPK1/XBP1/RAB10/PTPRA/BAIAP2/CTSD/BCAR1/PIP4K2B/APPL1/IRS2/PRKCI/RHOQ/CYFIP1/GRB10/DENND4C/PCK2/SLC25A33/GSK3A/HDAC9/HDAC5/INSR/PTPRE/NCK1/FER/INHBB/INPP5K/INSIG1/SORBS1/TBC1D4/MYO1C/CPEB1/PIP4K2A/C2CD5/NCL/IGF1R	41
GO:0007214	gamma-aminobutyric acid signaling pathway	11/2107	29/18888	0.37931	3.40029	4.58362	0.00016527	0.00814465	0.00703348	GABRA2/GNAI2/GABBR1/GABRB3/GABRB1/PLCL1/GABBR2/GABRA4/CACNB4/GABRA3/GABRA5	11
GO:0034762	regulation of transmembrane transport	81/2107	489/18888	0.165644	1.4849	3.8496	0.000171354	0.00837527	0.00723264	ATP1B1/PRNP/ATP2B4/OAZ1/NDUFA4/PEA15/PLP1/AKT1/ARPP19/APP/SLC7A5/CALM2/SLC6A9/TMSB4X/AHCYL1/CACNG7/WNK2/ATP1B2/CACNG4/BIN1/VAMP2/SLC1A2/ADCYAP1R1/GNB2/YWHAE/CACNA2D1/FXYD6/MINK1/SNCA/BAX/FABP5/APPL1/NIPSNAP2/IRS2/FGF14/FGF13/MAPK14/CAMK2D/PRKCI/RHOQ/GRB10/SLC25A27/CACNB2/HPCA/GRIN2B/MEF2A/PPP3CC/FLNA/PRKD1/KCNJ3/KCNC2/GSK3A/SHISA9/PRKCE/THY1/BAK1/ARL6IP1/PSEN2/RGS7/NLGN1/CACNB4/INSR/KCNIP1/ANO6/K…	81
GO:0007006	mitochondrial membrane organization	27/2107	117/18888	0.230769	2.06871	4.10878	0.000174976	0.0084828	0.0073255	BCL2L1/HSP90AA1/MTCH1/GHITM/TOMM7/PINK1/SAMM50/TOMM40/TOMM70/CAMK2A/COX18/SNCA/BAX/BLOC1S2/HSPA4/ALKBH7/CLN8/TOMM22/HIP1R/PDCD5/PEX5/GSK3A/BAK1/BID/APOO/BAD/BCS1L	27
GO:1905477	positive regulation of protein localization to membrane	25/2107	105/18888	0.238095	2.13438	4.13025	0.000178112	0.00856515	0.00739662	PRNP/ATP2B4/SQSTM1/AKT1/NECAB2/CIB1/PPP1R9B/SPTBN1/SLC5A3/ZDHHC2/PRKCI/CD81/HPCA/PDCD5/PTPN9/PRKCE/EZR/NKD2/KCNB1/MTCL1/SORBS1/MYO1C/C2CD5/EFCAB7/ITGA3	25
GO:0051960	regulation of nervous system development	78/2107	468/18888	0.166667	1.49407	3.83503	0.000183823	0.0087691	0.00757274	NKX6-2/NKX6-1/EFNB3/CLSTN3/DLX2/DPYSL5/MAP1B/LRP2/SHTN1/SOX8/PARP6/NRDC/SIRT2/AKT1/PAX6/NKX2-2/SLC7A5/WASF3/CTNNA1/BIN1/METRN/L1CAM/CAPRIN1/ID2/MEGF8/RND2/PTPRD/FLRT3/NF2/NTRK2/BAIAP2/LIMK1/MAP2K1/BTG2/TNFRSF21/RTN4R/SEMA6C/CAPRIN2/FGF13/ANKRD27/NRP1/ZPR1/SERPINE2/PRKCI/BRINP1/SEMA4F/CYFIP1/PTN/HEY1/SYNGAP1/CDH4/GORASP1/ROBO2/STAU2/RASSF10/WNT7A/ULK2/TNR/SYNDIG1/THBS2/DLX1/THY1/PLXNC1/HIF1A/LRRTM…	78
GO:0030833	regulation of actin filament polymerization	30/2107	136/18888	0.220588	1.97744	4.05361	0.000185944	0.00878326	0.00758497	PAK3/TMOD2/PIK3R2/ARPC2/NCKAP1/TMSB4X/BIN1/CYFIP2/TMSB15B/BAIAP2/ARPC3/SPTBN1/PREX1/HIP1R/CYFIP1/HAX1/SPTBN4/TMOD3/CDC42EP1/NCK2/PRKCE/ADD3/SPTBN2/EPS8/SPTAN1/NCK1/SNX9/FER/PTK2B/MKKS	30
GO:0090151	establishment of protein localization to mitochondrial membrane	12/2107	34/18888	0.352941	3.16391	4.47488	0.000187066	0.00878326	0.00758497	HSP90AA1/MTCH1/TOMM7/SAMM50/TOMM40/TOMM70/COX18/BAX/HSPA4/TOMM22/PDCD5/BCS1L	12
GO:0098930	axonal transport	18/2107	65/18888	0.276923	2.48245	4.24226	0.000190912	0.00889382	0.00768045	UCHL1/FEZ1/DYNC1H1/KIF1B/ARL8A/MAPK8IP3/AP3M1/CALY/BLOC1S2/KIF3A/DST/BORCS5/HSBP1/HIF1A/DTNBP1/KIF1A/TERF2/RAB27B	18
GO:0031345	negative regulation of cell projection organization	40/2107	201/18888	0.199005	1.78396	3.95938	0.000192857	0.00891477	0.00769853	STMN2/PRNP/EFNB3/DPYSL5/APOE/AKT1/SPOCK1/DGUOK/NEO1/CIB1/PTPRO/GLCE/RTN4R/SEMA6C/FGF13/NRP1/SEMA4F/RAB3IP/PAQR3/SYNGAP1/GORASP1/GRIN2B/ULK2/TNR/FLNA/PTPN9/GSK3A/THY1/TBC1D30/DTNBP1/NLGN1/SEMA7A/ARHGAP44/KREMEN1/PTPRG/B2M/MINAR1/ZNF365/ZNF296/ITGA3	40
GO:0008277	regulation of G protein-coupled receptor signaling pathway	32/2107	149/18888	0.214765	1.92524	4.01772	0.000195165	0.00895207	0.00773075	TMOD2/ARRDC3/ATP2B4/GNG4/NECAB2/PRKCA/GRK2/GNAI2/TUB/GIT1/MGRN1/CAMK2A/GPRASP1/PPP1R9B/PLCB1/SNCA/BICD1/ARRB2/GPR27/HOMER2/INPP5A/GRK6/ARRB1/GSK3A/ABHD6/RAMP1/HIF1A/RGS7/USP20/PDE4A/RGS11/RGS16	32
GO:0061795	Golgi lumen acidification	7/2107	13/18888	0.538462	4.82699	4.89091	0.000198344	0.00902843	0.00779669	ATP6V1A/ATP6V0C/ATP6AP1/ATP6AP2/ATP6V1F/ATP6V0B/ATP6V1H	7
GO:0071375	cellular response to peptide hormone stimulus	56/2107	311/18888	0.180064	1.61417	3.86977	0.000200657	0.00906454	0.00782787	SYAP1/NKX6-1/MAP1B/PIK3R2/AKT1/PAX6/AHCYL1/PRKCA/VAMP2/FAT1/GNAI2/MAPK1/XBP1/ASS1/CAMK2A/RAB10/PTPRA/BAIAP2/CTSD/BCAR1/PLCB1/PIP4K2B/APPL1/IRS2/CSK/PRKCI/RHOQ/CYFIP1/GRB10/RANGAP1/PRKD1/DENND4C/PCK2/SLC25A33/GSK3A/HDAC9/HDAC5/HSF1/INSR/PTPRE/NCK1/FER/STAT3/GDF15/INHBB/INPP5K/INSIG1/SORBS1/TBC1D4/MYO1C/CPEB1/PIP4K2A/NFKB1/C2CD5/NCL/IGF1R	56
GO:0072665	protein localization to vacuole	22/2107	88/18888	0.25	2.2411	4.13499	0.000202471	0.00907771	0.00783924	CLU/SQSTM1/AKT1/CACNG7/CACNG4/SCARB2/HSPA8/SORT1/RAB7A/AP3M1/PXK/VPS53/VPS36/LAMP2/ZFYVE16/CD81/HGS/VPS13A/VPS8/NCOA4/STAM/VPS13C	22
GO:0006626	protein targeting to mitochondrion	25/2107	106/18888	0.235849	2.11425	4.07632	0.000208755	0.00928962	0.00802224	HSPD1/HSP90AA1/MTCH1/TOMM7/PINK1/SAMM50/TOMM40/PITRM1/TOMM70/PAM16/USP36/HSPA4/TOMM22/ARIH2/HAX1/ABLIM3/UBE2L3/FBXO7/PDCD5/TIMM23/GSK3A/FBXW7/BID/HUWE1/TOMM34	25
GO:0071806	protein transmembrane transport	18/2107	66/18888	0.272727	2.44484	4.16642	0.00023546	0.0104004	0.00898146	USP9X/EDNRB/HSPD1/TOMM7/SEC61A2/TOMM40/TOMM70/PAM16/TOMM22/PEX6/TIMM23/PEX5/PEX26/TRAM1L1/PEX14/SEC61G/BCR/C2CD5	18
GO:0006986	response to unfolded protein	30/2107	138/18888	0.217391	1.94878	3.96379	0.000243708	0.0106855	0.00922771	HSPD1/HSP90AA1/PARP6/OPTN/DNAJB1/HSPA8/EIF2S1/XBP1/DNAJC10/BAX/AMFR/HERPUD1/DNAJC3/HSPA4/KBTBD6/DNAJB5/CHAC1/NCK2/CREB3L2/CTH/WFS1/BAK1/CREBRF/HSPA4L/CREB3L4/HSF1/NCK1/HSPH1/CREB3L1/ERN1	30
GO:0043523	regulation of neuron apoptotic process	46/2107	244/18888	0.188525	1.69001	3.84402	0.000249363	0.0108537	0.0093729	CHL1/BCL2L1/CLU/PRNP/PINK1/NRBP2/CDC34/FAIM2/CASP3/NTRK2/SNCA/BAX/NSMF/BTG2/CASP9/SIGMAR1/CLN8/BACE1/SOD2/NRP1/ZPR1/PRKCI/AMBRA1/SLC25A27/SYNGAP1/FBXO7/SRPK2/DLX1/GSK3A/WFS1/HIF1A/THAP11/PLXND1/FBXW7/ASCL1/KCNB1/PYCR1/NPPC/ST8SIA2/GRID2/HYOU1/UNC5B/PTK2B/GCLM/ADAM8/RETREG1	46
GO:0045936	negative regulation of phosphate metabolic process	65/2107	378/18888	0.171958	1.5415	3.76829	0.000254388	0.0109921	0.00949248	DDIT4/GNAQ/UCHL1/SFRP1/PRNP/CDKN1A/CADM1/CAMK2N1/CDKN2D/SPAG9/SIRT2/APOE/HIPK3/AKT1/ARPP19/PAX6/CALM2/YWHAE/GIT1/LPCAT1/CAMK2N2/DNAJC10/CIB1/NF2/PPP4R4/PRKAR2A/SNCA/PKN1/BAX/PTPRO/DNAJC3/ANKLE2/PPM1E/IRS2/CRY2/ARRB2/DVL1/MEN1/RASSF2/PAQR3/GRB10/NTRK3/DYNLL1/INSM1/PDGFA/NCK2/DUSP22/THY1/MICAL1/BAK1/TIGAR/PRKG1/DTNBP1/CEP85/NCK1/STAT3/PPP1R16B/UBASH3B/INPP5K/PIP5KL1/IPO5/GPD1L/PPARA/IKBKB/TRIB1	65
GO:0016050	vesicle organization	64/2107	371/18888	0.172507	1.54642	3.76646	0.000258232	0.011078	0.00956662	AP1S2/ATP6V1A/LAPTM4B/STX16/TRAPPC4/SQSTM1/RAB3A/APOE/ATP6V0C/ATP6AP1/SCARB2/VAMP2/ATP6V1G1/CUL3/ZEB2/CHMP5/CSNK1D/TRAPPC11/SORT1/CPLX2/SHROOM2/RAB7A/AP3M1/UVRAG/SNCA/VTI1B/PIP4K2B/BLOC1S2/ATP6AP2/STX7/SNAP25/STX6/ANKRD27/VPS36/SYT7/SERPINE2/ZFYVE16/PRKCI/ATP6V1F/SNX10/SEPTIN8/STX1A/HGS/PICALM/VPS8/VTA1/SNAP91/CC2D1A/NKD2/ATP6V0B/SYT9/VAMP7/DTNBP1/PLEKHA3/STAM/STX17/HOOK1/VAMP4/INSIG1/TBC1D4/HOOK…	64
GO:0051495	positive regulation of cytoskeleton organization	37/2107	184/18888	0.201087	1.80262	3.87667	0.000265341	0.0113016	0.00975976	STMN2/SFRP1/MAP1B/ARPC2/WASF3/DYNC1H1/NCKAP1/BIN1/RAC1/GIT1/CD47/NF2/RHOC/BAIAP2/LIMK1/MTSS1/PPM1E/BRK1/NRP1/TGFBR1/CYFIP1/CCN2/CDC42EP1/FLNA/PRKD1/NCK2/PRKCE/ADD3/NCK1/SNX9/FER/WNT4/PTK2B/WHAMM/FERMT2/NAV3/WDR1	37
GO:0003310	pancreatic A cell differentiation	6/2107	10/18888	0.6	5.37864	4.90757	0.000269659	0.0114041	0.00984825	NKX6-2/NKX6-1/PAX6/NKX2-2/INSM1/ONECUT1	6
GO:0002028	regulation of sodium ion transport	21/2107	84/18888	0.25	2.2411	4.03949	0.000279849	0.0117517	0.0101484	ATP1B1/ATP2B4/CNTN1/AKT1/AHCYL1/WNK2/ATP1B2/FXYD6/PER1/NKAIN4/FGF14/FGF13/CAMK2D/SERPINE2/SPTBN4/ATP1A1/PRKCE/SNTA1/HECW1/HECW2/GPD1L	21
GO:0060291	long-term synaptic potentiation	25/2107	108/18888	0.231481	2.07509	3.97023	0.00028435	0.0117749	0.0101684	NSG1/PRNP/SQSTM1/APOE/CALB2/APP/HMGCR/VAMP2/MAPK1/NTRK2/SNCA/SNAP25/SERPINE2/ZDHHC2/PTN/GRIN2B/PDE9A/TNR/STAU1/ADCY1/EIF2AK4/LRRTM2/FAM107A/PTK2B/SCGN	25
GO:1903076	regulation of protein localization to plasma membrane	25/2107	108/18888	0.231481	2.07509	3.97023	0.00028435	0.0117749	0.0101684	BCL2L1/PRNP/ATP2B4/SQSTM1/PIK3R2/AKT1/CIB1/PPP1R9B/SPTBN1/VTI1B/APPL1/STX7/CSK/ZDHHC2/PRKCI/RHOQ/PICALM/PTPN9/PRKCE/EZR/NKD2/ARHGAP44/SORBS1/PKDCC/ITGA3	25
GO:0042982	amyloid precursor protein metabolic process	23/2107	96/18888	0.239583	2.14772	3.99476	0.00028829	0.0118557	0.0102382	NSG1/CLU/SPON1/PRNP/APOE/BIN1/NECAB2/RTN1/ABCA2/CASP3/NTRK2/ITM2B/BACE1/NECAB3/DHCR24/PICALM/SOAT1/GSK3A/PSEN2/SLC2A13/ADAM10/LRRTM3/TMCC2	23
GO:0006066	alcohol metabolic process	64/2107	373/18888	0.171582	1.53813	3.71949	0.000300541	0.0122748	0.0106002	ALG13/DKK3/EDNRB/NFE2L1/LRP2/SQLE/APOE/APP/ASAH1/HMGCR/ALDH2/ADCYAP1R1/CACNA1H/ABCA2/AKR1B1/FDFT1/LSS/STARD3/PLCB1/SNCA/CYP51A1/PCBD1/PIP4P1/MOXD1/CLN8/FDXR/SLC5A3/ACADVL/NSDHL/IDH3A/INPP5B/QDPR/ITPK1/DHCR24/INPP5A/SOAT1/SC5D/IDH1/GDPD1/GNB3/PCK2/CAT/SORD/ALDH1B1/INPP4A/HMGCS1/PRKG1/IDH3B/SGPP1/EPHX2/IDI1/SCARB1/MSMO1/WNT4/COQ3/ACER3/INSIG1/GDE1/OSBPL5/PPIP5K1/NFKB1/NAPEPLD/TTC39B/ABCG4	64
GO:0042594	response to starvation	41/2107	212/18888	0.193396	1.73368	3.80661	0.000304316	0.0122935	0.0106163	SFRP1/MAP1LC3B/MAP1LC3A/CDKN1A/LRP11/GABARAP/SLC7A5/HSPA8/SESN2/MAPK1/EIF2A/EIF2S1/XBP1/MAPK8/RIPOR1/WRN/FOXK2/ACAT1/CLEC16A/BCAS3/SESN1/LAMP2/AMBRA1/ULK2/SEH1L/UPP1/STK24/PRKD1/MIOS/PCK2/PPM1D/EIF2AK4/RALB/WNT4/INHBB/ACADM/TFEB/LARP1/PPARA/ZFP36/IGF1R	41
GO:0048284	organelle fusion	33/2107	159/18888	0.207547	1.86054	3.86114	0.000305122	0.0122935	0.0106163	STX16/RAB3A/VAT1/VAMP2/CHMP5/CPLX2/RAB7A/UVRAG/SNCA/VTI1B/BAX/PIP4K2B/STX7/SNAP25/STX6/ANKRD27/SYT7/SEPTIN8/STX1A/VPS8/BAK1/NKD2/MIGA2/SYT9/VAMP7/HUWE1/STX17/THG1L/VAMP4/TBC1D4/PIP4K2A/ZDHHC6/C2CD5	33
GO:0016311	dephosphorylation	55/2107	309/18888	0.177994	1.59561	3.74052	0.00030733	0.0122994	0.0106214	ARPP19/CALM2/PINK1/YWHAE/PTPRD/PTPRU/PPP4R4/PTPRA/PLPPR1/NSMF/PXYLP1/IGBP1/PTPRO/SMG5/PPP1R7/ANKLE2/PPM1E/PPP6R3/PIP4P1/CRY2/HSP90B1/PTPRK/AMBRA1/SBF1/DUSP8/PPP2CB/INPP5B/MTMR6/PLPPR2/INPP5A/PPP3CC/PTPN5/NUAK1/BTRC/PTPN9/NCK2/DUSP22/PPM1D/PDGFRB/DUSP15/PDP2/PTPRM/SGPP1/PTPRE/PPM1H/NCK1/EPHX2/PLPPR5/PPP1R16B/PTPRG/PHLPP2/UBASH3B/INPP5K/IKBKB/HTT	55
GO:0007163	establishment or maintenance of cell polarity	43/2107	226/18888	0.190265	1.70562	3.78137	0.000317934	0.0126	0.010881	MAP1B/CLASP2/SHTN1/FEZ1/SCRIB/FRMD4A/CDC42BPB/FSCN1/CORO7/PAX6/MSN/CTNNA1/FAT1/RAC1/AMOT/RAB10/CLIC4/RAC3/FGF13/DST/PRKCI/RHOQ/CAP2/PARD6G/WNT7A/CYTH3/PARVA/FBF1/MAD2L1/UST/JAM3/WWC1/FOXJ1/MAP7/RHOBTB1/PARD6B/MTCL1/KRIT1/HTT/MPP7/PRICKLE1/WDR1/IGF1R	43
GO:0009060	aerobic respiration	39/2107	199/18888	0.19598	1.75684	3.80316	0.000319067	0.0126	0.010881	ATP5F1B/ATP5MG/NDUFA4/COX6A1/COX4I1/GHITM/UQCRB/MDH2/PINK1/DGUOK/ATP5F1C/NDUFA7/NDUFB5/SLC25A23/NDUFC1/SHMT2/COX7A2/COX5B/NDUFS8/SNCA/NIPSNAP2/SUCLG1/NDUFA6/COX6B1/IDH3A/UQCRC2/SDHA/SDHB/IDH1/NDUFB4/SLC25A33/CAT/ATP5PD/HIF1A/BID/IDH3B/OGDHL/FH/FXN	39
GO:1903533	regulation of protein targeting	20/2107	79/18888	0.253165	2.26947	4.00643	0.000323801	0.0127028	0.0109698	PRNP/TOMM7/PINK1/TOMM70/CIB1/USP36/ARIH2/HAX1/HPCA/ABLIM3/UBE2L3/PDCD5/GSK3A/FBXW7/KCNB1/HUWE1/MTCL1/INPP5K/MYO1C/C2CD5	20
GO:0070849	response to epidermal growth factor	14/2107	46/18888	0.304348	2.7283	4.15852	0.000333443	0.0129955	0.0112226	SYAP1/AKT1/ERBB4/MAPK1/BAIAP2/PPP1R9B/ZFP36L2/ZPR1/SOX9/DUSP22/ASCL1/INPP5K/NCL/ZFP36	14
GO:0007032	endosome organization	23/2107	97/18888	0.237113	2.12558	3.93815	0.000338607	0.0131111	0.0113224	ATP6V1A/LAPTM4B/SQSTM1/ATP6V0C/ATP6AP1/SCARB2/CHMP5/RAB7A/ATP6AP2/STX6/VPS36/ATP6V1F/SNX10/HGS/VTA1/CC2D1A/ATP6V0B/PLEKHA3/STAM/HOOK1/VAMP4/HOOK2/ATP6V1H	23
GO:0048388	endosomal lumen acidification	7/2107	14/18888	0.5	4.4822	4.61839	0.000358486	0.0137913	0.0119098	ATP6V1A/ATP6V0C/ATP6AP1/ATP6AP2/ATP6V1F/ATP6V0B/ATP6V1H	7
GO:0008064	regulation of actin polymerization or depolymerization	32/2107	154/18888	0.207792	1.86273	3.80914	0.000365307	0.0139636	0.0120586	PAK3/TMOD2/PIK3R2/ARPC2/NCKAP1/TMSB4X/BIN1/CYFIP2/TMSB15B/BAIAP2/ARPC3/SPTBN1/BRK1/PREX1/HIP1R/CYFIP1/HAX1/SPTBN4/TMOD3/CDC42EP1/NCK2/PRKCE/ADD3/SPTBN2/EPS8/SPTAN1/NCK1/SNX9/FER/PTK2B/MKKS/WDR1	32
GO:0042176	regulation of protein catabolic process	62/2107	362/18888	0.171271	1.53534	3.64416	0.000388938	0.0147722	0.0127569	PSMD10/USP9X/EEF1A2/LAPTM4B/CLU/PSMD3/HSP90AA1/LRP2/OAZ1/GABARAP/PSMF1/NRDC/SIRT2/APOE/AKT1/MSN/SF3B3/HMGCR/PINK1/PSMD1/ZYG11B/ABCA2/LPCAT1/CSNK1D/BAG6/RAB7A/SNCA/TMEM132A/CYP51A1/HERPUD1/BBS7/DVL1/SERPINE2/HECTD1/PSMC1/ZDHHC2/CD81/SOX9/HGS/FBXL20/FLNA/BTRC/MAD2L1/GSK3A/WFS1/RNF180/EZR/NKD2/KEAP1/FBXW7/GIPC1/CHFR/SNX9/PLK3/PSMD2/ITCH/USP38/F8A1/USP25/PRICKLE1/ADAM8/TRIB1	62
GO:0106027	neuron projection organization	22/2107	92/18888	0.23913	2.14366	3.8964	0.000398011	0.0149511	0.0129113	PAK3/ATP1A3/PRNP/APOE/APP/CTNND2/ABHD17B/CAPRIN1/BAIAP2/CAPRIN2/DVL1/GRIN2B/STAU2/WNT7A/DTNBP1/KIF1A/NLGN1/INSR/ARHGAP44/ZNF365/ITGA3/IGF1R	22
GO:0061951	establishment of protein localization to plasma membrane	17/2107	63/18888	0.269841	2.41897	3.99742	0.000398662	0.0149511	0.0129113	NSG1/GOLGA7/SCRIB/OPTN/ATP6AP1/SCARB2/VAMP2/RAB10/RAB7A/SPTBN1/CSK/ZDHHC2/GORASP1/GRIP2/GRIP1/ARHGAP44/PKDCC	17
GO:0019693	ribose phosphate metabolic process	78/2107	480/18888	0.1625	1.45672	3.59144	0.000409103	0.0151977	0.0131243	DDIT4/ATP1B1/CTPS2/ATP5F1B/SLC25A1/ATP6V1A/PDK3/ATP5MG/ADCY2/NME2/NME1/CASK/ATP6V0C/APP/FAR1/ACOT7/TMSB4X/HMGCR/ACSL4/PINK1/HSPA8/GIT1/ATP5F1C/NDUFA7/NDUFB5/ATIC/NDUFC1/ATP5MC2/ACSBG1/NDUFS8/SNCA/CTPS1/FOXK2/PDHX/SUCLG1/ACAT1/NT5C2/NDUFA6/PDE1A/PRPSAP1/RHOQ/GUCY1B1/NUDT2/SLC25A13/MPC2/SDHA/NUDT7/PDE9A/UCK2/SDHB/HACD2/UPP1/NDUFB4/ADCY1/ATP5PD/HMGCS1/HIF1A/TIGAR/MPP1/AK1/CACNB4/ELOVL1/INSR/ADCY3/OG…	78
GO:0036010	protein localization to endosome	10/2107	27/18888	0.37037	3.32015	4.27485	0.000410335	0.0151977	0.0131243	SCRIB/MSN/ABHD17B/AKAP11/NF2/PACSIN2/NRP1/EZR/MICALL1/TMEM30A	10
GO:0014003	oligodendrocyte development	14/2107	47/18888	0.297872	2.67025	4.0624	0.000426674	0.0156089	0.0134794	NKX6-2/CLU/GPM6B/PLP1/CNTN1/NKX2-2/WASF3/ABCA2/B4GALT5/EIF2B2/MIOS/TENM4/ASCL1/HDAC11	14
GO:1900271	regulation of long-term synaptic potentiation	14/2107	47/18888	0.297872	2.67025	4.0624	0.000426674	0.0156089	0.0134794	NSG1/PRNP/SQSTM1/APOE/CALB2/APP/ZDHHC2/PTN/PDE9A/STAU1/ADCY1/EIF2AK4/FAM107A/SCGN	14
GO:0007626	locomotory behavior	39/2107	202/18888	0.193069	1.73075	3.69992	0.000436107	0.0157229	0.0135778	CHL1/CCND2/UCHL1/PBX3/ARRDC3/EFNB3/SEZ6/CNTN1/APOE/APP/GAD1/GIT1/ID2/ABCA2/B4GALT2/SNCA/CDH23/CLN8/ARRB2/SNAP25/SOD2/ANKH/APBA1/SPTBN4/TNR/VPS13A/MEIS1/PRKCE/ASTN1/EPS8/TBCE/RCAN1/CACNB4/SLC4A10/RASD2/PDE1B/TRH/FXN/PAK6	39
GO:0051402	neuron apoptotic process	52/2107	292/18888	0.178082	1.5964	3.63936	0.000436277	0.0157229	0.0135778	CHL1/BCL2L1/CLU/PRNP/APP/PINK1/NRBP2/CDC34/FAIM2/CASP3/NTRK2/SNCA/BAX/NSMF/BTG2/TNFRSF21/CASP9/SIGMAR1/CLN8/BACE1/SOD2/NRP1/ZPR1/PRKCI/AMBRA1/SLC25A27/SYNGAP1/DIO3/COL6A2/FBXO7/SRPK2/DLX1/GSK3A/WFS1/HIF1A/THAP11/PLXND1/FBXW7/ASCL1/BID/KCNB1/PYCR1/NPPC/ST8SIA2/GRID2/HYOU1/UNC5B/PTK2B/GCLM/PIGT/ADAM8/RETREG1	52
GO:0007229	integrin-mediated signaling pathway	25/2107	111/18888	0.225225	2.01901	3.81533	0.000442972	0.0157229	0.0135778	NME2/CTNNA1/CUL3/CD47/ZYX/PTPRA/BCAR1/NRP1/DST/COL3A1/PTN/ADAM15/CCN2/FLNA/PRKD1/CCM2/THY1/RCC2/SEMA7A/ADAM10/PTK2B/ADAMTS1/FERMT2/ISG15/ITGA3	25
GO:0030038	contractile actin filament bundle assembly	25/2107	111/18888	0.225225	2.01901	3.81533	0.000442972	0.0157229	0.0135778	SFRP1/CLASP2/PIK3R2/ACTG1/CUL3/ZEB2/RAC1/CD47/ZYX/NF2/RHOC/LIMK1/PPM1E/NRP1/TGFBR1/RHPN2/CCN2/ARRB1/F11R/WNT4/INPP5K/SORBS1/PTK2B/MKKS/FERMT2	25
GO:0043149	stress fiber assembly	25/2107	111/18888	0.225225	2.01901	3.81533	0.000442972	0.0157229	0.0135778	SFRP1/CLASP2/PIK3R2/ACTG1/CUL3/ZEB2/RAC1/CD47/ZYX/NF2/RHOC/LIMK1/PPM1E/NRP1/TGFBR1/RHPN2/CCN2/ARRB1/F11R/WNT4/INPP5K/SORBS1/PTK2B/MKKS/FERMT2	25
GO:0097061	dendritic spine organization	20/2107	81/18888	0.246914	2.21343	3.87796	0.000460925	0.0162334	0.0140187	PAK3/PRNP/APOE/CTNND2/ABHD17B/CAPRIN1/BAIAP2/CAPRIN2/DVL1/GRIN2B/STAU2/WNT7A/DTNBP1/KIF1A/NLGN1/INSR/ARHGAP44/ZNF365/ITGA3/IGF1R	20
GO:0006835	dicarboxylic acid transport	23/2107	99/18888	0.232323	2.08264	3.82696	0.000462801	0.0162334	0.0140187	LRP2/SLC7A11/SLC1A4/SLC1A2/GABBR1/SLC26A11/SLC1A3/NTRK2/SNCA/CLN8/SLC1A5/SLC25A13/APBA1/LRRC8B/SLC1A6/TRPV1/ARL6IP1/SLC13A3/PRKG1/DTNBP1/GIPC1/TRH/SLC19A2	23
GO:0071277	cellular response to calcium ion	21/2107	87/18888	0.241379	2.16382	3.85532	0.000466967	0.0162838	0.0140622	CPNE1/JUND/SLC25A23/CPNE2/CLIC4/CAMK2D/RYR3/SYT7/HPCA/MEF2A/ADCY1/CPNE6/SYT17/SYT9/CPNE7/NLGN1/KCNB1/INHBB/RASGRP2/SYT10/RYR1	21
GO:2001234	negative regulation of apoptotic signaling pathway	45/2107	244/18888	0.184426	1.65327	3.63935	0.000476354	0.0165145	0.0142615	PSMD10/BCL2L1/CLU/TRAP1/GRINA/PEA15/CDKN2D/AKT1/GHITM/CTNNA1/PINK1/GNAI2/XBP1/DDX3X/FAIM2/BAX/ACVR1/HERPUD1/SCG2/ARHGEF2/SOD2/NRP1/TRIAP1/TGFBR1/SIAH2/NOC2L/FBXO7/CTH/WFS1/BAK1/HIF1A/BID/SCRT2/ATAD5/PYCR1/WNT4/HYOU1/UNC5B/IFI6/TAF9B/CREB3L1/GCLM/STRADB/FXN/HTT	45
GO:0043434	response to peptide hormone	72/2107	438/18888	0.164384	1.4736	3.5535	0.000479662	0.0165331	0.0142775	SYAP1/EDNRB/NKX6-1/NME2/MAP1B/PIK3R2/AKT1/PAX6/BSG/NUDC/AHCYL1/PRKCA/VAMP2/FAT1/GNAI2/SESN2/MAPK1/XBP1/SORT1/ASS1/CAMK2A/RAB10/PTPRA/BAIAP2/CTSD/BCAR1/PLCB1/PIP4K2B/BTG2/APPL1/IRS2/CRY2/MAPK14/EIF2B2/CSK/COL3A1/PRKCI/RHOQ/CYFIP1/GRB10/RANGAP1/PRKD1/DENND4C/PCK2/GNAI1/SLC25A33/GSK3A/CAT/HDAC9/HDAC5/TRPV1/HSF1/INSR/PTPRE/NCK1/FER/STAT3/GDF15/INHBB/VPS13C/INPP5K/INSIG1/SORBS1/TBC1D4/MYO1C/CPEB1/PIP4…	72
GO:0010639	negative regulation of organelle organization	62/2107	365/18888	0.169863	1.52272	3.57327	0.000485887	0.0166514	0.0143797	PSMD10/TMOD2/STMN2/BCL2L1/CLU/ARHGEF7/MAP1B/CLASP2/FEZ1/AKT1/GHITM/TMSB4X/VAT1/PINK1/LCMT1/HNRNPC/CIB1/BAZ1B/TMSB15B/RAB7A/SPTBN1/SNCA/CTNNA2/USP10/DYNC1LI1/FGF13/ARHGEF2/ANKRD27/TRIAP1/TOM1L2/XRN1/RHPN2/HIP1R/SUB1/SPTBN4/IK/TMOD3/PCID2/NAA10/MAD2L1/AURKAIP1/TPX2/BAK1/ADD3/SPTBN2/F11R/EPS8/KAT2A/SPTAN1/TIGAR/TBC1D30/MID1/HUWE1/ERCC4/INPP5K/TBC1D4/TERF2/MKKS/NAV3/TENT4B/FXN/PINX1	62
GO:0009314	response to radiation	71/2107	431/18888	0.164733	1.47673	3.54764	0.000491907	0.0167018	0.0144232	CCND2/GNAQ/BCL2L1/SFRP1/CDKN1A/RHOB/SMC1A/CDKN2D/DYNLRB1/AKT1/SLC7A11/APP/HMGCR/SLC1A2/ID2/AEN/EIF2S1/MAPK8/SLC1A3/PER1/VCAM1/CASP3/SDF4/PPID/B4GALT2/TP53INP1/BAX/WRN/RNF8/CASP9/NR2F6/CRY2/MAPK14/PTPRK/SOD2/TRIAP1/COL3A1/PITPNM1/MEN1/CDC25A/PLEKHB1/SYNGAP1/NOC2L/COL6A2/BRAT1/CRYAB/MYC/POLH/KCNC2/PPM1D/CAT/BAK1/RRM1/EIF2AK4/HIF1A/TIGAR/HSF1/TP53I13/CACNB4/HUS1/PLK3/SCARA3/SLC4A10/ERCC4/FANCG/BLM/P…	71
GO:0009201	ribonucleoside triphosphate biosynthetic process	26/2107	118/18888	0.220339	1.97521	3.7654	0.000492961	0.0167018	0.0144232	CTPS2/ATP5F1B/ATP6V1A/ATP5MG/NME2/NME1/ATP6V0C/TMSB4X/PINK1/ATP5F1C/NDUFA7/NDUFB5/NDUFC1/ATP5MC2/NDUFS8/CTPS1/NDUFA6/NUDT2/SLC25A13/SDHA/UCK2/SDHB/NDUFB4/ATP5PD/UCKL1/PPARA	26
GO:0030832	regulation of actin filament length	32/2107	157/18888	0.203822	1.82714	3.68768	0.000521504	0.0175691	0.0151722	PAK3/TMOD2/PIK3R2/ARPC2/NCKAP1/TMSB4X/BIN1/CYFIP2/TMSB15B/BAIAP2/ARPC3/SPTBN1/BRK1/PREX1/HIP1R/CYFIP1/HAX1/SPTBN4/TMOD3/CDC42EP1/NCK2/PRKCE/ADD3/SPTBN2/EPS8/SPTAN1/NCK1/SNX9/FER/PTK2B/MKKS/WDR1	32
GO:0021889	olfactory bulb interneuron differentiation	6/2107	11/18888	0.545455	4.88968	4.57244	0.000537171	0.0177329	0.0153136	ARX/ERBB4/ATF5/DLX5/SALL1/ROBO2	6
GO:0070778	L-aspartate transmembrane transport	6/2107	11/18888	0.545455	4.88968	4.57244	0.000537171	0.0177329	0.0153136	SLC1A4/SLC1A2/SLC1A3/SLC1A5/SLC25A13/SLC1A6	6
GO:1903305	regulation of regulated secretory pathway	27/2107	125/18888	0.216	1.93631	3.72159	0.000540671	0.0177329	0.0153136	CASK/RAB3A/GNAI2/GIT1/CSPG5/RIMS3/GAB2/DVL1/SYT7/STX1A/CDK5R2/WNT7A/FBXL20/MICAL1/RAB15/SYT17/SYT9/VAMP7/DTNBP1/NLGN1/SNX4/CACNB4/KCNB1/BCR/SYT10/RIMS1/FBXO45	27
GO:0016601	Rac protein signal transduction	14/2107	48/18888	0.291667	2.61462	3.96876	0.000541235	0.0177329	0.0153136	GABARAP/NCKAP1/RAC1/STMN3/RAC3/KBTBD6/BRK1/ELMO1/HACE1/CYFIP1/FARP2/EPS8/ARHGAP44/DOCK5	14
GO:2001222	regulation of neuron migration	14/2107	48/18888	0.291667	2.61462	3.96876	0.000541235	0.0177329	0.0153136	NKX6-1/SHTN1/PAX6/CAMK2A/PLAA/NSMF/CTNNA2/ARHGEF2/COL3A1/FLNA/NRG3/SCRT2/STAT3/NTNG1	14
GO:0043648	dicarboxylic acid metabolic process	22/2107	94/18888	0.234043	2.09805	3.78166	0.000546811	0.0178177	0.0153868	GOT2/SLC7A11/MDH2/GAD1/ATIC/ASS1/MTHFD2/GRHPR/GLUD1/SDHA/IDH1/PCK2/GLS/GAD2/PHYH/MTRR/GLS2/OGDHL/ADHFE1/FH/GCLM/ALDH1L2	22
GO:0099072	regulation of postsynaptic membrane neurotransmitter receptor levels	21/2107	88/18888	0.238636	2.13923	3.79559	0.000549868	0.0178199	0.0153888	NSG1/HSP90AA1/SCRIB/ERBB4/CACNG7/CACNG4/AP2A2/CALY/LGI1/SNAP25/VAC14/PRKCI/HPCA/GRIP2/IQSEC2/GRIP1/NETO2/PORCN/EPS8/ARHGAP44/ADAM10	21
GO:0098876	vesicle-mediated transport to the plasma membrane	31/2107	151/18888	0.205298	1.84037	3.67381	0.00055595	0.0179196	0.0154749	NSG1/GOLGA7/STX16/SCRIB/OPTN/ATP6AP1/SCARB2/VAMP2/RAB10/RAB7A/SPTBN1/WIPF3/RAB11FIP4/VPS53/SNAP25/STX6/ANKRD27/CSK/EXOC2/ZDHHC2/HGS/GRIP2/GRIP1/SNX4/VPS52/DENND1B/ARHGAP44/VAMP4/MICALL1/OSBPL5/PKDCC	31
GO:0045055	regulated exocytosis	42/2107	225/18888	0.186667	1.67336	3.60039	0.000559281	0.0179301	0.0154839	CASK/RAB3A/SCRIB/VAMP2/GNAI2/GIT1/NAPA/CADPS/CPLX2/RAB10/SDF4/SNCA/CSPG5/RIMS3/SYNGR1/S100A13/CTBP2/GAB2/SNAP25/DVL1/SYT7/STX1A/CDK5R2/WNT7A/FBXL20/SYN2/MICAL1/RAB15/SYT17/SYT9/VAMP7/DTNBP1/NLGN1/SNX4/CACNB4/KCNB1/SNPH/SYNGR2/BCR/SYT10/RIMS1/FBXO45	42
GO:0006906	vesicle fusion	26/2107	119/18888	0.218487	1.95861	3.71706	0.000565	0.0180166	0.0155586	STX16/RAB3A/VAMP2/CHMP5/CPLX2/RAB7A/UVRAG/SNCA/VTI1B/PIP4K2B/STX7/SNAP25/STX6/ANKRD27/SYT7/SEPTIN8/STX1A/VPS8/NKD2/SYT9/VAMP7/STX17/VAMP4/TBC1D4/PIP4K2A/C2CD5	26
GO:0000209	protein polyubiquitination	48/2107	267/18888	0.179775	1.61158	3.56624	0.000571559	0.0181288	0.0156555	DTX4/GABARAP/PRPF19/RMND5A/CUL3/CDC34/WSB2/MGRN1/DDX3X/PLAA/UBE2J1/RNF8/AMFR/UBE2QL1/NT5C2/RNF20/UBE2D2/KBTBD6/TRAF3/ARIH2/CUL1/HECTD1/HACE1/AMBRA1/GPS2/RUSC1/UBE2E2/UBE2L3/PELI2/FBXO7/THOP1/UBE2E1/UBE2T/ANAPC4/BTRC/TRAF6/TRIM22/TRAF2/RNF180/LRSAM1/CHFR/RIPK2/TRIM26/HUWE1/ITCH/RNF217/ANAPC7/FBXO45	48
GO:0031396	regulation of protein ubiquitination	38/2107	198/18888	0.191919	1.72044	3.61103	0.000578099	0.0182392	0.0157508	PSMD10/ARRDC3/HSP90AA1/SQSTM1/GABARAP/AKT1/PINK1/CUL3/DDX3X/PLAA/LIMK1/HERPUD1/ARRB2/TGFBR1/GTPBP4/GPS2/SIAH2/SEPTIN4/UBE2L3/PRMT3/BTRC/ARRB1/TRAF6/MAD2L1/GSK3A/PRKCE/WFS1/RNF180/FBXW7/CHFR/RIPK2/HUWE1/FAM107A/ISG15/SPRTN/MINAR1/PRICKLE1/PINX1	38
GO:0006865	amino acid transport	32/2107	158/18888	0.202532	1.81558	3.64778	0.000585325	0.0182738	0.0157807	SLC7A11/SLC7A5/SLC6A9/SLC1A4/SLC3A2/SLC1A2/GABBR1/SLC1A3/NTRK2/SNCA/CLN8/SLC6A15/SLC1A5/SLC25A13/APBA1/LRRC8B/SLC7A6/SLC7A1/SLC1A6/SERINC5/TRPV1/ARL6IP1/PRKG1/DTNBP1/GIPC1/CACNB4/SLC6A17/SLC7A3/SLC17A5/SFXN5/SLC22A15/TRH	32
GO:0030902	hindbrain development	32/2107	158/18888	0.202532	1.81558	3.64778	0.000585325	0.0182738	0.0157807	NLGN4X/SEZ6/CNTN1/MYO16/SCRIB/WLS/PAX6/ATP1B2/ATF5/ATIC/FAIM2/TBR1/SDF4/MAP2K1/B4GALT2/CTNNA2/SMAD1/SERPINE2/CDK5R2/WNT7A/FLNA/PSMG1/SPTBN2/HERC1/KAT2A/PRKG1/ASCL1/GRID2/TRNP1/ZNF365/NANOS1/IGF1R	32
GO:0061684	chaperone-mediated autophagy	7/2107	15/18888	0.466667	4.18339	4.37038	0.000607554	0.018869	0.0162947	EEF1A2/CLU/HSP90AA1/HSPA8/SNCA/LAMP2/PLK3	7
GO:0009142	nucleoside triphosphate biosynthetic process	27/2107	126/18888	0.214286	1.92094	3.67522	0.000616295	0.0190413	0.0164435	CTPS2/ATP5F1B/ATP6V1A/ATP5MG/NME2/NME1/ATP6V0C/TMSB4X/PINK1/ATP5F1C/NDUFA7/NDUFB5/NDUFC1/ATP5MC2/NDUFS8/CTPS1/NDUFA6/NUDT2/SLC25A13/SDHA/UCK2/SDHB/NDUFB4/ATP5PD/AK1/UCKL1/PPARA	27
GO:1902652	secondary alcohol metabolic process	31/2107	152/18888	0.203947	1.82827	3.63294	0.000625172	0.0191935	0.016575	NFE2L1/SQLE/APOE/APP/HMGCR/FDFT1/LSS/STARD3/CYP51A1/PIP4P1/CLN8/FDXR/ACADVL/NSDHL/IDH3A/DHCR24/SOAT1/SC5D/IDH1/GNB3/CAT/HMGCS1/IDH3B/EPHX2/IDI1/SCARB1/MSMO1/INSIG1/OSBPL5/TTC39B/ABCG4	31
GO:0001101	response to acid chemical	29/2107	139/18888	0.208633	1.87027	3.64903	0.00062766	0.0191935	0.016575	BCL2L1/ATP2B4/LRP11/SLC7A5/LAMTOR2/CUL3/SLC1A2/SESN2/EIF2S1/TOMM70/XBP1/ASS1/CASP3/NTRK2/BAIAP2/PPP1R9B/CAPN2/NSMF/SESN1/COL3A1/HPCA/CPEB3/COL18A1/HSF1/KCNB1/GCLM/IPO5/CPEB1/IGF1R	29
GO:0010970	transport along microtubule	34/2107	172/18888	0.197674	1.77203	3.60412	0.000635999	0.0193493	0.0167095	UCHL1/MAP1B/FEZ1/APP/DYNC1H1/TUB/KIF1B/ARL8A/MAPK8IP3/DYNC1I1/AP3M1/CALY/BICD1/BLOC1S2/KIF3A/DST/IFT57/APBA1/DYNLL1/STAU2/STAU1/BORCS5/BICD2/HSBP1/HIF1A/IFT52/DTNBP1/KIF1A/PEX14/ARHGAP21/TERF2/SSNA1/RAB27B/HTT	34
GO:0010977	negative regulation of neuron projection development	30/2107	146/18888	0.205479	1.842	3.61898	0.000666428	0.0200265	0.0172943	STMN2/EFNB3/APOE/SPOCK1/DGUOK/NEO1/CIB1/PTPRO/RTN4R/SEMA6C/FGF13/NRP1/SEMA4F/PAQR3/SYNGAP1/ULK2/TNR/FLNA/PTPN9/GSK3A/THY1/DTNBP1/NLGN1/SEMA7A/KREMEN1/PTPRG/B2M/MINAR1/ZNF365/ZNF296	30
GO:0051592	response to calcium ion	30/2107	146/18888	0.205479	1.842	3.61898	0.000666428	0.0200265	0.0172943	CPNE1/CALM2/S100A16/AHCYL1/JUND/SLC25A23/CPNE2/CLIC4/ENTPD6/CAMK2D/RYR3/SYT7/SLC25A13/HPCA/MEF2A/ADCY1/CPNE6/SYT17/SYT9/CPNE7/NLGN1/KCNB1/KCNIP2/INHBB/PTK2B/RASGRP2/STIM1/SYT10/ANXA11/RYR1	30
GO:0061462	protein localization to lysosome	16/2107	60/18888	0.266667	2.39051	3.82254	0.000674207	0.0200265	0.0172943	CLU/AKT1/CACNG7/CACNG4/SCARB2/HSPA8/SORT1/RAB7A/AP3M1/PXK/VPS53/LAMP2/ZFYVE16/CD81/HGS/NCOA4	16
GO:0000045	autophagosome assembly	25/2107	114/18888	0.219298	1.96588	3.66523	0.000674406	0.0200265	0.0172943	MAP1LC3B/MAP1LC3A/ATG4A/GABARAP/FEZ1/PINK1/RAB7A/CTSD/TP53INP1/PIP4K2B/AMBRA1/EMC6/ULK2/ATG2B/EFNB1/TBC1D12/TRAF6/ATG4C/LRSAM1/RALB/SNX4/ATG2A/STX17/SNX18/PIP4K2A	25
GO:0032868	response to insulin	48/2107	269/18888	0.178439	1.5996	3.50963	0.000677453	0.0200265	0.0172943	SYAP1/PIK3R2/AKT1/PAX6/VAMP2/GNAI2/SESN2/MAPK1/XBP1/SORT1/RAB10/PTPRA/BAIAP2/CTSD/BCAR1/PIP4K2B/APPL1/IRS2/CRY2/MAPK14/PRKCI/RHOQ/CYFIP1/GRB10/DENND4C/PCK2/SLC25A33/GSK3A/CAT/HDAC9/HDAC5/INSR/PTPRE/NCK1/FER/INHBB/VPS13C/INPP5K/INSIG1/SORBS1/TBC1D4/MYO1C/CPEB1/PIP4K2A/PPARA/C2CD5/NCL/IGF1R	48
GO:0007033	vacuole organization	43/2107	234/18888	0.183761	1.64731	3.5305	0.000678409	0.0200265	0.0172943	ATP6V1A/LAPTM4B/MAP1LC3B/MAP1LC3A/ATG4A/GABARAP/FEZ1/ATP6V0C/ATP6AP1/PINK1/SCARB2/CHMP5/RAB7A/CTSD/TP53INP1/PIP4K2B/ATP6AP2/CLN8/B4GALNT1/SYT7/LAMP2/ATP6V1F/AMBRA1/EMC6/ULK2/ATG2B/EFNB1/TBC1D12/TRAF6/ATG4C/LRSAM1/RALB/ATP6V0B/SNX4/ATG2A/TMEM106B/STX17/HOOK1/HOOK2/TFEB/SNX18/PIP4K2A/ATP6V1H	43
GO:0009259	ribonucleotide metabolic process	75/2107	466/18888	0.160944	1.44277	3.42931	0.00069406	0.0203876	0.0176061	DDIT4/ATP1B1/CTPS2/ATP5F1B/SLC25A1/ATP6V1A/PDK3/ATP5MG/ADCY2/NME2/NME1/CASK/ATP6V0C/APP/FAR1/ACOT7/TMSB4X/HMGCR/ACSL4/PINK1/HSPA8/GIT1/ATP5F1C/NDUFA7/NDUFB5/ATIC/NDUFC1/ATP5MC2/ACSBG1/NDUFS8/SNCA/CTPS1/FOXK2/PDHX/SUCLG1/ACAT1/NT5C2/NDUFA6/PDE1A/RHOQ/GUCY1B1/NUDT2/SLC25A13/MPC2/SDHA/NUDT7/PDE9A/UCK2/SDHB/HACD2/UPP1/NDUFB4/ADCY1/ATP5PD/HMGCS1/HIF1A/TIGAR/MPP1/AK1/CACNB4/ELOVL1/INSR/ADCY3/OGDHL/STAT…	75
GO:0031623	receptor internalization	27/2107	127/18888	0.212598	1.90582	3.62927	0.000701017	0.020491	0.0176954	SCRIB/LRPAP1/CACNG7/CACNG4/NECAB2/GRK2/AP2A2/CALY/SNCA/ANKRD13B/ANKRD13D/ARRB2/SNAP25/VAC14/CD81/HPCA/HGS/PICALM/ARRB1/RAMP1/EZR/RALB/LRRTM2/DTNBP1/INSR/ATXN2/ITCH	27
GO:0030705	cytoskeleton-dependent intracellular transport	38/2107	200/18888	0.19	1.70324	3.54275	0.000706024	0.0205367	0.0177349	UCHL1/MAP1B/FEZ1/APP/DYNC1H1/TUB/KIF1B/ARL8A/MAPK8IP3/DYNC1I1/AP3M1/CALY/BICD1/BLOC1S2/KIF3A/DST/IFT57/APBA1/DYNLL1/STAU2/STAU1/BORCS5/BICD2/HSBP1/HIF1A/IFT52/DTNBP1/KIF1A/PEX14/HOOK1/ARHGAP21/F8A1/HOOK2/TERF2/SSNA1/RAB27B/HTT/PRICKLE1	38
GO:0015800	acidic amino acid transport	17/2107	66/18888	0.257576	2.30901	3.77475	0.000715862	0.0206037	0.0177928	SLC7A11/SLC1A4/SLC1A2/GABBR1/SLC1A3/NTRK2/SNCA/CLN8/SLC25A13/APBA1/SLC1A6/TRPV1/ARL6IP1/PRKG1/DTNBP1/GIPC1/TRH	17
GO:0017156	calcium-ion regulated exocytosis	17/2107	66/18888	0.257576	2.30901	3.77475	0.000715862	0.0206037	0.0177928	RAB3A/VAMP2/GNAI2/CADPS/SDF4/RIMS3/SNAP25/SYT7/STX1A/CDK5R2/SYN2/SYT17/SYT9/VAMP7/KCNB1/SYT10/RIMS1	17
GO:0007042	lysosomal lumen acidification	9/2107	24/18888	0.375	3.36165	4.10213	0.000718694	0.0206037	0.0177928	ATP6V1A/ATP6V0C/ATP6AP1/ATP6AP2/LAMP2/ATP6V1F/ATP6V0B/TMEM106B/ATP6V1H	9
GO:0046486	glycerolipid metabolic process	66/2107	400/18888	0.165	1.47913	3.43194	0.000728886	0.0207959	0.0179587	ENPP2/APOE/PIK3R2/FAR1/PCYT1B/LPCAT1/MBOAT7/PI4KA/EFR3B/PTDSS1/CAPN2/PLCB1/UVRAG/PIP4K2B/PGAP1/FABP5/PEMT/PIP4P1/LPCAT4/ABCA3/DGKD/PITPNM1/VAC14/CHPT1/SELENOI/INPP5B/MTMR6/INPP5A/DGKI/ABHD5/GDPD1/PDGFA/GNB3/PCK2/NR1H3/CAT/PIGZ/ABHD6/PRDX6/PDGFRB/SERINC5/INPP4A/LMF1/GAL3ST1/DGKE/PITPNM2/LPL/FBXW7/PCYT2/PIGA/SCARB1/DGKZ/PLCD1/DHRS7B/INPP5K/INSIG1/GDE1/SOCS7/PLCB3/PIP5KL1/OSBPL5/PIGT/PIP4K2A/INPP1/N…	66
GO:0090174	organelle membrane fusion	26/2107	121/18888	0.214876	1.92624	3.62178	0.000737157	0.0208049	0.0179665	STX16/RAB3A/VAMP2/CHMP5/CPLX2/RAB7A/UVRAG/SNCA/VTI1B/PIP4K2B/STX7/SNAP25/STX6/ANKRD27/SYT7/SEPTIN8/STX1A/VPS8/NKD2/SYT9/VAMP7/STX17/VAMP4/TBC1D4/PIP4K2A/C2CD5	26
GO:1903539	protein localization to postsynaptic membrane	13/2107	44/18888	0.295455	2.64857	3.8793	0.000739667	0.0208049	0.0179665	NSG1/SCRIB/ERBB4/CACNG7/LGI1/SNAP25/ZDHHC2/GRIP2/IQSEC2/GRIP1/NETO2/ARHGAP44/ADAM10	13
GO:2000300	regulation of synaptic vesicle exocytosis	13/2107	44/18888	0.295455	2.64857	3.8793	0.000739667	0.0208049	0.0179665	CASK/RAB3A/GIT1/CSPG5/RIMS3/DVL1/WNT7A/FBXL20/DTNBP1/NLGN1/CACNB4/RIMS1/FBXO45	13
GO:0032456	endocytic recycling	21/2107	90/18888	0.233333	2.09169	3.6785	0.000754624	0.0211259	0.0182437	NSG1/STX16/SCRIB/ATP6AP1/SCARB2/RAB7A/WIPF3/RAB11FIP4/VPS53/STX6/ANKRD27/ZDHHC2/HGS/GRIP2/GRIP1/SNX4/VPS52/DENND1B/ARHGAP44/VAMP4/MICALL1	21
GO:0086001	cardiac muscle cell action potential	20/2107	84/18888	0.238095	2.13438	3.69214	0.000760247	0.0211839	0.0182938	ATP1B1/BIN1/YWHAE/CACNA2D1/FGF13/CAMK2D/CACNB2/KCND3/FLNA/ATP1A1/KCNJ3/SCN9A/DSG2/HCN2/HCN4/KCNIP2/SNTA1/CACNA1C/GPD1L/SCN8A	20
GO:0030258	lipid modification	37/2107	194/18888	0.190722	1.70971	3.52073	0.000765331	0.0212264	0.0183305	CNR1/AKT1/SESN2/MBOAT7/PLPPR1/ACAT1/IRS2/PIP4P1/MAPK14/DGKD/B4GALNT1/ACADVL/ACAT2/INPP5B/SOX9/MTMR6/PLPPR2/INPP5A/DGKI/ACAA1/PEX5/PORCN/PHYH/DGKE/SLC25A17/SGPP1/EPHX2/PLPPR5/DGKZ/ST3GAL4/HSD17B4/INPP5K/ACADM/ACADS/AUH/ALDH1L2/PPARA	37
GO:0048259	regulation of receptor-mediated endocytosis	25/2107	115/18888	0.217391	1.94878	3.61621	0.000772072	0.0213142	0.0184063	CLU/SCRIB/LRPAP1/NECAB2/RAC1/ABCA2/ANKRD13B/ANKRD13D/BICD1/AAK1/ARRB2/DGKD/SH3GL3/VAC14/HIP1R/CCDC32/HPCA/PICALM/SNAP91/ARRB1/LRRTM2/DTNBP1/INSR/ATXN2/B2M	25
GO:0009411	response to UV	31/2107	154/18888	0.201299	1.80452	3.55213	0.000786683	0.0216175	0.0186682	CDKN1A/CDKN2D/AKT1/EIF2S1/MAPK8/CASP3/SDF4/PPID/TP53INP1/BAX/WRN/CASP9/MAPK14/PTPRK/TRIAP1/MEN1/CDC25A/NOC2L/COL6A2/MYC/POLH/CAT/BAK1/EIF2AK4/TP53I13/HUS1/SCARA3/ERCC4/SPRTN/BMF/CRIP1	31
GO:1901888	regulation of cell junction assembly	40/2107	215/18888	0.186047	1.6678	3.48948	0.000798692	0.0218468	0.0188662	SFRP1/GPM6B/EFNB3/CLSTN3/CLASP2/APP/ACTG1/MDGA1/LRFN4/RAC1/MAP4K4/PTPRD/FLRT3/NTRK2/PTPRA/SNCA/RAPGEF1/SNAP25/NRP1/ROBO2/STAU2/WNT7A/SYNDIG1/THBS2/DUSP22/THY1/F11R/LRRTM2/NLGN1/RCC2/WNT4/ST8SIA2/CLSTN2/GRID2/FAM107A/PTK2B/LRRTM3/MYO1C/FERMT2/IKBKB	40
GO:1903749	positive regulation of establishment of protein localization to mitochondrion	11/2107	34/18888	0.323529	2.90025	3.92964	0.000806953	0.0218721	0.0188881	TOMM7/PINK1/TOMM70/USP36/ARIH2/ABLIM3/UBE2L3/PDCD5/GSK3A/FBXW7/HUWE1	11
GO:1903955	positive regulation of protein targeting to mitochondrion	11/2107	34/18888	0.323529	2.90025	3.92964	0.000806953	0.0218721	0.0188881	TOMM7/PINK1/TOMM70/USP36/ARIH2/ABLIM3/UBE2L3/PDCD5/GSK3A/FBXW7/HUWE1	11
GO:0006119	oxidative phosphorylation	30/2107	148/18888	0.202703	1.81711	3.53615	0.000841846	0.0227146	0.0196157	ATP5F1B/ATP5MG/NDUFA4/COX6A1/COX4I1/GHITM/UQCRB/PINK1/DGUOK/ATP5F1C/NDUFA7/NDUFB5/SLC25A23/NDUFC1/SHMT2/COX7A2/COX5B/NDUFS8/SNCA/NIPSNAP2/NDUFA6/COX6B1/UQCRC2/SDHA/SDHB/NDUFB4/SLC25A33/ATP5PD/BID/FXN	30
GO:0007215	glutamate receptor signaling pathway	14/2107	50/18888	0.28	2.51003	3.78843	0.000849866	0.0228277	0.0197133	GNAQ/PRNP/PLP1/APP/NECAB2/GRIA2/PLCB1/HOMER2/GRIN2B/KCNB1/GRIA4/GRID2/PTK2B/GRIA3	14
GO:0008652	amino acid biosynthetic process	17/2107	67/18888	0.253731	2.27455	3.70321	0.000861062	0.0230247	0.0198835	PSAT1/GOT2/GAD1/SLC1A3/ASS1/SHMT2/PHGDH/GLUD1/SRR/APIP/GLS/CTH/GAD2/SERINC5/MTRR/GLS2/PYCR1	17
GO:0090201	negative regulation of release of cytochrome c from mitochondria	8/2107	20/18888	0.4	3.58576	4.09964	0.000865171	0.0230313	0.0198892	PSMD10/BCL2L1/CLU/AKT1/GHITM/TRIAP1/BAK1/FXN	8
GO:0022900	electron transport chain	34/2107	175/18888	0.194286	1.74166	3.49265	0.000875247	0.023196	0.0200314	NDUFA4/COX6A1/COX4I1/POR/GHITM/UQCRB/PINK1/ALDH2/DGUOK/NDUFA7/AKR1B1/NDUFB5/NDUFC1/COX7A2/COX5B/NDUFS8/SNCA/PHGDH/NDUFA6/SOD2/COX6B1/UQCRC2/SLC25A13/QDPR/SDHA/SDHB/NDUFB4/CYB5A/THAP11/BID/IDH3B/FDX2/CYBA/GLDC	34
GO:0016239	positive regulation of macroautophagy	19/2107	79/18888	0.240506	2.156	3.64831	0.000894097	0.0234868	0.0202825	OPTN/PINK1/SESN2/UVRAG/PIP4K2B/SESN1/CALCOCO2/AMBRA1/FBXO7/LRSAM1/HIF1A/RALB/SNX4/ATG2A/RIPK2/SNX18/PIP4K2A/LARP1/HTT	19
GO:0035304	regulation of protein dephosphorylation	19/2107	79/18888	0.240506	2.156	3.64831	0.000894097	0.0234868	0.0202825	ARPP19/CALM2/PINK1/YWHAE/PPP4R4/NSMF/PPP1R7/ANKLE2/PPP6R3/CRY2/HSP90B1/AMBRA1/NUAK1/NCK2/PDGFRB/NCK1/PPP1R16B/IKBKB/HTT	19
GO:0031589	cell-substrate adhesion	60/2107	359/18888	0.167131	1.49823	3.37719	0.000898606	0.0235017	0.0202954	SPOCK2/SFRP1/ARHGEF7/GPM6B/CLASP2/FZD7/CASK/ARPC2/ACTG1/EDIL3/ATP1B2/SPOCK1/L1CAM/RAC1/MAP4K4/PRKX/ZYX/CIB1/MINK1/VCAM1/NF2/PTPRA/CSPG5/PTPRO/NTN4/RAC3/PREX1/PTPRK/NRP1/COL3A1/ADAM15/RSU1/CDH11/CCN2/FLNA/PARVA/PRKCE/JAM3/DUSP22/THY1/PDPN/ACTN1/RADIL/COL26A1/TRPM7/RCC2/ONECUT1/FER/AJAP1/DOCK5/WNT4/FAM107A/SORBS1/PTK2B/WHAMM/EPDR1/FERMT2/FBLN5/BCR/ITGA3	60
GO:0018209	peptidyl-serine modification	51/2107	294/18888	0.173469	1.55505	3.39879	0.000911468	0.0237129	0.0204778	ATP2B4/PDK3/CAMKV/HIPK3/AKT1/PRKACB/APP/GALNT13/PINK1/PRKCA/GRK2/PRKX/MAPK1/CSNK1D/MAPK8/NTRK2/CAMK2A/SNCA/PKN1/BAX/MAPK14/MAPK12/GALNT16/CAMK2D/TGFBR1/PRKCI/RASSF2/PAQR3/STK32A/DYRK2/NTRK3/SPTBN4/ULK2/SH2D3C/SRPK2/SRPK1/PRKD1/GSK3A/PRKCE/BAK1/CAMK1/MAPKAPK3/NCK1/RIPK2/CAMK1G/INPP5K/ERN1/GPD1L/MAP4K1/VRK1/IKBKB	51
GO:0043524	negative regulation of neuron apoptotic process	32/2107	162/18888	0.197531	1.77075	3.49101	0.000914635	0.0237129	0.0204778	CHL1/BCL2L1/CLU/PINK1/NRBP2/FAIM2/NTRK2/SNCA/BAX/BTG2/CLN8/SOD2/NRP1/ZPR1/PRKCI/AMBRA1/SLC25A27/SYNGAP1/FBXO7/DLX1/WFS1/HIF1A/THAP11/PLXND1/PYCR1/NPPC/HYOU1/UNC5B/PTK2B/GCLM/ADAM8/RETREG1	32
GO:0034205	amyloid-beta formation	15/2107	56/18888	0.267857	2.40118	3.72087	0.000933897	0.0238722	0.0206153	CLU/SPON1/PRNP/APOE/BIN1/RTN1/ABCA2/CASP3/NTRK2/BACE1/PICALM/GSK3A/PSEN2/SLC2A13/LRRTM3	15
GO:0031400	negative regulation of protein modification process	69/2107	426/18888	0.161972	1.45198	3.34342	0.000934928	0.0238722	0.0206153	GNAQ/UCHL1/SFRP1/PRNP/CDKN1A/ATP2B4/CADM1/SQSTM1/CAMK2N1/SPAG9/SIRT2/APOE/HIPK3/AKT1/ARPP19/PAX6/CALM2/YWHAE/CAMK2N2/DNAJC10/CIB1/CRTAP/NF2/PPP4R4/PLAA/PRKAR2A/LIMK1/SNCA/PKN1/BAX/PTPRO/DNAJC3/PPM1E/CRY2/ARRB2/DVL1/MEN1/GTPBP4/RASSF2/GPS2/PAQR3/NTRK3/INSM1/PRMT3/ARRB1/MAD2L1/NCK2/PRKCE/DUSP22/THY1/MICAL1/BAK1/DTNBP1/CEP85/NCOA7/NCK1/PPP1R16B/CDYL/SNTA1/UBASH3B/INPP5K/PIP5KL1/IPO5/ISG15/GPD1L/MINA…	69
GO:0062237	protein localization to postsynapse	13/2107	45/18888	0.288889	2.58972	3.78317	0.000935263	0.0238722	0.0206153	NSG1/SCRIB/ERBB4/CACNG7/LGI1/SNAP25/ZDHHC2/GRIP2/IQSEC2/GRIP1/NETO2/ARHGAP44/ADAM10	13
GO:0043161	proteasome-mediated ubiquitin-dependent protein catabolic process	64/2107	389/18888	0.164524	1.47486	3.35331	0.000937485	0.0238722	0.0206153	PSMD10/USP9X/UCHL1/CLU/PSMD3/DTX4/GABARAP/PSMF1/SIRT2/AKT1/PSMB2/RMND5A/PSMD1/ZYG11B/CUL3/CDC34/CSNK1D/PLAA/BAG6/TRPC4AP/BBS7/TBL1X/PSMA3/KBTBD6/ARRB2/DVL1/CUL1/HECTD1/PSMC1/AMBRA1/PSMD11/PPP2CB/SIAH2/PSMB10/FBXL20/FBXO7/FBXO31/ANAPC4/BTRC/ARRB1/GSK3A/RNF180/NKD2/KEAP1/FBXW7/GIPC1/KLHDC3/CHFR/ANKRD9/FBXW4/PLK3/TRIM26/WWP1/PSMD2/ITCH/USP38/FBXW5/KLHDC1/ANAPC7/USP25/PRICKLE1/FBXO45/PSMB3/TRIB1	64
GO:0001508	action potential	30/2107	149/18888	0.201342	1.80491	3.49522	0.000943795	0.0238722	0.0206153	ATP1B1/GNAQ/CNR1/BIN1/YWHAE/CACNA2D1/NTRK2/FGF13/CAMK2D/CACNB2/CACNA1I/KCND3/FLNA/ATP1A1/KCNJ3/KCNC2/SCN9A/CACNB4/KCNB1/DSG2/HCN2/HCN4/KCNIP2/SNTA1/KCNAB2/GJD2/CACNA1C/GPD1L/SCN8A/KCNA2	30
GO:0098739	import across plasma membrane	38/2107	203/18888	0.187192	1.67807	3.44174	0.000944799	0.0238722	0.0206153	ATP1B1/ATP1A3/PRNP/ATP2B4/LRP2/AKT1/SLC7A11/SLC7A5/SLC6A9/SLC1A4/SLC3A2/ATP1B2/SLC1A2/CACNA2D1/CACNA1H/SLC1A3/SLC39A6/IRS2/CLN8/SLC5A3/SLC1A5/LRRC8B/PPP3CC/CACNA1I/SLC2A3/ATP1A1/KCNJ3/SLC7A1/SLC1A6/TRPV1/ARL6IP1/SLC12A6/HCN2/HCN4/SLC7A3/CACNA1C/KCNJ4/KCNJ6	38
GO:0032984	protein-containing complex disassembly	45/2107	252/18888	0.178571	1.60079	3.40211	0.00096313	0.0242225	0.0209179	TMOD2/DDIT4/STMN2/STMN4/MAP1LC3B/MAP1LC3A/MAP1B/CLASP2/GABARAP/HSPA8/CHMP5/NAPA/CIB1/STMN3/PPP1R9B/SPTBN1/UVRAG/CLEC16A/CALCOCO2/FGF13/ARHGEF2/UPF1/LAMP2/SH3GL3/OGFOD1/SPTBN4/TMOD3/MYC/VTA1/PEX5/MICAL1/TPX2/ADD3/GSPT1/SPTBN2/EPS8/SPTAN1/MID1/PEX14/INSR/STX17/KLC1/NAV3/WDR1/IGF1R	45
GO:0045333	cellular respiration	44/2107	245/18888	0.179592	1.60993	3.40497	0.000966789	0.0242225	0.0209179	ATP5F1B/TRAP1/ATP5MG/NDUFA4/COX6A1/COX4I1/GHITM/UQCRB/MDH2/PINK1/DGUOK/ATP5F1C/NDUFA7/NDUFB5/SLC25A23/NDUFC1/SHMT2/COX7A2/COX5B/NDUFS8/SNCA/NIPSNAP2/SUCLG1/NDUFA6/SOD2/COX6B1/IDH3A/UQCRC2/SLC25A13/SDHA/SDHB/SDHAF4/IDH1/NDUFB4/SLC25A33/CAT/ATP5PD/HIF1A/BID/IDH3B/OGDHL/FH/FXN/IFNAR1	44
GO:0034349	glial cell apoptotic process	7/2107	16/18888	0.4375	3.92193	4.1431	0.000976477	0.0243629	0.0210391	PRKCA/CASP3/TNFRSF21/CASP9/AKAP12/PRKCI/TRAF2	7
GO:1903532	positive regulation of secretion by cell	50/2107	288/18888	0.173611	1.55632	3.37108	0.000998532	0.0248094	0.0214246	NKX6-1/CLASP2/RAB3A/WLS/FRMD4A/ACSL4/PINK1/GRK2/GABBR1/CADPS/RAB7A/PPID/PLCB1/SNCA/TMEM132A/SELENOT/IRS2/GAB2/SNAP25/GLUD1/GALR1/SYT7/GPR27/STX1A/HGS/RASL10B/MPC2/DYNLL1/CDK5R2/PRKD1/AIMP1/PCK2/MCU/C2CD2L/PRKCE/RAB15/HIF1A/VAMP7/DTNBP1/NLGN1/SNX4/KCNB1/STAM/NADK/INHBB/BAD/TRH/RAB27B/SYT10/ADAM8	50
GO:1903241	U2-type prespliceosome assembly	9/2107	25/18888	0.36	3.22719	3.94844	0.00101269	0.0250568	0.0216383	SF3B3/SF3A2/SF3B2/SF3B5/SNRPA1/SF3B6/HTATSF1/SF3A1/RBMX2	9
GO:0030307	positive regulation of cell growth	32/2107	163/18888	0.196319	1.75988	3.45251	0.00101879	0.0251034	0.0216785	PSMD10/SFRP1/MAP1B/RNF157/SHTN1/AKT1/CACNG7/L1CAM/MEGF8/RND2/CIB1/DDX3X/PLAA/SLC23A2/LIMK1/LGI1/DDX49/NRP1/TGFBR1/CYFIP1/CDH4/CDKN2AIP/BRAT1/SLC25A33/CPNE6/SYT17/SEMA7A/ADAM10/PTK2B/TAF9B/FXN/RIMS1	32
GO:0042987	amyloid precursor protein catabolic process	17/2107	68/18888	0.25	2.2411	3.63293	0.00103063	0.0252908	0.0218404	CLU/SPON1/PRNP/APOE/BIN1/RTN1/ABCA2/CASP3/NTRK2/BACE1/DHCR24/PICALM/GSK3A/PSEN2/SLC2A13/ADAM10/LRRTM3	17
GO:0048678	response to axon injury	20/2107	86/18888	0.232558	2.08475	3.57256	0.00104211	0.0254676	0.0219931	MAP1B/CTNNA1/NEO1/FLRT3/MAPK8IP3/MORN4/MAP2K1/CSPG5/BAX/RTN4R/SOD2/PTN/RANGAP1/TNR/STK24/FLNA/KCNB1/NPPC/KREMEN1/IGF1R	20
GO:1904377	positive regulation of protein localization to cell periphery	18/2107	74/18888	0.243243	2.18053	3.60543	0.00104917	0.0255354	0.0220517	PRNP/ATP2B4/SQSTM1/AKT1/CIB1/PPP1R9B/SPTBN1/SNCA/ZDHHC2/PRKCI/PTPN9/GNAI1/PRKCE/EZR/NKD2/SORBS1/EFCAB7/ITGA3	18
GO:0006816	calcium ion transport	69/2107	428/18888	0.161215	1.4452	3.30113	0.00106138	0.0257277	0.0222177	ATP1B1/EDNRB/GPM6A/PRNP/ATP2B4/SARAF/PLP1/CASK/GHITM/CALM2/SLC3A2/CACNG7/CACNG4/BIN1/SMDT1/GNAI2/ADCYAP1R1/YWHAE/CACNA2D1/CACNA1H/SLC25A23/CHERP/CAMK2A/TRPC4AP/PLCB1/SNCA/BAX/NIPSNAP2/CDH23/CAMK2G/MCUR1/NALCN/CAMK2D/RYR3/ASIC1/HOMER2/SELENOK/CACNB2/HPCA/GRIN2B/PPP3CC/CACNA1I/ATP2B2/FLNA/PRKD1/MCU/PRKCE/THY1/WFS1/BAK1/RAMP1/PDGFRB/TRPV1/TRPM7/PSEN2/CACNB4/ANO6/PLCD1/TPCN1/CYBA/UBASH3B/INPP5K/PTK2B…	69
GO:0099505	regulation of presynaptic membrane potential	10/2107	30/18888	0.333333	2.98813	3.86157	0.00106847	0.0257947	0.0222755	GABRA2/GABBR1/GABRB1/GRIN2B/KCNJ3/KCNC2/GRIA4/GRIA3/KCNA2/GABRA5	10
GO:0043200	response to amino acid	26/2107	124/18888	0.209677	1.87963	3.48221	0.0010807	0.0258803	0.0223494	BCL2L1/SLC7A5/LAMTOR2/CUL3/SLC1A2/SESN2/EIF2S1/TOMM70/XBP1/ASS1/CASP3/NTRK2/BAIAP2/PPP1R9B/CAPN2/NSMF/SESN1/COL3A1/HPCA/CPEB3/HSF1/KCNB1/GCLM/IPO5/CPEB1/IGF1R	26
GO:0043244	regulation of protein-containing complex disassembly	26/2107	124/18888	0.209677	1.87963	3.48221	0.0010807	0.0258803	0.0223494	TMOD2/STMN2/MAP1B/CLASP2/CIB1/SPTBN1/UVRAG/CLEC16A/CALCOCO2/FGF13/ARHGEF2/UPF1/OGFOD1/SPTBN4/TMOD3/TPX2/ADD3/GSPT1/SPTBN2/EPS8/SPTAN1/MID1/INSR/NAV3/WDR1/IGF1R	26
GO:0018105	peptidyl-serine phosphorylation	49/2107	282/18888	0.173759	1.55764	3.34319	0.00109393	0.0260924	0.0225327	ATP2B4/PDK3/CAMKV/HIPK3/AKT1/PRKACB/APP/PINK1/PRKCA/GRK2/PRKX/MAPK1/CSNK1D/MAPK8/NTRK2/CAMK2A/SNCA/PKN1/BAX/MAPK14/MAPK12/CAMK2D/TGFBR1/PRKCI/RASSF2/PAQR3/STK32A/DYRK2/NTRK3/SPTBN4/ULK2/SH2D3C/SRPK2/SRPK1/PRKD1/GSK3A/PRKCE/BAK1/CAMK1/MAPKAPK3/NCK1/RIPK2/CAMK1G/INPP5K/ERN1/GPD1L/MAP4K1/VRK1/IKBKB	49
GO:0045732	positive regulation of protein catabolic process	38/2107	205/18888	0.185366	1.66169	3.37533	0.00114099	0.0271064	0.0234083	PSMD10/CLU/HSP90AA1/LRP2/OAZ1/GABARAP/NRDC/SIRT2/APOE/AKT1/MSN/ZYG11B/ABCA2/LPCAT1/CSNK1D/BAG6/RAB7A/HERPUD1/BBS7/DVL1/HECTD1/PSMC1/CD81/SOX9/GSK3A/WFS1/RNF180/EZR/NKD2/KEAP1/FBXW7/CHFR/SNX9/PLK3/ITCH/PRICKLE1/ADAM8/TRIB1	38
GO:0031647	regulation of protein stability	55/2107	326/18888	0.168712	1.5124	3.30682	0.00115126	0.0271343	0.0234324	USP9X/ATP1B1/GNAQ/HSPD1/CLU/PRNP/GOLGA7/HSP90AA1/TOMM7/PINK1/ATP1B2/HSPA8/CUL3/MAPK1/CCT4/APTX/PRKRA/CRTAP/NF2/CASP3/B4GALT5/MAPK8IP3/BAG6/LSS/SNCA/PYURF/TBL1X/AAK1/USP36/NAA15/DVL1/LAMP2/PEX6/CD81/GTPBP4/RASSF2/HIP1R/CDKN2AIP/CRYAB/FBXO7/BAG1/FLNA/PARVA/BTRC/WFS1/KAT2A/FBXW7/GIPC1/CHFR/FAM107A/TAF9B/HTT/USP25/PINX1/ISOC2	55
GO:0055074	calcium ion homeostasis	55/2107	326/18888	0.168712	1.5124	3.30682	0.00115126	0.0271343	0.0234324	ATP1B1/ATP2B4/CNR1/GRINA/APOE/CALB2/APP/GHITM/CALM2/TMTC2/SMDT1/YWHAE/SLC25A23/CHERP/PLCB1/SNCA/BAX/CDH23/HERPUD1/MCUR1/HSP90B1/CAMK2D/RYR3/SNX10/ANKH/SELENOK/TSPOAP1/SLC25A27/CACNB2/ATP7B/ATP2B2/FLNA/PRKD1/PDZD8/GPR12/MCU/PRKCE/THY1/WFS1/BAK1/CIB2/CACNB4/TMEM203/NPPC/PLCD1/CYBA/UBASH3B/PTK2B/SLC24A3/PLCB3/STIM1/CACNA1C/SCGN/HTT/RYR1	55
GO:0005978	glycogen biosynthetic process	13/2107	46/18888	0.282609	2.53342	3.68961	0.00117234	0.0274145	0.0236743	AKT1/GYG2/IRS2/DYRK2/GYG1/GSK3A/INSR/PASK/INPP5K/SORBS1/ACADM/PGM2/PPP1R3D	13
GO:0009250	glucan biosynthetic process	13/2107	46/18888	0.282609	2.53342	3.68961	0.00117234	0.0274145	0.0236743	AKT1/GYG2/IRS2/DYRK2/GYG1/GSK3A/INSR/PASK/INPP5K/SORBS1/ACADM/PGM2/PPP1R3D	13
GO:0070588	calcium ion transmembrane transport	56/2107	334/18888	0.167665	1.50301	3.28654	0.00121149	0.0282191	0.0243692	ATP1B1/EDNRB/GPM6A/PRNP/ATP2B4/PLP1/GHITM/CALM2/CACNG7/CACNG4/BIN1/SMDT1/ADCYAP1R1/YWHAE/CACNA2D1/CACNA1H/SLC25A23/CHERP/TRPC4AP/PLCB1/SNCA/BAX/NIPSNAP2/MCUR1/NALCN/CAMK2D/RYR3/ASIC1/CACNB2/HPCA/GRIN2B/PPP3CC/CACNA1I/ATP2B2/FLNA/PRKD1/MCU/PRKCE/THY1/BAK1/TRPV1/TRPM7/PSEN2/CACNB4/ANO6/PLCD1/TPCN1/CYBA/UBASH3B/PTK2B/SLC24A3/PLCB3/STIM1/CACNA1C/HTT/RYR1	56
GO:0050767	regulation of neurogenesis	64/2107	393/18888	0.16285	1.45985	3.26432	0.00122093	0.0283285	0.0244637	NKX6-2/NKX6-1/EFNB3/DLX2/DPYSL5/MAP1B/LRP2/SHTN1/SOX8/PARP6/NRDC/SIRT2/PAX6/NKX2-2/SLC7A5/CTNNA1/BIN1/METRN/L1CAM/CAPRIN1/ID2/MEGF8/RND2/PTPRD/NF2/NTRK2/BAIAP2/LIMK1/MAP2K1/BTG2/RTN4R/SEMA6C/CAPRIN2/FGF13/ANKRD27/NRP1/SERPINE2/PRKCI/BRINP1/SEMA4F/CYFIP1/PTN/HEY1/SYNGAP1/CDH4/GORASP1/ROBO2/STAU2/RASSF10/WNT7A/ULK2/TNR/DLX1/THY1/PLXNC1/HIF1A/PLXND1/SS18L1/TENM4/ASCL1/SEMA7A/B2M/TIAM2/ZNF365	64
GO:0061077	chaperone-mediated protein folding	18/2107	75/18888	0.24	2.15146	3.54042	0.00123896	0.0286354	0.0247287	CLU/TRAP1/DNAJB1/HSPA8/CCT4/CRTAP/PPID/ST13/HSPA14/DNAJB5/PDCD5/BAG1/UNC45A/PDIA4/SDF2L1/DNAJB6/HSPH1/DNAJB14	18
GO:0098780	response to mitochondrial depolarisation	8/2107	21/18888	0.380952	3.41501	3.92358	0.0012619	0.0290528	0.0250892	SQSTM1/OPTN/TOMM7/PINK1/AMBRA1/GPS2/HUWE1/VPS13C	8
GO:0010959	regulation of metal ion transport	64/2107	394/18888	0.162437	1.45615	3.24222	0.00130271	0.0298771	0.025801	ATP1B1/PRNP/ATP2B4/SARAF/PLP1/CNTN1/CASK/AKT1/CALM2/AHCYL1/WNK2/ATP1B2/BIN1/VAMP2/GNAI2/ADCYAP1R1/GNB2/YWHAE/CACNA2D1/FXYD6/PER1/CAMK2A/SNCA/BAX/NKAIN4/NIPSNAP2/CAMK2G/FGF14/FGF13/CAMK2D/SERPINE2/HOMER2/CACNB2/HPCA/SPTBN4/PPP3CC/FLNA/PRKD1/ATP1A1/KCNC2/PRKCE/THY1/WFS1/BAK1/PDGFRB/PSEN2/RGS7/CACNB4/KCNIP1/ANO6/KCNIP2/B2M/SNTA1/CYBA/KCNAB2/UBASH3B/INPP5K/PTK2B/HECW1/STIM1/HECW2/CACNA1C/GPD1L/HTT	64
GO:0019935	cyclic-nucleotide-mediated signaling	22/2107	100/18888	0.22	1.97217	3.45387	0.00131746	0.0300996	0.0259931	EDNRB/ADCY2/APOE/ADCYAP1R1/CDC34/RUNDC3A/MGRN1/KSR1/PDE1A/GUCY1B1/CAP2/SOX9/PDE9A/GNAI1/KCNC2/ADCY1/PRKG1/NPPC/RASD2/PDE1B/PDE4A/GUCY1A2	22
GO:0071248	cellular response to metal ion	37/2107	200/18888	0.185	1.65841	3.31694	0.00136394	0.0310427	0.0268076	CPNE1/PRNP/MAP1LC3A/AKT1/JUND/CACNA1H/MAPK1/EIF2S1/SLC25A23/JUN/MAPK8/CPNE2/SNCA/CLIC4/HSP90B1/BACE1/CAMK2D/RYR3/SYT7/HPCA/MEF2A/GSK3A/KCNK3/ADCY1/CPNE6/SYT17/TIGAR/SYT9/HSF1/CPNE7/NLGN1/KCNB1/B2M/INHBB/RASGRP2/SYT10/RYR1	37
GO:0007035	vacuolar acidification	11/2107	36/18888	0.305556	2.73912	3.7009	0.00137372	0.0311463	0.0268971	ATP6V1A/ATP6V0C/ATP6AP1/CLIC4/ATP6V0E2/ATP6AP2/LAMP2/ATP6V1F/ATP6V0B/TMEM106B/ATP6V1H	11
GO:0009065	glutamine family amino acid catabolic process	9/2107	26/18888	0.346154	3.10306	3.80233	0.00139696	0.0311987	0.0269423	ATP2B4/GOT2/GAD1/DDAH1/GLUD1/GLS/GAD2/GLS2/ADHFE1	9
GO:0022010	central nervous system myelination	9/2107	26/18888	0.346154	3.10306	3.80233	0.00139696	0.0311987	0.0269423	NKX6-2/CLU/GPM6B/PLP1/CNTN1/ABCA2/B4GALT5/MIOS/TENM4	9
GO:0032291	axon ensheathment in central nervous system	9/2107	26/18888	0.346154	3.10306	3.80233	0.00139696	0.0311987	0.0269423	NKX6-2/CLU/GPM6B/PLP1/CNTN1/ABCA2/B4GALT5/MIOS/TENM4	9
GO:1903421	regulation of synaptic vesicle recycling	9/2107	26/18888	0.346154	3.10306	3.80233	0.00139696	0.0311987	0.0269423	ACTG1/PLAA/SNCA/SYT7/CYFIP1/PPP3CC/NLGN1/SNX9/VAMP4	9
GO:0065002	intracellular protein transmembrane transport	10/2107	31/18888	0.322581	2.89174	3.73518	0.00142131	0.0316242	0.0273097	USP9X/SEC61A2/PEX6/PEX5/PEX26/TRAM1L1/PEX14/SEC61G/BCR/C2CD5	10
GO:0070936	protein K48-linked ubiquitination	19/2107	82/18888	0.231707	2.07712	3.46359	0.00144019	0.0318068	0.0274674	DTX4/GABARAP/CUL3/CDC34/RNF8/AMFR/NT5C2/UBE2D2/KBTBD6/ARIH2/CUL1/HACE1/UBE2E2/FBXO7/UBE2E1/UBE2T/BTRC/ITCH/FBXO45	19
GO:0140056	organelle localization by membrane tethering	19/2107	82/18888	0.231707	2.07712	3.46359	0.00144019	0.0318068	0.0274674	STX16/RAB3A/AHCYL1/CPLX2/VTI1B/CTBP2/STX7/SNAP25/STX6/EXOC2/RAB3IP/STX1A/PDZD8/RABEPK/RALB/PSEN2/KCNB1/SNPH/STX17	19
GO:0051235	maintenance of location	56/2107	337/18888	0.166172	1.48963	3.21372	0.00149535	0.0328576	0.0283749	PSMD10/FTH1/BSCL2/SQLE/APOE/AKT1/GHITM/CALM2/TMSB4X/PINK1/SLC25A23/CHERP/TMSB15B/PLCB1/UVRAG/SNCA/BAX/ALKBH7/CRY2/HSP90B1/MOSPD2/CAMK2D/RYR3/B4GALNT1/RANGAP1/NBL1/VPS13A/ABHD5/SOAT1/DZIP1/ATP7B/FLNA/PRKD1/PRKCE/THY1/NR1H3/ARL2BP/GM2A/LPL/FBXW7/SCARB1/PLCD1/ARHGAP21/CYBA/UBASH3B/VPS13C/INSIG1/OSBPL11/PTK2B/PLCB3/CACNA1C/NFKB1/PPARA/HTT/TTC39B/RYR1	56
GO:0071241	cellular response to inorganic substance	41/2107	229/18888	0.179039	1.60498	3.26377	0.00149879	0.0328576	0.0283749	CPNE1/PRNP/MAP1LC3A/AKT1/JUND/CACNA1H/MAPK1/EIF2S1/SLC25A23/JUN/MAPK8/CPNE2/SNCA/CLIC4/HSP90B1/BACE1/CAMK2D/RYR3/SYT7/GUCY1B1/HPCA/MEF2A/KCNC2/GSK3A/KCNK3/TRAF2/ADCY1/CPNE6/SYT17/TIGAR/SYT9/HSF1/CPNE7/NLGN1/KCNB1/B2M/BLM/INHBB/RASGRP2/SYT10/RYR1	41
GO:0031032	actomyosin structure organization	39/2107	215/18888	0.181395	1.6261	3.27161	0.00150438	0.0328594	0.0283764	TMOD2/SFRP1/CLASP2/PIK3R2/CDC42BPB/ACTG1/CUL3/ZEB2/RAC1/CD47/ZYX/EPB41L3/NF2/RHOC/FLNC/LIMK1/PPM1E/NRP1/TGFBR1/CNN2/RHPN2/FRMD3/MEF2A/TMOD3/CCN2/PRKD1/ARRB1/FRMD5/PDGFRB/F11R/TRPM7/WNT4/INPP5K/SORBS1/PTK2B/EPB41L4A/MKKS/FERMT2/WDR1	39
GO:0032388	positive regulation of intracellular transport	28/2107	140/18888	0.2	1.79288	3.33656	0.00152256	0.0331351	0.0286145	HSP90AA1/OAZ1/FEZ1/PIK3R2/DYNC1H1/MSN/VAMP2/YWHAE/MLC1/NF2/RIPOR1/CALY/PGAP1/MAPK14/ZPR1/ZDHHC2/CD81/MAVS/PDCD5/BORCS5/FLNA/PRKD1/EZR/CAMK1/PLK3/IPO5/EFCAB7/TMEM30A	28
GO:0045927	positive regulation of growth	45/2107	258/18888	0.174419	1.56356	3.22959	0.00157612	0.0341598	0.0294994	PSMD10/SFRP1/MAP1B/RNF157/SHTN1/AKT1/ARX/ERBB4/CACNG7/L1CAM/MEGF8/RND2/CIB1/DDX3X/PLAA/SLC23A2/LIMK1/PLCB1/LGI1/DDX49/MAPK14/NRP1/ZPR1/TGFBR1/CYFIP1/DIO3/CDH4/SPTBN4/CDKN2AIP/BRAT1/PEX5/SLC25A33/WFS1/CPNE6/EZR/SYT17/SEMA7A/INSR/RFTN1/ADAM10/PTK2B/TAF9B/MKKS/FXN/RIMS1	45
GO:0170039	proteinogenic amino acid metabolic process	29/2107	147/18888	0.197279	1.76849	3.31439	0.0015811	0.0341598	0.0294994	PSAT1/CTPS2/ATP2B4/SMS/GOT2/SLC7A11/GAD1/DDAH1/ASS1/SHMT2/NAT8L/CTPS1/PHGDH/GLUD1/SRR/SLC25A13/APIP/QDPR/GLS/CTH/GAD2/SERINC5/MTRR/GLS2/RIDA/PYCR1/ADHFE1/GCLM/GLDC	29
GO:0010038	response to metal ion	59/2107	360/18888	0.163889	1.46917	3.1847	0.00159047	0.0342381	0.029567	CPNE1/PRNP/MAP1LC3A/AKT1/CALM2/BSG/S100A16/AHCYL1/JUND/CACNA1H/MAPK1/EIF2S1/SLC25A23/JUN/MAPK8/ASS1/VCAM1/CASP3/CPNE2/SNCA/CLIC4/ENTPD6/CASP9/HSP90B1/BACE1/SOD2/CAMK2D/RYR3/SYT7/SLC25A13/PPP2CB/HPCA/MEF2A/ATP7B/KCNC2/GSK3A/KCNK3/CAT/ADCY1/CPNE6/HIF1A/SYT17/TIGAR/SYT9/HSF1/CPNE7/NLGN1/KCNB1/KCNIP2/B2M/INHBB/PTK2B/RASGRP2/STIM1/SYT10/FXN/CRIP1/ANXA11/RYR1	59
GO:0006814	sodium ion transport	43/2107	244/18888	0.17623	1.57979	3.23	0.00160878	0.0345078	0.0298	ATP1B1/EDNRB/ATP1A3/ATP2B4/CNTN1/AKT1/SLC6A9/SLC3A2/AHCYL1/WNK2/ATP1B2/FXYD6/PER1/SHROOM2/SLC23A2/NKAIN4/NALCN/FGF14/FGF13/CAMK2D/SERPINE2/ASIC1/SLC5A3/SLC6A15/SPTBN4/ATP1A1/PRKCE/SLC13A3/SCN9A/SLC6A17/HCN2/SLC41A3/HCN4/SLC4A10/ANO6/SLC4A5/TPCN1/SNTA1/SLC24A3/HECW1/HECW2/GPD1L/SCN8A	43
GO:0071364	cellular response to epidermal growth factor stimulus	12/2107	42/18888	0.285714	2.56126	3.58918	0.00161745	0.0345693	0.0298531	SYAP1/AKT1/ERBB4/BAIAP2/PPP1R9B/ZFP36L2/ZPR1/SOX9/DUSP22/INPP5K/NCL/ZFP36	12
GO:0006264	mitochondrial DNA replication	6/2107	13/18888	0.461538	4.13742	4.00964	0.00163703	0.034863	0.0301067	DNAJA3/ENDOG/RRM1/DNA2/TWNK/POLG2	6
GO:1905037	autophagosome organization	25/2107	121/18888	0.206612	1.85215	3.33208	0.00165709	0.0351093	0.0303193	MAP1LC3B/MAP1LC3A/ATG4A/GABARAP/FEZ1/PINK1/RAB7A/CTSD/TP53INP1/PIP4K2B/AMBRA1/EMC6/ULK2/ATG2B/EFNB1/TBC1D12/TRAF6/ATG4C/LRSAM1/RALB/SNX4/ATG2A/STX17/SNX18/PIP4K2A	25
GO:0051932	synaptic transmission, GABAergic	15/2107	59/18888	0.254237	2.27909	3.48672	0.00166263	0.0351093	0.0303193	CNR1/CLSTN3/GABRA2/GABBR1/GABRB3/NALCN/RAC3/PRKCE/PLCL1/GABBR2/GABRA4/NLGN1/GABRA3/CNTNAP4/GABRA5	15
GO:0006874	intracellular calcium ion homeostasis	51/2107	302/18888	0.168874	1.51386	3.18975	0.00166626	0.0351093	0.0303193	ATP1B1/ATP2B4/CNR1/GRINA/APOE/CALB2/APP/GHITM/CALM2/SMDT1/YWHAE/SLC25A23/CHERP/PLCB1/SNCA/BAX/CDH23/HERPUD1/MCUR1/HSP90B1/CAMK2D/RYR3/SELENOK/TSPOAP1/SLC25A27/CACNB2/ATP7B/ATP2B2/FLNA/PRKD1/PDZD8/GPR12/MCU/PRKCE/THY1/WFS1/BAK1/CACNB4/TMEM203/NPPC/PLCD1/CYBA/UBASH3B/PTK2B/SLC24A3/PLCB3/STIM1/CACNA1C/SCGN/HTT/RYR1	51
GO:0008203	cholesterol metabolic process	28/2107	141/18888	0.198582	1.78017	3.29485	0.00170183	0.0355895	0.0307341	NFE2L1/SQLE/APOE/APP/HMGCR/FDFT1/LSS/STARD3/CYP51A1/PIP4P1/CLN8/FDXR/ACADVL/NSDHL/DHCR24/SOAT1/SC5D/GNB3/CAT/HMGCS1/EPHX2/IDI1/SCARB1/MSMO1/INSIG1/OSBPL5/TTC39B/ABCG4	28
GO:0032436	positive regulation of proteasomal ubiquitin-dependent protein catabolic process	18/2107	77/18888	0.233766	2.09558	3.41339	0.00170696	0.0355895	0.0307341	PSMD10/CLU/GABARAP/SIRT2/AKT1/ZYG11B/CSNK1D/BBS7/DVL1/HECTD1/GSK3A/RNF180/NKD2/KEAP1/CHFR/PLK3/PRICKLE1/TRIB1	18
GO:0045921	positive regulation of exocytosis	18/2107	77/18888	0.233766	2.09558	3.41339	0.00170696	0.0355895	0.0307341	CLASP2/RAB3A/CADPS/RAB7A/SNCA/GAB2/SYT7/STX1A/HGS/CDK5R2/RAB15/VAMP7/NLGN1/SNX4/KCNB1/STAM/RAB27B/SYT10	18
GO:1901880	negative regulation of protein depolymerization	17/2107	71/18888	0.239437	2.14641	3.42924	0.00171876	0.0356973	0.0308272	TMOD2/STMN2/MAP1B/CLASP2/CIB1/SPTBN1/FGF13/ARHGEF2/SPTBN4/TMOD3/TPX2/ADD3/SPTBN2/EPS8/SPTAN1/MID1/NAV3	17
GO:0044772	mitotic cell cycle phase transition	71/2107	451/18888	0.157428	1.41125	3.13221	0.0017241	0.0356973	0.0308272	CCND2/CDKN1A/CLASP2/CDKN2D/MYO16/SIRT2/AKT1/ARPP19/APP/CALM2/CCNI/CUL3/LCMT1/PLRG1/ID2/CDC34/EIF4EBP1/DDX3X/CAMK2A/CDK14/PPP1R9B/EIF4E/PLCB1/ACVR1/SMC5/APPL1/ZFP36L2/DYNC1LI1/TRIAP1/CUL1/RINT1/CDC25A/AMBRA1/PPP2R2D/BCL7C/DPF3/UBE2E2/IK/TMOD3/PCID2/FBXO7/LSM10/MYC/FBXO31/TPRA1/ANAPC4/MAD2L1/LSM11/PPM1D/RRM1/GSPT1/MIIP/EPS8/BID/CHFR/RCC2/PHF8/CACNB4/HUS1/TPD52L1/PLK3/FOXN3/ATAD5/FAM107A/BLM/CDK2AP2…	71
GO:0046326	positive regulation of glucose import	11/2107	37/18888	0.297297	2.66509	3.59234	0.00176044	0.0358443	0.0309541	AKT1/ARPP19/SLC1A2/APPL1/IRS2/MAPK14/PRKCI/RHOQ/MEF2A/INSR/SORBS1	11
GO:0006109	regulation of carbohydrate metabolic process	34/2107	182/18888	0.186813	1.67467	3.24071	0.00176065	0.0358443	0.0309541	DDIT4/PDK3/AKT1/ARPP19/APP/SCARB2/ADCYAP1R1/LCMT1/SESN2/GIT1/SNCA/FOXK2/IRS2/DYRK2/NLN/GNB3/GSK3A/PRKCE/IGFBP4/HIF1A/KAT2A/TIGAR/PRKG1/INSR/STAT3/PASK/BAD/INPP5K/SORBS1/ACADM/PDK1/NFKB1/PPARA/PPP1R3D	34
GO:0035725	sodium ion transmembrane transport	34/2107	182/18888	0.186813	1.67467	3.24071	0.00176065	0.0358443	0.0309541	ATP1B1/ATP1A3/ATP2B4/SLC6A9/SLC3A2/WNK2/ATP1B2/FXYD6/SHROOM2/NALCN/FGF14/FGF13/CAMK2D/ASIC1/SLC5A3/SLC6A15/ATP1A1/PRKCE/SLC13A3/SCN9A/SLC6A17/HCN2/SLC41A3/HCN4/SLC4A10/ANO6/SLC4A5/TPCN1/SNTA1/SLC24A3/HECW1/HECW2/GPD1L/SCN8A	34
GO:0022037	metencephalon development	24/2107	115/18888	0.208696	1.87083	3.31911	0.00176107	0.0358443	0.0309541	NLGN4X/SEZ6/CNTN1/MYO16/SCRIB/PAX6/ATIC/FAIM2/SDF4/MAP2K1/B4GALT2/SERPINE2/CDK5R2/WNT7A/SPTBN2/HERC1/KAT2A/PRKG1/ASCL1/GRID2/TRNP1/ZNF365/NANOS1/IGF1R	24
GO:0060078	regulation of postsynaptic membrane potential	29/2107	148/18888	0.195946	1.75654	3.27403	0.00176126	0.0358443	0.0309541	NLGN4X/GABRA2/SEZ6/AKT1/APP/GABBR1/GRIA2/INSYN1/BAIAP2/SNCA/ARRB2/DVL1/GABRB1/STX1A/GRIN2B/WNT7A/GSK3A/TRPV1/GABRA4/NLGN1/GABRA3/RGS7BP/GRIA4/GRID2/PTK2B/GRIA3/KCNA2/RIMS1/GABRA5	29
GO:1902473	regulation of protein localization to synapse	8/2107	22/18888	0.363636	3.25978	3.75788	0.00179078	0.0362164	0.0312754	CLSTN3/ABHD17B/DVL1/WNT7A/IQSEC2/NETO2/ARHGAP44/ADAM10	8
GO:0046474	glycerophospholipid biosynthetic process	38/2107	210/18888	0.180952	1.62213	3.21241	0.00179484	0.0362164	0.0312754	PIK3R2/FAR1/PCYT1B/LPCAT1/MBOAT7/PI4KA/EFR3B/PTDSS1/CAPN2/UVRAG/PIP4K2B/PGAP1/FABP5/PEMT/LPCAT4/DGKD/PITPNM1/VAC14/CHPT1/SELENOI/MTMR6/ABHD5/PDGFA/PIGZ/INPP4A/DGKE/PITPNM2/PCYT2/PIGA/DGKZ/DHRS7B/INPP5K/SOCS7/PIP5KL1/PIGT/PIP4K2A/INPP1/PITPNM3	38
GO:1902003	regulation of amyloid-beta formation	13/2107	48/18888	0.270833	2.42786	3.5097	0.00179776	0.0362164	0.0312754	CLU/SPON1/PRNP/APOE/BIN1/RTN1/ABCA2/CASP3/NTRK2/PICALM/GSK3A/SLC2A13/LRRTM3	13
GO:1901800	positive regulation of proteasomal protein catabolic process	23/2107	109/18888	0.211009	1.89157	3.30779	0.0018656	0.0374565	0.0323464	PSMD10/CLU/GABARAP/SIRT2/AKT1/ZYG11B/CSNK1D/BAG6/HERPUD1/BBS7/DVL1/HECTD1/PSMC1/GSK3A/WFS1/RNF180/NKD2/KEAP1/FBXW7/CHFR/PLK3/PRICKLE1/TRIB1	23
GO:0007026	negative regulation of microtubule depolymerization	9/2107	27/18888	0.333333	2.98813	3.66311	0.00189027	0.0374841	0.0323702	STMN2/MAP1B/CLASP2/CIB1/FGF13/ARHGEF2/TPX2/MID1/NAV3	9
GO:0099560	synaptic membrane adhesion	9/2107	27/18888	0.333333	2.98813	3.66311	0.00189027	0.0374841	0.0323702	MDGA1/LRFN4/PTPRD/FLRT3/PCDH8/MAPK14/CDH10/NTNG1/ITGA3	9
GO:0050769	positive regulation of neurogenesis	43/2107	246/18888	0.174797	1.56695	3.17154	0.00189212	0.0374841	0.0323702	NKX6-2/NKX6-1/MAP1B/LRP2/SHTN1/SOX8/PARP6/NRDC/PAX6/NKX2-2/SLC7A5/BIN1/METRN/L1CAM/CAPRIN1/ID2/MEGF8/RND2/PTPRD/NTRK2/BAIAP2/LIMK1/MAP2K1/CAPRIN2/ANKRD27/NRP1/SERPINE2/PRKCI/CYFIP1/PTN/CDH4/ROBO2/STAU2/RASSF10/PLXNC1/HIF1A/PLXND1/SS18L1/TENM4/ASCL1/SEMA7A/TIAM2/ZNF365	43
GO:1901873	regulation of post-translational protein modification	43/2107	246/18888	0.174797	1.56695	3.17154	0.00189212	0.0374841	0.0323702	PSMD10/ARRDC3/HSP90AA1/SQSTM1/GABARAP/AKT1/PINK1/CUL3/ABCA2/DDX3X/CRTAP/PLAA/LIMK1/HERPUD1/ARRB2/TGFBR1/GTPBP4/GPS2/SIAH2/SEPTIN4/UBE2L3/PRMT3/BTRC/ARRB1/TRAF6/MAD2L1/GSK3A/PRKCE/WFS1/RNF180/HIF1A/FBXW7/CHFR/RIPK2/HUWE1/RASD2/FAM107A/ITCH/ISG15/SPRTN/MINAR1/PRICKLE1/PINX1	43
GO:0046165	alcohol biosynthetic process	28/2107	142/18888	0.197183	1.76763	3.25346	0.00189897	0.0374952	0.0323798	DKK3/APOE/ASAH1/HMGCR/ADCYAP1R1/CACNA1H/ABCA2/FDFT1/LSS/SNCA/CYP51A1/PCBD1/MOXD1/NSDHL/QDPR/DHCR24/SC5D/PCK2/HMGCS1/PRKG1/IDI1/MSMO1/WNT4/ACER3/INSIG1/PPIP5K1/NFKB1/ABCG4	28
GO:0099172	presynapse organization	14/2107	54/18888	0.259259	2.3241	3.45265	0.00191995	0.0375366	0.0324155	NLGN4X/EFNB3/CLSTN3/APP/MDGA1/LRFN4/PTPRD/SNCA/DVL1/CAP2/WNT7A/NLGN1/GRID2/LRRTM3	14
GO:0120009	intermembrane lipid transfer	14/2107	54/18888	0.259259	2.3241	3.45265	0.00191995	0.0375366	0.0324155	GRAMD1A/APOE/STARD3/ABCA3/TRIAP1/PITPNM1/ATG2B/PRELID3A/PLEKHA8/C2CD2L/PITPNM2/ATG2A/OSBPL5/PITPNM3	14
GO:1990928	response to amino acid starvation	14/2107	54/18888	0.259259	2.3241	3.45265	0.00191995	0.0375366	0.0324155	MAP1LC3A/CDKN1A/SESN2/MAPK1/EIF2A/EIF2S1/MAPK8/SESN1/SEH1L/PRKD1/MIOS/EIF2AK4/TFEB/LARP1	14
GO:0099175	regulation of postsynapse organization	22/2107	103/18888	0.213592	1.91473	3.29845	0.00196897	0.038172	0.0329643	PAK3/PRNP/APOE/AKT1/LRFN4/ABHD17B/CAPRIN1/PTPRD/BAIAP2/CAPRIN2/DVL1/GRIN2B/STAU2/WNT7A/LRRTM2/DTNBP1/KIF1A/NLGN1/ARHGAP44/GRID2/ADAM10/PTK2B	22
GO:0010827	regulation of glucose transmembrane transport	18/2107	78/18888	0.230769	2.06871	3.35133	0.00199197	0.038172	0.0329643	PEA15/AKT1/ARPP19/SLC1A2/FABP5/APPL1/IRS2/MAPK14/PRKCI/RHOQ/GRB10/SLC25A27/MEF2A/GSK3A/INSR/INPP5K/SORBS1/C2CD5	18
GO:0046323	glucose import	18/2107	78/18888	0.230769	2.06871	3.35133	0.00199197	0.038172	0.0329643	PEA15/AKT1/ARPP19/SLC1A2/SESN2/SORT1/APPL1/IRS2/MAPK14/PRKCI/RHOQ/GRB10/SLC25A27/MEF2A/SLC2A3/GSK3A/INSR/SORBS1	18
GO:0050772	positive regulation of axonogenesis	18/2107	78/18888	0.230769	2.06871	3.35133	0.00199197	0.038172	0.0329643	MAP1B/SHTN1/NRDC/METRN/L1CAM/MEGF8/RND2/NTRK2/LIMK1/MAP2K1/NRP1/CYFIP1/CDH4/ROBO2/PLXNC1/PLXND1/SEMA7A/TIAM2	18
GO:0046324	regulation of glucose import	15/2107	60/18888	0.25	2.2411	3.41182	0.0019921	0.038172	0.0329643	PEA15/AKT1/ARPP19/SLC1A2/APPL1/IRS2/MAPK14/PRKCI/RHOQ/GRB10/SLC25A27/MEF2A/GSK3A/INSR/SORBS1	15
GO:0009150	purine ribonucleotide metabolic process	70/2107	446/18888	0.156951	1.40697	3.08198	0.00200132	0.038172	0.0329643	DDIT4/ATP1B1/ATP5F1B/SLC25A1/ATP6V1A/PDK3/ATP5MG/ADCY2/NME2/NME1/CASK/ATP6V0C/APP/FAR1/ACOT7/TMSB4X/HMGCR/ACSL4/PINK1/HSPA8/GIT1/ATP5F1C/NDUFA7/NDUFB5/ATIC/NDUFC1/ATP5MC2/ACSBG1/NDUFS8/SNCA/FOXK2/PDHX/SUCLG1/ACAT1/NT5C2/NDUFA6/PDE1A/RHOQ/GUCY1B1/NUDT2/SLC25A13/MPC2/SDHA/NUDT7/PDE9A/SDHB/HACD2/NDUFB4/ADCY1/ATP5PD/HMGCS1/HIF1A/TIGAR/MPP1/AK1/CACNB4/ELOVL1/INSR/ADCY3/OGDHL/STAT3/NPPC/NADK/BAD/HSD17B…	70
GO:0050770	regulation of axonogenesis	30/2107	156/18888	0.192308	1.72392	3.21713	0.00200905	0.038172	0.0329643	PAK3/EFNB3/MAP1B/SHTN1/NRDC/METRN/L1CAM/MEGF8/RND2/NTRK2/LIMK1/MAP2K1/RTN4R/SEMA6C/FGF13/NRP1/SEMA4F/CYFIP1/SYNGAP1/CDH4/ROBO2/WNT7A/ULK2/TNR/UST/THY1/PLXNC1/PLXND1/SEMA7A/TIAM2	30
GO:0010822	positive regulation of mitochondrion organization	17/2107	72/18888	0.236111	2.1166	3.36359	0.00202042	0.038172	0.0329643	BBC3/PINK1/BAX/HIP1R/AMBRA1/FBXO7/PDCD5/MCU/ENDOG/GSK3A/BAK1/HIF1A/BID/BAD/BMF/ZDHHC6/HTT	17
GO:0043954	cellular component maintenance	17/2107	72/18888	0.236111	2.1166	3.36359	0.00202042	0.038172	0.0329643	PRNP/RAB3A/APOE/ABHD17B/SORT1/SDF4/APPL1/MTSS1/CTBP2/SYNGAP1/GRIN2B/NLGN1/INSR/TPRN/FERMT2/ITGA3/IGF1R	17
GO:0051047	positive regulation of secretion	52/2107	312/18888	0.166667	1.49407	3.11812	0.00202083	0.038172	0.0329643	NKX6-1/CLASP2/RAB3A/WLS/FRMD4A/ACSL4/PINK1/GRK2/GABBR1/CADPS/XBP1/RAB7A/PPID/PLCB1/SNCA/TMEM132A/SELENOT/IRS2/GAB2/SNAP25/GLUD1/GALR1/SYT7/GPR27/STX1A/HGS/RASL10B/MPC2/DYNLL1/CDK5R2/PRKD1/AIMP1/PCK2/MCU/C2CD2L/PRKCE/RAB15/HIF1A/VAMP7/DTNBP1/NLGN1/SNX4/KCNB1/STAM/NADK/INHBB/BAD/CYBA/TRH/RAB27B/SYT10/ADAM8	52
GO:0000271	polysaccharide biosynthetic process	16/2107	66/18888	0.242424	2.17319	3.38308	0.00202287	0.038172	0.0329643	AKT1/FUT9/GYG2/EXT2/IRS2/DYRK2/GYG1/GSK3A/INSR/PASK/INPP5K/SORBS1/ACADM/NFKB1/PGM2/PPP1R3D	16
GO:0007041	lysosomal transport	27/2107	136/18888	0.198529	1.7797	3.23353	0.00204466	0.0384615	0.0332142	CLU/RHOB/CACNG7/PINK1/CACNG4/BIN1/SCARB2/HSPA8/CHMP5/MGRN1/SORT1/GPRASP1/RAB7A/AP3M1/CLEC16A/PXK/VPS53/LAMP2/ZFYVE16/HGS/VAMP7/NCOA4/VPS52/TMEM106B/HMGXB4/HOOK1/HOOK2	27
GO:0043269	regulation of monoatomic ion transport	73/2107	470/18888	0.155319	1.39234	3.0521	0.00214823	0.0402828	0.034787	ATP1B1/PRNP/ATP2B4/CNR1/SARAF/NDUFA4/PLP1/CNTN1/CASK/AKT1/CALM2/SLC6A9/TMSB4X/AHCYL1/WNK2/ATP1B2/BIN1/VAMP2/GNAI2/ADCYAP1R1/GNB2/YWHAE/CACNA2D1/FXYD6/PER1/CAMK2A/SNCA/BAX/NKAIN4/NIPSNAP2/CAMK2G/FGF14/PXK/FGF13/CAMK2D/SERPINE2/HOMER2/CACNB2/HPCA/SPTBN4/GRIN2B/PPP3CC/FLNA/PRKD1/ATP1A1/KCNJ3/KCNC2/PRKCE/THY1/WFS1/BAK1/PDGFRB/PSEN2/RGS7/CACNB4/KCNIP1/ANO6/KCNIP2/B2M/SNTA1/CYBA/KCNAB2/UBASH3B/INPP5K/P…	73
GO:0099054	presynapse assembly	13/2107	49/18888	0.265306	2.37831	3.42311	0.00220108	0.0411442	0.035531	NLGN4X/EFNB3/CLSTN3/APP/MDGA1/LRFN4/PTPRD/SNCA/DVL1/WNT7A/NLGN1/GRID2/LRRTM3	13
GO:0044743	protein transmembrane import into intracellular organelle	11/2107	38/18888	0.289474	2.59496	3.48731	0.00223147	0.041582	0.035909	USP9X/HSPD1/TOMM7/TOMM40/TOMM70/PAM16/PEX6/TIMM23/PEX5/PEX26/PEX14	11
GO:0051261	protein depolymerization	24/2107	117/18888	0.205128	1.83885	3.22507	0.0022448	0.0417001	0.036011	TMOD2/STMN2/STMN4/MAP1B/CLASP2/HSPA8/CIB1/STMN3/PPP1R9B/SPTBN1/FGF13/ARHGEF2/SH3GL3/SPTBN4/TMOD3/MICAL1/TPX2/ADD3/SPTBN2/EPS8/SPTAN1/MID1/NAV3/WDR1	24
GO:0045862	positive regulation of proteolysis	55/2107	336/18888	0.16369	1.46739	3.06307	0.00230368	0.0426609	0.0368408	PSMD10/HSPD1/CLU/SPON1/BBC3/GABARAP/NRDC/SIRT2/APOE/MTCH1/AKT1/PINK1/ZYG11B/CYFIP2/CSNK1D/DDX3X/CTSL/BAG6/CTSD/SNCA/BAX/HERPUD1/CASP9/BBS7/MAPK12/DVL1/HECTD1/PSMC1/IFT57/HIP1R/GRIN2B/PICALM/PDCD5/MYC/BTRC/GSK3A/AURKAIP1/WFS1/BAK1/RNF180/NKD2/KEAP1/FBXW7/BID/CHFR/RIPK2/SNX9/PLK3/STAT3/BAD/PTK2B/F3/PRICKLE1/ADAM8/TRIB1	55
GO:0021953	central nervous system neuron differentiation	33/2107	178/18888	0.185393	1.66194	3.1441	0.00231693	0.0427735	0.0369379	NKX6-1/DLX2/PAX6/NKX2-2/MDGA1/ARX/DCLK1/SPOCK1/FAIM2/NTRK2/B4GALT5/TBR1/BTG2/TOX/RAC3/CLN8/NRP1/BRINP1/GABRB1/SPTBN4/SCYL1/MDGA2/WNT7A/CDH11/PEX5/DLX1/HERC1/ASCL1/SLC4A10/GRID2/B2M/NPY/FBXO45	33
GO:0034764	positive regulation of transmembrane transport	38/2107	213/18888	0.178404	1.59928	3.11671	0.00232657	0.042819	0.0369772	ATP1B1/NDUFA4/PLP1/AKT1/ARPP19/SLC7A5/CALM2/TMSB4X/WNK2/ATP1B2/SLC1A2/ADCYAP1R1/CACNA2D1/SNCA/BAX/APPL1/NIPSNAP2/IRS2/FGF13/MAPK14/PRKCI/RHOQ/CACNB2/MEF2A/PPP3CC/FLNA/KCNC2/THY1/BAK1/ARL6IP1/RGS7/INSR/ANO6/KCNIP2/SORBS1/STIM1/C2CD5/HTT	38
GO:0006836	neurotransmitter transport	37/2107	206/18888	0.179612	1.61011	3.11987	0.00233618	0.0428635	0.0370157	GPM6B/CASK/RAB3A/SCRIB/SLC6A9/VAMP2/SLC1A2/GIT1/NAPA/CADPS/SLC1A3/CPLX2/CAMK2A/SNCA/CSPG5/RIMS3/CTBP2/CLN8/SNAP25/DVL1/SYT7/ASIC1/SLC6A15/STX1A/WNT7A/FBXL20/SYN2/SLC1A6/SYT9/DTNBP1/NLGN1/CACNB4/SLC6A17/SNPH/ICA1/RIMS1/FBXO45	37
GO:0007269	neurotransmitter secretion	28/2107	144/18888	0.194444	1.74308	3.17168	0.00235261	0.0429009	0.037048	CASK/RAB3A/SCRIB/VAMP2/GIT1/NAPA/CADPS/CPLX2/CAMK2A/SNCA/CSPG5/RIMS3/CTBP2/SNAP25/DVL1/SYT7/ASIC1/STX1A/WNT7A/FBXL20/SYN2/SYT9/DTNBP1/NLGN1/CACNB4/SNPH/RIMS1/FBXO45	28
GO:0099643	signal release from synapse	28/2107	144/18888	0.194444	1.74308	3.17168	0.00235261	0.0429009	0.037048	CASK/RAB3A/SCRIB/VAMP2/GIT1/NAPA/CADPS/CPLX2/CAMK2A/SNCA/CSPG5/RIMS3/CTBP2/SNAP25/DVL1/SYT7/ASIC1/STX1A/WNT7A/FBXL20/SYN2/SYT9/DTNBP1/NLGN1/CACNB4/SNPH/RIMS1/FBXO45	28
GO:1901524	regulation of mitophagy	10/2107	33/18888	0.30303	2.71649	3.49695	0.00240964	0.043807	0.0378305	PINK1/USP36/AMBRA1/FBXO7/GSK3A/HIF1A/TIGAR/FBXW7/VPS13C/HTT	10
GO:0072329	monocarboxylic acid catabolic process	26/2107	131/18888	0.198473	1.77919	3.17106	0.00245767	0.0445443	0.0384671	CNR1/AKT1/IDS/PCCA/ACOT7/SESN2/DCXR/CRYL1/ACAT1/IRS2/ACADVL/ACAT2/NUDT7/ACAA1/PCK2/PEX5/SORD/PHYH/SLC25A17/PCCB/HSD17B4/ACADM/ACADS/AUH/ALDH1L2/PPARA	26
GO:0035493	SNARE complex assembly	8/2107	23/18888	0.347826	3.11805	3.60145	0.00248017	0.0448159	0.0387017	VAMP2/UVRAG/SNCA/SNAP25/ANKRD27/SEPTIN8/VPS8/VAMP4	8
GO:0010828	positive regulation of glucose transmembrane transport	12/2107	44/18888	0.272727	2.44484	3.39988	0.002499	0.0450057	0.0388656	AKT1/ARPP19/SLC1A2/APPL1/IRS2/MAPK14/PRKCI/RHOQ/MEF2A/INSR/SORBS1/C2CD5	12
GO:0010810	regulation of cell-substrate adhesion	39/2107	221/18888	0.176471	1.58195	3.08356	0.00251264	0.0450057	0.0388656	SPOCK2/SFRP1/ARHGEF7/GPM6B/CLASP2/FZD7/CASK/ARPC2/ACTG1/EDIL3/SPOCK1/RAC1/MAP4K4/CIB1/MINK1/NF2/PTPRA/CSPG5/PTPRO/RAC3/PREX1/NRP1/ADAM15/RSU1/FLNA/PRKCE/DUSP22/THY1/PDPN/COL26A1/RCC2/ONECUT1/AJAP1/DOCK5/WNT4/FAM107A/PTK2B/FERMT2/ITGA3	39
GO:0014047	glutamate secretion	9/2107	28/18888	0.321429	2.88142	3.53019	0.00251331	0.0450057	0.0388656	GABBR1/NTRK2/SNCA/APBA1/TRPV1/PRKG1/DTNBP1/GIPC1/TRH	9
GO:0048638	regulation of developmental growth	54/2107	330/18888	0.163636	1.4669	3.03195	0.00252769	0.0451275	0.0389708	CDKN1A/NKX6-1/MAP1B/RNF157/SHTN1/SPAG9/APOE/AKT1/APP/ARX/OLFM1/ERBB4/CACNG7/L1CAM/MEGF8/RND2/TOMM70/PLAA/SLC23A2/LIMK1/PLCB1/RTN4R/SEMA6C/FGF13/MAPK14/NRP1/CITED2/TTL/TGFBR1/SEMA4F/CYFIP1/DIO3/CDH4/SPTBN4/ULK2/TNR/PEX5/GSK3A/WWC1/CPNE6/EZR/SYT17/SEMA7A/INSR/WWC3/STAT3/SGPL1/GDF15/NPPC/MKKS/FLVCR1/FXN/PPARA/RIMS1	54
GO:0071230	cellular response to amino acid stimulus	19/2107	86/18888	0.22093	1.98051	3.22926	0.0025881	0.0457977	0.0395496	BCL2L1/SLC7A5/LAMTOR2/CUL3/SESN2/XBP1/ASS1/NTRK2/BAIAP2/CAPN2/NSMF/SESN1/COL3A1/HPCA/CPEB3/HSF1/GCLM/IPO5/CPEB1	19
GO:0006241	CTP biosynthetic process	6/2107	14/18888	0.428571	3.84189	3.76915	0.00259595	0.0457977	0.0395496	CTPS2/NME2/NME1/CTPS1/UCK2/UCKL1	6
GO:0042762	regulation of sulfur metabolic process	6/2107	14/18888	0.428571	3.84189	3.76915	0.00259595	0.0457977	0.0395496	PDK3/SLC7A11/SNCA/PXYLP1/TM9SF2/PDK1	6
GO:0106070	regulation of adenylate cyclase-activating G protein-coupled receptor signaling pathway	6/2107	14/18888	0.428571	3.84189	3.76915	0.00259595	0.0457977	0.0395496	ARRDC3/ATP2B4/PRKCA/GNAI2/GSK3A/PDE4A	6
GO:0015820	leucine transport	5/2107	10/18888	0.5	4.4822	3.90284	0.00267217	0.0463836	0.0400555	SLC7A5/SLC3A2/SLC6A15/SLC7A6/SLC6A17	5
GO:0021892	cerebral cortex GABAergic interneuron differentiation	5/2107	10/18888	0.5	4.4822	3.90284	0.00267217	0.0463836	0.0400555	DLX2/ARX/RAC3/DLX1/ASCL1	5
GO:0097113	AMPA glutamate receptor clustering	5/2107	10/18888	0.5	4.4822	3.90284	0.00267217	0.0463836	0.0400555	CHRDL1/APOE/SLC7A11/ZDHHC2/NLGN1	5
GO:0097688	glutamate receptor clustering	5/2107	10/18888	0.5	4.4822	3.90284	0.00267217	0.0463836	0.0400555	CHRDL1/APOE/SLC7A11/ZDHHC2/NLGN1	5
GO:0098779	positive regulation of mitophagy in response to mitochondrial depolarization	5/2107	10/18888	0.5	4.4822	3.90284	0.00267217	0.0463836	0.0400555	OPTN/TOMM7/PINK1/HUWE1/VPS13C	5
GO:0035094	response to nicotine	13/2107	50/18888	0.26	2.33075	3.33862	0.00267583	0.0463836	0.0400555	NKX6-1/CNR1/SLC7A11/MAPK1/GABBR1/VCAM1/CASP3/PPP1R9B/B2M/BAD/NFKB1/PPARA/IGF1R	13
GO:0051881	regulation of mitochondrial membrane potential	17/2107	74/18888	0.22973	2.05939	3.23546	0.00275768	0.0476639	0.0411612	BCL2L1/PINK1/BAX/PPA2/SOD2/SLC25A27/TUSC2/DYNLL1/SLC25A33/BAK1/TRPV1/BID/PYCR1/BAD/IFI6/PIP5KL1/GCLM	17
GO:0031111	negative regulation of microtubule polymerization or depolymerization	11/2107	39/18888	0.282051	2.52842	3.3856	0.00279964	0.0480934	0.0415321	STMN2/ARHGEF7/MAP1B/CLASP2/CIB1/SNCA/FGF13/ARHGEF2/TPX2/MID1/NAV3	11
GO:0046847	filopodium assembly	16/2107	68/18888	0.235294	2.10927	3.24704	0.00280481	0.0480934	0.0415321	GPM6A/FSCN1/ARHGEF4/PALM/PPP1R9B/NRP1/TGFBR1/RHOQ/RAB3IP/STAU2/EZR/NLGN1/ARHGAP44/PLPPR5/PPP1R16B/FMNL3	16
GO:0097120	receptor localization to synapse	15/2107	62/18888	0.241935	2.16881	3.26636	0.00281479	0.0480934	0.0415321	NSG1/SCRIB/ERBB4/CACNG7/CACNG4/LGI1/STX7/SNAP25/GRIP2/IQSEC2/GRIP1/NETO2/NLGN1/ARHGAP44/ADAM10	15
GO:1903078	positive regulation of protein localization to plasma membrane	15/2107	62/18888	0.241935	2.16881	3.26636	0.00281479	0.0480934	0.0415321	PRNP/ATP2B4/SQSTM1/AKT1/CIB1/PPP1R9B/SPTBN1/ZDHHC2/PRKCI/PTPN9/PRKCE/EZR/NKD2/SORBS1/ITGA3	15
GO:0009062	fatty acid catabolic process	22/2107	106/18888	0.207547	1.86054	3.14816	0.0028758	0.0485789	0.0419514	CNR1/AKT1/PCCA/ACOT7/SESN2/ACAT1/IRS2/ACADVL/ACAT2/NUDT7/ACAA1/PCK2/PEX5/PHYH/SLC25A17/PCCB/HSD17B4/ACADM/ACADS/AUH/ALDH1L2/PPARA	22
GO:0035303	regulation of dephosphorylation	22/2107	106/18888	0.207547	1.86054	3.14816	0.0028758	0.0485789	0.0419514	ARPP19/CALM2/PINK1/YWHAE/PPP4R4/NSMF/IGBP1/SMG5/PPP1R7/ANKLE2/PPP6R3/CRY2/HSP90B1/AMBRA1/NUAK1/NCK2/PDGFRB/NCK1/PPP1R16B/INPP5K/IKBKB/HTT	22
GO:0046545	development of primary female sexual characteristics	22/2107	106/18888	0.207547	1.86054	3.14816	0.0028758	0.0485789	0.0419514	BCL2L1/SFRP1/CTNNA1/ADCYAP1R1/PCYT1B/CASP3/BAX/SCAPER/EIF2B2/ZFX/ROBO2/IDH1/PLEKHA1/INSR/SGPL1/NPPC/WNT4/FANCG/INHBB/LHFPL2/ADAMTS1/KITLG	22
GO:0097306	cellular response to alcohol	22/2107	106/18888	0.207547	1.86054	3.14816	0.0028758	0.0485789	0.0419514	SFRP1/ADCY2/GRAMD1A/AKT1/PAX6/CTNNA1/MLC1/SLC23A2/TP53INP1/SOD2/XRN1/ADAM15/PRKD1/GNAI1/PRKCE/ADCY1/ADCY3/BLM/INHBB/MAP4K1/LARP1/IGF1R	22
GO:0044242	cellular lipid catabolic process	40/2107	230/18888	0.173913	1.55903	3.02252	0.00292358	0.0492467	0.042528	ENPP2/CNR1/SIRT2/AKT1/PCCA/ASAH1/ACOT7/SCARB2/SESN2/PLCB1/ACAT1/IRS2/ACADVL/ACAT2/NUDT7/ABHD5/ACAA1/IDH1/GDPD1/PCK2/PEX5/ABHD6/PRDX6/GM2A/PHYH/LPL/SLC25A17/PCCB/SCARB1/SGPL1/HSD17B4/ACER3/GDE1/ACADM/ACADS/AUH/ALDH1L2/NEU1/PPARA/NAPEPLD	40

## Sheet: IP-InhibN_Down
ID	Description	GeneRatio	BgRatio	RichFactor	FoldEnrichment	zScore	pvalue	p.adjust	qvalue	geneID	Count
GO:0035268	protein mannosylation	9/865	25/18888	0.36	7.8609	7.52007	8.94949e-07	0.00319908	0.00297002	LARGE1/DPY19L3/DPM3/TMTC1/NUS1/DPY19L1/POMT1/POMGNT1/RXYLT1	9
GO:0097502	mannosylation	9/865	26/18888	0.346154	7.55856	7.33124	1.31325e-06	0.00319908	0.00297002	LARGE1/DPY19L3/DPM3/TMTC1/NUS1/DPY19L1/POMT1/POMGNT1/RXYLT1	9
GO:0060271	cilium assembly	39/865	385/18888	0.101299	2.21194	5.26341	3.10587e-06	0.00504394	0.00468279	ATP6V1D/TCTN1/DYNC2LI1/YAP1/TTLL1/GBF1/ATXN10/FBXW8/BBS4/UBE2B/IFT43/AHI1/NME5/WDR54/TMEM67/HAP1/MKS1/IFT22/ENTR1/BBS9/LAMA5/TMEM107/DNAAF5/CFAP206/STK36/E2F4/ARMC9/FAM161A/PPP1R35/IFT27/DNAAF2/TOGARAM1/KIAA0753/CC2D2A/RAB11FIP3/ATG5/DNAAF4/INTU/CBY1	39
GO:0048193	Golgi vesicle transport	32/865	294/18888	0.108844	2.37669	5.21194	5.3965e-06	0.00639033	0.00593277	BET1L/SEC13/TBC1D20/COG3/SCAMP3/LAMP1/SYS1/ARFGAP2/TMED9/LMAN1/GBF1/SEC24A/GGA1/GOLGA5/ERGIC3/TRAPPC12/RAB6A/GGA2/VCP/VPS35L/PLPP3/SCFD1/IER3IP1/LMAN2L/SEC22B/ATP2C1/ANK3/CNST/VAMP3/ZW10/TMED1/GOSR1	32
GO:0044782	cilium organization	40/865	412/18888	0.0970874	2.11998	5.03538	6.55822e-06	0.00639033	0.00593277	ATP6V1D/TCTN1/DYNC2LI1/YAP1/TTLL1/GBF1/ATXN10/FBXW8/BBS4/UBE2B/IFT43/AHI1/NME5/WDR54/TMEM67/HAP1/MKS1/IFT22/ENTR1/BBS9/RRP7A/LAMA5/TMEM107/DNAAF5/CFAP206/STK36/E2F4/ARMC9/FAM161A/PPP1R35/IFT27/DNAAF2/TOGARAM1/KIAA0753/CC2D2A/RAB11FIP3/ATG5/DNAAF4/INTU/CBY1	40
GO:0048593	camera-type eye morphogenesis	19/865	133/18888	0.142857	3.11941	5.3735	1.02363e-05	0.00780848	0.00724938	SIX3/BMP7/CRB2/EPHB2/LARGE1/TBC1D20/EPHB1/NECTIN1/CTNNB1/ATF4/BBS4/AHI1/DLL1/SP3/PROX1/TSPAN12/TH/VEGFA/RDH13	19
GO:0021915	neural tube development	21/865	158/18888	0.132911	2.90223	5.26016	1.12191e-05	0.00780848	0.00724938	GBX2/LMO4/BMP7/ABL1/TCTN1/PSEN1/FZD2/ZFP36L1/BBS4/PTCH1/MTHFR/CELSR1/MKS1/PROX1/TMEM107/BCL10/CC2D2A/SSBP3/INTU/CBY1/DCHS1	21
GO:0048592	eye morphogenesis	20/865	162/18888	0.123457	2.69578	4.74877	5.29672e-05	0.032257	0.0299474	SIX3/BMP7/CRB2/EPHB2/LARGE1/TBC1D20/EPHB1/NECTIN1/CTNNB1/ATF4/BBS4/AHI1/DLL1/SP3/PROX1/TSPAN12/TH/VEGFA/RDH13/DZANK1	20
GO:0016197	endosomal transport	29/865	289/18888	0.100346	2.19114	4.47036	6.61034e-05	0.0357811	0.0332192	SNF8/BET1L/STX12/ALS2/ARL8B/RGP1/LEPROTL1/GBF1/VPS37B/UBE2O/GGA1/RAB6A/WASHC5/WASHC3/ARFIP1/AGAP2/MAPK3/VCP/ENTR1/VPS35L/ACAP2/WDR81/VPS26C/CHMP2B/RAB11FIP3/VAMP3/TOM1/GOSR1/SNX33	29
GO:0060562	epithelial tube morphogenesis	32/865	335/18888	0.0955224	2.08581	4.39284	7.34424e-05	0.0357811	0.0332192	NTN1/GPC3/GBX2/LMO4/BMP7/ABL1/TCTN1/PSEN1/GREB1L/YAP1/FZD2/CTNNB1/MED1/BBS4/PTCH1/MMP14/AHI1/DLL1/CSNK2B/MTHFR/CELSR1/MKS1/SMAD3/PROX1/LAMA5/DDR1/BCL10/HS2ST1/CC2D2A/VEGFA/PODXL/DCHS1	32
GO:0090596	sensory organ morphogenesis	28/865	278/18888	0.100719	2.19929	4.41317	8.22717e-05	0.0364389	0.0338298	SIX3/SLITRK6/NTN1/GBX2/BMP7/FOXG1/CRB2/EPHB2/LARGE1/TBC1D20/EPHB1/NECTIN1/FZD2/CTNNB1/ATF4/BBS4/AHI1/DLL1/SP3/MAPK3/PROX1/TSPAN12/TH/ZIC1/VEGFA/RDH13/INTU/DZANK1	28
GO:0006888	endoplasmic reticulum to Golgi vesicle-mediated transport	17/865	132/18888	0.128788	2.81219	4.57717	0.000111774	0.0398351	0.0369829	SEC13/TBC1D20/COG3/TMED9/LMAN1/GBF1/SEC24A/ERGIC3/TRAPPC12/VCP/SCFD1/IER3IP1/LMAN2L/SEC22B/ZW10/TMED1/GOSR1	17
GO:0072006	nephron development	19/865	158/18888	0.120253	2.62583	4.49584	0.00011521	0.0398351	0.0369829	EGR1/GPC3/BMP7/GREB1L/YAP1/CTNNB1/PTCH1/AHI1/DLL1/COMT/MAGI2/LAMA5/LAMB2/SEC61A1/PPP3CA/HS2ST1/VEGFA/PODXL/DCHS1	19
GO:0033145	positive regulation of intracellular steroid hormone receptor signaling pathway	5/865	12/18888	0.416667	9.09827	6.14757	0.000120461	0.0398351	0.0369829	YAP1/MED1/KMT2D/LMO3/SKP2	5
GO:0048568	embryonic organ development	39/865	455/18888	0.0857143	1.87164	4.12309	0.000134605	0.0398351	0.0369829	SIX3/SLITRK6/NTN1/GBX2/NES/BMP7/FOXG1/CRB2/EPHB2/PPIL1/PSEN1/CDKN1C/ARID2/YAP1/FZD2/CTNNB1/ATF4/ZFP36L1/MED1/FBXW8/PTCH1/MMP14/EGLN1/AHI1/DLL1/SP3/MAPK3/NR2F2/MKS1/SMAD3/PROX1/MBD3/TH/PPP1R35/ZIC1/SLC39A1/CC2D2A/VEGFA/TEAD1	39
GO:0001654	eye development	35/865	393/18888	0.0890585	1.94467	4.14595	0.000140418	0.0398351	0.0369829	SIX3/SLITRK6/NES/VIM/BMP7/MEIS2/CRB2/EPHB2/LARGE1/TBC1D20/EPHB1/PSEN1/CDKN1C/ACTL6A/NECTIN1/CTNNB1/ATF4/ATF6/MED1/BBS4/AHI1/DLL1/MDM1/SP3/SMAD3/PROX1/TSPAN12/LAMB2/TH/CC2D2A/VEGFA/RDH13/SOX2/PDE6B/DZANK1	35
GO:0033146	regulation of intracellular estrogen receptor signaling pathway	8/865	35/18888	0.228571	4.99105	5.17734	0.000146302	0.0398351	0.0369829	LBH/YAP1/MED1/KMT2D/LATS1/UBA5/DNAAF4/SKP2	8
GO:0035269	protein O-linked mannosylation	6/865	19/18888	0.315789	6.89553	5.6325	0.000147174	0.0398351	0.0369829	LARGE1/DPM3/TMTC1/POMT1/POMGNT1/RXYLT1	6
GO:0150063	visual system development	35/865	397/18888	0.0881612	1.92507	4.08101	0.000170856	0.0438111	0.0406741	SIX3/SLITRK6/NES/VIM/BMP7/MEIS2/CRB2/EPHB2/LARGE1/TBC1D20/EPHB1/PSEN1/CDKN1C/ACTL6A/NECTIN1/CTNNB1/ATF4/ATF6/MED1/BBS4/AHI1/DLL1/MDM1/SP3/SMAD3/PROX1/TSPAN12/LAMB2/TH/CC2D2A/VEGFA/RDH13/SOX2/PDE6B/DZANK1	35
GO:0070482	response to oxygen levels	32/865	354/18888	0.0903955	1.97386	4.05219	0.000204201	0.0483603	0.0448976	CHCHD2/EGR1/FAM162A/SLC2A1/HK2/BMP7/ADSL/LMNA/ENO1/EGLN3/AGTRAP/ALKBH5/ATF4/ZFP36L1/TXN2/TFRC/TMEM199/MMP14/EGLN1/BNIP3L/MTHFR/COMT/ACAA2/SMAD3/TBL2/SCFD1/TH/MIEF1/AK4/VEGFA/SOX2/ATG7	32
GO:0014706	striated muscle tissue development	26/865	265/18888	0.0981132	2.14238	4.10286	0.000221654	0.0483603	0.0448976	LOX/BMP7/ABL1/LMNA/LARGE1/ARID2/YAP1/MED1/TPM1/EGLN1/DLL1/CREB1/SMAD3/PROX1/SORBS2/KDM6B/CTDP1/NPRL3/HDAC3/CACNA1G/VEGFA/ATG5/RGS2/ZMPSTE24/CBY1/DIPK2A	26
GO:0048880	sensory system development	35/865	403/18888	0.0868486	1.89641	3.98499	0.000227675	0.0483603	0.0448976	SIX3/SLITRK6/NES/VIM/BMP7/MEIS2/CRB2/EPHB2/LARGE1/TBC1D20/EPHB1/PSEN1/CDKN1C/ACTL6A/NECTIN1/CTNNB1/ATF4/ATF6/MED1/BBS4/AHI1/DLL1/MDM1/SP3/SMAD3/PROX1/TSPAN12/LAMB2/TH/CC2D2A/VEGFA/RDH13/SOX2/PDE6B/DZANK1	35
GO:0051963	regulation of synapse assembly	15/865	115/18888	0.130435	2.84815	4.35508	0.000241332	0.0483603	0.0448976	SLITRK4/SLITRK2/SLITRK6/NTN1/SLIT1/EPHB2/EPHB1/CRIPT/NECTIN1/NLGN3/CTNNB1/LRRN1/SETD5/LRFN1/EPHB3	15
GO:0036293	response to decreased oxygen levels	30/865	327/18888	0.0917431	2.00329	4.00936	0.000247391	0.0483603	0.0448976	CHCHD2/EGR1/FAM162A/SLC2A1/HK2/BMP7/ADSL/LMNA/ENO1/EGLN3/AGTRAP/ALKBH5/ATF4/ZFP36L1/TXN2/TFRC/MMP14/EGLN1/BNIP3L/MTHFR/COMT/ACAA2/SMAD3/TBL2/SCFD1/TH/MIEF1/AK4/VEGFA/SOX2	30
GO:0001666	response to hypoxia	29/865	313/18888	0.0926518	2.02313	3.99866	0.00026428	0.0483603	0.0448976	CHCHD2/EGR1/FAM162A/SLC2A1/HK2/BMP7/ADSL/LMNA/ENO1/EGLN3/AGTRAP/ALKBH5/ATF4/ZFP36L1/TXN2/TFRC/MMP14/EGLN1/BNIP3L/MTHFR/COMT/ACAA2/SMAD3/TBL2/SCFD1/TH/MIEF1/AK4/VEGFA	29
GO:0019081	viral translation	6/865	21/18888	0.285714	6.23881	5.2622	0.000272091	0.0483603	0.0448976	PCBP2/MCTS1/EIF2D/EIF3G/DHX9/ATG5	6
GO:0006486	protein glycosylation	23/865	225/18888	0.102222	2.23211	4.0731	0.000277933	0.0483603	0.0448976	GALNT1/LARGE1/ST8SIA1/PSEN1/COG3/DPY19L3/DAD1/DPM3/TMTC1/NUS1/GCNT2/DPY19L1/DHDDS/STT3A/MGAT1/POMT1/POMGNT1/ALG1/SLC35C2/TET3/ST3GAL3/DOLK/RXYLT1	23
GO:0043413	macromolecule glycosylation	23/865	225/18888	0.102222	2.23211	4.0731	0.000277933	0.0483603	0.0448976	GALNT1/LARGE1/ST8SIA1/PSEN1/COG3/DPY19L3/DAD1/DPM3/TMTC1/NUS1/GCNT2/DPY19L1/DHDDS/STT3A/MGAT1/POMT1/POMGNT1/ALG1/SLC35C2/TET3/ST3GAL3/DOLK/RXYLT1	23

## Sheet: InhibN-MGE_Up
ID	Description	GeneRatio	BgRatio	RichFactor	FoldEnrichment	zScore	pvalue	p.adjust	qvalue	geneID	Count
GO:0034976	response to endoplasmic reticulum stress	87/2876	269/18888	0.32342	2.12405	7.86929	1.21765e-12	7.40573e-09	6.71628e-09	HM13/BCL2L1/ERO1A/GRINA/RNF5/USP14/CANX/RHBDD2/CDK5RAP3/DNAJC10/GORASP2/PARP6/CCDC47/P4HB/SEC61B/CREB3/SERP1/HSP90B1/OS9/CLU/ERLEC1/XBP1/CALR/TMEM33/SELENOS/UBE2J1/UFM1/PDIA3/SGTA/TMED2/MANF/DDRGK1/DNAJB9/TNFRSF10B/FAF2/DERL2/DDIT3/APAF1/DNAJC3/HSPA5/CLGN/FAM8A1/ERP44/CHAC1/RNF103/TBL2/FAF1/SEL1L/FLOT1/MBTPS2/ERP29/EIF2AK3/RNF175/UFD1/VAPB/TMX1/UBAC2/RASGRF1/TMEM67/TMUB1/EIF2AK4/DDX3X/NRBF2/NGLY1…	87
GO:0006260	DNA replication	84/2876	278/18888	0.302158	1.98441	7.00775	1.50601e-10	3.23236e-07	2.93144e-07	RBBP7/MAP2K4/ORC4/LIG1/TOPBP1/WDR18/REPIN1/RUVBL2/DACH1/DNAJA3/FAF1/CHEK1/POLD2/ORC3/RNASEH1/TSPYL2/RBBP6/CDC25A/RPA1/DONSON/RMI1/RAD50/WRN/ENDOG/ACTL6A/CENPX/RFC4/FEN1/ESCO1/CENPS/CINP/PDS5A/KIN/MCM6/NT5M/RECQL4/RFC5/MCM2/FBH1/TTF1/CDK1/CDT1/POLA1/STN1/GRWD1/ZPR1/TIMELESS/POLA2/GINS1/POLH/CDK2/TOP1MT/DBF4/WDHD1/PCLAF/CHRAC1/GEN1/NFIC/PURA/TONSL/GINS2/RRM2B/ORC1/RFWD3/RPA3/FANCM/DTL/ZRANB3/MCM5/Z…	84
GO:0006888	endoplasmic reticulum to Golgi vesicle-mediated transport	50/2876	132/18888	0.378788	2.48767	7.26904	1.59439e-10	3.23236e-07	2.93144e-07	ARF4/TRAPPC4/YKT6/YIF1A/SEC31A/COPG1/GOLT1B/COPB1/P4HB/KDELR2/ARCN1/COG3/SEC24A/SEC22A/GOSR1/COPA/SEC23A/TRAPPC3/SEC24C/COPB2/SEC23IP/TRAPPC11/TMED10/TRAPPC6A/TMED2/TMED3/LMAN2/SEC23B/PPP6C/SCAP/YIPF5/SEC24D/TMED9/GBF1/TRAPPC9/LMAN1/YIF1B/TRAPPC1/RINT1/SEC13/TRAPPC13/VAPB/KLHL12/TRAPPC2L/IER3IP1/CREB3L2/STX17/VAMP7/MAPK15/ANK1	50
GO:0036503	ERAD pathway	44/2876	113/18888	0.389381	2.55724	7.03652	7.07202e-10	1.0753e-06	9.75195e-07	HM13/RNF5/USP14/CANX/RHBDD2/DNAJC10/CCDC47/SEC61B/HSP90B1/OS9/ERLEC1/XBP1/CALR/SELENOS/UBE2J1/SGTA/DNAJB9/FAF2/DERL2/HSPA5/CLGN/FAM8A1/RNF103/FAF1/SEL1L/RNF175/UFD1/TMX1/UBAC2/TMEM67/TMUB1/NGLY1/SDF2L1/RHBDD1/ERLIN2/EDEM2/FBXO17/YOD1/WFS1/SVIP/UBXN8/DERL3/MAN1C1/TRIM25	44
GO:0006457	protein folding	69/2876	225/18888	0.306667	2.01402	6.48485	3.24701e-09	3.94967e-06	3.58197e-06	ERO1A/TRAP1/WDR83OS/CANX/HSPD1/CDC37/DNAJC10/CCDC47/P4HB/RIC3/PRDX4/HSP90B1/PFDN5/CLU/PPIG/TCP1/CALR/PDIA3/BAG5/PPIL1/CRTAP/PPIE/DNAJC3/NUDCD2/HSPA5/CCT8/DNAJB11/CLGN/LMAN1/ERP44/RUVBL2/HSPA9/DNAJA3/HSPA4/PPIB/ST13/DNAJC1/GRPEL1/ERP29/CRYAB/TXNDC5/DNAJC4/PPID/NGLY1/TAPBP/SDF2L1/TBCE/MOGS/DNAJC25/HSPA14/PPIF/ENGASE/FKBP10/PDCL3/FKBP9/ZPR1/RP2/PPIL3/PDIA4/PDIA5/BAG3/CHCHD4/WFS1/CCT6B/BAG2/P3H1/DNAJ…	69
GO:0006261	DNA-templated DNA replication	54/2876	160/18888	0.3375	2.21652	6.54915	4.07552e-09	4.13122e-06	3.74662e-06	ORC4/LIG1/TOPBP1/WDR18/DACH1/DNAJA3/POLD2/ORC3/RPA1/DONSON/RAD50/WRN/ENDOG/CENPX/RFC4/FEN1/CENPS/MCM6/RECQL4/RFC5/MCM2/FBH1/CDT1/POLA1/ZPR1/TIMELESS/POLA2/GINS1/CDK2/DBF4/WDHD1/CHRAC1/GEN1/PURA/TONSL/GINS2/RRM2B/ORC1/RFWD3/FANCM/ZRANB3/MCM5/ZNF365/PRIMPOL/MRE11/BRCA2/CCNE2/BRCA1/POLD4/E2F7/CDC6/TK1/RBBP8/EME1	54
GO:0048193	Golgi vesicle transport	82/2876	294/18888	0.278912	1.83174	6.09155	1.56074e-08	1.26672e-05	1.14879e-05	ARF4/TRAPPC4/GOLGA7/YKT6/YIF1A/AP2A1/SEC31A/RAB6A/COPG1/RER1/GOLT1B/COPB1/P4HB/NSF/KDELR2/ARCN1/GOLGA5/COG3/NAPA/SEC24A/SEC22A/GOSR1/AP3D1/COPA/SEC23A/ARFGAP3/TRAPPC3/SEC24C/GABARAPL2/COPB2/GGA2/SEC23IP/BET1L/TRAPPC11/TMED10/TRAPPC6A/MON2/TMED2/TMED3/LMAN2/UVRAG/SEC23B/PPP6C/SCAP/YIPF5/GOSR2/SEC24D/TMED9/EXOC2/GBF1/TRAPPC9/LMAN1/YIF1B/TRAPPC1/ARL3/RINT1/SEC13/COG5/COG1/TRAPPC13/COG6/GOLPH3L/ARFGE…	82
GO:0015980	energy derivation by oxidation of organic compounds	91/2876	338/18888	0.269231	1.76816	6.03937	1.69574e-08	1.26672e-05	1.14879e-05	COL6A1/NDUFA4/DGUOK/PPP1R1A/NDUFAB1/COX6A1/COX7A2L/TRAP1/NDUFV2/NDUFB9/NDUFB7/NDUFC2/COX6C/GYG2/PPP1R3C/MDH2/NDUFB2/PYGB/NDUFA5/SURF1/ATP5F1E/COX5B/SELENOS/MDH1/NDUFS8/NDUFB6/NDUFC1/COX8A/GFPT1/NDUFA7/OXA1L/COX4I1/STK40/SIRT3/CYC1/MYBBP1A/UQCR11/NDUFV3/GBE1/NOP53/ISCU/PINK1/NDUFA6/ADSL/STOML2/SHMT2/NDUFA12/ATP5PO/CHCHD5/DLAT/NDUFA13/ATP5ME/COQ9/SLC25A33/COQ10B/CCNB1/IRS2/GFPT2/PHKG2/AK4/CYCS/ACO1…	91
GO:0007059	chromosome segregation	108/2876	423/18888	0.255319	1.6768	5.96633	1.87446e-08	1.26672e-05	1.14879e-05	USP9X/ANAPC11/RIOK3/DYNC1H1/UBE2I/DDB1/LCMT1/RNF4/CHMP2A/CIAO1/MLH1/CIAO2B/UVRAG/TPX2/AAAS/MAP9/SMARCA2/P3H4/CENPM/BUB3/NUP43/HDAC3/BCL7C/CEP63/ACTR2/ITGB3BP/MAP1S/DUSP1/CIAO2A/BECN1/CENPJ/MLH3/MAD2L1/HAUS2/ACTL6A/CENPX/SMC5/CCNB1/KNSTRN/LATS1/DDX3X/BCL7B/CENPS/NCAPH2/CDC20/SAC3D1/RIOK2/SMC2/NCAPD2/NUSAP1/HAUS1/MAD2L1BP/TOP3B/TUBGCP5/CDK1/CHMP2B/CDT1/NUP37/KNTC1/NDC1/CCNB2/BIRC5/MKI67/ASPM/DSN1/K…	108
GO:0005996	monosaccharide metabolic process	72/2876	252/18888	0.285714	1.87642	5.93591	3.99937e-08	2.43242e-05	2.20597e-05	ENO2/HK2/PRKACA/PKM/SLC2A1/PDK3/PGAM1/GPI/HK1/DCXR/ENO1/G6PC3/MDH2/TSTD1/DDB1/LCMT1/SERP1/PFKP/ALDOC/SELENOS/MDH1/SLC25A1/FUCA1/GALE/ADIPOR1/GALK2/FOXK2/MAN2A1/AKR1A1/MPI/MST1/PFKFB3/WDTC1/GOT1/MAN2A2/SLC37A4/DLAT/PFKFB4/IRS2/LIPA/GLB1/CRY1/PHKG2/SLC25A13/GCLC/RORA/FUCA2/GCK/ADPGK/MLYCD/PPP1R3E/LRP5/INPPL1/TCF7L2/PCK2/PPARD/MAN2B1/FOXO1/TIGAR/H6PD/PGM1/NR3C1/IGFBP4/FUT5/SLC35A2/SLC2A3/SDHAF3/KHK/…	72
GO:0019318	hexose metabolic process	67/2876	232/18888	0.288793	1.89664	5.82377	7.46774e-08	4.12898e-05	3.74459e-05	ENO2/HK2/PRKACA/PKM/PDK3/PGAM1/GPI/HK1/DCXR/ENO1/G6PC3/MDH2/TSTD1/DDB1/LCMT1/SERP1/PFKP/ALDOC/SELENOS/MDH1/SLC25A1/FUCA1/GALE/ADIPOR1/GALK2/FOXK2/MAN2A1/MPI/MST1/PFKFB3/WDTC1/GOT1/MAN2A2/SLC37A4/DLAT/PFKFB4/IRS2/LIPA/GLB1/CRY1/PHKG2/SLC25A13/RORA/FUCA2/GCK/ADPGK/MLYCD/PPP1R3E/LRP5/INPPL1/TCF7L2/PCK2/PPARD/MAN2B1/FOXO1/TIGAR/H6PD/PGM1/NR3C1/IGFBP4/FUT5/SLC35A2/SDHAF3/KHK/PGM2/ENO3/PPARA	67
GO:0044772	mitotic cell cycle phase transition	111/2876	451/18888	0.24612	1.61638	5.61494	9.6994e-08	4.33986e-05	3.93583e-05	ANAPC11/CCNI/CDKN2D/CDK5RAP3/DDB1/LCMT1/MRNIP/BCAT1/CHMP2A/TAF10/PRKDC/PSME1/PPP6C/CCNG1/PPME1/TOPBP1/CKS2/SMARCA2/NABP2/NOP53/EIF4E/CDK14/RINT1/BUB3/CHEK1/FBXL15/ZFP36L1/BCL7C/UBE2A/CDC25A/MBTPS2/DUSP1/DONSON/TPRA1/APPL1/RAD50/CENPJ/UBE2E2/MAD2L1/TMEM14B/ACTL6A/MTA3/SMC5/CCNB1/LATS1/DDX3X/BCL7B/CALM1/CDC20/RIOK2/CDKN1C/ACVR1/MAD2L1BP/TRIAP1/CTDP1/CDK1/KNTC1/CCNB2/FBXO7/E2F3/BIRC5/CDK2AP2/INIP/CD…	111
GO:0030970	retrograde protein transport, ER to cytosol	17/2876	29/18888	0.586207	3.84989	6.50909	9.9898e-08	4.33986e-05	3.93583e-05	HM13/SEC61B/HSP90B1/OS9/ERLEC1/SELENOS/UBE2J1/FAF2/DERL2/SEL1L/UFD1/UBAC2/RHBDD1/EDEM2/YOD1/SVIP/DERL3	17
GO:1903513	endoplasmic reticulum to cytosol transport	17/2876	29/18888	0.586207	3.84989	6.50909	9.9898e-08	4.33986e-05	3.93583e-05	HM13/SEC61B/HSP90B1/OS9/ERLEC1/SELENOS/UBE2J1/FAF2/DERL2/SEL1L/UFD1/UBAC2/RHBDD1/EDEM2/YOD1/SVIP/DERL3	17
GO:0006839	mitochondrial transport	55/2876	182/18888	0.302198	1.98467	5.65704	2.11852e-07	8.5899e-05	7.79021e-05	BNIP3L/HK2/BCL2L1/COL6A1/ROMO1/TOMM5/SFXN1/VDAC1/TOMM20/HSPD1/SLC25A4/PAM16/MPC1/TOMM6/TOMM70/TOMM40/SLC25A36/SLC25A1/SLC25A39/MRS2/VDAC2/SLC25A46/PINK1/SAMM50/HSPA4/SLC35F6/SLC25A24/TIMM10B/SLC25A32/TOMM22/GRPEL1/NDUFA13/SLC25A33/SLC25A26/SLC25A13/SLC25A38/GCLC/CPT2/PPIF/SLC25A15/PSEN2/MPV17L/SLC25A37/MTX1/SFXN2/TST/CHCHD4/UCP2/THEM4/SLC9A1/TRMT10B/NPTX1/MCUB/SLC25A20/SFXN5	55
GO:0006487	protein N-linked glycosylation	29/2876	72/18888	0.402778	2.64522	5.92763	2.33502e-07	8.68049e-05	7.87237e-05	ALG13/MLEC/DDOST/STT3A/DAD1/OST4/UBE2J1/GFPT1/RPN1/ALG3/DPM1/DHDDS/B4GALT7/ALG2/ALG5/GORASP1/MGAT1/RFT1/GFPT2/ALG8/OSTC/MOGS/GAL3ST1/DPAGT1/ALG1/MAGT1/FUT5/DERL3/MAN1C1	29
GO:0006986	response to unfolded protein	45/2876	138/18888	0.326087	2.14156	5.70415	2.42631e-07	8.68049e-05	7.87237e-05	ERO1A/HSPD1/RHBDD2/CDK5RAP3/DNAJC10/PARP6/CREB3/SERP1/OS9/ERLEC1/XBP1/TMEM33/SELENOS/TMED2/TRAM1/MANF/DDRGK1/DNAJB9/FAF2/DERL2/DDIT3/DNAJC3/HSPA5/ERP44/CHAC1/TBL2/HSPA4/MBTPS2/EIF2AK3/DNAJC4/VAPB/RHBDD1/SERPINH1/EDEM2/CREB3L2/CREB3L1/BAG3/YOD1/WFS1/CREB3L4/ERN1/CTH/DERL3/TMBIM6/FICD	45
GO:0045333	cellular respiration	68/2876	245/18888	0.277551	1.8228	5.49382	3.12451e-07	0.000105574	9.57454e-05	COL6A1/NDUFA4/DGUOK/NDUFAB1/COX6A1/COX7A2L/TRAP1/NDUFV2/NDUFB9/NDUFB7/NDUFC2/COX6C/MDH2/NDUFB2/NDUFA5/SURF1/ATP5F1E/COX5B/MDH1/NDUFS8/NDUFB6/NDUFC1/COX8A/NDUFA7/OXA1L/COX4I1/SIRT3/CYC1/MYBBP1A/UQCR11/NDUFV3/NOP53/ISCU/PINK1/NDUFA6/ADSL/STOML2/SHMT2/NDUFA12/ATP5PO/CHCHD5/DLAT/NDUFA13/ATP5ME/COQ9/SLC25A33/COQ10B/CCNB1/AK4/CYCS/ACO1/SLC25A13/SOD2/GPD2/IDH3A/NDUFB3/PPIF/COA6/CDK1/UQCC3/ETFDH/ME3/SLC2…	68
GO:0071816	tail-anchored membrane protein insertion into ER membrane	12/2876	17/18888	0.705882	4.63585	6.35603	4.43956e-07	0.000137406	0.000124614	GET1/EMC7/EMC10/GET3/CAMLG/SGTA/MMGT1/EMC3/EMC8/EMC6/EMC9/UBL4A	12
GO:0034470	ncRNA processing	105/2876	433/18888	0.242494	1.59257	5.28664	4.61876e-07	0.000137406	0.000124614	RIOK3/NHP2/DDX1/PRKRA/GTF2H5/DDX18/DICER1/DROSHA/ELP1/ELP2/PRKDC/EBNA1BP2/EIF4A3/EIF6/WDR75/DPH3/NUDT16/NAT10/TSEN34/RPP21/PES1/NOC4L/WDR18/METTL15/PARN/NOP53/RTRAF/DALRD3/USP36/TRMT112/WDR55/NOL7/NCBP1/GEMIN4/TRMT6/AGO2/RNF113A/TUT1/DDX54/THUMPD1/ELP4/EXOSC7/REXO4/DDX51/TRUB1/UTP23/EXOSC8/METTL5/RRP12/TBL3/FCF1/URB1/NOP10/RIOK1/NPM3/FAM98A/RPF2/PIH1D1/MPHOSPH10/BCDIN3D/GON7/YRDC/RIOK2/WBP11/CDKA…	105
GO:0034620	cellular response to unfolded protein	33/2876	90/18888	0.366667	2.40807	5.67469	4.80618e-07	0.000137406	0.000124614	ERO1A/HSPD1/RHBDD2/CDK5RAP3/DNAJC10/PARP6/CREB3/SERP1/OS9/ERLEC1/XBP1/TMEM33/SELENOS/TMED2/DDRGK1/DNAJB9/DERL2/DDIT3/HSPA5/TBL2/MBTPS2/EIF2AK3/VAPB/RHBDD1/CREB3L1/BAG3/YOD1/WFS1/ERN1/CTH/DERL3/TMBIM6/FICD	33
GO:0000075	cell cycle checkpoint signaling	56/2876	191/18888	0.293194	1.92554	5.44851	4.97029e-07	0.000137406	0.000124614	CDK5RAP3/LCMT1/MRNIP/PRKDC/CCNG1/TOPBP1/RHNO1/NABP2/NOP53/RINT1/BUB3/CHEK1/CEP63/MBTPS2/DUSP1/DONSON/RAD50/MAD2L1/CLOCK/CCNB1/EIF2AK4/CRY1/CDC20/MAD2L1BP/TRIAP1/CDK1/CDT1/KNTC1/BIRC5/TIMELESS/INIP/CDK2/E2F1/GEN1/AURKB/ABRAXAS1/ORC1/RFWD3/PLK1/RNASEH2B/DTL/ATRIP/TRIP13/TTK/MRE11/BRCA2/NUF2/CLSPN/BRCA1/MAP3K20/NDC80/E2F7/CDC6/RBBP8/EME1/FBXO4	56
GO:0035966	response to topologically incorrect protein	47/2876	152/18888	0.309211	2.03073	5.40729	7.61702e-07	0.00020142	0.000182669	ERO1A/HSPD1/RHBDD2/CDK5RAP3/DNAJC10/PARP6/CREB3/SERP1/OS9/CLU/ERLEC1/XBP1/TMEM33/SELENOS/TMED2/TRAM1/MANF/DDRGK1/DNAJB9/FAF2/DERL2/DDIT3/DNAJC3/HSPA5/ERP44/CHAC1/TBL2/HSPA4/MBTPS2/EIF2AK3/DNAJC4/UFD1/VAPB/RHBDD1/SERPINH1/EDEM2/CREB3L2/CREB3L1/BAG3/YOD1/WFS1/CREB3L4/ERN1/CTH/DERL3/TMBIM6/FICD	47
GO:0030968	endoplasmic reticulum unfolded protein response	29/2876	76/18888	0.381579	2.506	5.5753	8.98931e-07	0.000222133	0.000201453	ERO1A/RHBDD2/CDK5RAP3/DNAJC10/PARP6/CREB3/SERP1/OS9/ERLEC1/XBP1/TMEM33/SELENOS/TMED2/DDRGK1/DNAJB9/DERL2/DDIT3/HSPA5/TBL2/MBTPS2/EIF2AK3/VAPB/CREB3L1/YOD1/WFS1/ERN1/CTH/DERL3/FICD	29
GO:0009060	aerobic respiration	57/2876	199/18888	0.286432	1.88113	5.29574	9.13074e-07	0.000222133	0.000201453	COL6A1/NDUFA4/DGUOK/NDUFAB1/COX6A1/COX7A2L/NDUFV2/NDUFB9/NDUFB7/NDUFC2/COX6C/MDH2/NDUFB2/NDUFA5/SURF1/ATP5F1E/COX5B/MDH1/NDUFS8/NDUFB6/NDUFC1/COX8A/NDUFA7/OXA1L/COX4I1/SIRT3/CYC1/UQCR11/NDUFV3/NOP53/ISCU/PINK1/NDUFA6/ADSL/STOML2/SHMT2/NDUFA12/ATP5PO/DLAT/NDUFA13/ATP5ME/COQ9/SLC25A33/CCNB1/AK4/CYCS/ACO1/IDH3A/NDUFB3/PPIF/COA6/CDK1/UQCC3/ME3/SLC25A14/SUCLG2/UQCRHL	57
GO:0033108	mitochondrial respiratory chain complex assembly	35/2876	101/18888	0.346535	2.27585	5.4486	1.0377e-06	0.000242742	0.000220143	NDUFAB1/COX16/NDUFB9/NDUFB7/NDUFC2/NDUFB2/NDUFA5/SURF1/NDUFS8/NDUFB6/NDUFC1/COA3/OXA1L/COX18/NDUFAF3/COX14/SAMM50/NDUFA6/CHCHD7/NDUFA12/NDUFA13/SLC25A33/COX17/SMIM20/COA5/TFAM/SDHAF1/NUBPL/NDUFB3/COA1/UQCC3/CHCHD4/SCO2/TMEM223/SDHAF3	35
GO:0022904	respiratory electron transport chain	40/2876	123/18888	0.325203	2.13576	5.35571	1.19673e-06	0.000269575	0.000244479	NDUFA4/DGUOK/NDUFAB1/COX6A1/COX7A2L/NDUFV2/NDUFB9/NDUFB7/NDUFC2/COX6C/NDUFB2/NDUFA5/COX5B/NDUFS8/NDUFB6/NDUFC1/COX8A/NDUFA7/COX4I1/CYC1/MYBBP1A/UQCR11/NDUFV3/ISCU/PINK1/NDUFA6/NDUFA12/COQ9/CCNB1/CYCS/SLC25A13/SOD2/GPD2/NDUFB3/COA6/CDK1/UQCC3/ETFDH/SCO2/UQCRHL	40
GO:0019693	ribose phosphate metabolic process	112/2876	480/18888	0.233333	1.53241	5.00741	1.47449e-06	0.000320279	0.000290463	ENO2/HK2/CTPS2/PRKACA/CASK/PKM/COL6A1/PDK3/NDUFAB1/PGAM1/GPI/HK1/ENO1/NDUFV2/IMPDH2/NDUFB9/NDUFB7/NDUFC2/NDUFB2/NDUFA5/GNAI3/ACSL4/HINT1/TPST1/ATP5F1E/NME2/ATP1B1/DDIT4/PFKP/FAR1/NME1/ALDOC/NDUFS8/NDUFB6/NDUFC1/SLC25A1/ATP6V0C/NDUFA7/ELOVL5/EIF6/PRPSAP2/ATP5MC3/FOXK2/NDUFV3/MVD/PAICS/PINK1/MMUT/GUK1/RHOQ/MVK/NDUFA6/ADSL/PRPS1/HACD2/STOML2/NDUFA12/ATP5PO/DLAT/GMPR2/NDUFA13/ATP5ME/ATIC/NT5C/ENTPD7/…	112
GO:0034975	protein folding in endoplasmic reticulum	9/2876	11/18888	0.818182	5.37337	6.14893	1.78497e-06	0.000355756	0.000322636	ERO1A/CANX/DNAJC10/P4HB/HSP90B1/CALR/PDIA3/DNAJC3/HSPA5	9
GO:0009259	ribonucleotide metabolic process	109/2876	466/18888	0.233906	1.53616	4.96679	1.79711e-06	0.000355756	0.000322636	ENO2/HK2/CTPS2/PRKACA/CASK/PKM/COL6A1/PDK3/NDUFAB1/PGAM1/GPI/HK1/ENO1/NDUFV2/IMPDH2/NDUFB9/NDUFB7/NDUFC2/NDUFB2/NDUFA5/GNAI3/ACSL4/HINT1/TPST1/ATP5F1E/NME2/ATP1B1/DDIT4/PFKP/FAR1/NME1/ALDOC/NDUFS8/NDUFB6/NDUFC1/SLC25A1/ATP6V0C/NDUFA7/ELOVL5/EIF6/ATP5MC3/FOXK2/NDUFV3/MVD/PAICS/PINK1/MMUT/GUK1/RHOQ/MVK/NDUFA6/ADSL/HACD2/STOML2/NDUFA12/ATP5PO/DLAT/GMPR2/NDUFA13/ATP5ME/ATIC/NT5C/ENTPD7/APRT/LIPA/MCEE…	109
GO:0090114	COPII-coated vesicle budding	20/2876	44/18888	0.454545	2.98521	5.58726	1.81329e-06	0.000355756	0.000322636	TRAPPC4/SEC31A/SEC24A/SEC23A/TRAPPC3/SEC24C/TRAPPC11/TMED10/TRAPPC6A/TMED2/SEC23B/PPP6C/SCAP/SEC24D/TRAPPC1/SEC13/VAPB/KLHL12/TRAPPC2L/MAPK15	20
GO:0022900	electron transport chain	51/2876	175/18888	0.291429	1.91394	5.14778	1.91956e-06	0.000361524	0.000327867	NDUFA4/DGUOK/NDUFAB1/COX6A1/COX7A2L/NDUFV2/NDUFB9/NDUFB7/NDUFC2/COX6C/NDUFB2/NDUFA5/SURF1/COX5B/NDUFS8/NDUFB6/NDUFC1/COX8A/NDUFA7/COX4I1/CYC1/MYBBP1A/UQCR11/AKR7A2/NDUFV3/ISCU/PINK1/GSR/NDUFA6/P4HA2/NDUFA12/COQ9/NQO2/CCNB1/CYCS/SLC25A13/SOD2/GPD2/CYB5A/NDUFB3/COA6/POR/CYB561/CDK1/UQCC3/FDX1/ETFDH/GLRX2/PDIA5/SCO2/UQCRHL	51
GO:0007093	mitotic cell cycle checkpoint signaling	44/2876	143/18888	0.307692	2.02076	5.19278	1.9619e-06	0.000361524	0.000327867	CDK5RAP3/LCMT1/MRNIP/PRKDC/CCNG1/TOPBP1/NABP2/NOP53/RINT1/BUB3/CHEK1/MBTPS2/DUSP1/DONSON/RAD50/MAD2L1/CCNB1/CDC20/MAD2L1BP/TRIAP1/CDK1/KNTC1/BIRC5/INIP/CDK2/GEN1/AURKB/ABRAXAS1/ORC1/RFWD3/PLK1/DTL/TRIP13/TTK/MRE11/NUF2/CLSPN/BRCA1/MAP3K20/NDC80/E2F7/CDC6/RBBP8/EME1	44
GO:0009150	purine ribonucleotide metabolic process	105/2876	446/18888	0.235426	1.54615	4.94684	2.02101e-06	0.000361524	0.000327867	ENO2/HK2/PRKACA/CASK/PKM/COL6A1/PDK3/NDUFAB1/PGAM1/GPI/HK1/ENO1/NDUFV2/IMPDH2/NDUFB9/NDUFB7/NDUFC2/NDUFB2/NDUFA5/GNAI3/ACSL4/HINT1/TPST1/ATP5F1E/NME2/ATP1B1/DDIT4/PFKP/FAR1/NME1/ALDOC/NDUFS8/NDUFB6/NDUFC1/SLC25A1/ATP6V0C/NDUFA7/ELOVL5/EIF6/ATP5MC3/FOXK2/NDUFV3/MVD/PAICS/PINK1/MMUT/GUK1/RHOQ/MVK/NDUFA6/ADSL/HACD2/STOML2/NDUFA12/ATP5PO/DLAT/GMPR2/NDUFA13/ATP5ME/ATIC/NT5C/ENTPD7/APRT/LIPA/MCEE/PPAT/…	105
GO:0006891	intra-Golgi vesicle-mediated transport	17/2876	34/18888	0.5	3.28373	5.64853	2.08837e-06	0.000362898	0.000329114	RAB6A/COPG1/COPB1/NSF/GOLGA5/COG3/NAPA/GOSR1/COPA/TRAPPC3/GABARAPL2/COPB2/GOSR2/COG5/COG1/COG6/RAB33B	17
GO:0045048	protein insertion into ER membrane	16/2876	31/18888	0.516129	3.38965	5.64329	2.4322e-06	0.000410906	0.000372652	GET1/WDR83OS/EMC7/EMC10/CCDC47/GET3/CAMLG/SGTA/TRAM1/MMGT1/EMC3/RAB5IF/EMC8/EMC6/EMC9/UBL4A	16
GO:1990542	mitochondrial transmembrane transport	33/2876	96/18888	0.34375	2.25756	5.23518	2.56129e-06	0.00042102	0.000381825	COL6A1/ROMO1/SFXN1/VDAC1/TOMM20/HSPD1/SLC25A4/PAM16/MPC1/TOMM70/TOMM40/SLC25A36/SLC25A1/SLC25A39/MRS2/SLC25A24/SLC25A32/GRPEL1/SLC25A33/SLC25A26/SLC25A13/SLC25A38/CPT2/SLC25A15/PSEN2/SLC25A37/SFXN2/TST/CHCHD4/UCP2/MCUB/SLC25A20/SFXN5	33
GO:0006399	tRNA metabolic process	56/2876	202/18888	0.277228	1.82068	4.96987	3.45702e-06	0.000553305	0.000501794	DDX1/DICER1/FARSB/ELP1/ELP2/POLR2L/DPH3/NAT10/TSEN34/RPP21/POLR2E/RARS2/RTRAF/DALRD3/GTF3C1/TRMT112/ZCCHC7/TRMT6/THUMPD1/ELP4/EXOSC7/NARS2/POLR3D/TRUB1/GTF3C4/EXOSC8/FAM98A/BCDIN3D/GON7/YRDC/CDKAL1/LSM6/POP4/CTU2/RPP25L/LCMT2/PUS3/CDK5RAP1/TARS2/MOCS3/ANKRD16/DUS2/EARS2/THG1L/PUS7/MTFMT/TRMT10A/PUSL1/PARS2/TRMT61A/TRMT10B/RPP14/RPP40/METTL8/DTWD2/CTU1	56
GO:0044818	mitotic G2/M transition checkpoint	22/2876	53/18888	0.415094	2.72611	5.33307	3.6242e-06	0.00056519	0.000512573	CDK5RAP3/MRNIP/CCNG1/TOPBP1/NABP2/NOP53/RINT1/CHEK1/MBTPS2/DONSON/RAD50/CDK1/INIP/ABRAXAS1/ORC1/PLK1/DTL/MRE11/CLSPN/BRCA1/CDC6/RBBP8	22
GO:0035967	cellular response to topologically incorrect protein	34/2876	102/18888	0.333333	2.18915	5.10356	3.98177e-06	0.00057007	0.000516999	ERO1A/HSPD1/RHBDD2/CDK5RAP3/DNAJC10/PARP6/CREB3/SERP1/OS9/ERLEC1/XBP1/TMEM33/SELENOS/TMED2/DDRGK1/DNAJB9/DERL2/DDIT3/HSPA5/TBL2/MBTPS2/EIF2AK3/UFD1/VAPB/RHBDD1/CREB3L1/BAG3/YOD1/WFS1/ERN1/CTH/DERL3/TMBIM6/FICD	34
GO:0042773	ATP synthesis coupled electron transport	34/2876	102/18888	0.333333	2.18915	5.10356	3.98177e-06	0.00057007	0.000516999	NDUFA4/DGUOK/NDUFAB1/COX6A1/COX7A2L/NDUFV2/NDUFB9/NDUFB7/NDUFC2/COX6C/NDUFB2/NDUFA5/COX5B/NDUFS8/NDUFB6/NDUFC1/COX8A/NDUFA7/COX4I1/CYC1/UQCR11/NDUFV3/ISCU/PINK1/NDUFA6/NDUFA12/COQ9/CCNB1/CYCS/NDUFB3/COA6/CDK1/UQCC3/UQCRHL	34
GO:0042775	mitochondrial ATP synthesis coupled electron transport	34/2876	102/18888	0.333333	2.18915	5.10356	3.98177e-06	0.00057007	0.000516999	NDUFA4/DGUOK/NDUFAB1/COX6A1/COX7A2L/NDUFV2/NDUFB9/NDUFB7/NDUFC2/COX6C/NDUFB2/NDUFA5/COX5B/NDUFS8/NDUFB6/NDUFC1/COX8A/NDUFA7/COX4I1/CYC1/UQCR11/NDUFV3/ISCU/PINK1/NDUFA6/NDUFA12/COQ9/CCNB1/CYCS/NDUFB3/COA6/CDK1/UQCC3/UQCRHL	34
GO:0006302	double-strand break repair	78/2876	312/18888	0.25	1.64186	4.84504	4.03042e-06	0.00057007	0.000516999	HMGB2/MORF4L2/DDX1/CIB1/MRNIP/RNF138/MLH1/MAGEF1/ERCC1/DEK/PRKDC/UVRAG/TNKS1BP1/ZSWIM7/PAXX/RADX/TOPBP1/SMARCA2/RHNO1/NABP2/XRCC6/RUVBL2/DMAP1/CHEK1/BCL7C/ACTR2/RPA1/RNF8/RMI1/RAD50/WRN/PSMD14/RIF1/ACTL6A/SMC5/FEN1/ERCC5/BCL7B/MCM6/RNF168/RECQL4/MCM2/FBH1/POLA1/HPF1/TIMELESS/INIP/AP5Z1/GEN1/UHRF1/TONSL/GINS2/ABRAXAS1/AP5S1/SMARCD2/DCLRE1A/RFWD3/EYA1/PLK1/RPA3/CYREN/FANCM/ATRIP/TRIP13/FANCB/MCM5/Z…	78
GO:0051205	protein insertion into membrane	20/2876	46/18888	0.434783	2.85542	5.33961	4.24389e-06	0.000586621	0.000532009	GET1/WDR83OS/EMC7/EMC10/CCDC47/GET3/MOAP1/CAMLG/SGTA/TRAM1/OXA1L/COX18/MMGT1/EMC3/RAB5IF/EMC8/RTP5/EMC6/EMC9/UBL4A	20
GO:0072655	establishment of protein localization to mitochondrion	38/2876	120/18888	0.316667	2.07969	5.02847	4.48993e-06	0.000606839	0.000550345	BNIP3L/HK2/ROMO1/TOMM5/HK1/TOMM20/HSPD1/PAM16/FZD5/UBE2D3/TOMM6/TOMM70/GDAP1/TOMM40/MOAP1/IMMP1L/PITRM1/OXA1L/COX18/DDIT3/PARL/LMAN1/RNF31/PINK1/USP36/SAMM50/HSPA4/TIMM10B/TOMM22/GRPEL1/NDUFA13/SAE1/FBXO7/TSPO/MICALL2/MTX1/CHCHD4/TRMT10B	38
GO:0009100	glycoprotein metabolic process	92/2876	386/18888	0.238342	1.5653	4.75572	4.99853e-06	0.000637072	0.000577763	ALG13/GPC1/CHPF/MLEC/DDOST/STT3A/COG3/DAD1/SERP1/GALNT2/GALNT1/GALNT16/OST4/UBE2J1/GANAB/GALNT11/GFPT1/NECAB2/RPN1/GNPTAB/GALNT9/CST3/DPY19L3/ADAMTS13/MAN2A1/ERP44/ALG3/TET1/DPM1/MAN2A2/DHDDS/VEGFB/PRKCSH/GNPTG/AGO2/CTSL/B4GALT7/ALG2/ALG5/GORASP1/MGAT1/MANBA/CHPF2/TNIP1/RFT1/GLB1/GFPT2/ALG8/NECAB3/FUT11/NGLY1/OSTC/CHST3/SULF1/NCSTN/MOGS/GAL3ST1/B4GALT6/DPAGT1/GALNT7/DPM3/GALNT13/ACOT8/TCF7L2/ENGA…	92
GO:0008033	tRNA processing	41/2876	134/18888	0.30597	2.00945	4.96983	5.05167e-06	0.000637072	0.000577763	DDX1/ELP1/ELP2/DPH3/NAT10/TSEN34/RPP21/RTRAF/DALRD3/TRMT112/TRMT6/THUMPD1/ELP4/TRUB1/FAM98A/BCDIN3D/GON7/YRDC/CDKAL1/LSM6/POP4/CTU2/RPP25L/LCMT2/PUS3/CDK5RAP1/MOCS3/ANKRD16/DUS2/THG1L/PUS7/MTFMT/TRMT10A/PUSL1/TRMT61A/TRMT10B/RPP14/RPP40/METTL8/DTWD2/CTU1	41
GO:0042254	ribosome biogenesis	79/2876	319/18888	0.247649	1.62642	4.78214	5.12907e-06	0.000637072	0.000577763	RIOK3/NHP2/GTF2H5/DDX18/GNL2/NGRN/DROSHA/PRKDC/EBNA1BP2/EIF4A3/EIF6/WDR75/NUDT16/NAT10/EIF2A/MYBBP1A/PES1/NOC4L/RSL24D1/WDR18/METTL15/NOP53/USP36/NMD3/MALSU1/DNTTIP2/TRMT112/WDR55/NOL7/ZNF622/GEMIN4/DDX54/TSC1/EXOSC7/REXO4/DDX51/UTP23/EXOSC8/METTL5/RRP12/LSG1/DDX3X/TBL3/FCF1/URB1/NOP10/RIOK1/GTF3A/NPM3/RPF2/PIH1D1/MPHOSPH10/CINP/RIOK2/WBP11/LSM6/POP4/IMP3/MAK16/TMA16/GRWD1/SBDS/FRG1/ZNF593/RIOX2/…	79
GO:0006900	vesicle budding from membrane	30/2876	86/18888	0.348837	2.29097	5.08531	5.13261e-06	0.000637072	0.000577763	TRAPPC4/SEC31A/SEC24A/AP3D1/SEC23A/ARFGAP3/TRAPPC3/SEC24C/TRAPPC11/TMED10/TRAPPC6A/TMED2/SEC23B/PPP6C/SCAP/SEC24D/TMED9/GBF1/TRAPPC9/TRAPPC1/SEC13/TRAPPC13/GOLPH3L/VAPB/KLHL12/TRAPPC2L/AP3M2/ANXA2/MAPK15/RILP	30
GO:0072522	purine-containing compound biosynthetic process	68/2876	264/18888	0.257576	1.69162	4.79606	5.58296e-06	0.000679111	0.000615888	DGUOK/PDK3/NDUFAB1/ENO1/NDUFV2/IMPDH2/NDUFB9/NDUFB7/NDUFC2/NDUFB2/NDUFA5/ACSL4/ATP5F1E/NME2/NME1/NDUFS8/NDUFB6/NDUFC1/SLC25A1/ATP6V0C/NDUFA7/ELOVL5/PRPSAP2/ATP5MC3/NDUFV3/PAICS/PINK1/MMUT/GUK1/QPRT/NDUFA6/ADSL/PRPS1/HACD2/STOML2/NDUFA12/ATP5PO/DLAT/NDUFA13/ATP5ME/ATIC/ADA2/NADK2/APRT/LIPA/PPAT/AK4/ADCY3/SLC25A13/COASY/NME6/NDUFB3/MLYCD/PRTFDC1/UQCC3/ACAT1/ELOVL1/NAMPT/GUCY1B1/ACSS1/GCDH/ACSS2/ADC…	68
GO:1901990	regulation of mitotic cell cycle phase transition	86/2876	356/18888	0.241573	1.58652	4.73478	5.75713e-06	0.000686566	0.000622649	ANAPC11/CDKN2D/CDK5RAP3/DDB1/LCMT1/MRNIP/PRKDC/PSME1/CCNG1/TOPBP1/SMARCA2/NABP2/NOP53/RINT1/BUB3/CHEK1/ZFP36L1/BCL7C/CDC25A/MBTPS2/DUSP1/DONSON/TPRA1/APPL1/RAD50/CENPJ/UBE2E2/MAD2L1/TMEM14B/ACTL6A/MTA3/CCNB1/DDX3X/BCL7B/CDC20/RIOK2/CDKN1C/ACVR1/MAD2L1BP/TRIAP1/CDK1/KNTC1/FBXO7/BIRC5/CDK2AP2/INIP/CDK7/CDK2/KLF11/E2F1/ZFP36L2/UBE2C/GEN1/BTN2A2/AURKB/RRM2B/ABRAXAS1/SMARCD2/ORC1/RFWD3/PLK1/RNASEH2B/D…	86
GO:0006400	tRNA modification	31/2876	91/18888	0.340659	2.23726	5.01409	6.30834e-06	0.000737833	0.000669144	ELP1/ELP2/DPH3/NAT10/DALRD3/TRMT112/TRMT6/THUMPD1/ELP4/TRUB1/BCDIN3D/GON7/YRDC/CDKAL1/CTU2/LCMT2/PUS3/CDK5RAP1/MOCS3/ANKRD16/DUS2/THG1L/PUS7/MTFMT/TRMT10A/PUSL1/TRMT61A/TRMT10B/METTL8/DTWD2/CTU1	31
GO:0006901	vesicle coating	18/2876	40/18888	0.45	2.95535	5.24658	7.07571e-06	0.000804354	0.000729472	TRAPPC4/AP3D1/ARFGAP3/TRAPPC3/TRAPPC11/TMED10/TRAPPC6A/TMED2/PPP6C/TMED9/GBF1/TRAPPC9/TRAPPC1/TRAPPC13/KLHL12/TRAPPC2L/AP3M2/MAPK15	18
GO:0006006	glucose metabolic process	53/2876	192/18888	0.276042	1.81289	4.79802	7.14158e-06	0.000804354	0.000729472	ENO2/HK2/PRKACA/PKM/PDK3/PGAM1/GPI/HK1/DCXR/ENO1/G6PC3/MDH2/TSTD1/DDB1/LCMT1/SERP1/PFKP/ALDOC/SELENOS/MDH1/SLC25A1/ADIPOR1/FOXK2/MST1/WDTC1/GOT1/SLC37A4/DLAT/IRS2/LIPA/CRY1/PHKG2/SLC25A13/RORA/GCK/ADPGK/MLYCD/PPP1R3E/LRP5/INPPL1/TCF7L2/PCK2/PPARD/FOXO1/TIGAR/H6PD/PGM1/NR3C1/IGFBP4/SDHAF3/PGM2/ENO3/PPARA	53
GO:0000086	G2/M transition of mitotic cell cycle	41/2876	136/18888	0.301471	1.97989	4.86047	7.58398e-06	0.000838651	0.000760575	CDK5RAP3/LCMT1/MRNIP/CCNG1/PPME1/TOPBP1/NABP2/NOP53/CDK14/RINT1/CHEK1/FBXL15/UBE2A/CDC25A/MBTPS2/DONSON/RAD50/MTA3/CCNB1/LATS1/CALM1/CDK1/INIP/CDK2/AURKB/RRM2B/ABRAXAS1/ORC1/PLK1/RNASEH2B/DTL/WNT10B/MRE11/CLSPN/BRCA1/AURKA/CDC25C/CDC6/CDK6/RBBP8/MELK	41
GO:0140014	mitotic nuclear division	70/2876	277/18888	0.252708	1.65965	4.68726	8.31769e-06	0.00090336	0.000819261	ANAPC11/OBSL1/UBE2I/LCMT1/CHMP2A/TPX2/TOM1L2/AAAS/MAP9/BUB3/CHEK1/BMP7/DAPK3/DUSP1/BECN1/L3MBTL1/MAD2L1/CCNB1/KNSTRN/CCDC8/NCAPH2/CDC20/BORA/NME6/SMC2/NCAPD2/NUSAP1/CDKN1C/MAD2L1BP/PRMT5/CTDP1/LRP5/CDK1/CHMP2B/CDT1/KNTC1/BIRC5/MKI67/KIF11/KIFC1/MZT1/UBE2C/GEN1/UHRF1/MYBL2/AURKB/ABRAXAS1/MAP10/RCC1/PLK1/NDE1/TRIP13/SPICE1/TTK/ARHGEF10/ESPL1/NUF2/AURKA/PDGFB/CENPI/KIF18A/CENPE/NDC80/KIF2C/CDC25C/KI…	70
GO:1901987	regulation of cell cycle phase transition	104/2876	455/18888	0.228571	1.50113	4.58578	9.01344e-06	0.00096175	0.000872215	ANAPC11/CDKN2D/CDK5RAP3/DDB1/LCMT1/MRNIP/PRKDC/PSME1/DDRGK1/CCNG1/TOPBP1/SMARCA2/RHNO1/NABP2/NOP53/ATP2B4/RINT1/BUB3/CHEK1/ZFP36L1/BCL7C/CEP63/CDC25A/MBTPS2/DUSP1/DONSON/TPRA1/APPL1/RAD50/CENPJ/UBE2E2/MAD2L1/TMEM14B/CLOCK/ACTL6A/MTA3/CCNB1/MLF1/EIF2AK4/DDX3X/CRY1/BCL7B/CDC20/RIOK2/CDKN1C/ACVR1/MAD2L1BP/TRIAP1/CDK1/CDT1/KNTC1/FBXO7/BIRC5/TIMELESS/CDK2AP2/INIP/CDK7/CDK2/KLF11/E2F1/ZFP36L2/UBE2C/DBF…	104
GO:0046390	ribose phosphate biosynthetic process	61/2876	233/18888	0.261803	1.71938	4.68263	9.61945e-06	0.00099489	0.00090227	CTPS2/PDK3/NDUFAB1/ENO1/NDUFV2/IMPDH2/NDUFB9/NDUFB7/NDUFC2/NDUFB2/NDUFA5/ACSL4/ATP5F1E/NME2/NME1/NDUFS8/NDUFB6/NDUFC1/SLC25A1/ATP6V0C/NDUFA7/ELOVL5/PRPSAP2/ATP5MC3/NDUFV3/PAICS/PINK1/MMUT/NDUFA6/ADSL/PRPS1/HACD2/STOML2/NDUFA12/ATP5PO/DLAT/NDUFA13/ATP5ME/ATIC/APRT/LIPA/PPAT/AK4/ADCY3/SLC25A13/COASY/NME6/NDUFB3/MLYCD/UQCC3/ACAT1/UPP1/ELOVL1/GUCY1B1/ACSS1/GCDH/ACSS2/DHODH/ADCY7/HACD1/PPARA	61
GO:0070862	negative regulation of protein exit from endoplasmic reticulum	8/2876	10/18888	0.8	5.25396	5.70255	9.65119e-06	0.00099489	0.00090227	OS9/ERLEC1/UBE2J1/DERL2/UBAC2/YOD1/SVIP/DERL3	8
GO:0022613	ribonucleoprotein complex biogenesis	112/2876	499/18888	0.224449	1.47406	4.54837	9.93778e-06	0.00100736	0.000913579	RIOK3/CELF1/LSM4/NHP2/DDX1/PRKRA/GTF2H5/DDX18/GNL2/DICER1/NGRN/SF3B3/SNRPD2/SNRPC/DROSHA/CLNS1A/EIF3J/PUF60/PRKDC/EBNA1BP2/EIF4A3/EIF6/WDR75/NUDT16/DDX42/NAT10/EIF3B/EIF2A/XAB2/MYBBP1A/PES1/NOC4L/RSL24D1/WDR18/METTL15/NOP53/RUVBL2/RAMAC/USP36/SF3A3/PRPF31/NMD3/MALSU1/TSSC4/DNTTIP2/TRMT112/WDR55/NOL7/ZRSR2/NCBP1/ZNF622/GEMIN4/AGO2/DDX54/EIF3D/TSC1/EXOSC7/REXO4/DDX51/UTP23/SNRPG/EXOSC8/METTL5/RRP12…	112
GO:0009451	RNA modification	50/2876	180/18888	0.277778	1.82429	4.70931	1.06104e-05	0.00105791	0.000959425	ALKBH5/NHP2/RNMT/SNRPD2/ELP1/ELP2/DPH3/NAT10/DNAJB11/METTL15/PARN/DALRD3/RAMAC/TRMT112/TRMT6/THUMPD1/ELP4/TRUB1/SNRPG/METTL5/NOP10/BCDIN3D/GON7/YRDC/CBLL1/CDKAL1/CTU2/LCMT2/PUS3/CDK5RAP1/MOCS3/ANKRD16/DUS2/FTSJ3/RPUSD2/MRM2/THG1L/PUS7/ALKBH3/MTFMT/TRMT10A/PUSL1/TRMT61A/TRMT10B/TFB2M/METTL8/MRM1/DTWD2/RPUSD3/CTU1	50
GO:0018279	protein N-linked glycosylation via asparagine	13/2876	24/18888	0.541667	3.55737	5.31295	1.09439e-05	0.00107356	0.000973619	DDOST/STT3A/DAD1/OST4/UBE2J1/RPN1/DPM1/ALG5/MGAT1/ALG8/OSTC/MAGT1/DERL3	13
GO:0090151	establishment of protein localization to mitochondrial membrane	16/2876	34/18888	0.470588	3.09057	5.17077	1.12955e-05	0.00108316	0.000982319	ROMO1/TOMM5/TOMM20/TOMM6/TOMM70/TOMM40/MOAP1/OXA1L/COX18/SAMM50/HSPA4/TIMM10B/TOMM22/NDUFA13/MTX1/TRMT10B	16
GO:0044839	cell cycle G2/M phase transition	44/2876	152/18888	0.289474	1.90111	4.72729	1.13979e-05	0.00108316	0.000982319	CDK5RAP3/LCMT1/MRNIP/CCNG1/PPME1/TOPBP1/NABP2/NOP53/CDK14/RINT1/CHEK1/FBXL15/UBE2A/CDC25A/MBTPS2/DONSON/RAD50/MTA3/CCNB1/LATS1/CALM1/CDK1/CCNB2/INIP/CDK2/AURKB/RRM2B/ABRAXAS1/ORC1/PLK1/RNASEH2B/DTL/WNT10B/DYRK3/MRE11/CLSPN/BRCA1/AURKA/NDC80/CDC25C/CDC6/CDK6/RBBP8/MELK	44
GO:1901293	nucleoside phosphate biosynthetic process	73/2876	295/18888	0.247458	1.62517	4.58654	1.1841e-05	0.00110795	0.0010048	CTPS2/DGUOK/PDK3/NDUFAB1/ENO1/NDUFV2/IMPDH2/NDUFB9/NDUFB7/NDUFC2/NDUFB2/NDUFA5/ACSL4/ATP5F1E/NME2/NME1/NDUFS8/NDUFB6/NDUFC1/SLC25A1/ATP6V0C/NDUFA7/ELOVL5/PRPSAP2/ATP5MC3/DCTD/NDUFV3/PAICS/PINK1/MMUT/GUK1/QPRT/NDUFA6/ADSL/PRPS1/HACD2/STOML2/NDUFA12/ATP5PO/DLAT/NDUFA13/ATP5ME/AK9/ATIC/NADK2/APRT/TYMS/LIPA/DTYMK/PPAT/AK4/ADCY3/SLC25A13/COASY/NME6/NDUFB3/MLYCD/UQCC3/ACAT1/UPP1/ELOVL1/NAMPT/GUCY1B1/AC…	73
GO:0006119	oxidative phosphorylation	43/2876	148/18888	0.290541	1.90811	4.70044	1.28972e-05	0.0011885	0.00107785	NDUFA4/DGUOK/NDUFAB1/COX6A1/COX7A2L/NDUFV2/NDUFB9/NDUFB7/NDUFC2/COX6C/NDUFB2/NDUFA5/ATP5F1E/COX5B/NDUFS8/NDUFB6/NDUFC1/COX8A/NDUFA7/COX4I1/CYC1/UQCR11/NDUFV3/ISCU/PINK1/NDUFA6/STOML2/SHMT2/NDUFA12/ATP5PO/NDUFA13/ATP5ME/COQ9/SLC25A33/CCNB1/AK4/CYCS/NDUFB3/PPIF/COA6/CDK1/UQCC3/UQCRHL	43
GO:0009152	purine ribonucleotide biosynthetic process	56/2876	211/18888	0.265403	1.74302	4.59983	1.42578e-05	0.00127233	0.00115388	PDK3/NDUFAB1/ENO1/NDUFV2/IMPDH2/NDUFB9/NDUFB7/NDUFC2/NDUFB2/NDUFA5/ACSL4/ATP5F1E/NME2/NME1/NDUFS8/NDUFB6/NDUFC1/SLC25A1/ATP6V0C/NDUFA7/ELOVL5/ATP5MC3/NDUFV3/PAICS/PINK1/MMUT/NDUFA6/ADSL/HACD2/STOML2/NDUFA12/ATP5PO/DLAT/NDUFA13/ATP5ME/ATIC/APRT/LIPA/PPAT/AK4/ADCY3/SLC25A13/COASY/NME6/NDUFB3/MLYCD/UQCC3/ACAT1/ELOVL1/GUCY1B1/ACSS1/GCDH/ACSS2/ADCY7/HACD1/PPARA	56
GO:0009141	nucleoside triphosphate metabolic process	67/2876	266/18888	0.25188	1.65421	4.55404	1.44159e-05	0.00127233	0.00115388	ENO2/HK2/CTPS2/PRKACA/PKM/COL6A1/DGUOK/NDUFAB1/PGAM1/GPI/HK1/ENO1/NDUFV2/IMPDH2/NDUFB9/NDUFB7/NDUFC2/NDUFB2/NDUFA5/GNAI3/ATP5F1E/NME2/ATP1B1/DDIT4/PFKP/NME1/ALDOC/NDUFS8/NDUFB6/NDUFC1/ATP6V0C/NDUFA7/EIF6/NUDT16/ATP5MC3/FOXK2/NDUFV3/PINK1/RHOQ/NDUFA6/STOML2/DCTPP1/NDUFA12/ATP5PO/NDUFA13/ATP5ME/ENTPD7/TYMS/LIPA/DTYMK/AK4/SLC25A13/GCK/NME6/PRKAA2/NDUFB3/ADPGK/UQCC3/TSPO/RRM2B/UCP2/TIGAR/BEND3/PGM1/P…	67
GO:1901607	alpha-amino acid biosynthetic process	25/2876	69/18888	0.362319	2.37951	4.86525	1.44975e-05	0.00127233	0.00115388	GOT2/BCAT1/PSAT1/ALDH18A1/SEPHS2/SEPHS1/APIP/ATP2B4/PCBD1/PLOD2/GOT1/PYCR2/SHMT2/SRR/ASNSD1/MTHFR/MRI1/AASS/OAT/MTRR/ASS1/PYCR3/CTH/MTAP/SHMT1	25
GO:0009260	ribonucleotide biosynthetic process	59/2876	226/18888	0.261062	1.71451	4.57971	1.46437e-05	0.00127233	0.00115388	CTPS2/PDK3/NDUFAB1/ENO1/NDUFV2/IMPDH2/NDUFB9/NDUFB7/NDUFC2/NDUFB2/NDUFA5/ACSL4/ATP5F1E/NME2/NME1/NDUFS8/NDUFB6/NDUFC1/SLC25A1/ATP6V0C/NDUFA7/ELOVL5/ATP5MC3/NDUFV3/PAICS/PINK1/MMUT/NDUFA6/ADSL/HACD2/STOML2/NDUFA12/ATP5PO/DLAT/NDUFA13/ATP5ME/ATIC/APRT/LIPA/PPAT/AK4/ADCY3/SLC25A13/COASY/NME6/NDUFB3/MLYCD/UQCC3/ACAT1/UPP1/ELOVL1/GUCY1B1/ACSS1/GCDH/ACSS2/DHODH/ADCY7/HACD1/PPARA	59
GO:0007051	spindle organization	53/2876	197/18888	0.269036	1.76688	4.58561	1.58389e-05	0.00135679	0.00123048	DYNC1H1/DDB1/RNF4/CHMP2A/MLH1/UVRAG/TPX2/AAAS/MAP9/CLTC/HDAC3/CEP63/MAP1S/CENPJ/HAUS2/CCNB1/KNSTRN/CDC20/TBCE/SAC3D1/BORA/HAUS1/TUBGCP5/CHMP2B/EML1/CCNB2/BIRC5/SBDS/ASPM/KIF11/KIFC1/MZT1/UHRF1/MYBL2/AURKB/ABRAXAS1/MAP10/RCC1/PLK1/MYH9/SEPTIN1/SPICE1/TTK/ARHGEF10/ESPL1/NUF2/SPATA17/MAPK15/AURKA/CENPE/NDC80/KIF23/AURKC	53
GO:0090150	establishment of protein localization to membrane	69/2876	277/18888	0.249097	1.63594	4.51879	1.60724e-05	0.00135767	0.00123128	GET1/SCARB2/GOLGA7/ROMO1/TOMM5/WDR83OS/EMC7/EMC10/TOMM20/ATP6AP1/GORASP2/CCDC47/PRNP/NSF/SEC61B/TOMM6/TOMM70/CIB1/ATP1B1/GET3/TOMM40/MOAP1/GGA2/CAMLG/SEC61A2/SGTA/TRAM1/OXA1L/COX18/SSR1/HSPA5/SEC63/ATP13A1/YIF1B/SGTB/SAMM50/MMGT1/EMC3/HSPA4/SSR3/TIMM10B/TOMM22/RAB5IF/ZDHHC20/NDUFA13/EMC8/ZDHHC4/GORASP1/GOLPH3L/CACNG2/NECTIN3/RTP5/EMC6/SYS1/PEX26/CDK5/PEX3/EMC9/BLZF1/HPCA/ZDHHC14/MYO1C/MTX1/CHM/SI…	69
GO:0009165	nucleotide biosynthetic process	72/2876	293/18888	0.245734	1.61385	4.48795	1.7447e-05	0.0014536	0.00131828	CTPS2/DGUOK/PDK3/NDUFAB1/ENO1/NDUFV2/IMPDH2/NDUFB9/NDUFB7/NDUFC2/NDUFB2/NDUFA5/ACSL4/ATP5F1E/NME2/NME1/NDUFS8/NDUFB6/NDUFC1/SLC25A1/ATP6V0C/NDUFA7/ELOVL5/PRPSAP2/ATP5MC3/DCTD/NDUFV3/PAICS/PINK1/MMUT/GUK1/QPRT/NDUFA6/ADSL/PRPS1/HACD2/STOML2/NDUFA12/ATP5PO/DLAT/NDUFA13/ATP5ME/AK9/ATIC/NADK2/APRT/TYMS/LIPA/DTYMK/PPAT/AK4/ADCY3/SLC25A13/COASY/NME6/NDUFB3/MLYCD/UQCC3/ACAT1/UPP1/ELOVL1/NAMPT/GUCY1B1/AC…	72
GO:0010389	regulation of G2/M transition of mitotic cell cycle	33/2876	104/18888	0.317308	2.0839	4.6975	1.77446e-05	0.00145841	0.00132264	CDK5RAP3/MRNIP/CCNG1/TOPBP1/NABP2/NOP53/RINT1/CHEK1/CDC25A/MBTPS2/DONSON/RAD50/MTA3/CCNB1/CDK1/INIP/CDK2/AURKB/RRM2B/ABRAXAS1/ORC1/PLK1/RNASEH2B/DTL/WNT10B/MRE11/CLSPN/BRCA1/AURKA/CDC25C/CDC6/CDK6/RBBP8	33
GO:0070585	protein localization to mitochondrion	38/2876	127/18888	0.299213	1.96507	4.6247	1.94168e-05	0.00156195	0.00141654	BNIP3L/HK2/ROMO1/TOMM5/HK1/TOMM20/HSPD1/PAM16/FZD5/UBE2D3/TOMM6/TOMM70/GDAP1/TOMM40/MOAP1/IMMP1L/PITRM1/OXA1L/COX18/DDIT3/PARL/LMAN1/RNF31/PINK1/USP36/SAMM50/HSPA4/TIMM10B/TOMM22/GRPEL1/NDUFA13/SAE1/FBXO7/TSPO/MICALL2/MTX1/CHCHD4/TRMT10B	38
GO:0007029	endoplasmic reticulum organization	32/2876	100/18888	0.32	2.10159	4.68092	1.9518e-05	0.00156195	0.00141654	GET1/SEC31A/WDR83OS/EMC7/EMC10/CCDC47/RAB18/GET3/TMEM33/RETREG2/CAMLG/SGTA/TMED2/TRAM1/REEP5/ESYT2/LMAN1/MMGT1/EMC3/ATL2/ZFYVE27/RAB5IF/EMC8/EIF2AK3/VAPB/EMC6/EMC9/ESYT1/REEP6/LPCAT3/MAPK15/UBL4A	32
GO:0007088	regulation of mitotic nuclear division	36/2876	118/18888	0.305085	2.00363	4.63485	1.99195e-05	0.00157338	0.00142691	ANAPC11/OBSL1/LCMT1/TOM1L2/BUB3/CHEK1/BMP7/DAPK3/DUSP1/L3MBTL1/MAD2L1/CCNB1/CCDC8/CDC20/BORA/NME6/NUSAP1/MAD2L1BP/PRMT5/LRP5/KNTC1/BIRC5/MKI67/UBE2C/GEN1/AURKB/RCC1/PLK1/TRIP13/TTK/ESPL1/NUF2/AURKA/PDGFB/NDC80/CDC25C	36
GO:0000819	sister chromatid segregation	59/2876	229/18888	0.257642	1.69205	4.46545	2.2379e-05	0.00174499	0.00158254	ANAPC11/LCMT1/CHMP2A/TPX2/AAAS/MAP9/SMARCA2/BUB3/BCL7C/DUSP1/BECN1/MAD2L1/ACTL6A/CCNB1/KNSTRN/LATS1/BCL7B/NCAPH2/CDC20/RIOK2/SMC2/NCAPD2/NUSAP1/MAD2L1BP/CDK1/CHMP2B/CDT1/KNTC1/BIRC5/KIF11/KIFC1/MZT1/UBE2C/GEN1/UHRF1/MYBL2/AURKB/ABRAXAS1/MAP10/SMARCD2/PLK1/TRIP13/SPICE1/TTK/ARHGEF10/ESPL1/NUF2/MAPK15/CENPI/KIF18A/CENPE/MAP3K20/NDC80/KIF2C/CDC6/KIF23/CENPK/AURKC/CDCA5	59
GO:0098813	nuclear chromosome segregation	76/2876	317/18888	0.239748	1.57453	4.37199	2.58926e-05	0.00199341	0.00180783	ANAPC11/DYNC1H1/DDB1/LCMT1/CHMP2A/MLH1/TPX2/AAAS/MAP9/SMARCA2/P3H4/BUB3/BCL7C/ACTR2/MAP1S/DUSP1/BECN1/MLH3/MAD2L1/ACTL6A/CCNB1/KNSTRN/LATS1/BCL7B/NCAPH2/CDC20/RIOK2/SMC2/NCAPD2/NUSAP1/MAD2L1BP/CDK1/CHMP2B/CDT1/KNTC1/NDC1/CCNB2/BIRC5/ASPM/DSN1/KIF11/KIFC1/MZT1/UBE2C/GEN1/UHRF1/MYBL2/AURKB/ABRAXAS1/MAP10/SMARCD2/PLK1/SEPTIN1/TRIP13/SPICE1/TTK/ARHGEF10/ESPL1/MRE11/NUF2/CCNE2/MAPK15/AURKA/FAM83D/CENP…	76
GO:0010212	response to ionizing radiation	40/2876	138/18888	0.289855	1.90361	4.51516	2.70168e-05	0.00205395	0.00186274	BCL2L1/GTF2H5/MRNIP/GRB2/ERCC1/PRKDC/TNKS1BP1/TOPBP1/RHNO1/NABP2/XRCC6/ALAD/CBL/RNF8/CRYAB/WRN/CLOCK/AEN/CYP2R1/SOD2/YAP1/SMPD1/RNF168/GADD45A/TSPYL5/INIP/ABRAXAS1/RFWD3/EYA1/TIGAR/BRCA2/NHEJ1/RAD51AP1/BRCA1/XRCC4/MAP3K20/SFRP2/IKBIP/RAD54L/FBXO4	40
GO:0051225	spindle assembly	38/2876	129/18888	0.294574	1.9346	4.51407	2.8613e-05	0.00214845	0.00194844	DYNC1H1/DDB1/RNF4/CHMP2A/MLH1/TPX2/AAAS/MAP9/HDAC3/CEP63/CENPJ/HAUS2/CDC20/SAC3D1/HAUS1/TUBGCP5/CHMP2B/CCNB2/BIRC5/ASPM/KIF11/KIFC1/MZT1/UHRF1/MYBL2/AURKB/ABRAXAS1/MAP10/RCC1/PLK1/SEPTIN1/SPICE1/ARHGEF10/MAPK15/AURKA/NDC80/KIF23/AURKC	38
GO:0170038	proteinogenic amino acid biosynthetic process	21/2876	56/18888	0.375	2.4628	4.64604	3.81409e-05	0.00282894	0.00256558	GOT2/PSAT1/ALDH18A1/SEPHS2/SEPHS1/APIP/PLOD2/GOT1/PYCR2/SHMT2/ASNSD1/MTHFR/MRI1/AASS/OAT/MTRR/ASS1/PYCR3/CTH/MTAP/SHMT1	21
GO:0046835	carbohydrate phosphorylation	12/2876	23/18888	0.521739	3.4265	4.93479	3.95152e-05	0.00288048	0.00261232	HK2/HK1/NAGK/GNPTAB/GALK2/PFKFB3/GNPTG/PFKFB4/GCK/GNE/KHK/RBKS	12
GO:1902850	microtubule cytoskeleton organization involved in mitosis	45/2876	164/18888	0.27439	1.80205	4.37195	3.9783e-05	0.00288048	0.00261232	DYNC1H1/CHMP2A/TPX2/AAAS/MAP9/CLTC/HDAC3/MAP1S/SAPCD2/CENPJ/MAD2L1/CCNB1/ENKD1/CDC20/TBCE/BORA/NUSAP1/CDK1/CHMP2B/EML1/BIRC5/SBDS/KIF11/KIFC1/MZT1/UHRF1/MYBL2/AURKB/ABRAXAS1/MAP10/RCC1/PLK1/NDE1/PAX6/SPICE1/TTK/ARHGEF10/CENPA/ESPL1/NUF2/AURKA/CENPE/NDC80/KIF23/AURKC	45
GO:0007095	mitotic G2 DNA damage checkpoint signaling	16/2876	37/18888	0.432432	2.83998	4.74788	4.1836e-05	0.00292931	0.00265661	CDK5RAP3/MRNIP/CCNG1/TOPBP1/NOP53/RINT1/CHEK1/MBTPS2/DONSON/CDK1/ABRAXAS1/PLK1/DTL/MRE11/CLSPN/BRCA1	16
GO:0006047	UDP-N-acetylglucosamine metabolic process	9/2876	14/18888	0.642857	4.22194	5.11095	4.19024e-05	0.00292931	0.00265661	GFPT1/UAP1/GNPDA1/MGAT1/GFPT2/SLC35A3/DPAGT1/GNE/GNPNAT1	9
GO:1904152	regulation of retrograde protein transport, ER to cytosol	9/2876	14/18888	0.642857	4.22194	5.11095	4.19024e-05	0.00292931	0.00265661	OS9/ERLEC1/UBE2J1/DERL2/UBAC2/EDEM2/YOD1/SVIP/DERL3	9
GO:0061620	glycolytic process through glucose-6-phosphate	11/2876	20/18888	0.55	3.6121	4.9533	4.40685e-05	0.00304573	0.00276219	ENO2/HK2/PKM/PGAM1/HK1/ENO1/PFKP/FOXK2/GCK/ADPGK/ENO3	11
GO:0009144	purine nucleoside triphosphate metabolic process	62/2876	250/18888	0.248	1.62873	4.24118	4.85158e-05	0.00329839	0.00299132	ENO2/HK2/PRKACA/PKM/COL6A1/DGUOK/NDUFAB1/PGAM1/GPI/HK1/ENO1/NDUFV2/IMPDH2/NDUFB9/NDUFB7/NDUFC2/NDUFB2/NDUFA5/GNAI3/ATP5F1E/NME2/ATP1B1/DDIT4/PFKP/NME1/ALDOC/NDUFS8/NDUFB6/NDUFC1/ATP6V0C/NDUFA7/EIF6/NUDT16/ATP5MC3/FOXK2/NDUFV3/PINK1/RHOQ/NDUFA6/STOML2/NDUFA12/ATP5PO/NDUFA13/ATP5ME/ENTPD7/LIPA/AK4/SLC25A13/GCK/NME6/PRKAA2/NDUFB3/ADPGK/UQCC3/TSPO/UCP2/TIGAR/BEND3/PGM1/PRXL2C/ENO3/PPARA	62
GO:1903008	organelle disassembly	47/2876	175/18888	0.268571	1.76383	4.30227	4.88088e-05	0.00329839	0.00299132	BNIP3L/MAP1LC3B/HK2/VDAC1/SLC25A4/CDC37/FZD5/ATG4A/GABARAPL2/UFM1/RETREG2/WDR45B/RNF25/DDRGK1/RNF41/FAF2/WIPI2/PARL/ARFIP2/GCN1/SNX30/GBF1/USP10/PINK1/USP36/CISD2/ATG9A/RNF14/SPATA18/PNPLA2/BECN1/MTIF3/ZNF598/PRKAA2/CDK1/PELO/WIPI1/ULK3/FBXO7/TSPO/TIGAR/PLIN3/DYRK3/MTRES1/WDR45/AURKA/PLAAT3	47
GO:0000280	nuclear division	99/2876	446/18888	0.221973	1.4578	4.14659	5.04326e-05	0.00337067	0.00305687	ANAPC11/OBSL1/UBE2I/PSMD13/DDB1/LCMT1/CHMP2A/CALR/MLH1/ORC4/TPX2/TOM1L2/AAAS/MAP9/FOXJ3/CKS2/P3H4/BUB3/CHEK1/BMP7/DAPK3/ACTR2/DUSP1/RMI1/BECN1/RAD50/L3MBTL1/MLH3/MAD2L1/CENPX/CCNB1/KNSTRN/CCDC8/CENPS/NCAPH2/CDC20/BORA/NME6/SMC2/NCAPD2/NUSAP1/CDKN1C/MAD2L1BP/PRMT5/CTDP1/LRP5/CDK1/CHMP2B/CDT1/KNTC1/NDC1/CCNB2/BIRC5/MKI67/ASPM/CCNA1/KIF11/KIFC1/MZT1/UBE2C/GEN1/UHRF1/MYBL2/AURKB/ABRAXAS1/WNT4/MAP10/R…	99
GO:0032527	protein exit from endoplasmic reticulum	19/2876	49/18888	0.387755	2.54656	4.59399	5.16822e-05	0.00338687	0.00307157	HM13/SEC61B/HSP90B1/OS9/ERLEC1/SELENOS/UBE2J1/FAF2/DERL2/SEL1L/SEC13/CD81/UFD1/UBAC2/RHBDD1/EDEM2/YOD1/SVIP/DERL3	19
GO:0170034	L-amino acid biosynthetic process	21/2876	57/18888	0.368421	2.41959	4.549	5.17887e-05	0.00338687	0.00307157	GOT2/PSAT1/ALDH18A1/SEPHS2/SEPHS1/APIP/PLOD2/GOT1/PYCR2/SHMT2/ASNSD1/MTHFR/MRI1/AASS/OAT/MTRR/ASS1/PYCR3/CTH/MTAP/SHMT1	21
GO:0006164	purine nucleotide biosynthetic process	63/2876	256/18888	0.246094	1.61621	4.20699	5.41696e-05	0.00349809	0.00317243	DGUOK/PDK3/NDUFAB1/ENO1/NDUFV2/IMPDH2/NDUFB9/NDUFB7/NDUFC2/NDUFB2/NDUFA5/ACSL4/ATP5F1E/NME2/NME1/NDUFS8/NDUFB6/NDUFC1/SLC25A1/ATP6V0C/NDUFA7/ELOVL5/PRPSAP2/ATP5MC3/NDUFV3/PAICS/PINK1/MMUT/GUK1/QPRT/NDUFA6/ADSL/PRPS1/HACD2/STOML2/NDUFA12/ATP5PO/DLAT/NDUFA13/ATP5ME/ATIC/NADK2/APRT/LIPA/PPAT/AK4/ADCY3/SLC25A13/COASY/NME6/NDUFB3/MLYCD/UQCC3/ACAT1/ELOVL1/NAMPT/GUCY1B1/ACSS1/GCDH/ACSS2/ADCY7/HACD1/PPARA	63
GO:0048199	vesicle targeting, to, from or within Golgi	15/2876	34/18888	0.441176	2.89741	4.69301	5.46397e-05	0.00349809	0.00317243	TRAPPC4/ARFGAP3/TRAPPC3/TRAPPC11/TMED10/TRAPPC6A/TMED2/PPP6C/TMED9/GBF1/TRAPPC1/KLHL12/TRAPPC2L/WIPI1/MAPK15	15
GO:0000725	recombinational repair	48/2876	181/18888	0.265193	1.74165	4.249	5.76859e-05	0.00365464	0.00331441	MORF4L2/MRNIP/RNF138/MAGEF1/ZSWIM7/RADX/TOPBP1/RHNO1/NABP2/XRCC6/RUVBL2/DMAP1/CHEK1/ACTR2/RPA1/RMI1/WRN/PSMD14/RIF1/ACTL6A/SMC5/FEN1/ERCC5/MCM6/RECQL4/MCM2/FBH1/TIMELESS/INIP/AP5Z1/GEN1/UHRF1/TONSL/GINS2/AP5S1/RFWD3/RPA3/FANCM/FANCB/MCM5/ZNF365/MRE11/BRCA2/RAD51AP1/BRCA1/SWSAP1/RAD54L/RBBP8	48
GO:0061615	glycolytic process through fructose-6-phosphate	12/2876	24/18888	0.5	3.28373	4.74445	6.80866e-05	0.0042691	0.00387166	ENO2/HK2/PRKACA/PKM/PGAM1/HK1/ENO1/PFKP/FOXK2/GCK/ADPGK/ENO3	12
GO:0170036	import into the mitochondrion	18/2876	46/18888	0.391304	2.56987	4.51786	7.03416e-05	0.00433234	0.00392901	ROMO1/SFXN1/VDAC1/TOMM20/PAM16/TOMM70/TOMM40/SLC25A36/SLC25A39/SLC25A32/GRPEL1/SLC25A33/SLC25A38/PSEN2/SLC25A37/SFXN2/TST/MCUB	18
GO:0006626	protein targeting to mitochondrion	32/2876	106/18888	0.301887	1.98263	4.29956	7.05198e-05	0.00433234	0.00392901	BNIP3L/ROMO1/TOMM5/TOMM20/HSPD1/PAM16/FZD5/UBE2D3/TOMM6/TOMM70/GDAP1/TOMM40/IMMP1L/PITRM1/PARL/LMAN1/RNF31/PINK1/USP36/SAMM50/HSPA4/TIMM10B/TOMM22/GRPEL1/NDUFA13/SAE1/FBXO7/TSPO/MICALL2/MTX1/CHCHD4/TRMT10B	32
GO:0000070	mitotic sister chromatid segregation	49/2876	188/18888	0.260638	1.71173	4.15649	7.80056e-05	0.0047443	0.00430262	ANAPC11/LCMT1/CHMP2A/TPX2/AAAS/MAP9/BUB3/DUSP1/BECN1/MAD2L1/CCNB1/KNSTRN/NCAPH2/CDC20/SMC2/NCAPD2/NUSAP1/MAD2L1BP/CDK1/CHMP2B/CDT1/KNTC1/BIRC5/KIF11/KIFC1/MZT1/UBE2C/GEN1/UHRF1/MYBL2/AURKB/ABRAXAS1/MAP10/PLK1/TRIP13/SPICE1/TTK/ARHGEF10/ESPL1/NUF2/CENPI/KIF18A/CENPE/NDC80/KIF2C/KIF23/CENPK/AURKC/CDCA5	49
GO:1902099	regulation of metaphase/anaphase transition of cell cycle	29/2876	93/18888	0.311828	2.04792	4.29339	7.95933e-05	0.00479293	0.00434673	ANAPC11/LCMT1/SMARCA2/BUB3/BCL7C/DUSP1/MAD2L1/ACTL6A/CCNB1/BCL7B/CDC20/RIOK2/MAD2L1BP/KNTC1/BIRC5/UBE2C/GEN1/AURKB/SMARCD2/PLK1/TRIP13/TTK/ESPL1/NUF2/MAPK15/CENPE/MAP3K20/NDC80/CDC6	29
GO:1902749	regulation of cell cycle G2/M phase transition	34/2876	116/18888	0.293103	1.92494	4.23489	8.21727e-05	0.00486596	0.00441296	CDK5RAP3/MRNIP/CCNG1/TOPBP1/NABP2/NOP53/RINT1/CHEK1/CDC25A/MBTPS2/DONSON/RAD50/MTA3/CCNB1/CDK1/INIP/CDK2/AURKB/RRM2B/ABRAXAS1/ORC1/PLK1/RNASEH2B/DTL/WNT10B/DYRK3/MRE11/CLSPN/BRCA1/AURKA/CDC25C/CDC6/CDK6/RBBP8	34
GO:0009205	purine ribonucleoside triphosphate metabolic process	60/2876	244/18888	0.245902	1.61495	4.09748	8.24062e-05	0.00486596	0.00441296	ENO2/HK2/PRKACA/PKM/COL6A1/NDUFAB1/PGAM1/GPI/HK1/ENO1/NDUFV2/IMPDH2/NDUFB9/NDUFB7/NDUFC2/NDUFB2/NDUFA5/GNAI3/ATP5F1E/NME2/ATP1B1/DDIT4/PFKP/NME1/ALDOC/NDUFS8/NDUFB6/NDUFC1/ATP6V0C/NDUFA7/EIF6/ATP5MC3/FOXK2/NDUFV3/PINK1/RHOQ/NDUFA6/STOML2/NDUFA12/ATP5PO/NDUFA13/ATP5ME/ENTPD7/LIPA/AK4/SLC25A13/GCK/NME6/PRKAA2/NDUFB3/ADPGK/UQCC3/TSPO/UCP2/TIGAR/BEND3/PGM1/PRXL2C/ENO3/PPARA	60
GO:0006364	rRNA processing	56/2876	224/18888	0.25	1.64186	4.0956	8.70467e-05	0.00499527	0.00453023	RIOK3/NHP2/GTF2H5/DDX18/DROSHA/PRKDC/EBNA1BP2/EIF4A3/EIF6/WDR75/NUDT16/NAT10/PES1/NOC4L/WDR18/METTL15/NOP53/USP36/TRMT112/WDR55/NOL7/GEMIN4/DDX54/EXOSC7/REXO4/DDX51/UTP23/EXOSC8/METTL5/RRP12/TBL3/FCF1/URB1/NOP10/RIOK1/NPM3/RPF2/PIH1D1/MPHOSPH10/RIOK2/WBP11/LSM6/POP4/IMP3/MAK16/SBDS/FRG1/FTSJ3/RPUSD2/MRM2/NIFK/TFB2M/RPP40/SHQ1/SUV39H1/MRM1	56
GO:0001843	neural tube closure	28/2876	89/18888	0.314607	2.06617	4.27273	8.82238e-05	0.00499527	0.00453023	PRKACA/SPINT2/RGMA/DEAF1/TMED2/CDK20/LHX2/APAF1/BBS4/IFT57/PTCH1/TSC1/BCL10/FZD2/MTHFR/LIAS/KDM2B/CELSR1/MKS1/PTK7/TEAD2/FUZ/SUFU/LRP2/FZD6/CC2D2A/SFRP2/TRIM71	28
GO:0006735	NADH regeneration	10/2876	18/18888	0.555556	3.64859	4.7645	8.87026e-05	0.00499527	0.00453023	ENO2/HK2/PKM/PGAM1/HK1/ENO1/PFKP/FOXK2/GCK/ENO3	10
GO:0061621	canonical glycolysis	10/2876	18/18888	0.555556	3.64859	4.7645	8.87026e-05	0.00499527	0.00453023	ENO2/HK2/PKM/PGAM1/HK1/ENO1/PFKP/FOXK2/GCK/ENO3	10
GO:0061718	glucose catabolic process to pyruvate	10/2876	18/18888	0.555556	3.64859	4.7645	8.87026e-05	0.00499527	0.00453023	ENO2/HK2/PKM/PGAM1/HK1/ENO1/PFKP/FOXK2/GCK/ENO3	10
GO:0007008	outer mitochondrial membrane organization	9/2876	15/18888	0.6	3.94047	4.82831	9.05549e-05	0.00500686	0.00454075	TOMM5/TOMM20/TOMM6/TOMM70/TOMM40/SAMM50/HSPA4/TOMM22/MTX1	9
GO:0045040	protein insertion into mitochondrial outer membrane	9/2876	15/18888	0.6	3.94047	4.82831	9.05549e-05	0.00500686	0.00454075	TOMM5/TOMM20/TOMM6/TOMM70/TOMM40/SAMM50/HSPA4/TOMM22/MTX1	9
GO:0009142	nucleoside triphosphate biosynthetic process	36/2876	126/18888	0.285714	1.87642	4.1832	9.23639e-05	0.00506088	0.00458973	CTPS2/NDUFAB1/ENO1/NDUFV2/IMPDH2/NDUFB9/NDUFB7/NDUFC2/NDUFB2/NDUFA5/ATP5F1E/NME2/NME1/NDUFS8/NDUFB6/NDUFC1/ATP6V0C/NDUFA7/ATP5MC3/NDUFV3/PINK1/NDUFA6/STOML2/NDUFA12/ATP5PO/NDUFA13/ATP5ME/TYMS/LIPA/DTYMK/AK4/SLC25A13/NME6/NDUFB3/UQCC3/PPARA	36
GO:0009314	response to radiation	95/2876	431/18888	0.220418	1.44758	3.98368	9.32391e-05	0.00506322	0.00459185	BCL2L1/COL6A1/UVSSA/CDKN2D/UNC119/PER1/GTF2H5/DDB1/MRNIP/RO60/RBX1/GRB2/TIMP1/ERCC1/PRKDC/TNKS1BP1/TOPBP1/SDF4/MSH6/RHNO1/NABP2/XRCC6/GNB5/RUVBL2/PITPNM1/RIC8A/NR2F6/ALAD/TH/UBE2A/CBL/ZBTB1/CDC25A/RNF8/CRYAB/BHLHE40/WRN/CLOCK/RDH13/EIF2AK4/FEN1/CRY1/AEN/CDK5/CYP2R1/ERCC5/PPID/SOD2/YAP1/SMPD1/RNF168/DRD2/RHBDD1/GADD45A/TRIAP1/TSPYL5/PDE1B/TAFA2/PTPRK/CAMKMT/NETO1/FANCG/TP53I13/INIP/POLH/PDE6B/PCLA…	95
GO:0051983	regulation of chromosome segregation	37/2876	131/18888	0.282443	1.85493	4.16138	9.68434e-05	0.0052124	0.00472715	ANAPC11/LCMT1/SMARCA2/BUB3/BCL7C/DUSP1/BECN1/MAD2L1/ACTL6A/SMC5/CCNB1/BCL7B/NCAPH2/CDC20/RIOK2/SMC2/NCAPD2/MAD2L1BP/CDK1/KNTC1/BIRC5/MKI67/UBE2C/GEN1/AURKB/SMARCD2/PLK1/TRIP13/TTK/ESPL1/NUF2/MAPK15/CENPE/MAP3K20/NDC80/KIF2C/CDC6	37
GO:0019646	aerobic electron transport chain	29/2876	94/18888	0.308511	2.02613	4.22678	9.85516e-05	0.00525782	0.00476833	NDUFA4/NDUFAB1/COX6A1/COX7A2L/NDUFV2/NDUFB9/NDUFB7/NDUFC2/COX6C/NDUFB2/NDUFA5/COX5B/NDUFS8/NDUFB6/NDUFC1/COX8A/NDUFA7/COX4I1/CYC1/UQCR11/NDUFV3/ISCU/PINK1/NDUFA6/COQ9/CYCS/NDUFB3/UQCC3/UQCRHL	29
GO:0009199	ribonucleoside triphosphate metabolic process	61/2876	251/18888	0.243028	1.59607	4.02905	0.000103246	0.00546039	0.00495205	ENO2/HK2/CTPS2/PRKACA/PKM/COL6A1/NDUFAB1/PGAM1/GPI/HK1/ENO1/NDUFV2/IMPDH2/NDUFB9/NDUFB7/NDUFC2/NDUFB2/NDUFA5/GNAI3/ATP5F1E/NME2/ATP1B1/DDIT4/PFKP/NME1/ALDOC/NDUFS8/NDUFB6/NDUFC1/ATP6V0C/NDUFA7/EIF6/ATP5MC3/FOXK2/NDUFV3/PINK1/RHOQ/NDUFA6/STOML2/NDUFA12/ATP5PO/NDUFA13/ATP5ME/ENTPD7/LIPA/AK4/SLC25A13/GCK/NME6/PRKAA2/NDUFB3/ADPGK/UQCC3/TSPO/UCP2/TIGAR/BEND3/PGM1/PRXL2C/ENO3/PPARA	61
GO:0070085	glycosylation	59/2876	241/18888	0.244813	1.6078	4.02456	0.000107188	0.00551264	0.00499944	ALG13/MLEC/DDOST/STT3A/COG3/DAD1/SERP1/GALNT2/GALNT1/GALNT16/OST4/UBE2J1/GALNT11/GFPT1/RPN1/GALNT9/DPY19L3/MAN2A1/NANS/ALG3/TET1/DPM1/MAN2A2/DHDDS/COG5/COG1/VEGFB/B4GALT7/ALG2/ALG5/COG6/GORASP1/MGAT1/RFT1/GFPT2/ALG8/FUT11/OSTC/MOGS/GAL3ST1/B4GALT6/DPAGT1/GALNT7/DPM3/GALNT13/DPY19L1/ALG1/XXYLT1/B4GALT4/EOGT/C1GALT1/GALNT18/MAGT1/FUT5/GALNT12/DERL3/ST6GALNAC4/MAN1C1/POGLUT3	59
GO:0048285	organelle fission	106/2876	493/18888	0.21501	1.41207	3.92914	0.000107191	0.00551264	0.00499944	ANAPC11/OBSL1/UBE2I/PSMD13/GDAP1/DDB1/LCMT1/CHMP2A/CALR/MLH1/ORC4/TPX2/TOM1L2/AAAS/MAP9/SLC25A46/FOXJ3/CKS2/P3H4/PINK1/BUB3/CHEK1/BMP7/DAPK3/ACTR2/DUSP1/RMI1/BECN1/RAD50/L3MBTL1/MLH3/MAD2L1/CENPX/CCNB1/KNSTRN/CCDC8/INF2/MTFP1/CENPS/NCAPH2/CDC20/BORA/NME6/SMC2/NCAPD2/NUSAP1/CDKN1C/MAD2L1BP/PRMT5/CTDP1/LRP5/ACOT8/CDK1/CHMP2B/CDT1/KNTC1/NDC1/CCNB2/BIRC5/MKI67/ASPM/CCNA1/KIF11/KIFC1/MZT1/UBE2C/GEN1/U…	106
GO:0006734	NADH metabolic process	14/2876	32/18888	0.4375	2.87326	4.49471	0.000108051	0.00551264	0.00499944	ENO2/HK2/PKM/PGAM1/HK1/ENO1/MDH2/PFKP/MDH1/FOXK2/GPD2/GCK/PCK2/ENO3	14
GO:0010972	negative regulation of G2/M transition of mitotic cell cycle	23/2876	68/18888	0.338235	2.22135	4.27598	0.000108169	0.00551264	0.00499944	CDK5RAP3/MRNIP/CCNG1/TOPBP1/NABP2/NOP53/RINT1/CHEK1/MBTPS2/DONSON/RAD50/CDK1/INIP/AURKB/ABRAXAS1/ORC1/PLK1/DTL/MRE11/CLSPN/BRCA1/CDC6/RBBP8	23
GO:0030071	regulation of mitotic metaphase/anaphase transition	28/2876	90/18888	0.311111	2.04321	4.20426	0.000109673	0.00551264	0.00499944	ANAPC11/LCMT1/SMARCA2/BUB3/BCL7C/DUSP1/MAD2L1/ACTL6A/CCNB1/BCL7B/CDC20/RIOK2/MAD2L1BP/KNTC1/BIRC5/UBE2C/GEN1/AURKB/SMARCD2/PLK1/TRIP13/TTK/ESPL1/NUF2/CENPE/MAP3K20/NDC80/CDC6	28
GO:0060606	tube closure	28/2876	90/18888	0.311111	2.04321	4.20426	0.000109673	0.00551264	0.00499944	PRKACA/SPINT2/RGMA/DEAF1/TMED2/CDK20/LHX2/APAF1/BBS4/IFT57/PTCH1/TSC1/BCL10/FZD2/MTHFR/LIAS/KDM2B/CELSR1/MKS1/PTK7/TEAD2/FUZ/SUFU/LRP2/FZD6/CC2D2A/SFRP2/TRIM71	28
GO:0033045	regulation of sister chromatid segregation	31/2876	104/18888	0.298077	1.95761	4.15014	0.000117966	0.00579095	0.00525184	ANAPC11/LCMT1/SMARCA2/BUB3/BCL7C/DUSP1/BECN1/MAD2L1/ACTL6A/CCNB1/BCL7B/CDC20/RIOK2/MAD2L1BP/CDK1/KNTC1/BIRC5/UBE2C/GEN1/AURKB/SMARCD2/PLK1/TRIP13/TTK/ESPL1/NUF2/MAPK15/CENPE/MAP3K20/NDC80/CDC6	31
GO:0000724	double-strand break repair via homologous recombination	46/2876	176/18888	0.261364	1.71649	4.04727	0.000118375	0.00579095	0.00525184	MORF4L2/MRNIP/RNF138/MAGEF1/ZSWIM7/RADX/TOPBP1/NABP2/RUVBL2/DMAP1/CHEK1/ACTR2/RPA1/RMI1/WRN/PSMD14/RIF1/ACTL6A/SMC5/FEN1/ERCC5/MCM6/RECQL4/MCM2/FBH1/TIMELESS/INIP/AP5Z1/GEN1/UHRF1/TONSL/GINS2/AP5S1/RFWD3/RPA3/FANCM/FANCB/MCM5/ZNF365/MRE11/BRCA2/RAD51AP1/BRCA1/SWSAP1/RAD54L/RBBP8	46
GO:0001701	in utero embryonic development	89/2876	401/18888	0.221945	1.45761	3.92547	0.000118578	0.00579095	0.00525184	HM13/AMOT/BCL2L1/ZMIZ1/EGLN1/GPI/RCN1/RBPJ/SPINT2/FZD5/DAD1/MAP2K1/SEC24C/GRB2/C1orf43/TAF10/TMED2/CAPN2/BRK1/XAB2/SEC24D/GGNBP2/MAN2A1/PSMC4/SMIM14/AGBL4/VEGFA/RIC8A/TCTN1/UNK/BCOR/WDTC1/CHEK1/TET1/BMP7/B9D1/ZFP36L1/HDAC3/RBBP6/NSDHL/PPP4R4/ETNK2/PTCH1/NXN/PEMT/MGAT1/ENDOG/SOX8/CIR1/ACTL6A/CCNB1/TMEM231/LATS1/YAP1/CPT2/CDKN1C/SMO/ACVR1/YBX3/PELO/FKBP10/LEF1/CCNB2/TTLL4/ZPR1/SBDS/GINS1/NOTCH1/SMA…	89
GO:1901136	carbohydrate derivative catabolic process	65/2876	273/18888	0.238095	1.56368	3.9759	0.000119018	0.00579095	0.00525184	ENO2/HK2/PRKACA/PKM/COL6A1/SCARB2/GPC1/PGAM1/GPI/HK1/ENO1/HINT1/DDIT4/PFKP/ALDOC/FUCA1/NAGK/GNS/NEIL2/EIF6/NUDT16/CST3/FOXK2/ABHD10/GALC/DCTPP1/GNPDA1/CTSL/NT5C/ADA2/MGAT1/MANBA/ENTPD7/LIPA/GLB1/NGLY1/UNG/MBD4/NUDT7/FUCA2/GCK/PRKAA2/SMPD1/ADPGK/NT5M/MLYCD/EDEM2/ACAT1/UPP1/FBXO17/UCP2/TIGAR/NUDT19/PGM1/DERA/CTBS/CDADC1/GM2A/MAN1C1/PDE8A/PRXL2C/NUDT8/ENO3/SUCLG2/PPARA	65
GO:0014020	primary neural tube formation	29/2876	95/18888	0.305263	2.0048	4.161	0.000121463	0.00586298	0.00531716	PRKACA/SPINT2/RGMA/DEAF1/TMED2/CDK20/LHX2/APAF1/BMP7/BBS4/IFT57/PTCH1/TSC1/BCL10/FZD2/MTHFR/LIAS/KDM2B/CELSR1/MKS1/PTK7/TEAD2/FUZ/SUFU/LRP2/FZD6/CC2D2A/SFRP2/TRIM71	29
GO:0001838	embryonic epithelial tube formation	35/2876	123/18888	0.284553	1.86879	4.0968	0.000125473	0.00600888	0.00544948	PRKACA/SPINT2/RGMA/DEAF1/TMED2/CDK20/LHX2/APAF1/TCTN1/BMP7/BBS4/HES5/IFT57/PTCH1/TSC1/BCL10/SOX8/FZD2/MTHFR/LIAS/KDM2B/CELSR1/MKS1/PTK7/SOX9/TEAD2/FUZ/SUFU/LRP2/WNT4/RET/FZD6/CC2D2A/SFRP2/TRIM71	35
GO:0045839	negative regulation of mitotic nuclear division	20/2876	56/18888	0.357143	2.34552	4.27355	0.000128132	0.00608828	0.00552149	LCMT1/TOM1L2/BUB3/CHEK1/BMP7/DUSP1/MAD2L1/CCNB1/CDC20/NME6/MAD2L1BP/KNTC1/BIRC5/GEN1/AURKB/PLK1/TRIP13/TTK/NUF2/NDC80	20
GO:0017004	cytochrome complex assembly	16/2876	40/18888	0.4	2.62698	4.36549	0.000129619	0.00611116	0.00554224	COX16/SURF1/COA3/COX18/SLC25A46/COX14/SLC25A33/COX17/SMIM20/COA5/HCCS/COA6/COA1/UQCC3/SCO2/TMEM223	16
GO:0000079	regulation of cyclin-dependent protein serine/threonine kinase activity	25/2876	78/18888	0.320513	2.10495	4.14429	0.000148329	0.00693953	0.00629349	PSMD10/CCNI/CDKN2D/CDC37/CDK5RAP3/CCNK/CCNG1/CCNT1/CDC25A/CCNB1/LATS1/CDKN1C/GADD45A/CDK5RAP1/CCNB2/CDK7/CCNA1/CCNJ/PLK1/CDKN3/CCNE2/CDC25C/CDC6/CCNB3/TFAP4	25
GO:0016052	carbohydrate catabolic process	42/2876	158/18888	0.265823	1.74578	3.98954	0.000153327	0.0071186	0.00645589	ENO2/HK2/PRKACA/PKM/COL6A1/SCARB2/PGAM1/GPI/HK1/ENO1/PYGB/DDIT4/PFKP/ALDOC/EIF6/GALE/FOXK2/MANBA/LIPA/GLB1/PHKG2/GPD2/GCK/PRKAA2/ADPGK/LRP5/PPP1R3D/MAN2B1/UCP2/TIGAR/STBD1/IDNK/PGM1/DERA/CTBS/FUT5/GM2A/PRXL2C/PGM2/ENO3/RBKS/PPARA	42
GO:0031570	DNA integrity checkpoint signaling	37/2876	134/18888	0.276119	1.8134	4.00464	0.000161161	0.00742564	0.00673434	CDK5RAP3/MRNIP/PRKDC/CCNG1/TOPBP1/RHNO1/NOP53/RINT1/CHEK1/CEP63/MBTPS2/DONSON/CLOCK/EIF2AK4/CRY1/TRIAP1/CDK1/CDT1/TIMELESS/CDK2/E2F1/ABRAXAS1/ORC1/RFWD3/PLK1/RNASEH2B/DTL/ATRIP/MRE11/BRCA2/CLSPN/BRCA1/MAP3K20/E2F7/CDC6/EME1/FBXO4	37
GO:0072594	establishment of protein localization to organelle	98/2876	454/18888	0.215859	1.41764	3.81749	0.000164844	0.00753822	0.00683644	BNIP3L/HK2/USP9X/PTTG1IP/SCARB2/ROMO1/TOMM5/HK1/NUP58/TSG101/TOMM20/HSPD1/PAM16/SEC61B/FZD5/UBE2D3/TOMM6/TOMM70/GDAP1/CLU/TCP1/AP3D1/TOMM40/MOAP1/IMMP1L/UFM1/NUTF2/SPCS1/SEC61A2/SGTA/SNF8/PITRM1/TRAM1/OXA1L/COX18/TNPO1/GNPTAB/DDIT3/PTPN23/NUP54/PARL/HSPA5/CCT8/SEC63/NUP133/NABP2/ACD/LMAN1/RUVBL2/SGTB/RNF31/PINK1/USP36/DMAP1/SAMM50/HSPA4/SSR3/TIMM10B/SEC13/HDAC3/TOMM22/CBL/GRPEL1/GNPTG/NDUFA13/APP…	98
GO:1902750	negative regulation of cell cycle G2/M phase transition	23/2876	70/18888	0.328571	2.15788	4.11318	0.000177647	0.00806306	0.00731242	CDK5RAP3/MRNIP/CCNG1/TOPBP1/NABP2/NOP53/RINT1/CHEK1/MBTPS2/DONSON/RAD50/CDK1/INIP/AURKB/ABRAXAS1/ORC1/PLK1/DTL/MRE11/CLSPN/BRCA1/CDC6/RBBP8	23
GO:1901142	insulin metabolic process	9/2876	16/18888	0.5625	3.69419	4.56912	0.000178973	0.00806306	0.00731242	PCSK1/P4HB/YIPF5/CTSD/SLC30A5/PCSK2/PAX6/ERN1/FOSL2	9
GO:0044784	metaphase/anaphase transition of cell cycle	29/2876	97/18888	0.298969	1.96347	4.03181	0.000182046	0.00810551	0.00735092	ANAPC11/LCMT1/SMARCA2/BUB3/BCL7C/DUSP1/MAD2L1/ACTL6A/CCNB1/BCL7B/CDC20/RIOK2/MAD2L1BP/KNTC1/BIRC5/UBE2C/GEN1/AURKB/SMARCD2/PLK1/TRIP13/TTK/ESPL1/NUF2/MAPK15/CENPE/MAP3K20/NDC80/CDC6	29
GO:0031297	replication fork processing	18/2876	49/18888	0.367347	2.41253	4.19586	0.000182581	0.00810551	0.00735092	DONSON/RAD50/WRN/CENPX/CENPS/FBH1/GEN1/TONSL/RFWD3/FANCM/ZRANB3/ZNF365/PRIMPOL/MRE11/BRCA2/BRCA1/RBBP8/EME1	18
GO:1903573	negative regulation of response to endoplasmic reticulum stress	17/2876	45/18888	0.377778	2.48104	4.21552	0.000184788	0.00814407	0.00738589	BCL2L1/GRINA/USP14/CREB3/CLU/XBP1/SELENOS/SGTA/DDRGK1/DNAJB9/HSPA5/CREB3L1/WFS1/LPCAT3/NR1H3/SVIP/TMBIM6	17
GO:0006486	protein glycosylation	55/2876	225/18888	0.244444	1.60538	3.87151	0.000187706	0.0081545	0.00739535	ALG13/MLEC/DDOST/STT3A/COG3/DAD1/SERP1/GALNT2/GALNT1/GALNT16/OST4/UBE2J1/GALNT11/GFPT1/RPN1/GALNT9/DPY19L3/MAN2A1/ALG3/TET1/DPM1/MAN2A2/DHDDS/VEGFB/B4GALT7/ALG2/ALG5/GORASP1/MGAT1/RFT1/GFPT2/ALG8/FUT11/OSTC/MOGS/GAL3ST1/B4GALT6/DPAGT1/GALNT7/DPM3/GALNT13/DPY19L1/ALG1/XXYLT1/B4GALT4/EOGT/C1GALT1/GALNT18/MAGT1/FUT5/GALNT12/DERL3/ST6GALNAC4/MAN1C1/POGLUT3	55
GO:0043413	macromolecule glycosylation	55/2876	225/18888	0.244444	1.60538	3.87151	0.000187706	0.0081545	0.00739535	ALG13/MLEC/DDOST/STT3A/COG3/DAD1/SERP1/GALNT2/GALNT1/GALNT16/OST4/UBE2J1/GALNT11/GFPT1/RPN1/GALNT9/DPY19L3/MAN2A1/ALG3/TET1/DPM1/MAN2A2/DHDDS/VEGFB/B4GALT7/ALG2/ALG5/GORASP1/MGAT1/RFT1/GFPT2/ALG8/FUT11/OSTC/MOGS/GAL3ST1/B4GALT6/DPAGT1/GALNT7/DPM3/GALNT13/DPY19L1/ALG1/XXYLT1/B4GALT4/EOGT/C1GALT1/GALNT18/MAGT1/FUT5/GALNT12/DERL3/ST6GALNAC4/MAN1C1/POGLUT3	55
GO:0001841	neural tube formation	30/2876	102/18888	0.294118	1.9316	3.99823	0.00019605	0.00845658	0.00766931	PRKACA/SPINT2/RGMA/DEAF1/TMED2/CDK20/LHX2/APAF1/TCTN1/BMP7/BBS4/IFT57/PTCH1/TSC1/BCL10/FZD2/MTHFR/LIAS/KDM2B/CELSR1/MKS1/PTK7/TEAD2/FUZ/SUFU/LRP2/FZD6/CC2D2A/SFRP2/TRIM71	30
GO:1901991	negative regulation of mitotic cell cycle phase transition	49/2876	195/18888	0.251282	1.65028	3.86842	0.000204164	0.00874456	0.00793047	CDK5RAP3/LCMT1/MRNIP/PRKDC/CCNG1/TOPBP1/NABP2/NOP53/RINT1/BUB3/CHEK1/ZFP36L1/MBTPS2/DUSP1/DONSON/TPRA1/RAD50/MAD2L1/CCNB1/CDC20/ACVR1/MAD2L1BP/TRIAP1/CDK1/KNTC1/FBXO7/BIRC5/CDK2AP2/INIP/CDK2/ZFP36L2/GEN1/BTN2A2/AURKB/ABRAXAS1/ORC1/RFWD3/PLK1/DTL/TRIP13/TTK/MRE11/NUF2/CLSPN/BRCA1/NDC80/E2F7/CDC6/RBBP8	49
GO:0015931	nucleobase-containing compound transport	56/2876	231/18888	0.242424	1.59211	3.83743	0.000207727	0.00883495	0.00801245	G3BP2/ALKBH5/NUP58/TOMM20/SLC25A4/SHOC2/PEG10/SLC25A36/CHTOP/NUTF2/EIF4A3/AAAS/NUP54/SLBP/NUP133/RTRAF/EIF4E/SLC25A24/NUP43/ENY2/SLC25A32/SEC13/ZFP36L1/GLE1/FLOT1/NUP210/SLC35A5/NCBP1/FYTTD1/DDX39A/SLC33A1/ALYREF/ABCC1/SLC25A33/MAGOH/NUP98/SARNP/SLC25A26/ZC3H3/PARP11/SLC35B3/NXT1/SLC35A3/CETN2/NUP50/NUP37/SMG7/NDC1/NXT2/SLC25A53/TST/ABCC4/SLC35D2/MAGOHB/ZFP36/SLC35A2	56
GO:1901988	negative regulation of cell cycle phase transition	64/2876	273/18888	0.234432	1.53962	3.80622	0.000213074	0.00896432	0.00812978	CDKN2D/CDK5RAP3/LCMT1/MRNIP/PRKDC/CCNG1/TOPBP1/RHNO1/NABP2/NOP53/RINT1/BUB3/CHEK1/ZFP36L1/CEP63/MBTPS2/DUSP1/DONSON/TPRA1/RAD50/MAD2L1/CLOCK/CCNB1/EIF2AK4/CRY1/CDC20/ACVR1/MAD2L1BP/TRIAP1/CDK1/CDT1/KNTC1/FBXO7/BIRC5/TIMELESS/CDK2AP2/INIP/CDK2/E2F1/ZFP36L2/GEN1/BTN2A2/AURKB/ABRAXAS1/ORC1/RFWD3/PLK1/RNASEH2B/DTL/ATRIP/TRIP13/TTK/MRE11/BRCA2/NUF2/CLSPN/BRCA1/MAP3K20/NDC80/E2F7/CDC6/RBBP8/EME1/FBXO4	64
GO:0008535	respiratory chain complex IV assembly	13/2876	30/18888	0.433333	2.8459	4.28818	0.000213717	0.00896432	0.00812978	COX16/SURF1/COA3/COX18/SLC25A46/COX14/COX17/SMIM20/COA5/COA6/COA1/SCO2/TMEM223	13
GO:0051028	mRNA transport	36/2876	131/18888	0.274809	1.8048	3.91736	0.000217365	0.00905489	0.00821192	G3BP2/ALKBH5/NUP58/PEG10/CHTOP/NUTF2/EIF4A3/AAAS/NUP54/SLBP/NUP133/EIF4E/NUP43/ENY2/SEC13/ZFP36L1/GLE1/NUP210/NCBP1/FYTTD1/DDX39A/ALYREF/MAGOH/NUP98/SARNP/ZC3H3/PARP11/NXT1/CETN2/NUP50/NUP37/SMG7/NDC1/NXT2/MAGOHB/ZFP36	36
GO:0009206	purine ribonucleoside triphosphate biosynthetic process	32/2876	112/18888	0.285714	1.87642	3.94249	0.000220695	0.00913106	0.00828099	NDUFAB1/ENO1/NDUFV2/IMPDH2/NDUFB9/NDUFB7/NDUFC2/NDUFB2/NDUFA5/ATP5F1E/NME2/NME1/NDUFS8/NDUFB6/NDUFC1/ATP6V0C/NDUFA7/ATP5MC3/NDUFV3/PINK1/NDUFA6/STOML2/NDUFA12/ATP5PO/NDUFA13/ATP5ME/LIPA/SLC25A13/NME6/NDUFB3/UQCC3/PPARA	32
GO:0016236	macroautophagy	77/2876	343/18888	0.22449	1.47433	3.7572	0.000227552	0.00935115	0.0084806	BNIP3L/MAP1LC3B/PRKACA/RNF5/TSG101/VDAC1/EI24/SLC25A4/CDC37/GNAI3/FZD5/ATP6V0D1/ATG4A/MFSD8/RAB5A/CHMP2A/CAPNS1/MOAP1/TMEM41B/GABARAPL2/UFM1/RETREG2/WDR45B/ATP6V0C/SNF8/DDRGK1/UVRAG/RNF41/PACS2/WIPI2/NRBP2/PARL/ARFIP2/TMEM39A/SNX30/RNF31/PINK1/USP36/C9orf72/PLAA/SPTLC1/ATG9A/CTSD/SESN1/SNAPIN/BECN1/WDR24/TSC1/MTMR14/VPS33A/EMC6/ATG101/CDK5/CALM1/RAB33B/PRKAA2/CHMP2B/WIPI1/TOM1/ULK3/ATP6V0E1/FBXO7…	77
GO:0007006	mitochondrial membrane organization	33/2876	117/18888	0.282051	1.85236	3.91945	0.00023124	0.00943896	0.00856023	BNIP3L/HK2/BCL2L1/ROMO1/TOMM5/CHCHD6/TOMM20/SLC25A4/TOMM6/TOMM70/TOMM40/MOAP1/CHCHD3/OXA1L/COX18/VDAC2/SLC25A46/HSPA9/PINK1/SAMM50/HSPA4/SLC35F6/TIMM10B/TOMM22/NDUFA13/GCLC/PPIF/UQCC3/MPV17L/MTX1/THEM4/SLC9A1/TRMT10B	33
GO:0008652	amino acid biosynthetic process	22/2876	67/18888	0.328358	2.15648	4.01889	0.000246191	0.00998222	0.00905291	GOT2/PSAT1/ALDH18A1/SEPHS2/SEPHS1/APIP/PLOD2/GOT1/PYCR2/SHMT2/SRR/ASNSD1/MTHFR/MRI1/AASS/OAT/MTRR/ASS1/PYCR3/CTH/MTAP/SHMT1	22
GO:0007091	metaphase/anaphase transition of mitotic cell cycle	28/2876	94/18888	0.297872	1.95626	3.93899	0.000249742	0.0100591	0.00912267	ANAPC11/LCMT1/SMARCA2/BUB3/BCL7C/DUSP1/MAD2L1/ACTL6A/CCNB1/BCL7B/CDC20/RIOK2/MAD2L1BP/KNTC1/BIRC5/UBE2C/GEN1/AURKB/SMARCD2/PLK1/TRIP13/TTK/ESPL1/NUF2/CENPE/MAP3K20/NDC80/CDC6	28
GO:0042594	response to starvation	52/2876	212/18888	0.245283	1.61089	3.79087	0.000252972	0.0101222	0.00917988	MAP1LC3B/SLC2A1/FADS1/LRP11/XBP1/RIPOR1/GABARAPL2/WDR45B/EIF2AK1/MFSD2A/EIF2A/WIPI2/DDIT3/MYBBP1A/FOXK2/HSPA5/DAP/GCN1/GNPAT/TBL2/ADSL/CBL/SESN1/EIF2AK3/BCAS3/BECN1/WDR24/TSC1/WRN/GPR155/NPRL2/EIF2AK4/SP1/PRKAA2/WIPI1/PCK2/ULK3/ACAT1/UPP1/NUAK2/PRKD1/WNT4/UCP2/FOXO1/PLIN3/WDR45/ZFP36/CASTOR1/SUV39H1/STK26/SSTR2/PPARA	52
GO:0009145	purine nucleoside triphosphate biosynthetic process	32/2876	113/18888	0.283186	1.85981	3.88512	0.000263563	0.0104771	0.00950168	NDUFAB1/ENO1/NDUFV2/IMPDH2/NDUFB9/NDUFB7/NDUFC2/NDUFB2/NDUFA5/ATP5F1E/NME2/NME1/NDUFS8/NDUFB6/NDUFC1/ATP6V0C/NDUFA7/ATP5MC3/NDUFV3/PINK1/NDUFA6/STOML2/NDUFA12/ATP5PO/NDUFA13/ATP5ME/LIPA/SLC25A13/NME6/NDUFB3/UQCC3/PPARA	32
GO:0051783	regulation of nuclear division	39/2876	147/18888	0.265306	1.74239	3.82953	0.000270109	0.0106676	0.00967446	ANAPC11/OBSL1/LCMT1/CALR/TOM1L2/BUB3/CHEK1/BMP7/DAPK3/DUSP1/L3MBTL1/MAD2L1/CCNB1/CCDC8/CDC20/BORA/NME6/NUSAP1/MAD2L1BP/PRMT5/LRP5/KNTC1/BIRC5/MKI67/UBE2C/GEN1/AURKB/WNT4/RCC1/PLK1/TRIP13/TTK/ESPL1/NUF2/RAD51AP1/AURKA/PDGFB/NDC80/CDC25C	39
GO:0009201	ribonucleoside triphosphate biosynthetic process	33/2876	118/18888	0.279661	1.83666	3.86377	0.000274771	0.0107816	0.00977791	CTPS2/NDUFAB1/ENO1/NDUFV2/IMPDH2/NDUFB9/NDUFB7/NDUFC2/NDUFB2/NDUFA5/ATP5F1E/NME2/NME1/NDUFS8/NDUFB6/NDUFC1/ATP6V0C/NDUFA7/ATP5MC3/NDUFV3/PINK1/NDUFA6/STOML2/NDUFA12/ATP5PO/NDUFA13/ATP5ME/LIPA/SLC25A13/NME6/NDUFB3/UQCC3/PPARA	33
GO:0006007	glucose catabolic process	12/2876	27/18888	0.444444	2.91887	4.22861	0.000280204	0.0109244	0.00990736	ENO2/HK2/PKM/PGAM1/HK1/ENO1/PFKP/FOXK2/GCK/LRP5/TIGAR/ENO3	12
GO:1904029	regulation of cyclin-dependent protein kinase activity	25/2876	81/18888	0.308642	2.02699	3.92557	0.00028746	0.0111359	0.0100992	PSMD10/CCNI/CDKN2D/CDC37/CDK5RAP3/CCNK/CCNG1/CCNT1/CDC25A/CCNB1/LATS1/CDKN1C/GADD45A/CDK5RAP1/CCNB2/CDK7/CCNA1/CCNJ/PLK1/CDKN3/CCNE2/CDC25C/CDC6/CCNB3/TFAP4	25
GO:0006303	double-strand break repair via nonhomologous end joining	22/2876	68/18888	0.323529	2.12476	3.93785	0.000312201	0.0119591	0.0108458	HMGB2/MRNIP/MLH1/ERCC1/DEK/PRKDC/UVRAG/PAXX/TOPBP1/RHNO1/XRCC6/RNF8/PSMD14/RIF1/RNF168/POLA1/DCLRE1A/PLK1/CYREN/MRE11/NHEJ1/XRCC4	22
GO:0016072	rRNA metabolic process	62/2876	266/18888	0.233083	1.53076	3.6947	0.000312644	0.0119591	0.0108458	RIOK3/NHP2/GTF2H5/DDX18/DROSHA/PRKDC/EBNA1BP2/EIF4A3/EIF6/WDR75/NUDT16/NAT10/PES1/NOC4L/POLR2E/WDR18/METTL15/NOP53/USP36/GTF3C1/TRMT112/ZCCHC7/WDR55/NOL7/GEMIN4/DDX54/EXOSC7/REXO4/DDX51/GTF3C4/UTP23/EXOSC8/METTL5/RRP12/TBL3/FCF1/URB1/NOP10/RIOK1/GTF3A/NPM3/RPF2/PIH1D1/MPHOSPH10/RIOK2/WBP11/LSM6/POP4/IMP3/PELO/MAK16/SBDS/FRG1/FTSJ3/RPUSD2/MRM2/NIFK/TFB2M/RPP40/SHQ1/SUV39H1/MRM1	62
GO:0051223	regulation of protein transport	94/2876	440/18888	0.213636	1.40305	3.62544	0.000322556	0.0122612	0.0111197	CDK16/NNAT/PRKACA/PCSK1/ACHE/NUP58/TSG101/MYH10/ACSL4/SEC24A/SERP1/OS9/ERLEC1/OAZ1/RIPOR1/APBB3/UBE2J1/UFM1/GNAZ/GPR27/TMED10/PRKCB/DPH3/DERL2/SIRT3/PTPN23/NUP54/TMEM97/OSBP/SERGEF/SYT4/DMAP1/SLC16A1/EFNA5/ENY2/CTDSPL2/HDAC3/DNAJC1/CD81/ERP29/PSMD9/GOLPH3L/CLOCK/UBAC2/BAIAP3/IRS2/NKX6-1/PIM3/AACS/IER3IP1/CDK5/PPID/RAB11FIP5/GCK/DOC2B/HADH/SMO/APOE/DRD2/SHH/TRH/LRP5/CDK1/RHBDD3/TCF7L2/PCK2/ANP32B/…	94
GO:0006120	mitochondrial electron transport, NADH to ubiquinone	18/2876	51/18888	0.352941	2.31793	3.99414	0.000325319	0.0122894	0.0111453	NDUFA4/NDUFAB1/NDUFV2/NDUFB9/NDUFB7/NDUFC2/NDUFB2/NDUFA5/NDUFS8/NDUFB6/NDUFC1/NDUFA7/NDUFV3/ISCU/PINK1/NDUFA6/COQ9/NDUFB3	18
GO:0045050	protein insertion into ER membrane by stop-transfer membrane-anchor sequence	7/2876	11/18888	0.636364	4.17929	4.47006	0.000352513	0.0131215	0.0118999	EMC7/EMC10/MMGT1/EMC3/EMC8/EMC6/EMC9	7
GO:0046349	amino sugar biosynthetic process	7/2876	11/18888	0.636364	4.17929	4.47006	0.000352513	0.0131215	0.0118999	GFPT1/UAP1/GNPDA1/GFPT2/GNE/GNPNAT1/NANP	7
GO:0045665	negative regulation of neuron differentiation	23/2876	73/18888	0.315068	2.0692	3.87901	0.000355544	0.0131215	0.0118999	SHOC2/DIXDC1/CALR/SOX3/EIF4E/BMP7/HES5/SOX8/EIF2AK4/RAP1GAP/DLL1/SHH/SOX9/ASCL1/NOTCH3/NOTCH1/ASPM/PTBP1/NR2E1/TUNAR/HEY1/PAX6/HES1	23
GO:0046034	ATP metabolic process	53/2876	220/18888	0.240909	1.58216	3.68093	0.000355975	0.0131215	0.0118999	ENO2/HK2/PRKACA/PKM/COL6A1/NDUFAB1/PGAM1/GPI/HK1/ENO1/NDUFV2/NDUFB9/NDUFB7/NDUFC2/NDUFB2/NDUFA5/ATP5F1E/ATP1B1/DDIT4/PFKP/ALDOC/NDUFS8/NDUFB6/NDUFC1/ATP6V0C/NDUFA7/EIF6/ATP5MC3/FOXK2/NDUFV3/PINK1/NDUFA6/STOML2/NDUFA12/ATP5PO/NDUFA13/ATP5ME/LIPA/AK4/SLC25A13/GCK/PRKAA2/NDUFB3/ADPGK/UQCC3/TSPO/UCP2/TIGAR/BEND3/PGM1/PRXL2C/ENO3/PPARA	53
GO:0085020	protein K6-linked ubiquitination	8/2876	14/18888	0.571429	3.75283	4.36681	0.00036208	0.0132192	0.0119885	UBE2D3/RNF4/RNF25/RNF14/WDR24/UBE2T/RNF6/BRCA1	8
GO:0035148	tube formation	39/2876	149/18888	0.261745	1.719	3.73423	0.00036349	0.0132192	0.0119885	PRKACA/SPINT2/RGMA/DEAF1/TMED2/CDK20/LHX2/APAF1/VEGFA/TCTN1/BMP7/BBS4/HES5/IFT57/PTCH1/TSC1/BCL10/SOX8/FZD2/MTHFR/LIAS/KDM2B/CELSR1/MKS1/PTK7/SHH/SOX9/TEAD2/FUZ/SUFU/LRP2/NOTCH1/WNT4/RET/FZD6/CC2D2A/PODXL/SFRP2/TRIM71	39
GO:0009411	response to UV	40/2876	154/18888	0.25974	1.70583	3.72735	0.000365147	0.0132192	0.0119885	COL6A1/UVSSA/CDKN2D/DDB1/RO60/RBX1/TIMP1/ERCC1/SDF4/MSH6/RHNO1/RUVBL2/UBE2A/ZBTB1/CDC25A/WRN/EIF2AK4/FEN1/ERCC5/PPID/SMPD1/RHBDD1/TRIAP1/PTPRK/TP53I13/POLH/PCLAF/AURKB/COL6A2/DTL/ZRANB3/PRIMPOL/NEDD4/BRCA2/DDB2/MAP3K20/CRIP1/SCARA3/MFAP4/NFATC4	40
GO:0010948	negative regulation of cell cycle process	71/2876	316/18888	0.224684	1.4756	3.61334	0.000380289	0.0136859	0.0124118	CDKN2D/CDK5RAP3/LCMT1/MRNIP/CHMP2A/PPP2R5B/PRKDC/CCNG1/TOM1L2/TOPBP1/RHNO1/NABP2/NOP53/RINT1/BUB3/CHEK1/BMP7/ZFP36L1/CEP63/MBTPS2/DUSP1/DONSON/TPRA1/RAD50/MAD2L1/CLOCK/CCNB1/TMEM67/EIF2AK4/CRY1/CDC20/NME6/ACVR1/MAD2L1BP/TRIAP1/CDK1/CDT1/KNTC1/FBXO7/BIRC5/TIMELESS/CDK2AP2/INIP/CDK2/E2F1/ZFP36L2/GEN1/BTN2A2/AURKB/ABRAXAS1/ORC1/RFWD3/PLK1/RNASEH2B/DTL/ATRIP/TRIP13/TTK/ESPL1/MRE11/BRCA2/NUF2/CLSPN/BR…	71
GO:0006403	RNA localization	49/2876	200/18888	0.245	1.60903	3.66963	0.000385803	0.0138027	0.0125177	G3BP2/ALKBH5/NUP58/NHP2/TOMM20/PEG10/TCP1/CHTOP/NUTF2/EIF4A3/AAAS/NUP54/CCT8/SLBP/FUBP3/NUP133/PARN/RTRAF/RUVBL2/EIF4E/NUP43/ENY2/SEC13/ZFP36L1/GLE1/FLOT1/NUP210/NCBP1/FYTTD1/DDX39A/ALYREF/MAGOH/NUP98/SARNP/NOP10/ZC3H3/PARP11/PIH1D1/NXT1/CETN2/NUP50/NUP37/SMG7/NDC1/NXT2/TST/MAGOHB/ZFP36/SHQ1	49
GO:0016050	vesicle organization	81/2876	371/18888	0.218329	1.43386	3.57692	0.0004032	0.0143407	0.0130057	AP1S2/SCARB2/TRAPPC4/PTPRN/SEC31A/TMEM9/TSG101/ATP6AP1/GRIK5/ATP6V0D1/SEC24A/CHMP2A/GOSR1/AP3D1/TMF1/SEC23A/ARFGAP3/TRAPPC3/SEC24C/RAB5B/RNASEK/TRAPPC11/TMED10/TRAPPC6A/ATP6V0C/SNF8/TMED2/UVRAG/SEC23B/PPP6C/SCAP/YIPF5/GOSR2/SEC24D/TMED9/OSBP/GBF1/TRAPPC9/SYT4/TRAPPC1/RAB22A/BLOC1S6/SEC13/TRAPPC13/STX2/NECTIN2/SYT9/ZDHHC20/SNAPIN/GOLPH3L/ARFGEF2/VAPB/KLHL12/VPS33A/RNF26/BAIAP3/ATP6AP2/SEPTIN8/TRAP…	81
GO:0072175	epithelial tube formation	36/2876	135/18888	0.266667	1.75132	3.71288	0.000409592	0.0144833	0.013135	PRKACA/SPINT2/RGMA/DEAF1/TMED2/CDK20/LHX2/APAF1/TCTN1/BMP7/BBS4/HES5/IFT57/PTCH1/TSC1/BCL10/SOX8/FZD2/MTHFR/LIAS/KDM2B/CELSR1/MKS1/PTK7/SOX9/TEAD2/FUZ/SUFU/LRP2/WNT4/RET/FZD6/CC2D2A/PODXL/SFRP2/TRIM71	36
GO:0016331	morphogenesis of embryonic epithelium	39/2876	150/18888	0.26	1.70754	3.68712	0.000420197	0.0147725	0.0133972	PRKACA/SPINT2/RGMA/DEAF1/LAMA5/TMED2/CDK20/LHX2/APAF1/TCTN1/BMP7/BBS4/HES5/IFT57/PTCH1/TSC1/BCL10/SOX8/FZD2/MTHFR/LIAS/KDM2B/SULF1/CELSR1/MKS1/PTK7/SHH/SOX9/TEAD2/FUZ/SUFU/LRP2/WNT4/RET/FZD6/CC2D2A/SFRP2/TRIM71/RDH10	39
GO:1905818	regulation of chromosome separation	23/2876	74/18888	0.310811	2.04124	3.80345	0.000442496	0.015467	0.0140271	ANAPC11/LCMT1/BUB3/DUSP1/MAD2L1/CCNB1/NCAPH2/CDC20/SMC2/NCAPD2/MAD2L1BP/KNTC1/BIRC5/UBE2C/GEN1/AURKB/PLK1/TRIP13/TTK/ESPL1/NUF2/MAPK15/NDC80	23
GO:0051656	establishment of organelle localization	99/2876	472/18888	0.209746	1.3775	3.51997	0.00044741	0.0155494	0.0141018	TRAPPC4/YKT6/DYNC1H1/RAB6A/COPG1/TSG101/STK25/CHMP2A/AP3D1/ARFGAP3/TRAPPC3/RIPOR1/ACTR10/MLH1/TRAPPC11/TMED10/TRAPPC6A/GAB2/SNF8/TMED2/NEFL/EIF6/PPP6C/TMED9/BBS7/EXOC2/GBF1/TRAPPC9/SYT4/TRAPPC1/PINK1/AGBL4/NMD3/BUB3/BLOC1S6/HDAC3/CBL/TRAPPC13/MAP1S/NECTIN2/DYNC1I1/SNAPIN/SAPCD2/BECN1/TSC1/MAD2L1/TMEM201/KLHL12/BAIAP3/CCNB1/KNSTRN/LSG1/TRAPPC2L/CDK5/AP3M2/ENKD1/RIOK2/NUSAP1/NLGN1/CHMP2B/WIPI1/CDT1…	99
GO:0090317	negative regulation of intracellular protein transport	13/2876	32/18888	0.40625	2.66803	4.00227	0.000460051	0.0157427	0.0142771	OS9/ERLEC1/UBE2J1/UFM1/DERL2/UBAC2/CDK5/SUFU/YOD1/CABP1/SVIP/DERL3/MDFIC	13
GO:0009067	aspartate family amino acid biosynthetic process	10/2876	21/18888	0.47619	3.12736	4.13383	0.000460736	0.0157427	0.0142771	GOT2/APIP/PLOD2/GOT1/ASNSD1/MTHFR/MRI1/AASS/MTRR/MTAP	10
GO:0019677	NAD catabolic process	10/2876	21/18888	0.47619	3.12736	4.13383	0.000460736	0.0157427	0.0142771	ENO2/HK2/PKM/PGAM1/HK1/ENO1/PFKP/FOXK2/GCK/ENO3	10
GO:1901976	regulation of cell cycle checkpoint	16/2876	44/18888	0.363636	2.38817	3.90692	0.000469643	0.0159003	0.0144201	LCMT1/DUSP1/MAD2L1/CCNB1/CRY1/MAD2L1BP/BIRC5/GEN1/AURKB/RFWD3/RNASEH2B/BRCA2/BRCA1/MAP3K20/NDC80/FBXO4	16
GO:0007052	mitotic spindle organization	35/2876	131/18888	0.267176	1.75466	3.67333	0.000470578	0.0159003	0.0144201	DYNC1H1/CHMP2A/TPX2/AAAS/MAP9/CLTC/MAP1S/CENPJ/CCNB1/CDC20/TBCE/BORA/CHMP2B/EML1/BIRC5/SBDS/KIF11/KIFC1/MZT1/UHRF1/MYBL2/AURKB/ABRAXAS1/MAP10/RCC1/PLK1/SPICE1/TTK/ARHGEF10/NUF2/AURKA/CENPE/NDC80/KIF23/AURKC	35
GO:0009101	glycoprotein biosynthetic process	72/2876	324/18888	0.222222	1.45943	3.5352	0.000485712	0.016321	0.0148016	ALG13/CHPF/MLEC/DDOST/STT3A/COG3/DAD1/SERP1/GALNT2/GALNT1/GALNT16/OST4/UBE2J1/GALNT11/GFPT1/NECAB2/RPN1/GALNT9/DPY19L3/MAN2A1/ALG3/TET1/DPM1/MAN2A2/DHDDS/VEGFB/AGO2/B4GALT7/ALG2/ALG5/GORASP1/MGAT1/CHPF2/TNIP1/RFT1/GFPT2/ALG8/NECAB3/FUT11/OSTC/CHST3/NCSTN/MOGS/GAL3ST1/B4GALT6/DPAGT1/GALNT7/DPM3/GALNT13/ACOT8/TCF7L2/SOAT1/DPY19L1/ALG1/XXYLT1/CHST7/B4GALT4/EOGT/C1GALT1/GALNT18/JAK3/CHST14/MAGT1/UST/…	72
GO:0060562	epithelial tube morphogenesis	74/2876	335/18888	0.220896	1.45072	3.52758	0.000491686	0.016431	0.0149013	PRKACA/RBPJ/SPINT2/RGMA/DEAF1/LAMA5/MAGED1/CXCR4/TMED2/CTNNBIP1/CDK20/PRKX/LHX2/MDK/CSNK2B/APAF1/BBS7/VEGFA/TCTN1/BMP7/BBS4/GZF1/HES5/IFT57/GPC3/PTCH1/AHI1/TSC1/BCL10/SOX8/FZD2/MTHFR/LGR5/LIAS/KDM2B/COL4A1/ILK/YAP1/CELSR1/DLL1/MKS1/PTK7/SMO/ACVR1/SHH/SOX9/LRP5/PRKD2/TEAD2/FUZ/SUFU/FOXP1/LEF1/MESP1/LRP2/TIMELESS/NOTCH1/SMAD3/CCM2/WNT4/RET/EYA1/FZD6/SALL1/NPHP3/NR3C1/CC2D2A/PODXL/SFRP2/TRIM71/RDH10…	74
GO:0045005	DNA-templated DNA replication maintenance of fidelity	19/2876	57/18888	0.333333	2.18915	3.81058	0.000515516	0.0171331	0.0155381	DONSON/RAD50/WRN/CENPX/CENPS/FBH1/TIMELESS/GEN1/TONSL/RFWD3/FANCM/ZRANB3/ZNF365/PRIMPOL/MRE11/BRCA2/BRCA1/RBBP8/EME1	19
GO:1905897	regulation of response to endoplasmic reticulum stress	25/2876	84/18888	0.297619	1.9546	3.71611	0.000530884	0.017548	0.0159144	BCL2L1/GRINA/USP14/CREB3/CLU/XBP1/TMEM33/SELENOS/SGTA/MANF/DDRGK1/DNAJB9/HSPA5/MBTPS2/ERP29/EIF2AK3/TMX1/CREB3L1/WFS1/LPCAT3/NR1H3/SVIP/ERN1/TMBIM6/FICD	25
GO:0009166	nucleotide catabolic process	42/2876	167/18888	0.251497	1.6517	3.58502	0.000548172	0.0180215	0.0163438	ENO2/HK2/PRKACA/PKM/COL6A1/PGAM1/GPI/HK1/ENO1/HINT1/DDIT4/PFKP/ALDOC/NEIL2/EIF6/NUDT16/FOXK2/DCTPP1/NT5C/ENTPD7/LIPA/UNG/MBD4/NUDT7/GCK/PRKAA2/ADPGK/NT5M/MLYCD/ACAT1/UPP1/UCP2/TIGAR/NUDT19/PGM1/DERA/PDE8A/PRXL2C/NUDT8/ENO3/SUCLG2/PPARA	42
GO:0006220	pyrimidine nucleotide metabolic process	18/2876	53/18888	0.339623	2.23046	3.80167	0.000556203	0.0181796	0.0164872	CTPS2/NME2/NME1/NEIL2/DCTD/PRPS1/DCTPP1/NT5C/ENTPD7/TYMS/DTYMK/UNG/MBD4/NME6/NT5M/UPP1/DHODH/SHMT1	18
GO:0033617	mitochondrial cytochrome c oxidase assembly	11/2876	25/18888	0.44	2.88968	4.00688	0.000558959	0.0181796	0.0164872	COX16/SURF1/COA3/COX18/COX14/COX17/SMIM20/COA5/COA1/SCO2/TMEM223	11
GO:0006094	gluconeogenesis	26/2876	89/18888	0.292135	1.91858	3.68128	0.000569212	0.0184146	0.0167003	ENO2/PRKACA/PGAM1/GPI/ENO1/G6PC3/MDH2/DDB1/ALDOC/SELENOS/MDH1/SLC25A1/MST1/GOT1/SLC37A4/CRY1/SLC25A13/GCK/TCF7L2/PCK2/FOXO1/PGM1/NR3C1/SDHAF3/ENO3/PPARA	26
GO:0051306	mitotic sister chromatid separation	20/2876	62/18888	0.322581	2.11853	3.73869	0.00060076	0.0193324	0.0175326	ANAPC11/LCMT1/BUB3/DUSP1/MAD2L1/CCNB1/NCAPH2/CDC20/MAD2L1BP/KNTC1/BIRC5/UBE2C/GEN1/AURKB/PLK1/TRIP13/TTK/ESPL1/NUF2/NDC80	20
GO:0006090	pyruvate metabolic process	32/2876	118/18888	0.271186	1.781	3.60675	0.000609256	0.0195026	0.017687	ENO2/HK2/PRKACA/PKM/COL6A1/SLC16A3/PDK3/PGAM1/GPI/HK1/ENO1/VDAC1/DDIT4/PFKP/ALDOC/EIF6/FOXK2/SLC16A1/SRR/DLAT/LIPA/GCK/PRKAA2/ADPGK/PCK2/ME3/UCP2/TIGAR/PGM1/PRXL2C/ENO3/PPARA	32
GO:0170033	L-amino acid metabolic process	41/2876	163/18888	0.251534	1.65194	3.54276	0.000631601	0.020112	0.0182397	CTPS2/P4HA1/EGLN1/SMS/GPT2/P4HB/GOT2/PSAT1/ALDH18A1/GFPT1/SEPHS2/CRTAP/SEPHS1/APIP/ATP2B4/PLOD2/GOT1/PYCR2/THNSL2/SHMT2/P4HA2/SRR/ASNSD1/MTHFR/GFPT2/PPAT/SLC25A13/GCLC/MRI1/AASS/GSTZ1/OAT/NIT2/MTRR/ASS1/UCP2/PYCR3/RIDA/CTH/MTAP/SHMT1	41
GO:0021915	neural tube development	40/2876	158/18888	0.253165	1.66265	3.54483	0.000636746	0.0201703	0.0182925	PRKACA/SPINT2/RGMA/DEAF1/TMED2/CDK20/LHX2/APAF1/NUP133/TCTN1/BMP7/BBS4/ZFP36L1/HES5/IFT57/PTCH1/TSC1/BCL10/FZD2/MTHFR/ATP6AP2/LIAS/KDM2B/CELSR1/MKS1/PTK7/SMO/SHH/TEAD2/FUZ/SUFU/LRP2/NOTCH1/FZD6/PAX6/CC2D2A/SFRP2/CHRD/TRIM71/HES1	40
GO:0006270	DNA replication initiation	14/2876	37/18888	0.378378	2.48498	3.83185	0.000661651	0.0207431	0.018812	ORC4/TOPBP1/ORC3/MCM6/MCM2/CDT1/POLA1/POLA2/CDK2/PURA/ORC1/MCM5/CCNE2/CDC6	14
GO:0009225	nucleotide-sugar metabolic process	14/2876	37/18888	0.378378	2.48498	3.83185	0.000661651	0.0207431	0.018812	GFPT1/UAP1/NANS/MPI/DPM1/GNPDA1/MGAT1/GFPT2/SLC35A3/DPAGT1/TGDS/GNE/GNPNAT1/UGP2	14
GO:0006903	vesicle targeting	21/2876	67/18888	0.313433	2.05846	3.67826	0.000681352	0.0212512	0.0192728	TRAPPC4/YKT6/ARFGAP3/TRAPPC3/TRAPPC11/TMED10/TRAPPC6A/TMED2/PPP6C/TMED9/EXOC2/GBF1/TRAPPC9/TRAPPC1/TRAPPC13/KLHL12/TRAPPC2L/NLGN1/WIPI1/MAP4K2/MAPK15	21
GO:2001243	negative regulation of intrinsic apoptotic signaling pathway	31/2876	114/18888	0.27193	1.78589	3.56687	0.000699188	0.0216962	0.0196764	MIF/BCL2L1/PTTG1IP/GRINA/CDKN2D/TRAP1/ENO1/CREB3/MAPK8IP1/CLU/XBP1/SELENOS/BAG5/PARL/VDAC2/PINK1/NDUFA13/ACKR3/DDX3X/SOD2/MAPK7/PPIF/YBX3/TRIAP1/FBXO7/CREB3L1/RRM2B/WFS1/NOL3/SFRP2/TMBIM6	31
GO:0006310	DNA recombination	74/2876	339/18888	0.218289	1.4336	3.41417	0.000703295	0.0217129	0.0196915	HMGB2/MORF4L2/HSPD1/MRNIP/RNF138/MLH1/MAGEF1/ERCC1/PRKDC/ZSWIM7/RADX/TOPBP1/MSH6/RHNO1/NABP2/XRCC6/RUVBL2/DMAP1/CHEK1/ACTR2/RPA1/RNF8/RMI1/RAD50/WRN/PSMD14/MLH3/ENDOG/RIF1/ACTL6A/CENPX/SMC5/FEN1/ERCC5/UNG/DCAF1/CENPS/KIN/MCM6/RNF168/TOP3B/RECQL4/MCM2/FBH1/LEF1/TIMELESS/INIP/AP5Z1/GEN1/UHRF1/TONSL/GINS2/AP5S1/RFWD3/RPA3/CYREN/APEX2/FANCM/TRIP13/FANCB/ZRANB3/MCM5/ZNF365/MRE11/BRCA2/NHEJ1/RAD51AP1/B…	74
GO:0033047	regulation of mitotic sister chromatid segregation	18/2876	54/18888	0.333333	2.18915	3.70865	0.000716972	0.0220234	0.0199731	LCMT1/BUB3/DUSP1/BECN1/MAD2L1/CCNB1/CDC20/MAD2L1BP/CDK1/KNTC1/BIRC5/GEN1/AURKB/PLK1/TRIP13/TTK/NUF2/NDC80	18
GO:0019348	dolichol metabolic process	10/2876	22/18888	0.454545	2.98521	3.94848	0.000729956	0.0221199	0.0200606	ALG13/ALG3/DPM1/DHDDS/ALG2/RFT1/ALG8/DPAGT1/DPM3/ALG1	10
GO:0006002	fructose 6-phosphate metabolic process	7/2876	12/18888	0.583333	3.83102	4.15749	0.000734663	0.0221199	0.0200606	HK2/HK1/PFKP/GFPT1/MPI/TALDO1/GFPT2	7
GO:0040034	regulation of development, heterochronic	7/2876	12/18888	0.583333	3.83102	4.15749	0.000734663	0.0221199	0.0200606	RBPJ/DLL1/ASCL1/NOTCH1/NR2E1/PAX6/HES1	7
GO:0048505	regulation of timing of cell differentiation	7/2876	12/18888	0.583333	3.83102	4.15749	0.000734663	0.0221199	0.0200606	RBPJ/DLL1/ASCL1/NOTCH1/NR2E1/PAX6/HES1	7
GO:1901605	alpha-amino acid metabolic process	51/2876	216/18888	0.236111	1.55065	3.44953	0.000744907	0.0223179	0.0202402	CTPS2/P4HA1/EGLN1/SMS/GPT2/P4HB/GOT2/BCAT1/PSAT1/ALDH18A1/GFPT1/SEPHS2/CRTAP/SEPHS1/MMUT/APIP/ATP2B4/PCBD1/PLOD2/GOT1/PYCR2/TH/THNSL2/SHMT2/P4HA2/SRR/ASNSD1/MTHFR/GFPT2/PPAT/SLC25A13/GCLC/MRI1/THAP4/AASS/GSTZ1/OAT/ACAT1/ACADSB/NIT2/MTRR/ALDH6A1/ASS1/UCP2/GCDH/PYCR3/RIDA/CTH/MTAP/SHMT1/SARDH	51
GO:0051784	negative regulation of nuclear division	20/2876	63/18888	0.31746	2.08491	3.65551	0.000755842	0.0225345	0.0204366	LCMT1/TOM1L2/BUB3/CHEK1/BMP7/DUSP1/MAD2L1/CCNB1/CDC20/NME6/MAD2L1BP/KNTC1/BIRC5/GEN1/AURKB/PLK1/TRIP13/TTK/NUF2/NDC80	20
GO:0045930	negative regulation of mitotic cell cycle	57/2876	248/18888	0.229839	1.50946	3.42265	0.000766721	0.0227473	0.0206296	CDK5RAP3/LCMT1/MRNIP/BTG1/PRKDC/CCNG1/TOM1L2/TOPBP1/NABP2/NOP53/RINT1/BUB3/CHEK1/BMP7/ZFP36L1/MBTPS2/DUSP1/DONSON/TPRA1/RAD50/MAD2L1/CCNB1/CDC20/NME6/CDKN1C/ACVR1/MAD2L1BP/TRIAP1/CDK1/KNTC1/BTG2/FBXO7/BIRC5/CDK2AP2/INIP/CDK2/ZFP36L2/GEN1/BTN2A2/AURKB/ABRAXAS1/ORC1/RFWD3/PLK1/DTL/TRIP13/TTK/MRE11/NUF2/CLSPN/BRCA1/MAP3K20/NDC80/E2F7/CDC6/RBBP8/EME1	57
GO:0006631	fatty acid metabolic process	85/2876	401/18888	0.21197	1.3921	3.36351	0.000780938	0.0230566	0.0209102	MIF/SCD/PDK3/GSTP1/NDUFAB1/FADS1/MGST3/ACSL4/XBP1/PRKAB1/GPX4/PTGES2/ELOVL5/HADHA/EIF6/SCAP/ADIPOR1/MFSD2A/GNPAT/EPHX1/MMUT/WDTC1/PLAA/PLP1/HACD2/TH/THNSL2/ALDH3A2/MID1IP1/ABHD12/CYGB/IRS2/AASDH/LIPA/MCEE/DECR1/LIAS/AACS/SLC27A3/NUDT7/ASAH1/FABP3/ABHD5/SLC27A5/HADH/PRKAA2/CPT2/TYSND1/PRXL2B/MLYCD/TNFRSF1A/CRAT/SOX9/ACOT8/PTGR1/PCK2/ERLIN2/PPARD/ACAT1/ACADSB/HADHB/ETFDH/GPAM/PTGES/ELOVL1/FADS3/NAA…	85
GO:0007094	mitotic spindle assembly checkpoint signaling	16/2876	46/18888	0.347826	2.28433	3.69612	0.000826765	0.0240592	0.0218194	LCMT1/BUB3/DUSP1/MAD2L1/CCNB1/CDC20/MAD2L1BP/KNTC1/BIRC5/GEN1/AURKB/PLK1/TRIP13/TTK/NUF2/NDC80	16
GO:0071173	spindle assembly checkpoint signaling	16/2876	46/18888	0.347826	2.28433	3.69612	0.000826765	0.0240592	0.0218194	LCMT1/BUB3/DUSP1/MAD2L1/CCNB1/CDC20/MAD2L1BP/KNTC1/BIRC5/GEN1/AURKB/PLK1/TRIP13/TTK/NUF2/NDC80	16
GO:0071174	mitotic spindle checkpoint signaling	16/2876	46/18888	0.347826	2.28433	3.69612	0.000826765	0.0240592	0.0218194	LCMT1/BUB3/DUSP1/MAD2L1/CCNB1/CDC20/MAD2L1BP/KNTC1/BIRC5/GEN1/AURKB/PLK1/TRIP13/TTK/NUF2/NDC80	16
GO:0010965	regulation of mitotic sister chromatid separation	19/2876	59/18888	0.322034	2.11494	3.63512	0.00083449	0.0241684	0.0219184	ANAPC11/LCMT1/BUB3/DUSP1/MAD2L1/CCNB1/CDC20/MAD2L1BP/KNTC1/BIRC5/UBE2C/GEN1/AURKB/PLK1/TRIP13/TTK/ESPL1/NUF2/NDC80	19
GO:0000077	DNA damage checkpoint signaling	33/2876	125/18888	0.264	1.73381	3.48851	0.000843168	0.024304	0.0220414	CDK5RAP3/MRNIP/PRKDC/CCNG1/TOPBP1/RHNO1/NOP53/RINT1/CHEK1/CEP63/MBTPS2/DONSON/CLOCK/EIF2AK4/CRY1/TRIAP1/CDK1/CDK2/E2F1/ABRAXAS1/RFWD3/PLK1/RNASEH2B/DTL/ATRIP/MRE11/BRCA2/CLSPN/BRCA1/MAP3K20/E2F7/EME1/FBXO4	33
GO:0046364	monosaccharide biosynthetic process	27/2876	96/18888	0.28125	1.8471	3.52643	0.000861674	0.0246477	0.0223531	ENO2/PRKACA/PGAM1/GPI/ENO1/G6PC3/MDH2/DDB1/ALDOC/SELENOS/MDH1/SLC25A1/AKR1A1/MST1/GOT1/SLC37A4/CRY1/SLC25A13/GCK/TCF7L2/PCK2/FOXO1/PGM1/NR3C1/SDHAF3/ENO3/PPARA	27
GO:0006040	amino sugar metabolic process	15/2876	42/18888	0.357143	2.34552	3.69963	0.000871302	0.0246477	0.0223531	GFPT1/NAGK/UAP1/GNPDA1/MGAT1/GFPT2/CHST3/SLC35A3/DPAGT1/GNE/GNPNAT1/FN3K/CHST7/NANP/CTBS	15
GO:0009262	deoxyribonucleotide metabolic process	15/2876	42/18888	0.357143	2.34552	3.69963	0.000871302	0.0246477	0.0223531	DGUOK/NEIL2/NUDT16/GUK1/DCTPP1/NT5C/TYMS/DTYMK/UNG/MBD4/NT5M/UPP1/RRM2B/DERA/SHMT1	15
GO:0019692	deoxyribose phosphate metabolic process	15/2876	42/18888	0.357143	2.34552	3.69963	0.000871302	0.0246477	0.0223531	DGUOK/NEIL2/NUDT16/GUK1/DCTPP1/NT5C/TYMS/DTYMK/UNG/MBD4/NT5M/UPP1/RRM2B/DERA/SHMT1	15
GO:0006754	ATP biosynthetic process	28/2876	101/18888	0.277228	1.82068	3.50477	0.000893884	0.0251694	0.0228263	NDUFAB1/ENO1/NDUFV2/NDUFB9/NDUFB7/NDUFC2/NDUFB2/NDUFA5/ATP5F1E/NDUFS8/NDUFB6/NDUFC1/ATP6V0C/NDUFA7/ATP5MC3/NDUFV3/PINK1/NDUFA6/STOML2/NDUFA12/ATP5PO/NDUFA13/ATP5ME/LIPA/SLC25A13/NDUFB3/UQCC3/PPARA	28
GO:0050657	nucleic acid transport	40/2876	161/18888	0.248447	1.63167	3.4113	0.000945231	0.0263711	0.023916	G3BP2/ALKBH5/NUP58/TOMM20/PEG10/CHTOP/NUTF2/EIF4A3/AAAS/NUP54/SLBP/NUP133/RTRAF/EIF4E/NUP43/ENY2/SEC13/ZFP36L1/GLE1/FLOT1/NUP210/NCBP1/FYTTD1/DDX39A/ALYREF/MAGOH/NUP98/SARNP/ZC3H3/PARP11/NXT1/CETN2/NUP50/NUP37/SMG7/NDC1/NXT2/TST/MAGOHB/ZFP36	40
GO:0050658	RNA transport	40/2876	161/18888	0.248447	1.63167	3.4113	0.000945231	0.0263711	0.023916	G3BP2/ALKBH5/NUP58/TOMM20/PEG10/CHTOP/NUTF2/EIF4A3/AAAS/NUP54/SLBP/NUP133/RTRAF/EIF4E/NUP43/ENY2/SEC13/ZFP36L1/GLE1/FLOT1/NUP210/NCBP1/FYTTD1/DDX39A/ALYREF/MAGOH/NUP98/SARNP/ZC3H3/PARP11/NXT1/CETN2/NUP50/NUP37/SMG7/NDC1/NXT2/TST/MAGOHB/ZFP36	40
GO:0019319	hexose biosynthetic process	26/2876	92/18888	0.282609	1.85602	3.48817	0.000984412	0.0273388	0.0247937	ENO2/PRKACA/PGAM1/GPI/ENO1/G6PC3/MDH2/DDB1/ALDOC/SELENOS/MDH1/SLC25A1/MST1/GOT1/SLC37A4/CRY1/SLC25A13/GCK/TCF7L2/PCK2/FOXO1/PGM1/NR3C1/SDHAF3/ENO3/PPARA	26
GO:0045786	negative regulation of cell cycle	85/2876	405/18888	0.209877	1.37835	3.26207	0.00106821	0.0295312	0.0267819	CDKN2D/CDK5RAP3/LCMT1/MRNIP/CHMP2A/BTG1/PPP2R5B/PRKDC/CCNG1/TOM1L2/TAF6/TOPBP1/RHNO1/NABP2/NOP53/RINT1/BUB3/CHEK1/BMP7/TSPYL2/ZFP36L1/CEP63/MBTPS2/DUSP1/DONSON/TPRA1/RAD50/MAD2L1/CLOCK/CCNB1/TMEM67/EIF2AK4/LATS1/CRY1/CDK5/CDC20/NME6/CDKN1C/ACVR1/MAD2L1BP/TRIAP1/CDK1/CDT1/KNTC1/CDK5RAP1/BTG2/PTPRK/FBXO7/BIRC5/TIMELESS/TP53I13/CDK2AP2/INIP/CDK2/E2F1/ZFP36L2/GEN1/BTN2A2/AURKB/ABRAXAS1/ORC1/RFWD3/PLK…	85
GO:0031577	spindle checkpoint signaling	16/2876	47/18888	0.340426	2.23573	3.59479	0.00107844	0.0295335	0.026784	LCMT1/BUB3/DUSP1/MAD2L1/CCNB1/CDC20/MAD2L1BP/KNTC1/BIRC5/GEN1/AURKB/PLK1/TRIP13/TTK/NUF2/NDC80	16
GO:0006913	nucleocytoplasmic transport	72/2876	333/18888	0.216216	1.41999	3.27706	0.00108286	0.0295335	0.026784	PRKACA/PTTG1IP/ALKBH5/UBE2I/NUP58/CALR/CHTOP/UFM1/NUTF2/EIF4A3/TNPO1/EIF6/AAAS/NUP54/AHCYL1/NUP133/MALT1/HSPA9/EIF4E/DMAP1/NMD3/NUP43/ENY2/CTDSPL2/SEC13/HDAC3/GLE1/NUP210/NCBP1/FYTTD1/DDX39A/APPL1/TSC1/ALYREF/ANKRD54/DESI1/MAGOH/NUP98/SARNP/LSG1/CDK5/RIOK2/NXT1/SMO/NFKBIA/SHH/CDK1/NUP50/NUP37/SMG7/NDC1/ANP32B/SUFU/ZPR1/CAMK1/E2F3/POLA2/NOTCH1/DNAJC27/SMAD3/NXT2/BAG3/PRKD1/CHCHD4/CCHCR1/SPRN/CABP1…	72
GO:0051169	nuclear transport	72/2876	333/18888	0.216216	1.41999	3.27706	0.00108286	0.0295335	0.026784	PRKACA/PTTG1IP/ALKBH5/UBE2I/NUP58/CALR/CHTOP/UFM1/NUTF2/EIF4A3/TNPO1/EIF6/AAAS/NUP54/AHCYL1/NUP133/MALT1/HSPA9/EIF4E/DMAP1/NMD3/NUP43/ENY2/CTDSPL2/SEC13/HDAC3/GLE1/NUP210/NCBP1/FYTTD1/DDX39A/APPL1/TSC1/ALYREF/ANKRD54/DESI1/MAGOH/NUP98/SARNP/LSG1/CDK5/RIOK2/NXT1/SMO/NFKBIA/SHH/CDK1/NUP50/NUP37/SMG7/NDC1/ANP32B/SUFU/ZPR1/CAMK1/E2F3/POLA2/NOTCH1/DNAJC27/SMAD3/NXT2/BAG3/PRKD1/CHCHD4/CCHCR1/SPRN/CABP1…	72
GO:0042770	signal transduction in response to DNA damage	45/2876	188/18888	0.239362	1.572	3.34045	0.00109506	0.0297328	0.0269648	PSMD10/MIF/PTTG1IP/CDK5RAP3/MRNIP/GRB2/PRKDC/CCNG1/TOPBP1/RHNO1/NOP53/ZNHIT1/USP10/RINT1/CHEK1/CEP63/RNF8/MBTPS2/DONSON/CLOCK/EIF2AK4/CRY1/GADD45A/TRIAP1/CDK1/EEF1E1/NDRG1/CDK2/E2F1/ABRAXAS1/RFWD3/PLK1/RNASEH2B/DTL/ATRIP/DYRK3/MRE11/BRCA2/CLSPN/BRCA1/MAP3K20/E2F7/EME1/TFAP4/FBXO4	45
GO:0009219	pyrimidine deoxyribonucleotide metabolic process	10/2876	23/18888	0.434783	2.85542	3.77337	0.00111635	0.0301761	0.0273669	NEIL2/DCTPP1/NT5C/TYMS/DTYMK/UNG/MBD4/NT5M/UPP1/SHMT1	10
GO:0044774	mitotic DNA integrity checkpoint signaling	25/2876	88/18888	0.284091	1.86575	3.44993	0.00112397	0.0302478	0.0274319	CDK5RAP3/MRNIP/PRKDC/CCNG1/TOPBP1/NOP53/RINT1/CHEK1/MBTPS2/DONSON/TRIAP1/CDK1/CDK2/ABRAXAS1/ORC1/RFWD3/PLK1/DTL/MRE11/CLSPN/BRCA1/MAP3K20/E2F7/CDC6/EME1	25
GO:0009132	nucleoside diphosphate metabolic process	33/2876	127/18888	0.259843	1.7065	3.38565	0.00113187	0.0303261	0.0275028	ENO2/HK2/PRKACA/CASK/PKM/COL6A1/PGAM1/GPI/HK1/ENO1/DDIT4/PFKP/ALDOC/EIF6/FOXK2/GUK1/ENTPD7/LIPA/DTYMK/AK4/NUDT7/MAGI3/GCK/PRKAA2/ADPGK/RRM2B/UCP2/TIGAR/DHODH/PGM1/PRXL2C/ENO3/PPARA	33
GO:0007007	inner mitochondrial membrane organization	15/2876	43/18888	0.348837	2.29097	3.59175	0.0011519	0.0304312	0.0275982	ROMO1/CHCHD6/TOMM70/CHCHD3/OXA1L/COX18/SLC25A46/HSPA9/PINK1/SAMM50/TIMM10B/NDUFA13/UQCC3/MTX1/TRMT10B	15
GO:0006517	protein deglycosylation	8/2876	16/18888	0.5	3.28373	3.87301	0.00116581	0.0304312	0.0275982	MAN2A1/MAN2A2/NGLY1/ENGASE/EDEM2/MAN2B1/MAN1C1/AGA	8
GO:0034497	protein localization to phagophore assembly site	8/2876	16/18888	0.5	3.28373	3.87301	0.00116581	0.0304312	0.0275982	WDR45B/PACS2/WIPI2/ARFIP2/ATG9A/WIPI1/STX17/WDR45	8
GO:0046459	short-chain fatty acid metabolic process	8/2876	16/18888	0.5	3.28373	3.87301	0.00116581	0.0304312	0.0275982	MMUT/THNSL2/MCEE/CRAT/PCK2/ACSS1/ACSS2/ACADS	8
GO:0070131	positive regulation of mitochondrial translation	8/2876	16/18888	0.5	3.28373	3.87301	0.00116581	0.0304312	0.0275982	NGRN/COA3/RMND1/RCC1L/CDK5RAP1/METTL8/MPV17L2/RPUSD3	8
GO:0090110	COPII-coated vesicle cargo loading	8/2876	16/18888	0.5	3.28373	3.87301	0.00116581	0.0304312	0.0275982	SEC31A/SEC24A/SEC23A/SEC24C/SEC23B/SCAP/SEC24D/SEC13	8
GO:0046394	carboxylic acid biosynthetic process	72/2876	334/18888	0.215569	1.41574	3.24884	0.00117891	0.0306416	0.0277889	MIF/SCD/GSTP1/NDUFAB1/FADS1/MGST3/GOT2/BCAT1/PSAT1/XBP1/PRKAB1/GPX4/OSBPL2/ALDH18A1/SEPHS2/PTGES2/ELOVL5/EIF6/SCAP/SEPHS1/AKR1A1/OSBP/LTA4H/APIP/ATP2B4/PCBD1/UROS/WDTC1/PLOD2/PLP1/GOT1/HACD2/PYCR2/THNSL2/SHMT2/SRR/ASNSD1/MID1IP1/MTHFR/LIAS/MRI1/GATM/SLC27A5/PRKAA2/GNE/PRXL2B/MLYCD/ACOT8/AASS/ERLIN2/OAT/PTGES/ELOVL1/MTRR/FADS3/ACSS1/CYP46A1/ASS1/CHST14/NANP/ACSS2/PYCR3/UST/NR1H3/ABHD3/CTH/HACD1/MT…	72
GO:0044282	small molecule catabolic process	79/2876	373/18888	0.211796	1.39096	3.23207	0.00119977	0.0310166	0.0281291	ENO2/HK2/PKM/SLC16A3/PGAM1/HK1/DCXR/ENO1/GPT2/GOT2/ESD/PFKP/BCKDHA/NAGK/HADHA/GALE/MFSD2A/FOXK2/AKR1A1/ATP2B4/QPRT/SLC16A1/GOT1/THNSL2/GNPDA1/ADA2/NQO2/PNKD/MGAT1/ENTPD7/IRS2/MCEE/GLB1/DECR1/NUDT7/HAGH/GPD2/GCK/CARNMT1/HADH/CPT2/TYSND1/MLYCD/CRAT/LRP5/ACOT8/AASS/ALDH1B1/PCK2/GSTZ1/PPARD/OAT/ACAT1/UPP1/ACADSB/HADHB/ETFDH/MTRR/ALDH6A1/LPIN2/CYP46A1/TST/ALDH1L2/TIGAR/GCDH/NUDT19/IDNK/RIDA/DERA/ABHD3…	79
GO:0018208	peptidyl-proline modification	14/2876	39/18888	0.358974	2.35755	3.59664	0.0012125	0.0310166	0.0281291	P4HA1/EGLN1/P4HB/PPIG/PPIL1/CRTAP/PPIE/PPIB/P4HA2/OGFOD1/PPID/PPIF/FKBP10/PPIL3	14
GO:0048207	vesicle targeting, rough ER to cis-Golgi	11/2876	27/18888	0.407407	2.67563	3.69259	0.00121884	0.0310166	0.0281291	TRAPPC4/TRAPPC3/TRAPPC11/TMED10/TRAPPC6A/TMED2/PPP6C/TRAPPC1/KLHL12/TRAPPC2L/MAPK15	11
GO:0048208	COPII vesicle coating	11/2876	27/18888	0.407407	2.67563	3.69259	0.00121884	0.0310166	0.0281291	TRAPPC4/TRAPPC3/TRAPPC11/TMED10/TRAPPC6A/TMED2/PPP6C/TRAPPC1/KLHL12/TRAPPC2L/MAPK15	11
GO:0051984	positive regulation of chromosome segregation	11/2876	27/18888	0.407407	2.67563	3.69259	0.00121884	0.0310166	0.0281291	BECN1/SMC5/CCNB1/NCAPH2/SMC2/NCAPD2/MAD2L1BP/CDK1/BIRC5/AURKB/CDC6	11
GO:0006890	retrograde vesicle-mediated transport, Golgi to endoplasmic reticulum	17/2876	52/18888	0.326923	2.14705	3.5103	0.00127562	0.0323263	0.0293169	ARF4/RAB6A/RER1/KDELR2/ARCN1/COG3/COPA/COPB2/BET1L/TMED10/LMAN2/UVRAG/GBF1/RINT1/GOLPH3L/TAPBP/RAB33B	17
GO:0051236	establishment of RNA localization	40/2876	164/18888	0.243902	1.60182	3.28051	0.00137825	0.0341372	0.0309592	G3BP2/ALKBH5/NUP58/TOMM20/PEG10/CHTOP/NUTF2/EIF4A3/AAAS/NUP54/SLBP/NUP133/RTRAF/EIF4E/NUP43/ENY2/SEC13/ZFP36L1/GLE1/FLOT1/NUP210/NCBP1/FYTTD1/DDX39A/ALYREF/MAGOH/NUP98/SARNP/ZC3H3/PARP11/NXT1/CETN2/NUP50/NUP37/SMG7/NDC1/NXT2/TST/MAGOHB/ZFP36	40
GO:0043248	proteasome assembly	7/2876	13/18888	0.538462	3.53632	3.87691	0.00138279	0.0341372	0.0309592	PSMD10/ADRM1/PSMD9/PSMG3/PSMG1/OTUD6B/PSMD5	7
GO:0070417	cellular response to cold	7/2876	13/18888	0.538462	3.53632	3.87691	0.00138279	0.0341372	0.0309592	PRKACA/DNAJC3/EIF2AK3/EIF2AK4/NFKBIA/FOXO1/SLC9A1	7
GO:0033046	negative regulation of sister chromatid segregation	16/2876	48/18888	0.333333	2.18915	3.49599	0.00139198	0.0341372	0.0309592	LCMT1/BUB3/DUSP1/MAD2L1/CCNB1/CDC20/MAD2L1BP/KNTC1/BIRC5/GEN1/AURKB/PLK1/TRIP13/TTK/NUF2/NDC80	16
GO:0033048	negative regulation of mitotic sister chromatid segregation	16/2876	48/18888	0.333333	2.18915	3.49599	0.00139198	0.0341372	0.0309592	LCMT1/BUB3/DUSP1/MAD2L1/CCNB1/CDC20/MAD2L1BP/KNTC1/BIRC5/GEN1/AURKB/PLK1/TRIP13/TTK/NUF2/NDC80	16
GO:0045841	negative regulation of mitotic metaphase/anaphase transition	16/2876	48/18888	0.333333	2.18915	3.49599	0.00139198	0.0341372	0.0309592	LCMT1/BUB3/DUSP1/MAD2L1/CCNB1/CDC20/MAD2L1BP/KNTC1/BIRC5/GEN1/AURKB/PLK1/TRIP13/TTK/NUF2/NDC80	16
GO:0046365	monosaccharide catabolic process	16/2876	48/18888	0.333333	2.18915	3.49599	0.00139198	0.0341372	0.0309592	ENO2/HK2/PKM/PGAM1/HK1/ENO1/PFKP/GALE/FOXK2/GLB1/GCK/LRP5/TIGAR/FUT5/ENO3/RBKS	16
GO:2000816	negative regulation of mitotic sister chromatid separation	16/2876	48/18888	0.333333	2.18915	3.49599	0.00139198	0.0341372	0.0309592	LCMT1/BUB3/DUSP1/MAD2L1/CCNB1/CDC20/MAD2L1BP/KNTC1/BIRC5/GEN1/AURKB/PLK1/TRIP13/TTK/NUF2/NDC80	16
GO:0071806	protein transmembrane transport	20/2876	66/18888	0.30303	1.99014	3.41498	0.00144384	0.0351654	0.0318917	USP9X/ROMO1/TOMM20/HSPD1/PAM16/SEC61B/TOMM70/TOMM40/TMED10/SEC61A2/TRAM1/HSPA5/SEC63/TOMM22/GRPEL1/EDNRB/PEX26/CHCHD4/BLOC1S3/PEX5L	20
GO:0006488	dolichol-linked oligosaccharide biosynthetic process	9/2876	20/18888	0.45	2.95535	3.70792	0.00147312	0.0351654	0.0318917	ALG13/ALG3/DPM1/DHDDS/ALG2/RFT1/ALG8/DPAGT1/ALG1	9
GO:0036498	IRE1-mediated unfolded protein response	9/2876	20/18888	0.45	2.95535	3.70792	0.00147312	0.0351654	0.0318917	DNAJC10/XBP1/TMEM33/DDRGK1/DNAJB9/HSPA5/VAPB/ERN1/FICD	9
GO:0042157	lipoprotein metabolic process	35/2876	139/18888	0.251799	1.65368	3.27819	0.0014837	0.0351654	0.0318917	GOLGA7/UGCG/ATG4A/SAMD1/ZDHHC17/WDR45B/WIPI2/PIGF/PIGQ/ABHD10/DPM1/ZDHHC16/CTSD/ZDHHC20/ZDHHC4/SLC30A5/PIGH/LIPA/ATG101/PIGM/PIGS/PIGZ/PIGK/APOE/DPM3/WIPI1/PIGP/ZDHHC14/PIGA/SVIP/WDR45/APOM/APOL2/MTTP/PPARA	35
GO:0018243	protein O-linked glycosylation via threonine	6/2876	10/18888	0.6	3.94047	3.94178	0.00149503	0.0351654	0.0318917	GALNT2/GALNT1/GALNT16/GALNT11/GALNT13/EOGT	6
GO:0031055	chromatin remodeling at centromere	6/2876	10/18888	0.6	3.94047	3.94178	0.00149503	0.0351654	0.0318917	ITGB3BP/CENPP/CENPA/OIP5/CENPI/HJURP	6
GO:0034080	CENP-A containing chromatin assembly	6/2876	10/18888	0.6	3.94047	3.94178	0.00149503	0.0351654	0.0318917	ITGB3BP/CENPP/CENPA/OIP5/CENPI/HJURP	6
GO:0048194	Golgi vesicle budding	6/2876	10/18888	0.6	3.94047	3.94178	0.00149503	0.0351654	0.0318917	ARFGAP3/TMED10/TMED2/TMED9/GBF1/GOLPH3L	6
GO:0000045	autophagosome assembly	30/2876	114/18888	0.263158	1.72828	3.3054	0.00149546	0.0351654	0.0318917	MAP1LC3B/RNF5/ATG4A/RAB5A/MOAP1/TMEM41B/GABARAPL2/WDR45B/PACS2/WIPI2/ARFIP2/TMEM39A/SNX30/PINK1/C9orf72/ATG9A/CTSD/BECN1/EMC6/ATG101/RAB33B/WIPI1/TOM1/ULK3/STX17/BAG3/ATG16L2/STBD1/SNX18/WDR45	30
GO:0042752	regulation of circadian rhythm	30/2876	114/18888	0.263158	1.72828	3.3054	0.00149546	0.0351654	0.0318917	USP9X/PER1/DDB1/MAGED1/ZFHX3/THRAP3/PRKDC/NR2F6/HDAC3/BHLHE40/NOCT/CLOCK/SIAH2/CRY1/RORA/PRKAA2/DRD2/NLGN1/CDK1/PRKG1/TIMELESS/PDE6B/NR1D2/NR1H3/ADORA2A/KCNA2/PRKCG/OPRL1/SPSB4/PPARA	30
GO:0045664	regulation of neuron differentiation	46/2876	196/18888	0.234694	1.54134	3.22868	0.00149751	0.0351654	0.0318917	CPNE1/CDK5RAP3/SHOC2/DIXDC1/CALR/MMD/ZFHX3/ZEB1/SOX3/GPRC5B/EIF4E/BMP7/HES5/EDNRB/SOX8/GDPD5/EIF2AK4/NKX6-1/RAP1GAP/NBL1/DLL1/NLGN1/SHH/SOX9/ASCL1/MYCL/CDK5RAP1/FEZF1/NOTCH3/NOTCH1/ASPM/ADRA2C/TRPC5/PTBP1/RET/EYA1/NR2E1/TUNAR/HEY1/PAX6/ALK/TGIF2/CASZ1/SFRP2/MMD2/HES1	46
GO:0019320	hexose catabolic process	15/2876	44/18888	0.340909	2.23891	3.48683	0.00150479	0.0352004	0.0319234	ENO2/HK2/PKM/PGAM1/HK1/ENO1/PFKP/GALE/FOXK2/GLB1/GCK/LRP5/TIGAR/FUT5/ENO3	15
GO:0016053	organic acid biosynthetic process	72/2876	337/18888	0.21365	1.40314	3.16472	0.00151402	0.0352808	0.0319963	MIF/SCD/GSTP1/NDUFAB1/FADS1/MGST3/GOT2/BCAT1/PSAT1/XBP1/PRKAB1/GPX4/OSBPL2/ALDH18A1/SEPHS2/PTGES2/ELOVL5/EIF6/SCAP/SEPHS1/AKR1A1/OSBP/LTA4H/APIP/ATP2B4/PCBD1/UROS/WDTC1/PLOD2/PLP1/GOT1/HACD2/PYCR2/THNSL2/SHMT2/SRR/ASNSD1/MID1IP1/MTHFR/LIAS/MRI1/GATM/SLC27A5/PRKAA2/GNE/PRXL2B/MLYCD/ACOT8/AASS/ERLIN2/OAT/PTGES/ELOVL1/MTRR/FADS3/ACSS1/CYP46A1/ASS1/CHST14/NANP/ACSS2/PYCR3/UST/NR1H3/ABHD3/CTH/HACD1/MT…	72
GO:0006605	protein targeting	70/2876	327/18888	0.214067	1.40588	3.13777	0.00165447	0.0380759	0.0345312	BNIP3L/SCARB2/GOLGA7/ROMO1/TOMM5/TOMM20/HSPD1/CDC37/PRNP/PAM16/SEC61B/FZD5/UBE2D3/TOMM6/TOMM70/GDAP1/CIB1/OS9/CLU/AP3D1/TOMM40/IMMP1L/SPCS1/SEC61A2/SGTA/PITRM1/TRAM1/SSR1/GNPTAB/NUP54/PARL/HSPA5/SEC63/LMAN1/YIF1B/SGTB/RNF31/PINK1/USP36/AP4B1/SAMM50/HSPA4/SSR3/TIMM10B/TOMM22/GRPEL1/GNPTG/ZDHHC20/NDUFA13/BECN1/ZDHHC4/CACNG2/SAE1/RTP5/CDK5/NLGN1/HPCA/FBXO7/ZDHHC14/TSPO/HAP1/MYO1C/MICALL2/MTX1/CHM/CH…	70
GO:0016093	polyprenol metabolic process	10/2876	24/18888	0.416667	2.73644	3.60746	0.0016547	0.0380759	0.0345312	ALG13/ALG3/DPM1/DHDDS/ALG2/RFT1/ALG8/DPAGT1/DPM3/ALG1	10
GO:0016485	protein processing	55/2876	245/18888	0.22449	1.47433	3.16706	0.0016594	0.0380759	0.0345312	HM13/PRKACA/PCSK1/PCSK1N/ECEL1/ENO1/GLG1/PRNP/P4HB/ATG4A/METAP2/TMEM208/IMMP1L/SPCS1/PITRM1/CAPN2/YIPF5/SPON1/CPD/PARL/ADAMTS13/DHCR24/CHAC1/LGMN/STOML2/PTCH1/CTSL/PSENEN/SLC30A5/PCSK2/ATP6AP2/AEBP1/PERP/ADAMTS2/NCSTN/PCSK7/TYSND1/CAST/RHBDD1/SHH/PSEN2/XPNPEP3/FADD/RIPK2/ANXA2/LDLRAD3/BAG2/MYH9/BMP1/PRSS12/PCSK6/NOL3/GSN/DISP1/MMP14	55
GO:0009123	nucleoside monophosphate metabolic process	22/2876	76/18888	0.289474	1.90111	3.33594	0.00166527	0.0380759	0.0345312	CASK/DGUOK/IMPDH2/PAICS/GUK1/ADSL/PRPS1/GMPR2/AK9/ATIC/NT5C/APRT/TYMS/DTYMK/PPAT/AK4/MAGI3/NT5M/UPP1/DHODH/SHMT1/TK1	22
GO:0015986	proton motive force-driven ATP synthesis	22/2876	76/18888	0.289474	1.90111	3.33594	0.00166527	0.0380759	0.0345312	NDUFAB1/NDUFV2/NDUFB9/NDUFB7/NDUFC2/NDUFB2/NDUFA5/ATP5F1E/NDUFS8/NDUFB6/NDUFC1/ATP6V0C/NDUFA7/ATP5MC3/NDUFV3/NDUFA6/STOML2/NDUFA12/ATP5PO/NDUFA13/ATP5ME/NDUFB3	22
GO:1901292	nucleoside phosphate catabolic process	42/2876	176/18888	0.238636	1.56723	3.20414	0.00167223	0.0380918	0.0345456	ENO2/HK2/PRKACA/PKM/COL6A1/PGAM1/GPI/HK1/ENO1/HINT1/DDIT4/PFKP/ALDOC/NEIL2/EIF6/NUDT16/FOXK2/DCTPP1/NT5C/ENTPD7/LIPA/UNG/MBD4/NUDT7/GCK/PRKAA2/ADPGK/NT5M/MLYCD/ACAT1/UPP1/UCP2/TIGAR/NUDT19/PGM1/DERA/PDE8A/PRXL2C/NUDT8/ENO3/SUCLG2/PPARA	42
GO:0051168	nuclear export	41/2876	171/18888	0.239766	1.57465	3.19918	0.00171438	0.0388556	0.0352383	PRKACA/ALKBH5/UBE2I/CALR/CHTOP/NUTF2/EIF4A3/EIF6/AHCYL1/NUP133/MALT1/HSPA9/EIF4E/NMD3/ENY2/CTDSPL2/GLE1/NCBP1/FYTTD1/DDX39A/TSC1/ALYREF/DESI1/MAGOH/NUP98/SARNP/LSG1/CDK5/RIOK2/NXT1/SMG7/ANP32B/CAMK1/DNAJC27/NXT2/BAG3/PRKD1/CHCHD4/CCHCR1/MAGOHB/STRADB	41
GO:1903322	positive regulation of protein modification by small protein conjugation or removal	33/2876	130/18888	0.253846	1.66712	3.23473	0.00172566	0.0388556	0.0352383	PSMD10/PTTG1IP/GNL3/CDK5RAP3/RBX1/HSPA5/TOLLIP/MALT1/NOP53/DCUN1D5/DCUN1D4/PINK1/HDAC3/BCL10/DCUN1D2/TNIP1/CENPX/SAE1/DDX3X/CRY1/CENPS/CDC20/TSPYL5/RIPK2/FBXO33/UBE2C/NHLRC1/WFS1/PLK1/FANCM/RASD2/FBXO4/SPSB4	33
GO:0034508	centromere complex assembly	11/2876	28/18888	0.392857	2.58007	3.54599	0.00173393	0.0388556	0.0352383	RNF4/ITGB3BP/CENPX/KNTC1/CENPP/CENPA/OIP5/CENPI/CENPE/HJURP/CENPK	11
GO:0009185	ribonucleoside diphosphate metabolic process	31/2876	120/18888	0.258333	1.69659	3.24424	0.0017373	0.0388556	0.0352383	ENO2/HK2/PRKACA/CASK/PKM/COL6A1/PGAM1/GPI/HK1/ENO1/DDIT4/PFKP/ALDOC/EIF6/FOXK2/GUK1/ENTPD7/LIPA/AK4/MAGI3/GCK/PRKAA2/ADPGK/RRM2B/UCP2/TIGAR/DHODH/PGM1/PRXL2C/ENO3/PPARA	31
GO:0006506	GPI anchor biosynthetic process	12/2876	32/18888	0.375	2.4628	3.50984	0.0017377	0.0388556	0.0352383	PIGF/PIGQ/DPM1/SLC30A5/PIGH/PIGM/PIGS/PIGZ/PIGK/DPM3/PIGP/PIGA	12
GO:0051304	chromosome separation	23/2876	81/18888	0.283951	1.86483	3.30574	0.00175256	0.0390442	0.0354093	ANAPC11/LCMT1/BUB3/DUSP1/MAD2L1/CCNB1/NCAPH2/CDC20/SMC2/NCAPD2/MAD2L1BP/KNTC1/BIRC5/UBE2C/GEN1/AURKB/PLK1/TRIP13/TTK/ESPL1/NUF2/MAPK15/NDC80	23
GO:0042776	proton motive force-driven mitochondrial ATP synthesis	20/2876	67/18888	0.298507	1.96043	3.33762	0.0017683	0.0392511	0.035597	NDUFAB1/NDUFV2/NDUFB9/NDUFB7/NDUFC2/NDUFB2/NDUFA5/ATP5F1E/NDUFS8/NDUFB6/NDUFC1/NDUFA7/NDUFV3/NDUFA6/STOML2/NDUFA12/ATP5PO/NDUFA13/ATP5ME/NDUFB3	20
GO:0060070	canonical Wnt signaling pathway	69/2876	323/18888	0.213622	1.40295	3.09573	0.00187848	0.0414936	0.0376307	IGFBP2/DKK3/COL6A1/TMEM9/RBPJ/FZD5/PFDN5/RAB5A/DIXDC1/RBX1/LMBR1L/ANKRD6/TLE4/CTNNBIP1/MDK/DDIT3/GID8/GPRC5B/RUVBL2/TBL1X/CDK14/DAPK3/PTPRU/RNF14/GPC3/EDNRB/FZD2/UBAC2/SIAH2/ATP6AP2/LATS1/DDX3X/LGR5/USP8/INVS/ZNF703/ILK/YAP1/MKS1/PTK7/APOE/SHH/SOX9/TMEM64/LRP5/TCF7L2/FUZ/LEF1/MESP1/LIMD1/NOTCH1/ASPM/FZD7/SMAD3/RYK/WNT4/FOXO1/FZD6/SOX13/NPHP3/FZD8/WNT10B/IGFBP4/SFRP2/BICC1/TPBGL/ADGRA2/KREMEN1/DIS…	69
GO:0042176	regulation of protein catabolic process	76/2876	362/18888	0.209945	1.3788	3.08411	0.00188297	0.0414936	0.0376307	PSMD10/USP9X/PRKACA/EEF1A2/USP14/TMEM9/CDK5RAP3/NSF/MAP1A/RGMA/DDB1/MFSD8/CLU/SF3B3/TMF1/OAZ1/RBX1/TIMP1/GABARAPL2/CAMLG/PSMD1/ZYG11B/SGTA/SNF8/PSME1/DDRGK1/BAG5/RNF41/RAD23A/CST3/BBS7/PSMC4/ATRAID/NOP53/PSMC2/PINK1/FAF1/MSN/ALAD/RGP1/GPC3/CD81/NDUFA13/PSMD14/DESI1/MAD2L1/TMX1/USP8/GCLC/DCAF1/CDC20/APOE/SHH/SOX9/RHBDD3/SNX9/SH3RF3/LRP2/DNAAF4/SMAD3/CDK2/ANXA2/WFS1/FOXO1/PLK1/BAG2/DTL/WNT10B/SVIP/…	76
GO:0006497	protein lipidation	26/2876	96/18888	0.270833	1.77869	3.24164	0.00192925	0.0419151	0.038013	GOLGA7/UGCG/ATG4A/ZDHHC17/WDR45B/WIPI2/PIGF/PIGQ/DPM1/ZDHHC16/ZDHHC20/ZDHHC4/SLC30A5/PIGH/ATG101/PIGM/PIGS/PIGZ/PIGK/DPM3/WIPI1/PIGP/ZDHHC14/PIGA/SVIP/WDR45	26
GO:0006637	acyl-CoA metabolic process	26/2876	96/18888	0.270833	1.77869	3.24164	0.00192925	0.0419151	0.038013	PDK3/ACSL4/FAR1/SLC25A1/ELOVL5/MVD/MMUT/MVK/HACD2/DLAT/MCEE/NUDT7/MLYCD/ACOT8/AASS/ACAT1/GPAM/ELOVL1/ACSS1/GCDH/ACSS2/NUDT19/HACD1/DGAT2/NUDT8/SUCLG2	26
GO:0035383	thioester metabolic process	26/2876	96/18888	0.270833	1.77869	3.24164	0.00192925	0.0419151	0.038013	PDK3/ACSL4/FAR1/SLC25A1/ELOVL5/MVD/MMUT/MVK/HACD2/DLAT/MCEE/NUDT7/MLYCD/ACOT8/AASS/ACAT1/GPAM/ELOVL1/ACSS1/GCDH/ACSS2/NUDT19/HACD1/DGAT2/NUDT8/SUCLG2	26
GO:0009261	ribonucleotide catabolic process	35/2876	141/18888	0.248227	1.63022	3.18338	0.00192967	0.0419151	0.038013	ENO2/HK2/PRKACA/PKM/COL6A1/PGAM1/GPI/HK1/ENO1/HINT1/DDIT4/PFKP/ALDOC/EIF6/FOXK2/NT5C/ENTPD7/LIPA/NUDT7/GCK/PRKAA2/ADPGK/MLYCD/ACAT1/UPP1/UCP2/TIGAR/NUDT19/PGM1/PDE8A/PRXL2C/NUDT8/ENO3/SUCLG2/PPARA	35
GO:0009066	aspartate family amino acid metabolic process	15/2876	45/18888	0.333333	2.18915	3.38471	0.00194378	0.0419222	0.0380194	SMS/GOT2/APIP/PLOD2/GOT1/ASNSD1/MTHFR/SLC25A13/MRI1/AASS/NIT2/MTRR/ASS1/RIDA/MTAP	15
GO:0044786	cell cycle DNA replication	15/2876	45/18888	0.333333	2.18915	3.38471	0.00194378	0.0419222	0.0380194	LIG1/DACH1/DONSON/WRN/FEN1/MCM6/MCM2/CDT1/POLA1/ZPR1/GINS1/DBF4/BRCA2/E2F7/TK1	15
GO:1901875	positive regulation of post-translational protein modification	33/2876	131/18888	0.251908	1.6544	3.18529	0.001976	0.0424288	0.0384789	PSMD10/PTTG1IP/GNL3/CDK5RAP3/RBX1/HSPA5/TOLLIP/MALT1/NOP53/DCUN1D5/DCUN1D4/PINK1/HDAC3/BCL10/DCUN1D2/TNIP1/CENPX/SAE1/DDX3X/CRY1/CENPS/CDC20/TSPYL5/RIPK2/FBXO33/UBE2C/NHLRC1/WFS1/PLK1/FANCM/RASD2/FBXO4/SPSB4	33
GO:0000910	cytokinesis	44/2876	188/18888	0.234043	1.53706	3.13644	0.00198122	0.0424288	0.0384789	BCL2L1/UNC119/ARF1/MYH10/CHMP2A/ORC4/UVRAG/SEPTIN6/MAP9/EXOC2/RHOC/ARL3/BBS4/ACTR2/BECN1/SEPTIN8/USP8/CALM1/BIN3/NUSAP1/DRD2/CETN2/CHMP2B/SNX9/BIRC5/AURKB/MAP10/PLK1/MYH9/SEPTIN1/SNX18/CENPA/KLHL21/ESPL1/BRCA2/AURKA/KLHL13/IQGAP1/SNX33/E2F7/CDC6/KIF23/AURKC/CDC14A	44
GO:0009394	2'-deoxyribonucleotide metabolic process	14/2876	41/18888	0.341463	2.24255	3.37549	0.00210309	0.0447238	0.0405602	DGUOK/NEIL2/NUDT16/GUK1/DCTPP1/NT5C/TYMS/DTYMK/UNG/MBD4/NT5M/UPP1/RRM2B/SHMT1	14
GO:0036297	interstrand cross-link repair	14/2876	41/18888	0.341463	2.24255	3.37549	0.00210309	0.0447238	0.0405602	ERCC1/RNF8/CENPX/CENPS/RNF168/FANCC/FANCG/DCLRE1A/RFWD3/FANCM/FANCB/FANCE/RAD51AP1/NEIL3	14
GO:0170039	proteinogenic amino acid metabolic process	36/2876	147/18888	0.244898	1.60836	3.13815	0.00215505	0.0456691	0.0414175	CTPS2/SMS/GPT2/GOT2/PSAT1/ALDH18A1/GFPT1/SEPHS2/SEPHS1/APIP/ATP2B4/PLOD2/GOT1/PYCR2/THNSL2/SHMT2/SRR/ASNSD1/MTHFR/GFPT2/PPAT/SLC25A13/GCLC/MRI1/AASS/GSTZ1/OAT/NIT2/MTRR/ASS1/UCP2/PYCR3/RIDA/CTH/MTAP/SHMT1	36
GO:0006490	oligosaccharide-lipid intermediate biosynthetic process	9/2876	21/18888	0.428571	2.81462	3.52613	0.00223241	0.0465803	0.0422438	ALG13/ALG3/DPM1/DHDDS/ALG2/RFT1/ALG8/DPAGT1/ALG1	9
GO:0051383	kinetochore organization	9/2876	21/18888	0.428571	2.81462	3.52613	0.00223241	0.0465803	0.0422438	RNF4/CENPX/SMC2/KNTC1/CENPA/NUF2/CENPE/NDC80/CENPK	9
GO:0090266	regulation of mitotic cell cycle spindle assembly checkpoint	9/2876	21/18888	0.428571	2.81462	3.52613	0.00223241	0.0465803	0.0422438	LCMT1/DUSP1/MAD2L1/CCNB1/MAD2L1BP/BIRC5/GEN1/AURKB/NDC80	9
GO:1903504	regulation of mitotic spindle checkpoint	9/2876	21/18888	0.428571	2.81462	3.52613	0.00223241	0.0465803	0.0422438	LCMT1/DUSP1/MAD2L1/CCNB1/MAD2L1BP/BIRC5/GEN1/AURKB/NDC80	9
GO:0051985	negative regulation of chromosome segregation	16/2876	50/18888	0.32	2.10159	3.30551	0.00225166	0.0465803	0.0422438	LCMT1/BUB3/DUSP1/MAD2L1/CCNB1/CDC20/MAD2L1BP/KNTC1/BIRC5/GEN1/AURKB/PLK1/TRIP13/TTK/NUF2/NDC80	16
GO:1902100	negative regulation of metaphase/anaphase transition of cell cycle	16/2876	50/18888	0.32	2.10159	3.30551	0.00225166	0.0465803	0.0422438	LCMT1/BUB3/DUSP1/MAD2L1/CCNB1/CDC20/MAD2L1BP/KNTC1/BIRC5/GEN1/AURKB/PLK1/TRIP13/TTK/NUF2/NDC80	16
GO:1905819	negative regulation of chromosome separation	16/2876	50/18888	0.32	2.10159	3.30551	0.00225166	0.0465803	0.0422438	LCMT1/BUB3/DUSP1/MAD2L1/CCNB1/CDC20/MAD2L1BP/KNTC1/BIRC5/GEN1/AURKB/PLK1/TRIP13/TTK/NUF2/NDC80	16
GO:0000422	autophagy of mitochondrion	27/2876	102/18888	0.264706	1.73844	3.16923	0.00228964	0.047046	0.0426662	BNIP3L/MAP1LC3B/HK2/VDAC1/SLC25A4/CDC37/FZD5/ATG4A/GABARAPL2/WDR45B/RNF41/WIPI2/PARL/ARFIP2/SNX30/PINK1/USP36/CISD2/ATG9A/SPATA18/BECN1/WIPI1/ULK3/FBXO7/TSPO/TIGAR/WDR45	27
GO:0042158	lipoprotein biosynthetic process	27/2876	102/18888	0.264706	1.73844	3.16923	0.00228964	0.047046	0.0426662	GOLGA7/UGCG/ATG4A/ZDHHC17/WDR45B/WIPI2/PIGF/PIGQ/DPM1/ZDHHC16/ZDHHC20/ZDHHC4/SLC30A5/PIGH/ATG101/PIGM/PIGS/PIGZ/PIGK/APOE/DPM3/WIPI1/PIGP/ZDHHC14/PIGA/SVIP/WDR45	27
[truncated: 4 more rows]

## Sheet: InhibN-MGE_Down
ID	Description	GeneRatio	BgRatio	RichFactor	FoldEnrichment	zScore	pvalue	p.adjust	qvalue	geneID	Count
[truncated: 183 more rows]

## Sheet: IP-InhibN-CGE_Up
ID	Description	GeneRatio	BgRatio	RichFactor	FoldEnrichment	zScore	pvalue	p.adjust	qvalue	geneID	Count
[truncated: 193 more rows]

[truncated: 13 more sheets: IP-InhibN-CGE_Down, IP-InhibN-MGE_Up, IP-InhibN-MGE_Down, StressN_Up, StressN_Down, NPC_Up, NPC_Down, ExN_Up, ExN_Down, IP_Up, IP_Down, IP-ExN_Up, IP-ExN_Down]
