# Supplementary material for: Human forebrain assembloids modeling a neurodevelopmental disorder reveals neural circuit deficits via DNA damage
Source: Research Square preprint supplement (doi:10.21203/rs.3.rs-7957934/v1), 2025-11-14
Supplement: Supplementary file 4 [file 99f050bf338131f2c4d3732e.xlsx]

## Sheet: GE NPC
Gene	p_val	avg_log2FC	pct.1	pct.2	p_val_adj
C1orf61	0	1.31674	0.483	0.28	0
CHCHD2	0	-3.6368	0.025	0.222	0
USP9X	0	1.15275	0.348	0.179	0
PEG3	0	5.00912	0.17	0.006	0
INPP5F	0	1.85078	0.253	0.092	0
CDK16	0	0.785488	0.471	0.315	0
DDX3Y	0	-13.6136	0	0.149	0
PEG10	0	-0.728024	0.572	0.717	0
DCX	0	0.992944	0.882	0.739	0
CASK	0	0.673741	0.443	0.308	0
CHRDL1	0	0.989837	0.316	0.187	0
EIF1AY	0	-15.487	0	0.129	0
PSMD10	0	0.8667	0.309	0.184	0
USP11	0	0.604053	0.449	0.326	0
HNRNPH3	0	0.608818	0.45	0.331	0
NAP1L3	0	1.02112	0.236	0.118	0
EIF3L	0	1.26193	0.219	0.104	0
UTY	0	-15.2276	0	0.106	0
SYAP1	0	0.922571	0.219	0.118	0
LRCH2	0	0.897561	0.215	0.114	0
KDM5D	0	-10.8715	0	0.084	0
USP9Y	0	-14.6963	0	0.071	0
ZFY	0	-13.7996	0	0.042	0
ZNF558	0	-4.91801	0.001	0.034	0
NNAT	0	0.523409	0.979	0.961	0
NLGN2	5.06968e-307	0.984722	0.195	0.104	9.16852e-303
PAK3	1.10052e-305	1.0572	0.158	0.074	1.9903e-301
SPTAN1	1.84666e-305	0.797305	0.249	0.146	3.33968e-301
ALG13	4.59247e-301	0.805177	0.22	0.122	8.30548e-297
TOP2A	4.56117e-300	-0.514953	0.473	0.569	8.24887e-296
RBBP7	2.06949e-297	0.725774	0.276	0.169	3.74267e-293
PTMS	2.535e-296	0.573376	0.371	0.253	4.58455e-292
ARL4D	2.83693e-292	1.02797	0.185	0.098	5.13059e-288
TLCD3B	1.75545e-290	1.33905	0.131	0.058	3.17473e-286
SP8	6.16393e-288	0.742758	0.337	0.228	1.11475e-283
KANSL1	1.47631e-284	1.12043	0.167	0.085	2.66991e-280
H1F0	2.0945e-281	0.665677	0.252	0.149	3.7879e-277
KALRN	3.03927e-270	1.01154	0.192	0.106	5.49653e-266
SCD	2.38149e-264	-0.358183	0.567	0.644	4.30692e-260
IDH2	5.76947e-261	0.794212	0.221	0.131	1.04341e-256
ATP6AP2	2.80479e-257	1.10334	0.15	0.075	5.07247e-253
ARRDC3	4.05449e-257	0.545481	0.457	0.347	7.33254e-253
ID4	2.65365e-250	-0.448091	0.485	0.567	4.79913e-246
CTPS2	1.5617e-248	0.786578	0.193	0.108	2.82433e-244
H1FX	2.17617e-248	0.498908	0.523	0.424	3.9356e-244
UBA1	7.23291e-246	1.019	0.148	0.075	1.30807e-241
DDIT4	8.14929e-242	0.303054	0.574	0.467	1.4738e-237
GNAQ	8.47779e-236	0.549977	0.379	0.273	1.53321e-231
CHL1	7.27e-229	1.15657	0.097	0.04	1.31478e-224
KHDRBS1	1.39031e-228	0.918472	0.171	0.096	2.51437e-224
TBL1Y	3.75569e-227	-12.6203	0	0.019	6.79217e-223
HNRNPU	4.39585e-224	0.915752	0.166	0.092	7.94989e-220
SRSF4	1.96468e-218	0.891219	0.172	0.098	3.55312e-214
HIST1H1C	2.62268e-218	-0.339932	0.702	0.757	4.74312e-214
KLF12	6.81497e-216	0.983095	0.148	0.08	1.23249e-211
QKI	4.32718e-214	0.427852	0.578	0.487	7.82571e-210
MT-CYB	1.99545e-213	-0.235629	0.828	0.882	3.60878e-209
IGF2BP1	3.96446e-211	0.795299	0.196	0.119	7.16972e-207
COL4A5	3.13512e-210	0.787797	0.214	0.135	5.66987e-206
PAX6	3.1618e-209	0.6094	0.272	0.182	5.71811e-205
SPINK5	8.65293e-209	3.52588	0.031	0.002	1.56488e-204
PDPR	8.09305e-208	-0.965614	0.103	0.169	1.46363e-203
PLS3	3.22677e-205	1.26602	0.086	0.035	5.83561e-201
IGF1R	2.28512e-202	1.08983	0.11	0.053	4.13264e-198
VAX1	5.19089e-194	-0.748075	0.151	0.222	9.38772e-190
HIST1H2BB	7.7419e-193	1.86495	0.06	0.019	1.40012e-188
RAF1	6.91583e-192	0.945126	0.134	0.072	1.25073e-187
RASA1	1.73777e-191	1.07619	0.111	0.055	3.14276e-187
ERBB4	5.03843e-190	0.749974	0.14	0.076	9.112e-186
TLE1	1.53357e-187	0.635068	0.26	0.178	2.77346e-183
HNRNPA0	4.32104e-187	0.39252	0.59	0.51	7.81461e-183
COL4A6	7.64226e-187	0.947653	0.142	0.079	1.3821e-182
ADGRL3	1.13044e-185	1.16326	0.093	0.042	2.0444e-181
NLGN4X	2.14556e-185	0.854686	0.128	0.068	3.88024e-181
ASPH	5.13701e-184	0.660524	0.214	0.139	9.29029e-180
HIST1H2BH	1.31073e-182	-0.52269	0.335	0.409	2.37046e-178
PRPF8	1.57254e-182	0.967554	0.133	0.073	2.84394e-178
NCL	4.39149e-177	0.817717	0.166	0.1	7.942e-173
FADS2	4.72112e-177	-0.363306	0.493	0.559	8.53814e-173
KLC1	7.88667e-176	0.630033	0.211	0.137	1.4263e-171
BCL11B	1.62847e-172	0.789079	0.181	0.113	2.94509e-168
HSPA1B	3.90168e-172	0.968112	0.13	0.072	7.05619e-168
KAT6B	1.43238e-170	0.566198	0.309	0.226	2.59047e-166
GRIK2	5.15991e-170	-1.32926	0.043	0.087	9.33169e-166
TSTD1	1.94775e-168	2.05513	0.038	0.008	3.52251e-164
VEGFA	1.45796e-166	0.357511	0.429	0.336	2.63672e-162
MED14	1.73555e-165	0.726047	0.174	0.108	3.13874e-161
PCDHA10	3.57033e-165	1.65702	0.054	0.018	6.45695e-161
PFN2	8.74126e-165	0.281223	0.783	0.746	1.58086e-160
ADGRG1	2.7212e-159	0.496667	0.322	0.239	4.92128e-155
AMMECR1	8.41447e-159	0.800341	0.151	0.09	1.52176e-154
STARD3NL	1.00995e-157	0.669085	0.185	0.119	1.8265e-153
UBE2QL1	1.05329e-155	-0.549282	0.238	0.306	1.90487e-151
HES1	2.00912e-155	0.989662	0.115	0.063	3.63349e-151
TMSB15B	1.31276e-154	0.560304	0.174	0.109	2.37412e-150
MEST	2.37685e-154	0.330639	0.473	0.379	4.29853e-150
ST8SIA4	3.37431e-154	1.29921	0.067	0.028	6.10243e-150
HNRNPA2B1	6.03382e-154	-0.258402	0.682	0.735	1.09122e-149
JMJD1C	1.29752e-153	0.95196	0.115	0.064	2.34657e-149
BAHCC1	1.86729e-153	0.932572	0.115	0.063	3.37699e-149
GAP43	1.60167e-152	-0.560282	0.228	0.295	2.89662e-148
KAT6A	1.7027e-152	0.796285	0.145	0.088	3.07934e-148
C11orf87	5.31128e-151	-0.894332	0.108	0.164	9.60544e-147
PIK3R3	5.58689e-151	-0.469793	0.31	0.378	1.01039e-146
BEX3	7.60212e-151	0.306197	0.66	0.593	1.37484e-146
PLAGL1	1.15114e-150	0.943824	0.105	0.056	2.08183e-146
TMSB4Y	2.33406e-149	-12.0934	0	0.013	4.22115e-145
MT-ND2	1.74756e-148	-0.188539	0.82	0.865	3.16047e-144
ATP5PO	5.60801e-148	6.4052	0.018	0	1.01421e-143
KIF1A	5.71538e-148	0.461524	0.225	0.153	1.03363e-143
KDM4B	1.08535e-147	0.905952	0.117	0.065	1.96286e-143
ZNF736	2.5629e-147	2.47334	0.028	0.005	4.635e-143
TM9SF2	5.71899e-147	0.665842	0.184	0.12	1.03428e-142
FBL	9.53436e-147	1.05359	0.089	0.045	1.72429e-142
PHC1	2.12831e-146	0.544729	0.228	0.157	3.84904e-142
LMNB1	9.5563e-145	-0.341786	0.467	0.526	1.72826e-140
DPYSL3	3.96188e-144	-0.271901	0.669	0.718	7.16506e-140
HS6ST2	5.78792e-144	0.66524	0.19	0.126	1.04674e-139
HNRNPLL	2.54246e-143	0.920513	0.112	0.063	4.59804e-139
SEPTIN11	2.16234e-142	-0.285587	0.591	0.641	3.91058e-138
GPC2	1.31347e-141	-0.383905	0.417	0.483	2.37541e-137
POLA1	5.30176e-141	0.912637	0.102	0.055	9.58824e-137
TCEAL3	6.32519e-141	0.684437	0.135	0.08	1.14391e-136
TCF4	3.0656e-140	0.414294	0.373	0.291	5.54414e-136
STAG2	6.06512e-140	0.834417	0.124	0.073	1.09688e-135
ANXA2	1.72593e-139	-1.21396	0.038	0.075	3.12134e-135
HSPA1A	4.82005e-138	1.77212	0.04	0.012	8.71706e-134
FSTL1	7.13067e-138	-0.593343	0.172	0.233	1.28958e-133
PHB2	2.34971e-137	1.05528	0.086	0.043	4.24946e-133
KMT2E	3.33772e-137	0.470708	0.3	0.224	6.03626e-133
TMED7	1.1685e-135	0.805487	0.131	0.079	2.11323e-131
TSHZ1	2.00196e-135	0.575423	0.177	0.116	3.62054e-131
BAG6	6.68269e-135	0.419401	0.369	0.29	1.20856e-130
KLHDC3	1.34441e-134	0.687387	0.149	0.093	2.43136e-130
KDM6A	4.85557e-134	0.92745	0.093	0.049	8.78129e-130
ATP5MC2	5.91006e-134	0.465224	0.307	0.232	1.06884e-129
HNRNPK	5.10227e-133	-0.406441	0.236	0.306	9.22745e-129
CDK6	1.09645e-130	-0.719246	0.121	0.175	1.98294e-126
DDX3X	3.06935e-130	0.603017	0.202	0.139	5.55092e-126
VANGL2	3.28764e-130	0.533131	0.204	0.14	5.9457e-126
GNRH1	5.60108e-130	-1.4651	0.041	0.078	1.01296e-125
ATRX	9.83878e-129	0.663442	0.166	0.109	1.77934e-124
TMEM158	5.78693e-128	0.826316	0.117	0.069	1.04657e-123
NELL2	1.65299e-127	1.19326	0.057	0.024	2.98944e-123
TXLNG	1.08908e-126	0.950198	0.081	0.041	1.9696e-122
LRRC61	1.13089e-126	4.29592	0.017	0.001	2.04522e-122
MEIS1	2.91353e-126	0.467409	0.233	0.165	5.26912e-122
PHF3	5.03756e-126	0.766801	0.115	0.067	9.11043e-122
WNT7A	2.75605e-125	0.48853	0.21	0.146	4.98433e-121
KCNN1	4.10164e-125	1.73269	0.039	0.012	7.41782e-121
MAT2A	5.549e-125	-0.293453	0.488	0.541	1.00354e-120
TMSB10	6.44375e-123	-0.154946	0.895	0.94	1.16535e-118
TSC22D3	1.00908e-122	0.94947	0.079	0.041	1.82492e-118
HIST1H1B	1.07642e-122	-0.213481	0.673	0.729	1.9467e-118
COL1A2	1.29744e-122	-1.61886	0.018	0.045	2.34643e-118
HMGN4	4.07202e-122	0.987332	0.085	0.045	7.36425e-118
ARNT2	4.9386e-122	0.924949	0.085	0.045	8.93147e-118
EPHA7	2.39384e-121	0.669578	0.122	0.073	4.32926e-117
SEPTIN2	2.36331e-120	0.610525	0.183	0.126	4.27405e-116
SERTAD4	4.2814e-120	0.662282	0.123	0.075	7.74291e-116
ANOS1	7.04563e-120	1.32735	0.046	0.017	1.2742e-115
WASF3	1.45239e-119	0.487597	0.223	0.159	2.62665e-115
TAC1	1.76757e-119	-0.917656	0.07	0.113	3.19666e-115
HIF3A	1.97579e-119	0.689923	0.136	0.086	3.57323e-115
ZIM2	1.22887e-118	2.55126	0.022	0.003	2.22241e-114
ENC1	1.23711e-118	-0.334302	0.381	0.443	2.23731e-114
PLXNB2	9.58168e-118	0.531357	0.229	0.166	1.73285e-113
AP1S2	9.98293e-118	0.478509	0.185	0.125	1.80541e-113
ING4	7.95922e-117	1.14485	0.066	0.032	1.43942e-112
KDM3B	1.26964e-115	0.632236	0.156	0.103	2.29614e-111
KPNA5	7.02721e-115	0.81549	0.105	0.061	1.27087e-110
GLCE	8.18329e-114	0.531985	0.161	0.107	1.47995e-109
IVNS1ABP	2.51865e-113	0.71466	0.129	0.081	4.55498e-109
MTMR10	4.51396e-113	-1.06822	0.029	0.059	8.1635e-109
HECTD1	1.42326e-112	0.63118	0.15	0.099	2.57397e-108
KLHDC2	1.77909e-112	0.568534	0.183	0.127	3.21748e-108
CRYZ	3.18027e-112	-1.07383	0.041	0.075	5.75152e-108
KDM3A	1.84999e-111	0.359533	0.33	0.257	3.3457e-107
CCDC50	2.46707e-111	0.678831	0.138	0.089	4.4617e-107
ATP5F1A	2.49409e-111	0.712118	0.126	0.08	4.51055e-107
PLD3	4.22164e-111	0.549164	0.176	0.121	7.63484e-107
FAM199X	1.36999e-110	0.563306	0.195	0.138	2.47763e-106
MT-CO2	3.41834e-110	0.152954	0.932	0.925	6.18207e-106
STAU2	1.11242e-109	0.408032	0.315	0.245	2.01182e-105
TMEM131L	1.59491e-109	0.596747	0.179	0.124	2.8844e-105
NAP1L5	1.73776e-109	0.594695	0.123	0.076	3.14274e-105
KLHL25	2.6967e-108	0.940595	0.085	0.047	4.87699e-104
STAU1	3.72844e-108	0.519167	0.203	0.145	6.74288e-104
CNTNAP4	3.64427e-107	0.895355	0.077	0.041	6.59066e-103
KIRREL1	7.35406e-107	1.15764	0.053	0.024	1.32998e-102
SRP54	7.48256e-107	0.811793	0.101	0.06	1.35322e-102
CENPU	4.04088e-106	-0.578695	0.173	0.224	7.30792e-102
ENO2	7.08762e-106	-0.360565	0.558	0.598	1.2818e-101
TMSB15A	7.43343e-106	-0.23926	0.659	0.698	1.34434e-101
PCYT1B	9.9717e-106	0.565543	0.153	0.102	1.80338e-101
CD99	1.27497e-105	-0.403262	0.238	0.294	2.30578e-101
TRPS1	1.5274e-105	0.961127	0.076	0.041	2.7623e-101
IFT81	6.55722e-105	0.690385	0.118	0.074	1.18587e-100
VPS72	1.00258e-104	0.685904	0.134	0.087	1.81316e-100
DPYSL2	1.74408e-104	-0.202696	0.72	0.759	3.15417e-100
AMOT	1.57844e-103	0.762041	0.079	0.043	2.8546e-99
ARL2BP	2.5658e-103	0.639684	0.142	0.094	4.64026e-99
SLC4A7	3.416e-103	0.342257	0.375	0.302	6.17784e-99
ATXN2	5.77171e-103	0.623016	0.15	0.101	1.04381e-98
PCDH11X	8.22639e-103	1.46046	0.036	0.013	1.48774e-98
NBL1	2.63362e-102	0.602949	0.113	0.069	4.7629e-98
C2CD5	3.40991e-102	0.79733	0.092	0.054	6.16683e-98
IPO5	4.11752e-102	0.723664	0.115	0.072	7.44654e-98
PRRC2A	5.02302e-102	0.739235	0.112	0.07	9.08414e-98
MDK	4.60367e-101	-0.391368	0.314	0.367	8.32573e-97
HMOX1	6.03077e-101	-1.94572	0.007	0.024	1.09066e-96
SMDT1	6.3389e-101	0.412291	0.253	0.19	1.14639e-96
TCEAL1	9.58682e-101	0.664504	0.098	0.058	1.73378e-96
PHACTR3	1.96304e-100	1.18042	0.052	0.024	3.55016e-96
ACTG1	3.11435e-100	0.126767	0.938	0.932	5.6323e-96
SCRT2	6.56693e-100	0.477647	0.177	0.123	1.18763e-95
ZFHX3	7.50249e-100	-0.562424	0.183	0.233	1.35682e-95
HMGB2	7.80077e-100	-0.383895	0.359	0.409	1.41077e-95
NSG1	3.31734e-99	0.326973	0.346	0.274	5.99942e-95
PRMT2	1.06346e-98	0.486034	0.216	0.159	1.92326e-94
BRINP1	1.40599e-98	0.950355	0.06	0.03	2.54272e-94
ZNF248	6.13407e-98	-1.00985	0.041	0.073	1.10935e-93
NRP1	2.10355e-97	-1.15886	0.032	0.061	3.80426e-93
INTS8	4.16881e-97	0.753724	0.104	0.064	7.53929e-93
ACVR2B	4.20798e-97	0.401586	0.253	0.192	7.61013e-93
CALB2	8.48933e-96	0.576863	0.119	0.076	1.5353e-91
ADGRV1	9.10927e-96	-0.405248	0.239	0.293	1.64741e-91
HEY1	4.68789e-95	0.870608	0.067	0.035	8.47805e-91
SRPK2	7.89961e-95	0.560863	0.151	0.103	1.42864e-90
CIRBP	1.49556e-94	-0.185437	0.761	0.795	2.70472e-90
EBF1	2.88948e-94	-0.889776	0.057	0.092	5.22563e-90
SYT6	2.97031e-94	0.573123	0.103	0.063	5.3718e-90
SCUBE1	4.80894e-94	0.771722	0.075	0.041	8.69697e-90
LMNB2	7.48114e-94	-0.393201	0.301	0.351	1.35296e-89
GYG2	3.03815e-93	0.674052	0.089	0.052	5.49449e-89
TIMM8B	1.39122e-92	0.7029	0.108	0.068	2.51603e-88
PSMB1	4.62004e-92	-0.330512	0.371	0.42	8.35535e-88
HNRNPC	5.28474e-92	0.372777	0.322	0.257	9.55744e-88
TMEM14A	8.92505e-92	0.79962	0.093	0.057	1.6141e-87
UCHL1	1.05067e-91	-0.206623	0.678	0.712	1.90013e-87
LRRTM2	6.07262e-91	0.7383	0.08	0.046	1.09823e-86
MID1	8.44287e-91	0.716083	0.12	0.079	1.52689e-86
DACH1	4.56436e-90	0.481863	0.162	0.113	8.25464e-86
LMO1	5.21997e-90	-0.444839	0.233	0.284	9.44031e-86
HSDL1	2.26615e-89	0.516862	0.157	0.109	4.09834e-85
ST8SIA2	2.67144e-89	0.571827	0.145	0.1	4.83129e-85
EIF4G2	4.15548e-89	0.388305	0.274	0.214	7.51518e-85
PTPRT	6.28185e-89	-1.28421	0.017	0.038	1.13607e-84
DHFR	1.75754e-88	-0.463007	0.234	0.282	3.17852e-84
SPPL2B	2.73641e-88	0.554597	0.144	0.099	4.9488e-84
KPNB1	9.5956e-88	0.623108	0.108	0.069	1.73536e-83
MEX3C	1.68005e-87	-0.421991	0.235	0.284	3.03836e-83
JMY	2.01641e-87	1.17538	0.043	0.019	3.64667e-83
PRKX	4.50682e-87	0.916208	0.047	0.022	8.15059e-83
IBTK	5.30539e-87	0.675453	0.112	0.073	9.59479e-83
ALKBH7	6.69369e-87	0.481312	0.171	0.122	1.21055e-82
SPTBN2	6.73821e-87	0.588972	0.119	0.078	1.2186e-82
JAM3	9.08961e-87	0.514529	0.156	0.109	1.64386e-82
KLHDC8A	1.03131e-86	0.317759	0.269	0.208	1.86512e-82
SEPTIN7	1.85702e-86	0.808032	0.088	0.053	3.35842e-82
MDGA1	3.26511e-86	0.811593	0.072	0.04	5.90495e-82
CKB	7.35375e-86	-0.120707	0.94	0.955	1.32993e-81
HSPA4L	1.42823e-85	0.865653	0.064	0.035	2.58295e-81
LGALS1	1.47076e-85	-0.97267	0.032	0.059	2.65987e-81
TBL1X	1.66626e-85	0.673266	0.084	0.05	3.01343e-81
KIF1B	2.60714e-85	0.253569	0.535	0.467	4.71501e-81
CKAP2	3.98815e-85	-0.503414	0.205	0.251	7.21257e-81
ITM2C	5.17974e-85	0.387259	0.312	0.253	9.36756e-81
JAK2	7.83452e-85	0.831775	0.073	0.042	1.41687e-80
NAB2	1.27108e-84	0.579867	0.125	0.084	2.29874e-80
ITCH	1.35964e-84	0.641113	0.119	0.079	2.45891e-80
PHF1	2.02285e-84	0.548102	0.14	0.096	3.65833e-80
NHSL1	3.01716e-84	1.08535	0.05	0.025	5.45654e-80
TM7SF3	8.70216e-84	0.86458	0.074	0.043	1.57379e-79
THRA	9.27383e-84	0.491119	0.147	0.103	1.67717e-79
RNF44	2.21687e-83	0.441876	0.198	0.146	4.00922e-79
FAN1	2.24147e-83	-0.85423	0.039	0.068	4.0537e-79
EGLN3	3.89884e-83	0.386968	0.199	0.147	7.05106e-79
PNPO	6.0611e-83	-1.71461	0.006	0.02	1.09615e-78
RSRC2	6.23419e-83	0.442157	0.192	0.142	1.12745e-78
NRP2	7.50374e-83	1.12661	0.049	0.024	1.35705e-78
UAP1L1	7.71336e-83	-2.16953	0.004	0.015	1.39496e-78
NBR1	1.18911e-82	0.603802	0.116	0.077	2.1505e-78
TMEM11	1.8863e-82	0.881338	0.071	0.04	3.41137e-78
PKIB	3.92489e-82	1.42799	0.03	0.011	7.09816e-78
TMEM167A	4.52183e-82	0.758785	0.086	0.052	8.17772e-78
ITPK1	1.56089e-81	0.486614	0.141	0.098	2.82286e-77
EIF4H	1.82635e-81	0.619272	0.118	0.079	3.30296e-77
ATF2	2.81805e-81	0.35578	0.307	0.247	5.09645e-77
ZNF559	3.29677e-81	0.459629	0.173	0.126	5.9622e-77
TMEM164	3.88274e-81	1.60402	0.027	0.009	7.02193e-77
IRAK1	4.17952e-81	1.19011	0.04	0.018	7.55867e-77
REC8	6.49096e-81	0.801047	0.063	0.035	1.17389e-76
SLTM	7.46572e-81	0.503186	0.174	0.128	1.35018e-76
KIAA1324L	9.15251e-81	0.433563	0.166	0.119	1.65523e-76
PSMB4	2.93825e-80	0.616583	0.11	0.072	5.31383e-76
TUT4	3.35654e-80	0.466363	0.181	0.133	6.07031e-76
IGLON5	3.55807e-80	0.587868	0.12	0.08	6.43476e-76
HIST1H1E	1.0331e-79	-0.297563	0.403	0.449	1.86836e-75
RASD1	1.08526e-79	-0.623847	0.091	0.129	1.96269e-75
SOX3	1.49519e-79	0.443943	0.225	0.173	2.70405e-75
EIF3M	3.00809e-79	0.791623	0.078	0.047	5.44012e-75
HSPH1	5.52061e-79	0.596321	0.127	0.087	9.98403e-75
PDK1	6.92843e-79	0.468056	0.13	0.089	1.25301e-74
FZD5	9.03072e-79	-0.674379	0.094	0.131	1.63321e-74
ARVCF	9.03661e-79	0.578382	0.123	0.083	1.63427e-74
RAP2C	1.40884e-78	0.460498	0.137	0.095	2.54788e-74
TIMP2	4.11305e-78	0.416561	0.156	0.112	7.43846e-74
MT-ND4	1.05756e-77	0.123356	0.919	0.919	1.91259e-73
PCDHB14	1.11159e-77	0.832381	0.065	0.037	2.01032e-73
TOMM7	2.3294e-77	0.341702	0.271	0.214	4.21271e-73
LSM14A	7.37451e-77	0.960253	0.055	0.029	1.33368e-72
SLCO1C1	9.78655e-77	-1.62096	0.01	0.026	1.7699e-72
JADE1	1.08829e-76	0.711688	0.09	0.056	1.96818e-72
KLHL28	3.05768e-76	0.655657	0.091	0.057	5.52981e-72
MT-CO3	4.11336e-76	-0.106629	0.951	0.975	7.43902e-72
ST6GALNAC5	3.50431e-75	0.467816	0.173	0.127	6.33755e-71
CARNMT1	3.63351e-75	0.728252	0.073	0.044	6.57119e-71
IGF2BP3	4.42028e-75	0.565236	0.128	0.089	7.99408e-71
VPS54	6.34015e-75	0.664926	0.092	0.059	1.14662e-70
NEUROD6	6.75239e-75	2.34832	0.017	0.004	1.22117e-70
IFT52	8.8945e-75	0.64546	0.095	0.061	1.60857e-70
ARL6IP1	1.99073e-74	0.500004	0.146	0.105	3.60024e-70
SAMD14	4.22653e-74	0.842187	0.066	0.038	7.64369e-70
ARL6IP6	5.842e-74	0.64271	0.092	0.059	1.05653e-69
PPP6R2	5.90097e-74	0.619424	0.114	0.078	1.06719e-69
JUN	1.04856e-73	0.477752	0.227	0.177	1.89633e-69
HES6	1.09122e-73	-0.287428	0.391	0.436	1.97348e-69
SLC30A7	1.14835e-73	0.807798	0.07	0.041	2.07678e-69
EFNB2	1.23462e-73	0.271765	0.55	0.494	2.23281e-69
L1CAM	1.62518e-73	0.353969	0.225	0.173	2.93914e-69
TIMP3	2.75593e-73	1.70812	0.023	0.007	4.98409e-69
TMEM14C	3.87428e-73	0.65003	0.091	0.058	7.00664e-69
ST6GAL2	5.57222e-73	1.33944	0.033	0.014	1.00774e-68
KLHL8	6.30219e-73	0.811896	0.071	0.042	1.13975e-68
IMPAD1	9.68726e-73	0.421867	0.172	0.126	1.75194e-68
POLR2H	1.08794e-72	0.5427	0.13	0.091	1.96753e-68
SRPRB	1.18808e-72	0.740714	0.077	0.048	2.14865e-68
CSDE1	1.44582e-72	0.601684	0.106	0.071	2.61477e-68
EIF4G1	1.62827e-72	0.815657	0.066	0.038	2.94473e-68
IFNAR1	1.91695e-72	0.577289	0.106	0.071	3.46681e-68
NES	2.47323e-72	-0.239846	0.558	0.589	4.47284e-68
ZNF680	4.61838e-72	0.376379	0.166	0.121	8.35234e-68
IGSF8	6.75158e-72	0.841222	0.067	0.039	1.22102e-67
SEMA3A	7.82676e-72	0.547168	0.113	0.077	1.41547e-67
IER2	8.83246e-72	0.5223	0.125	0.086	1.59735e-67
TJP1	2.52793e-71	0.868169	0.064	0.037	4.57176e-67
NUSAP1	4.01542e-71	-0.302465	0.356	0.401	7.26189e-67
CADM2	4.84075e-71	0.37977	0.143	0.101	8.7545e-67
HIST3H2A	5.02888e-71	0.83118	0.056	0.031	9.09473e-67
PCDHB13	7.59346e-71	0.723236	0.058	0.032	1.37328e-66
H2AFZ	1.13641e-70	-0.235197	0.445	0.486	2.0552e-66
TMEM138	1.29937e-70	0.855708	0.064	0.037	2.34991e-66
IAH1	2.19242e-70	0.983615	0.048	0.025	3.96498e-66
HCN3	2.6692e-70	0.650359	0.089	0.057	4.82726e-66
RUNX1T1	3.04173e-70	0.300052	0.281	0.225	5.50097e-66
AMER2	3.97553e-70	0.387746	0.177	0.132	7.18975e-66
ICK	4.75318e-70	1.02329	0.047	0.024	8.59613e-66
BAG1	8.01014e-70	0.527337	0.125	0.087	1.44863e-65
CXorf38	8.83203e-70	0.673427	0.076	0.046	1.59727e-65
SHTN1	1.04911e-69	-0.339856	0.269	0.314	1.89731e-65
VAT1L	4.19513e-69	-0.482197	0.181	0.222	7.58689e-65
ATXN1	4.42661e-69	0.377486	0.153	0.11	8.00552e-65
ADAM10	4.64509e-69	0.586504	0.099	0.066	8.40065e-65
PDK3	6.408e-69	0.541438	0.089	0.057	1.15889e-64
INSM1	6.46573e-69	0.508205	0.151	0.11	1.16933e-64
LGALS3	9.54997e-69	-1.59794	0.007	0.02	1.72711e-64
HM13	1.05863e-68	0.409547	0.153	0.111	1.91454e-64
POLK	1.20847e-68	0.874732	0.057	0.032	2.18551e-64
RAB3GAP1	3.39393e-68	0.574343	0.105	0.071	6.13791e-64
TSC2	3.5202e-68	0.36143	0.156	0.113	6.36628e-64
RAB9B	6.36241e-68	0.780329	0.052	0.028	1.15064e-63
NEDD4L	7.42748e-68	0.22822	0.579	0.527	1.34326e-63
ATP6V1F	9.56988e-68	0.373975	0.219	0.17	1.73071e-63
KIFC1	1.5054e-67	-0.382852	0.244	0.286	2.72252e-63
KIAA1549	1.54288e-67	0.420913	0.156	0.115	2.7903e-63
FBXW7	6.04825e-67	0.517099	0.134	0.096	1.09383e-62
PRKCA	7.88929e-67	0.504641	0.107	0.072	1.42678e-62
BCR	1.06157e-66	0.649154	0.083	0.053	1.91986e-62
LRIF1	1.14182e-66	0.491	0.119	0.083	2.06499e-62
USP37	1.24934e-66	0.807321	0.061	0.035	2.25943e-62
HECTD4	1.36103e-66	0.637795	0.087	0.057	2.46143e-62
ITSN1	1.3991e-66	0.648886	0.092	0.06	2.53027e-62
HIP1R	1.94973e-66	0.543821	0.093	0.061	3.5261e-62
GTF2IRD1	1.96874e-66	0.69156	0.079	0.05	3.56046e-62
DSEL	2.22366e-66	-0.905004	0.045	0.071	4.02149e-62
KDM6B	2.3496e-66	0.332781	0.236	0.185	4.24925e-62
VRK1	4.10382e-66	0.455342	0.161	0.119	7.42176e-62
SPAG7	5.30714e-66	0.636684	0.083	0.053	9.59796e-62
RADX	6.43886e-66	0.537816	0.079	0.049	1.16447e-61
TIMM50	6.77414e-66	0.702974	0.082	0.053	1.2251e-61
PLCB1	9.33608e-66	0.758796	0.065	0.039	1.68843e-61
ST7	1.13153e-65	0.586628	0.096	0.064	2.04636e-61
ADCY2	1.27958e-65	0.73235	0.056	0.031	2.31412e-61
SDK2	1.42348e-65	0.641449	0.076	0.048	2.57437e-61
KLF13	1.43367e-65	-0.790912	0.038	0.063	2.5928e-61
CDH11	2.57892e-65	0.592153	0.094	0.062	4.66397e-61
KIAA0100	3.08671e-65	0.410103	0.186	0.142	5.58232e-61
SOX1	3.59226e-65	-0.359622	0.26	0.301	6.4966e-61
PSAT1	4.5428e-65	0.339752	0.377	0.323	8.21566e-61
PCDHB11	7.32829e-65	0.492136	0.087	0.056	1.32532e-60
HIST2H2BE	1.2662e-64	0.59523	0.092	0.061	2.28992e-60
NDNF	1.43831e-64	1.15972	0.029	0.012	2.60118e-60
NRARP	1.98265e-64	0.566547	0.131	0.095	3.58563e-60
ZFP3	2.47815e-64	1.01812	0.037	0.018	4.48173e-60
TERF2	3.34005e-64	0.669525	0.078	0.05	6.04048e-60
RTL8A	4.26666e-64	0.386922	0.154	0.113	7.71626e-60
COX7A2	4.4928e-64	0.339699	0.204	0.158	8.12522e-60
ZNF608	5.0798e-64	0.436938	0.14	0.102	9.18683e-60
COX20	6.58089e-64	-0.724703	0.056	0.084	1.19015e-59
PABPC5	8.02415e-64	0.936987	0.039	0.02	1.45117e-59
FUS	9.6549e-64	-0.278354	0.416	0.451	1.74609e-59
TMEM121B	1.02764e-63	0.760316	0.055	0.031	1.85848e-59
KAT8	1.11379e-63	0.667856	0.083	0.054	2.0143e-59
KMT5C	1.20034e-63	0.84531	0.061	0.036	2.17082e-59
PCDHB12	1.60903e-63	0.554515	0.078	0.049	2.90994e-59
KPNA3	1.99044e-63	0.477245	0.143	0.105	3.59972e-59
TMEM159	2.02063e-63	0.891261	0.051	0.028	3.6543e-59
ETFB	2.07738e-63	-0.328626	0.277	0.32	3.75694e-59
SSBP2	2.11541e-63	0.371402	0.19	0.146	3.82573e-59
ACIN1	2.29753e-63	0.703824	0.084	0.054	4.15508e-59
TMEM106B	2.68993e-63	0.630967	0.085	0.055	4.86473e-59
SRSF2	2.84032e-63	-0.299645	0.35	0.387	5.13672e-59
ATP1B2	3.4881e-63	0.307724	0.327	0.272	6.30823e-59
CAMK2N1	3.81853e-63	0.309614	0.288	0.234	6.90582e-59
SNU13	5.16112e-63	-0.262757	0.369	0.408	9.33389e-59
NEFL	7.50076e-63	-0.930944	0.044	0.069	1.35651e-58
AMFR	9.2515e-63	0.370964	0.19	0.147	1.67313e-58
LMO3	1.15741e-62	-0.391578	0.212	0.252	2.09318e-58
PICALM	2.30598e-62	0.374562	0.191	0.147	4.17036e-58
H3F3A	3.10748e-62	-0.155399	0.751	0.776	5.61988e-58
ADAM23	6.37046e-62	0.801699	0.053	0.03	1.1521e-57
PLXNA3	8.1939e-62	0.518179	0.125	0.09	1.48187e-57
AHSA1	1.00595e-61	0.369408	0.208	0.163	1.81926e-57
ATG4A	1.63721e-61	0.819951	0.047	0.026	2.96089e-57
SOD1	1.7351e-61	0.551783	0.101	0.069	3.13792e-57
DLL3	1.8429e-61	-0.50435	0.13	0.167	3.33288e-57
PYROXD2	2.17928e-61	-1.27767	0.013	0.029	3.94123e-57
SNAP25	2.73687e-61	0.531215	0.119	0.085	4.94963e-57
PTGDS	1.25719e-60	-1.30032	0.013	0.028	2.27363e-56
KIF26A	1.31734e-60	0.388587	0.147	0.108	2.38242e-56
TM9SF3	1.33779e-60	0.299247	0.27	0.219	2.41939e-56
CENPM	1.49713e-60	-0.347044	0.258	0.298	2.70755e-56
DLK1	1.62032e-60	-0.678359	0.077	0.107	2.93036e-56
ARHGAP21	2.3085e-60	0.439687	0.153	0.114	4.17491e-56
TMEM151B	2.40734e-60	0.616035	0.072	0.045	4.35367e-56
HTATSF1	2.72027e-60	0.371694	0.181	0.139	4.91961e-56
HIRIP3	2.72316e-60	0.562132	0.104	0.072	4.92484e-56
PTPRD	3.30349e-60	0.307366	0.22	0.173	5.97436e-56
ASH2L	3.48872e-60	0.708376	0.068	0.042	6.30935e-56
TXNDC15	4.26654e-60	0.347057	0.188	0.144	7.71603e-56
SRGAP1	4.35336e-60	0.469655	0.125	0.09	7.87305e-56
RTL6	5.23246e-60	0.433367	0.132	0.095	9.4629e-56
SPATA18	5.58903e-60	1.75659	0.019	0.006	1.01078e-55
ZFP36L1	8.36349e-60	0.364107	0.393	0.346	1.51254e-55
SORCS1	1.19698e-59	-0.526688	0.106	0.14	2.16473e-55
KCTD6	1.57305e-59	0.669165	0.065	0.04	2.84486e-55
HYOU1	1.76241e-59	0.571556	0.099	0.068	3.18731e-55
UBA2	1.77227e-59	0.423268	0.164	0.124	3.20515e-55
SAMD4B	1.91861e-59	0.475046	0.126	0.091	3.46981e-55
MEX3B	3.24822e-59	0.333194	0.238	0.19	5.8744e-55
SRSF12	3.29579e-59	0.625474	0.072	0.046	5.96044e-55
CD9	3.39633e-59	-0.747959	0.051	0.077	6.14226e-55
VPS13C	4.00483e-59	0.468504	0.126	0.091	7.24273e-55
SAP30BP	1.11677e-58	0.754729	0.063	0.039	2.01968e-54
ATG12	1.87132e-58	0.771882	0.065	0.04	3.38429e-54
SYNGAP1	2.21503e-58	0.391276	0.155	0.116	4.00588e-54
TAGLN3	2.47213e-58	0.250219	0.275	0.222	4.47086e-54
SLC2A3	2.47295e-58	0.703966	0.054	0.032	4.47232e-54
SS18L1	3.17166e-58	0.381736	0.179	0.138	5.73595e-54
PUDP	3.79183e-58	1.07607	0.03	0.013	6.85753e-54
BEGAIN	3.99378e-58	1.23203	0.027	0.012	7.22275e-54
AC091057.6	4.93992e-58	-0.941204	0.028	0.049	8.93384e-54
PSRC1	5.08595e-58	-0.482154	0.126	0.161	9.19794e-54
TMSB15B.1	5.88183e-58	0.705543	0.053	0.031	1.06373e-53
PTPRS	6.25047e-58	-0.189543	0.58	0.61	1.1304e-53
NOP58	8.81375e-58	0.508644	0.119	0.085	1.59397e-53
PABPC4	1.05529e-57	0.938724	0.043	0.023	1.90849e-53
R3HDM2	1.14731e-57	0.592301	0.08	0.052	2.0749e-53
HTT	1.2106e-57	0.531846	0.094	0.064	2.18937e-53
SPG7	1.52618e-57	0.289318	0.249	0.201	2.76009e-53
PHF6	1.56979e-57	0.554235	0.092	0.062	2.83896e-53
NMT2	1.72695e-57	0.769039	0.059	0.036	3.12319e-53
SYT4	1.92964e-57	-0.941555	0.04	0.063	3.48975e-53
PCDH8	3.37952e-57	0.779841	0.037	0.018	6.11186e-53
ABHD17B	4.84824e-57	0.346482	0.16	0.121	8.76804e-53
PPIL3	6.22304e-57	0.504022	0.086	0.058	1.12544e-52
KDM4A	6.86354e-57	0.413812	0.141	0.105	1.24127e-52
MT-ND5	7.86155e-57	-0.256358	0.444	0.477	1.42176e-52
PKM	1.3575e-56	-0.234747	0.445	0.479	2.45505e-52
IFT80	1.55494e-56	0.774787	0.056	0.033	2.81211e-52
DEK	1.68337e-56	-0.350652	0.199	0.237	3.04437e-52
NUCKS1	1.77516e-56	-0.277909	0.394	0.428	3.21037e-52
ATRNL1	1.97998e-56	0.180371	0.613	0.558	3.58079e-52
COPE	2.18939e-56	0.577974	0.09	0.061	3.95951e-52
ZNF177	2.38343e-56	0.723584	0.061	0.037	4.31043e-52
KIDINS220	2.6051e-56	0.259033	0.395	0.343	4.71132e-52
SELENOI	2.99269e-56	0.500919	0.093	0.063	5.41228e-52
SOX9	3.78852e-56	0.235675	0.544	0.491	6.85153e-52
SBF1	4.38429e-56	0.357678	0.173	0.133	7.92899e-52
GABRB2	4.7385e-56	-1.01087	0.032	0.052	8.56957e-52
NLK	5.19435e-56	0.263792	0.258	0.208	9.39399e-52
ITGB8	5.26986e-56	0.34744	0.253	0.207	9.53053e-52
PFKFB3	5.51974e-56	0.314611	0.178	0.137	9.98245e-52
DIAPH2	5.92506e-56	0.854405	0.048	0.027	1.07155e-51
NAV3	6.97984e-56	0.509821	0.087	0.058	1.2623e-51
TUSC1	8.83708e-56	0.897766	0.039	0.02	1.59819e-51
SHF	1.00599e-55	0.386694	0.151	0.114	1.81933e-51
ARHGAP23	1.04847e-55	0.733236	0.065	0.041	1.89616e-51
CAMLG	1.22734e-55	0.318102	0.193	0.151	2.21964e-51
MYL6	1.67659e-55	-0.174934	0.554	0.584	3.03212e-51
SOCS5	1.74607e-55	0.917367	0.046	0.026	3.15777e-51
L3MBTL1	2.36437e-55	0.465419	0.096	0.066	4.27597e-51
SRC	2.38398e-55	0.45275	0.132	0.098	4.31143e-51
ATOX1	2.62862e-55	0.454053	0.128	0.094	4.75385e-51
HNRNPH2	2.89119e-55	0.519182	0.099	0.069	5.22871e-51
MPPED2	4.50418e-55	0.178628	0.595	0.543	8.14581e-51
SCAI	5.55882e-55	0.597737	0.08	0.053	1.00531e-50
ADGRL2	6.07272e-55	0.577734	0.074	0.048	1.09825e-50
HEATR5B	6.08871e-55	0.865293	0.044	0.025	1.10114e-50
HGS	6.40056e-55	0.440837	0.132	0.097	1.15754e-50
GOLM1	7.61486e-55	0.279791	0.264	0.215	1.37715e-50
CCNI	8.56439e-55	-0.158008	0.697	0.72	1.54887e-50
ST5	1.24076e-54	0.752098	0.056	0.034	2.24392e-50
METTL17	1.84228e-54	0.479576	0.1	0.07	3.33176e-50
AKAP11	1.85486e-54	0.350138	0.225	0.182	3.35451e-50
TMEM167B	2.39227e-54	0.72451	0.062	0.038	4.32641e-50
WSCD1	2.41077e-54	0.522125	0.092	0.063	4.35987e-50
INO80E	2.51142e-54	0.596042	0.087	0.059	4.5419e-50
NSG2	2.59544e-54	0.299105	0.254	0.208	4.69386e-50
HMBOX1	4.16419e-54	0.521266	0.106	0.075	7.53093e-50
SSH1	4.92112e-54	0.917298	0.044	0.025	8.89984e-50
ARL6IP5	6.16327e-54	0.482092	0.107	0.076	1.11463e-49
TMEM59	7.7248e-54	0.69039	0.069	0.045	1.39703e-49
HELZ	8.02633e-54	0.505333	0.114	0.082	1.45156e-49
UCP2	8.35492e-54	-0.545476	0.108	0.139	1.51099e-49
CPNE6	8.36673e-54	0.855741	0.032	0.016	1.51312e-49
CACNA1H	9.57807e-54	0.283894	0.203	0.159	1.73219e-49
UPF2	1.17028e-53	0.965746	0.04	0.022	2.11644e-49
TXNIP	1.1728e-53	0.217843	0.421	0.364	2.12101e-49
MAPK1IP1L	1.22126e-53	-0.349111	0.27	0.305	2.20865e-49
TMCO1	2.0986e-53	0.344241	0.203	0.162	3.79533e-49
ST6GAL1	2.44134e-53	0.997322	0.027	0.012	4.41517e-49
HSF1	2.52701e-53	0.459411	0.116	0.084	4.57009e-49
GAS8	3.79865e-53	-0.992737	0.029	0.048	6.86986e-49
CACNA1C	5.491e-53	0.864549	0.043	0.024	9.93047e-49
JTB	8.25515e-53	0.72303	0.064	0.04	1.49294e-48
DCLK2	8.75908e-53	-0.20964	0.599	0.632	1.58408e-48
LEPROTL1	8.96605e-53	0.275996	0.249	0.202	1.62151e-48
CPLX2	1.43687e-52	0.27488	0.171	0.131	2.59857e-48
TM2D3	1.46999e-52	0.375211	0.16	0.123	2.65848e-48
NFAT5	1.83343e-52	0.362434	0.144	0.108	3.31576e-48
ATP9B	2.06418e-52	0.485853	0.111	0.08	3.73307e-48
PNISR	2.15423e-52	0.304379	0.242	0.197	3.89592e-48
VEPH1	3.12241e-52	0.567994	0.09	0.063	5.64688e-48
NPDC1	4.77692e-52	0.224722	0.365	0.308	8.63905e-48
KIAA1143	4.82963e-52	0.641098	0.066	0.043	8.73438e-48
ZNF578	6.12078e-52	-1.87257	0.004	0.013	1.10694e-47
EFS	6.90468e-52	0.242705	0.275	0.226	1.24871e-47
IER5L	7.52746e-52	0.559923	0.068	0.044	1.36134e-47
JARID2	8.07645e-52	0.565626	0.078	0.052	1.46063e-47
CNTNAP5	1.1909e-51	1.15704	0.025	0.011	2.15375e-47
ZNF536	1.44727e-51	0.849631	0.037	0.019	2.61738e-47
IFIT5	1.56054e-51	0.800937	0.044	0.025	2.82223e-47
UBE2C	1.82408e-51	-0.413447	0.215	0.25	3.29885e-47
SREBF2	2.11231e-51	0.224899	0.46	0.407	3.82011e-47
TIMM44	3.04598e-51	0.702487	0.063	0.04	5.50865e-47
CREB5	3.42075e-51	0.31904	0.239	0.195	6.18642e-47
RPAIN	3.56388e-51	0.289563	0.263	0.216	6.44527e-47
AURKAIP1	5.2773e-51	0.438968	0.126	0.094	9.544e-47
KIF3A	6.00589e-51	0.328917	0.178	0.139	1.08616e-46
RAB3A	6.33431e-51	0.285575	0.19	0.149	1.14556e-46
RAB1A	7.19753e-51	0.653723	0.072	0.047	1.30167e-46
INO80B	8.65247e-51	0.535085	0.087	0.06	1.5648e-46
TMCO3	9.07516e-51	0.677971	0.067	0.043	1.64124e-46
CDK1	9.45569e-51	-0.233967	0.328	0.366	1.71006e-46
FGF3	1.11816e-50	-2.14762	0.003	0.011	2.0222e-46
SHISA2	1.27037e-50	0.4746	0.127	0.094	2.29746e-46
AUTS2	1.28801e-50	-0.235925	0.471	0.498	2.32937e-46
SEC61G	1.68225e-50	0.493998	0.1	0.071	3.04236e-46
GPSM2	2.32416e-50	-0.493469	0.124	0.156	4.20325e-46
VAMP2	2.457e-50	0.243171	0.312	0.261	4.44348e-46
ZWINT	2.60305e-50	-0.458411	0.14	0.172	4.70761e-46
CACNG7	3.00542e-50	0.270673	0.215	0.172	5.4353e-46
RPGRIP1L	5.83815e-50	0.954123	0.039	0.021	1.05583e-45
PSD3	5.84427e-50	-0.377944	0.173	0.208	1.05694e-45
KCNA5	6.73329e-50	0.802615	0.045	0.026	1.21772e-45
LIX1	7.33603e-50	0.337595	0.211	0.17	1.32672e-45
NCKAP1	7.42921e-50	0.246601	0.275	0.227	1.34357e-45
ZFX	8.49473e-50	0.588912	0.067	0.044	1.53627e-45
NUDCD3	9.62777e-50	0.44234	0.109	0.079	1.74118e-45
GOLGA3	1.09497e-49	0.515349	0.084	0.058	1.98025e-45
BSDC1	1.16929e-49	0.302283	0.205	0.164	2.11466e-45
PSAP	1.22429e-49	-0.246494	0.383	0.416	2.21414e-45
IFRD1	1.41767e-49	0.716514	0.058	0.037	2.56386e-45
SEC31A	1.52776e-49	0.265703	0.349	0.298	2.76295e-45
PAK1	2.19804e-49	0.742191	0.048	0.029	3.97515e-45
PRRC1	2.60502e-49	0.39905	0.121	0.089	4.71118e-45
HINT3	2.63032e-49	0.378881	0.13	0.097	4.75693e-45
RELN	2.73109e-49	-1.02703	0.027	0.045	4.93918e-45
TMEM147	4.02361e-49	0.547939	0.082	0.056	7.2767e-45
IFFO2	4.61923e-49	1.2337	0.023	0.01	8.35387e-45
HDHD5	4.80024e-49	0.647088	0.068	0.045	8.68124e-45
ST7L	5.0137e-49	0.995379	0.033	0.017	9.06728e-45
ACSL4	5.37675e-49	0.363827	0.113	0.082	9.72386e-45
HFM1	6.76568e-49	0.610852	0.06	0.038	1.22357e-44
GABRB3	1.17293e-48	0.243177	0.163	0.125	2.12124e-44
AZIN1	1.73779e-48	0.322837	0.173	0.136	3.14279e-44
CCNB2	2.91326e-48	-0.360106	0.187	0.221	5.26863e-44
PMS1	3.02856e-48	0.421958	0.115	0.084	5.47714e-44
HNRNPL	3.34309e-48	-0.224974	0.453	0.481	6.04597e-44
ARHGAP11B	4.02557e-48	-1.33568	0.009	0.02	7.28025e-44
NSMF	4.13953e-48	0.352801	0.154	0.119	7.48634e-44
RSL1D1	4.26034e-48	0.84209	0.041	0.024	7.70482e-44
SPCS3	4.77618e-48	0.618776	0.065	0.042	8.63772e-44
LHX8	5.21239e-48	-1.52837	0.01	0.022	9.4266e-44
STAT2	8.02953e-48	0.779721	0.046	0.027	1.45214e-43
PAG1	9.18438e-48	-0.541259	0.088	0.116	1.66099e-43
ZADH2	9.31739e-48	0.307698	0.157	0.121	1.68505e-43
RUFY2	9.99326e-48	0.338067	0.159	0.123	1.80728e-43
JRK	1.16367e-47	0.832094	0.041	0.024	2.10449e-43
HSF2	1.181e-47	0.361063	0.131	0.098	2.13585e-43
RFTN1	1.33629e-47	-1.01092	0.023	0.04	2.41667e-43
ZRSR2	1.59905e-47	0.977785	0.025	0.011	2.89188e-43
CBLN2	1.78512e-47	0.901873	0.027	0.013	3.22839e-43
SOCS7	2.00065e-47	0.5592	0.083	0.057	3.61817e-43
NFIL3	4.45432e-47	0.35429	0.135	0.102	8.05563e-43
HEPACAM	4.75086e-47	-1.26144	0.014	0.027	8.59192e-43
KDM1A	5.83659e-47	0.214644	0.407	0.356	1.05555e-42
TSPYL4	5.9881e-47	0.317036	0.196	0.157	1.08295e-42
TDRP	6.28006e-47	0.434021	0.104	0.075	1.13575e-42
ABR	6.90015e-47	-0.399955	0.179	0.212	1.24789e-42
RCOR3	7.06656e-47	0.562492	0.076	0.052	1.27799e-42
ST8SIA1	9.59175e-47	0.351836	0.13	0.098	1.73467e-42
HERC4	9.94097e-47	0.397052	0.127	0.096	1.79782e-42
SLC38A1	1.18077e-46	0.220474	0.307	0.257	2.13542e-42
RTL5	1.19735e-46	0.836525	0.04	0.023	2.1654e-42
FGD4	1.31494e-46	0.904021	0.039	0.022	2.37808e-42
KLHDC10	1.42524e-46	0.38999	0.128	0.097	2.57755e-42
SNX17	1.87954e-46	0.490664	0.086	0.06	3.39915e-42
ABCG1	1.90859e-46	-0.546177	0.092	0.119	3.45169e-42
TIMP1	2.04644e-46	0.399489	0.112	0.082	3.70099e-42
JRKL	3.59732e-46	0.977706	0.03	0.015	6.50576e-42
SERBP1	4.1826e-46	0.293899	0.2	0.16	7.56423e-42
KATNAL1	5.24803e-46	0.456905	0.107	0.078	9.49107e-42
TMEM115	5.3344e-46	0.790774	0.047	0.029	9.64727e-42
VEZF1	5.59599e-46	0.295338	0.259	0.216	1.01203e-41
CDH2	5.92517e-46	0.182702	0.608	0.567	1.07157e-41
PTAR1	6.49817e-46	0.333946	0.196	0.157	1.17519e-41
FASN	6.80974e-46	-0.209191	0.409	0.441	1.23154e-41
TMEM161A	6.86566e-46	0.897195	0.036	0.02	1.24166e-41
DAB1	6.8813e-46	0.436964	0.076	0.051	1.24448e-41
SRRM2	7.7394e-46	0.412129	0.127	0.096	1.39967e-41
SYT10	1.11864e-45	0.586211	0.064	0.042	2.02306e-41
FLRT2	1.20187e-45	-0.440262	0.134	0.165	2.17359e-41
FXYD7	1.21188e-45	0.545082	0.058	0.037	2.19169e-41
TLNRD1	1.28046e-45	0.706637	0.058	0.037	2.31571e-41
SLC22A17	1.39451e-45	0.242837	0.311	0.263	2.52196e-41
RRP7A	1.46189e-45	-0.534664	0.075	0.101	2.64383e-41
TACC3	1.56782e-45	-0.385165	0.183	0.216	2.83541e-41
CFL1	1.62223e-45	-0.129452	0.693	0.724	2.93381e-41
WLS	1.67433e-45	0.250816	0.235	0.193	3.02803e-41
SPC24	1.91699e-45	-0.387993	0.184	0.216	3.46687e-41
LAMP1	2.02526e-45	-0.369358	0.204	0.237	3.66269e-41
POMP	2.04701e-45	0.668679	0.062	0.041	3.70201e-41
HIPK1	2.48643e-45	0.382147	0.12	0.09	4.4967e-41
VWCE	4.12531e-45	0.722206	0.045	0.027	7.46062e-41
CAST	4.22347e-45	-0.552952	0.053	0.076	7.63815e-41
IGSF9B	4.59604e-45	0.354043	0.105	0.077	8.31194e-41
NRXN1	5.77216e-45	-0.259539	0.354	0.385	1.0439e-40
UBE3B	6.41094e-45	0.748462	0.05	0.031	1.15942e-40
ANKRD37	7.74651e-45	0.586362	0.044	0.026	1.40096e-40
SF3B5	7.81926e-45	0.267252	0.24	0.197	1.41411e-40
ASGR1	8.03854e-45	0.616918	0.052	0.033	1.45377e-40
FKBP11	9.22102e-45	0.776256	0.042	0.025	1.66762e-40
PIK3C2B	1.10794e-44	0.495964	0.088	0.063	2.0037e-40
FXR2	1.46538e-44	0.652728	0.059	0.039	2.65015e-40
TMOD2	1.72528e-44	0.249419	0.189	0.15	3.12017e-40
SNRPB	1.76663e-44	-0.228035	0.395	0.425	3.19495e-40
PAPSS1	2.19002e-44	0.277856	0.213	0.174	3.96066e-40
STOX2	2.27783e-44	0.338907	0.137	0.105	4.11945e-40
EGFR	2.64048e-44	-0.645265	0.063	0.086	4.7753e-40
NTRK3	2.70965e-44	0.304414	0.219	0.178	4.90041e-40
PTPN12	3.19828e-44	0.231369	0.233	0.19	5.78409e-40
SPEN	3.93999e-44	0.303532	0.188	0.151	7.12547e-40
IL1RAPL2	3.99063e-44	1.70081	0.012	0.003	7.21705e-40
VPS13B	4.404e-44	0.352918	0.129	0.098	7.96464e-40
PHLDA1	4.41e-44	0.293442	0.188	0.15	7.97549e-40
PRC1	4.52006e-44	-0.345539	0.168	0.2	8.17453e-40
HCFC2	4.56753e-44	0.50721	0.087	0.062	8.26038e-40
HSPA13	6.73697e-44	0.284922	0.211	0.172	1.21838e-39
EEF2	7.70717e-44	-0.130969	0.645	0.673	1.39384e-39
POU3F2	7.89118e-44	-0.244108	0.249	0.284	1.42712e-39
MCM3	8.64579e-44	-0.438222	0.127	0.156	1.56359e-39
UBE2I	1.2301e-43	-0.210388	0.437	0.465	2.22463e-39
MT-ND1	1.35625e-43	-0.155158	0.568	0.594	2.45278e-39
RUSC1	1.4956e-43	0.336692	0.149	0.116	2.70479e-39
NIPBL	2.77679e-43	0.309562	0.17	0.135	5.02183e-39
BCL2L1	2.94197e-43	0.204351	0.222	0.18	5.32056e-39
SEC11C	2.94445e-43	0.246985	0.238	0.196	5.32504e-39
NKIRAS2	3.01544e-43	0.350231	0.147	0.115	5.45343e-39
FBXO42	3.14249e-43	0.467645	0.076	0.053	5.6832e-39
PTTG1	3.6171e-43	-0.283506	0.258	0.292	6.54152e-39
ARMCX6	4.15606e-43	0.959987	0.033	0.018	7.51624e-39
TIMM17A	4.3485e-43	0.701891	0.052	0.033	7.86426e-39
EFNB1	4.515e-43	0.227178	0.405	0.357	8.16538e-39
TIMMDC1	4.57509e-43	0.681002	0.053	0.034	8.27406e-39
TMEM127	4.67883e-43	0.663786	0.06	0.04	8.46166e-39
TMEM258	4.93337e-43	0.920846	0.033	0.018	8.92199e-39
ATG4B	5.01725e-43	0.35592	0.146	0.114	9.07369e-39
C9orf40	5.04591e-43	0.52224	0.063	0.042	9.12553e-39
TSPAN11	5.95214e-43	0.336518	0.154	0.121	1.07645e-38
REV1	6.70659e-43	0.496089	0.089	0.064	1.21289e-38
HIPK3	6.89666e-43	0.257964	0.239	0.197	1.24726e-38
LNPK	7.08979e-43	0.306652	0.183	0.147	1.28219e-38
VSNL1	8.23533e-43	-1.15799	0.017	0.031	1.48936e-38
SKIL	9.78766e-43	0.251053	0.201	0.162	1.7701e-38
KLHL24	1.16215e-42	0.299895	0.196	0.158	2.10175e-38
LHFPL6	1.3841e-42	0.197416	0.356	0.307	2.50314e-38
SAP30L	1.57331e-42	0.821513	0.045	0.027	2.84533e-38
NCOA3	1.61883e-42	0.621549	0.053	0.034	2.92766e-38
LAMTOR5	1.63779e-42	0.778087	0.042	0.025	2.96195e-38
BBX	1.87255e-42	0.531638	0.067	0.045	3.3865e-38
NOL4	2.46723e-42	0.272273	0.111	0.082	4.46198e-38
ZNF493	2.6786e-42	0.412205	0.104	0.077	4.84426e-38
U2SURP	2.83374e-42	0.27258	0.198	0.16	5.12482e-38
IMPACT	3.14613e-42	0.56349	0.07	0.048	5.68978e-38
TMEM132A	3.38195e-42	0.297078	0.133	0.101	6.11626e-38
RPE65	3.8105e-42	-1.07233	0.012	0.024	6.89129e-38
RTKN2	5.84417e-42	-0.458896	0.147	0.176	1.05692e-37
PLCB4	6.93645e-42	0.514351	0.065	0.044	1.25446e-37
KIAA0408	7.84871e-42	0.265986	0.23	0.191	1.41944e-37
ATP6V0B	8.09814e-42	0.322958	0.146	0.114	1.46455e-37
ISLR2	9.37704e-42	-0.379399	0.241	0.271	1.69584e-37
PCBP3	9.68496e-42	0.632512	0.052	0.033	1.75153e-37
BCORL1	1.18672e-41	1.25609	0.02	0.009	2.14618e-37
HIVEP2	1.39592e-41	0.606707	0.05	0.032	2.52452e-37
TERF2IP	1.59287e-41	0.179016	0.442	0.389	2.88071e-37
RARA	2.1248e-41	0.366217	0.096	0.07	3.84271e-37
KRTCAP2	2.54101e-41	0.462948	0.091	0.066	4.59541e-37
SYNM	2.73032e-41	-0.760616	0.031	0.049	4.93779e-37
PSD2	2.7732e-41	0.411371	0.072	0.05	5.01533e-37
SLC35G2	2.92661e-41	0.401429	0.082	0.058	5.29277e-37
FBXL16	3.06466e-41	0.484455	0.071	0.049	5.54243e-37
TROAP	3.27595e-41	-0.529459	0.105	0.132	5.92456e-37
JMJD6	3.29502e-41	0.589965	0.062	0.041	5.95904e-37
EIF3I	3.4831e-41	0.958749	0.028	0.015	6.29919e-37
IMMT	3.70451e-41	0.315507	0.162	0.129	6.69961e-37
ACTL6B	4.48385e-41	0.307638	0.129	0.098	8.10904e-37
IGSF3	4.6641e-41	0.4345	0.091	0.066	8.43502e-37
ABCA1	4.80072e-41	-0.387221	0.172	0.201	8.6821e-37
NEUROD2	5.11811e-41	2.43908	0.01	0.003	9.25611e-37
STIM1	5.17766e-41	0.635442	0.056	0.036	9.3638e-37
CCNB1	5.53268e-41	-0.333139	0.257	0.288	1.00059e-36
ARF4	8.15422e-41	0.295706	0.177	0.142	1.47469e-36
MASP1	9.45732e-41	0.277062	0.15	0.117	1.71036e-36
IFI44	9.66328e-41	1.12005	0.025	0.013	1.7476e-36
TMEM128	9.98516e-41	0.407539	0.101	0.074	1.80582e-36
HSPB1	1.06494e-40	0.269448	0.278	0.237	1.92595e-36
TYW3	1.15558e-40	-1.00551	0.018	0.032	2.08987e-36
GPM6B	1.34701e-40	0.251461	0.461	0.414	2.43608e-36
TSPAN5	1.35643e-40	0.241157	0.275	0.232	2.4531e-36
NAB1	1.38547e-40	0.444229	0.108	0.081	2.50562e-36
RBP1	1.39453e-40	0.311331	0.127	0.097	2.522e-36
MPRIP	1.50044e-40	0.220798	0.283	0.24	2.71354e-36
TRIM4	1.53358e-40	-0.690975	0.035	0.053	2.77348e-36
FGD1	1.67528e-40	0.626529	0.055	0.036	3.02975e-36
MYH10	1.76974e-40	-0.224678	0.375	0.404	3.20057e-36
KHDRBS3	1.9063e-40	0.946626	0.024	0.012	3.44755e-36
RICTOR	1.97698e-40	0.550794	0.062	0.042	3.57537e-36
ACAT2	2.18116e-40	-0.234935	0.304	0.335	3.94463e-36
SORBS1	2.31011e-40	0.470233	0.069	0.047	4.17783e-36
ATAD3B	2.34367e-40	0.71338	0.047	0.03	4.23853e-36
CDK8	2.88784e-40	0.367609	0.101	0.075	5.22266e-36
UTRN	3.62782e-40	-0.546064	0.091	0.116	6.5609e-36
IL11RA	3.7117e-40	0.559746	0.056	0.037	6.7126e-36
INSIG2	4.27181e-40	0.596617	0.055	0.036	7.72558e-36
ADGRL1	4.30229e-40	0.331027	0.142	0.111	7.7807e-36
SLC39A10	4.36508e-40	0.314963	0.126	0.096	7.89425e-36
KLF6	4.45903e-40	0.525692	0.063	0.042	8.06415e-36
ZFAND3	5.2077e-40	0.205955	0.307	0.261	9.41813e-36
COL6A2	6.51413e-40	0.671274	0.046	0.028	1.17808e-35
TMCC1	8.26513e-40	0.864088	0.031	0.017	1.49475e-35
ZIC4	9.57079e-40	-1.62078	0.006	0.014	1.73088e-35
ACVR1	9.89933e-40	0.32855	0.133	0.103	1.79029e-35
IRF2BPL	1.0409e-39	0.23005	0.226	0.186	1.88248e-35
PTPRO	1.04101e-39	0.2251	0.183	0.147	1.88267e-35
SLITRK2	1.17279e-39	-0.679009	0.036	0.055	2.12098e-35
ZNF467	1.31822e-39	0.60014	0.042	0.026	2.38399e-35
MN1	1.33193e-39	-0.323654	0.236	0.265	2.40879e-35
FAM222A	1.34957e-39	0.339286	0.133	0.103	2.44069e-35
SETD5	1.53731e-39	0.202092	0.343	0.296	2.78022e-35
TSPAN13	1.83329e-39	0.288641	0.146	0.114	3.31551e-35
DPYSL4	2.86632e-39	-0.228247	0.412	0.439	5.18373e-35
STK11	2.87131e-39	0.418952	0.109	0.082	5.19276e-35
USPL1	3.71781e-39	0.454554	0.087	0.063	6.72366e-35
RNF4	4.00956e-39	-0.513072	0.114	0.141	7.25128e-35
BMP7	4.25685e-39	0.359695	0.142	0.111	7.6985e-35
PPHLN1	4.41181e-39	0.383994	0.121	0.093	7.97876e-35
SMAP2	5.18675e-39	0.292558	0.136	0.105	9.38023e-35
PNMA2	5.72783e-39	0.231455	0.252	0.211	1.03588e-34
ELOVL6	5.98833e-39	-0.414482	0.147	0.175	1.08299e-34
ZNF117	7.87437e-39	-0.499708	0.117	0.143	1.42408e-34
AKAP6	9.84901e-39	0.218695	0.235	0.195	1.78119e-34
ITGAV	1.34262e-38	0.437538	0.088	0.065	2.42813e-34
CCND1	1.64189e-38	0.365175	0.068	0.047	2.96935e-34
PREX2	1.65258e-38	0.435298	0.081	0.058	2.9887e-34
TIA1	1.66289e-38	-0.219037	0.374	0.401	3.00734e-34
GRK2	2.02138e-38	0.233008	0.236	0.196	3.65566e-34
PFN1	2.34033e-38	-0.182773	0.412	0.439	4.2325e-34
TMEM74B	2.64143e-38	0.311607	0.09	0.066	4.77703e-34
ATP6AP1L	3.0148e-38	1.09132	0.023	0.011	5.45226e-34
VPS52	3.13069e-38	0.364633	0.117	0.09	5.66186e-34
NCBP2AS2	3.56619e-38	0.649489	0.049	0.032	6.44945e-34
ZIC1	3.72357e-38	-0.539028	0.174	0.201	6.73408e-34
STK26	4.24626e-38	0.882777	0.025	0.013	7.67936e-34
ASXL3	4.29762e-38	0.503271	0.054	0.035	7.77224e-34
LONRF1	4.59749e-38	0.339073	0.116	0.089	8.31456e-34
NMU	4.7677e-38	-0.621911	0.048	0.068	8.62238e-34
MAPK6	5.73011e-38	0.192259	0.28	0.236	1.03629e-33
TMEFF1	5.87796e-38	0.179082	0.442	0.393	1.06303e-33
SRD5A1	7.94752e-38	0.750833	0.039	0.023	1.43731e-33
UNC79	9.01457e-38	0.445108	0.075	0.053	1.63029e-33
PCBP1	9.52375e-38	0.433853	0.095	0.071	1.72237e-33
TRIB3	9.66749e-38	-0.542346	0.059	0.08	1.74837e-33
SERTAD2	1.04512e-37	0.259124	0.106	0.079	1.8901e-33
PAFAH1B3	1.13154e-37	0.214293	0.292	0.25	2.0464e-33
TMEM106C	1.20699e-37	0.282975	0.143	0.113	2.18285e-33
TCAF1	1.24778e-37	0.220549	0.28	0.237	2.25662e-33
ARL6IP4	1.2626e-37	0.335794	0.149	0.118	2.28342e-33
COBL	1.395e-37	-1.12253	0.007	0.015	2.52287e-33
CDON	1.41537e-37	0.309676	0.155	0.124	2.55971e-33
BHLHE40	1.50892e-37	0.379613	0.061	0.041	2.72888e-33
RBM12B	1.55586e-37	0.482045	0.073	0.052	2.81377e-33
DTX4	1.75592e-37	0.34366	0.105	0.079	3.17558e-33
CDC25B	1.77907e-37	-0.366585	0.186	0.215	3.21744e-33
FAM118A	2.01474e-37	-0.447807	0.106	0.131	3.64365e-33
INSR	2.2819e-37	0.390341	0.086	0.063	4.12681e-33
NR2C2	2.3389e-37	0.338173	0.124	0.096	4.2299e-33
IFITM3	2.56606e-37	-0.820143	0.027	0.042	4.64072e-33
PGM2	2.65784e-37	0.555803	0.066	0.046	4.8067e-33
SELENOK	2.80504e-37	0.382714	0.104	0.078	5.07291e-33
ACVR1B	2.82409e-37	0.214545	0.168	0.134	5.10737e-33
NKIRAS1	2.83992e-37	0.402163	0.083	0.061	5.13599e-33
IDH3B	3.10225e-37	0.342359	0.135	0.106	5.61042e-33
HERC3	3.11367e-37	0.367688	0.094	0.07	5.63108e-33
IGDCC3	3.12406e-37	0.52612	0.054	0.035	5.64986e-33
KSR1	4.57934e-37	0.337998	0.129	0.1	8.28173e-33
VPS13A	4.7175e-37	0.454544	0.084	0.061	8.53159e-33
FNBP1L	4.89145e-37	-0.256529	0.352	0.378	8.84618e-33
HUWE1	4.97733e-37	0.314437	0.141	0.111	9.0015e-33
NOA1	6.25514e-37	0.525239	0.061	0.042	1.13124e-32
DPYD	6.86318e-37	-0.720847	0.041	0.059	1.24121e-32
ZNF141	6.96473e-37	-0.415962	0.126	0.153	1.25957e-32
ISG20L2	7.46212e-37	0.741821	0.038	0.023	1.34952e-32
STIM2	7.63991e-37	0.562826	0.059	0.04	1.38168e-32
USP16	8.38938e-37	0.595492	0.063	0.043	1.51722e-32
PKN2	8.51941e-37	0.381444	0.106	0.08	1.54074e-32
IFT46	8.63299e-37	0.730443	0.043	0.027	1.56128e-32
PNMA1	9.123e-37	0.17755	0.395	0.347	1.64989e-32
ADA2	1.05472e-36	0.995845	0.021	0.01	1.90746e-32
MAGEH1	1.08964e-36	0.167164	0.253	0.211	1.97062e-32
BTG1	1.25944e-36	0.175609	0.461	0.414	2.2777e-32
ATP11A	1.30582e-36	0.569429	0.056	0.038	2.36157e-32
HSBP1	1.41986e-36	0.323526	0.126	0.098	2.56782e-32
TSNAX	1.45691e-36	0.366988	0.103	0.078	2.63482e-32
KDM5B	1.46302e-36	0.193025	0.344	0.298	2.64588e-32
TMEM132E	1.82358e-36	0.757836	0.029	0.016	3.29795e-32
IDS	2.05553e-36	0.271463	0.168	0.135	3.71742e-32
AHCY	2.27221e-36	0.397223	0.107	0.082	4.1093e-32
MAP7D1	2.93993e-36	-0.289547	0.283	0.31	5.31687e-32
DBNDD1	2.94295e-36	-0.555701	0.075	0.098	5.32232e-32
NOVA1	3.04391e-36	-0.391558	0.182	0.21	5.50492e-32
ZNF581	3.41888e-36	0.65067	0.044	0.028	6.18305e-32
PID1	3.76649e-36	-0.334831	0.161	0.19	6.8117e-32
HDGFL2	3.99723e-36	0.381829	0.088	0.065	7.22899e-32
HMCES	4.01206e-36	0.414981	0.077	0.056	7.25581e-32
THADA	5.16434e-36	0.607807	0.051	0.034	9.3397e-32
HNRNPD	5.65426e-36	-0.133607	0.552	0.575	1.02257e-31
GPRIN1	6.04613e-36	0.284463	0.162	0.131	1.09344e-31
FBXO32	6.12114e-36	0.652713	0.042	0.027	1.10701e-31
HOMER1	6.82378e-36	0.475262	0.058	0.039	1.23408e-31
FH	7.2114e-36	0.455268	0.076	0.054	1.30418e-31
ELN	7.21158e-36	-0.654544	0.043	0.062	1.30421e-31
C1orf56	8.08247e-36	1.14208	0.016	0.007	1.46171e-31
YWHAB	8.22106e-36	-0.530731	0.068	0.089	1.48678e-31
LARP1	8.48166e-36	0.545761	0.055	0.037	1.53391e-31
CDH22	8.91436e-36	1.04022	0.018	0.008	1.61216e-31
KCNB1	9.68765e-36	0.616756	0.033	0.019	1.75201e-31
SLC1A3	9.69212e-36	0.218741	0.442	0.403	1.75282e-31
CDK17	1.0221e-35	0.253337	0.168	0.135	1.84847e-31
WDR86	1.09766e-35	0.33023	0.087	0.064	1.98511e-31
PEX6	1.16542e-35	0.722084	0.044	0.028	2.10766e-31
OTX1	1.18768e-35	0.592425	0.049	0.032	2.14792e-31
PLEKHF2	1.19453e-35	0.672249	0.04	0.025	2.16031e-31
FNDC4	1.24574e-35	0.956159	0.024	0.012	2.25291e-31
TMEM145	1.32611e-35	0.404374	0.098	0.074	2.39827e-31
ZNF451	1.35096e-35	0.702693	0.041	0.025	2.4432e-31
CDH23	1.41836e-35	0.420955	0.074	0.053	2.5651e-31
FBXW4	1.42877e-35	0.816824	0.024	0.012	2.58392e-31
PHF12	1.61504e-35	0.315715	0.131	0.103	2.9208e-31
PGRMC2	2.00871e-35	0.28657	0.162	0.131	3.63276e-31
AUH	2.17007e-35	0.594146	0.043	0.027	3.92457e-31
ZDBF2	2.2787e-35	0.466465	0.06	0.041	4.12103e-31
PLAG1	2.36862e-35	0.709158	0.033	0.019	4.28365e-31
DHX9	2.53018e-35	-0.176016	0.483	0.504	4.57582e-31
SDE2	2.62448e-35	0.561307	0.055	0.037	4.74637e-31
VPS26B	2.63334e-35	0.228816	0.231	0.194	4.7624e-31
MUC20	2.77408e-35	0.70051	0.031	0.018	5.01692e-31
POLE3	3.12604e-35	0.378944	0.103	0.079	5.65343e-31
HTRA2	3.20975e-35	0.745698	0.038	0.023	5.80483e-31
FBXL2	3.24286e-35	0.840841	0.029	0.016	5.8647e-31
USP33	3.55415e-35	0.228351	0.219	0.182	6.42768e-31
DDX17	3.68022e-35	-0.267882	0.276	0.303	6.65567e-31
KEAP1	4.74321e-35	0.353077	0.114	0.088	8.5781e-31
ARL5B	4.89959e-35	0.263487	0.145	0.115	8.86092e-31
ISOC1	4.97074e-35	0.664124	0.039	0.024	8.98959e-31
PCDHGA3	5.71319e-35	-1.01783	0.016	0.027	1.03323e-30
PNRC1	6.59172e-35	-0.19133	0.419	0.444	1.19211e-30
TMEM132B	6.59372e-35	1.28917	0.013	0.005	1.19248e-30
ZNF229	6.68518e-35	-0.678304	0.029	0.044	1.20902e-30
GNG2	6.90703e-35	0.181412	0.329	0.285	1.24914e-30
TTC33	7.47971e-35	0.429985	0.064	0.045	1.3527e-30
KLF9	8.19993e-35	0.698636	0.037	0.023	1.48296e-30
ROBO1	8.70601e-35	-0.221823	0.336	0.365	1.57448e-30
MMD	8.7826e-35	0.231176	0.176	0.143	1.58833e-30
ANKRD10	1.01753e-34	-0.213458	0.409	0.432	1.8402e-30
SRPRA	1.16917e-34	0.47933	0.077	0.056	2.11444e-30
FBXL19	1.31104e-34	0.297471	0.112	0.086	2.37101e-30
MMP24	1.54643e-34	0.24104	0.114	0.088	2.79671e-30
GFRA1	1.56112e-34	-1.10341	0.019	0.032	2.82328e-30
GUCY1A2	1.73208e-34	0.509737	0.048	0.032	3.13247e-30
TMEM87B	1.76701e-34	0.504649	0.059	0.04	3.19564e-30
USO1	1.77185e-34	0.353128	0.129	0.102	3.2044e-30
PCDHB16	1.83327e-34	0.276136	0.107	0.082	3.31547e-30
TRAP1	1.85294e-34	0.235163	0.225	0.188	3.35104e-30
MIS18BP1	1.92014e-34	-0.486372	0.111	0.135	3.47258e-30
WASF1	2.69845e-34	0.189546	0.217	0.18	4.88014e-30
ZNF595	2.70432e-34	0.453027	0.079	0.058	4.89076e-30
ZDHHC6	2.79421e-34	0.436329	0.081	0.06	5.05333e-30
THNSL2	2.98979e-34	0.967959	0.016	0.007	5.40703e-30
ARSD	3.4575e-34	0.692809	0.025	0.013	6.25289e-30
PEX13	3.72486e-34	0.274094	0.164	0.133	6.7364e-30
HIPK2	3.79458e-34	0.160614	0.388	0.341	6.8625e-30
SFPQ	3.96629e-34	-0.208517	0.408	0.43	7.17303e-30
STMN4	4.1205e-34	0.223326	0.355	0.312	7.45192e-30
GSTCD	4.25589e-34	0.700216	0.036	0.022	7.69677e-30
NUDC	4.65514e-34	0.228523	0.266	0.227	8.41882e-30
ZMAT2	4.84371e-34	0.274274	0.173	0.142	8.75985e-30
SLIT1	4.92588e-34	-0.619587	0.049	0.068	8.90846e-30
KMT2B	4.98586e-34	0.313555	0.133	0.105	9.01693e-30
IKBKB	5.30214e-34	0.441939	0.087	0.065	9.58892e-30
YEATS2	5.60127e-34	0.301038	0.132	0.104	1.01299e-29
RASA2	8.20414e-34	0.422098	0.077	0.056	1.48372e-29
IMMP2L	8.58755e-34	0.690735	0.034	0.02	1.55306e-29
PPP2R2A	9.30291e-34	0.231978	0.191	0.157	1.68243e-29
TMEM30A	9.3178e-34	0.599668	0.039	0.024	1.68512e-29
RUSC2	1.12329e-33	0.293224	0.118	0.092	2.03148e-29
AASS	1.28197e-33	-0.387799	0.145	0.171	2.31843e-29
MAP6	1.40635e-33	-0.290288	0.226	0.254	2.54339e-29
STMP1	1.5854e-33	0.198073	0.308	0.265	2.8672e-29
IVD	1.59357e-33	0.582473	0.05	0.033	2.88197e-29
NDC80	1.69298e-33	-0.394257	0.125	0.15	3.06175e-29
PRPS1	1.69515e-33	0.243449	0.177	0.145	3.06567e-29
CCNA2	1.98146e-33	-0.286295	0.239	0.267	3.58347e-29
NF2	2.19671e-33	0.274841	0.166	0.135	3.97275e-29
RALGPS1	2.40475e-33	0.385013	0.094	0.071	4.34898e-29
SART3	2.6083e-33	0.401441	0.097	0.074	4.71711e-29
HMGXB4	2.64155e-33	0.352115	0.102	0.078	4.77724e-29
NFIX	3.07814e-33	0.418599	0.043	0.028	5.56681e-29
RAC3	3.56673e-33	0.300034	0.126	0.099	6.45043e-29
IGSF21	3.77012e-33	0.889434	0.022	0.011	6.81826e-29
CBFA2T3	3.80925e-33	0.364894	0.07	0.05	6.88902e-29
COMMD4	4.62691e-33	-0.424976	0.13	0.154	8.36776e-29
CKS1B	4.80089e-33	-0.306808	0.213	0.24	8.68241e-29
CDK5R1	5.01878e-33	0.147093	0.46	0.415	9.07646e-29
CNGA3	5.1736e-33	0.602794	0.043	0.028	9.35645e-29
ATP6V1H	5.51893e-33	0.450203	0.071	0.052	9.98099e-29
NKAIN4	5.51916e-33	0.237142	0.177	0.145	9.9814e-29
SHROOM2	7.8887e-33	0.340582	0.088	0.066	1.42667e-28
KCNH7	8.01973e-33	0.360587	0.141	0.113	1.45037e-28
ANGPTL1	8.08941e-33	0.606364	0.039	0.025	1.46297e-28
HAT1	8.1544e-33	-0.266126	0.227	0.255	1.47472e-28
CDC123	8.55298e-33	0.370713	0.113	0.088	1.54681e-28
LSS	8.8891e-33	-0.220705	0.316	0.342	1.60759e-28
CCND2	8.97514e-33	0.172116	0.656	0.622	1.62315e-28
HUNK	9.65203e-33	0.64877	0.05	0.034	1.74557e-28
RRAS2	9.73253e-33	0.516165	0.045	0.029	1.76013e-28
MXRA8	9.9529e-33	-1.16953	0.007	0.015	1.79998e-28
PIK3CA	1.14513e-32	0.31181	0.092	0.069	2.07097e-28
PIGN	1.16137e-32	0.664347	0.04	0.025	2.10034e-28
VPS8	1.19374e-32	0.426486	0.081	0.06	2.15887e-28
ITGA6	1.26694e-32	0.491822	0.064	0.046	2.29126e-28
GPM6A	1.32036e-32	0.179926	0.411	0.365	2.38787e-28
VTA1	1.35424e-32	0.349734	0.107	0.083	2.44915e-28
B2M	1.85523e-32	-0.606496	0.062	0.081	3.35519e-28
ATXN7L3B	2.07934e-32	0.138453	0.439	0.391	3.76048e-28
CAMK2D	2.17241e-32	0.34215	0.123	0.097	3.92881e-28
SIAH2	2.22634e-32	0.298244	0.105	0.081	4.02634e-28
RBM8A	2.69219e-32	-0.372222	0.1	0.124	4.86882e-28
CXXC4	3.05089e-32	0.189675	0.158	0.127	5.51753e-28
CALM3	3.36674e-32	0.156939	0.449	0.403	6.08875e-28
YIPF3	3.47512e-32	0.216184	0.233	0.197	6.28475e-28
BRD3OS	3.52352e-32	0.26279	0.15	0.121	6.37229e-28
SLC25A16	3.82807e-32	0.290838	0.134	0.107	6.92306e-28
ADAMTS2	4.15177e-32	0.732385	0.027	0.015	7.50847e-28
TMED5	4.39226e-32	0.572654	0.062	0.044	7.94341e-28
HSD17B4	4.64846e-32	0.394846	0.091	0.069	8.40674e-28
PAF1	4.65615e-32	0.350948	0.096	0.073	8.42064e-28
SLC35F5	5.90441e-32	0.271734	0.164	0.134	1.06781e-27
LIMD1	6.43486e-32	-0.360691	0.14	0.165	1.16374e-27
STAM	6.61481e-32	0.348747	0.094	0.072	1.19629e-27
PHGDH	6.86785e-32	0.215873	0.432	0.391	1.24205e-27
PRPF38B	7.75325e-32	0.394235	0.095	0.072	1.40217e-27
SRRM4	9.06312e-32	0.245728	0.123	0.097	1.63907e-27
MYBL2	9.99461e-32	-0.288475	0.221	0.248	1.80752e-27
PPA2	1.01117e-31	0.330893	0.089	0.067	1.8287e-27
GRM4	1.07879e-31	1.18486	0.015	0.006	1.95099e-27
EIF4A2	1.09239e-31	0.224912	0.232	0.196	1.97558e-27
ITPRID2	1.09514e-31	0.597218	0.048	0.032	1.98056e-27
TLCD5	1.13238e-31	0.924221	0.024	0.013	2.0479e-27
PLEKHM2	1.15621e-31	0.366495	0.104	0.08	2.091e-27
MRNIP	1.42491e-31	0.202937	0.206	0.171	2.57695e-27
USF3	1.43596e-31	0.627635	0.035	0.022	2.59693e-27
JADE3	1.47817e-31	0.567983	0.049	0.033	2.67327e-27
STS	1.70803e-31	0.860013	0.018	0.009	3.08898e-27
CENPF	2.29415e-31	-0.318693	0.191	0.217	4.14898e-27
KPNA1	2.35089e-31	0.207579	0.264	0.225	4.25158e-27
TCIM	2.42728e-31	0.34145	0.138	0.111	4.38974e-27
TIMM22	2.44267e-31	0.612617	0.048	0.033	4.41757e-27
KIAA1211	2.51287e-31	0.308949	0.129	0.103	4.54453e-27
GPCPD1	2.61239e-31	0.192724	0.202	0.168	4.7245e-27
KLHL7	2.66902e-31	0.183395	0.252	0.214	4.82692e-27
F8A1	2.74975e-31	-0.825095	0.02	0.032	4.97293e-27
PFDN2	3.49514e-31	0.196	0.266	0.228	6.32097e-27
FZD3	3.49814e-31	-0.230383	0.337	0.361	6.32638e-27
CADM3	3.57097e-31	0.166598	0.221	0.185	6.4581e-27
PCCA	3.62689e-31	0.230434	0.128	0.102	6.55924e-27
SAT2	3.73245e-31	0.260935	0.206	0.173	6.75014e-27
IQCB1	4.23589e-31	0.43456	0.071	0.052	7.6606e-27
TUT7	4.32695e-31	0.283405	0.161	0.132	7.82529e-27
GINS1	4.9258e-31	-0.475229	0.087	0.108	8.9083e-27
GPR27	5.06787e-31	0.30563	0.095	0.072	9.16524e-27
SPECC1	5.60781e-31	0.24367	0.246	0.21	1.01417e-26
EPHA6	5.7257e-31	0.761113	0.022	0.012	1.03549e-26
MOB1A	6.60487e-31	0.739055	0.037	0.024	1.19449e-26
PIEZO2	6.86455e-31	0.714371	0.025	0.014	1.24145e-26
TEAD2	6.97229e-31	-0.287472	0.186	0.212	1.26094e-26
HSCB	7.42584e-31	0.978719	0.02	0.01	1.34296e-26
UBB	8.57363e-31	-0.173114	0.493	0.51	1.55054e-26
NINL	8.61377e-31	0.384662	0.088	0.066	1.5578e-26
BRINP2	1.08928e-30	0.170932	0.128	0.101	1.96996e-26
BRD3	1.09208e-30	0.201471	0.229	0.194	1.97503e-26
CCDC184	1.24102e-30	0.338874	0.074	0.054	2.24439e-26
SEPHS1	1.2727e-30	-0.292444	0.28	0.304	2.30168e-26
UBA52	1.43567e-30	0.149338	0.554	0.508	2.59642e-26
KCMF1	1.60319e-30	0.298709	0.132	0.106	2.89937e-26
ST6GALNAC3	1.61245e-30	1.02797	0.018	0.009	2.91611e-26
SLC39A6	1.69584e-30	0.194518	0.282	0.243	3.06693e-26
SCRT1	1.746e-30	0.248119	0.124	0.098	3.15764e-26
AIMP1	1.96394e-30	0.310539	0.105	0.081	3.55179e-26
ARL5A	2.08855e-30	0.759291	0.032	0.019	3.77715e-26
ILVBL	2.14564e-30	0.385377	0.072	0.053	3.88039e-26
TRMT1L	2.15049e-30	0.441681	0.059	0.042	3.88917e-26
KDM5C	2.60329e-30	0.283799	0.171	0.141	4.70805e-26
ZFP28	2.67249e-30	-0.57661	0.049	0.066	4.8332e-26
BAP1	2.72189e-30	0.263472	0.127	0.101	4.92254e-26
MTF2	2.78994e-30	0.220242	0.164	0.135	5.04561e-26
TRIM36	2.84386e-30	0.217555	0.2	0.167	5.14312e-26
LRP4	3.04763e-30	0.519177	0.069	0.05	5.51164e-26
CELF4	3.17184e-30	0.203484	0.087	0.065	5.73627e-26
PCGF2	3.2151e-30	0.183417	0.275	0.236	5.81452e-26
TMEM108	3.21792e-30	0.788353	0.027	0.016	5.81961e-26
HNRNPF	3.33341e-30	0.179246	0.309	0.268	6.02847e-26
TMEM170A	3.41156e-30	0.734427	0.038	0.024	6.1698e-26
ORMDL3	3.6645e-30	0.219579	0.185	0.153	6.62725e-26
MIF	3.94748e-30	-0.213276	0.433	0.453	7.13902e-26
IDH1	4.33101e-30	0.246301	0.144	0.116	7.83263e-26
SLC1A6	4.59167e-30	0.345828	0.061	0.043	8.30404e-26
ITGA7	4.70513e-30	0.949371	0.02	0.011	8.50922e-26
KLHL2	4.90619e-30	0.422275	0.07	0.051	8.87285e-26
PSME4	5.04089e-30	0.351626	0.094	0.072	9.11645e-26
DLGAP1	5.51009e-30	0.362476	0.082	0.062	9.965e-26
ATE1	5.61596e-30	0.40655	0.091	0.07	1.01565e-25
COL2A1	5.68258e-30	0.250578	0.088	0.067	1.02769e-25
JUND	6.60473e-30	0.159578	0.506	0.464	1.19447e-25
OSBPL6	7.31612e-30	1.16181	0.014	0.006	1.32312e-25
ACADM	7.62535e-30	0.312045	0.121	0.096	1.37904e-25
HSD17B14	7.6343e-30	-0.764381	0.021	0.034	1.38066e-25
TLK1	9.3629e-30	0.291204	0.116	0.092	1.69328e-25
DPCD	1.06503e-29	-0.437614	0.101	0.123	1.9261e-25
JAK1	1.06669e-29	0.573306	0.047	0.032	1.92911e-25
QSER1	1.08284e-29	0.150566	0.326	0.283	1.95831e-25
FAM171A2	1.18375e-29	0.15283	0.345	0.302	2.14081e-25
KANSL2	1.25548e-29	0.477477	0.067	0.048	2.27053e-25
GPC1	1.36149e-29	-0.162628	0.517	0.533	2.46226e-25
EIF4EBP2	1.4107e-29	-0.155254	0.48	0.5	2.55125e-25
HS6ST1	1.49087e-29	0.304892	0.106	0.083	2.69624e-25
TMEM47	1.65185e-29	0.291316	0.12	0.095	2.98736e-25
UCKL1	1.65956e-29	0.368967	0.095	0.073	3.00132e-25
BCKDHA	1.73237e-29	0.290369	0.097	0.075	3.13299e-25
SELENBP1	1.85318e-29	-0.534711	0.055	0.073	3.35147e-25
HSPBP1	1.87524e-29	0.500394	0.054	0.037	3.39137e-25
SORBS2	2.03176e-29	0.274407	0.114	0.09	3.67443e-25
NETO2	2.58531e-29	0.225442	0.163	0.134	4.67553e-25
IARS2	2.63195e-29	0.327188	0.101	0.078	4.75989e-25
ATP5PD	2.76508e-29	0.289913	0.152	0.125	5.00064e-25
KIAA1586	3.08266e-29	0.227267	0.15	0.122	5.57499e-25
DCC	3.08312e-29	-0.587919	0.054	0.072	5.57582e-25
ITFG2	3.20647e-29	0.663017	0.035	0.022	5.79891e-25
ZFP30	3.37019e-29	0.274001	0.126	0.101	6.09499e-25
STON1	3.53311e-29	0.372644	0.067	0.049	6.38963e-25
PKDCC	3.88322e-29	0.608368	0.036	0.023	7.02281e-25
SQSTM1	3.94322e-29	-0.326095	0.194	0.219	7.1313e-25
FAM122A	3.98143e-29	0.448942	0.054	0.038	7.20041e-25
BCAS4	4.28783e-29	0.48211	0.059	0.042	7.75453e-25
G3BP2	6.24359e-29	-0.2467	0.285	0.309	1.12915e-24
KMT5B	6.31225e-29	0.18672	0.262	0.225	1.14157e-24
TMEM135	6.33909e-29	0.756076	0.026	0.015	1.14643e-24
TMF1	6.95669e-29	0.243219	0.154	0.126	1.25812e-24
KDM7A	7.10055e-29	0.524302	0.046	0.031	1.28413e-24
GNAL	7.10791e-29	0.342437	0.055	0.038	1.28547e-24
PMEPA1	7.1838e-29	0.283166	0.095	0.073	1.29919e-24
PSMC3	8.79819e-29	-0.252149	0.261	0.285	1.59115e-24
NQO1	9.62645e-29	-0.979037	0.009	0.017	1.74094e-24
USP3	9.6987e-29	0.142533	0.225	0.19	1.75401e-24
CHD9	1.10018e-28	-0.266073	0.212	0.237	1.98967e-24
FRMPD3	1.11621e-28	0.75819	0.026	0.015	2.01867e-24
VCPIP1	1.25004e-28	0.419033	0.082	0.063	2.26069e-24
POLR2B	1.48471e-28	0.215486	0.231	0.197	2.6851e-24
NDUFA4L2	1.51345e-28	-0.827362	0.017	0.028	2.73708e-24
HIRA	1.5286e-28	0.362632	0.092	0.071	2.76447e-24
NDUFV3	1.86574e-28	0.213419	0.169	0.14	3.37419e-24
ZNF714	1.8803e-28	0.258024	0.094	0.072	3.40052e-24
RB1CC1	1.947e-28	0.242495	0.166	0.137	3.52115e-24
SERINC3	1.94702e-28	0.232113	0.148	0.12	3.52118e-24
PDHX	2.10057e-28	0.263321	0.115	0.091	3.79889e-24
CD151	2.14176e-28	-0.334613	0.19	0.213	3.87337e-24
ST8SIA3	2.22388e-28	-0.768727	0.023	0.036	4.02189e-24
NTM	2.31416e-28	0.457603	0.047	0.032	4.18515e-24
OAF	2.4133e-28	0.659768	0.031	0.019	4.36446e-24
VOPP1	2.44905e-28	0.244085	0.161	0.133	4.42911e-24
ELMO1	2.50695e-28	0.281473	0.074	0.055	4.53382e-24
STAT5B	2.55143e-28	0.245977	0.136	0.11	4.61425e-24
METTL16	2.90643e-28	0.450255	0.064	0.047	5.25627e-24
TNFRSF10B	2.93007e-28	0.251217	0.159	0.132	5.29903e-24
ESPL1	2.9891e-28	-0.459918	0.108	0.129	5.4058e-24
ANKRD6	3.14795e-28	-0.497212	0.085	0.105	5.69307e-24
IGDCC4	3.36497e-28	0.376399	0.069	0.051	6.08555e-24
CIT	3.66018e-28	-0.376481	0.124	0.146	6.61943e-24
SEMA6C	3.77274e-28	0.184849	0.207	0.174	6.823e-24
TCEAL8	4.08272e-28	0.217796	0.184	0.154	7.3836e-24
TUB	4.26794e-28	0.30141	0.107	0.085	7.71856e-24
FOXM1	4.29711e-28	-0.4472	0.104	0.125	7.77133e-24
NCOA2	4.32365e-28	0.349589	0.071	0.053	7.81932e-24
DOCK1	4.62978e-28	-0.42846	0.095	0.116	8.37296e-24
ZNF667	4.64036e-28	-0.643865	0.027	0.04	8.39209e-24
CEP68	4.79938e-28	0.280705	0.104	0.082	8.67968e-24
CAMSAP3	5.13816e-28	0.224953	0.117	0.093	9.29236e-24
BBC3	5.47889e-28	0.349821	0.102	0.08	9.90857e-24
GET1	5.78618e-28	-0.256667	0.25	0.275	1.04643e-23
TTLL7	5.97286e-28	0.327125	0.084	0.064	1.08019e-23
ADAMTS13	6.45801e-28	0.259113	0.078	0.059	1.16793e-23
TBC1D1	6.67573e-28	0.473299	0.052	0.037	1.20731e-23
PTPRM	6.99138e-28	0.408113	0.069	0.051	1.26439e-23
FAM162A	7.61162e-28	-0.406862	0.188	0.211	1.37656e-23
KIAA1328	7.62671e-28	0.443782	0.06	0.043	1.37929e-23
PPM1E	8.1181e-28	0.290292	0.108	0.085	1.46816e-23
SPTLC2	8.14934e-28	0.585936	0.039	0.025	1.47381e-23
UNC5D	9.96179e-28	-1.38836	0.006	0.013	1.80159e-23
UFM1	1.08964e-27	0.189228	0.21	0.177	1.97061e-23
GPX3	1.09238e-27	-0.864328	0.018	0.028	1.97557e-23
FER	1.12147e-27	0.359163	0.086	0.066	2.02817e-23
SLC19A2	1.14832e-27	0.47662	0.055	0.039	2.07674e-23
NMNAT2	1.2308e-27	0.153578	0.158	0.129	2.2259e-23
C6orf120	1.24535e-27	0.331155	0.093	0.072	2.25222e-23
ZNF337	1.2846e-27	0.229125	0.159	0.131	2.3232e-23
BUB1	1.28932e-27	-0.359117	0.141	0.164	2.33174e-23
AURKB	1.42025e-27	-0.327741	0.187	0.211	2.56851e-23
SOS2	1.42234e-27	0.348408	0.11	0.087	2.5723e-23
DYNC1I2	1.45691e-27	-0.158079	0.485	0.504	2.63482e-23
ZBTB46	1.6502e-27	0.407107	0.056	0.04	2.98438e-23
DDB2	1.73077e-27	0.427378	0.051	0.035	3.13011e-23
DBP	1.78746e-27	0.249389	0.116	0.092	3.23263e-23
FBXL5	1.81218e-27	0.308379	0.105	0.082	3.27733e-23
GAD1	1.91478e-27	-0.262111	0.246	0.271	3.46287e-23
PRPF4	2.00954e-27	0.409927	0.072	0.054	3.63425e-23
XRRA1	2.03688e-27	0.510308	0.043	0.029	3.68369e-23
RPAP2	2.18392e-27	0.324516	0.083	0.063	3.94962e-23
MED28	2.28076e-27	0.203759	0.198	0.167	4.12476e-23
VPS53	2.46491e-27	0.249134	0.156	0.129	4.45779e-23
URGCP	2.51707e-27	0.541582	0.052	0.037	4.55212e-23
GFM2	2.85982e-27	0.29013	0.115	0.091	5.17198e-23
SRPK1	2.92711e-27	0.265384	0.142	0.116	5.29368e-23
HEATR6	2.98727e-27	0.5622	0.037	0.025	5.40247e-23
KRIT1	3.13895e-27	0.391488	0.071	0.053	5.67679e-23
PLEC	3.37033e-27	0.764705	0.029	0.018	6.09524e-23
GPS1	3.39486e-27	0.199035	0.213	0.181	6.1396e-23
IQGAP3	4.01734e-27	0.774055	0.031	0.019	7.26536e-23
HYAL2	4.50753e-27	0.339302	0.093	0.073	8.15187e-23
SS18L2	4.67366e-27	0.42958	0.068	0.051	8.45231e-23
ELAVL2	4.6881e-27	0.157766	0.196	0.165	8.47843e-23
JAG1	4.73459e-27	0.577474	0.041	0.028	8.5625e-23
RRM2	4.84689e-27	-0.352475	0.112	0.134	8.7656e-23
ACACA	5.06039e-27	0.263909	0.144	0.119	9.15172e-23
PEA15	5.3709e-27	0.134178	0.666	0.635	9.71327e-23
PCDHGB6	5.37734e-27	-0.264453	0.23	0.254	9.72492e-23
SRSF8	5.49724e-27	0.336383	0.091	0.07	9.94177e-23
FBXO7	6.06969e-27	0.272355	0.109	0.087	1.0977e-22
TKT	6.24461e-27	0.335305	0.102	0.08	1.12934e-22
DCXR	6.65943e-27	-0.308778	0.194	0.217	1.20436e-22
HDAC8	6.82104e-27	0.715572	0.028	0.017	1.23359e-22
MORF4L1	7.23701e-27	-0.212792	0.303	0.325	1.30881e-22
CXCL14	7.5133e-27	-0.934591	0.014	0.023	1.35878e-22
GPI	7.64454e-27	-0.370553	0.173	0.196	1.38252e-22
ZBED5	8.06276e-27	0.237585	0.143	0.117	1.45815e-22
DLX1	8.46284e-27	-0.149117	0.508	0.524	1.5305e-22
DYNC1I1	8.5537e-27	0.355493	0.046	0.031	1.54694e-22
C11orf96	9.75839e-27	0.139407	0.289	0.251	1.76481e-22
MFAP2	9.98081e-27	-0.490302	0.084	0.104	1.80503e-22
RFTN2	1.00178e-26	0.324458	0.094	0.074	1.81173e-22
IWS1	1.03746e-26	0.256558	0.135	0.11	1.87625e-22
DUT	1.05594e-26	-0.340055	0.198	0.22	1.90967e-22
PARP16	1.0644e-26	0.567039	0.04	0.027	1.92497e-22
HPS4	1.069e-26	0.316764	0.094	0.073	1.93329e-22
ATAD2	1.08076e-26	0.361795	0.085	0.066	1.95455e-22
HPCA	1.12661e-26	0.715348	0.028	0.017	2.03748e-22
CRTAC1	1.15999e-26	1.09589	0.013	0.006	2.09784e-22
PIF1	1.20453e-26	-0.650976	0.051	0.067	2.17839e-22
KLF7	1.2423e-26	0.190678	0.151	0.124	2.2467e-22
MTFP1	1.2688e-26	0.290763	0.05	0.035	2.29463e-22
CCDC28B	1.27418e-26	0.327313	0.1	0.078	2.30435e-22
SLAIN2	1.43239e-26	0.178115	0.223	0.19	2.59047e-22
ARRDC4	1.86419e-26	0.243791	0.143	0.117	3.37138e-22
SLC44A1	1.97323e-26	-0.296242	0.137	0.16	3.56858e-22
PTPRU	2.10444e-26	0.548304	0.032	0.02	3.80588e-22
PLP1	2.105e-26	0.973173	0.014	0.006	3.80689e-22
TRPM4	2.15103e-26	0.491822	0.039	0.026	3.89014e-22
USF2	2.24958e-26	0.172967	0.292	0.254	4.06837e-22
SEMA7A	2.44233e-26	0.384147	0.05	0.035	4.41696e-22
AGTPBP1	2.54004e-26	0.146345	0.301	0.263	4.59366e-22
GJC1	2.6473e-26	-0.372075	0.113	0.134	4.78765e-22
ATCAY	2.84882e-26	0.143371	0.266	0.229	5.15208e-22
PLA2G6	2.931e-26	0.583869	0.037	0.024	5.30071e-22
HILPDA	3.26462e-26	0.209576	0.11	0.087	5.90407e-22
NCOA6	3.33247e-26	0.267102	0.133	0.109	6.02677e-22
CDCA3	3.44641e-26	-0.370167	0.11	0.131	6.23283e-22
GNB1	3.62566e-26	-0.15555	0.487	0.503	6.557e-22
FAM218A	3.63556e-26	0.707355	0.022	0.013	6.5749e-22
ZNF521	3.909e-26	-0.488599	0.093	0.112	7.06942e-22
DCTN1	4.21537e-26	-0.222644	0.333	0.354	7.6235e-22
TXNRD1	4.24659e-26	-0.264649	0.217	0.24	7.67996e-22
F11R	4.33263e-26	0.865005	0.014	0.007	7.83556e-22
DLX2	4.72669e-26	-0.118055	0.692	0.713	8.54823e-22
GRHPR	5.23182e-26	0.31608	0.126	0.102	9.46175e-22
SPIN3	5.32347e-26	0.403217	0.055	0.04	9.62749e-22
ITPA	5.71388e-26	0.336555	0.087	0.068	1.03335e-21
POLI	5.75489e-26	0.192745	0.168	0.14	1.04077e-21
MEF2A	6.31456e-26	0.318967	0.097	0.077	1.14199e-21
HMGB3	6.46291e-26	0.230707	0.16	0.133	1.16882e-21
ZNF503	6.97709e-26	-0.842657	0.026	0.038	1.26181e-21
RSRP1	7.20228e-26	0.278337	0.131	0.107	1.30253e-21
IL18BP	7.26273e-26	0.579106	0.036	0.024	1.31346e-21
SUCO	7.28577e-26	0.212713	0.125	0.101	1.31763e-21
CALM2	8.5772e-26	0.126634	0.335	0.294	1.55119e-21
DDTL	9.59127e-26	1.22318	0.016	0.008	1.73458e-21
RGS8	9.94993e-26	0.213912	0.075	0.056	1.79945e-21
VMAC	9.99714e-26	0.764565	0.023	0.014	1.80798e-21
GALT	1.00741e-25	0.222846	0.145	0.12	1.82191e-21
KATNBL1	1.01233e-25	0.779772	0.023	0.013	1.8308e-21
UTP3	1.01892e-25	0.629011	0.039	0.027	1.84271e-21
POLG2	1.02681e-25	0.575771	0.039	0.026	1.85698e-21
SCRN1	1.0784e-25	0.147012	0.331	0.293	1.95028e-21
HOMER2	1.0915e-25	0.70559	0.028	0.017	1.97398e-21
HIC2	1.16987e-25	0.306005	0.082	0.063	2.11571e-21
PREX1	1.24167e-25	0.256625	0.124	0.1	2.24556e-21
CEMIP2	1.3093e-25	0.222578	0.135	0.111	2.36788e-21
PPP1CA	1.42686e-25	-0.302273	0.187	0.209	2.58048e-21
RSBN1L	1.42928e-25	0.330246	0.092	0.072	2.58485e-21
JPH3	1.45285e-25	0.348468	0.068	0.051	2.62749e-21
CLIC4	1.49056e-25	-0.14692	0.412	0.434	2.69567e-21
COL6A1	1.57041e-25	0.201821	0.238	0.206	2.84008e-21
ESYT1	1.72509e-25	-0.406904	0.1	0.12	3.11983e-21
ORC6	1.85679e-25	-0.387416	0.118	0.139	3.358e-21
TNK2	2.13431e-25	0.175843	0.176	0.147	3.8599e-21
CHRM1	2.14073e-25	0.496369	0.031	0.019	3.87151e-21
ATP5MC1	2.22733e-25	0.30225	0.097	0.076	4.02813e-21
NRGN	2.30014e-25	0.330861	0.069	0.052	4.1598e-21
PCP4	2.4145e-25	-1.1722	0.012	0.021	4.36662e-21
MTLN	2.41907e-25	-0.383417	0.071	0.089	4.3749e-21
PLA2G4B	2.52569e-25	0.609057	0.039	0.026	4.5677e-21
ZNF652	2.5381e-25	0.3636	0.073	0.056	4.59016e-21
GLRA2	2.637e-25	0.280644	0.057	0.041	4.76902e-21
B4GAT1	2.83982e-25	0.428281	0.074	0.057	5.13582e-21
GNB2	2.87356e-25	0.146757	0.42	0.379	5.19683e-21
SLC41A3	2.92929e-25	0.453669	0.06	0.044	5.29763e-21
CXorf56	3.13299e-25	-0.472853	0.062	0.079	5.66601e-21
SFRP2	3.1766e-25	0.270455	0.135	0.111	5.74489e-21
SCAF1	3.24475e-25	0.204996	0.18	0.152	5.86813e-21
PELP1	3.36118e-25	0.22771	0.163	0.137	6.07869e-21
CDK3	3.39835e-25	-0.547479	0.026	0.038	6.14591e-21
GASK1B	3.46969e-25	-1.19347	0.007	0.014	6.27494e-21
STIMATE	3.49851e-25	0.538132	0.049	0.035	6.32706e-21
DLX6	3.5004e-25	-0.439996	0.111	0.131	6.33048e-21
SF1	3.70227e-25	-0.274213	0.178	0.201	6.69555e-21
PHF21A	4.124e-25	0.189715	0.158	0.132	7.45825e-21
QRICH1	4.14315e-25	0.216046	0.16	0.134	7.49288e-21
SPATA13	4.24141e-25	0.310084	0.08	0.062	7.67059e-21
CACNA1I	4.24901e-25	0.886759	0.016	0.008	7.68433e-21
GADD45GIP1	4.26642e-25	0.21575	0.168	0.141	7.71581e-21
PRRT4	4.63015e-25	0.337253	0.045	0.031	8.37362e-21
FSD1	5.41478e-25	-0.4546	0.086	0.105	9.79263e-21
MSI2	5.8262e-25	-0.135374	0.515	0.534	1.05367e-20
SOX21	6.16905e-25	-0.255582	0.136	0.158	1.11567e-20
MXD3	6.70908e-25	-0.351873	0.146	0.168	1.21334e-20
KIAA1109	6.74093e-25	0.271927	0.095	0.075	1.2191e-20
HECA	7.80217e-25	0.482481	0.043	0.03	1.41102e-20
CD276	7.8402e-25	-0.241391	0.29	0.31	1.4179e-20
ARHGAP11A	7.90225e-25	-0.400784	0.141	0.162	1.42912e-20
SCAMP1	8.27462e-25	0.166258	0.209	0.178	1.49646e-20
FGF19	8.99122e-25	-1.78955	0.004	0.01	1.62606e-20
BACH1	9.50475e-25	0.168441	0.299	0.262	1.71893e-20
CLHC1	9.59494e-25	0.331548	0.066	0.049	1.73524e-20
ANKRA2	1.03598e-24	0.321995	0.072	0.055	1.87357e-20
IFT20	1.05808e-24	0.42694	0.06	0.045	1.91354e-20
SLC16A14	1.08653e-24	0.187376	0.109	0.087	1.96498e-20
NEK6	1.14953e-24	0.235085	0.184	0.156	2.07893e-20
ALKBH5	1.17311e-24	0.173815	0.206	0.175	2.12157e-20
STX5	1.18952e-24	0.321819	0.099	0.079	2.15124e-20
BAZ2A	1.19934e-24	0.225736	0.155	0.129	2.16901e-20
CCNE2	1.20724e-24	-0.337327	0.151	0.173	2.1833e-20
PHC2	1.26265e-24	0.151666	0.284	0.248	2.2835e-20
ANKRD46	1.32148e-24	0.184843	0.171	0.143	2.38989e-20
TMEM131	1.38332e-24	0.201796	0.204	0.174	2.50173e-20
HECW1	1.41807e-24	0.453465	0.039	0.027	2.56458e-20
CENPE	1.46326e-24	-0.434632	0.072	0.089	2.64631e-20
BAHD1	1.46329e-24	0.299675	0.11	0.089	2.64636e-20
P4HA1	1.54198e-24	0.136676	0.214	0.183	2.78867e-20
NME7	1.58016e-24	0.256157	0.103	0.082	2.85772e-20
PON2	1.71333e-24	-0.275298	0.182	0.205	3.09855e-20
EEF1AKMT4	1.73018e-24	0.959679	0.015	0.007	3.12903e-20
TRAPPC4	1.82717e-24	0.140872	0.277	0.241	3.30443e-20
KCNB2	1.84341e-24	0.59816	0.024	0.014	3.33381e-20
HAP1	1.91589e-24	-0.720303	0.012	0.02	3.46488e-20
VPS37D	1.94584e-24	0.327261	0.069	0.052	3.51904e-20
GUK1	2.00436e-24	0.179873	0.2	0.17	3.62488e-20
RABAC1	2.03939e-24	0.144299	0.281	0.245	3.68824e-20
ATP7A	2.18317e-24	0.916988	0.019	0.011	3.94826e-20
NOVA2	2.22178e-24	0.132003	0.344	0.305	4.01808e-20
MBTD1	2.23781e-24	0.188245	0.197	0.167	4.04707e-20
CLIP3	2.30052e-24	-0.236267	0.321	0.34	4.16049e-20
SNRK	2.31234e-24	0.303768	0.078	0.06	4.18186e-20
UQCRQ	2.48636e-24	0.174995	0.191	0.162	4.49658e-20
NPY	2.51867e-24	0.166331	0.218	0.187	4.55502e-20
KCND3	2.54545e-24	0.699311	0.022	0.012	4.60344e-20
SLC20A1	2.88692e-24	-0.23076	0.229	0.252	5.221e-20
SLC39A7	3.16749e-24	0.241456	0.139	0.115	5.7284e-20
SETD3	3.24655e-24	0.220095	0.155	0.129	5.87138e-20
ZXDA	3.51421e-24	1.16123	0.01	0.004	6.35545e-20
CSNK2B	3.62801e-24	-0.352003	0.128	0.149	6.56125e-20
HERC1	3.81446e-24	0.285279	0.103	0.082	6.89845e-20
PIAS4	3.95015e-24	0.353209	0.069	0.052	7.14384e-20
INTS1	4.06322e-24	0.213039	0.12	0.097	7.34834e-20
ASPHD1	4.13989e-24	0.330873	0.052	0.037	7.487e-20
SRRD	4.14127e-24	0.399894	0.055	0.04	7.48948e-20
SCGN	4.15865e-24	0.203858	0.106	0.085	7.52091e-20
FERMT2	4.20198e-24	0.467413	0.057	0.042	7.59928e-20
SART1	4.47776e-24	0.267473	0.095	0.076	8.09803e-20
IER5	4.82727e-24	0.263044	0.145	0.121	8.73012e-20
INTS4	5.34855e-24	0.298384	0.103	0.082	9.67285e-20
ADGRA1	5.40883e-24	1.10611	0.014	0.007	9.78186e-20
NSMCE4A	5.44241e-24	0.309433	0.082	0.064	9.84259e-20
SAMD4A	5.66595e-24	0.940271	0.019	0.01	1.02469e-19
GALNT1	5.71451e-24	-0.319137	0.169	0.19	1.03347e-19
POFUT2	5.75535e-24	0.368287	0.072	0.055	1.04085e-19
SH3GL3	5.78404e-24	0.273684	0.057	0.042	1.04604e-19
CBLB	5.88239e-24	0.247096	0.101	0.08	1.06383e-19
CACNG4	6.09186e-24	0.139631	0.336	0.297	1.10171e-19
CENPQ	6.4086e-24	-0.613036	0.035	0.048	1.159e-19
SMC2	6.53363e-24	-0.246161	0.188	0.211	1.18161e-19
GINS4	6.62559e-24	-0.59269	0.046	0.061	1.19824e-19
KAT7	6.66056e-24	0.322088	0.116	0.094	1.20456e-19
NCBP2	6.92719e-24	0.174335	0.345	0.307	1.25278e-19
EXT2	7.02824e-24	0.232615	0.123	0.1	1.27106e-19
PLAAT3	7.14419e-24	-0.772952	0.012	0.021	1.29203e-19
CEP78	7.7168e-24	0.176091	0.148	0.122	1.39558e-19
TMCC2	8.67436e-24	0.63302	0.032	0.021	1.56876e-19
RPP25	8.68482e-24	0.412459	0.05	0.036	1.57065e-19
SRSF3	8.93846e-24	-0.21031	0.282	0.303	1.61652e-19
MAPK4	9.11764e-24	0.173231	0.173	0.145	1.64893e-19
PCDH19	9.48288e-24	0.161629	0.127	0.104	1.71498e-19
AMOTL1	1.01627e-23	0.240992	0.127	0.104	1.83793e-19
PSMB6	1.05376e-23	0.229199	0.1	0.08	1.90573e-19
SPARC	1.10727e-23	-0.152062	0.329	0.353	2.00249e-19
PCDH11Y	1.1142e-23	-1.34182	0.005	0.011	2.01502e-19
RCAN3	1.12318e-23	0.219159	0.079	0.061	2.03128e-19
E2F1	1.15999e-23	-0.275435	0.208	0.23	2.09785e-19
C2orf69	1.19394e-23	0.520099	0.042	0.03	2.15924e-19
KIRREL3	1.23264e-23	0.674835	0.027	0.017	2.22924e-19
KPNA4	1.30656e-23	0.307676	0.089	0.07	2.36291e-19
PHACTR4	1.32493e-23	0.263685	0.126	0.104	2.39614e-19
SCAMP5	1.32991e-23	0.145439	0.202	0.172	2.40514e-19
DCLK1	1.42963e-23	0.141424	0.42	0.381	2.58548e-19
FZD7	1.49288e-23	0.448855	0.05	0.036	2.69987e-19
KLHDC9	1.50935e-23	0.682032	0.02	0.012	2.72966e-19
JUP	1.51909e-23	0.435623	0.054	0.04	2.74727e-19
CLN6	1.52188e-23	-0.492722	0.066	0.082	2.75233e-19
QDPR	1.53727e-23	0.284455	0.09	0.071	2.78015e-19
CYYR1	1.55364e-23	-0.545893	0.045	0.059	2.80975e-19
SUMO2	1.5547e-23	-0.13526	0.48	0.496	2.81167e-19
COL22A1	1.56584e-23	-0.615213	0.021	0.032	2.83182e-19
CKS2	1.68295e-23	-0.298627	0.172	0.194	3.04362e-19
CHMP3	1.73353e-23	-0.341935	0.138	0.159	3.13509e-19
MTFR1L	1.76165e-23	0.197611	0.145	0.121	3.18594e-19
IRF2BP2	1.8605e-23	0.292958	0.165	0.139	3.36472e-19
MT-ND3	1.8936e-23	-0.133788	0.536	0.551	3.42457e-19
FBN3	2.03859e-23	0.396534	0.043	0.03	3.68679e-19
NMBR	2.08462e-23	0.506256	0.029	0.018	3.77004e-19
GPRIN2	2.21617e-23	0.326543	0.031	0.02	4.00795e-19
C11orf95	2.40508e-23	0.139284	0.25	0.217	4.34959e-19
TBCB	2.60609e-23	-0.143297	0.484	0.501	4.71311e-19
ZNF709	2.63581e-23	0.294686	0.087	0.069	4.76686e-19
MYT1	2.76732e-23	0.130075	0.227	0.195	5.00469e-19
KANTR	2.84964e-23	0.680167	0.024	0.015	5.15357e-19
TMPO	2.90912e-23	-0.253416	0.26	0.28	5.26115e-19
CACNB3	2.95982e-23	0.218393	0.144	0.12	5.35284e-19
FRAT1	3.00445e-23	0.702359	0.019	0.01	5.43355e-19
STAM2	3.07264e-23	0.340679	0.089	0.07	5.55686e-19
NFATC3	3.14812e-23	0.206592	0.212	0.182	5.69338e-19
ADARB2	3.20819e-23	1.08037	0.011	0.005	5.80201e-19
FXN	3.29126e-23	0.496409	0.041	0.028	5.95225e-19
DLX5	3.3086e-23	-0.179673	0.428	0.449	5.98361e-19
PLPP5	3.38925e-23	0.27536	0.106	0.085	6.12945e-19
TET2	3.39662e-23	0.175533	0.209	0.179	6.14278e-19
WRNIP1	3.94434e-23	0.2186	0.129	0.106	7.13334e-19
MORN4	4.05217e-23	0.230254	0.142	0.118	7.32836e-19
NDUFA2	4.1124e-23	0.154006	0.277	0.243	7.43728e-19
MAN2B1	4.47951e-23	0.342862	0.064	0.048	8.1012e-19
CHIC2	4.64211e-23	-0.264766	0.224	0.245	8.39525e-19
ITFG1	4.78494e-23	0.180249	0.188	0.16	8.65356e-19
SAFB2	5.1438e-23	0.214212	0.154	0.129	9.30257e-19
GABRA2	5.68068e-23	0.298753	0.044	0.031	1.02735e-18
CDKN2C	6.09597e-23	-0.379303	0.111	0.13	1.10246e-18
EXTL2	6.19951e-23	0.313591	0.107	0.087	1.12118e-18
TCEAL9	6.2746e-23	0.15309	0.211	0.181	1.13476e-18
SMC4	6.56512e-23	-0.219881	0.263	0.284	1.1873e-18
CLTA	6.87414e-23	-0.205226	0.336	0.354	1.24319e-18
KIF22	6.97506e-23	-0.263338	0.216	0.237	1.26144e-18
TSN	7.12444e-23	0.172057	0.192	0.164	1.28845e-18
CHD3	7.33266e-23	-0.228249	0.327	0.346	1.32611e-18
NUDT2	7.45548e-23	0.2573	0.081	0.063	1.34832e-18
ADAM22	7.83766e-23	0.247719	0.098	0.078	1.41744e-18
PHF14	8.119e-23	0.173486	0.218	0.188	1.46832e-18
SRGAP3	8.7379e-23	0.146018	0.178	0.151	1.58025e-18
HAGHL	8.86116e-23	0.332798	0.063	0.047	1.60254e-18
SLC37A3	8.9376e-23	0.232089	0.14	0.116	1.61636e-18
RASSF10	9.46294e-23	0.556294	0.026	0.017	1.71137e-18
KLF16	1.02936e-22	0.626474	0.035	0.024	1.86159e-18
UBQLN2	1.05991e-22	0.177849	0.216	0.186	1.91684e-18
SLAIN1	1.13969e-22	0.131057	0.414	0.377	2.06113e-18
TPP1	1.1418e-22	-0.329568	0.116	0.136	2.06495e-18
MCL1	1.18974e-22	0.13226	0.44	0.4	2.15164e-18
CENPK	1.18981e-22	-0.540634	0.045	0.06	2.15177e-18
CDKN3	1.21332e-22	-0.508746	0.057	0.072	2.19429e-18
PDZD11	1.30324e-22	0.256915	0.105	0.085	2.35691e-18
BTAF1	1.31023e-22	0.215413	0.195	0.167	2.36955e-18
ATP11C	1.37226e-22	0.359086	0.054	0.04	2.48173e-18
PTPRG	1.5536e-22	0.200102	0.117	0.096	2.80968e-18
CXCL12	1.60207e-22	-0.900882	0.013	0.022	2.89735e-18
ESRRG	1.71842e-22	-0.37462	0.122	0.142	3.10776e-18
XPO5	1.73363e-22	0.209739	0.197	0.169	3.13527e-18
SLC7A1	1.82419e-22	0.362314	0.081	0.063	3.29906e-18
LNPEP	1.94527e-22	0.326262	0.07	0.054	3.51802e-18
CYTH2	2.01301e-22	-0.194395	0.354	0.372	3.64053e-18
BCS1L	2.06584e-22	0.374112	0.061	0.046	3.73607e-18
DTD2	2.23065e-22	0.254953	0.109	0.089	4.03412e-18
CFDP1	2.33984e-22	-0.202774	0.328	0.346	4.23161e-18
DLL1	2.5732e-22	-0.279826	0.185	0.206	4.65363e-18
PHYHIPL	2.6439e-22	0.164915	0.187	0.159	4.78149e-18
BRI3	2.70555e-22	-0.193368	0.363	0.38	4.893e-18
IFRD2	2.89262e-22	0.802998	0.022	0.013	5.2313e-18
ZNF44	2.89998e-22	0.421497	0.036	0.025	5.24462e-18
MEN1	3.02285e-22	0.238783	0.109	0.088	5.46682e-18
SLC4A3	3.06417e-22	0.548336	0.036	0.025	5.54154e-18
AAGAB	3.1312e-22	-0.375809	0.093	0.112	5.66277e-18
NDUFS6	3.26525e-22	-0.301798	0.195	0.215	5.90521e-18
TMEM263	3.39458e-22	0.176243	0.197	0.169	6.1391e-18
BAD	3.41031e-22	0.364742	0.073	0.056	6.16754e-18
SLC7A6	3.4806e-22	0.315028	0.084	0.066	6.29466e-18
TMEM120A	3.61327e-22	0.775631	0.021	0.013	6.53459e-18
GSDMB	3.62213e-22	0.643691	0.029	0.019	6.55062e-18
KDELR1	3.9397e-22	0.261701	0.105	0.085	7.12494e-18
SHISA7	3.94337e-22	0.386224	0.045	0.032	7.13159e-18
SC5D	3.97368e-22	0.19716	0.139	0.116	7.18639e-18
BEX5	4.16327e-22	0.289095	0.066	0.05	7.52928e-18
WDFY1	4.42441e-22	0.293383	0.092	0.073	8.00154e-18
RENBP	4.45353e-22	-0.621711	0.028	0.04	8.05421e-18
PIK3C3	4.67304e-22	0.289367	0.087	0.069	8.4512e-18
STRBP	4.70662e-22	0.146335	0.181	0.153	8.51192e-18
PRKDC	4.75363e-22	-0.193138	0.336	0.354	8.59694e-18
B4GALNT1	4.78776e-22	0.160888	0.133	0.11	8.65866e-18
KLHL29	4.81161e-22	0.563139	0.03	0.019	8.70179e-18
KNL1	4.86339e-22	-0.360748	0.116	0.135	8.79545e-18
KCNJ3	4.97592e-22	0.546874	0.028	0.018	8.99896e-18
ZNF33A	5.04522e-22	0.262524	0.085	0.067	9.12428e-18
CAND2	5.31032e-22	-0.460325	0.056	0.071	9.60372e-18
NTN1	5.32927e-22	-0.381496	0.127	0.146	9.63799e-18
PPWD1	5.4688e-22	0.3808	0.069	0.053	9.89033e-18
TMEM8B	6.13043e-22	0.140384	0.262	0.228	1.10869e-17
CTIF	6.22164e-22	0.113327	0.223	0.192	1.12518e-17
FGF2	6.67668e-22	0.616833	0.025	0.016	1.20748e-17
VMP1	6.80219e-22	0.227083	0.121	0.099	1.23018e-17
LIN7C	7.07115e-22	0.170475	0.205	0.176	1.27882e-17
PCMTD2	7.49071e-22	0.201831	0.112	0.091	1.3547e-17
NDUFA1	7.58891e-22	-0.273688	0.165	0.186	1.37245e-17
NPTXR	7.62106e-22	0.274605	0.078	0.061	1.37827e-17
GFPT1	8.08275e-22	0.165952	0.179	0.152	1.46176e-17
HR	8.09759e-22	0.54833	0.024	0.015	1.46445e-17
TMEM141	8.49487e-22	0.512305	0.044	0.031	1.5363e-17
GPATCH2L	8.83454e-22	-0.242159	0.243	0.263	1.59773e-17
SEMA5A	9.11125e-22	-0.312456	0.174	0.193	1.64777e-17
R3HCC1L	9.4799e-22	0.804503	0.021	0.012	1.71444e-17
GPR137C	9.71645e-22	-0.354283	0.112	0.131	1.75722e-17
GET3	9.88158e-22	-0.360608	0.135	0.154	1.78708e-17
TKFC	9.91311e-22	0.733619	0.019	0.011	1.79279e-17
CNTRL	1.02254e-21	-0.263035	0.208	0.228	1.84926e-17
IMP4	1.02758e-21	0.352409	0.069	0.053	1.85838e-17
ZNF568	1.0287e-21	0.262027	0.11	0.09	1.8604e-17
IDI1	1.09243e-21	0.258037	0.11	0.09	1.97566e-17
PJA2	1.1038e-21	0.132363	0.476	0.437	1.99622e-17
PARP6	1.15244e-21	0.15785	0.174	0.147	2.08418e-17
MAF	1.2051e-21	-0.434347	0.04	0.053	2.17943e-17
PDZD4	1.20514e-21	0.134573	0.261	0.228	2.17949e-17
CCNL2	1.22229e-21	-0.113442	0.577	0.59	2.2105e-17
GPR107	1.29763e-21	0.170334	0.207	0.179	2.34676e-17
PDZD8	1.3081e-21	0.230806	0.117	0.096	2.36569e-17
PDS5B	1.40567e-21	0.187339	0.229	0.199	2.54216e-17
NOTCH2	1.43701e-21	-0.279194	0.16	0.181	2.59883e-17
BUB3	1.44784e-21	-0.291716	0.185	0.205	2.61843e-17
RAB39B	1.48068e-21	0.32983	0.064	0.049	2.67782e-17
TMEM185A	1.53421e-21	0.246699	0.108	0.088	2.77462e-17
ACTR1B	1.57885e-21	0.164255	0.233	0.202	2.85535e-17
PSME1	1.66028e-21	-0.271665	0.182	0.202	3.00262e-17
RHOA	1.74283e-21	-0.217058	0.219	0.24	3.15191e-17
C11orf71	1.78992e-21	0.265605	0.078	0.061	3.23707e-17
SNX4	1.84651e-21	0.224569	0.128	0.106	3.33942e-17
SARAF	1.87542e-21	0.174458	0.221	0.192	3.39169e-17
BIRC5	1.91991e-21	-0.277025	0.205	0.225	3.47215e-17
APEX1	2.04582e-21	-0.166603	0.453	0.465	3.69987e-17
VPS37B	2.16231e-21	0.178808	0.235	0.205	3.91054e-17
SMAD1	2.25491e-21	0.241832	0.099	0.08	4.078e-17
SCG5	2.37478e-21	0.201283	0.104	0.084	4.29478e-17
KCTD15	2.50032e-21	0.216058	0.118	0.097	4.52183e-17
ROBO2	2.51238e-21	0.117647	0.298	0.262	4.54364e-17
EFNA3	2.54846e-21	0.272068	0.081	0.063	4.60889e-17
WRAP53	2.56589e-21	0.433078	0.04	0.028	4.64041e-17
CAMK2N2	2.6126e-21	0.152241	0.117	0.096	4.72488e-17
ADO	2.72321e-21	0.244436	0.082	0.065	4.92492e-17
FRMD4A	2.85258e-21	0.156447	0.169	0.143	5.15888e-17
NCOA5	3.05186e-21	-0.353272	0.109	0.128	5.51929e-17
DIS3L	3.053e-21	-0.395889	0.055	0.07	5.52134e-17
MLF2	3.10232e-21	0.135204	0.363	0.326	5.61055e-17
DNAJC15	3.17607e-21	-0.681367	0.018	0.027	5.74392e-17
PCNX1	3.18781e-21	0.209997	0.134	0.111	5.76515e-17
PDE5A	3.2662e-21	0.190988	0.117	0.096	5.90692e-17
RAB14	3.29359e-21	0.13668	0.308	0.274	5.95646e-17
SESN3	3.30727e-21	-0.304014	0.149	0.168	5.98119e-17
PLXDC2	3.52714e-21	-0.515157	0.042	0.056	6.37884e-17
PDE2A	3.6064e-21	0.800552	0.015	0.008	6.52218e-17
RBAK	3.67878e-21	0.432728	0.041	0.029	6.65308e-17
USF1	3.70261e-21	0.17923	0.21	0.182	6.69618e-17
INPP4A	3.72713e-21	0.272478	0.074	0.057	6.74051e-17
MCM4	3.86393e-21	-0.213969	0.281	0.3	6.98791e-17
OXA1L	3.92738e-21	0.131885	0.246	0.214	7.10266e-17
C2orf92	3.93367e-21	-0.600128	0.024	0.034	7.11404e-17
BET1	4.06374e-21	0.512972	0.033	0.022	7.34927e-17
GRINA	4.14137e-21	-0.199727	0.308	0.327	7.48967e-17
SLC35B1	4.22936e-21	0.200122	0.134	0.112	7.64881e-17
ZNF516	4.28897e-21	0.170596	0.173	0.147	7.7566e-17
USP10	4.31004e-21	0.220745	0.186	0.16	7.7947e-17
SEC24C	4.69098e-21	0.153718	0.236	0.206	8.48363e-17
SF3A2	4.81284e-21	0.138233	0.231	0.201	8.70402e-17
EID1	5.12765e-21	-0.104264	0.605	0.618	9.27336e-17
RBX1	5.21692e-21	-0.241193	0.275	0.293	9.43481e-17
CDC20	5.4234e-21	-0.285122	0.192	0.213	9.80822e-17
FAM181B	5.48735e-21	0.210847	0.24	0.213	9.92387e-17
LETMD1	5.52707e-21	0.326646	0.059	0.045	9.99571e-17
HACE1	5.86089e-21	0.193558	0.191	0.164	1.05994e-16
FOXO6	5.89165e-21	0.209505	0.078	0.061	1.06551e-16
TLCD3A	6.31101e-21	0.783187	0.027	0.018	1.14135e-16
STK16	7.3633e-21	0.394329	0.049	0.036	1.33165e-16
E2F8	7.50645e-21	-0.715636	0.022	0.032	1.35754e-16
SET	7.58263e-21	-0.160855	0.363	0.382	1.37132e-16
ZNF583	7.59098e-21	0.531046	0.035	0.024	1.37283e-16
NTSR1	7.73568e-21	0.523706	0.021	0.013	1.399e-16
INTS10	7.81402e-21	0.293044	0.094	0.076	1.41317e-16
FAM183A	7.88901e-21	0.710698	0.014	0.008	1.42673e-16
FBXO34	7.91081e-21	0.58238	0.03	0.02	1.43067e-16
TENT2	8.07793e-21	0.258104	0.097	0.079	1.46089e-16
ANXA5	8.30496e-21	0.14436	0.206	0.177	1.50195e-16
PCDH1	8.38832e-21	0.147692	0.148	0.123	1.51703e-16
HAX1	8.54058e-21	0.275339	0.108	0.089	1.54456e-16
NMRAL1	8.66179e-21	-0.548131	0.043	0.056	1.56648e-16
TYMS	8.81014e-21	-0.158742	0.358	0.379	1.59331e-16
RTF2	8.95456e-21	0.165321	0.161	0.136	1.61943e-16
HPF1	8.96226e-21	0.278953	0.074	0.057	1.62083e-16
TUBB	9.1618e-21	-0.132413	0.491	0.506	1.65691e-16
DNAH11	9.226e-21	-1.26229	0.006	0.012	1.66852e-16
DUSP16	9.56737e-21	0.207969	0.184	0.158	1.73026e-16
FAM221A	1.00487e-20	-0.435106	0.073	0.089	1.81731e-16
LITAF	1.0057e-20	-0.31848	0.141	0.16	1.81881e-16
IL17RD	1.04117e-20	0.212513	0.128	0.106	1.88296e-16
DNAH9	1.13403e-20	-1.03352	0.006	0.012	2.05089e-16
TMEM120B	1.18015e-20	0.276067	0.064	0.049	2.1343e-16
SIN3B	1.20913e-20	0.176028	0.193	0.166	2.18672e-16
NARF	1.21063e-20	0.114992	0.276	0.243	2.18943e-16
WBP1	1.24054e-20	0.122677	0.335	0.299	2.24352e-16
SMAD5	1.26569e-20	0.205903	0.204	0.177	2.289e-16
MMS22L	1.3008e-20	-0.275066	0.109	0.128	2.3525e-16
ATP1A3	1.38858e-20	0.105869	0.295	0.26	2.51125e-16
ABRAXAS2	1.3905e-20	0.635261	0.025	0.016	2.51472e-16
PHAX	1.43606e-20	0.240856	0.099	0.08	2.59711e-16
CD46	1.50871e-20	-0.240045	0.21	0.23	2.7285e-16
CHPF	1.58322e-20	0.141928	0.154	0.13	2.86326e-16
C12orf57	1.58855e-20	0.111421	0.543	0.504	2.8729e-16
KLF10	1.60417e-20	0.391181	0.043	0.031	2.90114e-16
KDELR2	1.61302e-20	0.230818	0.14	0.118	2.91714e-16
ARHGEF6	1.74006e-20	-0.482201	0.045	0.058	3.14689e-16
PVR	1.78499e-20	0.314903	0.062	0.047	3.22816e-16
NDUFAF7	1.81771e-20	0.283325	0.081	0.064	3.28733e-16
CEP55	1.83522e-20	-0.461362	0.073	0.088	3.319e-16
FNDC5	1.85586e-20	0.294297	0.062	0.047	3.35633e-16
CADM1	1.93549e-20	-0.147817	0.535	0.543	3.50033e-16
ST3GAL2	1.94987e-20	0.582405	0.04	0.028	3.52634e-16
LRCH3	2.01083e-20	0.193178	0.13	0.109	3.63659e-16
HMGA2	2.08587e-20	0.238751	0.084	0.067	3.77229e-16
BBIP1	2.16453e-20	0.364029	0.071	0.055	3.91455e-16
STK38L	2.30303e-20	0.307116	0.063	0.048	4.16503e-16
TIMM23	2.4137e-20	0.273871	0.115	0.095	4.36517e-16
GALNT14	2.64479e-20	0.739557	0.015	0.008	4.7831e-16
TMEM59L	2.72802e-20	0.14032	0.209	0.181	4.93362e-16
ST3GAL5	2.78456e-20	0.310004	0.057	0.043	5.03589e-16
PTN	2.82766e-20	0.133972	0.735	0.721	5.11383e-16
DKK3	2.99563e-20	0.139017	0.222	0.193	5.41759e-16
KRT10	3.20264e-20	0.259267	0.098	0.079	5.79197e-16
KCNH2	3.26062e-20	0.466309	0.034	0.023	5.89683e-16
DISP3	3.40713e-20	0.176782	0.096	0.077	6.1618e-16
KYAT1	3.4697e-20	0.649775	0.029	0.019	6.27495e-16
SPC25	3.66403e-20	-0.336635	0.14	0.159	6.62639e-16
LARP1B	3.706e-20	0.311617	0.079	0.063	6.7023e-16
GSK3B	3.74251e-20	0.186709	0.193	0.167	6.76833e-16
GLS	3.82802e-20	0.289007	0.094	0.076	6.92298e-16
RHOB	3.90736e-20	0.149966	0.207	0.179	7.06647e-16
FAM192A	4.13697e-20	0.739208	0.025	0.016	7.48171e-16
HYLS1	4.17056e-20	1.00172	0.012	0.006	7.54245e-16
RPRD1A	4.20172e-20	0.167506	0.301	0.269	7.59881e-16
AGPAT1	4.40232e-20	0.145465	0.231	0.202	7.96159e-16
GRIP2	4.46368e-20	0.270923	0.11	0.091	8.07256e-16
FOXK1	4.53556e-20	0.175777	0.188	0.162	8.20255e-16
MXD1	4.5813e-20	0.319263	0.057	0.043	8.28528e-16
KDM2A	4.58189e-20	0.29478	0.084	0.067	8.28634e-16
FAM177A1	4.63299e-20	0.263764	0.077	0.061	8.37877e-16
PACRG	4.83987e-20	-0.682147	0.018	0.027	8.7529e-16
TRMT9B	5.06688e-20	-0.651152	0.026	0.037	9.16344e-16
TPGS2	5.51179e-20	-0.154165	0.451	0.466	9.96807e-16
DDX52	5.56323e-20	-0.355231	0.095	0.112	1.00611e-15
ANKH	5.65372e-20	0.230003	0.07	0.054	1.02248e-15
FCHO2	5.66117e-20	0.835694	0.017	0.009	1.02382e-15
DNAJB5	5.66635e-20	0.211805	0.128	0.107	1.02476e-15
DLGAP5	5.72664e-20	-0.325779	0.134	0.152	1.03566e-15
IFT122	5.9202e-20	0.532125	0.035	0.024	1.07067e-15
SH3GL1	6.03977e-20	0.239477	0.159	0.136	1.09229e-15
IPPK	6.15772e-20	0.36574	0.053	0.039	1.11362e-15
CLCN3	6.21765e-20	0.15866	0.252	0.221	1.12446e-15
GRIP1	6.27195e-20	0.217393	0.071	0.055	1.13428e-15
EXOC7	6.40935e-20	-0.202986	0.313	0.33	1.15913e-15
SIPA1L2	6.47629e-20	0.197538	0.14	0.118	1.17124e-15
SUN2	6.75047e-20	0.128992	0.165	0.14	1.22082e-15
GLUL	7.10237e-20	-0.166776	0.331	0.35	1.28446e-15
YIF1A	7.23341e-20	0.193847	0.129	0.108	1.30816e-15
NKAIN1	7.25981e-20	0.172199	0.088	0.071	1.31294e-15
PTPN13	7.268e-20	0.229691	0.112	0.093	1.31442e-15
DGCR8	7.6376e-20	-0.312906	0.142	0.16	1.38126e-15
PATZ1	7.76602e-20	0.116219	0.194	0.166	1.40449e-15
SMOC1	7.8209e-20	-0.24029	0.251	0.271	1.41441e-15
USP48	7.97942e-20	0.206328	0.175	0.151	1.44308e-15
AKT3	8.2794e-20	0.113587	0.433	0.393	1.49733e-15
S1PR1	8.49456e-20	0.178381	0.137	0.115	1.53624e-15
PGAM1	8.67043e-20	-0.293231	0.237	0.255	1.56805e-15
KIAA0319L	8.9008e-20	0.259919	0.079	0.062	1.60971e-15
NUDT11	9.18167e-20	0.372867	0.049	0.037	1.6605e-15
PCNA	9.61012e-20	-0.246524	0.213	0.232	1.73799e-15
VPS41	9.68978e-20	0.196425	0.14	0.118	1.7524e-15
C1QL2	9.74084e-20	1.11463	0.012	0.006	1.76163e-15
PCDHAC1	1.01445e-19	0.193034	0.13	0.108	1.83463e-15
MBD6	1.0253e-19	0.190746	0.146	0.124	1.85426e-15
HEXD	1.0455e-19	0.556929	0.039	0.028	1.89079e-15
PPM1B	1.0565e-19	0.131781	0.205	0.177	1.91069e-15
CCSAP	1.08536e-19	0.120815	0.195	0.167	1.96286e-15
PXK	1.09193e-19	0.247178	0.087	0.069	1.97475e-15
KRBA2	1.11247e-19	0.524392	0.035	0.024	2.0119e-15
KNDC1	1.11751e-19	0.566643	0.027	0.018	2.02102e-15
JPT2	1.11788e-19	0.335359	0.079	0.063	2.02169e-15
RNF187	1.14112e-19	-0.166166	0.347	0.364	2.06372e-15
CRYM	1.14605e-19	-0.589759	0.019	0.028	2.07264e-15
KLHL20	1.18697e-19	0.349988	0.057	0.043	2.14664e-15
PSMA7	1.23791e-19	-0.247334	0.2	0.22	2.23877e-15
ZNF254	1.24629e-19	-0.250597	0.215	0.234	2.25391e-15
NRDC	1.27577e-19	0.17152	0.204	0.177	2.30724e-15
PNPLA8	1.30179e-19	0.536359	0.034	0.024	2.35429e-15
SEPTIN5	1.32349e-19	-0.146482	0.431	0.446	2.39353e-15
DNTTIP1	1.39891e-19	0.230674	0.108	0.089	2.52994e-15
ADAM19	1.40472e-19	0.595683	0.024	0.015	2.54043e-15
ECHDC2	1.41738e-19	-1.09265	0.005	0.01	2.56334e-15
MINDY2	1.43156e-19	0.353671	0.06	0.046	2.58897e-15
CNR1	1.47445e-19	0.162789	0.097	0.079	2.66654e-15
ENHO	1.51069e-19	0.132253	0.151	0.128	2.73209e-15
LONP2	1.56845e-19	0.147393	0.175	0.15	2.83654e-15
COMMD10	1.60628e-19	0.354396	0.043	0.031	2.90496e-15
EFCAB7	1.61792e-19	0.386927	0.051	0.038	2.926e-15
SALL2	1.66464e-19	0.168005	0.169	0.144	3.01051e-15
EPHA3	1.76665e-19	0.265621	0.14	0.118	3.19499e-15
MT3	1.91507e-19	-0.401569	0.054	0.068	3.4634e-15
MATN2	1.94848e-19	0.666235	0.019	0.012	3.52382e-15
SPSB4	2.02718e-19	0.463256	0.036	0.026	3.66615e-15
TRIM23	2.05341e-19	0.180164	0.12	0.099	3.7136e-15
GNB3	2.15183e-19	0.421893	0.048	0.035	3.89158e-15
LIN28B	2.1672e-19	0.386012	0.028	0.019	3.91938e-15
PGAP1	2.19645e-19	0.130951	0.245	0.215	3.97228e-15
SPRY1	2.2275e-19	0.328347	0.04	0.029	4.02843e-15
IFT88	2.33666e-19	0.245773	0.085	0.069	4.22585e-15
CORO7	2.43338e-19	0.187709	0.125	0.104	4.40077e-15
INTS11	2.46028e-19	0.154904	0.235	0.206	4.44941e-15
PTBP1	2.46533e-19	-0.376006	0.091	0.108	4.45855e-15
NEMP1	2.49135e-19	-0.382519	0.102	0.119	4.5056e-15
OSBPL2	2.54524e-19	0.158004	0.159	0.135	4.60306e-15
POGK	2.75988e-19	0.179839	0.179	0.154	4.99124e-15
TIPIN	2.76442e-19	0.857176	0.016	0.009	4.99946e-15
MAPKAPK5	2.80694e-19	0.164895	0.175	0.15	5.07635e-15
MOGS	2.8995e-19	0.198637	0.135	0.113	5.24374e-15
SSNA1	2.90819e-19	0.364696	0.064	0.05	5.25946e-15
SF3B6	2.99369e-19	0.280635	0.072	0.057	5.41409e-15
TK2	2.9958e-19	0.445674	0.046	0.034	5.4179e-15
NUDT21	2.99729e-19	0.160497	0.286	0.255	5.4206e-15
POGZ	3.01301e-19	0.150063	0.253	0.223	5.44903e-15
THAP11	3.01583e-19	0.269	0.091	0.074	5.45413e-15
POLR3A	3.12279e-19	0.242372	0.103	0.085	5.64756e-15
AK1	3.2342e-19	0.215209	0.119	0.099	5.84905e-15
IGSF9	4.08454e-19	0.30638	0.078	0.062	7.3869e-15
RGS20	4.45227e-19	0.298114	0.041	0.03	8.05192e-15
CAMK4	4.74727e-19	0.112974	0.147	0.124	8.58544e-15
IK	4.75957e-19	0.222861	0.115	0.096	8.60768e-15
MAP4	5.06048e-19	-0.1285	0.45	0.464	9.15187e-15
GPT2	5.22368e-19	-0.256896	0.166	0.185	9.44702e-15
ZBTB41	5.46714e-19	0.182105	0.099	0.081	9.88733e-15
BBS7	6.08015e-19	0.202507	0.085	0.068	1.09959e-14
DAP	6.08462e-19	-0.269135	0.148	0.167	1.1004e-14
KIFAP3	6.50898e-19	0.165297	0.231	0.203	1.17715e-14
LOXL1	6.7215e-19	-0.539444	0.043	0.055	1.21558e-14
SHISA4	6.89265e-19	0.244622	0.075	0.059	1.24654e-14
CCZ1	7.26941e-19	-0.763012	0.013	0.02	1.31467e-14
C17orf58	7.29959e-19	0.303815	0.055	0.042	1.32013e-14
SORCS3	7.81134e-19	-0.413731	0.081	0.096	1.41268e-14
GEN1	7.91051e-19	-0.479341	0.068	0.083	1.43062e-14
CMTM4	8.36243e-19	0.212026	0.116	0.096	1.51235e-14
SERP1	8.53054e-19	0.19398	0.16	0.137	1.54275e-14
ETV1	9.16114e-19	-0.197024	0.287	0.306	1.65679e-14
XPO1	9.29086e-19	0.134953	0.211	0.184	1.68025e-14
TRIB1	9.39892e-19	0.359491	0.036	0.025	1.69979e-14
CD200	9.55651e-19	0.124119	0.178	0.152	1.7283e-14
TBC1D30	9.59659e-19	0.291461	0.039	0.028	1.73554e-14
TSPAN6	9.82122e-19	0.265649	0.132	0.111	1.77617e-14
ZIC2	1.00232e-18	-0.619324	0.05	0.063	1.8127e-14
NKX2-1	1.01344e-18	-1.35359	0.005	0.01	1.83281e-14
KLF11	1.01366e-18	0.462331	0.028	0.019	1.8332e-14
HES5	1.01553e-18	0.175706	0.575	0.557	1.83658e-14
GSPT2	1.03582e-18	0.35462	0.052	0.039	1.87328e-14
BMT2	1.06175e-18	0.156795	0.157	0.134	1.92018e-14
PROM1	1.10921e-18	-0.42383	0.091	0.107	2.006e-14
AJAP1	1.14374e-18	0.403099	0.024	0.015	2.06846e-14
UBXN7	1.15163e-18	0.156579	0.181	0.156	2.08273e-14
KBTBD11	1.18901e-18	0.199887	0.086	0.069	2.15033e-14
KPNA6	1.19345e-18	0.196685	0.133	0.113	2.15835e-14
PRKACA	1.2016e-18	-0.182889	0.326	0.343	2.17309e-14
TRPM7	1.23297e-18	0.306821	0.076	0.06	2.22983e-14
ASF1B	1.24171e-18	-0.382862	0.088	0.104	2.24563e-14
NTRK2	1.24505e-18	0.233964	0.251	0.223	2.25167e-14
SSBP1	1.26585e-18	-0.337582	0.14	0.158	2.2893e-14
GLMN	1.35472e-18	0.491818	0.033	0.023	2.45e-14
SLC30A5	1.43168e-18	0.312414	0.079	0.064	2.58919e-14
ING1	1.57564e-18	0.434207	0.049	0.037	2.84955e-14
VN1R1	1.5888e-18	0.237819	0.059	0.045	2.87335e-14
GMPPB	1.65136e-18	0.267402	0.077	0.061	2.98648e-14
RBM15B	1.69521e-18	-0.217951	0.243	0.261	3.06579e-14
SMURF2	1.89781e-18	0.169982	0.133	0.112	3.4322e-14
NIF3L1	1.90648e-18	0.490825	0.039	0.028	3.44787e-14
INHBB	1.95049e-18	0.392144	0.047	0.035	3.52745e-14
NKX6-2	1.9887e-18	-1.05703	0.008	0.014	3.59656e-14
STRN3	2.16836e-18	0.173166	0.158	0.135	3.92148e-14
CTXN1	2.29003e-18	-0.116167	0.54	0.553	4.14153e-14
RFX4	2.43857e-18	0.320117	0.094	0.077	4.41015e-14
EEF1AKNMT	2.45547e-18	0.417431	0.056	0.043	4.44072e-14
CEBPZOS	2.48252e-18	0.100277	0.112	0.092	4.48964e-14
GJA1	2.51429e-18	-0.459357	0.034	0.045	4.5471e-14
DOK6	2.52519e-18	0.217228	0.061	0.047	4.5668e-14
ISOC2	2.54322e-18	0.417423	0.045	0.033	4.59942e-14
REPS2	2.61774e-18	0.856126	0.012	0.006	4.73419e-14
FLYWCH2	2.64081e-18	0.154703	0.129	0.108	4.77591e-14
IQCE	2.65835e-18	0.393408	0.035	0.024	4.80763e-14
RAB8B	2.68827e-18	0.131808	0.214	0.187	4.86173e-14
CDS2	2.83234e-18	0.170239	0.183	0.158	5.12229e-14
TRIM24	2.83631e-18	0.101857	0.351	0.315	5.12947e-14
RFWD3	2.87082e-18	-0.379904	0.093	0.109	5.19187e-14
FLAD1	2.9479e-18	0.488371	0.039	0.028	5.33128e-14
GOSR2	3.05781e-18	0.144091	0.225	0.198	5.53005e-14
JAM2	3.13224e-18	0.223856	0.103	0.085	5.66465e-14
TEN1	3.22328e-18	-0.425334	0.05	0.063	5.8293e-14
BIRC2	3.33939e-18	0.238758	0.12	0.1	6.03928e-14
ZSWIM6	3.42262e-18	0.108739	0.193	0.166	6.18981e-14
UBXN2A	3.42352e-18	0.15551	0.158	0.135	6.19144e-14
GNL3	3.5581e-18	-0.274029	0.164	0.182	6.43483e-14
HEMK1	3.58565e-18	0.292913	0.075	0.06	6.48466e-14
PDE9A	3.81641e-18	0.231615	0.112	0.093	6.90198e-14
WNK1	3.82406e-18	0.136892	0.333	0.3	6.91581e-14
SHCBP1	3.99509e-18	-0.407791	0.066	0.08	7.22513e-14
AZIN2	4.03429e-18	0.820605	0.015	0.009	7.29601e-14
SAMD10	4.11816e-18	0.444683	0.035	0.025	7.44769e-14
ARRDC1	4.15793e-18	0.204164	0.081	0.065	7.51962e-14
GATM	4.24909e-18	0.160793	0.119	0.099	7.68448e-14
CCDC71L	4.2873e-18	0.251287	0.076	0.061	7.75358e-14
TAFA5	4.30461e-18	0.198052	0.115	0.096	7.78489e-14
UQCRFS1	4.33658e-18	0.857827	0.014	0.008	7.84271e-14
UQCC2	4.35901e-18	-0.209073	0.242	0.261	7.88327e-14
CA12	4.5547e-18	0.241928	0.126	0.107	8.23718e-14
CASTOR3	4.63632e-18	-0.234465	0.225	0.243	8.38478e-14
TOB1	4.67595e-18	0.198136	0.21	0.185	8.45646e-14
SLC30A9	4.93443e-18	0.121571	0.253	0.223	8.92391e-14
COPB2	5.18566e-18	0.160248	0.243	0.215	9.37827e-14
COL27A1	5.27115e-18	0.488903	0.025	0.016	9.53288e-14
ELP4	5.30136e-18	0.179708	0.126	0.106	9.58751e-14
NPAS3	5.37584e-18	0.161788	0.199	0.173	9.72221e-14
FHL1	5.45884e-18	0.35557	0.048	0.036	9.87232e-14
FRMD5	5.56587e-18	0.310818	0.05	0.038	1.00659e-13
IGF2BP2	5.66744e-18	0.111132	0.229	0.2	1.02496e-13
BCKDK	5.71868e-18	0.276476	0.083	0.067	1.03422e-13
APP	5.83236e-18	-0.13812	0.519	0.526	1.05478e-13
SIX3	5.90936e-18	-0.300629	0.164	0.182	1.06871e-13
STC2	5.95566e-18	0.235362	0.054	0.041	1.07708e-13
FREM2	6.03949e-18	-0.855148	0.012	0.019	1.09224e-13
FXR1	6.23278e-18	0.199206	0.149	0.128	1.1272e-13
PEX5	6.44424e-18	0.260471	0.073	0.058	1.16544e-13
C1QTNF1	6.61824e-18	-0.982082	0.007	0.013	1.19691e-13
SPIN4	6.8705e-18	0.217621	0.125	0.105	1.24253e-13
RESF1	6.87058e-18	0.262772	0.094	0.077	1.24255e-13
H2AFY	7.01074e-18	-0.260324	0.199	0.217	1.26789e-13
FGFR1	7.01585e-18	0.213506	0.147	0.125	1.26882e-13
USP34	7.25841e-18	0.166955	0.194	0.169	1.31268e-13
TNC	7.26346e-18	-0.131083	0.281	0.303	1.3136e-13
MKRN3	7.41404e-18	0.424077	0.04	0.029	1.34083e-13
ELAVL1	7.4569e-18	-0.148948	0.378	0.392	1.34858e-13
ADAM17	7.8609e-18	0.267043	0.113	0.095	1.42164e-13
N4BP1	8.45906e-18	0.332847	0.065	0.051	1.52982e-13
NADK2	8.55173e-18	0.181507	0.136	0.115	1.54658e-13
CACNA2D3	8.6302e-18	0.519403	0.022	0.014	1.56077e-13
FDPS	8.65067e-18	-0.30151	0.129	0.146	1.56447e-13
NIPA1	9.00138e-18	0.201144	0.082	0.066	1.6279e-13
MAD2L2	9.01403e-18	-0.248907	0.273	0.287	1.63019e-13
PIMREG	9.24835e-18	-0.375153	0.1	0.116	1.67256e-13
PCLAF	9.51593e-18	-0.322463	0.15	0.167	1.72096e-13
DSCAML1	9.78615e-18	0.195503	0.063	0.049	1.76983e-13
TOX	1.01124e-17	0.196294	0.223	0.197	1.82882e-13
PWWP3A	1.0544e-17	-0.245128	0.229	0.246	1.90688e-13
ZNF703	1.09067e-17	-0.328255	0.088	0.104	1.97247e-13
ASXL1	1.09962e-17	-0.206395	0.3	0.316	1.98866e-13
CBX2	1.11021e-17	-0.320902	0.13	0.147	2.00781e-13
MBLAC2	1.11477e-17	0.448766	0.031	0.022	2.01607e-13
SMAD7	1.2763e-17	0.371859	0.036	0.026	2.30819e-13
PLPPR2	1.29387e-17	0.265692	0.08	0.065	2.33996e-13
LIPG	1.35236e-17	-0.142392	0.302	0.324	2.44574e-13
CENPA	1.3593e-17	-0.406372	0.093	0.108	2.4583e-13
AIDA	1.36788e-17	0.835385	0.015	0.008	2.4738e-13
EPHA5	1.38205e-17	-0.442863	0.072	0.086	2.49944e-13
MPDZ	1.39176e-17	0.217888	0.113	0.094	2.517e-13
CDK5R2	1.44472e-17	0.258627	0.044	0.033	2.61278e-13
PRPF4B	1.44709e-17	-0.271126	0.181	0.198	2.61705e-13
AMBN	1.44914e-17	0.237767	0.088	0.072	2.62078e-13
NCK1	1.46706e-17	0.238486	0.083	0.067	2.65318e-13
PLCL1	1.49129e-17	0.361118	0.041	0.03	2.697e-13
APPL2	1.56378e-17	0.195503	0.124	0.105	2.82809e-13
CSE1L	1.64991e-17	0.195174	0.103	0.086	2.98385e-13
EED	1.68403e-17	-0.393365	0.079	0.094	3.04557e-13
JMJD8	1.69382e-17	0.233615	0.084	0.068	3.06327e-13
PREB	1.71158e-17	0.31213	0.066	0.052	3.0954e-13
POMGNT2	1.71214e-17	0.625586	0.028	0.019	3.09641e-13
SEC24A	1.86928e-17	0.186313	0.116	0.097	3.3806e-13
PCDHGA7	1.87939e-17	0.573695	0.022	0.014	3.39888e-13
CDCA8	2.03216e-17	0.306166	0.057	0.044	3.67517e-13
CITED2	2.08314e-17	0.103393	0.224	0.196	3.76735e-13
SCN9A	2.19295e-17	-0.924966	0.008	0.014	3.96596e-13
DTNB	2.24382e-17	0.160142	0.131	0.11	4.05795e-13
PIANP	2.39342e-17	0.174957	0.093	0.076	4.3285e-13
PDZRN4	2.42015e-17	0.470071	0.035	0.025	4.37683e-13
FKBP15	2.55013e-17	0.687494	0.019	0.012	4.61191e-13
FIGN	2.58061e-17	0.492873	0.033	0.023	4.66702e-13
F2R	2.61305e-17	0.237382	0.094	0.078	4.7257e-13
PHLDB1	2.65322e-17	0.115479	0.191	0.166	4.79835e-13
SELENON	2.83565e-17	0.117867	0.209	0.183	5.12827e-13
PMAIP1	2.84632e-17	0.497884	0.03	0.021	5.14757e-13
ARMCX1	2.87171e-17	0.142675	0.153	0.131	5.19349e-13
IGSF11	2.9088e-17	0.380541	0.048	0.037	5.26057e-13
ABAT	2.97437e-17	0.130019	0.389	0.356	5.37914e-13
PM20D2	2.97627e-17	0.310487	0.076	0.061	5.38258e-13
SH3BGRL	2.98711e-17	-0.184539	0.283	0.3	5.40219e-13
FAM50A	3.01418e-17	0.187327	0.126	0.106	5.45115e-13
IDH3G	3.11643e-17	0.206377	0.099	0.082	5.63607e-13
CCNG2	3.13302e-17	-0.174047	0.319	0.335	5.66607e-13
UQCRC2	3.19743e-17	0.148498	0.156	0.134	5.78255e-13
LDB2	3.22289e-17	-0.495194	0.057	0.07	5.8286e-13
CSRP1	3.29474e-17	-0.529784	0.043	0.055	5.95854e-13
MED4	3.37856e-17	0.171427	0.148	0.127	6.11012e-13
CDC25C	3.50774e-17	-0.450655	0.081	0.096	6.34374e-13
ARL10	3.51911e-17	0.196747	0.135	0.115	6.3643e-13
BTG2	3.69784e-17	0.242828	0.116	0.098	6.68754e-13
EFNA1	3.9076e-17	0.715507	0.014	0.008	7.06689e-13
LTB4R	4.07418e-17	0.518033	0.029	0.02	7.36815e-13
SH3BP5	4.30027e-17	0.145478	0.087	0.07	7.77704e-13
NRIP1	4.44644e-17	0.145436	0.128	0.109	8.04138e-13
ZNF587B	4.45114e-17	-0.350507	0.048	0.061	8.04988e-13
IQCK	4.4903e-17	0.571067	0.024	0.016	8.12071e-13
TRIOBP	4.57879e-17	-0.238553	0.183	0.2	8.28074e-13
KLHL4	4.65733e-17	0.939193	0.01	0.005	8.42278e-13
WDCP	5.41317e-17	0.385398	0.048	0.036	9.78971e-13
GCA	5.42623e-17	-0.215066	0.133	0.15	9.81333e-13
USP38	5.45103e-17	0.277839	0.072	0.058	9.85819e-13
LTBP1	5.52774e-17	0.440177	0.042	0.032	9.99692e-13
FBXL20	5.55306e-17	0.194241	0.075	0.06	1.00427e-12
ZKSCAN1	5.57199e-17	-0.225755	0.253	0.27	1.00769e-12
ANO5	5.57871e-17	0.394059	0.047	0.036	1.00891e-12
SPOCK3	5.68797e-17	0.636019	0.014	0.008	1.02867e-12
NOG	5.75668e-17	0.252424	0.058	0.045	1.04109e-12
PPP2CA	5.85499e-17	0.200315	0.157	0.136	1.05887e-12
C11orf1	5.87446e-17	0.239264	0.051	0.039	1.0624e-12
SMAP1	6.11782e-17	0.117405	0.187	0.162	1.10641e-12
YPEL1	6.29016e-17	-0.302542	0.157	0.174	1.13758e-12
CLCN7	6.44764e-17	-0.342617	0.109	0.125	1.16606e-12
XKR7	6.4902e-17	0.140797	0.076	0.061	1.17375e-12
SLIT2	6.5963e-17	-0.656776	0.023	0.032	1.19294e-12
TAX1BP3	6.62413e-17	0.143696	0.145	0.123	1.19797e-12
MANBA	6.71057e-17	0.182436	0.075	0.06	1.21361e-12
SPRY2	7.1662e-17	0.223595	0.113	0.095	1.29601e-12
DUSP1	7.54898e-17	0.12545	0.107	0.088	1.36523e-12
ZEB1	7.61837e-17	0.108848	0.223	0.195	1.37778e-12
C22orf39	7.68378e-17	0.274973	0.062	0.049	1.38961e-12
PI4KA	7.98307e-17	0.149248	0.183	0.159	1.44374e-12
ACOT9	8.0867e-17	0.428785	0.027	0.019	1.46248e-12
SAPCD2	8.1125e-17	-0.383911	0.092	0.107	1.46715e-12
MTMR3	8.28374e-17	0.141529	0.119	0.1	1.49811e-12
MAP3K13	8.34485e-17	0.136811	0.138	0.117	1.50917e-12
IKZF4	8.49991e-17	0.334075	0.053	0.041	1.53721e-12
LRRC41	8.74001e-17	0.160079	0.217	0.192	1.58063e-12
ATP7B	8.85997e-17	0.351891	0.043	0.032	1.60233e-12
MEF2C	9.07553e-17	0.201075	0.06	0.047	1.64131e-12
ZDHHC2	9.33437e-17	0.201045	0.11	0.092	1.68812e-12
NCSTN	9.47797e-17	0.150909	0.144	0.123	1.71409e-12
VAV2	9.73741e-17	0.18799	0.127	0.107	1.76101e-12
NOCT	9.94463e-17	0.296095	0.054	0.041	1.79849e-12
BLCAP	1.01883e-16	-0.170023	0.309	0.324	1.84256e-12
INO80	1.03304e-16	0.578714	0.027	0.018	1.86825e-12
FOXN2	1.04098e-16	0.262135	0.078	0.063	1.88261e-12
ECEL1	1.05987e-16	-0.634217	0.05	0.062	1.91677e-12
OTUD7A	1.0999e-16	-0.849467	0.008	0.013	1.98917e-12
STK33	1.10108e-16	0.380097	0.053	0.041	1.9913e-12
PEBP1	1.10378e-16	0.102395	0.344	0.311	1.99618e-12
HSPD1	1.10427e-16	0.179514	0.297	0.268	1.99708e-12
KIAA0895L	1.16142e-16	0.134134	0.206	0.18	2.10043e-12
NUDCD1	1.21128e-16	0.15435	0.146	0.124	2.1906e-12
PCDHA11	1.26122e-16	0.213596	0.062	0.049	2.28091e-12
FAM111B	1.46466e-16	-0.403777	0.079	0.093	2.64884e-12
ARC	1.5304e-16	0.388703	0.036	0.026	2.76773e-12
ZBTB16	1.5753e-16	0.572609	0.016	0.009	2.84892e-12
UBE2L6	1.58637e-16	0.162062	0.167	0.144	2.86896e-12
MPZL1	1.62258e-16	0.237114	0.074	0.06	2.93443e-12
TMEM50B	1.67062e-16	0.219922	0.135	0.115	3.02132e-12
PAM	1.68595e-16	-0.248356	0.179	0.196	3.04904e-12
LAMP5	1.68777e-16	0.111228	0.107	0.089	3.05233e-12
WAPL	1.85844e-16	0.152179	0.175	0.152	3.36099e-12
TSPOAP1	1.89336e-16	0.175163	0.123	0.104	3.42414e-12
CLEC11A	1.90053e-16	0.315107	0.053	0.041	3.43711e-12
YAF2	1.91911e-16	0.138933	0.166	0.143	3.47071e-12
NIM1K	1.94015e-16	0.50774	0.024	0.016	3.50876e-12
COPG1	1.94954e-16	0.129338	0.292	0.262	3.52574e-12
C12orf75	1.96208e-16	0.187727	0.092	0.075	3.54842e-12
GNL2	2.02047e-16	-0.317177	0.112	0.128	3.65402e-12
ZNF367	2.05429e-16	-0.478313	0.05	0.062	3.71518e-12
ZIC5	2.07839e-16	-0.619482	0.024	0.033	3.75877e-12
CRYL1	2.14992e-16	0.264323	0.095	0.079	3.88813e-12
ILF3	2.28566e-16	-0.113013	0.54	0.548	4.13361e-12
BTBD3	2.3242e-16	0.18297	0.105	0.088	4.20332e-12
TMEM9B	2.4181e-16	0.201595	0.153	0.132	4.37313e-12
[truncated: 4,665 more rows]

## Sheet: IP-InhibN
Gene	p_val	avg_log2FC	pct.1	pct.2	p_val_adj
DCX	0	0.894959	0.823	0.579	0
USP11	0	0.740198	0.41	0.23	0
CDK16	0	0.660454	0.303	0.165	0
DDX3Y	0	-16.096	0	0.095	0
IGFBP2	0	-0.713435	0.572	0.646	0
CHCHD2	0	-2.5978	0.028	0.091	0
UTY	0	-11.3299	0	0.043	0
USP9Y	0	-14.7744	0	0.037	0
EIF1AY	0	-10.6202	0	0.034	0
PSMD10	1.68788e-303	0.688992	0.253	0.132	3.05253e-299
KDM5D	5.03014e-300	-10.7249	0	0.029	9.09701e-296
ZNF229	3.45611e-244	-3.33514	0.005	0.038	6.25038e-240
NAP1L3	1.27423e-243	0.811177	0.189	0.095	2.30445e-239
AP1S2	3.11508e-215	0.823934	0.135	0.06	5.63361e-211
ALG13	6.67806e-213	0.548064	0.199	0.106	1.20773e-208
USP9X	1.2094e-188	0.658768	0.162	0.084	2.18719e-184
NKX6-2	4.34469e-188	1.47813	0.049	0.009	7.85737e-184
LRCH2	9.30733e-188	0.722462	0.139	0.067	1.68323e-183
SYAP1	1.48189e-184	0.760934	0.132	0.062	2.68e-180
MT-CO2	3.67679e-173	0.240389	0.782	0.679	6.64947e-169
HNRNPK	6.59946e-171	-1.16109	0.057	0.112	1.19351e-166
EEF1A2	4.52821e-169	0.343363	0.366	0.249	8.18927e-165
EGR1	7.74511e-167	-1.58034	0.023	0.063	1.4007e-162
CHL1	1.94621e-159	1.01036	0.063	0.02	3.51972e-155
CCND2	2.40605e-142	0.476645	0.255	0.168	4.35135e-138
PAK3	2.46531e-140	0.845564	0.085	0.037	4.45851e-136
ZNF558	3.94106e-139	-4.40479	0.001	0.017	7.1274e-135
BEX5	8.63831e-137	0.703846	0.089	0.04	1.56224e-132
MXRA7	2.252e-133	0.334841	0.254	0.167	4.07274e-129
SLITRK4	1.81699e-131	-2.82784	0.004	0.023	3.28603e-127
WSB1	3.65955e-131	-0.334083	0.728	0.732	6.6183e-127
RBBP7	1.03682e-130	0.550747	0.099	0.048	1.8751e-126
DKK3	3.36604e-128	0.414581	0.151	0.086	6.08748e-124
TMOD2	7.35231e-128	0.449721	0.177	0.108	1.32966e-123
TCEAL3	7.6965e-128	0.672875	0.09	0.042	1.39191e-123
DDIT4	1.53838e-127	0.326458	0.373	0.272	2.78216e-123
ZNF667	1.02442e-126	-2.46906	0.009	0.033	1.85267e-122
TXLNG	9.82813e-124	0.808009	0.078	0.034	1.77742e-119
SIX3	9.85352e-122	-1.01662	0.113	0.166	1.78201e-117
ATP1B1	9.58681e-121	0.4904	0.152	0.09	1.73377e-116
STMN2	1.42944e-116	0.288712	0.589	0.48	2.58515e-112
FAM162A	1.73913e-116	-0.947048	0.178	0.229	3.14522e-112
SLITRK2	5.93691e-116	-3.14964	0.003	0.02	1.07369e-111
SPOCK2	5.76335e-114	0.38042	0.165	0.101	1.0423e-109
MT-ND4	2.92662e-112	0.187174	0.722	0.622	5.29279e-108
AC099489.1	1.70664e-111	1.5926	0.026	0.004	3.08645e-107
HM13	8.21978e-111	0.307926	0.192	0.122	1.48655e-106
STMN4	3.15353e-110	0.273954	0.353	0.259	5.70315e-106
BRI3	1.05743e-109	0.262396	0.241	0.162	1.91236e-105
GNAQ	4.08088e-109	0.46511	0.153	0.094	7.38028e-105
EDNRB	2.31949e-108	0.7066	0.058	0.023	4.19479e-104
EEF1G	1.77467e-107	0.231836	0.47	0.362	3.20949e-103
UCHL1	5.51773e-107	0.224305	0.553	0.445	9.97882e-103
PSAT1	2.31495e-106	0.445287	0.158	0.098	4.18659e-102
ZNF608	5.34621e-106	0.528876	0.138	0.083	9.66862e-102
PCDHGA3	2.66897e-105	-3.0534	0.002	0.017	4.82683e-101
PPP1R1A	5.86372e-105	0.491045	0.117	0.067	1.06045e-100
SEZ6L	2.84019e-103	0.416706	0.101	0.054	5.13649e-99
BCL2L1	2.26527e-102	0.320401	0.147	0.089	4.09673e-98
SCG5	7.2148e-101	0.492914	0.132	0.079	1.3048e-96
SPECC1	2.08416e-99	0.311722	0.182	0.118	3.7692e-95
TSTD1	8.95466e-99	2.09986	0.024	0.004	1.61945e-94
ATP1A3	1.73046e-98	0.228412	0.323	0.234	3.12953e-94
SFRP1	5.52521e-98	0.605303	0.214	0.151	9.99235e-94
NSG1	6.89465e-94	0.24481	0.265	0.187	1.2469e-89
ENO2	1.02387e-93	-0.399348	0.581	0.585	1.85168e-89
TCEAL1	2.28697e-93	0.54711	0.081	0.041	4.13598e-89
CTPS2	5.47735e-91	0.5039	0.082	0.043	9.90579e-87
ZNF559	1.0603e-90	0.495412	0.103	0.059	1.91756e-86
ATP5F1B	3.38444e-90	0.205798	0.346	0.258	6.12076e-86
SLC25A1	6.46336e-90	0.455721	0.101	0.057	1.1689e-85
RND3	1.44308e-88	0.335774	0.172	0.114	2.60981e-84
ATP6V1A	1.72259e-85	0.244953	0.236	0.166	3.1153e-81
HSPD1	4.34232e-85	0.273842	0.176	0.117	7.85308e-81
LAPTM4B	5.19113e-85	0.256498	0.264	0.19	9.38816e-81
NLGN4X	2.42485e-84	0.721771	0.058	0.027	4.38534e-80
MAP1LC3B	1.50996e-83	0.204392	0.218	0.151	2.73077e-79
GPM6A	1.59683e-83	0.219843	0.359	0.273	2.88787e-79
SLC2A1	5.01135e-82	-0.820705	0.174	0.216	9.06302e-78
CLU	1.64691e-81	0.265174	0.177	0.119	2.97844e-77
PBX3	7.90959e-81	0.299339	0.353	0.274	1.43045e-76
RAB6B	8.12899e-81	0.219801	0.328	0.246	1.47013e-76
HMGN1	1.68663e-80	0.383016	0.174	0.119	3.05027e-76
KDM6A	2.81908e-80	0.818118	0.054	0.025	5.09831e-76
FTH1	3.83326e-79	0.172689	0.556	0.458	6.93246e-75
ARHGEF7	4.37134e-79	0.249069	0.194	0.133	7.90556e-75
SPON1	1.65242e-78	0.287569	0.069	0.035	2.98841e-74
CPNE1	2.22536e-78	0.225609	0.186	0.127	4.02456e-74
BRWD1	2.56061e-78	0.246806	0.181	0.123	4.63086e-74
PRNP	4.4775e-78	0.283555	0.139	0.089	8.09755e-74
ARRDC3	1.40709e-77	0.226681	0.387	0.302	2.54472e-73
ZNF248	2.17449e-77	-1.74982	0.019	0.041	3.93256e-73
NFE2L1	3.69839e-76	0.2131	0.225	0.159	6.68853e-72
MAP1LC3A	6.93055e-76	0.297999	0.128	0.082	1.25339e-71
ENPP2	1.64666e-75	0.453596	0.037	0.014	2.97798e-71
CDKN1A	3.45839e-74	0.14349	0.271	0.199	6.2545e-70
NKX6-1	5.91026e-74	0.64392	0.024	0.006	1.06887e-69
EFS	1.02894e-73	0.571501	0.064	0.033	1.86083e-69
FAM171B	1.42474e-73	0.359664	0.167	0.115	2.57664e-69
GPM6B	1.42502e-73	0.253641	0.216	0.156	2.57716e-69
NPTX2	1.46875e-73	0.461688	0.032	0.011	2.65623e-69
PSMD3	2.92602e-73	0.206214	0.215	0.153	5.2917e-69
TSC22D1	2.38008e-72	0.245858	0.19	0.133	4.30437e-68
NPDC1	3.22637e-72	0.227028	0.29	0.218	5.83488e-68
CTSB	5.85762e-72	0.220398	0.141	0.092	1.05935e-67
EEF2	5.92101e-72	0.17665	0.583	0.49	1.07082e-67
PEG10	6.64804e-72	-0.34688	0.45	0.485	1.2023e-67
ATG4A	8.25708e-72	0.650732	0.05	0.023	1.49329e-67
ZFP28	1.02026e-71	-1.6575	0.018	0.039	1.84514e-67
GDAP1L1	4.19885e-71	0.220548	0.223	0.161	7.59362e-67
TSPAN7	4.99386e-71	0.249968	0.184	0.128	9.0314e-67
LSM4	5.69504e-71	0.209851	0.188	0.131	1.02995e-66
PCBP4	2.04675e-70	0.155143	0.161	0.109	3.70155e-66
YBX1	2.12292e-70	0.199043	0.497	0.405	3.8393e-66
HIST1H4C	2.44457e-70	0.387264	0.11	0.069	4.42101e-66
ATP2B4	3.94756e-70	0.234589	0.119	0.075	7.13916e-66
RNF11	6.76068e-70	0.159859	0.211	0.149	1.22267e-65
SLITRK6	6.95354e-70	-1.08359	0.032	0.058	1.25755e-65
CNR1	1.46369e-69	0.425042	0.065	0.035	2.64708e-65
LRP11	1.26556e-68	0.336416	0.116	0.074	2.28876e-64
VAT1L	1.94565e-68	0.448436	0.084	0.05	3.51872e-64
GOLGA7	2.07526e-68	0.165147	0.164	0.112	3.75312e-64
BSCL2	2.58081e-68	0.163851	0.226	0.162	4.6674e-64
EFNB3	3.77868e-68	0.324256	0.139	0.092	6.83374e-64
CADM1	5.13062e-68	0.166463	0.279	0.208	9.27872e-64
HSP90AA1	9.78566e-68	0.159692	0.324	0.247	1.76974e-63
PDK3	2.51249e-67	0.437961	0.067	0.036	4.54384e-63
TRAP1	3.50081e-67	0.159021	0.182	0.127	6.33121e-63
MMD	5.78982e-67	0.345888	0.11	0.07	1.04709e-62
CLSTN3	1.00982e-66	0.213516	0.167	0.115	1.82626e-62
DCTN2	1.1748e-66	0.205019	0.238	0.175	2.12463e-62
CHRDL1	1.85108e-66	1.36526	0.038	0.016	3.34769e-62
ATP5MG	2.57437e-66	0.210965	0.196	0.14	4.65575e-62
CAMKV	3.31028e-66	0.340698	0.128	0.085	5.98664e-62
UBA52	5.3574e-66	0.161397	0.374	0.291	9.68886e-62
DTX4	5.89253e-66	0.244213	0.1	0.062	1.06566e-61
ADCY2	6.57453e-66	0.869808	0.042	0.019	1.189e-61
CDH20	7.03064e-66	1.08041	0.032	0.012	1.27149e-61
DDX24	1.76576e-65	0.121823	0.232	0.169	3.19338e-61
ZFAND3	2.95059e-65	0.236852	0.143	0.097	5.33615e-61
GAREM2	3.66878e-65	0.318961	0.075	0.042	6.63498e-61
SEC14L1	4.85067e-65	0.240288	0.171	0.12	8.77244e-61
GNG4	1.16189e-64	0.207313	0.214	0.156	2.10127e-60
DLX2	1.2515e-64	0.249477	0.233	0.174	2.26334e-60
PDE5A	2.81434e-64	-1.02582	0.043	0.07	5.08973e-60
DPYSL5	2.86875e-64	0.167242	0.351	0.272	5.18814e-60
GABRA2	4.39247e-64	0.305135	0.092	0.056	7.94379e-60
SEZ6	7.57629e-64	0.303021	0.124	0.082	1.37017e-59
CEBPG	7.66562e-64	0.24586	0.134	0.089	1.38633e-59
HIST2H2BE	7.87836e-64	0.795947	0.057	0.03	1.4248e-59
PEBP1	9.99e-64	0.15933	0.162	0.112	1.80669e-59
NME2	1.13499e-63	0.294581	0.122	0.081	2.05263e-59
MAP1B	2.90777e-63	0.176498	0.602	0.509	5.2587e-59
GRAMD1A	3.02287e-63	0.281102	0.14	0.095	5.46685e-59
SARAF	4.18366e-63	0.167338	0.201	0.144	7.56615e-59
STX16	6.00146e-63	0.230744	0.208	0.152	1.08536e-58
MT-ND4L	9.46939e-63	0.120879	0.736	0.653	1.71254e-58
LRP2	9.80649e-63	0.163762	0.042	0.019	1.7735e-58
NME1	2.99911e-62	0.157539	0.129	0.085	5.42389e-58
BBC3	3.30501e-62	0.290259	0.135	0.091	5.97711e-58
RNF157	3.78485e-62	0.261527	0.14	0.095	6.8449e-58
TRAPPC4	5.44681e-62	0.131904	0.185	0.131	9.85056e-58
CANX	5.6644e-62	0.165815	0.166	0.116	1.02441e-57
PRXL2A	2.01986e-61	0.112714	0.169	0.118	3.65293e-57
MEAF6	2.07624e-61	0.148867	0.236	0.174	3.75489e-57
OAZ1	2.12282e-61	0.152755	0.515	0.424	3.83912e-57
GRINA	2.40936e-61	0.119952	0.234	0.172	4.35732e-57
TMEFF1	2.5141e-61	0.149223	0.268	0.201	4.54676e-57
NDUFA4	2.78991e-61	0.134039	0.39	0.307	5.04554e-57
CLASP2	3.13823e-61	0.154103	0.349	0.272	5.67549e-57
NNAT	4.23502e-61	-0.174051	0.793	0.802	7.65903e-57
TSPYL1	5.10459e-61	0.185907	0.142	0.097	9.23166e-57
ATXN1	8.43209e-61	0.298788	0.146	0.101	1.52494e-56
SHTN1	1.26232e-60	0.388249	0.104	0.068	2.28291e-56
FZD7	1.36703e-60	0.663018	0.032	0.012	2.47228e-56
RHOB	1.69433e-60	0.216844	0.15	0.104	3.06419e-56
PEA15	1.75468e-60	0.208146	0.277	0.212	3.17334e-56
PLP1	4.83491e-60	0.397695	0.05	0.025	8.74393e-56
SQSTM1	5.04994e-60	0.161008	0.166	0.116	9.13282e-56
CAMK2N1	1.00242e-59	0.231781	0.177	0.127	1.81288e-55
PODXL2	1.07647e-59	0.157953	0.176	0.125	1.94679e-55
AHSA1	2.57982e-59	0.258147	0.115	0.076	4.6656e-55
GABARAP	3.33921e-59	0.152982	0.218	0.16	6.03896e-55
SMC1A	3.91323e-59	0.37773	0.159	0.114	7.07708e-55
CDKN2D	4.13229e-59	0.176931	0.184	0.132	7.47325e-55
SLC22A17	5.1022e-59	0.165087	0.231	0.171	9.22733e-55
LRP3	5.33995e-59	0.166467	0.151	0.104	9.6573e-55
RIOK3	6.47219e-59	0.168028	0.153	0.106	1.1705e-54
ZNF263	6.60456e-59	0.242345	0.12	0.08	1.19443e-54
FASN	9.33915e-59	0.198948	0.247	0.187	1.68898e-54
STMP1	1.53322e-58	0.187266	0.16	0.112	2.77283e-54
CNTN1	2.16906e-58	0.276826	0.163	0.116	3.92274e-54
SOX8	2.81159e-58	0.476177	0.047	0.023	5.08476e-54
TNFRSF10B	3.28771e-58	0.120648	0.165	0.116	5.94583e-54
MTSS2	3.39415e-58	0.213999	0.148	0.103	6.13832e-54
CASK	4.92135e-58	0.177253	0.218	0.161	8.90026e-54
NMNAT2	6.07426e-58	0.192017	0.184	0.133	1.09853e-53
SPAG9	7.64497e-58	0.140224	0.314	0.243	1.38259e-53
RAB3A	9.39043e-58	0.191753	0.196	0.143	1.69826e-53
SMS	1.80757e-57	0.219201	0.221	0.165	3.26899e-53
SELENOW	2.94358e-57	0.120938	0.287	0.218	5.32346e-53
DYM	3.06587e-57	0.172064	0.2	0.145	5.54463e-53
PSMF1	4.59721e-57	0.170723	0.181	0.13	8.31405e-53
SQLE	5.7321e-57	0.261892	0.166	0.119	1.03665e-52
MYO16	5.97203e-57	0.648622	0.051	0.027	1.08004e-52
DYNLRB1	8.53403e-57	0.138891	0.234	0.174	1.54338e-52
FEZ1	1.01306e-56	0.138892	0.307	0.237	1.83211e-52
ANKRD46	1.7228e-56	0.232196	0.156	0.11	3.11568e-52
HK2	2.15865e-56	-0.808834	0.158	0.19	3.90392e-52
PARP6	2.43901e-56	0.172021	0.147	0.102	4.41096e-52
GNAL	2.82536e-56	0.611521	0.057	0.032	5.10967e-52
NRDC	3.00901e-56	0.331245	0.109	0.072	5.4418e-52
SIRT2	3.50445e-56	0.229921	0.108	0.071	6.33779e-52
APOE	3.59425e-56	0.421685	0.073	0.044	6.5002e-52
ATP6V0C	4.41698e-56	0.170713	0.151	0.106	7.9881e-52
HIPK3	5.85328e-56	0.168462	0.216	0.16	1.05857e-51
PIK3R2	6.37875e-56	0.193576	0.147	0.103	1.1536e-51
PPDPF	6.56991e-56	0.143925	0.422	0.339	1.18817e-51
ARPC2	1.0614e-55	0.141739	0.128	0.087	1.91954e-51
COX6A1	1.1339e-55	0.111347	0.197	0.143	2.05065e-51
PRPF19	1.16923e-55	0.164488	0.17	0.122	2.11455e-51
KLHL24	1.30686e-55	0.192871	0.143	0.099	2.36345e-51
SCRIB	2.1443e-55	0.21546	0.113	0.075	3.87796e-51
GOT2	2.24148e-55	0.200213	0.131	0.09	4.05372e-51
MTCH1	2.43995e-55	0.140464	0.2	0.147	4.41266e-51
EIF1B	2.8466e-55	0.112447	0.36	0.283	5.14808e-51
ATPAF1	4.8678e-55	0.242596	0.096	0.061	8.80342e-51
WLS	5.94909e-55	0.315094	0.132	0.092	1.07589e-50
PACS1	9.78783e-55	0.317218	0.097	0.063	1.77013e-50
OPTN	1.05093e-54	0.269671	0.114	0.076	1.90061e-50
AKT1	1.06344e-54	0.121565	0.189	0.137	1.92324e-50
IDS	1.20996e-54	0.146526	0.152	0.107	2.18822e-50
ZMAT3	1.40584e-54	0.210274	0.103	0.068	2.54246e-50
PRKACB	1.87411e-54	0.234526	0.148	0.104	3.38932e-50
SAT1	3.91884e-54	0.230005	0.107	0.071	7.08723e-50
ARPP19	4.47398e-54	0.113458	0.275	0.209	8.0912e-50
KPNA1	4.62938e-54	0.171133	0.174	0.126	8.37224e-50
PSMB2	4.64039e-54	0.136155	0.191	0.138	8.39215e-50
COX4I1	5.63503e-54	0.229229	0.126	0.086	1.0191e-49
RCN2	6.40644e-54	0.143717	0.123	0.083	1.15861e-49
FRMD4A	6.47079e-54	0.287489	0.106	0.07	1.17024e-49
CDC42BPB	6.55064e-54	0.172156	0.156	0.111	1.18468e-49
PCSK1N	7.31608e-54	0.121098	0.316	0.244	1.32311e-49
TNPO3	9.63469e-54	0.176355	0.194	0.143	1.74243e-49
ATP6AP1	9.91538e-54	0.132613	0.242	0.182	1.7932e-49
NADK2	1.38256e-53	0.188689	0.116	0.078	2.50035e-49
CELF1	1.66214e-53	0.141062	0.246	0.186	3.00598e-49
CALB2	1.72408e-53	0.961662	0.029	0.012	3.118e-49
FSCN1	1.9772e-53	0.149813	0.174	0.125	3.57577e-49
SPATA18	2.75742e-53	1.28768	0.02	0.006	4.98679e-49
CORO7	2.92316e-53	0.416318	0.073	0.045	5.28653e-49
EI24	2.99306e-53	0.101536	0.132	0.091	5.41294e-49
DNAJB1	3.43927e-53	0.366694	0.086	0.054	6.21991e-49
PAX6	3.65048e-53	0.592578	0.074	0.046	6.60189e-49
SLC7A11	3.66984e-53	0.401849	0.046	0.024	6.6369e-49
POR	3.67803e-53	0.462972	0.052	0.028	6.65171e-49
H1F0	5.79057e-53	0.188715	0.148	0.104	1.04722e-48
APP	6.08504e-53	0.115044	0.404	0.323	1.10048e-48
PPIL3	6.91122e-53	0.416959	0.055	0.03	1.24989e-48
ACTG1	9.40831e-53	0.147308	0.693	0.611	1.70149e-48
SULF1	9.42831e-53	0.34528	0.037	0.017	1.70511e-48
NKX2-2	9.5531e-53	1.44647	0.012	0.002	1.72768e-48
MDGA1	1.18878e-52	1.16062	0.028	0.011	2.14991e-48
FARSB	1.2418e-52	0.156292	0.184	0.134	2.24579e-48
TMEM59L	1.40473e-52	0.14063	0.298	0.231	2.54046e-48
BTBD2	1.46706e-52	0.141879	0.24	0.183	2.65318e-48
VPS26B	2.19684e-52	0.227226	0.14	0.099	3.97298e-48
GHITM	2.39378e-52	0.236246	0.104	0.069	4.32915e-48
FAR1	2.42347e-52	0.178697	0.135	0.094	4.38284e-48
UQCRB	2.47463e-52	0.21854	0.13	0.09	4.47537e-48
ZNF285	2.83956e-52	-1.6208	0.024	0.043	5.13534e-48
SLC7A5	2.95188e-52	0.214695	0.111	0.074	5.33848e-48
PCCA	7.53591e-52	0.243906	0.086	0.055	1.36287e-47
CALM2	8.66345e-52	0.159594	0.151	0.107	1.56678e-47
WASF3	1.08505e-51	0.3427	0.077	0.048	1.96232e-47
DYNC1H1	1.10798e-51	0.141898	0.151	0.107	2.00377e-47
GDPD2	1.22307e-51	0.831321	0.02	0.006	2.21192e-47
PPP2R2C	1.23304e-51	0.283598	0.079	0.049	2.22995e-47
ARX	1.23617e-51	0.288739	0.139	0.099	2.23562e-47
BSG	1.25375e-51	0.154172	0.154	0.11	2.2674e-47
NFATC3	1.59176e-51	0.24111	0.124	0.086	2.87869e-47
ASAH1	1.67564e-51	0.305054	0.067	0.04	3.0304e-47
SLC6A9	2.13932e-51	0.470193	0.036	0.017	3.86895e-47
SLC1A4	2.31565e-51	0.200077	0.083	0.052	4.18785e-47
DCLK1	2.60096e-51	0.210608	0.243	0.188	4.70383e-47
ACOT7	3.23724e-51	0.249188	0.089	0.058	5.85454e-47
PRDX4	3.31114e-51	0.275819	0.119	0.082	5.98819e-47
OLFM1	3.44285e-51	0.126215	0.21	0.157	6.22639e-47
DNER	4.23078e-51	0.157906	0.271	0.211	7.65136e-47
VGF	4.60047e-51	-0.741769	0.112	0.143	8.31995e-47
CDCA7L	6.18571e-51	0.504042	0.084	0.054	1.11869e-46
NCKAP1	6.54771e-51	0.177012	0.119	0.081	1.18415e-46
GALNT13	7.71033e-51	0.647568	0.054	0.031	1.39441e-46
TOMM7	8.08689e-51	0.196158	0.14	0.099	1.46251e-46
NUDC	9.29058e-51	0.120699	0.149	0.106	1.6802e-46
MSN	1.04467e-50	0.414359	0.062	0.036	1.88929e-46
LRPAP1	1.11022e-50	0.138508	0.154	0.11	2.00784e-46
PUF60	1.14236e-50	0.124673	0.184	0.135	2.06595e-46
TMSB4X	1.36228e-50	0.111907	0.743	0.655	2.46368e-46
DEAF1	1.45409e-50	0.141633	0.125	0.086	2.62973e-46
SF3B3	1.60183e-50	0.149753	0.178	0.13	2.89691e-46
AKIRIN1	2.0396e-50	0.128798	0.191	0.141	3.68862e-46
CCNI	2.25684e-50	0.131082	0.555	0.468	4.08149e-46
GARS	3.92393e-50	0.355593	0.081	0.052	7.09644e-46
SCD5	3.96975e-50	0.143621	0.148	0.106	7.1793e-46
MDH2	4.09011e-50	0.194794	0.126	0.087	7.39696e-46
SULF2	4.75456e-50	0.257105	0.047	0.025	8.59863e-46
GAD1	6.04935e-50	0.151312	0.271	0.211	1.09403e-45
CPD	6.87162e-50	0.192924	0.087	0.055	1.24273e-45
FAM199X	7.25139e-50	0.303654	0.127	0.089	1.31141e-45
AKAP8L	7.53717e-50	0.164165	0.201	0.151	1.3631e-45
CAPNS1	8.54502e-50	0.169852	0.114	0.077	1.54537e-45
LSM7	9.48568e-50	0.103888	0.239	0.181	1.71548e-45
VAT1	9.74522e-50	0.142684	0.122	0.084	1.76242e-45
HMGCR	9.99495e-50	0.201757	0.22	0.168	1.80759e-45
ERBB4	1.15401e-49	0.45213	0.074	0.046	2.08702e-45
EDIL3	1.25393e-49	0.195637	0.053	0.029	2.26773e-45
S100A16	1.37444e-49	0.505381	0.018	0.005	2.48567e-45
SLC3A2	1.38173e-49	0.104296	0.273	0.21	2.49886e-45
SEC61A2	1.44237e-49	0.239274	0.082	0.052	2.60852e-45
SH3BGRL3	1.76945e-49	0.138361	0.199	0.148	3.20005e-45
AHCYL1	1.79856e-49	0.108212	0.153	0.11	3.25269e-45
ACSL4	2.14507e-49	0.22906	0.101	0.068	3.87936e-45
CACNG7	2.33976e-49	0.181822	0.159	0.115	4.23145e-45
WNK2	2.52884e-49	0.141952	0.142	0.101	4.57341e-45
CTNNA1	2.79312e-49	0.159017	0.116	0.08	5.05137e-45
RMND5A	4.19809e-49	0.104205	0.174	0.128	7.59225e-45
ARHGEF4	4.25244e-49	0.146501	0.071	0.043	7.69054e-45
PINK1	4.48012e-49	0.249657	0.092	0.06	8.1023e-45
CNBP	4.97054e-49	0.117315	0.278	0.216	8.98921e-45
CTNND2	5.34261e-49	0.244718	0.144	0.103	9.66212e-45
VARS	5.85897e-49	0.14881	0.134	0.095	1.0596e-44
ATP1B2	5.95709e-49	0.145891	0.224	0.169	1.07734e-44
ARMCX1	6.55904e-49	0.14801	0.13	0.09	1.1862e-44
CACNG4	7.12583e-49	0.163874	0.14	0.1	1.28871e-44
PSMD1	7.29273e-49	0.10975	0.145	0.103	1.31889e-44
BANF1	7.47775e-49	0.13054	0.147	0.105	1.35235e-44
KIF21B	7.81691e-49	0.108707	0.217	0.164	1.41369e-44
JUND	8.06991e-49	0.103963	0.334	0.263	1.45944e-44
BIN1	9.27605e-49	0.148624	0.156	0.112	1.67757e-44
NECAB2	1.00054e-48	0.307801	0.04	0.02	1.80947e-44
RTN1	1.01883e-48	0.165193	0.392	0.32	1.84255e-44
SCARB2	1.11156e-48	0.108293	0.266	0.205	2.01026e-44
ZYG11B	1.16431e-48	0.194094	0.121	0.084	2.10565e-44
SPOCK1	1.28511e-48	0.614354	0.036	0.017	2.32412e-44
HSPA8	1.74504e-48	0.131043	0.356	0.283	3.1559e-44
PRKCA	1.87999e-48	0.390406	0.063	0.038	3.39997e-44
METRN	3.00251e-48	0.100817	0.08	0.051	5.43004e-44
HIST3H2A	3.20651e-48	0.920902	0.028	0.012	5.79898e-44
SPINK5	3.73404e-48	1.83493	0.015	0.004	6.75301e-44
NRGN	3.86503e-48	-0.897313	0.041	0.064	6.98992e-44
NRBP2	4.11898e-48	0.129937	0.096	0.063	7.44918e-44
VAMP2	4.90489e-48	0.127761	0.379	0.306	8.8705e-44
SF3A2	5.03429e-48	0.162416	0.114	0.078	9.10452e-44
TMTC2	6.18529e-48	0.174403	0.105	0.071	1.11861e-43
ATP6V1G1	6.99419e-48	0.153817	0.127	0.089	1.2649e-43
RIF1	9.37114e-48	0.345807	0.079	0.051	1.69477e-43
ITFG1	9.53974e-48	0.149965	0.129	0.091	1.72526e-43
SAMM50	1.06651e-47	0.153681	0.084	0.054	1.92878e-43
ELAVL2	1.07226e-47	0.149146	0.136	0.096	1.93918e-43
ZNF471	1.12447e-47	-2.37859	0.005	0.015	2.0336e-43
LRFN4	1.14283e-47	0.252274	0.109	0.075	2.06681e-43
LAMTOR2	1.46725e-47	0.189303	0.084	0.054	2.65352e-43
UBR4	1.4717e-47	0.162359	0.143	0.102	2.66157e-43
EIF1	1.51139e-47	0.113237	0.389	0.313	2.73335e-43
ALDH2	1.53602e-47	0.199159	0.109	0.075	2.77789e-43
YARS	1.56313e-47	0.207659	0.075	0.047	2.82692e-43
NTN1	2.67893e-47	-0.127582	0.083	0.054	4.84484e-43
KIAA1324L	3.39026e-47	0.255904	0.097	0.065	6.13129e-43
FAT1	3.4103e-47	0.266629	0.104	0.071	6.16753e-43
L1CAM	3.47397e-47	0.163578	0.156	0.113	6.28268e-43
C12orf75	4.04908e-47	0.27907	0.061	0.036	7.32275e-43
SARS	4.66221e-47	0.23457	0.09	0.06	8.43161e-43
VDAC3	4.91339e-47	0.165457	0.176	0.13	8.88586e-43
SLIT1	5.29809e-47	-0.181816	0.138	0.098	9.5816e-43
DGUOK	6.81845e-47	0.111561	0.237	0.181	1.23312e-42
CUL3	8.14495e-47	0.129444	0.172	0.127	1.47301e-42
ZEB2	9.87177e-47	0.392064	0.077	0.049	1.78531e-42
TOMM40	1.20039e-46	0.160757	0.117	0.081	2.17091e-42
SMDT1	1.21723e-46	0.202947	0.119	0.084	2.20136e-42
REEP5	1.23171e-46	0.162526	0.102	0.069	2.22754e-42
CTSF	1.37469e-46	0.331765	0.031	0.014	2.48612e-42
PITRM1	1.58862e-46	0.183726	0.104	0.07	2.87301e-42
GRK2	1.7194e-46	0.183215	0.125	0.088	3.10953e-42
GNAI2	1.89213e-46	0.200127	0.142	0.103	3.42193e-42
SLC1A2	2.10656e-46	0.331514	0.089	0.059	3.80971e-42
NARS2	2.468e-46	0.216264	0.084	0.055	4.46338e-42
GNAZ	2.71558e-46	0.250857	0.094	0.063	4.91112e-42
MMP15	2.76027e-46	0.213527	0.077	0.049	4.99194e-42
RAC1	3.30679e-46	0.134881	0.18	0.133	5.98033e-42
PHLDB1	4.22483e-46	0.168359	0.114	0.079	7.6406e-42
H1FX	4.77718e-46	0.132498	0.178	0.132	8.63952e-42
NEIL2	5.09171e-46	0.236369	0.069	0.043	9.20836e-42
MAP4K4	5.52726e-46	0.123774	0.276	0.216	9.99604e-42
PRKX	6.60012e-46	0.729735	0.025	0.01	1.19363e-41
ADCYAP1R1	6.61511e-46	0.167687	0.055	0.031	1.19634e-41
GNB2	7.59691e-46	0.102936	0.199	0.149	1.3739e-41
CYFIP2	7.70778e-46	0.140176	0.191	0.143	1.39395e-41
YWHAE	8.81103e-46	0.1067	0.31	0.245	1.59347e-41
INAFM1	9.9525e-46	0.141235	0.114	0.079	1.79991e-41
JPT1	1.16392e-45	0.180863	0.169	0.126	2.10495e-41
CACNA2D1	1.23489e-45	1.01119	0.03	0.014	2.23329e-41
COX16	1.2964e-45	0.105564	0.168	0.123	2.34455e-41
TTC17	1.3452e-45	0.154968	0.137	0.098	2.4328e-41
VANGL2	1.41008e-45	0.243325	0.085	0.056	2.55013e-41
LENG8	2.09738e-45	0.118446	0.425	0.346	3.79311e-41
ABHD17B	2.25964e-45	0.267202	0.072	0.045	4.08656e-41
KDM5C	2.35897e-45	0.268723	0.115	0.081	4.2662e-41
CAPRIN1	2.54757e-45	0.152213	0.139	0.1	4.60729e-41
TUB	3.45565e-45	0.189566	0.108	0.075	6.24954e-41
PCYT1B	3.8495e-45	0.762693	0.037	0.019	6.96182e-41
LCMT1	4.26904e-45	0.122793	0.134	0.095	7.72056e-41
CLTB	6.22254e-45	0.136627	0.126	0.089	1.12535e-40
PLRG1	7.31723e-45	0.20382	0.098	0.066	1.32332e-40
FXYD6	8.91343e-45	0.119288	0.479	0.398	1.61199e-40
SESN2	1.03615e-44	0.302936	0.071	0.045	1.87387e-40
SHISA4	1.16309e-44	0.495442	0.031	0.015	2.10345e-40
CACNA1H	1.22052e-44	0.195387	0.143	0.104	2.20732e-40
GIT1	1.40167e-44	0.334672	0.059	0.036	2.53492e-40
MAPK1	2.6039e-44	0.161434	0.13	0.092	4.70916e-40
FUT9	2.95724e-44	0.36643	0.142	0.105	5.34817e-40
GABBR1	3.06052e-44	0.134085	0.233	0.18	5.53496e-40
EIF4A2	4.22856e-44	0.123094	0.183	0.137	7.64735e-40
GRIA2	4.54776e-44	0.171837	0.315	0.254	8.22462e-40
LMBR1	4.69309e-44	0.118717	0.13	0.093	8.48745e-40
CD47	6.16675e-44	0.221128	0.178	0.135	1.11526e-39
ATP5F1C	6.68633e-44	0.173853	0.133	0.096	1.20922e-39
GPRIN2	6.69889e-44	0.456677	0.031	0.015	1.21149e-39
EIF3D	8.53093e-44	0.231255	0.09	0.06	1.54282e-39
PCDH11X	9.32719e-44	1.35212	0.02	0.008	1.68682e-39
SLC26A11	1.22358e-43	0.292429	0.053	0.031	2.21284e-39
ID2	1.29518e-43	0.388512	0.04	0.021	2.34233e-39
GNS	1.31666e-43	0.10462	0.087	0.058	2.38119e-39
SRRM1	1.82056e-43	0.109044	0.147	0.107	3.29248e-39
NDUFA7	1.88162e-43	0.112789	0.117	0.082	3.40291e-39
SP8	2.09705e-43	0.436739	0.094	0.064	3.79251e-39
ABCA2	2.10575e-43	0.220514	0.091	0.061	3.80825e-39
NAP1L5	2.3094e-43	0.240733	0.095	0.065	4.17655e-39
LPCAT1	2.39936e-43	0.144449	0.103	0.071	4.33924e-39
MLC1	2.41977e-43	0.353807	0.022	0.009	4.37616e-39
CDC34	2.44124e-43	0.10635	0.135	0.097	4.41497e-39
ATF5	2.65098e-43	0.198407	0.089	0.06	4.79429e-39
RAB2A	2.88549e-43	0.109502	0.235	0.181	5.21841e-39
CEBPZ	3.07154e-43	0.201248	0.122	0.087	5.55487e-39
MEGF8	3.16488e-43	0.167854	0.106	0.073	5.72369e-39
THRAP3	3.64691e-43	0.12333	0.17	0.127	6.59544e-39
RND2	4.07968e-43	0.153149	0.084	0.055	7.37811e-39
DLX5	4.78409e-43	0.185258	0.174	0.132	8.65204e-39
TCF4	4.92742e-43	0.335914	0.076	0.05	8.91123e-39
CAMK2N2	5.21785e-43	0.151507	0.125	0.089	9.43648e-39
WSB2	5.59032e-43	0.13803	0.177	0.133	1.01101e-38
DDAH1	5.88715e-43	0.201908	0.116	0.082	1.06469e-38
AEN	6.54588e-43	0.217907	0.101	0.069	1.18382e-38
TMEM256	6.81211e-43	0.144642	0.111	0.078	1.23197e-38
EIF4EBP1	7.67191e-43	0.172139	0.117	0.083	1.38746e-38
AKR1B1	8.00533e-43	0.124355	0.154	0.113	1.44776e-38
CCPG1	8.27784e-43	0.160328	0.136	0.098	1.49705e-38
LRCH4	1.0524e-42	0.18132	0.127	0.091	1.90327e-38
NDUFB5	1.12343e-42	0.13093	0.152	0.111	2.03172e-38
EIF2A	1.16135e-42	0.112023	0.144	0.105	2.1003e-38
PLS3	1.17524e-42	0.445616	0.032	0.015	2.12542e-38
CHMP5	1.22695e-42	0.113681	0.133	0.096	2.21894e-38
AMOT	1.36721e-42	0.387388	0.04	0.021	2.4726e-38
LRIF1	1.50444e-42	0.163164	0.103	0.071	2.72078e-38
PNMA1	1.55851e-42	0.11093	0.173	0.129	2.81857e-38
RUNDC3A	1.57519e-42	0.137511	0.14	0.102	2.84873e-38
ZNF680	1.63487e-42	0.127804	0.078	0.051	2.95666e-38
SOGA1	2.20653e-42	0.146009	0.172	0.13	3.99051e-38
NEO1	2.51012e-42	0.110845	0.136	0.098	4.53955e-38
RASA3	2.6058e-42	0.379555	0.052	0.03	4.71259e-38
GPC3	3.72605e-42	-1.99325	0.007	0.017	6.73855e-38
FAM222A	3.89043e-42	0.185859	0.082	0.054	7.03584e-38
ZNF483	4.48567e-42	0.208334	0.077	0.05	8.11233e-38
INSYN1	4.78059e-42	0.215968	0.072	0.046	8.64569e-38
PTPRD	5.65641e-42	0.334836	0.082	0.055	1.02296e-37
EIF2S1	6.36605e-42	0.131592	0.129	0.093	1.1513e-37
NAPA	7.0091e-42	0.100213	0.17	0.127	1.2676e-37
GYG2	7.10789e-42	0.591727	0.029	0.013	1.28546e-37
CCT4	1.05483e-41	0.188518	0.112	0.079	1.90766e-37
AP2A2	1.18165e-41	0.131864	0.149	0.11	2.13701e-37
SLC25A23	1.81589e-41	0.175169	0.132	0.096	3.28404e-37
TUBB2A	2.07052e-41	0.11385	0.403	0.33	3.74453e-37
TTYH2	2.21312e-41	0.365538	0.024	0.01	4.00242e-37
SCRN1	2.25652e-41	0.13674	0.135	0.098	4.08092e-37
ZYX	2.27299e-41	0.122162	0.141	0.103	4.11071e-37
AMER2	2.50559e-41	0.242065	0.087	0.059	4.53135e-37
CSNK1D	2.60895e-41	0.126975	0.16	0.119	4.71828e-37
FAM181B	2.8205e-41	0.402224	0.045	0.025	5.10088e-37
NTM	2.86102e-41	0.634753	0.035	0.018	5.17416e-37
PALM	3.02156e-41	0.173191	0.113	0.079	5.46448e-37
MGAT4B	3.54481e-41	0.241711	0.072	0.046	6.4108e-37
FLRT3	4.08894e-41	0.193336	0.024	0.01	7.39484e-37
INTS11	4.32711e-41	0.116626	0.148	0.109	7.82557e-37
TUSC1	4.5971e-41	1.68561	0.012	0.003	8.31386e-37
CHERP	4.61359e-41	0.144004	0.154	0.115	8.34367e-37
JUN	5.12673e-41	0.226303	0.145	0.108	9.2717e-37
TOMM70	5.31639e-41	0.152757	0.142	0.104	9.61469e-37
CADPS	5.53618e-41	0.107122	0.146	0.107	1.00122e-36
MBOAT7	6.03828e-41	0.148684	0.087	0.059	1.09202e-36
TRAPPC11	6.24303e-41	0.135208	0.122	0.087	1.12905e-36
RCN1	1.02692e-40	0.16578	0.11	0.078	1.85719e-36
ZFR	1.53427e-40	0.109263	0.146	0.107	2.77473e-36
FAM3C	1.55689e-40	0.133088	0.173	0.13	2.81563e-36
HNRNPC	1.93983e-40	0.190636	0.145	0.108	3.50819e-36
XBP1	2.17324e-40	0.134237	0.094	0.064	3.93031e-36
MGRN1	2.19056e-40	0.135223	0.128	0.093	3.96163e-36
GAS7	2.27388e-40	0.172561	0.106	0.074	4.1123e-36
ETV1	2.56162e-40	0.20629	0.075	0.049	4.63269e-36
APTX	2.80364e-40	0.16405	0.08	0.053	5.07038e-36
RAB4A	2.98238e-40	0.18484	0.095	0.065	5.39364e-36
ZNF177	3.00893e-40	0.724359	0.033	0.016	5.44165e-36
DNAJC10	3.75021e-40	0.105545	0.126	0.091	6.78225e-36
ATIC	4.07506e-40	0.293903	0.054	0.033	7.36974e-36
NDUFC1	4.31014e-40	0.108887	0.121	0.087	7.79488e-36
MAPK8	5.30284e-40	0.124929	0.16	0.12	9.59018e-36
TMEM192	5.66143e-40	0.345413	0.049	0.029	1.02387e-35
SGTB	5.69091e-40	0.215891	0.058	0.036	1.0292e-35
PAM16	5.84655e-40	0.124472	0.128	0.092	1.05735e-35
KLC2	7.47755e-40	0.131892	0.112	0.079	1.35231e-35
SORT1	8.66395e-40	0.132148	0.106	0.074	1.56688e-35
KIF1B	1.18174e-39	0.100277	0.271	0.215	2.13718e-35
SLC1A3	1.26576e-39	0.397007	0.078	0.052	2.28913e-35
CIB1	1.36791e-39	0.1531	0.087	0.059	2.47386e-35
RFX4	1.65082e-39	0.247094	0.037	0.02	2.98551e-35
PER1	1.80256e-39	0.127755	0.131	0.095	3.25993e-35
DDX3X	1.89635e-39	0.337842	0.075	0.05	3.42955e-35
BAZ1B	2.11011e-39	0.129683	0.146	0.108	3.81613e-35
CPLX2	2.32564e-39	0.287451	0.103	0.073	4.20591e-35
FAIM2	2.69265e-39	0.201147	0.088	0.06	4.86965e-35
TRIR	2.77677e-39	0.131846	0.176	0.133	5.02179e-35
MYL6B	2.84598e-39	0.13595	0.133	0.097	5.14696e-35
AKAP11	3.08944e-39	0.127822	0.137	0.1	5.58726e-35
PRKRA	3.79691e-39	0.104652	0.12	0.086	6.86672e-35
YPEL3	3.82641e-39	0.168278	0.104	0.073	6.92007e-35
ATP5MC2	4.06834e-39	0.210803	0.089	0.061	7.3576e-35
ATP8A1	4.49002e-39	0.511	0.045	0.026	8.1202e-35
MINK1	5.35581e-39	0.122466	0.148	0.11	9.68598e-35
CRTAP	7.65286e-39	0.269604	0.073	0.048	1.38402e-34
ASS1	7.75498e-39	0.436196	0.042	0.024	1.40249e-34
EPB41L3	7.8273e-39	0.31276	0.058	0.036	1.41557e-34
TMEM35A	8.79949e-39	0.121551	0.173	0.132	1.59139e-34
DNAJA3	1.02771e-38	0.157762	0.099	0.069	1.85862e-34
SIPA1L2	1.12754e-38	0.351028	0.076	0.05	2.03916e-34
STMN3	1.14194e-38	0.128351	0.157	0.118	2.06519e-34
VCAM1	1.24227e-38	0.112854	0.028	0.013	2.24665e-34
SHISA5	1.39288e-38	0.111064	0.154	0.115	2.51902e-34
SHMT2	1.45664e-38	0.296709	0.057	0.036	2.63434e-34
TAGLN3	1.68981e-38	0.108392	0.153	0.114	3.05602e-34
ZNF704	1.72054e-38	0.310525	0.066	0.043	3.11159e-34
PTPRU	1.76623e-38	0.312412	0.064	0.041	3.19422e-34
SMIM29	2.07701e-38	0.231286	0.072	0.047	3.75627e-34
NF2	2.34435e-38	0.260052	0.076	0.051	4.23976e-34
CASP3	2.51689e-38	0.15713	0.11	0.078	4.55179e-34
NTRK2	2.59793e-38	0.130762	0.157	0.119	4.69836e-34
CAMK2A	2.7584e-38	0.45209	0.053	0.032	4.98856e-34
ARL8A	2.94407e-38	0.10711	0.079	0.053	5.32435e-34
S100A6	3.02254e-38	0.662106	0.027	0.012	5.46627e-34
B4GALT5	3.04805e-38	0.194049	0.096	0.067	5.51241e-34
MAPK8IP3	3.04999e-38	0.106198	0.131	0.096	5.51591e-34
DENND2A	3.17048e-38	0.225613	0.07	0.046	5.73382e-34
CARHSP1	3.2552e-38	0.112238	0.148	0.11	5.88702e-34
NOC4L	3.29014e-38	0.172625	0.078	0.052	5.95023e-34
CAPN5	3.34621e-38	0.346841	0.068	0.044	6.05162e-34
CPLANE1	3.67774e-38	0.147032	0.101	0.071	6.65119e-34
PPP2R2B	3.74341e-38	0.196307	0.084	0.058	6.76996e-34
RAB10	3.77341e-38	0.135503	0.132	0.097	6.8242e-34
SHROOM2	3.85075e-38	0.505104	0.059	0.038	6.96409e-34
PPP4R4	3.89122e-38	0.766431	0.028	0.014	7.03727e-34
COX7A2	4.02046e-38	0.177515	0.095	0.066	7.27099e-34
PI4KA	4.48465e-38	0.197859	0.1	0.07	8.11049e-34
FOXJ3	4.55575e-38	0.126664	0.105	0.074	8.23908e-34
CLK1	4.71214e-38	0.140409	0.173	0.132	8.52191e-34
TM2D3	5.23404e-38	0.242401	0.104	0.074	9.46576e-34
STRAP	5.33626e-38	0.104358	0.155	0.116	9.65062e-34
COX5B	5.50524e-38	0.120677	0.087	0.06	9.95623e-34
EFR3B	5.59202e-38	0.122402	0.075	0.05	1.01132e-33
CMTM4	5.96404e-38	0.259749	0.074	0.05	1.0786e-33
CDK20	5.97697e-38	0.100433	0.109	0.077	1.08093e-33
SNN	6.03845e-38	0.140593	0.1	0.07	1.09205e-33
PLAA	6.9644e-38	0.104606	0.101	0.071	1.25951e-33
NENF	8.35844e-38	0.227319	0.062	0.039	1.51162e-33
DCXR	1.10261e-37	0.104316	0.096	0.067	1.99408e-33
RBM5	1.21284e-37	0.109808	0.237	0.187	2.19342e-33
TXNL1	1.33906e-37	0.130231	0.195	0.151	2.42169e-33
KSR1	1.38859e-37	0.162024	0.09	0.062	2.51127e-33
PA2G4	1.42822e-37	0.15135	0.125	0.092	2.58294e-33
FDFT1	1.55194e-37	0.215526	0.178	0.138	2.80669e-33
CDK14	1.58155e-37	0.254404	0.078	0.052	2.86023e-33
DYNC1I1	1.85372e-37	0.426312	0.057	0.035	3.35245e-33
CTSL	1.95784e-37	0.274545	0.056	0.035	3.54075e-33
NIPA1	2.13468e-37	0.233282	0.062	0.04	3.86056e-33
MAN2A2	2.53142e-37	0.132201	0.085	0.058	4.57807e-33
CRYL1	2.79296e-37	0.392891	0.047	0.028	5.05107e-33
RHOC	2.84607e-37	0.135539	0.062	0.04	5.14712e-33
SF3B2	3.10225e-37	0.1186	0.109	0.078	5.61043e-33
TMSB15B	3.2246e-37	0.264602	0.06	0.038	5.8317e-33
SAT2	3.25002e-37	0.11218	0.106	0.076	5.87765e-33
GPRASP1	3.27507e-37	0.183423	0.09	0.063	5.92297e-33
STRBP	3.49799e-37	0.137965	0.102	0.072	6.32611e-33
PRKAR2A	3.80071e-37	0.151337	0.093	0.065	6.87359e-33
BAG6	3.93138e-37	0.152615	0.124	0.091	7.1099e-33
TRPC4AP	4.09591e-37	0.123701	0.144	0.108	7.40745e-33
UGGT1	4.16902e-37	0.135025	0.096	0.067	7.53967e-33
CELSR2	4.18989e-37	0.104545	0.079	0.053	7.57742e-33
LSS	6.89993e-37	0.151745	0.139	0.104	1.24785e-32
MMP24	7.00903e-37	0.204649	0.099	0.07	1.26758e-32
PTPRA	8.31711e-37	0.101796	0.123	0.089	1.50415e-32
TTC9B	9.22118e-37	0.193499	0.11	0.079	1.66765e-32
TBR1	9.7975e-37	1.56949	0.012	0.003	1.77188e-32
MORN4	9.87474e-37	0.127989	0.123	0.09	1.78585e-32
PRMT1	1.08592e-36	0.116466	0.171	0.131	1.96388e-32
STARD3	1.09753e-36	0.115426	0.124	0.091	1.98489e-32
MAGI1	1.14402e-36	0.157791	0.099	0.07	2.06895e-32
PCDH19	1.17769e-36	0.312226	0.04	0.023	2.12985e-32
ZXDC	1.17975e-36	0.207744	0.101	0.072	2.13357e-32
BAIAP2	1.36337e-36	0.106737	0.08	0.054	2.46566e-32
PPP1R9B	1.40365e-36	0.12312	0.125	0.091	2.53851e-32
SLC23A2	1.47706e-36	0.184054	0.107	0.077	2.67126e-32
NAT8L	1.55889e-36	0.119116	0.107	0.077	2.81925e-32
ARPC3	1.57006e-36	0.163278	0.058	0.036	2.83946e-32
SMNDC1	1.62201e-36	0.107793	0.121	0.088	2.93341e-32
ACSBG1	1.66575e-36	0.535648	0.012	0.003	3.01251e-32
SDF4	1.67159e-36	0.100407	0.142	0.106	3.02307e-32
KLHL5	1.73047e-36	0.16039	0.099	0.07	3.12955e-32
ADAMTS2	1.78301e-36	0.164732	0.03	0.015	3.22457e-32
EXT2	1.79427e-36	0.291771	0.071	0.047	3.24494e-32
RIPOR1	2.12453e-36	0.139866	0.11	0.079	3.84221e-32
LTBP4	2.14517e-36	0.176962	0.136	0.101	3.87954e-32
NDUFS8	2.15626e-36	0.194229	0.061	0.039	3.8996e-32
CEP78	2.23392e-36	0.306198	0.058	0.037	4.04005e-32
FLNC	2.33733e-36	0.373278	0.022	0.01	4.22706e-32
RAB7A	2.37574e-36	0.113593	0.095	0.067	4.29652e-32
CPNE2	2.3826e-36	0.116381	0.085	0.058	4.30893e-32
SLC39A6	2.56181e-36	0.130455	0.144	0.108	4.63304e-32
DENND5B	3.08641e-36	0.187066	0.101	0.072	5.58176e-32
PCDHB5	3.30328e-36	-0.966322	0.02	0.035	5.97397e-32
PTDSS1	3.30758e-36	0.190184	0.09	0.062	5.98175e-32
EDC4	3.399e-36	0.113871	0.1	0.071	6.14709e-32
LIMK1	3.46624e-36	0.159511	0.096	0.068	6.26869e-32
LUC7L	4.27896e-36	0.109745	0.226	0.178	7.7385e-32
PPID	4.71624e-36	0.17841	0.079	0.053	8.52931e-32
FBRSL1	4.86087e-36	0.161945	0.11	0.079	8.79089e-32
TBRG4	5.03327e-36	0.204186	0.059	0.037	9.10268e-32
NUP133	5.40115e-36	0.102369	0.12	0.087	9.76797e-32
ELMO2	5.57423e-36	0.116115	0.098	0.069	1.0081e-31
POLR2B	5.84613e-36	0.135931	0.128	0.095	1.05727e-31
P4HA1	6.09266e-36	-0.631105	0.182	0.204	1.10186e-31
BSDC1	6.51895e-36	0.157885	0.124	0.092	1.17895e-31
EIF4E	7.11548e-36	0.124449	0.099	0.07	1.28683e-31
FIBP	7.29346e-36	0.173343	0.059	0.037	1.31902e-31
ZMYND19	1.19843e-35	0.246873	0.07	0.047	2.16736e-31
ITM2B	1.30539e-35	0.124239	0.148	0.111	2.36081e-31
CTSD	1.46032e-35	0.311269	0.049	0.03	2.64099e-31
BCAR1	1.66635e-35	0.18779	0.095	0.067	3.0136e-31
GABRB3	1.71725e-35	0.136767	0.131	0.097	3.10565e-31
MAP2K1	1.78995e-35	0.111117	0.09	0.062	3.23712e-31
CAPN2	1.89924e-35	0.157322	0.09	0.063	3.43478e-31
TMEM50B	1.95194e-35	0.162143	0.112	0.082	3.53008e-31
PLCB1	2.01354e-35	0.77867	0.029	0.015	3.64149e-31
COX18	2.09532e-35	0.170645	0.092	0.065	3.78939e-31
SPTBN1	2.30882e-35	0.175171	0.077	0.052	4.1755e-31
DIPK1C	2.45826e-35	0.561007	0.01	0.002	4.44577e-31
MRS2	2.48201e-35	0.1117	0.104	0.075	4.48872e-31
TRIM23	2.58602e-35	0.204683	0.1	0.071	4.67682e-31
PLPPR1	2.59167e-35	0.39523	0.05	0.031	4.68703e-31
AP3M1	2.75783e-35	0.101346	0.104	0.075	4.98754e-31
UVRAG	2.8356e-35	0.247918	0.053	0.033	5.12818e-31
FAM110B	2.86322e-35	0.348919	0.068	0.046	5.17813e-31
CARNMT1	2.87473e-35	0.422319	0.052	0.032	5.19895e-31
TNFRSF25	2.98843e-35	0.159291	0.068	0.045	5.40457e-31
CALY	3.03846e-35	0.469284	0.035	0.019	5.49505e-31
MIB2	3.06603e-35	0.139642	0.101	0.072	5.54492e-31
ZNF316	3.27879e-35	0.117005	0.152	0.115	5.92969e-31
B4GALT2	3.79228e-35	0.158507	0.107	0.077	6.85834e-31
GLRX3	4.05991e-35	0.100493	0.078	0.053	7.34235e-31
SNCA	4.1114e-35	0.327246	0.101	0.074	7.43548e-31
TP53INP1	4.20621e-35	0.178128	0.077	0.052	7.60693e-31
WDR86	4.51921e-35	0.318556	0.053	0.033	8.17299e-31
ELP1	4.54954e-35	0.12826	0.108	0.078	8.22785e-31
RBM18	5.53903e-35	0.155751	0.095	0.067	1.00173e-30
TXNDC15	5.57527e-35	0.150479	0.097	0.068	1.00829e-30
VTI1B	5.67126e-35	0.129327	0.102	0.073	1.02565e-30
CCDC167	6.21871e-35	0.112069	0.09	0.063	1.12465e-30
MTHFD2	6.69572e-35	0.222065	0.07	0.046	1.21092e-30
SALL1	6.87285e-35	0.295666	0.09	0.063	1.24296e-30
MARK4	7.97391e-35	0.215135	0.063	0.041	1.44208e-30
PKN1	8.34812e-35	0.133813	0.089	0.062	1.50976e-30
TMEM132A	8.38744e-35	0.228825	0.07	0.047	1.51687e-30
MRTFA	8.46967e-35	0.111444	0.111	0.08	1.53174e-30
DCTD	1.01804e-34	0.170225	0.057	0.036	1.84112e-30
CSPG5	1.04243e-34	0.224737	0.063	0.041	1.88523e-30
ASAP2	1.15757e-34	0.188415	0.097	0.069	2.09346e-30
UBE2J1	1.38225e-34	0.117904	0.095	0.067	2.49981e-30
BAX	1.42234e-34	0.176795	0.061	0.039	2.5723e-30
TGOLN2	1.49191e-34	0.147731	0.1	0.071	2.69813e-30
CIAO2B	1.49409e-34	0.120963	0.097	0.069	2.70206e-30
PIP4K2B	1.69562e-34	0.114912	0.167	0.129	3.06653e-30
NSMF	1.76537e-34	0.174229	0.064	0.042	3.19268e-30
BTG2	1.87377e-34	0.134433	0.056	0.036	3.38871e-30
NXPH1	1.91904e-34	1.12677	0.022	0.01	3.47059e-30
WRN	2.05262e-34	0.160706	0.08	0.055	3.71216e-30
CLIC4	2.6844e-34	0.11615	0.186	0.145	4.85473e-30
TSPAN4	2.85861e-34	0.133364	0.074	0.05	5.1698e-30
CTPS1	2.96912e-34	0.190589	0.073	0.049	5.36966e-30
RIMS3	3.56036e-34	0.115972	0.096	0.069	6.43891e-30
PXYLP1	3.62052e-34	0.349827	0.043	0.025	6.5477e-30
MROH1	3.79487e-34	0.14355	0.088	0.062	6.86302e-30
ANKRD13B	3.82277e-34	0.137731	0.141	0.107	6.91347e-30
RNF8	3.904e-34	0.205493	0.07	0.047	7.06039e-30
IGBP1	4.37931e-34	0.1539	0.082	0.057	7.91999e-30
PTPRO	4.54887e-34	0.244055	0.088	0.063	8.22663e-30
FOXK2	4.64378e-34	0.144519	0.101	0.073	8.39827e-30
SMG5	4.85995e-34	0.111077	0.103	0.074	8.78922e-30
RIMBP2	4.89662e-34	0.254976	0.055	0.035	8.85554e-30
FAM210B	5.14987e-34	0.329454	0.04	0.023	9.31354e-30
WDFY2	5.45312e-34	0.177031	0.071	0.048	9.86196e-30
TTLL4	5.69422e-34	0.451511	0.031	0.017	1.0298e-29
AMFR	5.83914e-34	0.314072	0.052	0.033	1.05601e-29
PDHX	5.92041e-34	0.147586	0.098	0.07	1.07071e-29
PPP1R7	6.10619e-34	0.107636	0.114	0.084	1.1043e-29
CYP51A1	6.15948e-34	0.321486	0.065	0.043	1.11394e-29
PGAP1	7.00927e-34	0.100373	0.171	0.132	1.26763e-29
SF3B5	8.35912e-34	0.159144	0.09	0.064	1.51175e-29
CHML	8.51188e-34	0.313244	0.06	0.039	1.53937e-29
FABP5	9.0457e-34	0.123422	0.062	0.041	1.63591e-29
SYNPR	9.32092e-34	0.880687	0.025	0.012	1.68569e-29
CTNNA2	9.98135e-34	0.163116	0.097	0.07	1.80513e-29
GLCE	1.17451e-33	0.209849	0.079	0.054	2.1241e-29
PCBD1	1.21122e-33	0.405599	0.04	0.024	2.19049e-29
ANKRD13D	1.42957e-33	0.18261	0.09	0.064	2.58538e-29
C19orf53	1.44205e-33	0.126837	0.097	0.07	2.60794e-29
LASP1	1.73931e-33	0.109431	0.121	0.09	3.14555e-29
PDPR	1.79738e-33	-0.756678	0.091	0.114	3.25057e-29
ACVR1	1.80515e-33	0.363483	0.06	0.039	3.26461e-29
NKAIN4	2.00027e-33	0.120914	0.059	0.038	3.61749e-29
TNFRSF21	2.04895e-33	0.232629	0.065	0.043	3.70552e-29
SMC5	2.06047e-33	0.227932	0.062	0.041	3.72636e-29
TMEM120B	2.14279e-33	0.212621	0.057	0.036	3.87523e-29
APPL1	2.17452e-33	0.111815	0.118	0.087	3.93262e-29
UBE2QL1	2.35828e-33	0.324874	0.069	0.046	4.26495e-29
SMAD5	2.56853e-33	0.121779	0.113	0.083	4.64519e-29
NIPSNAP2	2.64786e-33	0.11392	0.094	0.067	4.78865e-29
RTN4R	2.66367e-33	0.122807	0.047	0.028	4.81725e-29
CDH23	2.68837e-33	0.51217	0.04	0.024	4.86193e-29
ZCCHC12	2.80961e-33	0.166466	0.092	0.066	5.08118e-29
PYURF	2.81928e-33	0.106625	0.134	0.1	5.09866e-29
HNRNPH3	2.99764e-33	0.141136	0.127	0.095	5.42123e-29
SUCLG1	3.50976e-33	0.169055	0.102	0.074	6.34741e-29
CBX4	3.68174e-33	0.110034	0.14	0.105	6.65843e-29
BICD1	3.90603e-33	0.150881	0.116	0.086	7.06405e-29
HERPUD1	4.23333e-33	0.201198	0.08	0.056	7.65598e-29
MTSS1	4.30492e-33	0.118647	0.126	0.094	7.78544e-29
ACAT1	5.23492e-33	0.380136	0.041	0.024	9.46736e-29
TSN	5.33099e-33	0.118985	0.093	0.067	9.64109e-29
LARP4B	6.31232e-33	0.133244	0.078	0.053	1.14158e-28
TOX2	6.58043e-33	0.218337	0.026	0.013	1.19007e-28
FAM218A	7.01813e-33	0.878812	0.02	0.009	1.26923e-28
DNAJC3	7.25707e-33	0.119089	0.088	0.062	1.31244e-28
NT5C2	9.11871e-33	0.138256	0.094	0.067	1.64912e-28
SYNGR1	9.82689e-33	0.157136	0.098	0.071	1.77719e-28
SELENOT	1.00146e-32	0.119251	0.086	0.061	1.81113e-28
BLOC1S2	1.53e-32	0.198225	0.072	0.049	2.767e-28
NAA25	1.5406e-32	0.263308	0.081	0.057	2.78617e-28
CHGB	1.56188e-32	0.117476	0.092	0.065	2.82467e-28
UBAC1	1.62761e-32	0.171197	0.083	0.058	2.94353e-28
SMAD1	1.90842e-32	0.26198	0.055	0.035	3.45138e-28
ENTPD6	1.91679e-32	0.165845	0.093	0.067	3.46652e-28
ATP6V0E2	2.05274e-32	0.148917	0.086	0.061	3.71237e-28
RNF20	2.09488e-32	0.108577	0.077	0.053	3.7886e-28
NHS	2.12715e-32	0.853883	0.017	0.007	3.84696e-28
ST8SIA5	2.15111e-32	0.949058	0.021	0.009	3.89028e-28
RASSF4	2.1608e-32	0.721498	0.018	0.008	3.90781e-28
CAMK2G	2.20803e-32	0.147766	0.081	0.057	3.99322e-28
TUBE1	2.23711e-32	0.135111	0.078	0.054	4.04582e-28
CXXC5	2.3207e-32	0.143866	0.078	0.054	4.19698e-28
ZFHX4	2.36153e-32	-0.626646	0.113	0.137	4.27083e-28
PHGDH	2.43923e-32	0.149499	0.135	0.102	4.41134e-28
NTN4	2.80811e-32	0.45401	0.037	0.022	5.07847e-28
ANKLE2	2.97044e-32	0.172967	0.079	0.055	5.37204e-28
COPRS	3.06078e-32	0.159863	0.047	0.029	5.53542e-28
ATP6AP2	3.12343e-32	0.419278	0.055	0.036	5.64872e-28
GRHPR	3.16598e-32	0.235433	0.052	0.033	5.72567e-28
MED14	3.45917e-32	0.350309	0.075	0.053	6.25591e-28
TMEM123	3.51577e-32	0.263239	0.05	0.031	6.35828e-28
CLEC16A	3.96957e-32	0.140649	0.097	0.07	7.17897e-28
CASP9	5.00656e-32	0.271291	0.068	0.047	9.05436e-28
BBS7	5.97565e-32	0.142931	0.073	0.05	1.0807e-27
LGI1	5.98088e-32	0.989879	0.025	0.013	1.08164e-27
PPM1E	6.06661e-32	0.379274	0.048	0.03	1.09715e-27
EIF4E3	6.96474e-32	0.149195	0.074	0.051	1.25957e-27
XPO5	7.03977e-32	0.172035	0.086	0.061	1.27314e-27
CRELD1	7.1362e-32	0.20884	0.073	0.051	1.29058e-27
MCUR1	7.19393e-32	0.206199	0.057	0.037	1.30102e-27
KAT6B	7.72151e-32	0.385787	0.072	0.05	1.39643e-27
NDUFA6	8.27172e-32	0.191625	0.072	0.05	1.49594e-27
S100A13	8.93994e-32	0.154614	0.024	0.012	1.61679e-27
FOXP4	9.02167e-32	-0.668699	0.105	0.128	1.63157e-27
BCAS3	9.59184e-32	0.18619	0.067	0.046	1.73469e-27
FAM200B	9.66982e-32	0.129811	0.092	0.066	1.74879e-27
NALCN	9.81692e-32	0.198732	0.046	0.028	1.77539e-27
TAF1D	1.05931e-31	0.122516	0.107	0.079	1.91576e-27
PEMT	1.11523e-31	0.113515	0.062	0.041	2.01689e-27
SESN1	1.16897e-31	0.164332	0.076	0.052	2.11408e-27
ZFP36L2	1.18908e-31	0.214585	0.043	0.026	2.15045e-27
ELAVL3	1.2483e-31	0.101621	0.401	0.336	2.25754e-27
TOX	1.27754e-31	0.243124	0.078	0.055	2.31043e-27
TMEM184B	1.31381e-31	0.176687	0.072	0.05	2.37603e-27
AKAP12	1.35755e-31	0.133715	0.119	0.089	2.45513e-27
TBL1X	1.36736e-31	0.569456	0.033	0.019	2.47288e-27
PPP6R3	1.47543e-31	0.100058	0.117	0.087	2.66832e-27
CERS4	1.68924e-31	0.100568	0.085	0.06	3.05499e-27
CTBP2	1.76091e-31	0.11349	0.1	0.072	3.18461e-27
AAK1	1.76379e-31	0.109503	0.135	0.102	3.18982e-27
PEG3	1.78803e-31	-1.10778	0.005	0.012	3.23366e-27
IRS2	1.79333e-31	0.110353	0.079	0.055	3.24324e-27
NUDT16	2.10795e-31	0.203006	0.063	0.042	3.81224e-27
PSMA3	2.24528e-31	0.119001	0.068	0.046	4.06058e-27
USP10	2.68129e-31	0.109005	0.123	0.093	4.84911e-27
SEMA6C	2.84291e-31	0.150545	0.1	0.073	5.14141e-27
NR2F6	3.0496e-31	0.142202	0.061	0.04	5.5152e-27
ORC3	3.14584e-31	0.107528	0.106	0.078	5.68925e-27
PCDH8	3.15366e-31	0.472745	0.038	0.022	5.7034e-27
RALGPS2	3.20401e-31	0.159276	0.066	0.044	5.79445e-27
DYNC1LI1	3.43154e-31	0.15004	0.108	0.079	6.20593e-27
PPA2	3.49703e-31	0.207744	0.053	0.034	6.32438e-27
FGF14	3.50979e-31	0.230356	0.056	0.037	6.34745e-27
BRD3OS	3.5548e-31	0.136373	0.081	0.057	6.42886e-27
CEP170B	3.6732e-31	0.268788	0.051	0.032	6.64298e-27
ENHO	3.76747e-31	0.114775	0.072	0.049	6.81347e-27
RAC3	3.82518e-31	0.400805	0.048	0.03	6.91784e-27
DDN	3.97833e-31	1.11023	0.021	0.01	7.19481e-27
DDX49	4.02679e-31	0.111778	0.091	0.066	7.28244e-27
CALCOCO2	4.59897e-31	0.272565	0.057	0.037	8.31724e-27
WIPF3	4.92096e-31	0.400002	0.056	0.037	8.89955e-27
FUNDC1	5.64027e-31	0.474122	0.042	0.026	1.02004e-26
PHKB	6.79989e-31	0.117682	0.128	0.097	1.22976e-26
RPN1	6.80294e-31	0.105815	0.086	0.061	1.23031e-26
SCG2	7.06035e-31	0.133262	0.065	0.044	1.27686e-26
GAB2	7.39043e-31	0.114696	0.08	0.056	1.33656e-26
RAB11FIP4	7.76064e-31	0.281765	0.059	0.039	1.40351e-26
STX7	7.81093e-31	0.149618	0.135	0.103	1.41261e-26
PIP4P1	8.024e-31	0.111436	0.092	0.066	1.45114e-26
AP4B1	8.15056e-31	0.126339	0.094	0.068	1.47403e-26
USP36	8.26792e-31	0.108272	0.097	0.07	1.49525e-26
FYTTD1	8.32917e-31	0.104955	0.101	0.074	1.50633e-26
HSPA4	9.48795e-31	0.139004	0.092	0.066	1.7159e-26
NAA15	1.05079e-30	0.106651	0.125	0.094	1.90035e-26
PACSIN2	1.07778e-30	0.533534	0.028	0.015	1.94917e-26
SCAPER	1.08986e-30	0.179268	0.062	0.041	1.97101e-26
ANKRD28	1.29683e-30	0.169297	0.095	0.069	2.34532e-26
MOXD1	1.31709e-30	0.396625	0.093	0.069	2.38196e-26
SIGMAR1	1.40075e-30	0.247642	0.051	0.033	2.53326e-26
CAPRIN2	1.76926e-30	0.304852	0.053	0.034	3.19971e-26
PDE1A	1.82735e-30	0.355883	0.012	0.004	3.30477e-26
NIFK	1.98981e-30	0.366128	0.036	0.021	3.59856e-26
RAPGEF1	2.04798e-30	0.116377	0.074	0.052	3.70377e-26
ALKBH7	2.18509e-30	0.194344	0.079	0.056	3.95174e-26
MANEAL	2.23214e-30	0.120562	0.084	0.06	4.03683e-26
CRY2	2.25241e-30	0.218235	0.086	0.062	4.07349e-26
PXK	2.35586e-30	0.205254	0.078	0.055	4.26058e-26
UBE2D2	2.40088e-30	0.127709	0.125	0.094	4.342e-26
CDK17	2.45267e-30	0.178107	0.094	0.068	4.43565e-26
NRXN3	2.45387e-30	0.158534	0.135	0.104	4.43783e-26
PPP1R26	2.85127e-30	0.178478	0.067	0.045	5.15652e-26
FBLL1	3.36592e-30	0.253182	0.056	0.037	6.08727e-26
TTC19	3.75352e-30	0.111851	0.1	0.074	6.78825e-26
BTBD17	4.2519e-30	-0.135818	0.04	0.024	7.68956e-26
ANXA7	4.41697e-30	0.123928	0.066	0.045	7.98809e-26
GATAD2A	4.51803e-30	0.147824	0.075	0.053	8.17085e-26
CLN8	5.07884e-30	0.227568	0.044	0.027	9.18509e-26
CLIP2	5.15437e-30	0.117836	0.118	0.089	9.32168e-26
FGF13	5.41284e-30	0.536018	0.026	0.014	9.78912e-26
NINJ1	6.04054e-30	0.351056	0.034	0.02	1.09243e-25
GALNT9	6.29149e-30	0.631568	0.021	0.01	1.13782e-25
NXPE3	6.42247e-30	0.312565	0.058	0.038	1.1615e-25
HSP90B1	6.46495e-30	0.107277	0.061	0.041	1.16919e-25
MEST	6.49512e-30	-0.303834	0.456	0.46	1.17464e-25
MAPK14	6.58971e-30	0.129253	0.08	0.057	1.19175e-25
ATXN2L	6.62474e-30	0.123826	0.082	0.058	1.19808e-25
AARS	6.63054e-30	0.154389	0.074	0.052	1.19913e-25
UBAP2	6.8307e-30	0.123881	0.064	0.043	1.23533e-25
ARHGDIG	6.83614e-30	0.115566	0.093	0.068	1.23632e-25
CEP85L	7.03701e-30	0.187941	0.065	0.044	1.27264e-25
KBTBD6	7.43557e-30	0.198699	0.061	0.041	1.34472e-25
VPS53	7.81695e-30	0.106844	0.11	0.082	1.41369e-25
ARRB2	7.82406e-30	0.17644	0.075	0.053	1.41498e-25
WDR36	8.22756e-30	0.101344	0.102	0.075	1.48795e-25
MAPK12	8.65975e-30	0.104492	0.099	0.072	1.56612e-25
ARHGEF2	8.9811e-30	0.155036	0.115	0.086	1.62423e-25
GALNT16	9.17228e-30	0.109051	0.045	0.028	1.65881e-25
UBA1	9.23959e-30	0.473454	0.025	0.013	1.67098e-25
ZC3H7B	9.55794e-30	0.135378	0.078	0.056	1.72855e-25
PABPC5	9.63709e-30	0.523943	0.022	0.011	1.74287e-25
ZNF333	1.01166e-29	0.164313	0.086	0.062	1.82959e-25
HINT3	1.04412e-29	0.122926	0.066	0.045	1.88829e-25
WDR20	1.07203e-29	0.110627	0.095	0.069	1.93876e-25
SNAP25	1.09648e-29	0.219452	0.083	0.06	1.98298e-25
LPCAT4	1.16208e-29	0.179461	0.091	0.066	2.10162e-25
STX6	1.18129e-29	0.163448	0.103	0.076	2.13637e-25
SUSD1	1.18942e-29	0.44832	0.023	0.011	2.15107e-25
SCAMP1	1.19733e-29	0.107685	0.173	0.136	2.16536e-25
ANKRD27	1.42236e-29	0.208642	0.056	0.037	2.57233e-25
ABCA3	1.49834e-29	0.182547	0.066	0.045	2.70975e-25
FAM49A	1.59953e-29	0.25746	0.068	0.047	2.89274e-25
RWDD1	1.77228e-29	0.112236	0.078	0.055	3.20517e-25
MFSD9	1.8789e-29	0.294269	0.045	0.028	3.39799e-25
MRC2	1.94912e-29	0.253847	0.06	0.04	3.52498e-25
KIF3A	1.97106e-29	0.130044	0.089	0.064	3.56466e-25
EIF2B2	2.14355e-29	0.158818	0.064	0.044	3.8766e-25
BRK1	2.23378e-29	0.133945	0.05	0.032	4.03979e-25
SAMD5	2.4682e-29	0.83255	0.011	0.004	4.46374e-25
DGKD	2.4999e-29	0.211995	0.066	0.045	4.52106e-25
ATL2	2.5018e-29	0.114183	0.116	0.087	4.5245e-25
IRX2	2.63926e-29	0.418626	0.01	0.003	4.7731e-25
PACC1	2.69944e-29	0.422074	0.032	0.018	4.88194e-25
GLUD1	2.81772e-29	0.130096	0.066	0.045	5.09585e-25
BACE1	3.23444e-29	0.120983	0.062	0.042	5.84948e-25
TOMM22	3.46787e-29	0.156049	0.087	0.063	6.27164e-25
PLPBP	3.52343e-29	0.155466	0.059	0.04	6.37212e-25
CSK	3.6e-29	0.187667	0.071	0.049	6.5106e-25
MVB12B	3.67707e-29	0.126454	0.107	0.08	6.64999e-25
MOSPD2	3.92597e-29	0.358423	0.036	0.021	7.10012e-25
PREX1	3.95707e-29	0.127012	0.049	0.032	7.15636e-25
HAT1	4.02262e-29	0.140887	0.089	0.064	7.27491e-25
ST13	4.16888e-29	0.158414	0.075	0.053	7.53943e-25
MUC20	4.34939e-29	0.401037	0.035	0.02	7.86587e-25
KPNA6	4.4014e-29	0.225343	0.059	0.04	7.95993e-25
TMEM189	4.83338e-29	0.108019	0.069	0.048	8.74116e-25
UPF1	5.55807e-29	0.140532	0.076	0.053	1.00518e-24
SLF2	6.60497e-29	0.153832	0.07	0.048	1.19451e-24
PTPRK	6.8176e-29	0.492769	0.034	0.02	1.23296e-24
SOD2	7.15458e-29	0.233413	0.047	0.03	1.29391e-24
BCLAF3	7.23027e-29	0.147935	0.09	0.066	1.30759e-24
MACROD1	7.78436e-29	0.221645	0.052	0.034	1.4078e-24
DVL1	8.63836e-29	0.142287	0.074	0.052	1.56225e-24
BAHD1	9.66674e-29	0.216574	0.058	0.039	1.74823e-24
CAMK2D	9.74881e-29	0.28627	0.068	0.048	1.76307e-24
RYR3	1.00516e-28	0.740741	0.012	0.004	1.81784e-24
GALR1	1.03926e-28	0.931472	0.01	0.003	1.8795e-24
GTF3C1	1.20185e-28	0.101039	0.081	0.058	2.17355e-24
EXOC2	1.24374e-28	0.145725	0.081	0.058	2.2493e-24
NRP1	1.31015e-28	0.302952	0.027	0.014	2.36941e-24
PMM1	1.36209e-28	0.110921	0.091	0.066	2.46334e-24
VPS36	1.45299e-28	0.151219	0.075	0.053	2.62774e-24
STARD3NL	1.51572e-28	0.169929	0.072	0.051	2.74118e-24
B4GALNT1	1.56549e-28	0.147341	0.075	0.053	2.83119e-24
ELMO1	1.60979e-28	0.29896	0.049	0.032	2.9113e-24
ZPR1	1.63935e-28	0.320662	0.042	0.026	2.96477e-24
TRAF3	1.70049e-28	0.186809	0.048	0.031	3.07533e-24
PLEKHG5	1.77394e-28	0.109546	0.063	0.043	3.20816e-24
ZBTB44	1.81314e-28	0.14613	0.129	0.099	3.27906e-24
EPHX1	1.82223e-28	0.247242	0.053	0.035	3.2955e-24
SYT7	2.02423e-28	0.23719	0.064	0.044	3.66082e-24
CENPM	2.04377e-28	0.212863	0.053	0.035	3.69616e-24
LAMP2	2.16238e-28	0.108004	0.072	0.051	3.91067e-24
TRIAP1	2.22704e-28	0.163023	0.061	0.042	4.0276e-24
FAM122A	2.27874e-28	0.536404	0.029	0.016	4.12111e-24
CITED2	2.50204e-28	0.139616	0.105	0.079	4.52494e-24
TTL	2.57564e-28	0.128074	0.084	0.061	4.65805e-24
GNB4	2.64847e-28	0.203552	0.075	0.053	4.78976e-24
SH3GL3	2.97426e-28	0.277395	0.062	0.042	5.37895e-24
ARIH2	3.18242e-28	0.165789	0.076	0.054	5.7554e-24
FDXR	3.28506e-28	0.398032	0.039	0.024	5.94103e-24
AGO4	3.50319e-28	0.147871	0.078	0.055	6.33552e-24
CUL1	3.63725e-28	0.143528	0.095	0.07	6.57796e-24
NPTXR	3.82412e-28	0.282455	0.045	0.029	6.91592e-24
KIFC2	4.17977e-28	0.192943	0.114	0.087	7.55911e-24
TATDN3	4.23513e-28	0.113858	0.087	0.063	7.65923e-24
GPR27	4.33823e-28	0.173904	0.083	0.06	7.84569e-24
SRR	4.87552e-28	0.165293	0.057	0.038	8.81738e-24
DST	5.48424e-28	0.128827	0.124	0.095	9.91824e-24
TGFBR1	5.66791e-28	0.106408	0.067	0.046	1.02504e-23
TOM1L2	7.40455e-28	0.118041	0.107	0.08	1.33911e-23
CNRIP1	7.47264e-28	0.111508	0.064	0.044	1.35143e-23
TMEM231	7.6625e-28	0.276404	0.043	0.027	1.38576e-23
STRN4	7.86451e-28	0.129338	0.116	0.088	1.4223e-23
PCSK2	7.94312e-28	0.395815	0.031	0.018	1.43651e-23
PRPSAP1	9.3984e-28	0.122815	0.107	0.08	1.6997e-23
MPRIP	9.56409e-28	0.118282	0.128	0.098	1.72967e-23
COL3A1	1.03636e-27	1.23082	0.011	0.004	1.87426e-23
PITPNM1	1.25799e-27	0.189164	0.063	0.043	2.27508e-23
VAC14	1.29098e-27	0.120877	0.045	0.029	2.33475e-23
RINT1	1.38231e-27	0.106355	0.082	0.059	2.4999e-23
MEN1	1.42216e-27	0.242411	0.05	0.033	2.57198e-23
XRN1	1.47095e-27	0.128287	0.093	0.069	2.66022e-23
PEX6	1.47191e-27	0.534118	0.034	0.02	2.66195e-23
SERPINE2	1.5062e-27	0.144632	0.042	0.026	2.72396e-23
LOXL1	1.60441e-27	0.15755	0.02	0.009	2.90158e-23
CNPY3	1.61447e-27	0.116261	0.085	0.062	2.91977e-23
ASIC1	1.63312e-27	0.108756	0.055	0.037	2.9535e-23
SLC35B1	1.7201e-27	0.137822	0.057	0.038	3.1108e-23
SLC5A3	1.79581e-27	0.135558	0.094	0.07	3.24772e-23
ZFX	1.90897e-27	0.384972	0.036	0.021	3.45236e-23
HECTD1	1.96768e-27	0.394158	0.041	0.026	3.55854e-23
PSMC1	2.07929e-27	0.113563	0.073	0.051	3.7604e-23
ZFYVE16	2.22256e-27	0.152802	0.09	0.066	4.0195e-23
C2orf72	2.24101e-27	0.13807	0.05	0.033	4.05287e-23
ZDHHC2	2.32806e-27	0.106842	0.06	0.041	4.21029e-23
PRKCI	2.48587e-27	0.123966	0.078	0.056	4.4957e-23
RHOQ	2.6379e-27	0.107739	0.069	0.048	4.77065e-23
GUCY1B1	2.75893e-27	0.553986	0.038	0.023	4.98953e-23
COX20	2.817e-27	-0.818737	0.036	0.052	5.09454e-23
BLVRB	2.93672e-27	0.239079	0.048	0.032	5.31105e-23
RAI14	3.10341e-27	0.536517	0.038	0.024	5.61251e-23
ACADVL	3.79228e-27	0.143368	0.043	0.027	6.85835e-23
CAP2	3.86022e-27	0.375689	0.035	0.021	6.98122e-23
HACE1	3.91638e-27	0.163474	0.099	0.074	7.08277e-23
TMEM42	3.92896e-27	0.208485	0.047	0.03	7.10553e-23
ANO5	4.03804e-27	0.47133	0.031	0.018	7.3028e-23
SLC6A15	4.43097e-27	0.107351	0.052	0.034	8.01341e-23
CXorf38	4.43788e-27	0.347192	0.052	0.035	8.02591e-23
DMAC1	4.43996e-27	0.185224	0.078	0.056	8.02966e-23
FAM181A	4.96287e-27	0.106587	0.015	0.006	8.97535e-23
NANS	5.31273e-27	0.152635	0.052	0.035	9.60807e-23
BRINP1	5.61817e-27	0.559159	0.03	0.017	1.01605e-22
PNMA8A	5.86728e-27	0.156671	0.06	0.041	1.0611e-22
ATP6V1F	6.09404e-27	0.1313	0.101	0.076	1.10211e-22
CNN2	6.43955e-27	0.152537	0.131	0.102	1.16459e-22
SEMA4F	6.58094e-27	0.424105	0.033	0.019	1.19016e-22
CDH10	6.82381e-27	0.376578	0.032	0.019	1.23409e-22
CECR2	6.87474e-27	0.200391	0.042	0.027	1.2433e-22
CD81	6.96177e-27	0.104089	0.055	0.037	1.25904e-22
LHX6	7.12467e-27	-0.231724	0.022	0.011	1.2885e-22
CDC25A	7.35013e-27	0.350925	0.038	0.023	1.32927e-22
VAV2	7.46976e-27	0.188651	0.059	0.04	1.35091e-22
ABHD18	7.47051e-27	0.16178	0.074	0.053	1.35104e-22
EXOSC6	8.21867e-27	0.208696	0.08	0.058	1.48635e-22
FAM172A	8.49275e-27	0.134622	0.071	0.051	1.53591e-22
PRDX1	8.79942e-27	0.117942	0.061	0.042	1.59137e-22
GFRA2	9.18511e-27	0.231776	0.048	0.031	1.66113e-22
RCAN3	9.42969e-27	0.231027	0.061	0.042	1.70536e-22
GTPBP4	1.02329e-26	0.136239	0.111	0.084	1.85062e-22
RHPN2	1.02514e-26	0.115094	0.028	0.016	1.85397e-22
IFT57	1.22436e-26	0.105737	0.066	0.046	2.21426e-22
ACAT2	1.24586e-26	0.12199	0.111	0.084	2.25314e-22
TSR2	1.2473e-26	0.129735	0.062	0.043	2.25573e-22
RASSF2	1.33825e-26	0.236793	0.051	0.034	2.42022e-22
DACT3	1.35649e-26	0.11756	0.108	0.082	2.45321e-22
GABRB1	1.49212e-26	0.516175	0.019	0.009	2.6985e-22
HIP1R	1.71544e-26	0.243628	0.054	0.036	3.10237e-22
SNX10	1.76758e-26	0.251677	0.047	0.031	3.19667e-22
CEMIP2	1.84877e-26	0.29326	0.039	0.025	3.34349e-22
AMBRA1	1.92851e-26	0.115441	0.073	0.052	3.48772e-22
STARD10	2.07794e-26	0.225884	0.056	0.038	3.75795e-22
CYFIP1	2.09009e-26	0.167118	0.049	0.032	3.77994e-22
TASOR	2.11057e-26	0.110779	0.089	0.066	3.81696e-22
CHPT1	2.52223e-26	0.232922	0.057	0.039	4.56144e-22
USP24	2.55449e-26	0.130633	0.1	0.075	4.6198e-22
RAB3IP	2.57659e-26	0.127245	0.102	0.077	4.65976e-22
COMMD10	2.70822e-26	0.485697	0.02	0.01	4.89781e-22
DHPS	2.72665e-26	0.131227	0.122	0.094	4.93116e-22
DDX27	2.94374e-26	0.173913	0.056	0.038	5.32375e-22
C9orf85	3.08652e-26	0.304192	0.031	0.018	5.58196e-22
C11orf96	3.1787e-26	0.106785	0.093	0.069	5.74867e-22
CLCN4	3.20732e-26	0.161874	0.071	0.05	5.80045e-22
PTN	3.51402e-26	0.279921	0.24	0.203	6.35511e-22
PSMD11	3.9296e-26	0.185716	0.064	0.045	7.10669e-22
HOMER2	4.05088e-26	1.06602	0.016	0.007	7.32602e-22
PPP2R2D	4.13084e-26	0.110831	0.084	0.062	7.47063e-22
SLC35A1	4.5389e-26	0.111187	0.062	0.043	8.20861e-22
ANXA5	4.66298e-26	0.206386	0.039	0.025	8.433e-22
LRRTM4	4.72094e-26	0.128388	0.095	0.071	8.53782e-22
SBF1	4.74504e-26	0.126196	0.052	0.035	8.5814e-22
LOX	4.90499e-26	-0.892467	0.032	0.046	8.87068e-22
DOK6	5.0269e-26	0.234269	0.054	0.036	9.09115e-22
GPS2	5.09249e-26	0.118092	0.063	0.044	9.20977e-22
NSDHL	5.77071e-26	0.232479	0.051	0.034	1.04363e-21
PDZRN3	5.82995e-26	0.138955	0.078	0.056	1.05435e-21
PAQR3	5.90608e-26	0.108429	0.069	0.049	1.06811e-21
ANKH	5.97305e-26	0.371442	0.041	0.026	1.08023e-21
STK32A	5.99036e-26	0.533708	0.021	0.011	1.08336e-21
STON2	6.12396e-26	0.337338	0.028	0.016	1.10752e-21
COX6B1	6.34398e-26	0.23252	0.034	0.02	1.14731e-21
SELENOI	6.39301e-26	0.335	0.04	0.025	1.15618e-21
CBLL1	6.75128e-26	0.16939	0.057	0.039	1.22097e-21
POLA1	6.80396e-26	0.719266	0.017	0.008	1.2305e-21
BCL7C	6.86016e-26	0.124483	0.062	0.043	1.24066e-21
PLEKHB1	6.97427e-26	0.441021	0.013	0.005	1.2613e-21
DCP1B	6.9932e-26	0.152746	0.077	0.056	1.26472e-21
UPF3A	7.84986e-26	0.145184	0.076	0.055	1.41965e-21
PMS2	8.59529e-26	0.264439	0.042	0.027	1.55446e-21
GRB10	9.06526e-26	0.1609	0.081	0.059	1.63945e-21
PMP2	9.39232e-26	-0.293901	0.021	0.011	1.6986e-21
GCHFR	9.53317e-26	0.313556	0.025	0.014	1.72407e-21
ZNF697	9.94857e-26	0.179878	0.074	0.054	1.7992e-21
DUSP8	1.02977e-25	0.183563	0.063	0.044	1.86233e-21
SELENOK	1.04239e-25	0.169948	0.048	0.031	1.88516e-21
IDH3A	1.10531e-25	0.290737	0.042	0.027	1.99896e-21
NUDT2	1.11363e-25	0.125591	0.045	0.029	2.01401e-21
HIST1H1D	1.2056e-25	0.269767	0.098	0.075	2.18033e-21
SLC1A5	1.23055e-25	0.135816	0.075	0.054	2.22545e-21
OGFOD1	1.2383e-25	0.133752	0.066	0.047	2.23947e-21
TSPOAP1	1.29829e-25	0.126955	0.074	0.053	2.34796e-21
HAX1	1.40241e-25	0.143975	0.052	0.035	2.53626e-21
SLC25A27	1.45979e-25	0.168892	0.062	0.043	2.64002e-21
WDR89	1.50557e-25	0.170195	0.065	0.046	2.72283e-21
HEY1	1.58354e-25	0.223498	0.017	0.008	2.86383e-21
UQCRC2	1.61572e-25	0.119281	0.093	0.07	2.92203e-21
ZC3H12C	1.71657e-25	0.114986	0.068	0.049	3.10441e-21
BTG3	1.72301e-25	0.288374	0.044	0.029	3.11607e-21
ARHGEF3	1.8015e-25	0.634808	0.019	0.01	3.25801e-21
CCDC32	2.07568e-25	0.107305	0.066	0.047	3.75387e-21
TUSC2	2.18981e-25	0.14708	0.073	0.052	3.96028e-21
ADAM15	2.19743e-25	0.283551	0.037	0.023	3.97404e-21
ZBTB16	2.29909e-25	0.438952	0.027	0.015	4.15791e-21
SLC25A13	2.35851e-25	0.149282	0.035	0.021	4.26537e-21
DOCK3	2.41503e-25	0.195855	0.056	0.038	4.36758e-21
FAM20C	2.44721e-25	0.148059	0.079	0.058	4.42578e-21
KIAA1191	2.49824e-25	0.120762	0.085	0.063	4.51807e-21
TAFA5	2.50931e-25	0.124922	0.072	0.052	4.5381e-21
PPP2CB	2.62647e-25	0.162203	0.076	0.055	4.74996e-21
GBX2	2.78822e-25	-0.281255	0.014	0.006	5.04249e-21
CLASRP	2.98166e-25	0.105194	0.082	0.06	5.39233e-21
DPF3	3.24901e-25	0.782992	0.022	0.011	5.87584e-21
NDUFAF7	3.34236e-25	0.197916	0.049	0.033	6.04466e-21
RUSC1	3.39683e-25	0.240658	0.069	0.049	6.14317e-21
PHC1	3.76362e-25	0.116157	0.082	0.061	6.80651e-21
KLF3	4.30582e-25	0.171744	0.056	0.038	7.78708e-21
APIP	4.39396e-25	0.149639	0.069	0.049	7.94648e-21
COL4A5	4.81691e-25	0.220227	0.031	0.019	8.71138e-21
ERO1B	4.91348e-25	0.313163	0.029	0.017	8.88603e-21
SAC3D1	5.16574e-25	0.172037	0.047	0.031	9.34224e-21
SYNGAP1	6.15269e-25	0.100752	0.081	0.059	1.11271e-20
RANGAP1	7.14599e-25	0.202072	0.08	0.059	1.29235e-20
ATOX1	7.24432e-25	0.481924	0.029	0.017	1.31013e-20
HIST1H2AC	7.8893e-25	1.29695	0.012	0.004	1.42678e-20
WRNIP1	8.65503e-25	0.187354	0.071	0.051	1.56526e-20
LRRC3	9.29617e-25	0.17226	0.044	0.029	1.68121e-20
SEPTIN8	9.30083e-25	0.171488	0.053	0.036	1.68205e-20
RBBP5	9.71534e-25	0.146455	0.067	0.048	1.75702e-20
ABCF3	1.03456e-24	0.134297	0.064	0.045	1.871e-20
PHLDA1	1.04683e-24	0.292133	0.056	0.039	1.8932e-20
CACNB2	1.14219e-24	0.136384	0.024	0.013	2.06566e-20
RAPGEFL1	1.3063e-24	0.176137	0.055	0.038	2.36244e-20
CPSF1	1.36703e-24	0.182092	0.044	0.029	2.47227e-20
PARD6G	1.4066e-24	0.252944	0.06	0.042	2.54384e-20
LYRM4	1.44217e-24	0.276964	0.035	0.021	2.60816e-20
NECAB3	1.46753e-24	0.143138	0.04	0.026	2.65402e-20
EMC6	1.57157e-24	0.1633	0.045	0.03	2.84218e-20
VOPP1	1.58907e-24	0.218172	0.071	0.051	2.87382e-20
NBL1	1.60583e-24	0.412534	0.036	0.023	2.90414e-20
PGBD5	1.6094e-24	0.212669	0.043	0.028	2.91059e-20
EML4	1.63278e-24	0.166518	0.063	0.044	2.95289e-20
ILDR2	1.64272e-24	-0.351824	0.027	0.015	2.97086e-20
HPCA	1.93505e-24	0.306432	0.043	0.028	3.49953e-20
INPP5B	2.01913e-24	0.225899	0.052	0.036	3.65159e-20
QPCTL	2.09858e-24	0.116698	0.045	0.03	3.79528e-20
KCNF1	2.10522e-24	0.484108	0.027	0.016	3.80729e-20
MAVS	2.14727e-24	0.113744	0.059	0.041	3.88334e-20
DHRSX	2.1829e-24	0.166524	0.081	0.06	3.94778e-20
RAP2C	2.42333e-24	0.164221	0.063	0.045	4.38259e-20
DIO3	2.71871e-24	0.425252	0.011	0.004	4.91679e-20
DYRK2	3.20855e-24	0.128483	0.087	0.065	5.80267e-20
B4GAT1	3.4831e-24	0.248727	0.046	0.031	6.29919e-20
ZRSR2	3.60444e-24	0.644631	0.019	0.01	6.51862e-20
SIAH2	3.89224e-24	0.142863	0.068	0.049	7.03911e-20
APBA1	4.09989e-24	0.301071	0.036	0.022	7.41466e-20
CDH24	4.23709e-24	0.248851	0.049	0.033	7.66277e-20
PEX11B	4.43386e-24	0.189846	0.072	0.052	8.01864e-20
RSAD1	4.68688e-24	0.130849	0.059	0.041	8.47623e-20
NTRK3	4.82105e-24	0.153291	0.104	0.079	8.71887e-20
NES	5.57202e-24	-0.120521	0.202	0.162	1.0077e-19
QDPR	5.84191e-24	0.371134	0.029	0.017	1.05651e-19
STX1A	5.91827e-24	0.332428	0.048	0.032	1.07032e-19
UNC80	6.20997e-24	0.27128	0.033	0.021	1.12307e-19
INF2	6.37252e-24	0.236427	0.026	0.015	1.15247e-19
ABLIM3	6.4487e-24	0.212401	0.055	0.038	1.16625e-19
SUB1	6.60139e-24	0.172992	0.07	0.051	1.19386e-19
RNF13	7.62214e-24	0.117697	0.051	0.035	1.37846e-19
ICA1L	7.94991e-24	0.156667	0.063	0.044	1.43774e-19
ATMIN	8.78431e-24	0.106907	0.055	0.038	1.58864e-19
NPM3	9.43429e-24	0.14138	0.042	0.027	1.70619e-19
CDH4	9.8675e-24	0.240566	0.05	0.034	1.78454e-19
SOX9	9.99438e-24	0.155221	0.125	0.098	1.80748e-19
SPTBN4	1.02729e-23	0.290157	0.044	0.029	1.85786e-19
HGS	1.04516e-23	0.14792	0.051	0.035	1.89017e-19
SCYL1	1.07869e-23	0.14736	0.051	0.035	1.95081e-19
TTLL3	1.09307e-23	0.24913	0.04	0.026	1.97682e-19
LMO4	1.15039e-23	-0.115826	0.093	0.07	2.08047e-19
RASL10B	1.17692e-23	0.200743	0.038	0.025	2.12845e-19
UBE2E2	1.21394e-23	0.155246	0.061	0.043	2.19541e-19
TUBG2	1.3006e-23	0.12133	0.067	0.048	2.35213e-19
VIM	1.35243e-23	-0.257331	0.449	0.463	2.44587e-19
PSMB10	1.44719e-23	0.238843	0.036	0.023	2.61724e-19
LRRC8B	1.50151e-23	0.134223	0.088	0.066	2.71548e-19
COL5A1	1.59321e-23	0.186168	0.017	0.008	2.88132e-19
GORASP1	1.80065e-23	0.126654	0.05	0.034	3.25648e-19
ZNF514	1.81852e-23	0.259013	0.053	0.037	3.28879e-19
NUDCD1	1.93427e-23	0.105723	0.08	0.059	3.49813e-19
ROBO2	2.12121e-23	0.211882	0.111	0.087	3.8362e-19
MPC2	2.12488e-23	0.276032	0.051	0.035	3.84284e-19
MID2	2.21122e-23	0.385557	0.022	0.012	3.999e-19
SEPTIN4	2.22719e-23	0.352255	0.029	0.018	4.02788e-19
DYNLL1	2.30877e-23	0.154179	0.05	0.034	4.17542e-19
DNAJC12	2.36082e-23	0.152585	0.048	0.032	4.26954e-19
NOC2L	2.38648e-23	0.140347	0.072	0.053	4.31594e-19
HSPA14	2.58135e-23	0.12347	0.051	0.035	4.66837e-19
RPN2	2.62962e-23	0.118643	0.066	0.047	4.75566e-19
GTF2H3	2.97313e-23	0.147046	0.049	0.033	5.37691e-19
AMMECR1	3.05268e-23	0.906798	0.016	0.007	5.52078e-19
COL6A2	3.11796e-23	0.349956	0.023	0.013	5.63882e-19
KARS	3.22051e-23	0.324816	0.035	0.022	5.8243e-19
IK	3.39582e-23	0.234459	0.046	0.031	6.14134e-19
UXS1	3.41885e-23	0.32995	0.04	0.026	6.18299e-19
GRIN2B	3.83024e-23	0.154052	0.093	0.071	6.92698e-19
ABTB2	3.89985e-23	0.384949	0.028	0.016	7.05288e-19
INSM1	4.02816e-23	0.318943	0.022	0.012	7.28493e-19
STAU2	4.48837e-23	0.102736	0.106	0.082	8.11722e-19
SACS	4.53653e-23	0.100952	0.047	0.031	8.20432e-19
SDHA	4.54161e-23	0.101206	0.085	0.064	8.21351e-19
MTMR6	4.56231e-23	0.116554	0.067	0.048	8.25093e-19
CEBPZOS	4.6002e-23	-0.15868	0.084	0.062	8.31947e-19
YAF2	4.7062e-23	0.120157	0.082	0.061	8.51116e-19
PLEKHA5	4.86639e-23	0.140749	0.089	0.068	8.80086e-19
NUDT7	5.60609e-23	0.340643	0.027	0.016	1.01386e-18
FRMD3	5.71058e-23	0.861541	0.015	0.007	1.03276e-18
CDK5R2	5.8573e-23	0.100676	0.058	0.041	1.05929e-18
SLC9A3R1	6.34078e-23	0.375177	0.017	0.008	1.14673e-18
PURG	6.34734e-23	0.119219	0.103	0.08	1.14792e-18
DNAJB5	6.73952e-23	0.106614	0.071	0.052	1.21884e-18
TBKBP1	7.12773e-23	0.175336	0.063	0.045	1.28905e-18
PLPPR2	7.37904e-23	0.197428	0.048	0.033	1.3345e-18
ZC3H3	8.74185e-23	0.105477	0.067	0.049	1.58096e-18
PRUNE2	9.24007e-23	0.208183	0.046	0.031	1.67107e-18
ITPK1	9.32475e-23	0.27968	0.034	0.021	1.68638e-18
RBM17	9.35735e-23	0.152849	0.085	0.064	1.69228e-18
C1QTNF4	9.55413e-23	0.185575	0.037	0.024	1.72786e-18
GPRIN1	9.87736e-23	0.176308	0.084	0.063	1.78632e-18
DHCR24	1.00285e-22	0.134994	0.083	0.062	1.81365e-18
ZNF83	1.05444e-22	0.122704	0.07	0.051	1.90695e-18
MDGA2	1.1151e-22	0.341131	0.034	0.021	2.01666e-18
INPP5A	1.17453e-22	0.10503	0.06	0.043	2.12414e-18
TNS1	1.19562e-22	0.148201	0.028	0.017	2.16227e-18
RASSF10	1.24848e-22	0.174553	0.015	0.007	2.25787e-18
PDE9A	1.26328e-22	0.24001	0.039	0.026	2.28463e-18
RSU1	1.27472e-22	0.238014	0.031	0.019	2.30534e-18
CHAC1	1.43389e-22	0.304327	0.031	0.019	2.59319e-18
PPA1	1.59224e-22	0.178517	0.061	0.044	2.87957e-18
MEF2A	1.75201e-22	0.171239	0.06	0.042	3.16852e-18
GAN	1.75757e-22	0.150542	0.052	0.036	3.17856e-18
BTBD3	1.91624e-22	0.297545	0.056	0.04	3.46552e-18
WNT7A	1.94875e-22	0.155073	0.063	0.045	3.52431e-18
ADAM22	1.9624e-22	0.228629	0.064	0.046	3.549e-18
FAM207A	1.96853e-22	0.11685	0.049	0.033	3.56009e-18
TM9SF2	2.05447e-22	0.305004	0.045	0.031	3.71551e-18
UBE2L3	2.13811e-22	0.103393	0.072	0.053	3.86678e-18
CDKN2AIP	2.13901e-22	0.106482	0.05	0.035	3.8684e-18
PRMT3	2.15415e-22	0.177806	0.044	0.03	3.89578e-18
PICALM	2.35118e-22	0.107119	0.072	0.053	4.25211e-18
DDX51	2.48981e-22	0.112374	0.053	0.037	4.50283e-18
NR2C1	2.77855e-22	0.208265	0.055	0.038	5.02502e-18
PHLDA3	3.39204e-22	0.138726	0.06	0.043	6.13451e-18
ULK2	3.54851e-22	0.181427	0.044	0.03	6.41748e-18
SESN3	3.58494e-22	-0.105865	0.072	0.053	6.48336e-18
SELENOM	3.63357e-22	0.174502	0.053	0.037	6.57131e-18
BRAT1	4.02755e-22	0.135022	0.054	0.038	7.28382e-18
DIRAS2	4.40142e-22	0.328184	0.042	0.028	7.95998e-18
TNR	4.48007e-22	0.741059	0.018	0.009	8.1022e-18
VPS13A	4.8341e-22	0.299919	0.042	0.028	8.74248e-18
CDH11	5.77165e-22	0.298362	0.019	0.01	1.0438e-17
DGKI	5.7984e-22	0.19796	0.054	0.038	1.04864e-17
SEH1L	5.88123e-22	0.113473	0.08	0.06	1.06362e-17
RBM6	6.07254e-22	0.155686	0.069	0.05	1.09822e-17
SYNDIG1	6.11492e-22	0.728247	0.01	0.004	1.10588e-17
TMOD3	6.21186e-22	0.101399	0.063	0.045	1.12341e-17
UCK2	6.22248e-22	0.176485	0.059	0.042	1.12534e-17
ABHD5	6.41212e-22	0.157727	0.049	0.034	1.15963e-17
STAU1	6.59617e-22	0.219058	0.06	0.043	1.19292e-17
CRYAB	7.16509e-22	0.294779	0.015	0.007	1.29581e-17
BOP1	7.42985e-22	0.244417	0.042	0.028	1.34369e-17
PRRT4	7.82403e-22	0.139149	0.055	0.039	1.41498e-17
SOAT1	8.3018e-22	0.268406	0.043	0.029	1.50138e-17
TTC27	8.33908e-22	0.155457	0.037	0.024	1.50812e-17
PRCP	8.57451e-22	0.190566	0.051	0.035	1.5507e-17
SDHB	9.3402e-22	0.147795	0.069	0.051	1.68917e-17
AFF2	9.64921e-22	-0.126546	0.144	0.113	1.74506e-17
SDHAF4	9.89821e-22	0.110312	0.076	0.057	1.79009e-17
DHX33	1.05714e-21	0.159162	0.05	0.035	1.91184e-17
FAM8A1	1.13583e-21	0.104628	0.074	0.055	2.05415e-17
PCID2	1.15008e-21	0.145743	0.085	0.064	2.07992e-17
NAA60	1.18178e-21	0.175102	0.055	0.039	2.13725e-17
ZNF275	1.19403e-21	0.15496	0.044	0.03	2.1594e-17
SPARCL1	1.20781e-21	-1.75446	0.033	0.045	2.18432e-17
IER5	1.22488e-21	0.121787	0.062	0.045	2.2152e-17
AGPS	1.23341e-21	0.11358	0.049	0.034	2.23063e-17
DZIP1	1.29663e-21	0.120929	0.065	0.047	2.34495e-17
PPP3CC	1.39278e-21	0.154933	0.057	0.04	2.51884e-17
DPP9	1.41167e-21	0.119317	0.053	0.037	2.55301e-17
NAA10	1.49325e-21	0.175601	0.058	0.042	2.70055e-17
TCP11L1	1.5336e-21	0.103548	0.075	0.056	2.77352e-17
ZBTB41	1.57731e-21	0.117876	0.064	0.046	2.85257e-17
SH2D3C	1.58566e-21	0.239486	0.042	0.028	2.86766e-17
CARS	1.67327e-21	0.238364	0.038	0.025	3.02611e-17
TARS2	1.81083e-21	0.189525	0.041	0.027	3.27489e-17
CACNA1I	1.84096e-21	0.484433	0.028	0.017	3.32937e-17
FBXL20	1.88169e-21	0.126438	0.049	0.034	3.40303e-17
SLC27A5	2.08139e-21	0.11852	0.039	0.026	3.76419e-17
CCN2	2.12214e-21	0.163049	0.011	0.005	3.83788e-17
RAB39B	2.35524e-21	0.145599	0.05	0.035	4.25945e-17
EML5	2.43793e-21	0.237405	0.044	0.03	4.409e-17
ZC3H7A	2.57753e-21	0.13292	0.066	0.048	4.66147e-17
OTUD6B	2.62293e-21	0.11184	0.048	0.033	4.74357e-17
ACAA1	2.66439e-21	0.109636	0.069	0.05	4.81856e-17
PLEKHH3	2.68035e-21	0.188778	0.04	0.027	4.8474e-17
SC5D	2.73047e-21	0.193703	0.065	0.047	4.93805e-17
ENOX1	3.014e-21	0.343589	0.038	0.025	5.45082e-17
PELI2	3.08772e-21	0.239041	0.05	0.035	5.58414e-17
FAM217B	3.10117e-21	0.133477	0.048	0.033	5.60847e-17
ZNF573	3.12417e-21	0.15218	0.047	0.032	5.65006e-17
CDC42EP1	3.39884e-21	0.582124	0.015	0.007	6.14681e-17
KIF1BP	3.42424e-21	0.147729	0.064	0.047	6.19273e-17
FBXO7	3.44604e-21	0.115535	0.044	0.03	6.23216e-17
IDH1	3.59233e-21	0.241134	0.035	0.023	6.49674e-17
GRIP2	3.76997e-21	0.183321	0.059	0.042	6.81798e-17
GDPD5	3.81023e-21	0.339645	0.043	0.029	6.89079e-17
NBEA	3.84607e-21	0.110712	0.08	0.06	6.95563e-17
TMEM159	3.85022e-21	0.82594	0.017	0.009	6.96312e-17
PDCD5	4.0102e-21	0.111398	0.075	0.056	7.25245e-17
LSM10	4.20741e-21	0.22151	0.043	0.029	7.6091e-17
SRPK2	4.46137e-21	0.420626	0.031	0.02	8.06839e-17
NLN	4.53542e-21	0.109311	0.052	0.037	8.20231e-17
MYC	4.60726e-21	0.418784	0.037	0.024	8.33223e-17
TMEM218	4.79321e-21	0.122747	0.038	0.025	8.66852e-17
TMEM121	5.22361e-21	0.146817	0.021	0.011	9.44689e-17
GDPD1	5.32364e-21	0.182892	0.046	0.031	9.62781e-17
PTPN5	5.33144e-21	0.117246	0.066	0.049	9.64191e-17
PIWIL2	5.4368e-21	0.547891	0.028	0.018	9.83245e-17
CSDC2	5.4653e-21	0.113697	0.05	0.035	9.88399e-17
EEFSEC	5.72463e-21	0.254728	0.041	0.028	1.0353e-16
NBR1	5.74798e-21	0.257971	0.04	0.027	1.03952e-16
TSPAN33	5.94617e-21	0.246156	0.023	0.014	1.07536e-16
L3MBTL1	6.80418e-21	0.104015	0.054	0.038	1.23054e-16
ATG2B	7.07519e-21	0.125806	0.065	0.048	1.27955e-16
PMS1	7.50477e-21	0.199167	0.059	0.043	1.35724e-16
ATP7B	7.67082e-21	0.373776	0.025	0.015	1.38727e-16
PDGFA	7.7831e-21	0.44447	0.018	0.01	1.40757e-16
RNF44	7.92291e-21	0.15095	0.077	0.058	1.43286e-16
ATP2B2	8.27173e-21	0.32178	0.04	0.027	1.49594e-16
KNOP1	8.41969e-21	0.193906	0.043	0.03	1.5227e-16
DPH3	8.774e-21	-0.101605	0.084	0.063	1.58678e-16
ISLR2	8.80874e-21	-0.433946	0.245	0.257	1.59306e-16
THOP1	9.29462e-21	0.1137	0.057	0.041	1.68093e-16
THBS2	1.0333e-20	0.278771	0.014	0.006	1.86872e-16
DKC1	1.18409e-20	0.105135	0.066	0.049	2.14143e-16
FBXO31	1.21929e-20	0.197978	0.049	0.034	2.20508e-16
KDM1B	1.26189e-20	0.120734	0.051	0.036	2.28214e-16
ARHGAP20	1.27546e-20	0.535002	0.01	0.004	2.30667e-16
SRPK1	1.32778e-20	0.25041	0.048	0.033	2.40129e-16
GNB3	1.40917e-20	0.21881	0.039	0.026	2.54848e-16
TRIM36	1.45137e-20	0.140198	0.072	0.053	2.6248e-16
UGGT2	1.51362e-20	0.292544	0.031	0.019	2.73738e-16
HACD2	1.53766e-20	0.154754	0.044	0.03	2.78086e-16
VPS8	1.56023e-20	0.287465	0.031	0.019	2.82167e-16
VTA1	1.57546e-20	0.272394	0.045	0.031	2.84921e-16
SPATC1L	1.61472e-20	0.315169	0.042	0.029	2.92023e-16
NUAK1	1.66446e-20	0.127421	0.049	0.034	3.01017e-16
KCND3	1.67865e-20	0.301021	0.018	0.01	3.03583e-16
POLH	1.71478e-20	0.180909	0.053	0.038	3.10119e-16
UPP1	1.72516e-20	0.51425	0.019	0.011	3.11996e-16
SNAP91	1.76406e-20	0.115925	0.087	0.067	3.1903e-16
SOWAHA	1.85639e-20	0.679663	0.015	0.007	3.35729e-16
SHISAL1	1.89772e-20	0.233383	0.027	0.016	3.43202e-16
MEIS1	1.95678e-20	0.208493	0.057	0.041	3.53885e-16
BRMS1L	2.1124e-20	0.20002	0.039	0.026	3.82028e-16
FAM102B	2.21213e-20	0.211412	0.049	0.034	4.00063e-16
BORCS5	2.42684e-20	0.117263	0.056	0.041	4.38894e-16
CYTH3	2.43341e-20	0.196735	0.037	0.024	4.40083e-16
STK24	2.66602e-20	0.118551	0.06	0.043	4.82149e-16
CCDC28B	2.68978e-20	0.248334	0.045	0.031	4.86447e-16
LIAS	2.70445e-20	0.168251	0.049	0.034	4.891e-16
CRISPLD1	2.83628e-20	-0.447469	0.043	0.029	5.12942e-16
COL7A1	2.94138e-20	0.23431	0.04	0.027	5.31948e-16
EFNB1	3.19603e-20	0.130906	0.114	0.09	5.78002e-16
SNRPA1	3.32719e-20	0.104746	0.074	0.056	6.01722e-16
SLC2A3	3.33394e-20	0.368564	0.022	0.013	6.02944e-16
USP48	3.45916e-20	0.104839	0.094	0.073	6.25589e-16
NDUFAF6	3.9186e-20	0.223219	0.04	0.027	7.08679e-16
KAT8	3.98824e-20	0.438818	0.027	0.016	7.21273e-16
LRATD2	4.06875e-20	0.317121	0.02	0.011	7.35833e-16
TMEM116	4.19656e-20	0.141936	0.049	0.034	7.58947e-16
FADS3	4.42251e-20	0.332291	0.021	0.012	7.9981e-16
PKNOX2	4.84457e-20	0.177679	0.044	0.03	8.7614e-16
PTPRN	4.96237e-20	-0.126039	0.101	0.078	8.97445e-16
PCBP3	5.01548e-20	0.651513	0.02	0.012	9.0705e-16
GLO1	5.17053e-20	0.118714	0.063	0.046	9.35091e-16
TPRA1	5.228e-20	0.104344	0.043	0.029	9.45484e-16
BAG1	5.79629e-20	0.191818	0.028	0.017	1.04826e-15
CPOX	6.02339e-20	0.123443	0.047	0.033	1.08933e-15
LRRN2	6.03966e-20	0.179799	0.023	0.013	1.09227e-15
SUPT4H1	6.54496e-20	0.186061	0.035	0.023	1.18366e-15
FLNA	6.56445e-20	0.127909	0.043	0.03	1.18718e-15
KLHL28	6.56935e-20	0.177924	0.045	0.031	1.18807e-15
BMP7	6.7654e-20	-0.156724	0.046	0.032	1.22352e-15
TMEM132E	6.93719e-20	0.270979	0.046	0.032	1.25459e-15
TBC1D12	7.2991e-20	0.150088	0.052	0.037	1.32004e-15
PARVA	7.67938e-20	0.410341	0.017	0.009	1.38882e-15
PRKD1	9.20111e-20	0.446939	0.031	0.02	1.66402e-15
ECPAS	9.44844e-20	0.120847	0.071	0.053	1.70875e-15
RAB9B	9.54769e-20	0.273914	0.025	0.015	1.7267e-15
SYN2	1.01102e-19	0.286172	0.03	0.019	1.82843e-15
MCCC1	1.01347e-19	0.119168	0.048	0.034	1.83286e-15
MIOS	1.01882e-19	0.134222	0.064	0.047	1.84254e-15
POLR3A	1.09115e-19	0.125637	0.061	0.044	1.97335e-15
PSMC4	1.17395e-19	-0.117344	0.153	0.123	2.12309e-15
CCM2	1.28026e-19	0.106767	0.052	0.037	2.31534e-15
MEIS2	1.3416e-19	-0.248455	0.397	0.404	2.42629e-15
ADSL	1.35966e-19	-0.114979	0.084	0.063	2.45895e-15
SF3B6	1.38944e-19	0.23039	0.034	0.022	2.5128e-15
TMSB15B.1	1.39572e-19	0.72281	0.014	0.007	2.52416e-15
SLC66A2	1.43194e-19	0.152377	0.064	0.048	2.58967e-15
PTMS	1.46874e-19	0.330785	0.058	0.043	2.65622e-15
PDZD8	1.81931e-19	0.130036	0.056	0.04	3.29022e-15
UBE2E1	1.92809e-19	0.106228	0.067	0.05	3.48695e-15
ATP1A1	1.94119e-19	0.122944	0.071	0.053	3.51065e-15
IQSEC2	2.01755e-19	0.405876	0.03	0.019	3.64874e-15
AIMP1	2.07919e-19	0.153224	0.052	0.037	3.76021e-15
PAQR7	2.11288e-19	0.100402	0.044	0.03	3.82115e-15
GALNT14	2.16982e-19	0.484687	0.012	0.005	3.92412e-15
PRELID3A	2.19286e-19	0.491548	0.021	0.012	3.96579e-15
TIMM23	2.21363e-19	0.206927	0.044	0.031	4.00334e-15
GPR12	2.21493e-19	0.197871	0.032	0.021	4.0057e-15
KCNJ3	2.23626e-19	0.906507	0.014	0.007	4.04428e-15
PHF20	2.31088e-19	0.123548	0.069	0.051	4.17922e-15
MPZL1	2.3507e-19	0.182822	0.038	0.025	4.25124e-15
TENT2	2.38771e-19	0.13472	0.041	0.028	4.31816e-15
GPI	2.53757e-19	-0.602431	0.158	0.172	4.58919e-15
KIAA1109	2.5495e-19	0.19714	0.035	0.023	4.61078e-15
GRK6	2.65446e-19	0.167471	0.041	0.028	4.80059e-15
GRIP1	2.68351e-19	0.4671	0.032	0.021	4.85314e-15
KIAA0319L	2.68355e-19	0.133872	0.038	0.026	4.85321e-15
DENND4C	2.80191e-19	0.149175	0.061	0.045	5.06725e-15
FAN1	2.85935e-19	-0.798162	0.028	0.04	5.17113e-15
UBE2T	2.93306e-19	0.287261	0.04	0.028	5.30445e-15
PCK2	2.98769e-19	0.224368	0.02	0.012	5.40323e-15
ALDH7A1	3.04674e-19	0.11208	0.043	0.03	5.51003e-15
NETO2	3.05642e-19	0.231298	0.05	0.036	5.52753e-15
SLC7A6	3.14236e-19	0.194752	0.05	0.036	5.68295e-15
MCU	3.22924e-19	0.220589	0.031	0.02	5.84009e-15
NDUFB4	3.37692e-19	0.109268	0.052	0.037	6.10715e-15
ANAPC4	3.39112e-19	0.277985	0.04	0.027	6.13285e-15
BTRC	3.42653e-19	0.105585	0.058	0.042	6.19687e-15
ADCK2	3.50448e-19	0.194828	0.039	0.026	6.33786e-15
PEX5	3.9205e-19	0.125305	0.038	0.026	7.09022e-15
GYG1	4.00446e-19	0.478655	0.013	0.006	7.24207e-15
SLCO3A1	4.30844e-19	0.261338	0.032	0.021	7.79181e-15
ARRB1	4.40433e-19	0.126011	0.049	0.035	7.96522e-15
FNDC5	4.50692e-19	0.233957	0.027	0.017	8.15076e-15
PUDP	4.88311e-19	0.729504	0.013	0.006	8.8311e-15
TRAF6	5.10078e-19	0.118077	0.047	0.033	9.22475e-15
PORCN	5.56486e-19	0.104676	0.047	0.033	1.0064e-14
LAP3	5.76776e-19	0.272933	0.023	0.014	1.0431e-14
SMC6	5.92827e-19	0.207574	0.052	0.038	1.07213e-14
CA12	5.94351e-19	-0.114746	0.045	0.031	1.07488e-14
DAZAP1	6.61826e-19	0.127422	0.069	0.052	1.19691e-14
PTPN9	6.64181e-19	0.122101	0.06	0.044	1.20117e-14
PPIL6	6.67741e-19	0.344286	0.021	0.012	1.20761e-14
DISP2	6.90299e-19	0.135235	0.049	0.035	1.24841e-14
FBF1	7.16038e-19	0.152769	0.042	0.029	1.29495e-14
LHX8	7.22117e-19	-0.329515	0.06	0.043	1.30595e-14
MAD2L1	7.76807e-19	0.280031	0.035	0.024	1.40485e-14
GNAI1	7.93119e-19	0.115559	0.043	0.03	1.43436e-14
GLS	7.94889e-19	0.211722	0.058	0.043	1.43756e-14
SLC25A33	8.0665e-19	0.113505	0.045	0.031	1.45883e-14
CSMD3	8.19465e-19	-0.117645	0.019	0.011	1.482e-14
WFDC2	8.5832e-19	0.330641	0.019	0.011	1.55227e-14
PLEKHA8	8.86144e-19	0.127129	0.059	0.043	1.60259e-14
C2CD2L	9.19762e-19	0.119896	0.057	0.042	1.66339e-14
RGS17	9.27049e-19	0.123697	0.06	0.044	1.67657e-14
NCK2	9.50673e-19	0.132271	0.058	0.042	1.71929e-14
KCNC2	9.82465e-19	0.865972	0.016	0.008	1.77679e-14
TAPBP	9.85494e-19	0.149699	0.04	0.027	1.78227e-14
SLC16A3	1.10866e-18	-0.649904	0.137	0.151	2.005e-14
UST	1.11696e-18	0.570329	0.015	0.008	2.02002e-14
CREB3L2	1.16126e-18	0.324442	0.019	0.011	2.10013e-14
ENDOG	1.18121e-18	0.103436	0.061	0.045	2.13623e-14
FRMD5	1.19859e-18	0.264233	0.028	0.018	2.16765e-14
LSM11	1.22716e-18	0.131913	0.058	0.042	2.21932e-14
PSMG1	1.25364e-18	0.136566	0.032	0.021	2.2672e-14
DLX1	1.29796e-18	0.121606	0.136	0.111	2.34736e-14
GSK3A	1.32635e-18	0.112652	0.059	0.044	2.39871e-14
SHISA9	1.33192e-18	0.464863	0.017	0.01	2.40878e-14
RRP12	1.37996e-18	0.173988	0.043	0.03	2.49566e-14
HIST1H2BB	1.37998e-18	1.81638	0.012	0.006	2.49569e-14
DYNLT3	1.40594e-18	0.370402	0.017	0.01	2.54265e-14
PRKCE	1.50376e-18	0.274719	0.033	0.022	2.71955e-14
CAMTA2	1.61711e-18	0.121314	0.044	0.031	2.92454e-14
CTH	1.78991e-18	0.257135	0.031	0.02	3.23706e-14
PVR	1.82004e-18	0.111454	0.045	0.032	3.29154e-14
ZIC5	1.86499e-18	-1.37756	0.006	0.013	3.37283e-14
SH3BP5	1.88823e-18	0.172654	0.069	0.052	3.41487e-14
XKR4	1.9125e-18	0.139223	0.038	0.026	3.45876e-14
JAM3	1.94237e-18	0.148558	0.037	0.025	3.51278e-14
TRIM22	2.10288e-18	0.698898	0.01	0.004	3.80305e-14
SLC25A37	2.14643e-18	0.242724	0.043	0.03	3.88182e-14
PHF1	2.18178e-18	0.192574	0.043	0.03	3.94575e-14
EPHB6	2.56989e-18	0.239714	0.032	0.021	4.64764e-14
MASP1	2.65077e-18	-0.149986	0.035	0.023	4.79391e-14
ZNF770	2.69943e-18	0.143999	0.038	0.026	4.88193e-14
WDYHV1	2.71257e-18	0.322666	0.03	0.019	4.90569e-14
KCNK3	2.72971e-18	0.119838	0.031	0.02	4.93668e-14
DUSP22	2.78544e-18	0.110551	0.044	0.031	5.03746e-14
PWWP2B	2.81159e-18	0.114251	0.046	0.032	5.08477e-14
CC2D1A	2.83342e-18	0.152406	0.044	0.031	5.12425e-14
THY1	2.84484e-18	0.149235	0.069	0.052	5.14489e-14
ATG4C	3.01186e-18	0.132005	0.054	0.039	5.44694e-14
ASTN1	3.02113e-18	0.104207	0.068	0.051	5.46372e-14
KLC4	3.39132e-18	0.111072	0.042	0.03	6.13321e-14
PPM1D	3.45642e-18	0.152958	0.036	0.024	6.25093e-14
PXDC1	3.46448e-18	0.155902	0.018	0.01	6.26552e-14
C16orf58	3.56231e-18	-0.104524	0.153	0.123	6.44243e-14
WWC1	3.57235e-18	0.353327	0.015	0.008	6.4606e-14
C6orf136	3.58333e-18	0.1627	0.039	0.027	6.48046e-14
TNNI1	3.67231e-18	0.30775	0.018	0.01	6.64137e-14
NR1H3	3.963e-18	0.194701	0.028	0.018	7.16709e-14
MICAL1	4.15927e-18	0.132994	0.049	0.035	7.52204e-14
AURKAIP1	4.20165e-18	0.120929	0.044	0.031	7.59868e-14
ABHD8	4.39242e-18	0.18334	0.048	0.035	7.94368e-14
ZFPL1	4.84518e-18	0.145528	0.044	0.031	8.76251e-14
WDCP	4.84801e-18	0.466014	0.02	0.011	8.76762e-14
THSD7A	4.89979e-18	0.277702	0.03	0.019	8.86126e-14
CAT	5.08906e-18	0.158811	0.031	0.02	9.20357e-14
TMEM268	5.10305e-18	0.127148	0.038	0.026	9.22887e-14
UNC45A	5.10786e-18	0.111662	0.047	0.034	9.23757e-14
C3orf14	5.12412e-18	0.220914	0.042	0.029	9.26698e-14
PRICKLE2	5.1689e-18	0.199567	0.031	0.02	9.34796e-14
YBEY	5.63453e-18	0.113739	0.04	0.028	1.01901e-13
WFS1	5.67143e-18	0.244188	0.02	0.011	1.02568e-13
CA5B	6.09904e-18	0.231164	0.03	0.02	1.10301e-13
PPP1R14C	6.42803e-18	0.321742	0.016	0.008	1.16251e-13
SNF8	6.53828e-18	-0.110097	0.135	0.108	1.18245e-13
TPX2	7.36537e-18	0.190168	0.043	0.03	1.33203e-13
ZBTB8B	7.5454e-18	0.138361	0.038	0.026	1.36459e-13
TRAF2	7.99511e-18	0.135789	0.038	0.026	1.44592e-13
ARL2BP	8.18522e-18	0.498093	0.018	0.01	1.4803e-13
COQ8A	8.62628e-18	0.169581	0.037	0.025	1.56006e-13
HTATSF1	8.69837e-18	0.184498	0.049	0.035	1.5731e-13
ADCY1	8.92881e-18	0.211398	0.05	0.036	1.61478e-13
GOLGA7B	9.07162e-18	0.192743	0.044	0.031	1.6406e-13
PDPN	9.19379e-18	0.116573	0.023	0.014	1.6627e-13
IGSF21	9.66797e-18	0.383389	0.022	0.013	1.74845e-13
BAK1	9.67868e-18	0.143632	0.033	0.022	1.75039e-13
CPEB3	9.76887e-18	0.102331	0.063	0.048	1.7667e-13
TPPP3	9.97847e-18	0.439343	0.013	0.006	1.80461e-13
PDIA4	1.09616e-17	0.185654	0.025	0.015	1.9824e-13
IGFBP4	1.10946e-17	0.398367	0.02	0.012	2.00646e-13
PIGZ	1.13823e-17	0.464543	0.02	0.012	2.0585e-13
ATP5PD	1.14759e-17	0.235535	0.039	0.027	2.07541e-13
ACTN1	1.16144e-17	0.189522	0.033	0.022	2.10046e-13
RRM1	1.16181e-17	0.102537	0.059	0.044	2.10113e-13
SLC7A1	1.16559e-17	0.400561	0.026	0.017	2.10797e-13
TMEM242	1.1925e-17	0.133569	0.054	0.04	2.15663e-13
IFNAR2	1.23283e-17	0.117284	0.058	0.043	2.22957e-13
CDR2	1.23949e-17	0.102275	0.048	0.035	2.24162e-13
PEX26	1.26992e-17	0.103632	0.046	0.033	2.29665e-13
RNF180	1.29091e-17	0.15912	0.047	0.033	2.3346e-13
MED19	1.31496e-17	0.10299	0.063	0.047	2.3781e-13
PRR5L	1.3599e-17	-0.375274	0.015	0.008	2.45938e-13
BICD2	1.43613e-17	0.133829	0.05	0.036	2.59723e-13
HAUS2	1.48297e-17	0.122257	0.044	0.031	2.68195e-13
ABHD6	1.53965e-17	0.192806	0.037	0.025	2.78445e-13
SLC1A6	1.54936e-17	0.126478	0.042	0.029	2.80202e-13
PRDX6	1.55641e-17	0.147764	0.038	0.026	2.81477e-13
FGFR1OP2	1.56292e-17	0.103857	0.053	0.038	2.82654e-13
MANEA	1.61509e-17	0.216764	0.039	0.027	2.92089e-13
CPNE6	1.6691e-17	0.984833	0.013	0.006	3.01857e-13
FOXG1	1.67041e-17	-0.313918	0.264	0.276	3.02093e-13
MPDZ	1.72417e-17	0.30649	0.025	0.016	3.11816e-13
HSF2	1.80955e-17	0.10966	0.053	0.039	3.27258e-13
GAD2	1.81691e-17	0.131343	0.101	0.081	3.28589e-13
ADD3	1.88214e-17	0.155283	0.036	0.025	3.40384e-13
CLEC11A	1.88772e-17	0.105429	0.045	0.032	3.41394e-13
GSPT1	1.89674e-17	0.186519	0.035	0.024	3.43026e-13
HDAC9	1.92008e-17	0.141456	0.03	0.019	3.47246e-13
COQ4	2.14586e-17	-0.102166	0.133	0.107	3.88079e-13
MED15	2.16751e-17	0.163804	0.047	0.034	3.91994e-13
SORD	2.21823e-17	0.200129	0.025	0.015	4.01167e-13
VCPKMT	2.264e-17	0.132834	0.056	0.042	4.09444e-13
RAMP1	2.30416e-17	0.191116	0.012	0.006	4.16707e-13
PLCL1	2.31527e-17	0.425585	0.018	0.01	4.18716e-13
EFHD2	2.32398e-17	0.164471	0.026	0.017	4.20291e-13
WSCD1	2.36781e-17	0.18999	0.021	0.013	4.28218e-13
HEBP2	2.52015e-17	0.267718	0.023	0.014	4.55769e-13
RABEPK	2.5264e-17	0.165714	0.029	0.019	4.56899e-13
GGCT	2.52758e-17	0.144182	0.036	0.024	4.57112e-13
GM2A	2.66759e-17	0.127827	0.021	0.012	4.82434e-13
VEPH1	2.70799e-17	0.199258	0.015	0.008	4.8974e-13
GPRC5C	2.769e-17	-0.127228	0.041	0.028	5.00774e-13
MFSD13A	2.77474e-17	0.17296	0.031	0.02	5.01811e-13
PDGFRB	2.80886e-17	0.473275	0.011	0.005	5.07982e-13
DIAPH2	2.8913e-17	0.41499	0.016	0.008	5.22892e-13
SERINC5	2.92639e-17	0.217632	0.032	0.021	5.29238e-13
NRG3	3.00422e-17	0.269063	0.017	0.01	5.43312e-13
LZTR1	3.01083e-17	0.108741	0.041	0.029	5.44508e-13
RAB15	3.08207e-17	0.254792	0.042	0.03	5.57393e-13
FSIP2	3.12076e-17	0.179781	0.032	0.021	5.64389e-13
GBX1	3.13589e-17	-0.220741	0.01	0.004	5.67125e-13
TMLHE	3.15457e-17	0.194709	0.044	0.031	5.70503e-13
SPTBN2	3.21216e-17	0.226333	0.031	0.021	5.80919e-13
TMEM225B	3.24329e-17	0.758891	0.014	0.007	5.86549e-13
EZR	3.55104e-17	0.136412	0.038	0.027	6.42206e-13
MIIP	3.65613e-17	0.108817	0.058	0.043	6.61211e-13
REPS2	3.76367e-17	0.44797	0.014	0.007	6.8066e-13
TSNAX	3.82369e-17	0.147873	0.043	0.031	6.91515e-13
PHYH	4.13158e-17	0.120959	0.039	0.027	7.47196e-13
ZNF805	4.23555e-17	0.129237	0.06	0.045	7.65999e-13
CRYZ	4.63224e-17	-1.48535	0.009	0.016	8.3774e-13
NKD2	4.75153e-17	0.111953	0.03	0.02	8.59313e-13
C1orf109	4.79837e-17	0.145339	0.037	0.026	8.67785e-13
ATP6V1D	4.87255e-17	-0.108277	0.105	0.083	8.812e-13
F11R	4.90075e-17	0.462421	0.014	0.007	8.86301e-13
EIF2AK4	5.33639e-17	0.16741	0.039	0.027	9.65086e-13
HERC1	6.15047e-17	0.123138	0.055	0.041	1.11231e-12
PSENEN	6.16732e-17	-0.103843	0.087	0.068	1.11536e-12
ALDH1B1	6.26902e-17	0.18587	0.028	0.018	1.13375e-12
METTL17	6.47239e-17	0.199941	0.033	0.022	1.17053e-12
MIGA2	6.82068e-17	0.174026	0.042	0.029	1.23352e-12
FARP2	7.4422e-17	0.163817	0.03	0.02	1.34592e-12
NOMO1	7.90956e-17	0.250423	0.042	0.03	1.43044e-12
DLST	7.95288e-17	-0.105432	0.063	0.047	1.43828e-12
LONRF2	9.47022e-17	0.132729	0.053	0.039	1.71269e-12
RADIL	9.63579e-17	0.287184	0.028	0.018	1.74263e-12
SPARC	9.66029e-17	-0.134497	0.126	0.102	1.74706e-12
PAQR6	9.71368e-17	0.133553	0.03	0.02	1.75672e-12
INPP4A	9.90151e-17	0.210169	0.037	0.025	1.79069e-12
CYB5A	1.01715e-16	0.102113	0.036	0.025	1.83952e-12
IQSEC3	1.03881e-16	0.163185	0.034	0.023	1.8787e-12
ABL1	1.04214e-16	-0.101358	0.118	0.094	1.88471e-12
C11orf74	1.1158e-16	0.177379	0.034	0.023	2.01793e-12
PLXNC1	1.11655e-16	0.179592	0.046	0.033	2.01929e-12
COL18A1	1.1367e-16	0.175622	0.019	0.011	2.05572e-12
LACTB2	1.22174e-16	0.204264	0.03	0.02	2.20951e-12
KLHDC8B	1.2436e-16	0.101884	0.034	0.023	2.24905e-12
PXMP2	1.32055e-16	0.479461	0.021	0.013	2.38822e-12
CREBRF	1.36282e-16	0.108077	0.05	0.037	2.46465e-12
SDF2L1	1.4045e-16	0.130731	0.026	0.016	2.54004e-12
EPS8	1.41619e-16	0.241599	0.027	0.018	2.56119e-12
GGH	1.41911e-16	0.22819	0.042	0.03	2.56646e-12
LRSAM1	1.55491e-16	0.136685	0.044	0.031	2.81205e-12
TBP	1.62982e-16	0.116645	0.063	0.048	2.94752e-12
RAP1GAP2	1.70239e-16	0.318185	0.027	0.018	3.07878e-12
TDP1	1.71067e-16	0.13015	0.063	0.048	3.09374e-12
EIF3L	1.73064e-16	0.578661	0.02	0.012	3.12986e-12
LMF1	1.73613e-16	0.160494	0.034	0.023	3.1398e-12
COL26A1	1.89743e-16	0.150704	0.037	0.025	3.4315e-12
SLC35G2	1.93236e-16	0.154069	0.045	0.033	3.49467e-12
C9orf40	1.94152e-16	0.324921	0.025	0.016	3.51125e-12
SNAPC2	1.95354e-16	0.113017	0.046	0.033	3.53298e-12
FOXJ1	2.00196e-16	0.126174	0.01	0.004	3.62054e-12
MAN2B1	2.00482e-16	0.215784	0.022	0.014	3.62572e-12
PEPD	2.01291e-16	0.120935	0.022	0.014	3.64034e-12
HIST1H2BG	2.04874e-16	0.70149	0.019	0.011	3.70515e-12
FAM50A	2.07579e-16	0.152846	0.047	0.034	3.75407e-12
RCAN2	2.10376e-16	0.237042	0.028	0.018	3.80465e-12
DPH2	2.15108e-16	0.110575	0.044	0.032	3.89023e-12
SPNS1	2.32552e-16	-0.123247	0.124	0.099	4.20571e-12
CRB2	2.32928e-16	-0.312099	0.046	0.033	4.21251e-12
HMGCS1	2.36651e-16	0.283418	0.029	0.019	4.27983e-12
ANKRA2	2.45676e-16	0.132209	0.05	0.037	4.44306e-12
C15orf61	2.53266e-16	0.156971	0.051	0.038	4.58031e-12
HSBP1	2.53387e-16	0.117966	0.041	0.029	4.58251e-12
HIF1A	2.57674e-16	0.17927	0.047	0.034	4.66003e-12
GAL3ST1	2.64375e-16	0.316129	0.026	0.017	4.78122e-12
HDAC5	2.67279e-16	0.113137	0.058	0.044	4.83373e-12
NUDCD3	2.71122e-16	0.165977	0.039	0.028	4.90324e-12
HIRA	2.73543e-16	0.257563	0.029	0.019	4.94703e-12
EPHB2	2.78924e-16	-0.119291	0.091	0.071	5.04434e-12
TRPV1	2.8223e-16	0.24651	0.028	0.018	5.10413e-12
TBCE	3.17105e-16	0.1431	0.05	0.037	5.73484e-12
CDH22	3.28665e-16	0.25795	0.028	0.018	5.9439e-12
TMEM222	3.32266e-16	0.145742	0.029	0.019	6.00903e-12
MAP7	3.35721e-16	0.37473	0.02	0.012	6.07151e-12
ARL6IP1	3.61008e-16	0.401008	0.024	0.015	6.52882e-12
HERC3	3.77431e-16	0.174243	0.048	0.035	6.82583e-12
RALGPS1	3.90128e-16	0.106604	0.048	0.035	7.05547e-12
KEAP1	4.04258e-16	0.1712	0.033	0.023	7.31101e-12
IGF2BP1	4.06766e-16	0.318428	0.025	0.016	7.35637e-12
PLEKHA1	4.11451e-16	0.116285	0.067	0.052	7.44109e-12
GABBR2	4.15146e-16	0.209768	0.049	0.036	7.50792e-12
RALB	4.20452e-16	0.167453	0.032	0.022	7.60388e-12
DGKE	4.35497e-16	0.223309	0.034	0.023	7.87596e-12
KDSR	4.79605e-16	0.109253	0.031	0.021	8.67365e-12
DUSP15	5.02953e-16	0.176262	0.037	0.026	9.0959e-12
PITPNM2	5.18262e-16	0.237058	0.027	0.018	9.37276e-12
TRPM7	5.25354e-16	0.262326	0.03	0.02	9.50102e-12
SMAD9	5.36679e-16	0.127086	0.041	0.029	9.70584e-12
RFC5	5.46816e-16	0.160393	0.025	0.016	9.88917e-12
TMEM182	5.70432e-16	0.161748	0.031	0.021	1.03163e-11
SEL1L3	5.93107e-16	0.407045	0.02	0.012	1.07263e-11
ZBTB46	5.95028e-16	0.256496	0.023	0.014	1.07611e-11
THAP11	6.00666e-16	0.109122	0.04	0.029	1.0863e-11
SELENOF	6.23125e-16	-0.110321	0.154	0.126	1.12692e-11
ANKDD1A	6.4624e-16	0.372226	0.023	0.015	1.16873e-11
MARCH2	6.66759e-16	0.121399	0.032	0.021	1.20583e-11
CAMK1	6.95672e-16	0.261982	0.021	0.013	1.25812e-11
SLC13A3	6.98161e-16	0.874693	0.011	0.005	1.26262e-11
GRHL1	7.07045e-16	0.142943	0.02	0.012	1.27869e-11
TDRP	7.07694e-16	0.159628	0.044	0.031	1.27986e-11
LRRTM2	7.12645e-16	0.334608	0.022	0.014	1.28882e-11
KAT2A	7.28515e-16	0.297111	0.025	0.016	1.31752e-11
CITED4	7.30709e-16	0.131865	0.028	0.019	1.32149e-11
GALNT1	7.41203e-16	-0.109733	0.117	0.094	1.34047e-11
CLK4	7.68507e-16	0.100886	0.067	0.051	1.38984e-11
COL27A1	7.73872e-16	0.104993	0.016	0.009	1.39955e-11
PSEN2	7.7945e-16	0.208079	0.018	0.011	1.40963e-11
LMNA	8.23004e-16	-0.100287	0.08	0.062	1.4884e-11
TARS	8.41866e-16	0.269589	0.03	0.02	1.52252e-11
PLXND1	8.45472e-16	0.291227	0.01	0.004	1.52904e-11
SYT17	8.97028e-16	0.331639	0.01	0.005	1.62227e-11
TRAM1L1	9.29931e-16	0.14112	0.033	0.022	1.68178e-11
BET1L	9.37256e-16	-0.119422	0.126	0.102	1.69503e-11
SPTAN1	1.024e-15	0.730514	0.013	0.007	1.8519e-11
MAPKAPK3	1.05368e-15	0.139504	0.026	0.017	1.90558e-11
ATP6V0B	1.05985e-15	0.176214	0.048	0.035	1.91673e-11
TCIM	1.0614e-15	0.408837	0.02	0.012	1.91953e-11
ATP1A2	1.09913e-15	-0.873246	0.024	0.034	1.98777e-11
TIGAR	1.11672e-15	0.132173	0.038	0.027	2.01959e-11
TBC1D30	1.23049e-15	0.248881	0.036	0.025	2.22534e-11
TUBB4B	1.24465e-15	0.187661	0.059	0.045	2.25094e-11
KAT7	1.24776e-15	0.16494	0.049	0.036	2.25657e-11
PRKG1	1.26685e-15	0.258916	0.021	0.013	2.2911e-11
CCDC127	1.26854e-15	0.134311	0.039	0.028	2.29415e-11
SYT9	1.33258e-15	0.175953	0.026	0.017	2.40998e-11
STX12	1.36711e-15	-0.109924	0.143	0.116	2.47241e-11
ADO	1.49915e-15	0.126284	0.046	0.034	2.71121e-11
PFKFB4	1.51357e-15	-0.922973	0.043	0.055	2.7373e-11
DDX10	1.56124e-15	0.165602	0.026	0.017	2.82351e-11
POLR1A	1.59913e-15	0.185394	0.039	0.027	2.89203e-11
EIF5	1.85736e-15	-0.10685	0.158	0.13	3.35904e-11
COCH	1.87587e-15	0.128512	0.025	0.016	3.3925e-11
C12orf65	1.97667e-15	0.160471	0.037	0.026	3.5748e-11
TUFT1	2.10027e-15	0.111306	0.04	0.029	3.79834e-11
SYNJ2BP	2.10501e-15	0.154368	0.043	0.031	3.80691e-11
DARS	2.17521e-15	-0.109534	0.141	0.115	3.93386e-11
NIPSNAP3A	2.19447e-15	0.226638	0.022	0.014	3.9687e-11
SEPHS1	2.27504e-15	-0.163804	0.086	0.068	4.11441e-11
LONRF1	2.29901e-15	0.152902	0.041	0.03	4.15775e-11
BCCIP	2.41858e-15	-0.140418	0.105	0.084	4.37401e-11
JOSD1	2.48143e-15	0.12491	0.039	0.027	4.48767e-11
OPCML	2.49898e-15	0.316255	0.018	0.01	4.51941e-11
GFOD1	2.64286e-15	0.186749	0.027	0.018	4.77962e-11
C1orf131	2.80809e-15	0.158324	0.034	0.024	5.07843e-11
LDLRAD3	2.85024e-15	0.12904	0.023	0.015	5.15465e-11
GABRA4	2.93342e-15	0.811386	0.01	0.004	5.3051e-11
CD151	2.94524e-15	-0.157787	0.071	0.055	5.32647e-11
ALCAM	3.00254e-15	0.286434	0.025	0.016	5.43009e-11
SEC13	3.03953e-15	-0.131395	0.164	0.135	5.49698e-11
WDR17	3.06027e-15	0.173234	0.047	0.035	5.53451e-11
LPL	3.27325e-15	0.280676	0.021	0.013	5.91967e-11
KCTD15	3.4901e-15	0.129255	0.03	0.02	6.31185e-11
PPIL1	3.7502e-15	-0.126682	0.095	0.076	6.78225e-11
ARFGEF3	3.81685e-15	0.13859	0.036	0.025	6.90278e-11
CCDC85C	3.91899e-15	-0.109445	0.07	0.054	7.08749e-11
CIB2	4.01529e-15	0.133573	0.041	0.03	7.26165e-11
VAMP7	4.01883e-15	0.117573	0.027	0.018	7.26805e-11
PALD1	4.14415e-15	0.571895	0.011	0.006	7.4947e-11
TMEM229B	4.20086e-15	0.249306	0.024	0.015	7.59726e-11
SS18L1	4.26361e-15	0.116551	0.072	0.056	7.71073e-11
DBP	4.35233e-15	0.119604	0.048	0.035	7.87119e-11
CA14	4.51051e-15	0.190353	0.01	0.005	8.15726e-11
SLFN5	4.55915e-15	0.247046	0.014	0.008	8.24522e-11
RSRC2	4.57855e-15	0.120097	0.059	0.045	8.28031e-11
SCN9A	4.67004e-15	0.361816	0.014	0.008	8.44576e-11
CABIN1	4.6835e-15	-0.687872	0.102	0.115	8.4701e-11
IFT52	4.6992e-15	0.54514	0.016	0.009	8.4985e-11
HSPA4L	4.77375e-15	0.527594	0.017	0.01	8.63332e-11
PDP2	4.78875e-15	0.182963	0.03	0.02	8.66046e-11
TENM4	4.81488e-15	0.187341	0.023	0.015	8.70771e-11
PALM2-AKAP2	4.86764e-15	0.262029	0.021	0.013	8.80313e-11
KIAA0513	5.03842e-15	0.127859	0.039	0.028	9.11198e-11
C3orf38	5.1415e-15	-0.107016	0.092	0.074	9.2984e-11
MOB3B	5.16076e-15	0.37229	0.027	0.018	9.33324e-11
TCTN1	5.29241e-15	-0.120593	0.053	0.04	9.57132e-11
MOCS2	5.35578e-15	-0.10215	0.105	0.084	9.68593e-11
DTNBP1	5.42412e-15	0.197482	0.029	0.019	9.80953e-11
KDM3B	5.5186e-15	0.168655	0.027	0.018	9.98039e-11
HNRNPH2	5.76578e-15	0.622328	0.015	0.009	1.04274e-10
C16orf46	6.01646e-15	0.164682	0.036	0.025	1.08808e-10
RGS7	6.16217e-15	0.344179	0.026	0.017	1.11443e-10
ZDHHC14	7.03568e-15	0.491704	0.017	0.01	1.2724e-10
SLC25A17	7.18989e-15	0.159089	0.039	0.028	1.30029e-10
LARGE1	7.22844e-15	-0.593746	0.006	0.011	1.30726e-10
ISG20	7.3874e-15	0.781382	0.012	0.006	1.33601e-10
OFD1	7.51133e-15	0.23106	0.037	0.026	1.35842e-10
FBXW7	7.52652e-15	0.115554	0.048	0.036	1.36117e-10
ATP5IF1	7.79505e-15	-0.115109	0.114	0.092	1.40973e-10
GIPC1	7.86406e-15	0.124324	0.041	0.03	1.42222e-10
WWOX	8.18083e-15	0.120577	0.039	0.028	1.4795e-10
CREB3L4	8.20741e-15	0.180507	0.018	0.011	1.48431e-10
ADAM20	8.39188e-15	0.278614	0.03	0.021	1.51767e-10
PSTPIP2	8.56388e-15	0.582541	0.011	0.006	1.54878e-10
HSF1	8.81512e-15	0.155772	0.035	0.025	1.59421e-10
ASCL1	9.37902e-15	0.218841	0.033	0.023	1.6962e-10
KIF1A	9.8431e-15	0.913393	0.013	0.007	1.78012e-10
VDAC1	1.02683e-14	-0.133472	0.137	0.112	1.85702e-10
BID	1.04985e-14	0.389639	0.022	0.014	1.89866e-10
RCAN1	1.08113e-14	0.289325	0.024	0.016	1.95522e-10
MTRR	1.15884e-14	0.116908	0.033	0.023	2.09576e-10
TP53I13	1.18746e-14	0.21952	0.018	0.011	2.14752e-10
GLB1L2	1.19743e-14	0.441158	0.01	0.005	2.16555e-10
CPNE7	1.21809e-14	0.590195	0.01	0.005	2.20292e-10
KLHDC3	1.21891e-14	0.361671	0.021	0.013	2.2044e-10
SUGT1	1.24817e-14	-0.101221	0.176	0.146	2.25731e-10
PTPRM	1.25899e-14	0.236598	0.043	0.032	2.27689e-10
FCF1	1.27161e-14	-0.111863	0.048	0.036	2.2997e-10
NLGN1	1.29553e-14	0.147354	0.024	0.016	2.34297e-10
EIF1AX	1.29897e-14	0.290192	0.023	0.015	2.34918e-10
WDR18	1.29944e-14	-0.116544	0.092	0.073	2.35003e-10
EMP3	1.30516e-14	0.208062	0.019	0.012	2.36038e-10
CHFR	1.30523e-14	0.111612	0.042	0.031	2.36051e-10
ANKRD9	1.31818e-14	0.16224	0.024	0.015	2.38394e-10
GNG12	1.34174e-14	0.438234	0.013	0.007	2.42654e-10
ZBED1	1.36771e-14	0.156452	0.042	0.031	2.4735e-10
KIF5B	1.49992e-14	-0.121638	0.195	0.162	2.71261e-10
MID1	1.5423e-14	0.388171	0.024	0.016	2.78925e-10
AVPI1	1.54992e-14	0.138398	0.025	0.016	2.80304e-10
USP31	1.60435e-14	0.232045	0.03	0.021	2.90147e-10
CHSY1	1.67543e-14	-0.149676	0.073	0.057	3.03002e-10
HMCES	1.71073e-14	0.307272	0.021	0.013	3.09385e-10
IL17RD	1.79453e-14	0.101801	0.033	0.023	3.24541e-10
TANGO2	1.84781e-14	0.163335	0.021	0.013	3.34176e-10
ACTR6	1.85415e-14	0.118423	0.04	0.029	3.35323e-10
SNX4	1.85447e-14	0.122811	0.045	0.033	3.35381e-10
RCC2	1.8546e-14	0.13895	0.038	0.028	3.35405e-10
C1orf61	1.89449e-14	0.321385	0.045	0.033	3.42619e-10
SNTG1	2.011e-14	0.300345	0.027	0.018	3.6369e-10
RCL1	2.07618e-14	0.134938	0.034	0.024	3.75478e-10
CHST1	2.11003e-14	0.173048	0.029	0.02	3.81599e-10
IDH3B	2.18395e-14	0.143118	0.04	0.029	3.94967e-10
CD276	2.23375e-14	-0.109138	0.122	0.099	4.03975e-10
CEP85	2.3178e-14	0.162099	0.039	0.028	4.19174e-10
SGPP1	2.3324e-14	0.120213	0.037	0.027	4.21814e-10
PCYT2	2.36113e-14	0.239354	0.027	0.018	4.27011e-10
PHF8	2.37413e-14	0.215608	0.034	0.024	4.29361e-10
PPP2R5C	2.39305e-14	-0.102871	0.09	0.072	4.32784e-10
MPP1	2.5106e-14	0.377514	0.025	0.016	4.54042e-10
LBH	2.52936e-14	-0.103251	0.102	0.082	4.57435e-10
AK1	2.59512e-14	0.215734	0.026	0.018	4.69328e-10
SEMA7A	2.60458e-14	0.159222	0.024	0.016	4.71039e-10
NCOA4	2.649e-14	0.123425	0.038	0.027	4.79071e-10
ANAPC13	2.71558e-14	-0.130718	0.114	0.092	4.91112e-10
AJM1	2.7835e-14	0.181807	0.035	0.025	5.03395e-10
ZNF66	2.79167e-14	0.472915	0.013	0.007	5.04873e-10
VPS52	2.83742e-14	0.107811	0.041	0.03	5.13147e-10
FBXW4	2.90505e-14	0.543574	0.01	0.005	5.25378e-10
TTC33	2.94899e-14	0.130237	0.029	0.02	5.33325e-10
CACNB4	2.97034e-14	0.306255	0.032	0.023	5.37186e-10
RRS1	3.03583e-14	0.219421	0.022	0.014	5.4903e-10
PPFIBP1	3.2504e-14	0.147883	0.049	0.037	5.87835e-10
DBNL	3.51295e-14	-0.110796	0.123	0.101	6.35317e-10
ABLIM2	3.54116e-14	0.266032	0.022	0.014	6.40418e-10
SLC12A6	3.7651e-14	0.140262	0.036	0.026	6.80919e-10
PLEKHA3	3.77381e-14	0.179347	0.027	0.018	6.82493e-10
DNAJB6	3.77878e-14	0.253425	0.022	0.014	6.83393e-10
TSPAN11	3.92572e-14	0.142434	0.027	0.018	7.09966e-10
C12orf45	3.94002e-14	0.107784	0.038	0.027	7.12552e-10
ALS2	3.95641e-14	-0.100328	0.072	0.056	7.15517e-10
HAGHL	4.01418e-14	0.110269	0.032	0.022	7.25965e-10
PEX14	4.29014e-14	0.217103	0.027	0.019	7.75872e-10
NDN	4.40164e-14	-0.201735	0.13	0.106	7.96036e-10
PCDHGB7	4.48318e-14	-0.128592	0.148	0.122	8.10783e-10
RCCD1	4.51286e-14	0.201569	0.021	0.014	8.16151e-10
TDRD3	4.60747e-14	0.165063	0.042	0.031	8.33261e-10
PPT1	4.68805e-14	-0.141911	0.082	0.065	8.47834e-10
ELOVL1	4.87621e-14	0.120081	0.031	0.022	8.81863e-10
RFX1	4.88427e-14	0.10585	0.033	0.023	8.83321e-10
INSR	5.14568e-14	0.128028	0.038	0.028	9.30597e-10
RWDD2B	5.2318e-14	0.107673	0.01	0.005	9.46171e-10
NCOA7	5.39578e-14	0.197371	0.023	0.015	9.75826e-10
TBC1D20	5.61198e-14	-0.108833	0.067	0.052	1.01493e-09
EP400	5.9291e-14	0.219998	0.036	0.026	1.07228e-09
EPHB1	6.18937e-14	-0.209399	0.049	0.036	1.11935e-09
FBRS	6.2517e-14	0.211691	0.028	0.019	1.13062e-09
DCAF4	6.38154e-14	0.150379	0.033	0.023	1.1541e-09
KCNB1	6.43239e-14	0.350956	0.018	0.011	1.1633e-09
SNRNP40	6.55391e-14	-0.106729	0.121	0.099	1.18527e-09
PAQR4	6.60099e-14	0.101	0.032	0.023	1.19379e-09
TTC13	7.03704e-14	0.108898	0.048	0.036	1.27265e-09
H2AFX	7.11449e-14	0.190164	0.044	0.033	1.28665e-09
TAF13	7.13907e-14	-0.103529	0.115	0.094	1.2911e-09
SH2D5	7.14933e-14	0.391387	0.015	0.009	1.29296e-09
DSG2	7.29953e-14	0.408985	0.013	0.007	1.32012e-09
GPRASP2	7.2998e-14	-0.13963	0.079	0.062	1.32017e-09
ANKMY2	7.3343e-14	0.15151	0.035	0.025	1.32641e-09
ARSD	7.39722e-14	0.286327	0.011	0.006	1.33779e-09
FUCA2	7.39981e-14	0.116215	0.019	0.012	1.33826e-09
ZNF618	7.57663e-14	-0.114216	0.077	0.061	1.37023e-09
URGCP	7.692e-14	0.39784	0.018	0.011	1.3911e-09
PTPRE	7.83014e-14	0.124731	0.011	0.005	1.41608e-09
GABPB1	7.84803e-14	0.116184	0.039	0.029	1.41932e-09
DUSP11	7.86247e-14	-0.101611	0.096	0.077	1.42193e-09
PPM1H	8.04825e-14	0.238985	0.017	0.01	1.45553e-09
HMOX2	8.15789e-14	0.2178	0.039	0.028	1.47535e-09
SCAI	8.46789e-14	0.245459	0.03	0.021	1.53142e-09
NCK1	8.61108e-14	0.146474	0.049	0.037	1.55731e-09
TRAM1	8.74655e-14	-0.117339	0.117	0.096	1.58181e-09
TNKS2	8.75886e-14	-0.138075	0.172	0.143	1.58404e-09
SLC6A17	8.8676e-14	0.372734	0.019	0.012	1.60371e-09
TXNRD3	8.90346e-14	0.121633	0.026	0.018	1.61019e-09
ONECUT1	9.48735e-14	0.21776	0.013	0.007	1.71579e-09
AREL1	9.92034e-14	-0.105757	0.074	0.058	1.79409e-09
ARNTL2	9.95354e-14	0.259427	0.023	0.015	1.8001e-09
YME1L1	1.12202e-13	-0.100282	0.085	0.068	2.02917e-09
SNRK	1.14366e-13	0.214391	0.026	0.018	2.06831e-09
TMEM187	1.18509e-13	0.33932	0.015	0.009	2.14323e-09
HCN2	1.20459e-13	0.304862	0.025	0.017	2.17851e-09
FAM184A	1.23481e-13	0.13981	0.048	0.036	2.23315e-09
C11orf49	1.23521e-13	-0.102928	0.114	0.093	2.23389e-09
PCBP2	1.32004e-13	-0.113581	0.122	0.1	2.38729e-09
HUS1	1.32701e-13	0.135996	0.062	0.048	2.3999e-09
ZNF503	1.36585e-13	-1.10742	0.014	0.021	2.47015e-09
INTS10	1.37319e-13	0.223731	0.024	0.016	2.48341e-09
FOCAD	1.38612e-13	0.157293	0.029	0.02	2.50679e-09
KCNC4	1.40299e-13	0.383959	0.012	0.007	2.53731e-09
C12orf10	1.4182e-13	-0.10296	0.079	0.063	2.56482e-09
HPCAL1	1.42473e-13	0.167176	0.022	0.014	2.57662e-09
HIF3A	1.4623e-13	0.112901	0.042	0.031	2.64457e-09
TMEM130	1.5057e-13	0.109615	0.029	0.02	2.72306e-09
GLS2	1.56731e-13	0.230009	0.022	0.014	2.83449e-09
CRIPT	1.58054e-13	-0.166077	0.179	0.148	2.85841e-09
TOR3A	1.65109e-13	0.344725	0.02	0.013	2.986e-09
ATG2A	1.71632e-13	0.11133	0.026	0.018	3.10397e-09
ZNF473	1.76065e-13	0.150794	0.027	0.018	3.18414e-09
NKIRAS1	1.9085e-13	0.129924	0.042	0.031	3.45153e-09
C12orf49	1.91025e-13	0.176287	0.029	0.02	3.45469e-09
SNPH	2.01887e-13	0.128659	0.039	0.029	3.65113e-09
RIDA	2.03019e-13	0.198322	0.023	0.015	3.6716e-09
RFTN2	2.08488e-13	0.224306	0.016	0.01	3.77051e-09
RAP1A	2.08506e-13	-0.109251	0.079	0.063	3.77083e-09
GABRA3	2.12444e-13	0.149881	0.026	0.018	3.84205e-09
RIPK2	2.14527e-13	0.123822	0.022	0.014	3.87972e-09
ZBTB49	2.20252e-13	0.145517	0.034	0.024	3.98325e-09
DPH6	2.20491e-13	-0.120597	0.057	0.044	3.98759e-09
ZNF326	2.435e-13	-0.103614	0.121	0.1	4.4037e-09
ETAA1	2.44182e-13	0.171843	0.039	0.029	4.41602e-09
DENND1B	2.61882e-13	0.157635	0.023	0.015	4.73614e-09
CRIM1	2.69138e-13	0.130563	0.031	0.022	4.86737e-09
SLC41A3	2.71897e-13	0.199939	0.026	0.017	4.91725e-09
PUS7L	2.71989e-13	0.152525	0.045	0.034	4.91892e-09
CCDC163	2.73905e-13	0.164082	0.025	0.017	4.95358e-09
CDYL2	2.83e-13	0.285056	0.02	0.013	5.11806e-09
SNX9	2.90068e-13	0.188458	0.022	0.015	5.24588e-09
ST8SIA1	2.95337e-13	-0.168735	0.072	0.057	5.34117e-09
ZMYM1	2.98288e-13	0.101394	0.049	0.037	5.39453e-09
HSPH1	3.07451e-13	0.313172	0.021	0.014	5.56025e-09
SYNGR2	3.20026e-13	0.207456	0.022	0.014	5.78768e-09
EPHX2	3.41434e-13	0.149054	0.022	0.014	6.17483e-09
CIRBP	3.45007e-13	-0.185077	0.539	0.525	6.23945e-09
KCNIP1	3.46995e-13	0.161835	0.024	0.016	6.27541e-09
HDAC10	3.47299e-13	0.248753	0.026	0.018	6.2809e-09
ZNF880	3.50205e-13	0.159756	0.036	0.026	6.33345e-09
ARL8B	3.53163e-13	-0.125375	0.057	0.044	6.38695e-09
UHRF1BP1	3.58216e-13	0.13715	0.027	0.019	6.47834e-09
STAM	3.61891e-13	0.109543	0.039	0.029	6.5448e-09
CHST2	3.66312e-13	0.586378	0.014	0.008	6.62476e-09
ZNF571	3.74151e-13	0.344098	0.022	0.014	6.76651e-09
PIGA	3.74447e-13	0.288064	0.025	0.017	6.77187e-09
HECTD4	3.95302e-13	0.268653	0.026	0.018	7.14903e-09
TPD52L1	4.09904e-13	0.633892	0.014	0.008	7.41312e-09
GSE1	4.24975e-13	-0.131935	0.123	0.101	7.68568e-09
PLK3	4.26051e-13	0.27997	0.022	0.014	7.70512e-09
MOV10	4.30043e-13	0.284627	0.021	0.014	7.77734e-09
NDUFAF4	4.45868e-13	0.106906	0.04	0.03	8.06352e-09
HFM1	4.49496e-13	0.133749	0.026	0.018	8.12913e-09
TMEM128	4.57391e-13	0.158024	0.034	0.024	8.27191e-09
SH3BP4	4.59697e-13	-0.300145	0.042	0.031	8.31363e-09
TAP2	4.64199e-13	0.414282	0.017	0.01	8.39503e-09
TMEM203	4.64205e-13	0.131803	0.035	0.026	8.39515e-09
PLXDC1	4.68319e-13	0.480611	0.012	0.007	8.46955e-09
RGS7BP	4.77139e-13	0.123934	0.037	0.027	8.62906e-09
FOXN3	4.82458e-13	0.119516	0.049	0.037	8.72525e-09
TMEM263	4.82496e-13	-0.102332	0.162	0.135	8.72594e-09
SAP25	4.94966e-13	0.176191	0.028	0.019	8.95147e-09
LSM12	5.00099e-13	0.124558	0.036	0.026	9.04429e-09
MTLN	5.24206e-13	-0.528639	0.043	0.053	9.48026e-09
EWSR1	5.24312e-13	-0.105108	0.122	0.101	9.48219e-09
KLHL2	5.24947e-13	0.294037	0.023	0.015	9.49366e-09
SCRT2	5.55814e-13	0.103754	0.075	0.06	1.00519e-08
FUS	5.64845e-13	-0.142946	0.161	0.134	1.02152e-08
IDI1	5.8654e-13	0.276054	0.037	0.027	1.06076e-08
BAALC	6.20145e-13	0.467474	0.012	0.007	1.12153e-08
CDK11B	6.51025e-13	0.140374	0.028	0.019	1.17738e-08
NXT2	6.56359e-13	0.127767	0.018	0.011	1.18702e-08
C14orf119	6.82799e-13	-0.156873	0.064	0.05	1.23484e-08
EDA2R	7.04769e-13	0.206059	0.03	0.021	1.27457e-08
SCARA3	7.06428e-13	0.350968	0.01	0.005	1.27757e-08
FER	7.38469e-13	0.267987	0.025	0.017	1.33552e-08
DUSP12	7.80016e-13	-0.119344	0.076	0.061	1.41066e-08
ISCA1	7.9239e-13	0.108235	0.033	0.023	1.43304e-08
YARS2	7.94999e-13	0.109876	0.034	0.024	1.43776e-08
CPXM1	8.02701e-13	-0.131508	0.052	0.04	1.45168e-08
PLCD3	8.07411e-13	0.27115	0.018	0.011	1.4602e-08
HCN4	8.09234e-13	0.221974	0.019	0.012	1.4635e-08
ARHGAP44	8.17224e-13	0.134967	0.04	0.029	1.47795e-08
SNRPB	8.23524e-13	-0.111169	0.143	0.119	1.48934e-08
WBP1	8.25181e-13	-0.119879	0.191	0.161	1.49234e-08
ABLIM1	8.32074e-13	0.201768	0.014	0.008	1.50481e-08
SLC4A10	8.84866e-13	0.12608	0.036	0.026	1.60028e-08
PSEN1	9.284e-13	-0.101332	0.106	0.087	1.67901e-08
ZNF292	9.29686e-13	-0.413882	0.251	0.253	1.68134e-08
[truncated: 3,077 more rows]

## Sheet: InhibN-MGE
Gene	p_val	avg_log2FC	pct.1	pct.2	p_val_adj
USP11	0	0.502948	0.596	0.376	0
CDK16	0	0.481438	0.47	0.26	0
ALG13	0	1.07161	0.34	0.143	0
IGFBP2	0	0.794687	0.644	0.45	0
PEG3	0	2.72925	0.233	0.043	0
PSMD10	0	0.755355	0.362	0.174	0
AP1S2	0	0.928895	0.304	0.127	0
ENO2	0	0.361402	0.721	0.548	0
BNIP3L	0	0.33155	0.564	0.394	0
DCX	0	0.31468	0.856	0.69	0
INPP5F	0	1.97268	0.27	0.105	0
MIF	0	0.404998	0.472	0.308	0
MEST	0	0.360256	0.861	0.704	0
SCD	0	0.454294	0.423	0.276	0
CRABP2	0	0.538767	0.27	0.132	0
HM13	0	0.676751	0.318	0.18	0
SYAP1	0	0.928371	0.24	0.106	0
MAP1LC3B	0	0.5958	0.347	0.213	0
SST	0	-1.58896	0.186	0.314	0
DDX3Y	0	-13.4827	0	0.117	0
LRCH2	0	0.566675	0.241	0.125	0
RBBP7	0	0.950605	0.19	0.076	0
CHCHD2	0	-2.19161	0.046	0.158	0
CHL1	0	0.660601	0.186	0.081	0
HK2	0	1.18398	0.166	0.071	0
EIF1AY	0	-11.166	0	0.08	0
PTPRT	0	-1.84284	0.059	0.134	0
USP9Y	0	-15.2575	0	0.067	0
KDM5D	0	-11.243	0	0.064	0
UTY	0	-11.0887	0	0.063	0
NNAT	0	0.384993	0.933	0.898	0
CTPS2	6.24074e-303	0.723308	0.172	0.075	1.12864e-298
AMOT	2.59846e-298	1.18608	0.127	0.046	4.69932e-294
FAM162A	7.06623e-294	0.7827	0.238	0.128	1.27793e-289
EEF2	5.04401e-293	0.242254	0.65	0.477	9.12209e-289
PAK3	1.15762e-290	0.59567	0.183	0.085	2.09355e-286
NAP1L3	1.78056e-289	0.301325	0.314	0.181	3.22014e-285
ARF4	2.29378e-286	0.428518	0.4	0.26	4.1483e-282
USP9X	2.2952e-283	0.457773	0.295	0.173	4.15087e-279
MXRA7	2.59028e-283	0.317242	0.358	0.219	4.68452e-279
BCL2L1	2.33057e-280	0.532673	0.256	0.142	4.21484e-276
PRKACA	1.11989e-277	0.327438	0.411	0.265	2.02532e-273
DKK3	3.07644e-270	0.369765	0.291	0.168	5.56374e-266
CASK	1.33242e-261	0.290292	0.391	0.252	2.40969e-257
PKM	4.88936e-258	0.372582	0.356	0.225	8.84241e-254
G3BP2	6.13444e-253	0.270322	0.414	0.272	1.10941e-248
FTH1	6.09499e-250	0.251785	0.755	0.584	1.10228e-245
ZFY	9.21162e-250	-13.2536	0	0.018	1.66592e-245
NFE2L1	6.34365e-248	0.355528	0.328	0.205	1.14725e-243
BEX5	5.31218e-247	0.507845	0.223	0.121	9.60709e-243
GET1	2.64805e-245	0.274082	0.354	0.223	4.789e-241
COL6A1	1.79967e-244	0.344171	0.273	0.16	3.2547e-240
TPGS2	2.81038e-244	0.26786	0.353	0.222	5.08258e-240
UVSSA	7.22269e-238	0.491327	0.241	0.138	1.30622e-233
GAP43	2.78669e-235	0.21016	0.405	0.265	5.03973e-231
ERO1A	4.2623e-234	0.446486	0.28	0.17	7.70837e-230
TCEAL1	5.58373e-230	0.704708	0.128	0.054	1.00982e-225
PTTG1IP	2.61343e-225	0.373733	0.303	0.189	4.7264e-221
SCARB2	6.6853e-224	0.258388	0.325	0.204	1.20904e-219
NDUFA4	9.37788e-224	0.232263	0.52	0.369	1.69599e-219
GRINA	1.70918e-218	0.27534	0.353	0.229	3.09105e-214
DGUOK	4.09892e-215	0.272274	0.349	0.227	7.4129e-211
GABBR1	7.19923e-214	0.169656	0.384	0.251	1.30198e-209
ANAPC11	9.39607e-213	0.277247	0.412	0.281	1.69928e-208
TCEAL3	2.00925e-212	0.676117	0.137	0.063	3.63373e-208
RIOK3	3.80977e-212	0.407647	0.211	0.118	6.88997e-208
RNF11	1.29655e-208	0.26282	0.334	0.216	2.34482e-204
TRAPPC4	1.92662e-206	0.291021	0.319	0.205	3.48429e-202
SLC16A3	1.38652e-205	0.806667	0.15	0.076	2.50753e-201
TXLNG	1.9512e-203	0.735409	0.121	0.053	3.52875e-199
DLK1	1.13076e-202	0.368611	0.267	0.166	2.04498e-198
PTPRN	1.02621e-201	0.384052	0.269	0.168	1.8559e-197
ATP1A3	2.63342e-201	0.211557	0.469	0.331	4.76255e-197
KDM3A	2.87519e-201	0.339964	0.326	0.215	5.19978e-197
GOLGA7	8.54717e-201	0.355629	0.227	0.132	1.54576e-196
NAP1L5	1.71008e-195	0.378067	0.236	0.142	3.09268e-191
OBSL1	9.08879e-195	0.355082	0.287	0.183	1.64371e-190
P4HA1	1.09884e-193	0.534828	0.212	0.125	1.98725e-189
HMGB2	2.66263e-193	0.540074	0.163	0.086	4.81536e-189
SPOCK2	1.29536e-192	0.328431	0.242	0.146	2.34266e-188
MAPK1IP1L	3.14707e-192	0.224942	0.262	0.16	5.69148e-188
RNF5	8.56945e-190	0.215152	0.352	0.234	1.54979e-185
ZNF292	1.58638e-189	0.221763	0.371	0.249	2.86897e-185
MAGED2	1.61443e-189	0.177582	0.648	0.491	2.9197e-185
CEBPZOS	1.96102e-189	0.554084	0.151	0.077	3.5465e-185
YKT6	1.21892e-188	0.252333	0.442	0.313	2.20441e-184
NT5DC2	3.92687e-187	0.280844	0.287	0.184	7.10174e-183
SLC2A1	5.18201e-187	0.522689	0.207	0.122	9.37166e-183
LENG8	1.08341e-186	0.127325	0.498	0.357	1.95935e-182
EEF1A2	2.26234e-186	0.158049	0.516	0.371	4.09145e-182
ALKBH5	1.08487e-185	0.356286	0.305	0.202	1.96198e-181
ROMO1	1.2614e-185	0.277542	0.353	0.239	2.28124e-181
KIF1A	5.01106e-185	-0.684227	0.18	0.26	9.0625e-181
ZMIZ1	3.14811e-184	0.169414	0.392	0.268	5.69336e-180
EGLN1	4.63749e-183	0.343357	0.261	0.165	8.3869e-179
GPC1	7.53747e-183	0.181703	0.345	0.23	1.36315e-178
EEF1G	2.38775e-182	0.168787	0.593	0.443	4.31824e-178
GNG4	1.76933e-181	0.286992	0.266	0.167	3.19983e-177
GNL3	3.47156e-181	0.345574	0.228	0.138	6.27831e-177
PDK3	8.79142e-181	1.02913	0.081	0.029	1.58993e-176
TOMM5	2.13287e-180	0.316509	0.304	0.2	3.85729e-176
PSMB2	8.48003e-179	0.2283	0.307	0.201	1.53361e-174
EDF1	1.39553e-178	0.394332	0.156	0.083	2.52381e-174
NLGN4X	5.36424e-178	0.515996	0.118	0.055	9.70123e-174
PTBP3	8.49689e-178	0.272459	0.26	0.163	1.53666e-173
GPRIN2	2.49155e-177	0.982739	0.07	0.022	4.50596e-173
PRXL2A	4.65258e-177	0.29348	0.312	0.207	8.4142e-173
PPP1R1A	3.98024e-176	0.30877	0.219	0.131	7.19827e-172
GSTP1	4.3714e-174	0.268756	0.326	0.22	7.90568e-170
GRK3	1.13964e-173	0.285372	0.199	0.115	2.06104e-169
YIF1A	1.25614e-171	0.396277	0.249	0.159	2.27173e-167
MORF4L2	1.44934e-171	0.402664	0.188	0.109	2.62114e-167
ISLR2	1.80681e-171	0.215733	0.277	0.176	3.26762e-167
EIF1	1.80947e-169	0.156661	0.443	0.317	3.27243e-165
RBM3	2.29203e-169	0.261018	0.294	0.194	4.14513e-165
SLC6A8	5.01569e-169	0.30347	0.261	0.167	9.07088e-165
AP2A1	7.58212e-169	0.267991	0.303	0.202	1.37123e-164
C4orf3	3.20317e-168	0.345314	0.2	0.119	5.79293e-164
OCIAD1	4.04267e-168	0.193777	0.456	0.328	7.31118e-164
CCNI	1.75001e-167	0.130178	0.687	0.536	3.16489e-163
NDUFAB1	1.88675e-167	0.213645	0.345	0.235	3.41218e-163
FADS1	8.7719e-167	0.190665	0.361	0.249	1.5864e-162
COX6A1	3.37585e-166	0.231487	0.308	0.205	6.10523e-162
CASC4	4.09465e-166	0.294772	0.216	0.131	7.40517e-162
MAP7D1	9.33603e-166	0.139603	0.317	0.21	1.68842e-161
DCAF7	4.77722e-165	0.162233	0.443	0.316	8.6396e-161
SEC31A	6.58741e-165	0.20409	0.49	0.36	1.19133e-160
PGAM1	1.85151e-164	0.396778	0.201	0.121	3.34846e-160
DYNC1H1	1.18862e-163	0.202994	0.219	0.133	2.14961e-159
BRWD1	1.95968e-163	0.224002	0.279	0.182	3.54409e-159
GPI	3.11375e-163	0.398313	0.197	0.118	5.63122e-159
PCSK1	4.16334e-163	0.777606	0.109	0.052	7.52941e-159
SPTAN1	4.41253e-163	-0.66822	0.173	0.248	7.98007e-159
RAB6A	4.64424e-163	0.195874	0.42	0.299	8.39911e-159
CDKN2D	4.74515e-163	0.213947	0.309	0.206	8.58161e-159
HK1	1.14146e-162	0.346311	0.225	0.141	2.06433e-158
PPDPF	1.40325e-162	0.117639	0.502	0.366	2.53777e-158
ACHE	1.42206e-162	0.393409	0.175	0.101	2.5718e-158
ZMYM2	6.14259e-162	0.191709	0.393	0.277	1.11089e-157
DSTN	9.69812e-162	0.189423	0.439	0.315	1.7539e-157
PJA2	1.44954e-161	0.172414	0.69	0.541	2.6215e-157
PHPT1	2.0194e-161	0.178965	0.504	0.372	3.65208e-157
MGST3	2.11386e-161	0.263701	0.297	0.2	3.82291e-157
UBE2I	2.84626e-161	0.157552	0.347	0.237	5.14747e-157
SFXN1	6.70533e-161	0.205716	0.338	0.232	1.21266e-156
C7orf50	8.1211e-161	0.198109	0.335	0.228	1.4687e-156
COPG1	1.51814e-160	0.201872	0.415	0.295	2.74555e-156
CHCHD6	2.09132e-160	0.324703	0.154	0.084	3.78216e-156
SMS	3.59585e-160	0.18082	0.287	0.189	6.50309e-156
H1F0	5.39023e-160	0.362707	0.165	0.092	9.74823e-156
PCSK1N	5.72737e-160	0.116188	0.505	0.369	1.03579e-155
MT-ATP6	7.20466e-159	-0.208072	0.895	0.877	1.30296e-154
GATAD1	2.02839e-158	0.320568	0.183	0.107	3.66834e-154
COX7A2L	2.08106e-158	0.162071	0.403	0.286	3.7636e-154
RER1	1.51403e-157	0.343851	0.265	0.175	2.73812e-153
PRDX5	1.96897e-157	0.276426	0.255	0.165	3.56088e-153
CHPF	5.92619e-157	0.412653	0.227	0.145	1.07175e-152
USP14	2.57013e-156	0.2322	0.301	0.203	4.64809e-152
INAFM1	1.17271e-155	0.509589	0.143	0.078	2.12084e-151
SELENOH	6.79019e-155	0.15341	0.459	0.333	1.22801e-150
SEZ6L	6.15641e-154	0.192105	0.232	0.145	1.11339e-149
DCXR	6.60629e-154	0.431394	0.142	0.077	1.19475e-149
GOLT1B	9.45386e-154	0.308718	0.238	0.153	1.70973e-149
ECEL1	2.6238e-153	0.171771	0.341	0.234	4.74515e-149
CADM1	8.10755e-153	0.121895	0.51	0.376	1.46625e-148
TRAP1	4.6776e-151	0.240099	0.275	0.183	8.45944e-147
ZNF141	9.50675e-151	0.351361	0.155	0.087	1.7193e-146
NUP58	9.83264e-151	0.280064	0.302	0.207	1.77823e-146
ZNF558	1.04399e-150	-3.54494	0.002	0.018	1.88805e-146
CELF1	2.13357e-150	0.146875	0.326	0.223	3.85857e-146
ENO1	8.52822e-150	0.349302	0.268	0.181	1.54233e-145
UNC119	9.06323e-150	0.414249	0.163	0.094	1.63909e-145
LSM4	9.09368e-150	0.239651	0.284	0.191	1.64459e-145
KLC1	2.39798e-149	-0.709634	0.156	0.224	4.33675e-145
NHP2	2.57163e-149	0.186711	0.4	0.286	4.65079e-145
WARS	2.92685e-149	0.387877	0.205	0.128	5.29321e-145
PBX3	3.64692e-149	0.111576	0.296	0.195	6.59545e-145
NDUFV2	4.64381e-148	0.17768	0.318	0.218	8.39832e-144
ANAPC16	4.87529e-148	0.23106	0.302	0.206	8.81697e-144
MED8	4.90671e-148	0.439647	0.2	0.125	8.87379e-144
TMEM9	8.36563e-147	0.11708	0.315	0.214	1.51292e-142
C18orf32	1.72009e-146	0.167067	0.277	0.184	3.11079e-142
LSM7	1.76883e-146	0.171304	0.377	0.268	3.19894e-142
CYB5R3	2.11034e-146	0.215757	0.287	0.193	3.81655e-142
COX16	3.79975e-146	0.20595	0.237	0.153	6.87185e-142
DPYSL4	4.03314e-146	0.11428	0.329	0.224	7.29394e-142
CHD2	4.64436e-146	0.119065	0.416	0.297	8.39933e-142
IMPDH2	9.48059e-146	0.338736	0.226	0.146	1.71456e-141
TSG101	1.212e-145	0.238854	0.169	0.098	2.1919e-141
NDUFB9	1.98734e-145	0.189947	0.329	0.228	3.59411e-141
WDR83OS	3.72375e-145	0.173404	0.398	0.285	6.73441e-141
CD63	9.69792e-145	0.319476	0.28	0.191	1.75387e-140
EMC7	1.067e-144	0.256155	0.309	0.214	1.92968e-140
GLG1	1.55811e-144	0.372471	0.172	0.102	2.81784e-140
C16orf58	2.66755e-143	0.260326	0.252	0.167	4.82427e-139
TMEM205	2.92053e-143	0.418646	0.178	0.108	5.28179e-139
DDX1	4.21439e-143	0.184804	0.289	0.195	7.62172e-139
RNF7	6.38412e-143	0.154887	0.395	0.283	1.15457e-138
EIF1B	6.91811e-143	0.116217	0.485	0.357	1.25114e-138
RIMS3	7.7298e-143	0.27471	0.161	0.093	1.39793e-138
VDAC1	7.7917e-143	0.302275	0.179	0.108	1.40913e-138
NDUFB7	8.91802e-143	0.190761	0.285	0.192	1.61282e-138
FAM241B	9.52719e-143	0.148335	0.326	0.225	1.72299e-138
ARPC2	5.23853e-142	0.341062	0.194	0.12	9.47388e-138
MLEC	1.91097e-141	0.326901	0.224	0.145	3.456e-137
CPNE1	2.43844e-141	0.186371	0.257	0.169	4.40992e-137
DDOST	3.32918e-141	0.425482	0.126	0.067	6.02082e-137
RCN1	1.26176e-140	0.434624	0.125	0.067	2.28189e-136
CXXC5	2.04057e-140	0.430132	0.118	0.061	3.69037e-136
NDUFC2	3.93061e-140	0.152488	0.348	0.244	7.10851e-136
EI24	7.41312e-140	0.293094	0.227	0.147	1.34066e-135
CANX	1.56173e-139	0.254445	0.229	0.149	2.82438e-135
EMC10	4.79561e-139	0.145443	0.37	0.262	8.67287e-135
DDT	2.13605e-138	0.343954	0.172	0.103	3.86304e-134
TOMM20	6.26315e-138	0.100038	0.442	0.323	1.13269e-133
TMEM183A	7.46217e-138	0.219427	0.278	0.189	1.34953e-133
HSPD1	8.38861e-138	0.217108	0.238	0.156	1.51708e-133
COX6C	1.1698e-137	0.192825	0.299	0.206	2.11558e-133
TAF7	1.46558e-137	0.1166	0.358	0.252	2.6505e-133
RHBDD2	2.94864e-137	0.126856	0.438	0.32	5.33261e-133
TMSB10	6.89157e-137	0.150942	0.896	0.801	1.24634e-132
ATP6AP1	8.02213e-137	0.13687	0.399	0.288	1.4508e-132
TSPAN4	1.00189e-136	0.514226	0.114	0.059	1.81192e-132
SLC25A4	1.39773e-136	0.177641	0.26	0.173	2.5278e-132
RLF	1.43223e-136	0.234913	0.22	0.142	2.59019e-132
STT3A	2.40866e-136	0.257012	0.291	0.202	4.35606e-132
ARF1	2.45498e-136	0.13966	0.434	0.317	4.43983e-132
BSG	8.1682e-136	0.225969	0.223	0.144	1.47722e-131
SSR4	8.6022e-136	0.296505	0.233	0.154	1.55571e-131
GRIK5	2.17607e-135	0.135208	0.249	0.162	3.93542e-131
MYH10	6.79896e-135	0.117841	0.284	0.192	1.22959e-130
GPT2	8.46589e-135	0.483459	0.136	0.077	1.53106e-130
NXPH1	1.13613e-134	-1.56979	0.039	0.077	2.05469e-130
TMEM263	5.14092e-134	0.291901	0.274	0.19	9.29735e-130
HSPA1B	6.8077e-134	-0.766492	0.086	0.139	1.23117e-129
DDX24	7.54276e-134	0.128319	0.353	0.251	1.36411e-129
GYG2	1.20188e-133	0.851233	0.055	0.018	2.17359e-129
PER1	2.27165e-133	0.510001	0.142	0.083	4.10828e-129
EID1	2.30634e-133	0.110912	0.598	0.458	4.17101e-129
CDC37	2.44511e-133	0.196143	0.28	0.191	4.42199e-129
CDK5RAP3	2.9083e-133	0.161733	0.331	0.232	5.25965e-129
UGCG	3.34554e-133	0.214246	0.221	0.143	6.05041e-129
DNAJC10	4.85501e-133	0.282743	0.222	0.145	8.78029e-129
CRIPT	5.06555e-133	0.212254	0.304	0.212	9.16105e-129
GORASP2	6.38937e-133	0.309629	0.231	0.153	1.15552e-128
DPCD	9.74669e-133	0.375571	0.152	0.089	1.76269e-128
COPB1	9.97386e-133	0.184342	0.36	0.258	1.80377e-128
PPP1R3C	1.04277e-132	1.06454	0.064	0.025	1.88585e-128
BRI3	1.14026e-132	0.137553	0.406	0.294	2.06216e-128
DNAH14	1.88827e-132	0.36852	0.128	0.07	3.41493e-128
PARP6	4.18359e-132	0.194785	0.251	0.168	7.56602e-128
CCDC47	4.18942e-132	0.317321	0.208	0.134	7.57657e-128
PRNP	4.00734e-131	0.211611	0.259	0.175	7.24728e-127
NDN	4.20963e-131	0.123437	0.319	0.221	7.61312e-127
CTSB	5.6606e-131	0.226524	0.234	0.154	1.02372e-126
DYM	1.23816e-130	0.14276	0.307	0.213	2.23922e-126
RBPJ	2.0876e-130	0.327807	0.157	0.093	3.77542e-126
EFS	2.93898e-130	0.702812	0.106	0.055	5.31515e-126
PAM16	6.53897e-130	0.340614	0.205	0.132	1.18257e-125
G6PC3	6.78578e-130	0.35117	0.15	0.088	1.22721e-125
P4HB	7.60001e-130	0.380344	0.197	0.126	1.37446e-125
NSF	1.97413e-129	0.17047	0.293	0.202	3.57022e-125
TTYH1	2.82928e-129	0.173626	0.315	0.222	5.11675e-125
SEC61B	4.10869e-129	0.317199	0.208	0.135	7.43056e-125
KDELR2	5.07217e-129	0.277818	0.238	0.16	9.17301e-125
CNRIP1	5.46306e-129	0.236567	0.169	0.102	9.87994e-125
PRKRA	2.1252e-128	0.207446	0.192	0.12	3.84343e-124
GTF2H5	2.41304e-128	0.257683	0.166	0.1	4.36399e-124
DCAF8	4.33901e-128	0.162909	0.264	0.179	7.8471e-124
SLC44A2	4.56804e-128	0.146847	0.285	0.196	8.26129e-124
GAS7	4.83898e-128	0.144179	0.193	0.12	8.75129e-124
MPC1	6.23275e-128	0.305206	0.302	0.215	1.12719e-123
RAB5C	8.10571e-128	0.162912	0.278	0.19	1.46592e-123
MDH2	1.85407e-127	0.241147	0.19	0.12	3.35308e-123
TMX2	1.89587e-127	0.217089	0.322	0.229	3.42869e-123
ZNF146	2.94001e-127	0.210712	0.253	0.171	5.317e-123
PCMT1	3.50016e-127	0.183097	0.281	0.194	6.33005e-123
ARCN1	6.33438e-127	0.218859	0.28	0.194	1.14557e-122
NDUFB2	9.86718e-127	0.280308	0.186	0.117	1.78448e-122
GOT2	1.56639e-126	0.18904	0.205	0.132	2.83281e-122
GABRA2	1.89704e-126	0.119851	0.212	0.135	3.4308e-122
LRP11	1.98785e-126	0.293807	0.167	0.102	3.59502e-122
LRPAP1	3.3598e-126	0.196725	0.212	0.138	6.0762e-122
PYGB	3.76821e-126	0.138734	0.298	0.207	6.81481e-122
MAGEH1	4.48277e-126	0.12416	0.494	0.37	8.1071e-122
FSCN1	5.89651e-126	0.12243	0.249	0.166	1.06638e-121
MAP1A	1.23623e-125	0.234967	0.22	0.145	2.23573e-121
NDUFA5	2.82936e-125	0.15814	0.237	0.157	5.1169e-121
CREB3	2.87516e-125	0.238116	0.272	0.188	5.19972e-121
RND2	3.17383e-125	0.197525	0.177	0.109	5.73987e-121
GOLGA5	3.3712e-125	0.35877	0.148	0.087	6.09681e-121
GNAI3	4.44978e-125	0.191927	0.277	0.191	8.04743e-121
RIC3	5.23096e-125	0.122683	0.241	0.16	9.46019e-121
GRB10	5.43896e-125	0.268355	0.154	0.092	9.83637e-121
TSTD1	2.54154e-124	2.11249	0.031	0.005	4.59637e-120
DDX18	6.46601e-124	0.288321	0.225	0.15	1.16938e-119
SLC43A2	8.36606e-124	0.170113	0.202	0.129	1.513e-119
GOLGA8B	1.02237e-123	0.34316	0.143	0.084	1.84896e-119
LY6H	1.03489e-123	0.125542	0.297	0.205	1.8716e-119
COG3	2.07993e-123	0.239669	0.261	0.18	3.76156e-119
SPINT2	3.08754e-123	0.219146	0.25	0.17	5.58381e-119
FZD5	4.70517e-123	0.744738	0.083	0.039	8.50931e-119
RGMA	4.87092e-123	0.128639	0.234	0.155	8.80906e-119
MSTO1	5.06114e-123	0.260188	0.253	0.173	9.15308e-119
TBC1D9B	6.5213e-123	0.169245	0.22	0.144	1.17938e-118
ATP6V0D1	6.69765e-123	0.162885	0.277	0.191	1.21127e-118
RNH1	9.0707e-123	0.25843	0.209	0.137	1.64044e-118
UBE2D3	2.1568e-122	0.149858	0.318	0.224	3.90057e-118
PSMD13	4.04845e-122	0.175074	0.281	0.195	7.32162e-118
GNL2	7.58783e-122	0.309829	0.149	0.089	1.37226e-117
ESD	8.03329e-122	0.140755	0.253	0.171	1.45282e-117
ATG4A	1.33904e-121	0.730563	0.072	0.031	2.42165e-117
TOMM6	1.37224e-121	0.465718	0.126	0.071	2.4817e-117
GPR162	1.4687e-121	0.241452	0.16	0.097	2.65615e-117
ANO8	2.24704e-121	0.14764	0.326	0.231	4.06377e-117
CNBP	3.75865e-121	0.126242	0.364	0.263	6.79752e-117
GFM1	5.42423e-121	0.254089	0.15	0.089	9.80971e-117
METAP2	5.79039e-121	0.379833	0.135	0.078	1.04719e-116
TOMM70	8.9557e-121	0.204941	0.201	0.13	1.61964e-116
GDAP1	9.1844e-121	0.121551	0.256	0.173	1.661e-116
STK25	9.2376e-121	0.132228	0.272	0.187	1.67062e-116
DEAF1	2.37336e-120	0.157865	0.207	0.134	4.29222e-116
DAD1	2.42003e-120	0.374062	0.176	0.111	4.37662e-116
QARS	2.45931e-120	0.222375	0.209	0.137	4.44766e-116
NAPA	2.68302e-120	0.227835	0.281	0.197	4.85225e-116
ACSL4	1.94165e-119	0.154478	0.179	0.112	3.51148e-115
GPR85	2.32185e-119	0.128958	0.172	0.106	4.19907e-115
PRDX4	2.99663e-119	0.398074	0.131	0.076	5.41941e-115
RGMB	3.59214e-119	0.177909	0.215	0.141	6.49639e-115
DICER1	5.79998e-119	0.111003	0.289	0.201	1.04893e-114
SEC24A	1.38109e-118	0.350249	0.214	0.144	2.4977e-114
ZDBF2	1.6713e-118	0.397781	0.106	0.057	3.02255e-114
SAMD1	3.67654e-118	0.165391	0.198	0.127	6.64902e-114
HINT1	3.87431e-118	0.175646	0.19	0.121	7.0067e-114
CIB1	4.91275e-118	0.693062	0.111	0.061	8.88471e-114
TTC3	6.69975e-118	0.110012	0.775	0.627	1.21165e-113
DDB1	7.09966e-118	0.121319	0.394	0.29	1.28397e-113
CEBPG	1.45244e-117	0.244018	0.216	0.144	2.62674e-113
DNAJC6	2.09156e-117	0.212285	0.18	0.113	3.78259e-113
MAPK8IP1	2.58457e-117	0.119591	0.376	0.274	4.67419e-113
LCMT1	3.74887e-117	0.226718	0.202	0.132	6.77983e-113
RNF4	4.03522e-117	0.364653	0.114	0.062	7.29769e-113
SERP1	6.71739e-117	0.288745	0.218	0.146	1.21484e-112
SHOC2	1.17694e-116	0.151844	0.267	0.184	2.12849e-112
MFSD8	2.24832e-116	0.321511	0.135	0.079	4.06609e-112
MRNIP	2.83767e-116	0.190286	0.227	0.153	5.13192e-112
HSP90B1	3.08563e-116	0.534852	0.088	0.044	5.58036e-112
NGRN	5.58748e-116	0.132224	0.312	0.222	1.0105e-111
PDCD4	7.78981e-116	0.141225	0.255	0.175	1.40879e-111
OS9	9.62923e-116	0.117796	0.285	0.199	1.74145e-111
ZNF664	9.76948e-116	0.175631	0.263	0.182	1.76681e-111
PFDN5	1.66585e-115	0.148437	0.269	0.187	3.01269e-111
CLU	1.8147e-115	0.278665	0.208	0.138	3.28188e-111
GDAP2	2.55757e-115	0.266593	0.152	0.092	4.62537e-111
GAREM2	2.56157e-115	0.397304	0.11	0.06	4.6326e-111
LRIF1	3.28408e-115	0.373944	0.156	0.097	5.93926e-111
RAB5A	3.73976e-115	0.231712	0.202	0.133	6.76335e-111
BCAT1	3.77567e-115	0.302018	0.154	0.094	6.82829e-111
TCEAL8	4.40049e-115	0.20101	0.173	0.109	7.95829e-111
SF3B3	6.26396e-115	0.14297	0.27	0.187	1.13284e-110
METTL26	6.41081e-115	0.241365	0.198	0.129	1.1594e-110
TAC1	6.71866e-115	0.6204	0.088	0.044	1.21507e-110
SURF1	7.94333e-115	0.340282	0.166	0.105	1.43655e-110
PEG10	1.38983e-114	0.135606	0.881	0.801	2.51351e-110
COQ4	1.49017e-114	0.178135	0.225	0.151	2.69496e-110
CHMP2A	1.51375e-114	0.167843	0.277	0.195	2.73762e-110
RCN2	1.5829e-114	0.237152	0.204	0.135	2.86268e-110
GALNT2	2.70383e-114	0.195887	0.13	0.075	4.88988e-110
CFAP36	4.49307e-114	0.264046	0.176	0.112	8.12572e-110
TPST1	4.70872e-114	0.186693	0.223	0.15	8.51572e-110
SCCPDH	5.61566e-114	0.149337	0.202	0.131	1.01559e-109
SYNGR3	6.75268e-114	0.16252	0.216	0.144	1.22122e-109
PSAT1	7.66197e-114	0.265822	0.175	0.112	1.38567e-109
SEC22A	1.21339e-113	0.462433	0.128	0.075	2.19442e-109
SDR39U1	1.37118e-113	0.164655	0.261	0.181	2.47978e-109
MAF1	1.44818e-113	0.181879	0.222	0.149	2.61903e-109
LRP3	1.54256e-113	0.152162	0.26	0.18	2.78971e-109
PPIG	1.67088e-113	0.183031	0.212	0.141	3.02179e-109
TCTEX1D2	1.6754e-113	0.160465	0.194	0.125	3.02997e-109
LAMA5	1.68076e-113	0.529316	0.089	0.045	3.03965e-109
GOSR1	1.97266e-113	0.340156	0.113	0.062	3.56756e-109
MAP2K1	3.45267e-113	0.426479	0.138	0.083	6.24416e-109
MAGED1	5.68212e-113	0.11413	0.745	0.602	1.02761e-108
CUTA	6.50257e-113	0.120676	0.366	0.268	1.17599e-108
SQLE	6.76226e-113	0.22984	0.235	0.161	1.22295e-108
DMTF1	7.82476e-113	0.151479	0.269	0.187	1.41511e-108
ERLEC1	9.11151e-113	0.204504	0.231	0.157	1.64782e-108
ATP5F1E	1.25651e-112	0.104659	0.362	0.264	2.27239e-108
GON4L	1.71241e-112	0.304093	0.156	0.097	3.0969e-108
NME2	2.77704e-112	0.236357	0.172	0.109	5.02227e-108
TCP1	6.35255e-112	0.183717	0.251	0.173	1.14886e-107
TMEM256	7.59315e-112	0.272561	0.148	0.09	1.37322e-107
RNF138	8.70599e-112	0.269785	0.134	0.079	1.57448e-107
CIAO1	1.02854e-111	0.179911	0.241	0.165	1.86011e-107
AP3D1	1.20661e-111	0.122228	0.366	0.269	2.18215e-107
ATP1B1	1.27299e-111	0.195623	0.209	0.138	2.30219e-107
GALNT1	1.34334e-111	0.148444	0.16	0.099	2.42943e-107
DDIT4	1.75508e-111	0.15384	0.405	0.304	3.17407e-107
TMX4	2.03011e-111	0.111325	0.237	0.16	3.67145e-107
RNF181	2.19222e-111	0.301371	0.183	0.119	3.96463e-107
RAB18	2.41683e-111	0.136539	0.273	0.191	4.37083e-107
BTG1	2.76046e-111	0.113473	0.332	0.24	4.99229e-107
TMEM50B	3.95221e-111	0.31512	0.183	0.12	7.14757e-107
RO60	4.22493e-111	0.110441	0.363	0.267	7.64079e-107
RAP2C	4.72022e-111	0.308423	0.114	0.064	8.53652e-107
NUFIP2	5.22711e-111	0.190365	0.233	0.159	9.45322e-107
GPRASP2	5.27694e-111	0.230357	0.123	0.07	9.54335e-107
TMF1	6.685e-111	0.210235	0.261	0.184	1.20898e-106
LINGO1	8.69596e-111	0.115476	0.346	0.252	1.57266e-106
CFAP20	8.7924e-111	0.198053	0.244	0.169	1.5901e-106
COPA	9.05923e-111	0.135616	0.422	0.318	1.63836e-106
PFKP	9.43735e-111	0.351199	0.193	0.128	1.70674e-106
GET3	1.09733e-110	0.267795	0.139	0.083	1.98452e-106
XBP1	1.20161e-110	0.413993	0.147	0.091	2.17312e-106
TMEM208	1.33326e-110	0.247407	0.22	0.149	2.4112e-106
SEC23A	1.69506e-110	0.220746	0.25	0.174	3.06552e-106
PRKAR2A	2.11305e-110	0.265304	0.18	0.117	3.82145e-106
APMAP	2.13747e-110	0.146849	0.294	0.21	3.86561e-106
COL18A1	2.99341e-110	0.999555	0.042	0.013	5.41359e-106
SNCB	3.30434e-110	0.397761	0.116	0.066	5.97591e-106
ARFGAP3	4.22712e-110	0.217221	0.219	0.148	7.64475e-106
GABRG3	4.84421e-110	0.460857	0.059	0.024	8.76075e-106
CAPNS1	4.91375e-110	0.196241	0.196	0.129	8.88652e-106
TOMM40	5.75292e-110	0.310754	0.179	0.117	1.04042e-105
ZCRB1	6.20643e-110	0.201689	0.217	0.146	1.12243e-105
DIXDC1	7.51167e-110	0.20452	0.153	0.094	1.35849e-105
TRAPPC3	9.12493e-110	0.177578	0.236	0.161	1.65024e-105
COX5B	1.04299e-109	0.333156	0.126	0.074	1.88624e-105
FAR1	1.07609e-109	0.22862	0.193	0.127	1.94611e-105
ZDHHC17	2.12455e-109	0.13459	0.253	0.175	3.84224e-105
LIN7B	2.72527e-109	0.318443	0.143	0.087	4.92865e-105
GPR173	3.11062e-109	0.104499	0.381	0.281	5.62556e-105
OAZ1	5.3203e-109	0.103389	0.697	0.557	9.62177e-105
PRKAB1	5.34539e-109	0.207902	0.219	0.149	9.66714e-105
SEC24C	7.99064e-109	0.153842	0.288	0.206	1.44511e-104
RBX1	9.10014e-109	0.1422	0.24	0.164	1.64576e-104
CKAP4	9.62246e-109	0.158568	0.169	0.107	1.74022e-104
ZIM2	1.06557e-108	1.8981	0.028	0.005	1.92708e-104
RIPOR1	1.33739e-108	0.129935	0.174	0.111	2.41866e-104
CALR	2.33097e-108	0.26682	0.158	0.099	4.21557e-104
ACTR10	2.69373e-108	0.103042	0.33	0.238	4.87161e-104
RBM25	3.36938e-108	0.121588	0.282	0.199	6.09353e-104
BTBD17	5.0792e-108	0.398615	0.137	0.083	9.18573e-104
GRB2	7.34136e-108	0.141458	0.184	0.119	1.32769e-103
MTMR4	8.34098e-108	0.110755	0.181	0.116	1.50847e-103
CNTFR	8.6898e-108	0.119341	0.214	0.143	1.57155e-103
MOAP1	9.99931e-108	0.113638	0.269	0.188	1.80838e-103
GALNT16	1.10823e-107	0.313496	0.092	0.047	2.00423e-103
NAA38	1.11417e-107	0.245017	0.183	0.119	2.01498e-103
ARMCX1	1.33956e-107	0.229731	0.207	0.139	2.4226e-103
TMEM68	1.96581e-107	0.1221	0.235	0.161	3.55517e-103
TMEM41B	2.09528e-107	0.148906	0.237	0.163	3.78931e-103
BCKDHA	2.4474e-107	0.447708	0.122	0.072	4.42613e-103
PRAF2	5.27901e-107	0.189536	0.203	0.136	9.54709e-103
NME1	6.37091e-107	0.133138	0.234	0.161	1.15218e-102
RMND5A	7.08789e-107	0.117475	0.237	0.163	1.28184e-102
RNPS1	8.16121e-107	0.132624	0.294	0.21	1.47595e-102
TMEM33	8.7229e-107	0.123323	0.305	0.22	1.57754e-102
GPX4	8.77974e-107	0.113147	0.48	0.364	1.58782e-102
RNMT	9.08488e-107	0.186215	0.256	0.18	1.643e-102
ZKSCAN1	1.07143e-106	0.116645	0.24	0.164	1.93769e-102
TMEM248	1.07428e-106	0.270919	0.172	0.111	1.94283e-102
LAPTM4A	1.10913e-106	0.302522	0.17	0.11	2.00586e-102
PPP2R5B	1.26424e-106	0.122131	0.277	0.196	2.28638e-102
ALDOC	1.30042e-106	0.526934	0.109	0.062	2.35181e-102
LMBR1L	2.91928e-106	0.118868	0.168	0.106	5.27951e-102
TIMP1	3.39234e-106	0.533809	0.106	0.06	6.13504e-102
IMMP1L	4.21265e-106	0.376148	0.115	0.066	7.61859e-102
CXXC4	4.2148e-106	0.135224	0.199	0.132	7.62247e-102
SELENOS	4.4813e-106	0.273217	0.202	0.137	8.10443e-102
ZNF331	5.39548e-106	0.487531	0.112	0.064	9.75772e-102
SMAP1	1.01311e-105	0.113184	0.246	0.17	1.83222e-101
TMEM63C	1.01399e-105	0.344774	0.135	0.082	1.83379e-101
APBB3	1.32434e-105	0.17785	0.28	0.2	2.39508e-101
SLC25A36	1.54665e-105	0.144438	0.262	0.184	2.79712e-101
CHTOP	1.61026e-105	0.108158	0.292	0.209	2.91215e-101
MLH1	2.0625e-105	0.262997	0.169	0.109	3.73003e-101
CHCHD3	5.2504e-105	0.313821	0.131	0.078	9.49534e-101
OST4	6.80972e-105	0.292653	0.148	0.092	1.23154e-100
SNRPD2	6.90496e-105	0.18742	0.207	0.139	1.24876e-100
GABARAPL2	7.31315e-105	0.173974	0.218	0.148	1.32258e-100
FAM168B	8.94252e-105	0.120235	0.263	0.185	1.61726e-100
FARSB	9.47461e-105	0.14559	0.291	0.208	1.71348e-100
UBE2J1	1.00449e-104	0.171952	0.177	0.115	1.81662e-100
FIBP	1.01919e-104	0.391361	0.123	0.072	1.8432e-100
UFM1	1.39909e-104	0.186402	0.304	0.221	2.53025e-100
NUCB2	1.41733e-104	0.186294	0.228	0.157	2.56324e-100
LRRC61	1.78734e-104	3.12338	0.019	0.001	3.23241e-100
GPR107	2.38229e-104	0.175562	0.325	0.238	4.30836e-100
VHL	2.85702e-104	0.10127	0.306	0.219	5.16693e-100
LMO1	4.71625e-104	0.307482	0.181	0.119	8.52933e-100
SPG21	5.24097e-104	0.134736	0.209	0.14	9.4783e-100
RAB5B	5.39084e-104	0.108093	0.206	0.137	9.74933e-100
COPB2	5.62757e-104	0.152088	0.335	0.247	1.01775e-99
ERBB4	1.03901e-103	-1.55761	0.036	0.068	1.87905e-99
MMD	1.10655e-103	0.119197	0.189	0.124	2.00119e-99
MDH1	1.42029e-103	0.264394	0.164	0.105	2.56859e-99
CTSF	2.55224e-103	0.911074	0.051	0.02	4.61572e-99
CYB5B	3.98507e-103	0.106381	0.24	0.166	7.207e-99
TCEAL7	4.48154e-103	0.138255	0.188	0.123	8.10487e-99
WSB1	5.5379e-103	0.159172	0.793	0.675	1.00153e-98
GTF2A1	8.39299e-103	0.160475	0.162	0.103	1.51787e-98
SNRPC	9.92917e-103	0.128908	0.256	0.18	1.79569e-98
POLR2I	1.32386e-102	0.150052	0.219	0.15	2.3942e-98
CRLS1	1.36635e-102	0.28494	0.146	0.091	2.47105e-98
RETREG2	1.41425e-102	0.110832	0.235	0.162	2.55767e-98
OSBPL2	1.6887e-102	0.22673	0.218	0.15	3.05401e-98
MAP2K4	2.51079e-102	0.18513	0.194	0.129	4.54077e-98
GNAZ	2.57341e-102	0.136524	0.131	0.078	4.65401e-98
CNPY2	2.77657e-102	0.212498	0.222	0.153	5.02142e-98
DROSHA	4.21225e-102	0.175369	0.218	0.149	7.61785e-98
GGA2	4.8091e-102	0.35928	0.113	0.065	8.69726e-98
WDR45B	6.30534e-102	0.218292	0.228	0.159	1.14032e-97
C1orf43	6.95161e-102	0.301654	0.145	0.09	1.2572e-97
LRRC41	7.83382e-102	0.112814	0.218	0.149	1.41675e-97
CAMLG	7.98802e-102	0.206854	0.242	0.17	1.44463e-97
ELP1	1.26227e-101	0.244845	0.176	0.115	2.28282e-97
ATPAF1	1.27641e-101	0.214116	0.176	0.115	2.3084e-97
SEC23IP	1.46103e-101	0.346609	0.131	0.079	2.64228e-97
PSMD1	2.19797e-101	0.133851	0.233	0.162	3.97502e-97
TSPYL1	2.81586e-101	0.10137	0.25	0.174	5.09248e-97
NDUFS8	3.22556e-101	0.449512	0.092	0.05	5.83342e-97
WDR54	3.28134e-101	0.365328	0.144	0.09	5.93431e-97
ZFHX3	3.37174e-101	0.216362	0.113	0.065	6.09779e-97
NDUFB6	4.84131e-101	0.151277	0.226	0.156	8.75551e-97
CIAO2B	5.02069e-101	0.272639	0.143	0.089	9.07992e-97
THRAP3	5.36331e-101	0.119896	0.236	0.164	9.69955e-97
ALDH18A1	5.80257e-101	0.280678	0.162	0.105	1.0494e-96
GPR27	7.88064e-101	0.141592	0.153	0.096	1.42521e-96
NDUFC1	8.56468e-101	0.159958	0.204	0.138	1.54892e-96
DHX40	9.20415e-101	0.181248	0.188	0.125	1.66457e-96
NALCN	1.55195e-100	0.199784	0.164	0.105	2.8067e-96
NUTF2	1.65103e-100	0.235977	0.17	0.111	2.98589e-96
CLNS1A	3.40583e-100	0.170385	0.157	0.099	6.15943e-96
GSE1	4.80469e-100	0.136994	0.22	0.15	8.68928e-96
MAGEF1	5.91505e-100	0.104334	0.277	0.198	1.06974e-95
GANAB	8.3632e-100	0.31229	0.101	0.056	1.51248e-95
KDM6A	1.07145e-99	0.560688	0.09	0.049	1.93772e-95
BET1L	1.27117e-99	0.271378	0.186	0.125	2.2989e-95
ANKRD6	1.32171e-99	0.300257	0.119	0.071	2.39032e-95
API5	1.36547e-99	0.107386	0.309	0.225	2.46945e-95
COX8A	1.62851e-99	0.199214	0.176	0.116	2.94515e-95
TLE4	2.00415e-99	0.257728	0.134	0.081	3.6245e-95
ZYG11B	2.37311e-99	0.11755	0.209	0.142	4.29177e-95
FAM171B	2.40557e-99	0.113517	0.257	0.181	4.35048e-95
CALU	2.79213e-99	0.242306	0.259	0.186	5.04958e-95
GALNT11	3.44884e-99	0.152364	0.148	0.093	6.23722e-95
RNASEK	3.6961e-99	0.114505	0.221	0.152	6.6844e-95
ACBD3	4.63487e-99	0.189732	0.242	0.171	8.38216e-95
ACBD6	5.94401e-99	0.105741	0.243	0.17	1.07497e-94
SPCS1	6.06966e-99	0.144524	0.33	0.243	1.0977e-94
MYDGF	6.63081e-99	0.224168	0.214	0.148	1.19918e-94
TRAPPC11	1.11122e-98	0.205202	0.178	0.118	2.00964e-94
TMED10	1.149e-98	0.276059	0.139	0.087	2.07798e-94
TRAPPC6A	2.02559e-98	0.396538	0.117	0.07	3.66328e-94
TNFRSF25	5.31341e-98	0.258881	0.117	0.069	9.60929e-94
C1orf122	6.06301e-98	0.125598	0.266	0.19	1.0965e-93
ZCCHC17	7.12267e-98	0.136865	0.248	0.175	1.28814e-93
SERF2	8.12939e-98	0.140342	0.278	0.201	1.4702e-93
ISYNA1	9.83018e-98	0.145915	0.176	0.115	1.77779e-93
GFPT1	1.97361e-97	0.174383	0.29	0.212	3.56927e-93
TAF10	2.19612e-97	0.122112	0.272	0.196	3.97169e-93
PRKCB	2.72172e-97	0.189462	0.133	0.081	4.92222e-93
SOX4	2.98634e-97	-0.361657	0.74	0.715	5.4008e-93
GAB2	3.36297e-97	0.143171	0.14	0.087	6.08193e-93
ZEB1	3.91527e-97	0.151638	0.185	0.123	7.08076e-93
DPH7	4.47445e-97	0.243727	0.186	0.125	8.09204e-93
SLC25A1	4.8342e-97	0.16931	0.171	0.112	8.74264e-93
FUCA1	5.38972e-97	0.422477	0.114	0.068	9.74731e-93
CNOT9	6.19216e-97	0.111127	0.265	0.189	1.11985e-92
ZBTB25	7.26636e-97	0.234786	0.162	0.105	1.31412e-92
CLTB	9.2149e-97	0.123252	0.227	0.158	1.66651e-92
TAF13	1.08347e-96	0.288861	0.191	0.13	1.95946e-92
FAIM2	6.74752e-96	0.198499	0.183	0.123	1.22029e-91
EIF4B	7.90484e-96	0.197731	0.168	0.11	1.42959e-91
PDIA3	7.92576e-96	0.269069	0.12	0.072	1.43337e-91
CKB	9.53135e-96	0.131049	0.684	0.559	1.72375e-91
REPS1	1.14304e-95	0.138387	0.182	0.121	2.06719e-91
ATP6V0C	1.15932e-95	0.106659	0.288	0.209	2.09663e-91
ERCC1	1.39564e-95	0.165646	0.221	0.154	2.52401e-91
CXCR4	1.98339e-95	0.418494	0.132	0.083	3.58697e-91
SEC61A2	3.0517e-95	0.324723	0.119	0.071	5.519e-91
EIF3J	3.78813e-95	0.187367	0.197	0.134	6.85083e-91
ARPC3	4.10304e-95	0.523509	0.092	0.05	7.42034e-91
SEPHS2	7.18341e-95	0.358527	0.131	0.081	1.29912e-90
PTGES2	8.78825e-95	0.152605	0.22	0.153	1.58936e-90
NAGK	1.70468e-94	0.106224	0.25	0.177	3.08291e-90
COA3	1.88893e-94	0.117602	0.22	0.152	3.41613e-90
NDUFA7	2.18377e-94	0.201558	0.187	0.126	3.94936e-90
PUF60	2.3004e-94	0.101301	0.287	0.208	4.16027e-90
SPINK5	3.00764e-94	1.5564	0.024	0.005	5.43932e-90
LAMTOR3	4.41194e-94	0.183869	0.227	0.159	7.97899e-90
MON2	4.58486e-94	0.237635	0.166	0.109	8.29172e-90
PNPO	4.64318e-94	-1.79031	0.01	0.028	8.39719e-90
SIKE1	4.90982e-94	0.198162	0.211	0.147	8.87941e-90
SGTA	5.28452e-94	0.118363	0.272	0.196	9.55706e-90
SNF8	7.8164e-94	0.15427	0.262	0.189	1.4136e-89
GPRC5C	7.97594e-94	0.882232	0.046	0.018	1.44245e-89
TMED2	8.91341e-94	0.364431	0.136	0.086	1.61199e-89
TMED3	1.1228e-93	0.265015	0.182	0.124	2.03058e-89
PITRM1	1.39171e-93	0.173891	0.175	0.116	2.51691e-89
ZNF263	1.63761e-93	0.348238	0.139	0.088	2.96162e-89
PTPN12	1.73492e-93	0.107274	0.196	0.133	3.1376e-89
TRAM1	2.07878e-93	0.199041	0.178	0.12	3.75947e-89
PAK2	2.36159e-93	0.122336	0.202	0.138	4.27093e-89
ELP2	3.457e-93	0.201342	0.199	0.137	6.25198e-89
SLC25A39	5.8205e-93	0.160818	0.183	0.123	1.05264e-88
MANF	9.00678e-93	0.225996	0.154	0.1	1.62888e-88
NENF	9.05493e-93	0.390764	0.08	0.042	1.63758e-88
RNF208	1.17263e-92	0.281625	0.111	0.066	2.12069e-88
ELOVL5	1.50131e-92	0.202813	0.237	0.169	2.71512e-88
GOLGB1	1.52443e-92	0.149623	0.134	0.083	2.75694e-88
GFRA2	2.27805e-92	0.365408	0.083	0.044	4.11985e-88
OXA1L	2.39292e-92	0.156044	0.175	0.117	4.3276e-88
DEK	2.52217e-92	0.174419	0.1	0.057	4.56134e-88
PSMA2	3.22071e-92	0.286327	0.141	0.09	5.82465e-88
CTNNBIP1	4.87552e-92	0.120691	0.19	0.128	8.81739e-88
COX18	7.64698e-92	0.225988	0.154	0.1	1.38296e-87
NEFL	1.56083e-91	0.243728	0.142	0.09	2.82276e-87
CAPN2	1.59426e-91	0.173711	0.133	0.083	2.88322e-87
EIF2AK1	2.35933e-91	0.151098	0.208	0.144	4.26685e-87
MOCS2	2.92842e-91	0.171563	0.196	0.135	5.29605e-87
NAALAD2	3.20152e-91	0.119514	0.145	0.092	5.78994e-87
RNF25	3.4015e-91	0.293789	0.114	0.068	6.15161e-87
GNS	4.03033e-91	0.202721	0.123	0.075	7.28884e-87
FSIP2	4.26718e-91	0.482864	0.067	0.033	7.71719e-87
PRKDC	4.2755e-91	0.106185	0.245	0.174	7.73224e-87
ORC4	4.72971e-91	0.145128	0.19	0.129	8.55368e-87
MBOAT7	5.52387e-91	0.216781	0.157	0.102	9.98992e-87
PLS3	6.30679e-91	0.367497	0.112	0.067	1.14058e-86
ZNF384	6.69137e-91	0.147601	0.215	0.15	1.21013e-86
PSME1	6.76857e-91	0.222701	0.126	0.078	1.2241e-86
EBNA1BP2	9.40262e-91	0.256688	0.179	0.121	1.70046e-86
DDRGK1	1.28676e-90	0.147915	0.212	0.148	2.3271e-86
LMAN2	1.28926e-90	0.162893	0.186	0.126	2.33162e-86
CDK20	1.69679e-90	0.220778	0.206	0.144	3.06865e-86
MSL2	1.69966e-90	0.211196	0.171	0.115	3.07384e-86
HIST1H4C	2.13307e-90	0.195086	0.177	0.119	3.85765e-86
CCNK	2.45964e-90	0.141607	0.237	0.169	4.44826e-86
CABIN1	3.84864e-90	0.268482	0.151	0.099	6.96026e-86
HADHA	3.8635e-90	0.135626	0.152	0.099	6.98715e-86
EIF4A3	4.33798e-90	0.11626	0.236	0.167	7.84523e-86
NDUFAF3	6.83687e-90	0.159837	0.265	0.193	1.23645e-85
NEIL2	8.54014e-90	0.296715	0.114	0.068	1.54448e-85
CNIH1	9.06501e-90	0.173662	0.205	0.142	1.63941e-85
TNPO1	1.07085e-89	0.205421	0.138	0.087	1.93664e-85
CLPTM1L	1.18622e-89	0.227886	0.159	0.105	2.14529e-85
PLEKHG5	1.246e-89	0.25427	0.116	0.07	2.25339e-85
COX4I1	1.288e-89	0.153174	0.187	0.128	2.32934e-85
UVRAG	1.59253e-89	0.430743	0.088	0.049	2.88009e-85
LARS	1.66772e-89	0.183836	0.216	0.152	3.01607e-85
TNKS1BP1	1.78098e-89	0.323636	0.11	0.066	3.2209e-85
TMSB15B	2.9875e-89	0.32558	0.091	0.051	5.4029e-85
KCNK3	3.12072e-89	0.438758	0.076	0.039	5.64383e-85
EIF6	4.29153e-89	0.186631	0.184	0.125	7.76124e-85
GALE	6.35525e-89	0.371207	0.078	0.041	1.14935e-84
LMBRD2	6.59291e-89	0.224818	0.164	0.109	1.19233e-84
SRP54	7.27085e-89	-0.610902	0.104	0.149	1.31493e-84
LMBR1	9.73516e-89	0.111687	0.207	0.144	1.7606e-84
POLR2L	1.0115e-88	0.126127	0.225	0.159	1.8293e-84
PRKX	1.20741e-88	0.920705	0.043	0.016	2.18361e-84
BAG5	1.34631e-88	0.198753	0.183	0.125	2.43481e-84
NECAB2	1.34647e-88	0.21937	0.114	0.068	2.4351e-84
PPP1R16A	1.40755e-88	0.290852	0.127	0.08	2.54556e-84
SEC23B	1.51469e-88	0.192912	0.183	0.125	2.73932e-84
PPP6C	1.94612e-88	0.158803	0.201	0.139	3.51955e-84
SCAP	3.06368e-88	0.177633	0.193	0.133	5.54067e-84
ANAPC13	3.81645e-88	0.182299	0.198	0.137	6.90206e-84
SSR1	3.82331e-88	0.328636	0.131	0.083	6.91445e-84
CACNA1H	3.84835e-88	0.117443	0.186	0.126	6.95974e-84
STK40	5.23324e-88	0.239278	0.158	0.104	9.46431e-84
PTS	6.06704e-88	0.149166	0.168	0.112	1.09722e-83
ADIPOR1	6.68151e-88	0.233386	0.167	0.112	1.20835e-83
PRPSAP2	1.14085e-87	0.140268	0.19	0.13	2.06322e-83
STK19	1.54071e-87	0.228581	0.17	0.115	2.78638e-83
SOX3	1.91217e-87	0.813146	0.044	0.018	3.45816e-83
CCNG1	1.94198e-87	0.16645	0.154	0.101	3.51208e-83
LRRC59	2.20871e-87	0.248344	0.175	0.119	3.99445e-83
EIF4E3	2.38984e-87	0.143839	0.177	0.119	4.32203e-83
SEPTIN6	2.44971e-87	0.10479	0.165	0.109	4.43029e-83
CMTM4	2.74545e-87	0.23179	0.121	0.074	4.96514e-83
GNG10	4.11755e-87	0.236204	0.116	0.071	7.4466e-83
WDR75	4.51595e-87	0.220891	0.155	0.102	8.1671e-83
DPH3	4.96623e-87	0.211297	0.15	0.099	8.98143e-83
NUDT16	6.07731e-87	0.280596	0.117	0.072	1.09908e-82
RPN1	6.4135e-87	0.206676	0.147	0.096	1.15988e-82
RNF41	1.05899e-86	0.147442	0.152	0.1	1.91518e-82
DDX42	1.16872e-86	0.127472	0.241	0.174	2.11363e-82
YIPF5	1.35427e-86	0.189412	0.216	0.153	2.44919e-82
LHX2	1.72172e-86	0.711412	0.046	0.019	3.11373e-82
TBC1D15	1.7491e-86	0.221979	0.148	0.096	3.16324e-82
NAT10	1.91284e-86	0.335905	0.108	0.065	3.45937e-82
MDK	2.03796e-86	0.125587	0.149	0.096	3.68564e-82
EIF3B	2.37245e-86	0.148647	0.234	0.168	4.29057e-82
SRPRB	2.65807e-86	-0.65175	0.092	0.134	4.80711e-82
DNAJB9	2.87394e-86	0.20389	0.183	0.126	5.19751e-82
PACS2	3.01684e-86	0.109553	0.167	0.111	5.45596e-82
PPIL1	3.11342e-86	0.100382	0.184	0.125	5.63063e-82
TNFRSF10B	3.22747e-86	0.188299	0.203	0.143	5.83688e-82
FAF2	4.14297e-86	0.22707	0.156	0.103	7.49257e-82
RNF150	4.18979e-86	0.18854	0.114	0.069	7.57724e-82
NIT1	4.94171e-86	0.173371	0.106	0.062	8.93709e-82
TSEN34	5.52374e-86	0.282082	0.089	0.05	9.98968e-82
TPX2	5.84827e-86	0.614519	0.058	0.027	1.05766e-81
DERL2	7.24145e-86	0.260543	0.141	0.091	1.30962e-81
CHN1	7.70769e-86	0.119133	0.129	0.08	1.39394e-81
FNBP1	8.94216e-86	0.141712	0.155	0.102	1.61719e-81
SPON1	1.08495e-85	0.682529	0.056	0.026	1.96213e-81
RAD23A	1.24266e-85	0.20424	0.167	0.113	2.24734e-81
GNL1	1.24535e-85	0.107305	0.162	0.107	2.25222e-81
DAP3	1.53666e-85	0.111918	0.204	0.142	2.77906e-81
MFSD2A	1.74108e-85	0.565016	0.101	0.061	3.14875e-81
TOM1L2	2.31854e-85	0.12969	0.164	0.109	4.19308e-81
CRTAP	2.68734e-85	0.346768	0.08	0.043	4.86006e-81
AAGAB	3.29824e-85	0.17262	0.138	0.088	5.96488e-81
EIF2A	3.41617e-85	0.111093	0.211	0.148	6.17815e-81
AAAS	4.77972e-85	0.148263	0.215	0.152	8.64413e-81
C11orf49	5.87974e-85	0.108295	0.223	0.158	1.06335e-80
WIPI2	6.48656e-85	0.204637	0.155	0.103	1.17309e-80
GOSR2	6.82491e-85	0.105912	0.328	0.247	1.23428e-80
TCEA2	7.57544e-85	0.143895	0.213	0.151	1.37002e-80
BRK1	9.33096e-85	0.368109	0.077	0.041	1.6875e-80
PPP1R11	9.94831e-85	0.109091	0.215	0.151	1.79915e-80
FBXO41	1.61858e-84	0.234814	0.126	0.079	2.9272e-80
GNPTAB	1.67162e-84	0.100517	0.171	0.115	3.02312e-80
DDIT3	1.78434e-84	0.318089	0.18	0.125	3.22699e-80
SLC3A2	1.94442e-84	0.107456	0.356	0.272	3.51648e-80
VSTM2L	2.22785e-84	0.125217	0.122	0.076	4.02907e-80
PPIE	2.43117e-84	0.249491	0.128	0.081	4.39678e-80
CSNK2B	2.47385e-84	0.147074	0.134	0.085	4.47395e-80
NLRP2	2.65609e-84	-1.62537	0.012	0.03	4.80354e-80
RABAC1	2.92323e-84	0.104677	0.347	0.263	5.28667e-80
GPN3	3.45953e-84	0.337353	0.079	0.042	6.25656e-80
APAF1	3.70504e-84	0.287797	0.096	0.056	6.70057e-80
NRBP2	3.83958e-84	0.125539	0.148	0.097	6.94388e-80
GALK2	7.68862e-84	0.305425	0.1	0.059	1.39049e-79
UBTD2	1.4809e-83	0.164226	0.139	0.089	2.6782e-79
EPB41	1.51845e-83	0.124001	0.179	0.122	2.74611e-79
SIRT3	1.52043e-83	0.284671	0.108	0.066	2.7497e-79
ZSWIM7	1.73139e-83	0.31818	0.092	0.053	3.13123e-79
ATP5MC3	1.81177e-83	0.105567	0.18	0.122	3.27658e-79
DNAJC3	2.23577e-83	0.374571	0.131	0.085	4.04339e-79
GREB1	2.47188e-83	0.17661	0.101	0.06	4.47039e-79
MRS2	2.71957e-83	0.175987	0.154	0.102	4.91835e-79
MAP9	3.09134e-83	0.239038	0.135	0.087	5.59069e-79
GALNT9	3.24744e-83	0.668749	0.042	0.017	5.873e-79
XAB2	3.43708e-83	0.187245	0.166	0.113	6.21595e-79
ZNF121	3.7936e-83	0.103342	0.15	0.098	6.86073e-79
MKRN2	3.80709e-83	0.281551	0.137	0.089	6.88512e-79
TIMP2	5.41483e-83	-0.686095	0.106	0.149	9.79271e-79
MED14	7.54192e-83	0.247902	0.124	0.078	1.36396e-78
SEC24D	8.35129e-83	0.5812	0.091	0.053	1.51033e-78
MUC20	9.96794e-83	0.500381	0.055	0.025	1.8027e-78
LIG1	1.02e-82	0.260719	0.123	0.078	1.84467e-78
PTPN23	1.31853e-82	0.170584	0.169	0.114	2.38457e-78
REEP5	1.41408e-82	0.135494	0.216	0.154	2.55737e-78
CYC1	1.82117e-82	0.110312	0.223	0.159	3.29359e-78
GID8	2.23362e-82	0.140491	0.146	0.096	4.0395e-78
GRAMD4	2.23536e-82	0.203115	0.091	0.052	4.04265e-78
CPD	2.30614e-82	0.122813	0.14	0.09	4.17066e-78
PAXX	2.91967e-82	0.116415	0.143	0.093	5.28021e-78
TTC17	3.38119e-82	0.123929	0.187	0.13	6.11489e-78
PLPPR1	3.55669e-82	0.122458	0.138	0.089	6.43227e-78
MYBBP1A	4.2641e-82	0.268823	0.149	0.1	7.71162e-78
UAP1	4.52876e-82	0.213685	0.161	0.108	8.19027e-78
SEPHS1	5.89896e-82	0.122454	0.174	0.118	1.06683e-77
NUP54	6.38035e-82	0.141393	0.159	0.107	1.15389e-77
GPRC5B	7.29889e-82	0.195924	0.104	0.062	1.32e-77
CLCN6	8.08782e-82	0.178788	0.213	0.153	1.46268e-77
NIPA1	9.95396e-82	0.271453	0.125	0.08	1.80017e-77
NUDCD2	1.03686e-81	0.193146	0.165	0.112	1.87515e-77
DCTD	1.0537e-81	0.325838	0.091	0.052	1.90561e-77
CST3	1.14351e-81	0.24261	0.124	0.079	2.06804e-77
RPP21	1.23514e-81	0.141749	0.193	0.135	2.23376e-77
ESYT2	1.28466e-81	0.202776	0.143	0.094	2.32331e-77
HNRNPK	1.34859e-81	-0.916315	0.125	0.166	2.43893e-77
NKX6-2	1.82358e-81	0.843641	0.029	0.008	3.29794e-77
PPME1	2.26665e-81	0.106107	0.222	0.158	4.09924e-77
PPP2R5C	2.61363e-81	0.205404	0.133	0.086	4.72675e-77
PARL	3.54545e-81	0.290166	0.113	0.07	6.41195e-77
VEZT	3.76518e-81	0.100865	0.216	0.154	6.80933e-77
DPY19L3	3.97909e-81	0.203148	0.142	0.093	7.19619e-77
GGNBP2	4.25614e-81	0.126951	0.131	0.083	7.69724e-77
TAF6	5.06672e-81	0.108653	0.156	0.104	9.16316e-77
VDAC2	5.09151e-81	0.11071	0.199	0.14	9.208e-77
PES1	5.53426e-81	0.270293	0.156	0.105	1.00087e-76
ADAMTS13	7.68918e-81	0.226639	0.134	0.087	1.39059e-76
ZZEF1	7.7835e-81	0.196003	0.146	0.097	1.40765e-76
RADX	7.91025e-81	0.139527	0.146	0.096	1.43057e-76
CDK13	8.93597e-81	0.140018	0.166	0.113	1.61607e-76
ZBTB5	8.96785e-81	0.124214	0.16	0.107	1.62184e-76
PPP2R2C	1.18944e-80	0.10556	0.163	0.11	2.15111e-76
UQCR11	1.26901e-80	0.150958	0.185	0.129	2.29501e-76
ZNF768	1.38633e-80	0.157604	0.173	0.119	2.50719e-76
FOXK2	1.5993e-80	0.13012	0.142	0.093	2.89233e-76
SSU72	1.78844e-80	0.175175	0.149	0.099	3.23439e-76
NOC4L	1.86948e-80	0.317225	0.129	0.084	3.38095e-76
HSPA5	2.15333e-80	0.210889	0.176	0.122	3.8943e-76
MAN2A1	2.39897e-80	0.421929	0.09	0.052	4.33853e-76
SLC25A46	2.40067e-80	0.122312	0.175	0.12	4.34162e-76
POLR2E	2.68327e-80	0.12456	0.191	0.134	4.8527e-76
ZNF559	2.98248e-80	0.208453	0.146	0.097	5.39381e-76
TMED9	4.35411e-80	0.236835	0.179	0.125	7.87441e-76
FOXJ3	4.41902e-80	0.220997	0.143	0.094	7.9918e-76
AHCYL1	6.02273e-80	0.108645	0.199	0.14	1.08921e-75
ZSWIM8	6.74174e-80	0.138042	0.251	0.184	1.21924e-75
TNK2	1.43285e-79	0.115677	0.207	0.147	2.59131e-75
BBS7	1.50098e-79	0.249371	0.119	0.076	2.71452e-75
COX14	1.51588e-79	0.180896	0.215	0.155	2.74146e-75
CCT8	2.14354e-79	0.140998	0.163	0.11	3.8766e-75
LAMTOR2	2.24082e-79	0.189631	0.142	0.094	4.05252e-75
DAP	3.10313e-79	0.332293	0.109	0.067	5.612e-75
CLPP	3.15221e-79	0.125366	0.219	0.157	5.70076e-75
SEC63	4.22784e-79	0.111398	0.263	0.194	7.64606e-75
GOLIM4	4.55579e-79	0.380078	0.073	0.04	8.23914e-75
TOPBP1	4.65562e-79	0.219969	0.139	0.092	8.4197e-75
SLBP	5.15674e-79	0.146853	0.169	0.116	9.32597e-75
TMEM97	8.08115e-79	0.190635	0.117	0.074	1.46148e-74
NANS	9.23559e-79	0.440771	0.098	0.059	1.67026e-74
TOLLIP	9.33089e-79	0.254574	0.125	0.081	1.68749e-74
EXOC2	9.88139e-79	0.155571	0.138	0.09	1.78705e-74
TRA2B	1.01942e-78	0.125857	0.196	0.138	1.84362e-74
AP2B1	1.61799e-78	0.100102	0.181	0.125	2.92614e-74
ICA1L	1.61903e-78	0.163384	0.124	0.079	2.92802e-74
PPFIA4	1.78275e-78	0.43809	0.076	0.042	3.22411e-74
RSL24D1	1.81252e-78	0.289999	0.087	0.05	3.27795e-74
AKR7A2	2.81854e-78	0.301231	0.095	0.057	5.09733e-74
SDF4	2.91492e-78	0.123142	0.215	0.154	5.27163e-74
INSYN1	2.96549e-78	0.220944	0.128	0.082	5.36308e-74
COTL1	3.13727e-78	0.117044	0.138	0.09	5.67376e-74
CKS2	3.30888e-78	0.458998	0.07	0.037	5.9841e-74
NDUFV3	3.44991e-78	0.147646	0.232	0.17	6.23916e-74
CCDC85C	3.87416e-78	0.202698	0.104	0.064	7.00643e-74
DARS	3.90567e-78	0.109513	0.212	0.152	7.0634e-74
TAF15	4.13851e-78	0.113092	0.153	0.102	7.4845e-74
NCDN	8.35397e-78	0.124705	0.178	0.123	1.51082e-73
GOLGA1	1.1593e-77	0.344773	0.079	0.044	2.0966e-73
AKR1A1	1.24429e-77	0.127373	0.23	0.167	2.25029e-73
MSH6	1.33978e-77	0.153681	0.164	0.112	2.423e-73
SMARCA2	1.41007e-77	0.242918	0.112	0.069	2.55011e-73
ARMCX2	1.43164e-77	0.153335	0.13	0.084	2.58912e-73
RHNO1	1.53637e-77	0.10333	0.12	0.076	2.77853e-73
TMEM189	1.65151e-77	0.247602	0.106	0.065	2.98676e-73
FAM229B	1.87873e-77	0.154172	0.149	0.1	3.39768e-73
METRN	1.93729e-77	0.17627	0.165	0.113	3.50358e-73
CTNNA1	1.98279e-77	0.141095	0.135	0.088	3.58587e-73
WDR18	2.22978e-77	0.20256	0.152	0.102	4.03256e-73
ARFIP2	2.24502e-77	0.141387	0.172	0.119	4.06013e-73
FUBP3	2.45471e-77	0.190208	0.13	0.084	4.43934e-73
HNRNPF	2.50798e-77	0.14841	0.197	0.141	4.53567e-73
ATP13A1	2.65325e-77	0.159549	0.171	0.118	4.7984e-73
C17orf49	2.69727e-77	0.14047	0.146	0.097	4.87801e-73
DNAJB11	2.74391e-77	0.158517	0.192	0.136	4.96237e-73
GCN1	3.09811e-77	0.166883	0.119	0.075	5.60293e-73
NUP133	4.80692e-77	0.102193	0.176	0.122	8.69331e-73
TMEM65	5.00525e-77	0.153241	0.138	0.091	9.052e-73
FAM120B	5.18898e-77	0.16845	0.132	0.086	9.38426e-73
PSMC4	5.45636e-77	0.103092	0.266	0.197	9.86783e-73
TMEM39A	5.59716e-77	0.304305	0.112	0.07	1.01225e-72
GBE1	5.75144e-77	0.715923	0.046	0.02	1.04015e-72
C1orf198	5.87676e-77	0.221749	0.119	0.076	1.06281e-72
TAB2	6.16992e-77	0.110119	0.167	0.114	1.11583e-72
FAM234A	6.56869e-77	0.199415	0.129	0.084	1.18795e-72
MVD	7.05176e-77	0.134324	0.143	0.094	1.27531e-72
DDX50	7.66014e-77	0.259722	0.103	0.063	1.38534e-72
METTL15	7.86073e-77	0.238132	0.113	0.071	1.42161e-72
PAPOLA	8.47169e-77	0.139693	0.131	0.085	1.5321e-72
MED25	9.44385e-77	0.112218	0.193	0.136	1.70792e-72
NABP2	1.04643e-76	0.182996	0.198	0.142	1.89247e-72
RARS2	1.08991e-76	0.139985	0.198	0.141	1.9711e-72
FMC1	1.09572e-76	0.36071	0.075	0.042	1.9816e-72
IARS	1.2805e-76	0.25014	0.162	0.112	2.31579e-72
MPI	1.32087e-76	0.304499	0.102	0.063	2.38879e-72
SND1	1.4726e-76	0.137787	0.221	0.16	2.66319e-72
MALT1	1.77276e-76	0.310642	0.089	0.052	3.20604e-72
BCAR1	2.14944e-76	0.124392	0.157	0.107	3.88726e-72
P3H4	3.15346e-76	0.352902	0.109	0.068	5.70304e-72
ADRM1	3.25626e-76	0.107985	0.208	0.149	5.88895e-72
PIGF	5.12534e-76	0.170492	0.148	0.099	9.26918e-72
XRCC6	6.04612e-76	0.22325	0.138	0.092	1.09344e-71
PARN	6.86696e-76	0.223379	0.122	0.079	1.24189e-71
DHCR24	6.9826e-76	0.188248	0.11	0.069	1.2628e-71
TPM4	9.26913e-76	0.148133	0.132	0.086	1.67632e-71
CPNE3	9.67985e-76	0.114292	0.179	0.125	1.7506e-71
ATRAID	1.3301e-75	0.177413	0.177	0.124	2.40548e-71
OARD1	1.48277e-75	0.145538	0.156	0.106	2.68159e-71
OSBP	1.8307e-75	0.147942	0.198	0.141	3.31083e-71
NOP53	2.11892e-75	0.202802	0.1	0.061	3.83207e-71
SNX30	2.19976e-75	0.121087	0.126	0.082	3.97826e-71
TPD52	2.38321e-75	0.824345	0.039	0.016	4.31004e-71
ZNHIT1	3.0207e-75	0.119557	0.198	0.141	5.46294e-71
ACD	3.14997e-75	0.213821	0.136	0.09	5.69672e-71
SURF4	4.84179e-75	0.179576	0.221	0.161	8.75638e-71
RTRAF	5.80087e-75	0.179318	0.15	0.101	1.04909e-70
RND3	5.85819e-75	0.131343	0.14	0.093	1.05945e-70
DYNC2LI1	5.93398e-75	0.225332	0.102	0.062	1.07316e-70
RLIM	6.89753e-75	0.259126	0.087	0.051	1.24742e-70
CACNA1B	7.64727e-75	0.126403	0.188	0.133	1.38301e-70
GBF1	7.82137e-75	0.132681	0.172	0.119	1.4145e-70
DCUN1D5	8.58185e-75	0.154143	0.172	0.12	1.55203e-70
GPRASP1	9.03147e-75	0.11062	0.148	0.099	1.63334e-70
CLGN	9.92544e-75	0.405778	0.094	0.057	1.79502e-70
YARS	1.1051e-74	0.362051	0.122	0.079	1.99858e-70
REPIN1	1.47679e-74	0.178375	0.129	0.084	2.67078e-70
HIST1H1C	1.49152e-74	0.159387	0.248	0.184	2.69741e-70
GNB5	1.63224e-74	0.150541	0.125	0.08	2.9519e-70
TRAPPC9	1.66764e-74	0.105311	0.191	0.135	3.01593e-70
AHDC1	1.7841e-74	0.109189	0.177	0.123	3.22655e-70
PIGQ	2.05151e-74	0.105998	0.164	0.112	3.71016e-70
LTA4H	2.30192e-74	0.160137	0.146	0.098	4.16303e-70
RALGDS	2.4327e-74	0.157153	0.128	0.083	4.39954e-70
DUSP15	2.74462e-74	0.341311	0.078	0.045	4.96365e-70
FAM8A1	3.03323e-74	0.26148	0.117	0.075	5.48559e-70
GNPAT	3.16717e-74	0.110037	0.12	0.076	5.72783e-70
SMIM14	3.16893e-74	0.141517	0.171	0.119	5.731e-70
CENPM	3.92512e-74	0.33332	0.093	0.056	7.09857e-70
GTF2A2	4.73389e-74	0.138719	0.176	0.123	8.56123e-70
SYN2	4.99265e-74	0.373216	0.068	0.037	9.02921e-70
EFTUD2	5.26174e-74	0.152962	0.151	0.102	9.51585e-70
LMAN1	6.51951e-74	0.141152	0.164	0.113	1.17905e-69
ARL4D	6.85461e-74	-0.968436	0.036	0.063	1.23966e-69
ERP44	7.40228e-74	0.194381	0.136	0.09	1.3387e-69
RUVBL2	7.70529e-74	0.135289	0.166	0.115	1.3935e-69
YIF1B	7.81238e-74	0.145761	0.187	0.133	1.41287e-69
PAICS	7.92607e-74	0.313967	0.093	0.056	1.43343e-69
ISCU	9.24052e-74	0.134703	0.171	0.12	1.67115e-69
SGTB	1.00534e-73	0.305655	0.087	0.051	1.81816e-69
DCUN1D4	1.27783e-73	0.147202	0.148	0.1	2.31096e-69
CEBPZ	1.56998e-73	0.178326	0.163	0.113	2.83932e-69
SCAND1	1.66415e-73	0.159961	0.151	0.102	3.00962e-69
CHAC1	1.83991e-73	0.791085	0.04	0.016	3.32748e-69
WDR61	2.16635e-73	0.192376	0.151	0.103	3.91784e-69
USP10	2.24502e-73	0.133166	0.169	0.118	4.06011e-69
TATDN3	2.38089e-73	0.202231	0.122	0.079	4.30583e-69
CNPY3	2.66295e-73	0.230527	0.127	0.084	4.81595e-69
DACH1	2.93024e-73	0.450618	0.053	0.026	5.29934e-69
KIAA1958	3.35334e-73	0.107816	0.158	0.108	6.06451e-69
SERGEF	4.84998e-73	0.146519	0.157	0.108	8.77119e-69
RNF103	5.73602e-73	0.102607	0.126	0.082	1.03736e-68
SYT4	5.81999e-73	0.176336	0.125	0.082	1.05255e-68
OXNAD1	6.04589e-73	0.298346	0.126	0.083	1.0934e-68
DALRD3	6.62899e-73	0.248628	0.122	0.08	1.19885e-68
EPHX1	7.15492e-73	0.17758	0.096	0.058	1.29397e-68
RARS	1.01509e-72	0.133362	0.17	0.119	1.8358e-68
MXI1	1.34149e-72	0.151202	0.122	0.079	2.42609e-68
CDRT4	1.43395e-72	0.214093	0.11	0.069	2.5933e-68
HSPA9	1.47108e-72	0.191066	0.185	0.132	2.66045e-68
RNF31	1.59282e-72	0.192687	0.125	0.081	2.88062e-68
PSMC2	1.64305e-72	0.1285	0.172	0.12	2.97145e-68
TRAPPC1	1.9302e-72	0.122681	0.165	0.114	3.49076e-68
EIF4E	1.99606e-72	0.124761	0.158	0.109	3.60988e-68
CYTH1	2.2798e-72	0.145568	0.123	0.08	4.12301e-68
RAMAC	2.78338e-72	0.241946	0.093	0.056	5.03375e-68
PINK1	3.61901e-72	0.100268	0.167	0.116	6.54499e-68
C1orf174	4.16016e-72	0.313077	0.1	0.062	7.52365e-68
MMUT	4.78599e-72	0.184288	0.176	0.125	8.65545e-68
TBL2	5.40913e-72	0.25439	0.119	0.078	9.78241e-68
YIPF2	5.44332e-72	0.286491	0.143	0.098	9.84424e-68
DENND6A	7.34439e-72	0.175124	0.101	0.063	1.32823e-67
SLC35E1	7.59893e-72	0.201762	0.185	0.133	1.37427e-67
TNNI1	8.95219e-72	1.19275	0.026	0.008	1.619e-67
CCPG1	9.11493e-72	0.154262	0.206	0.15	1.64844e-67
RHOC	1.02089e-71	0.444814	0.069	0.038	1.84628e-67
MTHFD2	1.15479e-71	0.324644	0.113	0.073	2.08843e-67
USP36	1.21212e-71	0.293729	0.126	0.083	2.19212e-67
FLNC	1.32744e-71	0.955133	0.036	0.014	2.40068e-67
C9orf72	1.39987e-71	0.119076	0.175	0.123	2.53167e-67
LARGE1	1.49388e-71	-1.3366	0.025	0.047	2.70168e-67
MST1	1.6028e-71	0.238243	0.095	0.058	2.89866e-67
PSMA4	1.74823e-71	0.133607	0.161	0.111	3.16167e-67
DNAJA3	1.78641e-71	0.207526	0.142	0.096	3.23072e-67
ZNF160	2.19095e-71	0.220894	0.108	0.068	3.96234e-67
FNDC5	2.34231e-71	0.304995	0.062	0.033	4.23608e-67
APIP	3.14865e-71	0.229235	0.115	0.074	5.69434e-67
AGBL4	3.74282e-71	0.825946	0.043	0.019	6.76889e-67
ATP2B4	4.64475e-71	0.238984	0.131	0.087	8.40003e-67
PAIP2	4.81257e-71	0.132745	0.148	0.1	8.70353e-67
SORBS3	6.5719e-71	0.452	0.075	0.042	1.18853e-66
VEGFA	9.11776e-71	0.116636	0.391	0.308	1.64895e-66
GUK1	1.03017e-70	0.105967	0.272	0.206	1.86306e-66
PITPNM1	1.16255e-70	0.120977	0.157	0.109	2.10248e-66
CISD2	1.19397e-70	0.152882	0.159	0.11	2.1593e-66
SF3A3	1.26066e-70	0.162397	0.164	0.115	2.2799e-66
TCEAL9	2.28384e-70	0.15571	0.139	0.093	4.13032e-66
PPP2R2A	2.76046e-70	0.111905	0.17	0.119	4.99229e-66
RIC8A	2.83067e-70	0.168566	0.162	0.113	5.11926e-66
FAF1	2.84684e-70	0.138125	0.158	0.109	5.14851e-66
BPHL	3.17841e-70	0.18894	0.114	0.073	5.74816e-66
CCNT1	3.42192e-70	0.111512	0.144	0.098	6.18853e-66
PFKFB3	3.66591e-70	0.28602	0.155	0.108	6.6298e-66
TOX2	4.37326e-70	0.35244	0.076	0.044	7.90903e-66
TCTN1	4.60142e-70	0.267324	0.101	0.064	8.32168e-66
PRPF31	5.65642e-70	0.106687	0.161	0.112	1.02296e-65
DMAP1	6.55615e-70	0.117613	0.147	0.1	1.18568e-65
TBL1X	7.30008e-70	0.656765	0.054	0.027	1.32022e-65
CDK14	7.65871e-70	0.166695	0.123	0.081	1.38508e-65
CLINT1	9.03901e-70	0.182434	0.151	0.104	1.6347e-65
NR2F6	9.59514e-70	0.254037	0.107	0.068	1.73528e-65
RIMBP2	1.02095e-69	0.29845	0.078	0.045	1.84639e-65
SCRN3	1.09362e-69	0.129624	0.149	0.102	1.97782e-65
PAQR7	1.25439e-69	0.378763	0.075	0.043	2.26856e-65
RNF114	1.42533e-69	0.175433	0.125	0.083	2.57771e-65
SMIM10L1	1.42807e-69	0.173595	0.138	0.093	2.58267e-65
AP4B1	1.6206e-69	0.177269	0.138	0.093	2.93086e-65
QPRT	2.14651e-69	0.492808	0.067	0.037	3.88196e-65
MSN	2.19651e-69	0.511201	0.051	0.025	3.97239e-65
CNTNAP2	2.35144e-69	-0.105676	0.253	0.184	4.25257e-65
GTF3C1	2.56437e-69	0.166462	0.135	0.09	4.63766e-65
SAMM50	3.90946e-69	0.214306	0.137	0.092	7.07027e-65
FBXO21	4.42561e-69	0.107092	0.114	0.073	8.00372e-65
ARL3	4.77311e-69	0.108807	0.183	0.131	8.63218e-65
GSR	4.85361e-69	0.137718	0.12	0.079	8.77776e-65
ZNF83	5.10593e-69	0.242865	0.092	0.056	9.23407e-65
SLC31A1	5.3039e-69	0.31986	0.125	0.083	9.59211e-65
RMND1	5.78032e-69	0.142827	0.124	0.082	1.04537e-64
LMF2	6.34473e-69	0.200656	0.152	0.105	1.14744e-64
MMGT1	6.715e-69	0.135022	0.119	0.077	1.21441e-64
PCBD1	7.06866e-69	0.388002	0.064	0.035	1.27837e-64
RINT1	1.11851e-68	0.200502	0.121	0.08	2.02282e-64
EMC3	1.13009e-68	0.12319	0.152	0.105	2.04377e-64
NRG1	1.13373e-68	0.255231	0.089	0.054	2.05036e-64
NMD3	1.16102e-68	0.136689	0.148	0.101	2.09971e-64
RABGGTB	1.2022e-68	0.117936	0.205	0.149	2.17417e-64
FAM228B	1.23523e-68	0.31769	0.08	0.047	2.23391e-64
CAPN5	1.33198e-68	0.169483	0.087	0.052	2.40889e-64
RHOQ	1.45899e-68	0.211335	0.113	0.073	2.63859e-64
UROS	1.52276e-68	0.179971	0.152	0.105	2.75392e-64
ANO10	1.75248e-68	0.1757	0.131	0.088	3.16935e-64
HSPA4	1.99587e-68	0.150142	0.139	0.095	3.60953e-64
SMNDC1	2.24436e-68	0.130646	0.159	0.111	4.05892e-64
POLR2C	2.45925e-68	0.250791	0.134	0.091	4.44755e-64
CITED4	3.38496e-68	0.483106	0.053	0.027	6.1217e-64
RNF20	3.94211e-68	0.128018	0.109	0.069	7.1293e-64
SMAD5	4.19652e-68	0.10433	0.168	0.119	7.5894e-64
OSTM1	4.32019e-68	0.199065	0.135	0.091	7.81307e-64
TSTA3	5.04486e-68	0.301046	0.106	0.068	9.12364e-64
MVK	5.69574e-68	0.163435	0.141	0.096	1.03007e-63
PPIB	6.63551e-68	0.17356	0.137	0.093	1.20003e-63
PABPC5	7.38735e-68	0.577741	0.04	0.017	1.336e-63
PRTG	7.52072e-68	0.542476	0.061	0.033	1.36012e-63
UNK	1.02288e-67	0.110466	0.15	0.103	1.84987e-63
CRBN	1.07512e-67	0.143945	0.135	0.091	1.94436e-63
BUB3	1.20099e-67	0.12753	0.162	0.114	2.17199e-63
MFSD14B	1.28951e-67	0.311333	0.104	0.067	2.33208e-63
HAT1	1.39188e-67	0.239704	0.106	0.068	2.51721e-63
SIVA1	1.46485e-67	0.142937	0.194	0.14	2.64918e-63
FAM177A1	1.65264e-67	0.23193	0.134	0.091	2.9888e-63
CYB5R1	2.05251e-67	0.221213	0.1	0.063	3.71196e-63
SLC26A11	2.0687e-67	0.216514	0.118	0.078	3.74125e-63
RBM41	2.4613e-67	0.144281	0.093	0.057	4.45127e-63
KDM4B	2.6371e-67	-0.717081	0.062	0.094	4.76919e-63
CHKA	2.84369e-67	0.221626	0.138	0.095	5.14281e-63
FAM216A	3.12584e-67	0.150973	0.108	0.069	5.65307e-63
MALSU1	3.19676e-67	0.130085	0.144	0.099	5.78133e-63
TM2D1	3.68246e-67	0.135658	0.158	0.11	6.65973e-63
BCOR	3.77881e-67	0.126754	0.127	0.085	6.83398e-63
LGMN	4.0756e-67	0.226353	0.119	0.078	7.37072e-63
PPP6R1	4.57573e-67	0.108577	0.171	0.122	8.27521e-63
CASKIN1	5.51602e-67	0.147026	0.131	0.088	9.97573e-63
ZNRD2	6.09648e-67	0.16289	0.163	0.115	1.10255e-62
WDTC1	7.29176e-67	0.15518	0.162	0.114	1.31872e-62
TSSC4	7.46103e-67	0.210591	0.124	0.083	1.34933e-62
NDUFA6	7.60501e-67	0.200263	0.097	0.061	1.37537e-62
SLC16A1	8.04296e-67	0.228963	0.132	0.089	1.45457e-62
DNPEP	8.82088e-67	0.289886	0.082	0.049	1.59526e-62
C6orf62	8.91184e-67	0.136095	0.183	0.132	1.61171e-62
MED29	9.10125e-67	0.101325	0.189	0.136	1.64596e-62
YY1AP1	9.71664e-67	0.111099	0.147	0.101	1.75725e-62
ZKSCAN7	1.05598e-66	0.187102	0.099	0.062	1.90974e-62
SEL1L	1.21143e-66	0.106296	0.18	0.129	2.19087e-62
ALG3	1.30606e-66	0.280354	0.135	0.093	2.36201e-62
DNTTIP2	1.48646e-66	0.100095	0.152	0.105	2.68826e-62
C6orf226	1.51389e-66	0.234092	0.108	0.07	2.73786e-62
SLC35F6	1.52149e-66	0.279836	0.128	0.087	2.75162e-62
FAM160A2	1.69694e-66	0.176605	0.127	0.085	3.06892e-62
COQ5	1.76483e-66	0.123497	0.146	0.1	3.19169e-62
EFNA5	2.00228e-66	0.148483	0.135	0.091	3.62112e-62
CHEK1	2.16307e-66	0.296052	0.071	0.04	3.91191e-62
PLAA	2.32912e-66	0.123099	0.147	0.102	4.21221e-62
TET1	2.38991e-66	0.105129	0.148	0.102	4.32215e-62
DYRK4	2.60386e-66	0.379398	0.071	0.04	4.70908e-62
SLC25A24	2.60921e-66	0.288147	0.058	0.031	4.71876e-62
EPHB3	2.66743e-66	0.130104	0.153	0.106	4.82405e-62
ATL2	2.73114e-66	0.154244	0.145	0.1	4.93927e-62
SMU1	3.01938e-66	0.109061	0.15	0.104	5.46054e-62
NUP43	3.03769e-66	0.209544	0.13	0.088	5.49366e-62
ADSL	3.12597e-66	0.180986	0.151	0.106	5.65333e-62
C11orf24	3.23314e-66	0.248105	0.11	0.072	5.84713e-62
DRAM2	3.42129e-66	0.112508	0.119	0.078	6.1874e-62
MAEA	3.43253e-66	0.191399	0.12	0.079	6.20773e-62
ENY2	3.85978e-66	0.123224	0.191	0.138	6.98041e-62
SMIM26	4.25183e-66	0.135752	0.146	0.101	7.68943e-62
DNHD1	5.7511e-66	0.347699	0.095	0.06	1.04009e-61
SHB	7.17843e-66	0.249103	0.11	0.072	1.29822e-61
CPXM1	7.44978e-66	0.295951	0.072	0.042	1.34729e-61
TTC8	7.60038e-66	0.104084	0.143	0.098	1.37453e-61
ATP5MD	9.97779e-66	0.1891	0.1	0.063	1.80448e-61
SSR3	1.13585e-65	0.149775	0.14	0.096	2.05418e-61
CTDSPL2	1.13931e-65	0.148235	0.118	0.077	2.06044e-61
POLD2	1.66241e-65	0.130546	0.154	0.108	3.00647e-61
BMP7	1.72469e-65	0.360363	0.094	0.059	3.1191e-61
DAPK3	1.74291e-65	0.134982	0.163	0.115	3.15204e-61
NPC2	2.01547e-65	0.243273	0.108	0.07	3.64497e-61
BBS4	2.30486e-65	0.16349	0.137	0.094	4.16834e-61
GPBP1L1	2.43821e-65	0.178708	0.117	0.078	4.40951e-61
TIMM10B	2.6241e-65	0.180429	0.165	0.118	4.74568e-61
RMDN3	2.6487e-65	0.17547	0.156	0.11	4.79017e-61
RCC1L	3.20076e-65	0.124102	0.093	0.057	5.78858e-61
PLOD2	4.31711e-65	0.387852	0.081	0.049	7.80749e-61
STARD7	4.35873e-65	0.144273	0.118	0.078	7.88277e-61
PRPS1	4.64425e-65	0.10546	0.125	0.083	8.39912e-61
LYRM1	5.03862e-65	0.231522	0.091	0.056	9.11235e-61
ORC3	5.25883e-65	0.176056	0.149	0.104	9.51059e-61
RRBP1	8.98251e-65	0.584959	0.071	0.042	1.62449e-60
RNASEH1	1.12816e-64	0.138344	0.118	0.078	2.04028e-60
PSMA3	1.27234e-64	0.244125	0.106	0.069	2.30103e-60
ATXN2L	2.06125e-64	0.206099	0.131	0.09	3.72777e-60
CCDC167	2.16258e-64	0.116812	0.143	0.099	3.91103e-60
RAB22A	2.34745e-64	0.156296	0.114	0.075	4.24537e-60
SRSF4	2.52545e-64	-0.651184	0.081	0.115	4.56727e-60
PLP1	2.83082e-64	0.874295	0.027	0.01	5.11954e-60
TRMT112	2.93312e-64	0.151273	0.198	0.146	5.30455e-60
ALAD	3.44714e-64	0.144482	0.097	0.061	6.23416e-60
EPHA8	4.13714e-64	0.396175	0.048	0.023	7.48202e-60
FAM126A	4.32803e-64	0.234151	0.112	0.074	7.82724e-60
SLC25A32	4.41747e-64	0.266578	0.122	0.082	7.989e-60
ZCCHC7	4.48714e-64	0.133732	0.17	0.121	8.11499e-60
CLTC	5.73866e-64	0.11765	0.186	0.135	1.03784e-59
FAM136A	6.08844e-64	0.245818	0.087	0.054	1.10109e-59
B9D1	9.11413e-64	0.108641	0.149	0.103	1.64829e-59
ABHD10	1.00686e-63	0.124531	0.135	0.092	1.8209e-59
ST8SIA4	1.09797e-63	-0.56581	0.093	0.129	1.98568e-59
BLOC1S6	1.21581e-63	0.156191	0.105	0.067	2.1988e-59
GOT1	1.23217e-63	0.253029	0.074	0.043	2.22837e-59
FBXL15	1.4258e-63	0.266567	0.087	0.054	2.57856e-59
ZFYVE27	1.53404e-63	0.134792	0.136	0.094	2.77431e-59
ZFX	1.74682e-63	0.433634	0.05	0.026	3.15913e-59
GALC	2.05395e-63	0.223717	0.085	0.052	3.71457e-59
TMEM120B	2.08849e-63	0.351814	0.093	0.059	3.77704e-59
SEC13	2.17247e-63	0.113609	0.303	0.235	3.92891e-59
TUBE1	2.25391e-63	0.18761	0.124	0.084	4.0762e-59
TSPYL2	2.25804e-63	0.106297	0.159	0.113	4.08367e-59
CDH23	2.40648e-63	0.292269	0.05	0.025	4.35212e-59
ZFP36L1	2.45028e-63	0.240417	0.123	0.084	4.43133e-59
CHCHD7	3.78548e-63	0.241392	0.081	0.049	6.84604e-59
SLC1A4	4.11168e-63	0.131653	0.149	0.104	7.43598e-59
TPRG1L	4.46353e-63	0.263138	0.106	0.069	8.07229e-59
GPATCH2	4.52217e-63	0.169491	0.079	0.047	8.17834e-59
ZNF322	4.58888e-63	0.165348	0.131	0.089	8.29899e-59
ST13	5.01939e-63	0.221597	0.099	0.063	9.07756e-59
SPOCK1	5.23403e-63	0.143253	0.107	0.069	9.46574e-59
SELENOM	5.47351e-63	0.35296	0.085	0.052	9.89885e-59
KISS1R	5.68173e-63	0.627422	0.049	0.025	1.02754e-58
TMEM179	6.3123e-63	0.152476	0.11	0.072	1.14158e-58
SLC1A6	6.45781e-63	0.250787	0.085	0.052	1.16789e-58
SCNM1	6.65738e-63	0.174735	0.139	0.096	1.20399e-58
PTPRU	7.06759e-63	0.332066	0.074	0.044	1.27817e-58
TMEM43	7.213e-63	0.196842	0.117	0.078	1.30447e-58
AKIP1	1.0157e-62	0.101907	0.131	0.09	1.8369e-58
KHDRBS1	1.46908e-62	-0.60328	0.088	0.123	2.65683e-58
HDAC3	1.7174e-62	0.18871	0.113	0.075	3.10591e-58
PRDM4	1.80036e-62	0.118935	0.146	0.102	3.25595e-58
HACD2	1.9349e-62	0.279499	0.064	0.036	3.49927e-58
PYCR2	1.96283e-62	0.139619	0.176	0.127	3.54978e-58
DPM1	2.35613e-62	0.100996	0.169	0.121	4.26106e-58
WDR55	2.97551e-62	0.252761	0.108	0.071	5.3812e-58
DHRS11	3.1517e-62	0.288808	0.074	0.043	5.69985e-58
GZF1	3.36891e-62	0.235691	0.107	0.071	6.09268e-58
BCL7C	3.65434e-62	0.114956	0.109	0.072	6.60887e-58
CAPN7	3.75708e-62	0.114413	0.165	0.118	6.79467e-58
DNAJC1	4.29865e-62	0.211059	0.094	0.06	7.77411e-58
MAN2A2	4.68378e-62	0.121276	0.122	0.082	8.47062e-58
ACP2	5.27607e-62	0.114837	0.121	0.081	9.54177e-58
GPR108	6.65699e-62	0.471723	0.054	0.028	1.20392e-57
SPINDOC	6.70072e-62	0.146669	0.105	0.068	1.21183e-57
TOMM22	9.1212e-62	0.104523	0.131	0.09	1.64957e-57
TH	9.2032e-62	0.538994	0.057	0.031	1.6644e-57
DHDDS	9.82663e-62	0.167193	0.13	0.089	1.77715e-57
ZNF337	1.0235e-61	0.100804	0.168	0.121	1.851e-57
CMSS1	1.03613e-61	0.191544	0.119	0.08	1.87385e-57
RAB5IF	1.31631e-61	0.166612	0.136	0.094	2.38055e-57
ZDHHC16	1.31821e-61	0.163883	0.146	0.103	2.38399e-57
COG5	1.3712e-61	0.156244	0.139	0.096	2.47981e-57
IGSF9B	1.85264e-61	0.114356	0.136	0.094	3.3505e-57
CEP63	1.93852e-61	0.14946	0.135	0.093	3.50581e-57
ENDOV	1.96192e-61	0.100645	0.152	0.107	3.54814e-57
STOML2	2.0474e-61	0.183494	0.12	0.081	3.70272e-57
NOL7	2.79299e-61	0.202293	0.13	0.09	5.05113e-57
FAM160B2	2.86978e-61	0.174655	0.098	0.063	5.18999e-57
CFAP410	3.20038e-61	0.113268	0.129	0.088	5.78789e-57
ACTR2	3.29949e-61	0.23593	0.108	0.071	5.96713e-57
IFT22	3.43945e-61	0.147495	0.123	0.083	6.22024e-57
AKAP17A	3.83193e-61	0.142315	0.133	0.091	6.93004e-57
GLE1	3.94333e-61	0.236475	0.074	0.044	7.13151e-57
FLOT1	4.26019e-61	0.178797	0.1	0.064	7.70456e-57
UBE2A	4.41199e-61	0.111867	0.12	0.081	7.97909e-57
SPTLC1	4.43282e-61	0.153912	0.123	0.083	8.01675e-57
RALY	5.14162e-61	0.151262	0.085	0.052	9.29862e-57
EIF2B2	5.62484e-61	0.303545	0.092	0.059	1.01725e-56
NUP210	6.60814e-61	0.202878	0.08	0.049	1.19508e-56
ITGB3BP	6.64378e-61	0.420853	0.061	0.034	1.20153e-56
CBL	6.92788e-61	0.1797	0.116	0.078	1.25291e-56
ZBTB1	8.30224e-61	0.167209	0.103	0.067	1.50146e-56
PRKCA	8.57724e-61	0.10385	0.114	0.075	1.55119e-56
SLITRK4	9.40573e-61	-1.25836	0.034	0.057	1.70103e-56
ATG9A	9.44177e-61	0.300426	0.094	0.06	1.70754e-56
COG1	1.13102e-60	0.164885	0.136	0.094	2.04545e-56
THAP6	1.16054e-60	0.210809	0.087	0.054	2.09884e-56
ZRSR2	1.16714e-60	0.691771	0.03	0.012	2.11077e-56
CTSD	1.21179e-60	0.246412	0.082	0.051	2.19151e-56
MPP6	1.41109e-60	0.109992	0.112	0.074	2.55196e-56
LIMCH1	1.42885e-60	0.153693	0.13	0.089	2.58407e-56
HES5	1.47721e-60	0.264277	0.256	0.201	2.67154e-56
VEGFB	1.52037e-60	0.108261	0.176	0.127	2.74959e-56
RBM27	1.54095e-60	0.145528	0.17	0.123	2.78682e-56
ELOC	1.54111e-60	0.151923	0.133	0.092	2.7871e-56
RBBP6	1.56094e-60	0.165625	0.124	0.085	2.82297e-56
IFT57	1.64115e-60	0.177745	0.134	0.093	2.96803e-56
THNSL2	1.88789e-60	1.42891	0.024	0.008	3.41425e-56
TRAPPC13	2.03639e-60	0.157688	0.098	0.063	3.68281e-56
HIST1H1B	2.08447e-60	0.360235	0.148	0.105	3.76976e-56
STX2	2.41059e-60	0.146887	0.121	0.082	4.35954e-56
CDC25A	2.68605e-60	0.23717	0.078	0.047	4.85773e-56
SHMT2	2.72058e-60	0.420773	0.077	0.047	4.92018e-56
GRPEL1	3.16072e-60	0.31038	0.068	0.039	5.71617e-56
RPA1	3.45976e-60	0.174942	0.099	0.064	6.25697e-56
RNF8	3.81443e-60	0.165708	0.093	0.059	6.8984e-56
SLC35A5	4.42013e-60	0.172521	0.104	0.068	7.9938e-56
RNF14	4.66871e-60	0.106237	0.114	0.076	8.44337e-56
CLASRP	5.0898e-60	0.15408	0.128	0.088	9.20491e-56
DCTPP1	5.43295e-60	0.146901	0.098	0.063	9.82549e-56
P4HA2	5.88901e-60	0.557425	0.048	0.024	1.06503e-55
TMEM42	6.29192e-60	0.264875	0.072	0.042	1.13789e-55
NDUFA12	6.45552e-60	0.199859	0.094	0.06	1.16748e-55
SRR	6.63874e-60	0.161327	0.118	0.08	1.20062e-55
BAHD1	7.48083e-60	0.184066	0.105	0.069	1.35291e-55
ALDH3A2	7.90419e-60	0.112107	0.133	0.092	1.42947e-55
NSDHL	1.00645e-59	0.308172	0.078	0.047	1.82017e-55
ANO5	1.15438e-59	0.522433	0.038	0.017	2.08769e-55
NCBP1	1.33738e-59	0.134118	0.129	0.089	2.41866e-55
MSRB2	1.64693e-59	0.193368	0.093	0.06	2.97848e-55
SLC37A4	1.6962e-59	0.223723	0.087	0.054	3.06757e-55
MAP1S	1.83862e-59	0.105733	0.141	0.098	3.32514e-55
MBTPS2	2.11103e-59	0.147643	0.115	0.077	3.8178e-55
ASNSD1	2.14143e-59	0.11128	0.152	0.108	3.87277e-55
NECTIN2	2.66373e-59	0.20351	0.098	0.063	4.81736e-55
XPNPEP1	2.69794e-59	0.172731	0.122	0.083	4.87923e-55
ATP5PO	3.22835e-59	5.80045	0.01	0	5.83847e-55
GPR137	3.35153e-59	0.162936	0.1	0.065	6.06124e-55
RMND5B	3.72848e-59	0.108228	0.128	0.088	6.74296e-55
ZNF622	4.29785e-59	0.179986	0.126	0.087	7.77265e-55
SYT9	4.58022e-59	0.358958	0.056	0.031	8.28333e-55
GEMIN4	4.65696e-59	0.287999	0.055	0.03	8.42212e-55
CREG1	5.00998e-59	0.243384	0.091	0.058	9.06055e-55
PRKCSH	5.70308e-59	0.173146	0.119	0.081	1.0314e-54
ZNF23	6.66386e-59	0.391141	0.06	0.034	1.20516e-54
DUSP1	6.99577e-59	0.111607	0.123	0.083	1.26519e-54
SESN1	7.25942e-59	0.212631	0.086	0.054	1.31287e-54
GNPTG	7.89102e-59	0.163891	0.077	0.047	1.42709e-54
RGP1	8.85424e-59	0.140318	0.126	0.086	1.60129e-54
TRMT6	1.0046e-58	0.390509	0.063	0.036	1.81682e-54
ZDHHC20	1.15366e-58	0.144184	0.114	0.076	2.0864e-54
DONSON	1.32101e-58	0.112568	0.126	0.087	2.38904e-54
RPAP3	1.48878e-58	0.118984	0.135	0.094	2.69246e-54
SENP1	1.53919e-58	0.145837	0.13	0.09	2.78363e-54
CHCHD5	1.61328e-58	0.10112	0.131	0.091	2.91762e-54
ZNF680	1.7586e-58	0.184411	0.108	0.072	3.18042e-54
PIK3C2A	1.77645e-58	0.140032	0.11	0.073	3.2127e-54
LY6E	1.87039e-58	0.16778	0.098	0.064	3.3826e-54
PPP4R4	1.94995e-58	0.258485	0.062	0.035	3.52649e-54
ZBTB16	1.96064e-58	0.40814	0.054	0.029	3.54582e-54
ZNF14	2.03052e-58	0.305669	0.065	0.037	3.6722e-54
RAB9B	2.25482e-58	0.258423	0.07	0.042	4.07784e-54
LOXL1	2.53177e-58	0.297403	0.069	0.041	4.5787e-54
FYTTD1	2.73715e-58	0.108294	0.154	0.11	4.95014e-54
DDX39A	2.82109e-58	0.135734	0.148	0.105	5.10195e-54
ETNK2	2.89114e-58	0.302226	0.06	0.034	5.22862e-54
GPC3	3.36356e-58	0.653314	0.052	0.028	6.083e-54
AGO2	4.03344e-58	0.106949	0.138	0.096	7.29448e-54
DESI2	4.16593e-58	0.189238	0.099	0.064	7.53409e-54
DPH6	4.56699e-58	0.254325	0.08	0.05	8.25941e-54
COL4A5	4.71679e-58	0.495521	0.051	0.027	8.53031e-54
RMI1	4.99054e-58	0.132384	0.1	0.065	9.02539e-54
CTNNAL1	6.21444e-58	0.298146	0.063	0.036	1.12388e-53
DLAT	6.73213e-58	0.218962	0.09	0.057	1.21751e-53
SPATA18	6.73531e-58	1.15363	0.023	0.007	1.21808e-53
PLEKHA6	6.83329e-58	0.244906	0.076	0.046	1.2358e-53
TPRA1	6.86338e-58	0.330854	0.077	0.047	1.24124e-53
SPTY2D1	7.13133e-58	0.330542	0.101	0.067	1.2897e-53
CD81	7.22318e-58	0.272609	0.096	0.062	1.30631e-53
ARL1	9.713e-58	0.237396	0.143	0.102	1.7566e-53
CEP350	1.15291e-57	0.110135	0.116	0.079	2.08504e-53
RWDD1	1.18205e-57	0.177486	0.121	0.082	2.13774e-53
EDNRB	1.26303e-57	0.50286	0.063	0.037	2.28418e-53
ERP29	1.36259e-57	0.153947	0.109	0.073	2.46425e-53
CNDP2	1.39733e-57	0.106808	0.158	0.113	2.52708e-53
GMPR2	1.40883e-57	0.146573	0.097	0.063	2.54788e-53
RNF113A	1.42635e-57	0.343866	0.07	0.041	2.57955e-53
SERTAD2	1.53858e-57	0.368136	0.072	0.043	2.78252e-53
NDUFA13	1.79698e-57	0.179133	0.103	0.068	3.24984e-53
SLC18B1	1.85831e-57	0.274208	0.087	0.055	3.36076e-53
ATP5ME	2.86008e-57	0.10384	0.148	0.105	5.17245e-53
EMC8	3.11025e-57	0.12151	0.131	0.091	5.62489e-53
GNPDA1	3.12404e-57	0.234357	0.068	0.04	5.64982e-53
PNPLA2	3.14617e-57	0.193125	0.124	0.086	5.68986e-53
RPRD1B	3.46546e-57	0.152027	0.118	0.08	6.26728e-53
DLGAP3	3.85357e-57	0.122957	0.116	0.079	6.96918e-53
IFNGR1	4.50627e-57	0.162966	0.107	0.071	8.1496e-53
CRYAB	5.30353e-57	0.971874	0.033	0.014	9.59144e-53
TXNDC5	5.42275e-57	0.30735	0.09	0.058	9.80704e-53
TUT1	6.28941e-57	0.269211	0.096	0.063	1.13744e-52
CFAP221	6.31433e-57	0.249757	0.074	0.045	1.14195e-52
NPTX2	7.5706e-57	0.514647	0.046	0.023	1.36914e-52
UBAP2	7.72662e-57	0.122756	0.115	0.077	1.39736e-52
GPR180	7.79311e-57	0.385377	0.068	0.04	1.40938e-52
EIF2AK3	9.65244e-57	0.290752	0.096	0.063	1.74564e-52
FAM76B	1.00105e-56	0.155338	0.099	0.065	1.8104e-52
DDX54	1.08019e-56	0.222687	0.065	0.038	1.95353e-52
MTDH	1.2065e-56	0.110539	0.145	0.103	2.18195e-52
CEP170B	1.20855e-56	0.125578	0.095	0.061	2.18566e-52
BCAS3	1.3222e-56	0.175252	0.092	0.059	2.39119e-52
DYNC1I1	1.3621e-56	0.189003	0.086	0.055	2.46335e-52
DHRS13	1.53975e-56	0.12555	0.121	0.083	2.78464e-52
CXorf38	1.57945e-56	0.271727	0.078	0.048	2.85644e-52
COQ9	1.70067e-56	0.109321	0.138	0.097	3.07566e-52
TMEM134	1.82046e-56	0.213108	0.093	0.06	3.2923e-52
DNAJC4	1.93538e-56	0.110942	0.114	0.077	3.50014e-52
PTCH1	2.01209e-56	0.130127	0.082	0.051	3.63887e-52
APPL1	2.38511e-56	0.107997	0.181	0.134	4.31347e-52
CTSL	2.44294e-56	0.207939	0.078	0.048	4.41806e-52
AHI1	2.65544e-56	0.245135	0.106	0.071	4.80237e-52
CIAO2A	2.91986e-56	0.147097	0.091	0.058	5.28057e-52
TXLNA	3.31597e-56	0.179148	0.118	0.081	5.99693e-52
ACP1	3.39087e-56	0.158776	0.095	0.062	6.13239e-52
HCFC1R1	3.40563e-56	0.105224	0.129	0.09	6.15908e-52
EIF3D	3.42287e-56	0.187939	0.103	0.068	6.19026e-52
B4GALT7	3.53081e-56	0.210525	0.117	0.08	6.38547e-52
DBNDD2	3.88374e-56	0.192641	0.088	0.057	7.02374e-52
THUMPD1	4.84059e-56	0.162645	0.097	0.064	8.7542e-52
ZNF709	5.25741e-56	0.142482	0.088	0.056	9.50803e-52
DENND1A	5.52331e-56	0.143895	0.106	0.071	9.9889e-52
SNAPIN	6.31131e-56	0.150004	0.092	0.059	1.1414e-51
CLIC4	8.00238e-56	-0.111399	0.199	0.147	1.44723e-51
PSENEN	8.70612e-56	0.119599	0.151	0.109	1.5745e-51
TMEM179B	8.73363e-56	0.257904	0.085	0.054	1.57948e-51
MID1IP1	9.12162e-56	0.315251	0.077	0.048	1.64965e-51
SAPCD2	1.00108e-55	0.695859	0.035	0.016	1.81045e-51
RASSF7	1.04277e-55	0.286614	0.068	0.041	1.88586e-51
C19orf53	1.05735e-55	0.108959	0.131	0.092	1.91222e-51
SLC35G2	1.19044e-55	0.320022	0.074	0.046	2.15292e-51
DPP7	1.20199e-55	0.11464	0.124	0.086	2.17381e-51
BECN1	1.2336e-55	0.239098	0.08	0.05	2.23096e-51
PSMD9	1.26945e-55	0.155041	0.117	0.08	2.2958e-51
RTN4R	1.29454e-55	0.378275	0.058	0.033	2.34117e-51
BHLHE40	1.29481e-55	0.55088	0.065	0.039	2.34166e-51
TMEM214	1.33179e-55	0.286289	0.095	0.062	2.40853e-51
AK9	1.77618e-55	0.151767	0.09	0.058	3.21222e-51
NXN	2.06556e-55	0.135639	0.095	0.062	3.73556e-51
ZDHHC4	2.20383e-55	0.149339	0.156	0.113	3.98562e-51
LZTFL1	2.6305e-55	0.27384	0.087	0.056	4.75726e-51
MMP17	2.65992e-55	0.128533	0.099	0.065	4.81046e-51
C2orf74	2.66961e-55	0.126173	0.072	0.044	4.828e-51
SIGMAR1	2.80231e-55	0.192414	0.101	0.067	5.06799e-51
WDR24	2.96213e-55	0.182834	0.112	0.077	5.35701e-51
ATIC	3.17492e-55	0.206406	0.095	0.063	5.74185e-51
ALG2	3.18891e-55	0.237203	0.107	0.072	5.76715e-51
PSMG3	4.35579e-55	0.119538	0.165	0.121	7.87745e-51
RAD50	5.77913e-55	0.20164	0.084	0.053	1.04516e-50
SLC39A9	6.59211e-55	0.205814	0.135	0.096	1.19218e-50
NT5C	7.05882e-55	0.40797	0.064	0.038	1.27659e-50
ABHD12	7.18214e-55	0.301363	0.078	0.049	1.29889e-50
MTIF3	7.63864e-55	0.244357	0.064	0.037	1.38145e-50
CNOT11	7.64336e-55	0.11978	0.116	0.079	1.3823e-50
RNF175	7.68467e-55	0.218625	0.054	0.03	1.38977e-50
EBAG9	8.63996e-55	0.1621	0.106	0.071	1.56254e-50
SLC33A1	8.91323e-55	0.151603	0.132	0.093	1.61196e-50
ELP4	9.51639e-55	0.304326	0.089	0.058	1.72104e-50
RIOX1	1.03688e-54	0.119905	0.079	0.049	1.8752e-50
TAC3	1.05503e-54	1.94862	0.017	0.004	1.90802e-50
ALG5	1.0605e-54	0.15069	0.119	0.082	1.91791e-50
LRRC58	1.16102e-54	0.180648	0.098	0.064	2.09971e-50
PEMT	1.24449e-54	0.139643	0.114	0.078	2.25065e-50
COPRS	1.28019e-54	0.180207	0.092	0.06	2.31523e-50
ADA2	1.34318e-54	1.00532	0.02	0.006	2.42915e-50
CENPJ	1.45485e-54	0.151288	0.11	0.075	2.63111e-50
NQO2	1.46942e-54	0.435995	0.05	0.027	2.65744e-50
TSC1	1.51009e-54	0.134522	0.09	0.058	2.731e-50
ALYREF	1.71389e-54	0.25152	0.074	0.046	3.09957e-50
PNKD	1.77701e-54	0.131185	0.116	0.08	3.21372e-50
TMEM255A	1.94247e-54	0.5941	0.039	0.019	3.51296e-50
EXOSC7	3.07135e-54	0.106882	0.133	0.094	5.55454e-50
SPATA7	3.10095e-54	0.133143	0.115	0.079	5.60806e-50
ANKRD13A	3.26201e-54	0.133062	0.104	0.07	5.89934e-50
WRN	3.3774e-54	0.175015	0.107	0.072	6.10803e-50
EPB41L3	4.0215e-54	0.194904	0.07	0.043	7.27289e-50
SLC30A5	4.27357e-54	0.184416	0.126	0.088	7.72875e-50
L3MBTL1	5.34383e-54	0.123943	0.123	0.085	9.66433e-50
COG6	5.5588e-54	0.349164	0.076	0.047	1.00531e-49
GLT8D1	6.7523e-54	0.208739	0.087	0.056	1.22115e-49
CNNM3	7.05896e-54	0.139688	0.091	0.059	1.27661e-49
PLEKHH1	8.98808e-54	0.216406	0.061	0.035	1.62549e-49
CYGB	9.16491e-54	0.463848	0.037	0.017	1.65747e-49
GPR155	1.03897e-53	0.201914	0.058	0.033	1.87898e-49
REXO4	1.53592e-53	0.141529	0.108	0.073	2.77771e-49
LETM2	1.61387e-53	0.250049	0.073	0.045	2.91868e-49
NCOR2	1.61868e-53	0.111798	0.146	0.105	2.92738e-49
GORASP1	1.74617e-53	0.187114	0.079	0.05	3.15795e-49
MTMR14	1.7485e-53	0.243534	0.062	0.036	3.16217e-49
NADK2	1.83807e-53	0.128367	0.152	0.11	3.32414e-49
ANKRD54	1.9106e-53	0.125135	0.113	0.077	3.45531e-49
TYRO3	2.15841e-53	0.336632	0.062	0.036	3.90348e-49
GOLPH3L	2.2778e-53	0.395198	0.054	0.03	4.1194e-49
BCL10	2.83776e-53	0.124401	0.091	0.059	5.13209e-49
GTF2F2	3.04371e-53	0.149329	0.089	0.058	5.50455e-49
RFFL	3.0444e-53	0.290923	0.071	0.043	5.5058e-49
NARS2	3.05577e-53	0.183833	0.143	0.103	5.52637e-49
PPP3CC	3.35483e-53	0.107569	0.087	0.056	6.06722e-49
TCEAL5	3.59168e-53	0.243933	0.087	0.056	6.49555e-49
SFT2D1	3.63792e-53	0.172387	0.094	0.062	6.57918e-49
PTPRJ	4.11841e-53	0.150119	0.097	0.065	7.44815e-49
TSPAN18	4.31433e-53	0.162179	0.085	0.054	7.80246e-49
TMEM271	4.37545e-53	0.147998	0.086	0.055	7.913e-49
UFD1	4.50386e-53	0.185094	0.095	0.062	8.14523e-49
SNCG	6.44188e-53	0.615514	0.039	0.019	1.16501e-48
FAM120AOS	6.87472e-53	0.105188	0.113	0.078	1.24329e-48
PSMD14	7.29816e-53	0.238416	0.075	0.047	1.31987e-48
SLC9A7	9.61666e-53	0.218023	0.079	0.05	1.73917e-48
PSMG1	1.06484e-52	0.327099	0.062	0.036	1.92576e-48
MLH3	1.06656e-52	0.214725	0.077	0.049	1.92888e-48
MCFD2	1.15985e-52	0.125737	0.136	0.097	2.09759e-48
UBE2E2	1.45595e-52	0.152813	0.072	0.044	2.63309e-48
MGAT1	1.48651e-52	0.186323	0.091	0.06	2.68836e-48
GPX3	1.51359e-52	0.414511	0.051	0.028	2.73733e-48
TMEM14A	1.7493e-52	-0.650961	0.074	0.104	3.16362e-48
CCDC9	2.47356e-52	0.230317	0.126	0.09	4.47343e-48
MANBA	2.5829e-52	0.257478	0.089	0.058	4.67118e-48
DESI1	2.96468e-52	0.128978	0.11	0.075	5.36163e-48
GLO1	2.98659e-52	0.177881	0.085	0.055	5.40125e-48
ENDOG	3.10757e-52	0.101145	0.106	0.072	5.62003e-48
ABHD14A	3.32293e-52	0.214446	0.088	0.057	6.00951e-48
ABCC1	3.48735e-52	0.156694	0.077	0.049	6.30687e-48
SOX8	4.12907e-52	0.493992	0.053	0.03	7.46743e-48
ARFGEF2	4.46517e-52	0.148962	0.111	0.076	8.07526e-48
TMEM45A	4.84119e-52	0.4511	0.052	0.029	8.7553e-48
SLITRK2	5.30565e-52	-0.859124	0.044	0.067	9.59526e-48
MAD2L1	5.33774e-52	0.507388	0.039	0.019	9.6533e-48
BTBD6	5.46787e-52	0.174818	0.083	0.053	9.88865e-48
DCUN1D2	5.67289e-52	0.153392	0.084	0.054	1.02594e-47
CACNG2	6.71712e-52	0.130713	0.087	0.056	1.21479e-47
CALY	7.59471e-52	0.314748	0.066	0.04	1.3735e-47
CHRNA4	9.10199e-52	0.140495	0.078	0.049	1.64609e-47
HSPH1	9.78108e-52	-0.558405	0.122	0.157	1.76891e-47
GLRX5	1.08494e-51	0.157197	0.129	0.092	1.96212e-47
SCRN2	1.09259e-51	0.154483	0.094	0.062	1.97595e-47
NTPCR	1.11094e-51	0.194629	0.074	0.046	2.00914e-47
RALYL	1.26701e-51	0.112462	0.079	0.05	2.29138e-47
NPRL2	1.34411e-51	0.149243	0.165	0.123	2.43083e-47
VAPB	1.477e-51	0.114956	0.147	0.106	2.67115e-47
SLC25A33	1.51281e-51	0.271529	0.069	0.043	2.73592e-47
CIR1	1.61835e-51	0.189122	0.09	0.059	2.92679e-47
H2AFX	1.69342e-51	0.194401	0.078	0.049	3.06254e-47
ZSCAN30	1.85871e-51	0.15351	0.126	0.089	3.36148e-47
TMX1	1.91295e-51	0.133436	0.089	0.058	3.45958e-47
MAGOH	1.92877e-51	0.158067	0.113	0.078	3.48818e-47
GABRB1	1.99326e-51	0.146778	0.07	0.043	3.60482e-47
TMEM87A	1.99511e-51	0.167884	0.102	0.069	3.60816e-47
TMEM201	2.03783e-51	0.151252	0.102	0.069	3.68542e-47
NEFM	2.13764e-51	0.11849	0.097	0.065	3.86593e-47
NOCT	2.56857e-51	0.284747	0.094	0.063	4.64526e-47
ARHGEF1	2.78769e-51	0.158536	0.128	0.091	5.04153e-47
AKAP13	2.89413e-51	0.25334	0.067	0.041	5.23403e-47
FAM210A	3.28341e-51	0.173441	0.103	0.07	5.93805e-47
TBC1D13	3.29677e-51	0.153006	0.081	0.052	5.96222e-47
RBM7	3.32376e-51	0.15853	0.08	0.051	6.01103e-47
ACKR3	3.81428e-51	0.222691	0.068	0.042	6.89813e-47
TOGARAM1	3.87083e-51	0.100201	0.118	0.082	7.0004e-47
C1orf216	4.32793e-51	0.16985	0.076	0.048	7.82706e-47
POLR3D	4.39156e-51	0.1393	0.147	0.108	7.94214e-47
PIGH	4.4612e-51	0.231714	0.11	0.076	8.06809e-47
DDX51	5.58106e-51	0.268361	0.075	0.047	1.00934e-46
KLHL12	5.62538e-51	0.101924	0.135	0.096	1.01735e-46
VPS33A	6.18244e-51	0.17329	0.111	0.077	1.11809e-46
CHPF2	6.5883e-51	0.156553	0.102	0.069	1.19149e-46
ENTPD7	9.92924e-51	0.327056	0.081	0.052	1.7957e-46
NUP98	1.04828e-50	0.119483	0.123	0.087	1.89581e-46
PGRMC2	1.28292e-50	0.141591	0.15	0.11	2.32015e-46
TMEM14B	1.38207e-50	0.294849	0.082	0.053	2.49947e-46
PFKFB4	1.3958e-50	0.533139	0.059	0.035	2.5243e-46
FZD2	1.54666e-50	0.323877	0.067	0.041	2.79713e-46
PROSER3	1.61746e-50	0.103395	0.109	0.075	2.92518e-46
CYB561D2	1.81229e-50	0.356763	0.077	0.049	3.27753e-46
ICAM5	1.81946e-50	-0.795965	0.036	0.058	3.2905e-46
PCSK2	1.83195e-50	0.126913	0.08	0.051	3.31308e-46
HAUS2	1.85669e-50	0.194936	0.076	0.048	3.35782e-46
PTMS	1.89403e-50	-0.427637	0.247	0.285	3.42536e-46
ANXA7	2.06112e-50	0.157237	0.128	0.091	3.72754e-46
TRUB1	2.07756e-50	0.106608	0.112	0.078	3.75726e-46
HAS3	2.2819e-50	0.282781	0.056	0.032	4.12681e-46
RIF1	2.33433e-50	0.103264	0.104	0.07	4.22164e-46
ZBED6CL	2.52907e-50	2.70404	0.01	0.001	4.57383e-46
SARS	2.61268e-50	0.15246	0.132	0.095	4.72503e-46
CLOCK	2.72773e-50	0.20888	0.079	0.051	4.9331e-46
ARHGEF40	2.99972e-50	0.10355	0.117	0.082	5.42499e-46
ZNF248	3.00446e-50	-1.038	0.04	0.062	5.43356e-46
PLTP	3.10601e-50	0.165432	0.126	0.09	5.61723e-46
CERCAM	3.36001e-50	0.346241	0.042	0.022	6.07658e-46
ZNF510	3.43793e-50	0.163331	0.096	0.064	6.21749e-46
GRAMD1B	4.67229e-50	0.344245	0.048	0.026	8.44984e-46
DUSP7	5.43403e-50	0.116211	0.121	0.085	9.82745e-46
ARHGAP1	6.44362e-50	0.143621	0.116	0.081	1.16533e-45
ADCK2	7.43021e-50	0.222618	0.06	0.036	1.34375e-45
ARV1	7.67295e-50	0.138568	0.132	0.095	1.38765e-45
PPA2	9.76019e-50	0.213309	0.081	0.053	1.76513e-45
ETS2	1.02622e-49	0.151418	0.075	0.047	1.85593e-45
OCIAD2	1.06644e-49	-0.102826	0.217	0.164	1.92866e-45
SCD5	1.33744e-49	-0.12673	0.277	0.214	2.41877e-45
ACTL6A	1.35291e-49	0.187083	0.093	0.063	2.44673e-45
PPP2R2B	1.40231e-49	-0.112185	0.209	0.157	2.53608e-45
EPHB6	1.55858e-49	0.276231	0.049	0.027	2.8187e-45
ZNF131	1.68447e-49	0.12413	0.107	0.074	3.04636e-45
TTC23	1.82372e-49	0.428409	0.057	0.034	3.29819e-45
RNF26	1.95095e-49	0.131574	0.083	0.054	3.52829e-45
APRT	2.51412e-49	0.21482	0.075	0.048	4.54679e-45
GTF3C4	2.65706e-49	0.189882	0.107	0.074	4.8053e-45
UBAC2	2.78361e-49	0.207705	0.078	0.05	5.03416e-45
TNIP1	2.79801e-49	0.277025	0.076	0.049	5.0602e-45
CENPX	2.82644e-49	0.203178	0.07	0.044	5.11162e-45
SLC25A27	3.01189e-49	0.108335	0.089	0.059	5.44701e-45
TM9SF2	3.79393e-49	-0.493374	0.197	0.232	6.86132e-45
ZNF12	3.84372e-49	0.11466	0.086	0.056	6.95137e-45
ODF2	3.88991e-49	0.119693	0.139	0.101	7.03491e-45
CDKN2AIP	3.96728e-49	0.237197	0.078	0.05	7.17483e-45
COL4A6	4.05482e-49	0.58867	0.031	0.014	7.33314e-45
MTA3	4.60192e-49	0.110214	0.084	0.055	8.32257e-45
BAIAP3	4.9985e-49	0.106683	0.136	0.098	9.03978e-45
FAM189B	6.03024e-49	0.165426	0.081	0.053	1.09057e-44
C5orf15	6.71384e-49	0.212493	0.078	0.05	1.2142e-44
SMARCB1	7.01196e-49	-0.117479	0.264	0.202	1.26811e-44
RASSF1	7.54924e-49	0.200684	0.088	0.059	1.36528e-44
COX17	9.07225e-49	0.14941	0.112	0.078	1.64072e-44
ZNF777	9.26785e-49	0.133479	0.077	0.049	1.67609e-44
TYMS	1.34418e-48	0.20351	0.091	0.061	2.43095e-44
COQ10B	1.45572e-48	0.195024	0.136	0.099	2.63268e-44
RASGRF1	1.4588e-48	0.227775	0.067	0.041	2.63823e-44
CARF	1.46669e-48	0.221468	0.074	0.047	2.6525e-44
ZNF518B	1.50947e-48	0.116998	0.069	0.043	2.72987e-44
FNTB	1.75158e-48	0.276396	0.051	0.029	3.16774e-44
FAM217B	1.7945e-48	0.138088	0.092	0.062	3.24536e-44
ARSD	1.86862e-48	0.74761	0.022	0.008	3.37939e-44
IER2	2.09483e-48	0.115906	0.116	0.081	3.78851e-44
VKORC1	2.45433e-48	0.109859	0.19	0.145	4.43866e-44
UTP23	2.63311e-48	0.110972	0.152	0.112	4.76198e-44
SELENON	2.67384e-48	0.153006	0.126	0.09	4.83564e-44
SNRPG	3.00667e-48	0.186354	0.092	0.062	5.43757e-44
SIAH2	3.09929e-48	0.14748	0.111	0.078	5.60506e-44
SMC5	3.35727e-48	0.179159	0.082	0.053	6.07163e-44
CCNB1	3.69942e-48	0.289867	0.06	0.036	6.6904e-44
KNSTRN	3.81697e-48	0.174402	0.076	0.049	6.903e-44
EXOSC8	5.57541e-48	0.119574	0.1	0.068	1.00831e-43
PTRHD1	5.84509e-48	0.16868	0.058	0.034	1.05708e-43
LITAF	5.97719e-48	0.11749	0.09	0.06	1.08097e-43
LARP4B	5.98024e-48	0.117914	0.119	0.084	1.08153e-43
TMEM67	6.12985e-48	0.133377	0.096	0.065	1.10858e-43
METTL23	6.56432e-48	0.163361	0.093	0.063	1.18716e-43
GDPD5	7.94549e-48	0.290865	0.048	0.027	1.43694e-43
RFC4	8.36925e-48	0.156853	0.1	0.068	1.51358e-43
TMEM231	8.65881e-48	0.269534	0.06	0.036	1.56595e-43
MTHFR	9.32034e-48	0.120799	0.113	0.079	1.68558e-43
ROBO3	9.60471e-48	-0.153543	0.223	0.169	1.73701e-43
KIAA2013	1.02933e-47	0.122474	0.093	0.062	1.86154e-43
RAPGEF6	1.07353e-47	-0.145156	0.183	0.136	1.94148e-43
IRS2	1.12149e-47	0.165844	0.119	0.085	2.02822e-43
EVI5	1.33524e-47	0.145276	0.121	0.086	2.41478e-43
DCAF4	1.42568e-47	0.450756	0.041	0.022	2.57835e-43
EHD1	1.42878e-47	0.134521	0.132	0.095	2.58395e-43
RBM23	1.51866e-47	-0.117596	0.19	0.142	2.7465e-43
RAVER1	1.56777e-47	0.177333	0.084	0.056	2.83532e-43
GBX2	1.92936e-47	-0.169856	0.145	0.104	3.48925e-43
TUSC2	1.98054e-47	0.120723	0.099	0.068	3.58181e-43
METTL5	2.03777e-47	0.12267	0.127	0.091	3.68531e-43
FAM207A	2.25325e-47	0.238263	0.08	0.052	4.07501e-43
KMT2C	2.32761e-47	-0.107226	0.319	0.251	4.20949e-43
CRB2	2.45775e-47	0.268133	0.058	0.035	4.44484e-43
IFT43	2.60148e-47	0.137573	0.135	0.098	4.70477e-43
AGBL5	2.92435e-47	0.107766	0.131	0.095	5.28869e-43
TMUB1	3.38391e-47	0.165777	0.104	0.073	6.1198e-43
MLF1	3.52066e-47	0.216208	0.088	0.059	6.36712e-43
AASDH	3.66659e-47	0.152776	0.073	0.047	6.63102e-43
CIAO3	3.95977e-47	0.148302	0.073	0.046	7.16125e-43
LIPA	4.12877e-47	0.308573	0.065	0.04	7.46688e-43
RRP12	4.18863e-47	0.371696	0.07	0.044	7.57513e-43
HIP1	4.21104e-47	0.100234	0.098	0.067	7.61567e-43
ATP6AP2	4.67645e-47	0.249798	0.163	0.124	8.45735e-43
SARNP	4.70026e-47	0.240168	0.065	0.04	8.50041e-43
POLR3H	4.98609e-47	0.126568	0.12	0.085	9.01735e-43
GCHFR	5.48138e-47	0.416897	0.047	0.026	9.91308e-43
KLHL5	6.60537e-47	-0.155752	0.179	0.133	1.19458e-42
PRDX6	6.76619e-47	0.352682	0.052	0.03	1.22367e-42
RFT1	6.81415e-47	0.123472	0.103	0.072	1.23234e-42
TALDO1	7.22992e-47	0.222843	0.082	0.054	1.30753e-42
TMEM184C	7.32587e-47	0.107268	0.111	0.078	1.32488e-42
CCDC8	7.57023e-47	0.238188	0.068	0.043	1.36908e-42
UBE2T	8.61948e-47	0.234558	0.067	0.042	1.55883e-42
CARD19	9.3328e-47	0.170447	0.054	0.032	1.68784e-42
C19orf25	9.81076e-47	0.152056	0.115	0.082	1.77428e-42
ZNF598	1.12475e-46	0.226072	0.094	0.064	2.0341e-42
RDH13	1.12762e-46	0.13278	0.056	0.033	2.03931e-42
SLC37A1	1.14707e-46	0.133434	0.109	0.076	2.07448e-42
NECTIN3	1.17397e-46	0.210528	0.117	0.083	2.12312e-42
SAE1	1.18161e-46	0.100049	0.116	0.082	2.13695e-42
DTYMK	1.2028e-46	0.288249	0.082	0.054	2.17526e-42
LRFN1	1.29511e-46	0.117096	0.079	0.051	2.34221e-42
MOK	1.36056e-46	0.11261	0.114	0.081	2.46058e-42
MCEE	1.52e-46	0.253921	0.091	0.062	2.74892e-42
EPB41L4B	1.81101e-46	0.238903	0.071	0.045	3.2752e-42
SMIM20	1.96745e-46	0.183707	0.074	0.048	3.55814e-42
TRAF3	2.19622e-46	0.179067	0.069	0.044	3.97187e-42
SH3D21	2.22894e-46	0.591194	0.037	0.019	4.03105e-42
EIF2AK4	2.33353e-46	0.209509	0.06	0.037	4.22019e-42
GLB1	2.43855e-46	0.296937	0.052	0.03	4.41011e-42
GFPT2	2.59468e-46	0.425345	0.035	0.017	4.69249e-42
NMNAT2	2.6981e-46	-0.103569	0.345	0.273	4.8795e-42
RTN4	3.15542e-46	-0.129435	0.364	0.287	5.70657e-42
SOGA1	3.7935e-46	-0.140483	0.272	0.211	6.86054e-42
DECR1	3.87968e-46	0.419268	0.046	0.025	7.0164e-42
RWDD4	4.6083e-46	0.204713	0.083	0.055	8.33411e-42
NKX6-1	4.75619e-46	0.904058	0.013	0.003	8.60156e-42
SCML1	5.34382e-46	0.448011	0.044	0.025	9.6643e-42
COQ8A	5.69919e-46	0.3963	0.05	0.029	1.0307e-41
FAM89B	6.30523e-46	-0.105114	0.238	0.183	1.1403e-41
LSG1	7.71103e-46	0.163124	0.099	0.069	1.39454e-41
WDR34	7.84814e-46	0.146827	0.088	0.059	1.41934e-41
FEN1	7.92244e-46	0.305529	0.055	0.033	1.43277e-41
LATS1	8.00772e-46	0.108933	0.117	0.083	1.4482e-41
NEDD1	8.09106e-46	0.330915	0.042	0.023	1.46327e-41
RAB3C	8.30092e-46	-0.145956	0.262	0.202	1.50122e-41
PCYT1B	8.39754e-46	0.277921	0.042	0.023	1.5187e-41
NHS	8.77803e-46	0.584811	0.032	0.015	1.58751e-41
NRG3	9.66625e-46	0.126999	0.066	0.041	1.74814e-41
DDX3X	9.92188e-46	0.103162	0.134	0.098	1.79437e-41
TBL3	1.00761e-45	0.122496	0.116	0.082	1.82226e-41
CYFIP1	1.09044e-45	0.167357	0.058	0.035	1.97206e-41
RTP5	1.11254e-45	0.34919	0.042	0.023	2.01203e-41
XPR1	1.11786e-45	-0.111961	0.369	0.292	2.02164e-41
TTC12	1.13194e-45	0.490433	0.039	0.02	2.04711e-41
ZMYND19	1.26642e-45	0.145789	0.104	0.073	2.29031e-41
MACROD1	1.31249e-45	0.239382	0.072	0.047	2.37364e-41
ZNF133	1.36859e-45	0.131953	0.079	0.052	2.4751e-41
SCN2A	1.3943e-45	-0.117013	0.15	0.109	2.5216e-41
NINJ1	1.42979e-45	0.276134	0.04	0.021	2.58578e-41
CREM	1.48182e-45	0.132535	0.11	0.077	2.67987e-41
FAM20C	1.49154e-45	0.103839	0.108	0.075	2.69745e-41
TBCE.1	1.61238e-45	0.209287	0.077	0.05	2.91599e-41
SHISA4	1.75865e-45	0.197923	0.073	0.047	3.18053e-41
LMNB1	1.89294e-45	-0.10437	0.225	0.173	3.42338e-41
ZNF3	2.2988e-45	0.113052	0.098	0.067	4.15738e-41
CRY1	2.49386e-45	0.109701	0.12	0.086	4.51014e-41
NRBF2	2.49635e-45	0.169041	0.076	0.05	4.51464e-41
ARHGEF7	2.60361e-45	-0.109034	0.282	0.221	4.70863e-41
OGFOD1	2.80349e-45	0.12823	0.113	0.081	5.07011e-41
LGR5	2.84408e-45	1.28201	0.016	0.005	5.14351e-41
ALG8	3.25583e-45	0.197757	0.079	0.052	5.88817e-41
INPP5A	3.31946e-45	0.124736	0.115	0.082	6.00325e-41
STOML1	3.43135e-45	0.25936	0.058	0.035	6.20559e-41
PSMA5	3.79228e-45	0.262262	0.077	0.051	6.85834e-41
AEBP1	4.08164e-45	0.51757	0.034	0.017	7.38165e-41
CTBP2	4.31355e-45	-0.125406	0.18	0.135	7.80106e-41
FCF1	5.65324e-45	0.193843	0.085	0.057	1.02239e-40
SEPTIN8	5.68381e-45	0.149186	0.095	0.065	1.02792e-40
PCDH9	6.79897e-45	0.162181	0.078	0.051	1.22959e-40
PHKG2	7.66534e-45	0.130727	0.114	0.081	1.38628e-40
FUBP1	7.68598e-45	-0.133337	0.218	0.166	1.39001e-40
EMC6	7.76468e-45	0.226833	0.078	0.051	1.40424e-40
TRAPPC2L	7.81533e-45	0.16475	0.078	0.051	1.4134e-40
NLGN2	8.20189e-45	-0.458993	0.12	0.153	1.48331e-40
HIST1H2BH	8.40713e-45	0.201784	0.06	0.037	1.52043e-40
SLC25A6	8.43313e-45	-0.111062	0.177	0.132	1.52513e-40
GAN	9.23178e-45	0.173736	0.085	0.057	1.66957e-40
SERPINI1	1.02778e-44	0.290501	0.042	0.023	1.85874e-40
AEN	1.0943e-44	0.152536	0.114	0.081	1.97903e-40
PPAT	1.29782e-44	0.175362	0.11	0.078	2.34711e-40
CEP170	1.3006e-44	-0.103722	0.274	0.214	2.35214e-40
SP1	1.39772e-44	0.120385	0.084	0.056	2.52778e-40
PCDHGA7	1.46063e-44	0.840052	0.021	0.008	2.64154e-40
USP8	1.49485e-44	0.127986	0.091	0.061	2.70343e-40
ATAD3A	1.51337e-44	0.227746	0.101	0.071	2.73692e-40
KCNJ9	1.56403e-44	0.171295	0.078	0.051	2.82855e-40
LIAS	1.60823e-44	0.238317	0.069	0.044	2.90848e-40
RDH14	1.70101e-44	0.1731	0.08	0.053	3.07628e-40
PSKH1	1.72447e-44	0.124637	0.09	0.062	3.1187e-40
AATK	1.72779e-44	0.133009	0.074	0.048	3.12471e-40
SEMA4F	1.72841e-44	0.208524	0.058	0.035	3.12584e-40
PCDHGA8	1.86628e-44	0.397052	0.034	0.017	3.37517e-40
PIM3	1.99447e-44	0.243485	0.088	0.06	3.607e-40
NEBL	2.0672e-44	0.253873	0.06	0.037	3.73853e-40
TNFRSF13C	2.1383e-44	0.765064	0.025	0.01	3.86711e-40
SCARF2	2.16033e-44	0.369079	0.049	0.028	3.90696e-40
KDM2B	2.46759e-44	0.14597	0.096	0.066	4.46264e-40
KHDRBS3	2.56626e-44	0.462344	0.05	0.029	4.64108e-40
ROBO1	2.67868e-44	-0.168012	0.273	0.212	4.84439e-40
GLYR1	3.48426e-44	0.156508	0.077	0.051	6.30129e-40
SYS1	3.49665e-44	0.192333	0.096	0.066	6.32369e-40
COCH	3.58187e-44	0.108315	0.057	0.034	6.47782e-40
ZMAT1	3.97778e-44	0.342467	0.049	0.028	7.19382e-40
AACS	4.12079e-44	0.101379	0.096	0.066	7.45246e-40
PCMTD1	4.1931e-44	-0.105113	0.278	0.218	7.58322e-40
IER3IP1	4.2561e-44	0.150423	0.125	0.091	7.69716e-40
SDK2	4.28644e-44	0.362374	0.056	0.034	7.75203e-40
BCAM	4.34832e-44	0.632001	0.034	0.017	7.86393e-40
AK4	4.41744e-44	0.361597	0.067	0.043	7.98894e-40
APBB1	4.59354e-44	-0.108732	0.286	0.224	8.30742e-40
ATG101	4.69689e-44	0.182463	0.111	0.079	8.49433e-40
NECAB3	5.11564e-44	0.230755	0.076	0.05	9.25163e-40
PEX26	5.76089e-44	0.124962	0.083	0.056	1.04186e-39
URB1	6.024e-44	0.220421	0.095	0.065	1.08944e-39
CDK5	6.48964e-44	0.133318	0.097	0.068	1.17365e-39
PIGM	6.68495e-44	0.164104	0.086	0.058	1.20897e-39
CAB39L	6.98419e-44	0.120878	0.083	0.055	1.26309e-39
TNS1	7.52194e-44	0.490679	0.038	0.02	1.36034e-39
CYP2R1	7.68275e-44	0.135834	0.098	0.068	1.38943e-39
PDK1	7.90197e-44	-0.629431	0.063	0.088	1.42907e-39
CYCS	8.67488e-44	0.196645	0.082	0.055	1.56885e-39
LRRC55	8.93914e-44	0.212395	0.061	0.038	1.61664e-39
TXNRD3	9.3907e-44	0.207622	0.058	0.035	1.69831e-39
ADCY3	1.0129e-43	0.188933	0.058	0.035	1.83183e-39
SLC25A26	1.02307e-43	0.156481	0.09	0.061	1.85023e-39
NOP10	1.04289e-43	0.139528	0.107	0.075	1.88607e-39
TLN2	1.14594e-43	-1.04333	0.023	0.039	2.07243e-39
ERCC5	1.19442e-43	0.139213	0.116	0.084	2.1601e-39
FLII	1.29641e-43	0.138379	0.117	0.084	2.34456e-39
FUT11	1.36449e-43	0.330145	0.053	0.032	2.46769e-39
JPT1	1.51807e-43	-0.125677	0.279	0.218	2.74543e-39
SLC27A3	1.55937e-43	0.249795	0.063	0.04	2.82012e-39
ATP2B3	1.62873e-43	0.22259	0.061	0.038	2.94555e-39
ZNF687	1.74524e-43	0.263131	0.068	0.044	3.15626e-39
PREP	1.79335e-43	0.138587	0.085	0.057	3.24327e-39
TCP11L2	1.83806e-43	0.222219	0.046	0.026	3.32414e-39
CLASP1	2.06553e-43	-0.101868	0.216	0.166	3.73551e-39
AP3M2	2.22264e-43	0.137793	0.076	0.05	4.01964e-39
PPID	2.39667e-43	0.123129	0.109	0.078	4.33438e-39
FBLN1	2.49986e-43	0.216376	0.047	0.027	4.52099e-39
SLC26A2	2.79854e-43	0.379277	0.042	0.023	5.06117e-39
PPM1H	2.80584e-43	0.568194	0.034	0.017	5.07437e-39
DGKB	2.94207e-43	0.19339	0.061	0.038	5.32074e-39
NFS1	3.19802e-43	0.211996	0.068	0.043	5.78362e-39
NGLY1	3.2517e-43	0.187936	0.073	0.047	5.88071e-39
ITM2B	3.28385e-43	-0.137135	0.217	0.167	5.93884e-39
PIGS	3.29505e-43	0.158761	0.084	0.057	5.95911e-39
PEX3	3.97753e-43	0.15883	0.091	0.063	7.19336e-39
COA5	4.15987e-43	0.114802	0.065	0.041	7.52313e-39
BCL7B	4.24879e-43	0.126358	0.091	0.063	7.68393e-39
SNRPA1	4.31926e-43	0.1227	0.092	0.063	7.81139e-39
OSTC	4.44213e-43	0.365882	0.052	0.031	8.0336e-39
UNG	4.57278e-43	0.162045	0.063	0.04	8.26987e-39
RXRA	4.753e-43	0.239239	0.06	0.037	8.59579e-39
FOXP4	4.89806e-43	0.295925	0.057	0.035	8.85815e-39
ZC3H3	4.97809e-43	0.1164	0.098	0.068	9.00287e-39
RIOK1	5.09073e-43	0.145257	0.065	0.041	9.20658e-39
GTF2H3	5.89715e-43	0.219193	0.062	0.039	1.0665e-38
ACO1	6.08744e-43	0.18228	0.079	0.052	1.10091e-38
SLC25A13	6.23848e-43	0.145006	0.067	0.043	1.12823e-38
ZNF280C	6.27025e-43	0.193733	0.075	0.049	1.13397e-38
RAB39B	6.33052e-43	0.104296	0.1	0.07	1.14487e-38
TTLL12	6.78135e-43	0.210231	0.061	0.038	1.22641e-38
NRP2	9.84616e-43	-0.635577	0.054	0.078	1.78068e-38
PRUNE1	9.99172e-43	0.150064	0.085	0.057	1.807e-38
ZMAT5	1.31006e-42	0.193441	0.084	0.057	2.36924e-38
KLHL36	1.54927e-42	0.114529	0.085	0.057	2.80185e-38
GTF3A	1.58044e-42	0.18686	0.082	0.055	2.85822e-38
RAP1GAP	1.60859e-42	0.159992	0.076	0.05	2.90913e-38
MARCH8	2.05462e-42	0.162557	0.068	0.044	3.71578e-38
CARS	2.28813e-42	0.26752	0.055	0.034	4.13809e-38
DCTN2	2.30628e-42	-0.154522	0.308	0.242	4.1709e-38
CWC25	2.57844e-42	0.264906	0.065	0.042	4.66312e-38
PLAGL1	2.64859e-42	0.295734	0.044	0.025	4.78997e-38
MBD4	2.70934e-42	0.154271	0.103	0.073	4.89984e-38
CNTN1	2.90017e-42	-0.119288	0.308	0.244	5.24495e-38
INVS	3.0478e-42	0.143882	0.099	0.069	5.51194e-38
CALM1	3.14471e-42	0.122551	0.074	0.049	5.68721e-38
PRSS53	3.1727e-42	0.347825	0.05	0.03	5.73782e-38
DIAPH2	3.51936e-42	0.476691	0.024	0.01	6.36476e-38
FAM133A	3.65327e-42	0.864701	0.021	0.009	6.60694e-38
RAB11FIP5	3.75218e-42	0.45864	0.04	0.022	6.78581e-38
CHST3	3.94092e-42	0.423394	0.039	0.022	7.12716e-38
SULF1	4.07021e-42	0.328059	0.036	0.019	7.36097e-38
SLC25A38	4.09464e-42	0.154229	0.072	0.047	7.40516e-38
ERFL	4.25395e-42	0.365871	0.051	0.031	7.69327e-38
DCTN6	4.34482e-42	-0.101078	0.165	0.124	7.8576e-38
TAPBP	4.66426e-42	0.252604	0.05	0.03	8.43531e-38
SOD2	4.79963e-42	0.10782	0.114	0.082	8.68013e-38
MAP6	4.80865e-42	-0.126101	0.432	0.347	8.69644e-38
TMEM218	5.08155e-42	0.284355	0.063	0.04	9.18999e-38
NPM3	5.55825e-42	0.231369	0.078	0.052	1.00521e-37
INF2	5.91534e-42	0.407763	0.046	0.027	1.06979e-37
ZMYM1	5.92702e-42	0.117088	0.079	0.053	1.0719e-37
NUDT7	6.17196e-42	0.485112	0.031	0.015	1.1162e-37
PLPBP	6.34621e-42	0.149765	0.087	0.059	1.14771e-37
NPEPL1	7.11416e-42	-0.148885	0.156	0.116	1.2866e-37
IFRD1	7.15049e-42	-0.622962	0.049	0.071	1.29317e-37
AAR2	7.43988e-42	0.146794	0.06	0.038	1.3455e-37
COL4A1	7.84137e-42	0.379024	0.035	0.018	1.41811e-37
GCLC	8.28239e-42	0.101537	0.062	0.039	1.49787e-37
HAGH	8.82208e-42	0.128218	0.12	0.088	1.59547e-37
PARP11	9.0012e-42	0.166576	0.066	0.042	1.62787e-37
RORA	9.42826e-42	0.616733	0.03	0.015	1.7051e-37
KCNQ2	1.0497e-41	-0.104278	0.214	0.165	1.89838e-37
MAPK8	1.13843e-41	-0.112025	0.244	0.19	2.05885e-37
THOP1	1.16195e-41	0.115875	0.102	0.072	2.10138e-37
NBL1	1.27833e-41	0.583581	0.026	0.011	2.31187e-37
ASAH1	1.33692e-41	0.177852	0.106	0.076	2.41782e-37
MRI1	1.4341e-41	0.234726	0.051	0.03	2.59356e-37
GEMIN7	1.58406e-41	0.16525	0.072	0.047	2.86477e-37
ZNF703	1.59401e-41	0.311517	0.051	0.031	2.88278e-37
NEMF	1.59973e-41	-0.146471	0.137	0.1	2.89311e-37
LRCH1	1.62101e-41	0.116306	0.07	0.046	2.93159e-37
ZBTB11	1.71226e-41	0.125099	0.093	0.064	3.09663e-37
FGF14	1.72279e-41	-0.119314	0.24	0.187	3.11567e-37
RASGRF2	1.86852e-41	-1.59294	0.012	0.024	3.37922e-37
MTFP1	1.90887e-41	0.456224	0.047	0.028	3.45219e-37
ILK	2.0734e-41	0.245384	0.073	0.048	3.74975e-37
PXN	2.11065e-41	0.314698	0.054	0.033	3.81711e-37
RAB33B	2.29242e-41	0.124408	0.1	0.071	4.14584e-37
ASPSCR1	2.46379e-41	0.115813	0.102	0.072	4.45577e-37
CUTC	2.72056e-41	0.200735	0.073	0.048	4.92014e-37
PTPRN2	2.74104e-41	-0.110737	0.213	0.165	4.95716e-37
SUV39H2	2.74758e-41	0.134768	0.074	0.049	4.96901e-37
GPD2	3.16823e-41	0.382914	0.03	0.015	5.72975e-37
LSM5	3.44945e-41	0.105524	0.087	0.06	6.23834e-37
QPCTL	3.46941e-41	0.332201	0.064	0.041	6.27442e-37
ATP5F1A	3.47982e-41	-0.543146	0.071	0.096	6.29325e-37
TMSB4X	3.6847e-41	-0.189644	0.876	0.83	6.66379e-37
RNF13	3.84149e-41	0.163779	0.073	0.048	6.94733e-37
ENKD1	3.86317e-41	0.12436	0.092	0.064	6.98655e-37
GOLGA7B	4.17066e-41	-0.111802	0.104	0.073	7.54264e-37
ARRDC1	4.40233e-41	0.146147	0.08	0.054	7.96162e-37
DPP9	4.43707e-41	0.193203	0.084	0.058	8.02443e-37
BIN3	4.54428e-41	0.181273	0.076	0.051	8.21832e-37
ZNF275	4.60389e-41	0.126199	0.068	0.044	8.32614e-37
EIF1AD	4.89238e-41	0.113729	0.104	0.074	8.84787e-37
FAM98A	5.20357e-41	0.166265	0.086	0.059	9.41066e-37
DCAF1	5.30484e-41	0.122993	0.086	0.059	9.5938e-37
HYOU1	5.35493e-41	-0.516515	0.088	0.115	9.6844e-37
SDF2L1	5.39134e-41	0.310025	0.052	0.031	9.75024e-37
SEMA4C	6.23478e-41	-0.125366	0.21	0.162	1.12756e-36
FABP3	6.31563e-41	0.37926	0.046	0.026	1.14218e-36
RPF2	6.42513e-41	0.179154	0.086	0.06	1.16198e-36
TMEM70	6.47543e-41	0.108549	0.091	0.063	1.17108e-36
ZNF316	6.93027e-41	-0.1477	0.21	0.162	1.25334e-36
CPNE7	7.09312e-41	0.533722	0.032	0.016	1.28279e-36
C6orf52	7.18085e-41	0.331497	0.055	0.034	1.29866e-36
ZC3H13	7.44379e-41	-0.121767	0.195	0.149	1.34621e-36
PIGZ	7.47099e-41	0.314959	0.038	0.02	1.35113e-36
ESCO1	7.64685e-41	0.130127	0.099	0.07	1.38293e-36
UBFD1	8.12819e-41	0.1153	0.074	0.049	1.46998e-36
SLC35B3	8.3599e-41	0.350841	0.054	0.033	1.51189e-36
ELMSAN1	8.81507e-41	0.181159	0.071	0.047	1.59421e-36
PIH1D1	8.82148e-41	0.176895	0.094	0.066	1.59537e-36
TFAM	8.98459e-41	0.16249	0.073	0.048	1.62486e-36
FN3KRP	9.88581e-41	0.149467	0.083	0.057	1.78785e-36
DOCK11	1.08328e-40	0.109726	0.075	0.05	1.95911e-36
CENPS	1.09221e-40	0.197941	0.06	0.038	1.97525e-36
RUNX1T1	1.17942e-40	-0.135152	0.316	0.249	2.13298e-36
MTERF2	1.21285e-40	0.120774	0.071	0.047	2.19344e-36
PERP	1.25893e-40	0.371271	0.037	0.02	2.27678e-36
MPHOSPH10	1.33331e-40	0.105119	0.104	0.075	2.41128e-36
ZMYND8	1.33705e-40	-0.126134	0.174	0.131	2.41805e-36
SPATA6	1.49668e-40	0.299894	0.046	0.027	2.70675e-36
ADAMTS2	1.51184e-40	0.907932	0.019	0.007	2.73416e-36
BCDIN3D	1.5763e-40	0.176635	0.054	0.034	2.85074e-36
RHPN2	1.64801e-40	0.533796	0.031	0.016	2.98043e-36
IDH3A	1.75529e-40	0.209311	0.078	0.052	3.17443e-36
HIGD1A	1.96157e-40	0.149092	0.082	0.056	3.5475e-36
TAGLN	2.15326e-40	0.322419	0.063	0.04	3.89418e-36
NIBAN2	2.20663e-40	0.254085	0.048	0.028	3.99069e-36
NCAPH2	2.33325e-40	0.105665	0.115	0.084	4.21969e-36
TCTN3	2.47297e-40	0.145785	0.073	0.049	4.47236e-36
ZNRF1	2.50887e-40	-0.112928	0.292	0.231	4.5373e-36
MED13L	2.53278e-40	-0.112281	0.182	0.139	4.58053e-36
NCSTN	2.67113e-40	0.124088	0.127	0.094	4.83074e-36
ANXA6	2.71815e-40	0.179522	0.077	0.051	4.91577e-36
LRRC73	3.15923e-40	0.307964	0.045	0.026	5.71346e-36
SLC1A5	3.38282e-40	0.203504	0.123	0.091	6.11783e-36
EIF2B3	3.40109e-40	0.14338	0.101	0.072	6.15088e-36
YWHAG	3.50915e-40	-0.113681	0.395	0.318	6.34629e-36
HDAC9	3.55377e-40	0.185531	0.07	0.046	6.427e-36
ERICH1	3.62561e-40	0.173517	0.075	0.05	6.55691e-36
CINP	3.66839e-40	0.167424	0.078	0.053	6.63428e-36
MYADM	3.80062e-40	0.154797	0.069	0.045	6.87343e-36
NRN1	4.43827e-40	0.690596	0.024	0.01	8.02662e-36
MAPK7	4.55855e-40	0.119275	0.14	0.105	8.24414e-36
C5orf30	5.51593e-40	0.180605	0.065	0.042	9.97556e-36
PDS5A	5.66896e-40	0.166299	0.081	0.055	1.02523e-35
ZNF823	6.64446e-40	0.283048	0.046	0.027	1.20165e-35
SDC3	7.88856e-40	-0.109666	0.436	0.351	1.42665e-35
EMC9	8.01738e-40	0.109538	0.087	0.06	1.44994e-35
ZNF529	8.09856e-40	0.244902	0.057	0.036	1.46462e-35
CHRDL1	8.19572e-40	0.88256	0.015	0.004	1.4822e-35
SDHAF1	1.00285e-39	0.121052	0.079	0.054	1.81366e-35
C12orf65	1.03439e-39	0.278217	0.053	0.033	1.8707e-35
CDC20	1.08959e-39	0.372124	0.029	0.014	1.97052e-35
SUSD1	1.26344e-39	0.296232	0.048	0.028	2.28493e-35
NUDT22	1.28215e-39	0.329075	0.06	0.038	2.31877e-35
CDR2	1.32209e-39	0.212484	0.075	0.051	2.39099e-35
SMIM30	1.39766e-39	0.106192	0.095	0.067	2.52767e-35
RAMP2	1.42762e-39	0.251146	0.048	0.028	2.58184e-35
TBCE	1.46798e-39	0.170272	0.075	0.05	2.65484e-35
GON7	1.47775e-39	0.293033	0.083	0.058	2.67251e-35
MOB3B	1.82611e-39	0.34761	0.049	0.029	3.30252e-35
UNC5A	1.83301e-39	0.168165	0.054	0.034	3.315e-35
OTUD6B	1.92209e-39	0.223396	0.069	0.046	3.47609e-35
PPP1R9A	1.9824e-39	-0.119754	0.135	0.1	3.58518e-35
TNRC6A	2.21472e-39	-0.125229	0.251	0.197	4.00532e-35
COPE	2.24374e-39	-0.593791	0.067	0.091	4.0578e-35
MOGS	2.42298e-39	0.11145	0.154	0.117	4.38197e-35
CYB5A	2.42875e-39	0.346329	0.052	0.032	4.39239e-35
MAGI3	2.49465e-39	0.126979	0.052	0.032	4.51158e-35
DNAJC25	2.87336e-39	0.142715	0.124	0.092	5.19648e-35
DNAL4	3.10681e-39	0.119478	0.079	0.054	5.61867e-35
CLIP2	3.18436e-39	-0.173691	0.198	0.152	5.75891e-35
SYTL2	3.41961e-39	0.792226	0.02	0.008	6.18436e-35
TMEM74B	3.4811e-39	-0.139006	0.138	0.102	6.29557e-35
YRDC	3.75355e-39	0.168589	0.088	0.062	6.7883e-35
TPM1	4.13165e-39	-0.119712	0.166	0.125	7.47208e-35
SAC3D1	4.26934e-39	0.222342	0.07	0.047	7.72111e-35
ZNF841	4.31621e-39	0.118856	0.085	0.059	7.80586e-35
SLC23A2	4.53027e-39	-0.158691	0.163	0.123	8.19299e-35
NTRK2	5.71713e-39	-0.217337	0.172	0.13	1.03394e-34
C11orf1	5.79851e-39	0.164319	0.104	0.075	1.04866e-34
FUCA2	5.91787e-39	0.221749	0.028	0.014	1.07025e-34
ABHD5	6.16311e-39	0.175524	0.077	0.052	1.1146e-34
TUSC1	6.30201e-39	0.786005	0.028	0.014	1.13972e-34
SMIM18	6.74981e-39	0.109799	0.056	0.035	1.2207e-34
PRCC	7.12128e-39	-0.106985	0.177	0.135	1.28788e-34
GCK	7.1789e-39	0.522961	0.03	0.015	1.2983e-34
STARD10	8.0781e-39	0.11039	0.077	0.052	1.46092e-34
STK33	8.48888e-39	-0.715697	0.039	0.058	1.53521e-34
CBLL1	8.80198e-39	0.126627	0.083	0.057	1.59184e-34
NEMP1	9.57086e-39	0.27578	0.041	0.023	1.73089e-34
PCSK7	1.03609e-38	0.113391	0.09	0.063	1.87377e-34
RIOK2	1.04149e-38	0.127326	0.091	0.064	1.88354e-34
GUF1	1.07556e-38	0.143283	0.088	0.061	1.94515e-34
COMMD10	1.09399e-38	0.514301	0.028	0.013	1.97848e-34
DOHH	1.12341e-38	0.1448	0.075	0.051	2.03169e-34
RWDD2A	1.13406e-38	0.230687	0.056	0.035	2.05095e-34
PLD3	1.25728e-38	-0.4075	0.192	0.225	2.2738e-34
TMEM229B	1.25827e-38	0.168895	0.036	0.019	2.27558e-34
AMMECR1	1.29702e-38	0.595623	0.025	0.011	2.34566e-34
FAN1	1.34973e-38	-1.00764	0.044	0.064	2.44099e-34
FAM210B	1.36728e-38	0.242014	0.043	0.025	2.47272e-34
GAL3ST1	1.36907e-38	0.456718	0.025	0.012	2.47597e-34
WDR89	1.44595e-38	0.157564	0.078	0.053	2.61499e-34
ZNF213	1.49437e-38	0.186451	0.064	0.041	2.70256e-34
DOC2B	1.5602e-38	0.156639	0.063	0.04	2.82162e-34
BORA	1.58812e-38	0.423964	0.05	0.031	2.87211e-34
PIGK	1.6737e-38	0.106777	0.099	0.071	3.02689e-34
HEBP2	1.67474e-38	0.336143	0.038	0.021	3.02876e-34
EBPL	1.72658e-38	0.187333	0.037	0.02	3.12251e-34
GLB1L2	1.8016e-38	0.684403	0.022	0.01	3.2582e-34
S100A6	1.83559e-38	0.43983	0.049	0.029	3.31966e-34
STK32A	1.94177e-38	0.395106	0.028	0.013	3.5117e-34
ZSWIM1	2.06432e-38	0.137993	0.06	0.038	3.73332e-34
YAP1	2.07279e-38	0.291793	0.065	0.042	3.74863e-34
KIN	2.15952e-38	0.176502	0.054	0.034	3.90549e-34
DDX55	2.28825e-38	0.146672	0.081	0.056	4.13831e-34
COASY	2.31386e-38	0.155288	0.08	0.055	4.18461e-34
AKAP9	2.7274e-38	-0.118486	0.279	0.222	4.9325e-34
CDC40	2.73949e-38	0.156059	0.057	0.036	4.95436e-34
RNF166	2.75554e-38	0.220818	0.058	0.037	4.98339e-34
ZSWIM5	2.8754e-38	-0.115027	0.151	0.113	5.20015e-34
RABEP1	2.92236e-38	-0.106251	0.199	0.154	5.28508e-34
WBP11	3.06603e-38	0.168904	0.067	0.044	5.54491e-34
ZNF280D	3.21386e-38	0.149318	0.054	0.033	5.81227e-34
GALNS	3.21489e-38	0.124908	0.07	0.046	5.81414e-34
LRRC42	3.21945e-38	0.107061	0.067	0.044	5.82237e-34
AVPI1	3.39888e-38	0.525265	0.038	0.021	6.14687e-34
NME6	3.58514e-38	0.123201	0.086	0.06	6.48372e-34
CELSR1	3.60988e-38	0.307645	0.048	0.029	6.52847e-34
SMC2	3.83531e-38	0.168007	0.057	0.036	6.93615e-34
C16orf46	3.87491e-38	0.336319	0.053	0.033	7.00778e-34
ZNF557	4.43266e-38	0.127048	0.074	0.05	8.01646e-34
ZFPL1	4.93062e-38	0.317737	0.048	0.029	8.91703e-34
GATM	5.40256e-38	0.156058	0.062	0.04	9.77052e-34
FAM204A	6.74588e-38	0.118881	0.073	0.049	1.21999e-33
CDHR1	6.89083e-38	0.23628	0.048	0.029	1.24621e-33
NXT1	6.91585e-38	0.146937	0.087	0.061	1.25073e-33
CDKAL1	7.24349e-38	0.107724	0.087	0.06	1.30998e-33
SMAD2	7.26842e-38	-0.120261	0.166	0.126	1.31449e-33
ANKS1B	7.31057e-38	-0.149816	0.158	0.12	1.32212e-33
PSMB7	7.78163e-38	0.128746	0.079	0.054	1.40731e-33
MAML3	8.07613e-38	0.140566	0.086	0.06	1.46057e-33
DLL1	8.80209e-38	0.115679	0.076	0.051	1.59186e-33
SLC27A5	9.33079e-38	0.185122	0.068	0.045	1.68747e-33
LMO2	9.34631e-38	0.347584	0.044	0.026	1.69028e-33
MEGF6	9.41196e-38	0.410835	0.032	0.017	1.70215e-33
NYAP1	1.09628e-37	-0.140595	0.208	0.162	1.98262e-33
LSM6	1.10449e-37	0.100055	0.095	0.068	1.99746e-33
B4GALT6	1.11398e-37	0.153588	0.059	0.038	2.01463e-33
CLEC11A	1.14314e-37	0.193255	0.076	0.052	2.06736e-33
MID2	1.20901e-37	0.19468	0.042	0.025	2.1865e-33
[truncated: 4,332 more rows]

## Sheet: IP-InhibN-CGE
Gene	p_val	avg_log2FC	pct.1	pct.2	p_val_adj
USP11	0	0.978805	0.526	0.291	0
CDK16	0	1.10383	0.42	0.198	0
DCX	0	1.20075	0.921	0.711	0
NAP1L3	0	1.2115	0.339	0.152	0
EEF2	0	0.534548	0.711	0.526	0
PSMD10	0	1.12744	0.314	0.14	0
PBX3	0	0.679863	0.519	0.347	0
KIF1A	0	-3.5908	0.016	0.187	0
GABBR1	0	0.74847	0.405	0.24	0
SPTAN1	0	-3.57939	0.015	0.179	0
LENG8	0	0.596672	0.474	0.316	0
KLC1	0	-3.30711	0.021	0.173	0
GRIA1	0	0.752415	0.395	0.247	0
STMN4	0	0.568481	0.553	0.406	0
LAPTM4B	0	0.73424	0.361	0.219	0
PTMS	0	-1.96371	0.079	0.214	0
AP1S2	0	1.02884	0.241	0.108	0
WLS	0	1.05769	0.21	0.093	0
PLD3	0	-2.22792	0.047	0.162	0
DDX3Y	0	-15.035	0	0.114	0
TIMP2	0	-3.65539	0.01	0.114	0
TM9SF2	0	-2.14793	0.045	0.146	0
PAX6	0	1.09793	0.167	0.072	0
CHCHD2	0	-2.41709	0.033	0.121	0
NLGN2	0	-3.31383	0.009	0.094	0
TLCD3B	0	-2.87979	0.011	0.088	0
SRP54	0	-3.10482	0.009	0.083	0
USP9Y	0	-14.2961	0	0.069	0
NRP2	0	-3.57163	0.005	0.074	0
MT-ND2	0	-0.539994	0.775	0.843	0
KHDRBS1	0	-3.32284	0.007	0.074	0
TMEM14A	0	-3.38493	0.007	0.074	0
MT-ATP6	0	-0.600916	0.854	0.918	0
ARVCF	0	-3.33382	0.007	0.071	0
MARCKSL1	0	-0.435288	0.715	0.777	0
MT-CYB	0	-0.449112	0.778	0.84	0
HSPA1B	0	-3.80109	0.005	0.066	0
TUBB2B	0	0.286247	0.941	0.881	0
UTY	0	-14.0456	0	0.059	0
KDM5D	0	-14.0567	0	0.059	0
ST8SIA4	0	-4.24192	0.003	0.059	0
EIF1AY	0	-13.9566	0	0.053	0
MT-CO3	0	-0.388729	0.896	0.946	0
SRSF4	4.81492e-307	-3.07017	0.008	0.067	8.70778e-303
SRPRB	6.84334e-306	-3.16941	0.007	0.064	1.23762e-301
PDK1	6.3016e-305	-3.06862	0.009	0.068	1.13964e-300
ADGRL3	3.45836e-304	-3.34252	0.007	0.065	6.25444e-300
LRCH2	1.35237e-302	0.823073	0.207	0.104	2.44576e-298
HNRNPH3	3.51055e-301	-1.20956	0.164	0.27	6.34882e-297
TMEM167A	8.51708e-301	-3.25603	0.006	0.062	1.54031e-296
ASPH	5.31879e-298	-1.9717	0.038	0.115	9.61903e-294
ATP6V0B	1.85402e-297	-1.70862	0.062	0.15	3.35299e-293
HNRNPU	2.19024e-296	-3.14774	0.006	0.061	3.96105e-292
IDH2	3.11781e-293	-2.78345	0.01	0.069	5.63855e-289
HYOU1	5.59961e-293	-2.84703	0.01	0.068	1.01269e-288
GALNT13	2.05876e-291	1.15008	0.129	0.052	3.72326e-287
GPM6A	2.36879e-290	0.483573	0.566	0.42	4.28396e-286
CDH20	1.19122e-286	1.79527	0.07	0.017	2.15432e-282
PAK3	9.75745e-286	0.992494	0.167	0.078	1.76463e-281
HSPH1	9.05705e-285	-2.17285	0.025	0.094	1.63797e-280
ATP5F1A	2.84116e-283	-3.64596	0.004	0.055	5.13823e-279
KDM4B	4.65674e-273	-3.27423	0.006	0.057	8.42172e-269
TSHZ1	9.05079e-262	1.00862	0.126	0.052	1.63684e-257
ERBB4	2.86217e-255	1.29082	0.102	0.038	5.17624e-251
CNR1	1.31548e-254	0.814357	0.214	0.118	2.37904e-250
TMEM14C	1.8731e-250	-2.67739	0.011	0.063	3.3875e-246
MXRA7	8.69525e-249	0.52359	0.36	0.234	1.57254e-244
PFN2	3.35265e-248	-0.682205	0.409	0.487	6.06326e-244
ITM2C	7.13823e-248	-1.19727	0.133	0.225	1.29095e-243
ALG13	2.06281e-245	0.722421	0.202	0.108	3.73059e-241
CPNE6	8.33053e-243	2.50282	0.042	0.006	1.50658e-238
KLF12	1.14936e-241	-2.75146	0.009	0.059	2.07861e-237
HMGCS1	2.90865e-241	-1.77087	0.043	0.112	5.2603e-237
ZNF608	3.59912e-241	0.755802	0.199	0.107	6.50901e-237
TMED7	2.573e-236	-2.10564	0.019	0.076	4.65328e-232
SCARB2	1.23635e-234	0.493949	0.388	0.262	2.23593e-230
COPE	8.34945e-234	-3.15314	0.006	0.051	1.51e-229
SEC61G	2.39566e-229	-2.44143	0.013	0.064	4.33254e-225
NDNF	6.35101e-226	1.68779	0.058	0.015	1.14858e-221
SEPTIN7	1.49118e-224	-3.35656	0.004	0.044	2.69681e-220
VSNL1	1.16752e-221	-1.29414	0.065	0.14	2.11146e-217
MT-ND4	1.67178e-221	-0.321075	0.855	0.885	3.02341e-217
EIF1	2.2683e-221	0.481864	0.414	0.286	4.10222e-217
TCEAL1	2.35076e-221	1.01569	0.115	0.05	4.25135e-217
TXLNG	3.65578e-221	1.20971	0.095	0.037	6.61147e-217
SYT10	3.70402e-219	1.24089	0.086	0.031	6.69872e-215
ADAM23	2.35454e-218	-3.16633	0.004	0.045	4.25819e-214
GAD1	3.18543e-214	0.456493	0.373	0.251	5.76085e-210
EIF3L	3.05365e-213	-1.95651	0.026	0.082	5.52252e-209
HNRNPLL	9.59367e-213	-3.30604	0.004	0.043	1.73502e-208
TIMM8B	1.00959e-205	-2.9345	0.006	0.047	1.82585e-201
KPNB1	1.10059e-203	-3.37063	0.004	0.041	1.99043e-199
ZIC1	5.66572e-203	-0.732818	0.245	0.335	1.02465e-198
PRMT2	7.21934e-203	-1.36943	0.082	0.155	1.30562e-198
VCAN	4.0335e-202	-0.551909	0.346	0.44	7.29459e-198
RAF1	2.32786e-201	-2.65893	0.009	0.052	4.20993e-197
ATRX	3.94227e-201	-1.74665	0.034	0.093	7.12959e-197
PSMB4	2.53018e-199	-2.72956	0.008	0.049	4.57584e-195
IFRD1	1.23843e-196	-3.27166	0.004	0.041	2.2397e-192
PRPF8	4.33497e-192	-2.42317	0.01	0.051	7.8398e-188
NCL	6.987e-190	-2.0346	0.021	0.07	1.2636e-185
EEF1G	7.19854e-189	0.347052	0.576	0.45	1.30186e-184
BAG6	6.75429e-188	-1.01459	0.16	0.24	1.22151e-183
GABBR2	1.20594e-187	0.895226	0.118	0.056	2.18094e-183
HNRNPA0	2.64492e-187	-0.799325	0.26	0.339	4.78334e-183
RBBP7	1.13634e-186	0.804274	0.131	0.065	2.05507e-182
EIF3M	6.37145e-186	-3.33809	0.004	0.039	1.15228e-181
KALRN	1.14059e-185	-1.54328	0.054	0.117	2.06276e-181
ATXN2	1.96235e-184	-1.65067	0.034	0.089	3.5489e-180
SNX17	2.69592e-183	-3.02734	0.003	0.037	4.87557e-179
RIMS4	3.00564e-183	0.569993	0.236	0.146	5.43569e-179
STAG2	2.73315e-182	-3.30564	0.003	0.037	4.9429e-178
PCDH8	3.76898e-182	1.13954	0.071	0.026	6.81619e-178
RASA1	5.16983e-182	-2.56839	0.008	0.047	9.34963e-178
SPOCK3	1.41101e-181	1.3183	0.063	0.021	2.55181e-177
ADGRL2	1.00306e-180	-2.68334	0.008	0.046	1.81404e-176
MT-ND4L	1.24402e-180	-0.280095	0.868	0.891	2.2498e-176
STMN2	5.93813e-180	0.290067	0.824	0.735	1.07391e-175
GPHN	2.11123e-178	0.52408	0.235	0.146	3.81817e-174
FUT9	1.57046e-177	0.616805	0.226	0.14	2.84018e-173
SOD1	6.55304e-177	-2.67968	0.008	0.046	1.18512e-172
TMCO3	5.34615e-176	-3.11138	0.003	0.036	9.66851e-172
BCL11A	4.29378e-175	0.315419	0.426	0.306	7.76531e-171
DIRAS2	1.19302e-174	0.855767	0.104	0.048	2.15758e-170
GNG4	4.67858e-174	0.406015	0.353	0.245	8.46121e-170
ZNF229	7.48981e-174	-3.07044	0.005	0.038	1.35453e-169
GPR85	1.34646e-173	0.616225	0.183	0.106	2.43507e-169
ARNT2	7.3933e-172	-2.74698	0.006	0.041	1.33708e-167
TMEM147	1.35713e-169	-2.37649	0.011	0.05	2.45436e-165
TMEM127	2.19437e-169	-3.06194	0.005	0.037	3.96852e-165
SCD5	3.13753e-169	0.455101	0.306	0.207	5.67422e-165
SPAG7	3.27346e-169	-2.82549	0.006	0.039	5.92005e-165
EIF4H	3.34654e-169	-2.25654	0.01	0.049	6.05222e-165
CASP3	8.59737e-169	0.608528	0.176	0.102	1.55484e-164
GNRH1	5.27207e-168	-0.608952	0.195	0.283	9.53454e-164
TCEAL3	1.23182e-165	0.769928	0.117	0.058	2.22775e-161
DTNA	4.43996e-165	0.538114	0.245	0.158	8.02966e-161
MT-ND1	9.56567e-165	-0.484916	0.494	0.551	1.72995e-160
PREPL	5.12358e-164	0.373478	0.489	0.372	9.26599e-160
NCALD	1.25795e-163	-1.81801	0.022	0.067	2.27501e-159
NRP1	2.90356e-163	-0.937261	0.059	0.122	5.25108e-159
NDUFA4	5.11916e-163	0.358985	0.463	0.348	9.25801e-159
RMND5A	1.52254e-162	0.559777	0.195	0.117	2.75352e-158
HMGN1	1.62095e-162	0.536143	0.251	0.163	2.93149e-158
INTS8	2.08351e-160	-2.30852	0.009	0.045	3.76802e-156
NLGN4X	3.02217e-160	0.904802	0.103	0.049	5.46559e-156
ASH2L	1.79113e-156	-3.35647	0.003	0.032	3.23925e-152
KAT6A	1.89013e-155	-1.77175	0.024	0.069	3.4183e-151
HPCA	6.56584e-155	0.953519	0.077	0.032	1.18743e-150
KLHDC3	1.15588e-154	-1.69808	0.027	0.073	2.09042e-150
SYAP1	8.24082e-153	0.679124	0.133	0.072	1.49035e-148
SNCA	9.85641e-153	0.517782	0.26	0.175	1.78253e-148
POMP	2.4027e-152	-3.2261	0.003	0.032	4.34529e-148
ING4	3.96537e-152	-2.82496	0.004	0.034	7.17137e-148
SRD5A1	3.68517e-151	-2.86428	0.006	0.037	6.66463e-147
MYO16	5.76138e-150	0.724059	0.125	0.067	1.04195e-145
ATG12	6.73474e-150	-3.27273	0.003	0.031	1.21798e-145
SEZ6	8.36837e-150	0.455704	0.235	0.152	1.51342e-145
SEPTIN2	9.23181e-150	-1.8055	0.021	0.062	1.66957e-145
RUNX1T1	2.14432e-149	0.336581	0.381	0.274	3.87801e-145
SEC14L1	3.51925e-149	0.488965	0.221	0.14	6.36456e-145
HMGN4	4.63445e-149	-2.67531	0.006	0.037	8.3814e-145
SPINK5	4.87199e-149	2.76835	0.023	0.002	8.81099e-145
ARRDC3	5.51546e-149	0.363744	0.433	0.323	9.97471e-145
EIF4G1	5.30985e-148	-3.18094	0.003	0.032	9.60287e-144
HNRNPK	5.10036e-147	-0.967367	0.078	0.14	9.22399e-143
CNTNAP2	1.34523e-146	0.327676	0.407	0.298	2.43285e-142
TMEM167B	2.48043e-146	-2.86264	0.004	0.032	4.48585e-142
YBX1	5.20927e-146	0.282383	0.607	0.494	9.42096e-142
TM7SF3	6.92147e-146	-3.10338	0.003	0.031	1.25175e-141
PCDH11X	1.17522e-145	1.50381	0.043	0.012	2.12538e-141
OLFM1	1.4611e-145	0.381193	0.352	0.253	2.64241e-141
ROBO2	1.65622e-145	0.423214	0.222	0.141	2.99528e-141
RNF11	7.26194e-145	0.400653	0.305	0.212	1.31332e-140
PHB2	1.93372e-144	-2.96105	0.003	0.031	3.49713e-140
NPEPL1	1.96884e-144	0.565578	0.179	0.109	3.56065e-140
JTB	1.11957e-143	-2.65805	0.005	0.034	2.02474e-139
SMS	4.56599e-143	0.436087	0.308	0.216	8.25759e-139
USP9X	1.42877e-142	0.563699	0.201	0.128	2.58394e-138
CACNG7	2.40188e-142	0.486098	0.22	0.142	4.3438e-138
ZADH2	1.47411e-141	0.707004	0.108	0.055	2.66593e-137
CHL1	1.49624e-141	0.566718	0.138	0.077	2.70594e-137
VAMP2	3.68741e-141	0.346963	0.457	0.35	6.66867e-137
STK33	1.21912e-140	-2.95226	0.005	0.034	2.20479e-136
GPR137C	6.22406e-140	0.541534	0.202	0.128	1.12562e-135
PCYT1B	2.41139e-138	0.987156	0.067	0.028	4.36099e-134
SMC1A	1.20699e-137	0.506449	0.225	0.148	2.18285e-133
PPP4R4	4.56323e-137	1.1556	0.056	0.021	8.25261e-133
KLHDC2	4.2714e-136	-1.17352	0.066	0.121	7.72483e-132
ISL1	5.69992e-136	-1.5451	0.021	0.061	1.03083e-131
FGF19	8.31024e-136	-2.15716	0.009	0.04	1.50291e-131
SLITRK4	1.92277e-135	-2.941	0.006	0.034	3.47732e-131
KIF5C	2.65622e-135	-0.572451	0.376	0.432	4.80377e-131
CCNI	3.67689e-135	0.263825	0.708	0.599	6.64965e-131
CNTN1	3.93277e-135	0.488084	0.257	0.176	7.11241e-131
ZFP28	2.53189e-134	-1.85983	0.022	0.061	4.57892e-130
IVNS1ABP	7.40397e-134	-1.9675	0.014	0.048	1.33901e-129
TMEM74B	1.47936e-133	0.491983	0.209	0.135	2.67543e-129
ATXN1	5.74651e-133	0.4208	0.229	0.151	1.03926e-128
BCL2L1	6.02403e-133	0.390255	0.231	0.152	1.08945e-128
ZNF521	8.55538e-133	-0.893378	0.113	0.177	1.54724e-128
ELAVL2	1.08782e-132	0.448086	0.207	0.133	1.96733e-128
CHD9	1.41945e-132	0.416492	0.232	0.153	2.56708e-128
TMEM11	1.19193e-131	-2.69832	0.004	0.031	2.15561e-127
DOK6	2.23931e-131	0.586181	0.145	0.085	4.04979e-127
SLC25A23	4.76043e-131	0.495222	0.196	0.125	8.60923e-127
KCNC2	9.01676e-131	1.14058	0.065	0.028	1.63068e-126
LMBR1L	9.28688e-131	0.469215	0.201	0.129	1.67953e-126
ITM2B	2.50449e-130	0.548549	0.19	0.121	4.52938e-126
HSDL1	2.86286e-130	-1.30632	0.055	0.106	5.17748e-126
AUTS2	2.91458e-130	-0.411391	0.44	0.499	5.27102e-126
BAHCC1	4.71921e-130	-2.28865	0.009	0.039	8.5347e-126
FAM171B	6.6373e-130	0.41344	0.237	0.158	1.20036e-125
TMEM106C	9.54466e-130	-1.85535	0.02	0.058	1.72615e-125
ARL2BP	3.88401e-129	-1.72658	0.022	0.06	7.02423e-125
GAS7	1.24715e-128	0.392872	0.22	0.144	2.25547e-124
PTGER3	2.51506e-128	-2.3213	0.009	0.04	4.54848e-124
PRRC2A	2.88618e-128	-1.95728	0.012	0.045	5.21966e-124
ZNF248	3.35657e-128	-1.72418	0.024	0.063	6.07036e-124
TMEM158	1.14548e-127	-4.21785	0.001	0.024	2.07161e-123
BRWD1	1.2625e-127	0.39654	0.254	0.172	2.28323e-123
CACNA1H	5.70377e-127	0.460291	0.207	0.134	1.03153e-122
TOMM20	7.6723e-127	0.320702	0.411	0.309	1.38754e-122
SCG5	1.62694e-126	0.412783	0.264	0.182	2.94232e-122
FOXG1	2.93344e-126	-0.532178	0.377	0.431	5.30513e-122
SPOCK2	3.55825e-126	0.453785	0.24	0.162	6.43509e-122
SRPRA	4.63652e-126	-1.44572	0.032	0.073	8.38516e-122
PSAT1	4.93733e-126	0.654533	0.148	0.089	8.92917e-122
RTN3	3.63238e-125	0.215706	0.754	0.663	6.56917e-121
PRDX4	5.61971e-125	0.759074	0.112	0.061	1.01632e-120
TIMM50	8.50127e-125	-2.22261	0.008	0.037	1.53745e-120
CDH23	1.67505e-124	0.779172	0.084	0.041	3.02932e-120
CAMKV	2.42059e-123	0.360236	0.281	0.197	4.37763e-119
RNF157	3.37841e-123	0.478416	0.207	0.135	6.10986e-119
C2CD5	1.77973e-122	-1.83033	0.017	0.052	3.21864e-118
GPCPD1	2.40423e-122	0.452781	0.194	0.125	4.34804e-118
MEF2C	2.78455e-122	0.600061	0.141	0.084	5.03585e-118
GRAMD1A	4.9314e-122	0.473524	0.206	0.136	8.91844e-118
TSTD1	7.72004e-122	1.32691	0.035	0.01	1.39617e-117
GNAZ	1.07264e-121	0.548566	0.159	0.098	1.93986e-117
PJA2	1.68024e-121	0.27842	0.553	0.445	3.03871e-117
ATP5F1B	2.67727e-121	0.31976	0.395	0.296	4.84184e-117
TMEM59	3.3456e-121	-2.13028	0.01	0.04	6.05053e-117
TIMM17A	6.28906e-121	-3.06662	0.003	0.026	1.13738e-116
PRRT4	6.54827e-121	0.624624	0.109	0.059	1.18425e-116
CSDE1	8.6934e-121	-1.75349	0.02	0.056	1.5722e-116
TAF7	1.95981e-120	0.355754	0.328	0.238	3.54431e-116
PCLO	5.96393e-120	0.421756	0.264	0.185	1.07858e-115
TIMM44	1.62722e-119	-2.59073	0.006	0.031	2.94282e-115
TMEM59L	1.75436e-119	0.311769	0.431	0.332	3.17277e-115
H1F0	1.81241e-119	0.451433	0.155	0.094	3.27774e-115
TMOD2	3.15344e-119	0.349481	0.337	0.247	5.70301e-115
GALR1	5.21857e-119	1.92302	0.026	0.005	9.43778e-115
IFT81	5.58355e-119	-1.67015	0.021	0.056	1.00978e-114
SPTLC2	4.13071e-118	-3.06911	0.002	0.024	7.47039e-114
VPS13C	4.79894e-118	-1.4699	0.029	0.069	8.67887e-114
STAT2	5.50753e-118	-3.02336	0.003	0.025	9.96037e-114
ZFY	5.80273e-118	-12.3911	0	0.019	1.04942e-113
DYNC1H1	7.10846e-118	0.425125	0.222	0.149	1.28557e-113
NAPB	7.19513e-118	0.452783	0.21	0.14	1.30124e-113
PTPRT	9.36155e-118	-0.624627	0.096	0.157	1.69304e-113
SAT1	1.52711e-117	0.817287	0.093	0.049	2.76178e-113
CRABP1	3.4308e-117	0.446353	0.128	0.074	6.2046e-113
DYNC1I1	4.40939e-117	0.656083	0.103	0.056	7.97439e-113
EIF4G2	5.47107e-117	-1.01763	0.115	0.172	9.89444e-113
ADCY2	4.92373e-116	0.66514	0.09	0.046	8.90456e-112
LRP11	5.39823e-116	0.528557	0.161	0.101	9.76269e-112
NELL2	8.66144e-116	-1.85415	0.015	0.047	1.56642e-111
RGS8	1.08879e-115	0.552557	0.1	0.053	1.96908e-111
KDM4A	1.27972e-115	-1.50482	0.026	0.063	2.31437e-111
MUC20	1.51873e-115	1.01077	0.057	0.024	2.74663e-111
DKK3	1.54776e-115	0.407198	0.243	0.168	2.79912e-111
CLASP2	2.15458e-115	0.2827	0.521	0.417	3.89657e-111
GRIA2	1.42628e-114	0.268431	0.544	0.441	2.57943e-110
MYO6	2.28289e-114	0.4779	0.209	0.14	4.12861e-110
ATG4A	2.47313e-114	1.1057	0.054	0.022	4.47265e-110
INA	2.29411e-113	-0.496804	0.397	0.444	4.1489e-109
GLCCI1	2.31503e-113	0.583137	0.119	0.068	4.18674e-109
ARHGAP23	5.88833e-113	-2.30438	0.006	0.032	1.06491e-108
NDUFA5	6.72377e-113	0.393393	0.213	0.142	1.21599e-108
PCBP3	1.1588e-112	1.26981	0.041	0.014	2.09569e-108
LGI1	1.63318e-112	1.08963	0.057	0.024	2.95361e-108
RASGRP2	1.74585e-112	1.10842	0.048	0.018	3.15736e-108
PPP1R1A	1.90244e-112	0.442128	0.204	0.136	3.44055e-108
VPS72	1.16758e-111	-1.45537	0.03	0.068	2.11156e-107
CDH22	3.69609e-111	1.02044	0.051	0.02	6.68438e-107
KIFC2	4.58455e-111	0.411708	0.239	0.166	8.29116e-107
TSPAN9	4.73785e-111	0.509326	0.137	0.083	8.5684e-107
DAB1	8.10842e-111	0.563028	0.115	0.066	1.46641e-106
USP37	1.46001e-110	-2.28169	0.006	0.03	2.64043e-106
FABP3	2.57108e-110	0.790966	0.061	0.027	4.64981e-106
MATN2	3.29662e-110	1.94059	0.022	0.004	5.96195e-106
CPLX2	3.84513e-110	0.453986	0.175	0.112	6.95391e-106
RIMBP2	5.54037e-110	0.689426	0.093	0.05	1.00198e-105
KLHDC9	5.70562e-110	-2.72295	0.005	0.028	1.03186e-105
PTPRK	6.95453e-110	0.8717	0.064	0.029	1.25773e-105
GRIA4	2.61703e-109	0.813127	0.071	0.034	4.73289e-105
TSC22D1	4.87884e-109	0.341362	0.299	0.218	8.82339e-105
JMJD1C	1.37775e-108	-1.58004	0.022	0.057	2.49166e-104
CACNA1I	6.34716e-108	1.00796	0.05	0.02	1.14788e-103
G3BP2	8.19968e-108	0.312551	0.355	0.264	1.48291e-103
CTPS2	1.01093e-107	0.465782	0.113	0.064	1.82826e-103
CHD3	1.17839e-107	0.230853	0.418	0.318	2.13111e-103
ATP6V1A	1.20771e-107	0.311664	0.342	0.255	2.18414e-103
FADS1	2.81681e-107	0.311777	0.291	0.209	5.09421e-103
SLTM	5.42247e-107	-1.18835	0.053	0.097	9.80654e-103
IFT122	6.11972e-107	-3.65794	0.002	0.022	1.10675e-102
POLK	1.30827e-106	-2.44483	0.004	0.027	2.366e-102
SHROOM2	1.7417e-106	0.657695	0.109	0.062	3.14986e-102
PURG	2.76713e-106	0.506961	0.163	0.105	5.00435e-102
SRPK2	4.25718e-106	-1.24461	0.05	0.094	7.69911e-102
DCDC1	6.12995e-106	1.19712	0.038	0.013	1.1086e-101
SPPL2B	6.49736e-106	-1.35456	0.035	0.074	1.17505e-101
GLRA2	8.30835e-106	0.650102	0.102	0.057	1.50257e-101
TMEM9	9.81465e-106	0.363332	0.284	0.206	1.77498e-101
SAMD14	2.56087e-105	-1.8244	0.014	0.043	4.63134e-101
CPE	3.07516e-105	0.248412	0.543	0.444	5.56142e-101
AKAP8L	4.22188e-105	0.39623	0.256	0.182	7.63527e-101
GFRA1	6.44116e-105	-1.03336	0.038	0.078	1.16488e-100
HNRNPH2	7.63742e-105	-1.65222	0.02	0.052	1.38123e-100
C7orf50	1.46242e-104	0.337186	0.272	0.195	2.64478e-100
TMSB4X	1.74817e-104	0.185097	0.858	0.791	3.16157e-100
SLC25A27	2.05439e-104	0.670222	0.099	0.055	3.71537e-100
RTN1	3.1892e-104	0.212992	0.685	0.589	5.76768e-100
ZNF667	1.40717e-103	-2.22674	0.01	0.036	2.54487e-99
GDPD5	2.07842e-103	0.664675	0.095	0.052	3.75882e-99
PHACTR3	2.23634e-103	-1.93624	0.012	0.04	4.04443e-99
DCLK1	2.94973e-103	0.302683	0.42	0.329	5.33459e-99
GRIN2B	4.3215e-103	0.348234	0.216	0.147	7.81543e-99
LRRTM4	8.21227e-103	0.435202	0.18	0.119	1.48519e-98
RAB6B	1.58318e-102	0.304867	0.465	0.37	2.86318e-98
CPNE1	1.6106e-102	0.384953	0.219	0.151	2.91277e-98
GALNT9	1.67914e-102	1.1014	0.047	0.019	3.03672e-98
EEF1A2	4.92017e-102	0.277992	0.45	0.354	8.89812e-98
CADM2	5.09985e-102	0.389385	0.169	0.11	9.22307e-98
FAT1	5.5932e-102	0.582128	0.109	0.063	1.01153e-97
GALNT14	5.73144e-102	1.48306	0.031	0.009	1.03653e-97
HEATR5B	7.43233e-102	-2.87858	0.003	0.022	1.34414e-97
ARL4D	7.45303e-102	-3.3419	0.002	0.021	1.34788e-97
TJP1	7.93362e-102	-3.1458	0.003	0.022	1.43479e-97
TRAP1	9.73966e-102	0.368737	0.215	0.147	1.76142e-97
OGA	1.08708e-101	0.267532	0.534	0.435	1.96599e-97
DLG4	1.83672e-101	0.254176	0.479	0.38	3.3217e-97
COX16	4.14406e-101	0.383177	0.198	0.133	7.49453e-97
DAAM1	4.22684e-101	0.313539	0.325	0.241	7.64424e-97
INAFM1	6.00746e-101	0.5097	0.129	0.078	1.08645e-96
NMNAT2	6.86993e-101	0.293685	0.324	0.24	1.24243e-96
GPRIN2	7.79277e-101	0.616505	0.083	0.044	1.40932e-96
NME2	9.39661e-101	0.425016	0.168	0.11	1.69938e-96
ARX	1.23845e-100	0.298239	0.242	0.169	2.23974e-96
PRKCA	1.4128e-100	0.61415	0.088	0.047	2.55505e-96
JAK2	1.96424e-100	-1.96748	0.011	0.037	3.55234e-96
FGF3	2.17708e-100	-2.10861	0.006	0.029	3.93726e-96
GPC2	4.51829e-100	0.202233	0.5	0.394	8.17133e-96
TIMM22	5.40118e-100	-2.43943	0.005	0.027	9.76804e-96
ADCYAP1	9.13757e-100	-2.644	0.005	0.026	1.65253e-95
HIST1H1B	1.09645e-99	-1.00539	0.095	0.145	1.98293e-95
CDK17	1.45456e-99	0.442211	0.157	0.101	2.63057e-95
KRTCAP2	2.18697e-99	-1.49163	0.023	0.056	3.95514e-95
CHML	3.19337e-99	0.536915	0.122	0.073	5.77522e-95
CHD2	3.4041e-99	0.277375	0.363	0.275	6.15632e-95
IFT80	9.18867e-99	-2.70114	0.004	0.025	1.66177e-94
TSG101	1.12144e-98	0.431252	0.156	0.1	2.02812e-94
GOT2	1.34828e-98	0.391675	0.187	0.125	2.43836e-94
SLC4A3	2.43133e-98	-2.25806	0.008	0.032	4.39707e-94
FAM102B	3.62461e-98	0.66509	0.087	0.047	6.55511e-94
CELF1	4.23146e-98	0.29085	0.332	0.248	7.6526e-94
SSH1	4.73368e-98	-3.25476	0.002	0.02	8.56086e-94
RPGRIP1L	5.36143e-98	-2.56246	0.004	0.025	9.69615e-94
HS3ST2	6.2917e-98	-2.76471	0.004	0.024	1.13785e-93
PPP2R5B	8.45287e-98	0.338229	0.243	0.172	1.5287e-93
KLHL25	1.02532e-97	-2.52869	0.005	0.026	1.85429e-93
ACSL4	1.12057e-97	0.429497	0.188	0.127	2.02656e-93
GDAP1L1	1.47028e-97	0.321777	0.288	0.21	2.659e-93
TNFRSF10B	1.58849e-97	0.480231	0.142	0.09	2.87278e-93
GNL3	2.92104e-97	0.436723	0.183	0.123	5.2827e-93
ITGB8	3.16301e-97	-1.37818	0.028	0.062	5.72029e-93
TRPC4	6.19667e-97	-1.58981	0.021	0.052	1.12067e-92
UNC5D	6.86628e-97	-1.5366	0.02	0.051	1.24177e-92
IFT46	1.10343e-96	-2.36794	0.005	0.026	1.99556e-92
ATOX1	1.11337e-96	-1.27765	0.041	0.079	2.01354e-92
GPC1	2.11537e-96	0.239519	0.348	0.262	3.82564e-92
KCNJ3	3.47395e-96	1.34197	0.033	0.011	6.28264e-92
ZNF558	5.88219e-96	-3.92368	0.002	0.02	1.06379e-91
NRCAM	5.89883e-96	0.289046	0.243	0.172	1.0668e-91
ATP1B2	8.26036e-96	0.402614	0.227	0.161	1.49389e-91
CITED2	9.08275e-96	0.438604	0.137	0.086	1.64261e-91
TMSB15B	1.95476e-95	0.528534	0.096	0.054	3.53518e-91
NAALAD2	2.25252e-95	0.561536	0.101	0.058	4.07369e-91
RANBP17	4.99255e-95	0.473148	0.132	0.082	9.02903e-91
CDH4	7.07311e-95	0.443697	0.13	0.08	1.27917e-90
MMD	1.2674e-94	0.410048	0.179	0.12	2.29209e-90
FRMD4A	1.30835e-94	0.332626	0.188	0.127	2.36614e-90
NPDC1	1.77117e-94	0.261263	0.423	0.332	3.20316e-90
KLF6	2.04824e-94	-1.52331	0.02	0.051	3.70424e-90
ITCH	3.30323e-94	-1.42715	0.026	0.058	5.9739e-90
TUBB2A	4.70953e-94	0.222307	0.619	0.526	8.51719e-90
FSIP2	5.27437e-94	0.746956	0.062	0.03	9.53869e-90
ZDHHC14	7.07938e-94	0.896739	0.054	0.025	1.28031e-89
EIF1B	1.00834e-93	0.282744	0.417	0.328	1.82357e-89
LUC7L	2.81324e-93	0.295327	0.297	0.219	5.08774e-89
DOC2B	5.00513e-93	0.520221	0.105	0.061	9.05178e-89
TMEM169	1.26471e-92	-3.22859	0.002	0.02	2.28723e-88
RFTN1	1.87408e-92	-1.22214	0.024	0.055	3.38928e-88
UPF2	2.07573e-92	-3.20702	0.002	0.019	3.75395e-88
IBTK	3.05849e-92	-1.45201	0.028	0.061	5.53128e-88
ZNF559	3.63235e-92	0.552846	0.122	0.075	6.5691e-88
SLAIN1	4.43376e-92	0.284139	0.263	0.19	8.01845e-88
LAMTOR5	1.17976e-91	-3.1789	0.002	0.019	2.13359e-87
ATP6V1H	2.39958e-91	-1.55954	0.021	0.051	4.33964e-87
IFT52	2.50442e-91	-1.72039	0.018	0.047	4.52924e-87
PTPRU	3.21921e-91	0.828512	0.071	0.037	5.82193e-87
SST	3.69337e-91	0.590404	0.077	0.041	6.67946e-87
LSM14A	4.77058e-91	-3.11165	0.002	0.019	8.6276e-87
SPECC1	4.23565e-90	0.421	0.162	0.107	7.66017e-86
GRIK1	4.7707e-90	1.33621	0.026	0.008	8.62782e-86
EPB41L3	5.617e-90	0.644839	0.089	0.05	1.01583e-85
ADGRB2	1.76872e-89	0.254609	0.346	0.263	3.19873e-85
PRDM16	4.69135e-89	-1.54373	0.014	0.04	8.48431e-85
CRY2	4.77966e-89	0.548175	0.111	0.067	8.64402e-85
GPR27	6.8242e-89	0.373896	0.157	0.103	1.23416e-84
MEST	9.50173e-89	0.227815	0.571	0.475	1.71839e-84
ATP5MC1	9.86543e-89	-1.24081	0.042	0.079	1.78416e-84
HSD17B14	1.28192e-88	-3.09222	0.003	0.021	2.31835e-84
TMEM115	1.71793e-88	-3.09259	0.002	0.019	3.10687e-84
REEP1	1.72298e-88	0.273162	0.294	0.218	3.11602e-84
ABCA5	2.18002e-88	0.558713	0.137	0.088	3.94257e-84
HUNK	2.51753e-88	-3.4899	0.002	0.019	4.55295e-84
LRPAP1	3.21008e-88	0.406216	0.175	0.119	5.80543e-84
TMEM132E	5.03425e-88	0.681416	0.074	0.039	9.10445e-84
IFT27	6.09896e-88	-1.23919	0.046	0.084	1.103e-83
ARL6IP1	6.70507e-88	-1.36004	0.031	0.064	1.21261e-83
DDX6	7.33284e-88	0.246414	0.329	0.248	1.32614e-83
HIPK3	9.07525e-88	0.313302	0.257	0.188	1.64126e-83
TPGS2	1.20033e-87	0.249664	0.335	0.253	2.1708e-83
CNBP	1.30081e-87	0.291591	0.306	0.229	2.35252e-83
GTF2H5	1.34661e-87	0.343973	0.184	0.125	2.43534e-83
OPTN	1.58204e-87	0.408086	0.188	0.13	2.86112e-83
FAM199X	2.13548e-87	0.48433	0.161	0.108	3.86201e-83
TMEM256	2.36269e-87	0.449428	0.128	0.08	4.27292e-83
ATXN7L3B	2.50464e-87	0.239931	0.416	0.328	4.52965e-83
DBP	3.70312e-87	0.633554	0.076	0.041	6.6971e-83
PPDPF	4.12889e-87	0.226032	0.501	0.407	7.4671e-83
PABPC4	5.05983e-87	-2.95775	0.002	0.019	9.15071e-83
TFRC	7.76547e-87	-0.918545	0.106	0.153	1.40438e-82
XPR1	9.15937e-87	0.227711	0.438	0.35	1.65647e-82
INO80E	1.22104e-86	-1.60218	0.017	0.044	2.20825e-82
ISG20L2	1.46103e-86	-2.6303	0.003	0.02	2.64227e-82
INSIG2	1.8195e-86	-1.66128	0.015	0.041	3.29057e-82
OTX2	2.15771e-86	-1.16651	0.023	0.053	3.90222e-82
GUCY1B1	7.6241e-86	0.722681	0.071	0.038	1.37882e-81
SPEG	1.1777e-85	0.557065	0.116	0.072	2.12987e-81
JPT2	1.9747e-85	-2.36781	0.006	0.025	3.57124e-81
TMEM138	2.32847e-85	-1.91563	0.01	0.034	4.21104e-81
CAPN5	3.9323e-85	0.617318	0.089	0.051	7.11157e-81
PPM1K	4.34863e-85	0.480401	0.141	0.092	7.86449e-81
GRB2	5.77799e-85	0.354745	0.174	0.118	1.04495e-80
ATP8A1	6.06817e-85	0.648191	0.084	0.047	1.09743e-80
RAPGEF6	6.94626e-85	0.374446	0.199	0.14	1.25623e-80
FAM110B	1.30446e-84	0.411628	0.129	0.082	2.35911e-80
C1orf21	1.76506e-84	0.46193	0.119	0.074	3.19212e-80
PDK3	2.82794e-84	0.701369	0.065	0.033	5.11432e-80
ZNF263	4.16464e-84	0.583873	0.114	0.071	7.53174e-80
IFNAR2	4.65194e-84	0.667066	0.088	0.051	8.41302e-80
SYN2	5.19188e-84	0.600021	0.076	0.042	9.38952e-80
PNPLA8	5.31048e-84	-2.10234	0.007	0.028	9.60401e-80
NDUFB2	5.95649e-84	0.330223	0.174	0.118	1.07723e-79
TAGLN3	8.593e-84	0.249485	0.239	0.173	1.55404e-79
TLNRD1	1.00863e-83	-2.14525	0.008	0.028	1.8241e-79
CUX1	1.235e-83	0.316194	0.188	0.13	2.23349e-79
ST6GAL2	1.90533e-83	-3.60009	0.001	0.016	3.44578e-79
EDF1	1.99443e-83	0.454344	0.123	0.078	3.60693e-79
SPTBN4	3.85439e-83	0.503418	0.107	0.065	6.97067e-79
EVL	5.56748e-83	0.187346	0.626	0.535	1.00688e-78
MADD	5.57153e-83	0.369801	0.178	0.122	1.00761e-78
GALNT2	5.69027e-83	0.45824	0.143	0.094	1.02909e-78
CRTAP	1.18288e-82	0.349215	0.11	0.067	2.13924e-78
FBXL2	1.53085e-82	-1.92923	0.01	0.033	2.76854e-78
FZD3	1.94191e-82	0.249835	0.284	0.211	3.51195e-78
SERINC1	2.20777e-82	0.189942	0.638	0.546	3.99275e-78
FRY	2.86383e-82	0.347173	0.185	0.128	5.17924e-78
NFE2L1	4.66387e-82	0.347833	0.245	0.18	8.43461e-78
CA11	6.65414e-82	0.359646	0.167	0.114	1.2034e-77
DHX36	6.78706e-82	0.257933	0.353	0.273	1.22744e-77
GNAL	7.19189e-82	0.409049	0.139	0.091	1.30065e-77
TMEM258	8.00455e-82	-3.55768	0.001	0.016	1.44762e-77
CLK1	8.49471e-82	0.345795	0.219	0.158	1.53627e-77
TARBP1	1.16052e-81	0.278492	0.254	0.186	2.09881e-77
SAP30BP	1.25815e-81	-2.06478	0.007	0.027	2.27536e-77
RFX3	3.11514e-81	0.342941	0.204	0.145	5.63373e-77
GART	3.42633e-81	0.436454	0.13	0.084	6.19652e-77
PPP1R17	3.98673e-81	-2.27267	0.006	0.025	7.21e-77
IL1RAPL2	4.5528e-81	2.54318	0.013	0.002	8.23374e-77
GFRA2	5.31237e-81	0.550194	0.09	0.052	9.60743e-77
IGF1R	7.48761e-81	-1.55726	0.021	0.048	1.35413e-76
MED14	9.0474e-81	0.638172	0.09	0.053	1.63622e-76
FNBP1L	9.17308e-81	0.192762	0.455	0.361	1.65895e-76
HSPA1A	1.06949e-80	-3.39115	0.002	0.016	1.93417e-76
SPAST	1.45866e-80	0.23819	0.285	0.212	2.63799e-76
FAM3C	1.50654e-80	0.280846	0.269	0.199	2.72457e-76
USP10	1.51895e-80	0.436079	0.144	0.095	2.74701e-76
YPEL3	2.65392e-80	0.39127	0.164	0.111	4.79961e-76
AK1	2.72595e-80	-1.13029	0.051	0.087	4.92988e-76
MAPK1IP1L	3.38596e-80	0.28585	0.229	0.165	6.1235e-76
EPB41L5	4.66198e-80	0.407935	0.159	0.108	8.4312e-76
PHF3	5.16465e-80	-1.30111	0.028	0.058	9.34027e-76
NTRK2	5.50823e-80	0.401402	0.152	0.102	9.96163e-76
UVRAG	6.14816e-80	0.483849	0.085	0.048	1.11189e-75
IGSF1	8.41696e-80	1.21856	0.034	0.013	1.52221e-75
MINAR1	8.67071e-80	0.947073	0.042	0.018	1.5681e-75
LARP1	1.47574e-79	-1.77859	0.013	0.036	2.66887e-75
STARD3NL	1.73376e-79	-0.904628	0.08	0.123	3.1355e-75
CRABP2	1.81178e-79	0.54724	0.068	0.036	3.27661e-75
FTH1	2.07592e-79	0.170539	0.68	0.595	3.7543e-75
EFNA5	2.25969e-79	-0.882387	0.049	0.085	4.08666e-75
ST7L	2.38885e-79	-2.81126	0.002	0.018	4.32024e-75
ST5	2.65584e-79	-2.31343	0.004	0.022	4.80308e-75
PHF1	2.7371e-79	-1.1015	0.052	0.089	4.95004e-75
SLC16A9	2.75843e-79	0.3563	0.164	0.112	4.98862e-75
SUB1	3.01391e-79	0.577735	0.097	0.058	5.45065e-75
DSCAML1	3.22484e-79	0.712952	0.059	0.03	5.83212e-75
SOX5	3.38695e-79	-1.08297	0.037	0.071	6.1253e-75
NRGN	1.20487e-78	0.493618	0.104	0.064	2.17901e-74
RIOK3	1.37236e-78	0.389424	0.163	0.111	2.48192e-74
JAK1	1.53101e-78	-2.22634	0.006	0.024	2.76883e-74
GALNT11	1.70206e-78	0.376941	0.161	0.11	3.07818e-74
MEF2D	1.85242e-78	0.408896	0.133	0.087	3.35011e-74
ZNF467	2.60172e-78	0.569759	0.067	0.036	4.70521e-74
PPFIBP1	3.34723e-78	0.623012	0.087	0.051	6.05347e-74
TSPAN7	5.9439e-78	0.266193	0.324	0.25	1.07495e-73
WSB1	5.95378e-78	0.130018	0.786	0.702	1.07674e-73
SDC2	7.00252e-78	-1.23565	0.024	0.052	1.26641e-73
PPP3CB	7.23821e-78	0.22811	0.357	0.279	1.30903e-73
LARS	8.08974e-78	0.313607	0.182	0.127	1.46303e-73
LMBRD1	8.46727e-78	0.334396	0.178	0.124	1.53131e-73
FGD1	1.55331e-77	-1.93757	0.01	0.031	2.80916e-73
TM9SF3	1.77604e-77	-0.777165	0.153	0.2	3.21197e-73
CCSAP	1.84066e-77	0.340916	0.173	0.12	3.32883e-73
PSD	1.98476e-77	0.229995	0.337	0.26	3.58944e-73
CHRM1	2.12201e-77	1.06437	0.029	0.01	3.83766e-73
RAB11FIP4	2.85202e-77	0.391462	0.128	0.083	5.15788e-73
CAMK2A	3.18579e-77	0.473124	0.11	0.069	5.7615e-73
AP5M1	3.59018e-77	0.402717	0.151	0.102	6.49284e-73
DOCK3	5.02784e-77	0.42683	0.113	0.071	9.09284e-73
PLEC	5.44892e-77	-2.85727	0.001	0.015	9.85436e-73
LRP8	9.85255e-77	0.243291	0.244	0.178	1.78183e-72
MOAP1	1.22257e-76	0.254923	0.247	0.181	2.21102e-72
NF1	1.24099e-76	0.33844	0.183	0.129	2.24434e-72
RNF141	1.40656e-76	0.291734	0.201	0.142	2.54376e-72
KBTBD6	1.42881e-76	0.521362	0.104	0.064	2.58401e-72
HSPB1	1.54973e-76	-1.1549	0.043	0.077	2.8027e-72
PHLDA1	1.67128e-76	0.507782	0.09	0.054	3.02251e-72
SOCS5	2.07583e-76	-2.17529	0.006	0.025	3.75414e-72
BEGAIN	2.35828e-76	-2.52665	0.004	0.021	4.26494e-72
ZNF25	2.72616e-76	0.384409	0.163	0.112	4.93027e-72
AMFR	3.28268e-76	-0.952066	0.067	0.106	5.93672e-72
GYG2	3.38355e-76	1.0098	0.043	0.019	6.11916e-72
UBE3B	3.38522e-76	-2.50031	0.004	0.021	6.12216e-72
RHOB	4.94992e-76	0.286638	0.231	0.169	8.95194e-72
HCN3	5.06502e-76	-1.23769	0.039	0.071	9.16008e-72
COL4A2	5.38531e-76	0.419539	0.122	0.079	9.73933e-72
TTC9B	5.40686e-76	0.306328	0.197	0.14	9.77831e-72
GRIK5	6.60945e-76	0.238796	0.244	0.178	1.19532e-71
PNMA2	7.08309e-76	-0.695008	0.162	0.209	1.28098e-71
SOGA1	8.68026e-76	0.260087	0.288	0.218	1.56982e-71
SOWAHA	1.02319e-75	1.03579	0.038	0.016	1.85044e-71
MFSD8	1.04828e-75	0.401332	0.124	0.08	1.89582e-71
HSPBP1	1.08657e-75	-1.97369	0.009	0.03	1.96506e-71
GABRA5	1.1376e-75	0.894441	0.047	0.022	2.05734e-71
BTBD2	1.6187e-75	0.231587	0.31	0.237	2.92742e-71
PRKX	1.62077e-75	1.12523	0.032	0.012	2.93116e-71
RNF41	1.73284e-75	0.351134	0.139	0.092	3.13384e-71
JRK	1.78782e-75	-2.98327	0.002	0.017	3.23328e-71
KDM6A	1.9162e-75	0.758769	0.062	0.033	3.46544e-71
SAMD5	2.11273e-75	-1.40965	0.021	0.047	3.82087e-71
NCS1	2.11398e-75	0.218958	0.335	0.259	3.82313e-71
C1orf54	2.49865e-75	-3.36708	0.002	0.016	4.5188e-71
ZFX	2.88267e-75	0.932473	0.046	0.022	5.2133e-71
MDH2	3.39196e-75	0.353215	0.149	0.1	6.13436e-71
SYT7	4.79659e-75	0.428882	0.133	0.088	8.67462e-71
THY1	4.96146e-75	0.378082	0.151	0.102	8.97281e-71
FRMD3	4.97874e-75	0.996914	0.041	0.018	9.00405e-71
ALDH2	9.26634e-75	0.394747	0.154	0.105	1.67582e-70
CDK14	1.01951e-74	0.347198	0.139	0.092	1.84379e-70
AURKAIP1	1.4392e-74	-1.15153	0.043	0.076	2.60279e-70
HTT	1.44644e-74	-1.44752	0.019	0.044	2.61589e-70
SKIL	1.78578e-74	0.303479	0.189	0.134	3.22959e-70
VSTM2L	1.94588e-74	0.313964	0.161	0.11	3.51913e-70
ZNF146	2.58837e-74	0.314627	0.206	0.149	4.68107e-70
ST7	2.60122e-74	-1.26572	0.032	0.062	4.70431e-70
COL6A1	2.62985e-74	0.335691	0.193	0.138	4.75609e-70
TMEM229B	3.02663e-74	0.590538	0.07	0.039	5.47366e-70
GRK3	3.09299e-74	0.324502	0.174	0.121	5.59367e-70
ABCA2	3.39804e-74	0.372272	0.141	0.095	6.14536e-70
TLN2	3.80745e-74	-3.59997	0.001	0.014	6.88577e-70
MTA1	4.03185e-74	0.248912	0.284	0.215	7.29161e-70
CHRDL1	4.17746e-74	1.00921	0.038	0.016	7.55494e-70
CACNG5	5.12552e-74	1.43014	0.024	0.007	9.2695e-70
GPATCH2L	5.33068e-74	0.268333	0.239	0.176	9.64053e-70
KIAA1324L	6.18676e-74	0.406375	0.141	0.095	1.11888e-69
ZNF445	8.28718e-74	0.332328	0.182	0.128	1.49874e-69
TTC17	9.09558e-74	0.417653	0.158	0.109	1.64494e-69
RIF1	2.0171e-73	0.498061	0.102	0.064	3.64792e-69
RIMS3	2.09686e-73	0.404332	0.142	0.095	3.79218e-69
PAM	2.15043e-73	-0.845342	0.094	0.137	3.88906e-69
ITSN1	2.25282e-73	-1.35212	0.025	0.052	4.07422e-69
DMAC1	2.39373e-73	0.478293	0.11	0.07	4.32906e-69
KCNJ9	3.18618e-73	0.556405	0.073	0.041	5.76221e-69
EMX2	3.63945e-73	-1.32417	0.018	0.043	6.58194e-69
SCGN	4.02806e-73	-1.70808	0.013	0.035	7.28474e-69
GET1	4.31542e-73	0.219544	0.311	0.238	7.80444e-69
ATP1B1	4.73181e-73	0.287215	0.229	0.169	8.55748e-69
CACNA2D3	6.13053e-73	0.500021	0.08	0.046	1.10871e-68
UBXN6	1.15752e-72	0.285262	0.207	0.149	2.09338e-68
PPM1A	1.29411e-72	0.282067	0.228	0.167	2.3404e-68
HIST1H4C	1.50774e-72	0.299178	0.16	0.11	2.72676e-68
PCDHGA3	1.5686e-72	-2.72277	0.003	0.018	2.83681e-68
BBC3	2.02004e-72	0.568074	0.126	0.084	3.65325e-68
FUNDC1	2.04526e-72	0.779669	0.054	0.027	3.69885e-68
RIPOR1	2.70119e-72	0.26788	0.167	0.116	4.88511e-68
CAPZB	3.63847e-72	0.259479	0.256	0.191	6.58017e-68
GPM6B	3.91752e-72	0.347624	0.237	0.178	7.08483e-68
CEBPG	4.44519e-72	0.363058	0.159	0.11	8.03913e-68
GATAD1	4.50884e-72	0.425452	0.127	0.083	8.15425e-68
EPHA6	4.96602e-72	0.985635	0.038	0.017	8.98105e-68
RTL5	6.16059e-72	-1.90002	0.006	0.024	1.11414e-67
FLCN	7.75502e-72	-3.81316	0.001	0.014	1.40249e-67
ANKRD46	7.88151e-72	0.265177	0.251	0.188	1.42537e-67
LRRC4B	8.64261e-72	0.200191	0.428	0.344	1.56302e-67
SEMA5B	9.96744e-72	0.676538	0.052	0.026	1.80261e-67
RNF5	1.19099e-71	0.192844	0.278	0.209	2.1539e-67
IFNAR1	2.06081e-71	-1.31353	0.028	0.056	3.72697e-67
MSL1	2.28779e-71	0.358838	0.156	0.107	4.13746e-67
RGS7BP	2.58767e-71	0.684783	0.065	0.035	4.6798e-67
EIF3H	2.95847e-71	0.373768	0.148	0.101	5.3504e-67
ARHGDIG	3.10297e-71	0.234385	0.245	0.182	5.61173e-67
PACSIN1	3.75461e-71	1.05974	0.031	0.012	6.79021e-67
FGD4	4.2181e-71	-2.27807	0.003	0.018	7.62844e-67
CNN2	4.93143e-71	0.449977	0.121	0.079	8.9185e-67
NSF	5.0855e-71	0.228805	0.248	0.185	9.19713e-67
RTF1	7.01675e-71	0.25277	0.262	0.197	1.26898e-66
ZSWIM6	8.89081e-71	0.30477	0.154	0.106	1.6079e-66
ABI2	1.37617e-70	0.211974	0.373	0.295	2.4888e-66
SAP30L	1.74072e-70	-2.74056	0.002	0.016	3.1481e-66
GPRASP1	3.07385e-70	0.344576	0.144	0.098	5.55906e-66
CHMP5	3.19726e-70	0.343552	0.165	0.116	5.78225e-66
NDUFB5	3.35936e-70	0.315034	0.178	0.126	6.0754e-66
GPR12	5.07724e-70	0.501871	0.082	0.049	9.18219e-66
R3HDM2	5.27387e-70	-1.23299	0.026	0.053	9.5378e-66
TIMMDC1	6.08113e-70	-2.13067	0.008	0.026	1.09977e-65
DCTN2	7.26663e-70	0.246518	0.322	0.251	1.31417e-65
HGS	7.28841e-70	-0.99448	0.054	0.088	1.31811e-65
NDUFA6	8.18722e-70	0.536904	0.082	0.049	1.48066e-65
KSR1	8.46325e-70	0.476547	0.116	0.075	1.53058e-65
KCNN1	1.23226e-69	-3.45213	0.001	0.013	2.22854e-65
REV1	1.31778e-69	-1.34633	0.024	0.05	2.38321e-65
USP16	1.38867e-69	-1.99228	0.008	0.027	2.51141e-65
COL6A2	1.75135e-69	1.43632	0.022	0.007	3.16732e-65
MAB21L1	2.1667e-69	1.83365	0.016	0.004	3.91848e-65
COL25A1	2.17819e-69	0.845327	0.047	0.023	3.93925e-65
RAB3C	2.21706e-69	0.336526	0.193	0.14	4.00955e-65
TMCC1	2.88749e-69	-2.44798	0.004	0.02	5.22202e-65
RNF4	2.98589e-69	0.390649	0.111	0.071	5.39998e-65
IGF2BP1	2.98781e-69	-1.39898	0.026	0.053	5.40345e-65
MPHOSPH9	3.38762e-69	0.422344	0.121	0.08	6.12651e-65
ZNF285	3.89174e-69	-1.41098	0.032	0.06	7.03821e-65
GOLGA3	4.47984e-69	-1.09616	0.047	0.08	8.10178e-65
ZBTB44	4.48563e-69	0.383903	0.162	0.114	8.11226e-65
KLHDC10	4.97411e-69	-0.923213	0.085	0.124	8.99567e-65
DAZAP1	5.41876e-69	0.490791	0.096	0.059	9.79983e-65
ZYX	5.50475e-69	0.2553	0.199	0.144	9.95534e-65
TMEM68	7.13663e-69	0.326872	0.196	0.142	1.29066e-64
COX6A1	8.00989e-69	0.221384	0.25	0.187	1.44859e-64
HSPD1	1.32394e-68	0.300554	0.189	0.136	2.39434e-64
TMF1	1.47027e-68	0.339755	0.179	0.128	2.65898e-64
TERF2	1.47146e-68	-1.45806	0.019	0.043	2.66114e-64
RIPOR2	1.60294e-68	0.257063	0.211	0.154	2.89891e-64
ATP13A3	1.65947e-68	0.346094	0.138	0.094	3.00116e-64
RNF10	1.7063e-68	0.255409	0.26	0.197	3.08584e-64
SLITRK6	2.88461e-68	-0.739487	0.094	0.135	5.21683e-64
GNL1	3.5602e-68	0.319406	0.155	0.107	6.43863e-64
CDH12	4.71161e-68	-2.33234	0.005	0.021	8.52094e-64
CDK5R1	4.86917e-68	0.165694	0.466	0.38	8.80589e-64
ELMO1	5.0695e-68	0.414148	0.103	0.065	9.16819e-64
HSF4	5.48712e-68	0.64154	0.057	0.03	9.92345e-64
DDN	6.85719e-68	1.30695	0.023	0.008	1.24012e-63
UBA2	7.39013e-68	-1.05253	0.049	0.082	1.33651e-63
SBK1	7.47267e-68	0.163123	0.613	0.523	1.35143e-63
TMEM141	8.08642e-68	-2.14691	0.006	0.023	1.46243e-63
TOMM70	8.42063e-68	0.256554	0.182	0.13	1.52287e-63
GOLGA7	9.88665e-68	0.256825	0.178	0.126	1.788e-63
TMSB4Y	1.02512e-67	-11.5162	0	0.011	1.85393e-63
AKIRIN2	2.19835e-67	0.214137	0.296	0.228	3.97572e-63
PJA1	3.00087e-67	0.225814	0.239	0.179	5.42708e-63
RSL24D1	3.73597e-67	0.541556	0.08	0.047	6.7565e-63
TRAPPC4	3.76504e-67	0.259074	0.234	0.174	6.80908e-63
ADAMTS2	3.84668e-67	1.30828	0.023	0.007	6.95673e-63
GOLGA7B	5.20685e-67	0.408297	0.114	0.075	9.41658e-63
RNF138	6.28539e-67	0.355377	0.127	0.085	1.13671e-62
HELZ	6.38825e-67	-1.11352	0.035	0.064	1.15531e-62
RCAN3	9.7847e-67	0.316052	0.152	0.105	1.76956e-62
GALNT1	1.09635e-66	0.230675	0.165	0.115	1.98275e-62
UGCG	1.32485e-66	0.274044	0.197	0.143	2.39599e-62
UBE2E2	1.33301e-66	0.507597	0.085	0.051	2.41075e-62
GAB2	1.33397e-66	0.352689	0.122	0.081	2.41248e-62
SCAMP1	1.42158e-66	0.243968	0.282	0.217	2.57092e-62
GRAMD4	2.41031e-66	0.398314	0.101	0.064	4.35904e-62
TNPO2	2.4278e-66	0.197387	0.392	0.314	4.39067e-62
GPR26	2.648e-66	0.652291	0.057	0.03	4.78891e-62
BACH1	3.04419e-66	0.230046	0.255	0.193	5.50541e-62
ROBO1	3.19107e-66	0.16854	0.39	0.308	5.77104e-62
AASDHPPT	3.26702e-66	0.217046	0.355	0.281	5.90841e-62
SPHKAP	4.1006e-66	0.726977	0.046	0.023	7.41594e-62
SNTG1	5.68675e-66	0.610218	0.066	0.037	1.02845e-61
PKD1	5.73019e-66	0.305338	0.191	0.139	1.03631e-61
ZEB1	5.87168e-66	0.234929	0.228	0.169	1.06189e-61
CADM3	6.10932e-66	0.208716	0.317	0.247	1.10487e-61
NECAP1	6.1217e-66	0.261454	0.242	0.182	1.10711e-61
HES5	6.89985e-66	-0.765425	0.074	0.111	1.24784e-61
CTBP2	9.25569e-66	0.339124	0.135	0.092	1.67389e-61
RNH1	1.51746e-65	0.324581	0.15	0.104	2.74433e-61
SLC43A2	1.67193e-65	0.26067	0.19	0.137	3.02369e-61
MEIS2	1.80485e-65	0.11473	0.678	0.582	3.26406e-61
UQCRB	1.89046e-65	0.300659	0.155	0.108	3.41889e-61
SH2D3C	2.02912e-65	0.597159	0.077	0.046	3.66966e-61
GUCY1A1	2.09434e-65	0.461418	0.074	0.043	3.78761e-61
MTPAP	4.28307e-65	0.300946	0.196	0.144	7.74593e-61
CHMP2A	4.33453e-65	0.26849	0.216	0.159	7.839e-61
MAP7D1	5.34732e-65	0.187593	0.305	0.235	9.67063e-61
JADE1	5.4876e-65	-1.71444	0.009	0.027	9.92432e-61
GALNT16	5.55819e-65	0.527368	0.082	0.05	1.0052e-60
VGF	5.7861e-65	-0.726072	0.166	0.209	1.04642e-60
SLC25A1	5.79549e-65	0.410953	0.125	0.084	1.04811e-60
CBFA2T3	5.97641e-65	0.399857	0.088	0.054	1.08083e-60
NMBR	8.61946e-65	1.23329	0.024	0.008	1.55883e-60
RGS7	1.05141e-64	0.544083	0.065	0.036	1.90147e-60
TMEM170A	1.12756e-64	-3.33081	0.001	0.013	2.03919e-60
G6PD	1.16781e-64	0.553923	0.075	0.045	2.11199e-60
FAM49A	1.30298e-64	0.326897	0.146	0.101	2.35644e-60
FXYD6	1.37317e-64	0.159582	0.646	0.561	2.48338e-60
SIPA1L2	1.5462e-64	0.535737	0.073	0.043	2.79631e-60
MT-ND6	2.34489e-64	-0.374129	0.436	0.467	4.24073e-60
THRAP3	3.0093e-64	0.283554	0.197	0.144	5.44232e-60
COPZ1	3.17483e-64	0.386071	0.134	0.092	5.74167e-60
NTM	3.4964e-64	0.519932	0.084	0.051	6.32324e-60
DEAF1	3.72469e-64	0.218835	0.226	0.168	6.7361e-60
DAP3	4.10077e-64	0.299308	0.165	0.117	7.41624e-60
NIPAL3	5.32816e-64	0.545392	0.074	0.044	9.63597e-60
TMEM65	6.22129e-64	0.273897	0.151	0.105	1.12512e-59
GTF2IRD1	6.8322e-64	-1.37616	0.019	0.041	1.2356e-59
DRAM2	7.32741e-64	0.433924	0.101	0.065	1.32516e-59
BSG	8.15106e-64	0.329562	0.164	0.116	1.47412e-59
PHPT1	1.28319e-63	0.190832	0.393	0.317	2.32064e-59
NECTIN1	1.39258e-63	0.215395	0.222	0.164	2.51848e-59
MYC	1.61732e-63	0.474657	0.072	0.043	2.92491e-59
INSIG1	1.62295e-63	-1.20714	0.021	0.045	2.9351e-59
ATL2	1.9691e-63	0.419893	0.121	0.082	3.56111e-59
PPFIA3	2.02564e-63	0.47518	0.108	0.071	3.66336e-59
ASIC1	2.09916e-63	0.41002	0.107	0.069	3.79633e-59
PPP3R1	2.25926e-63	0.19973	0.312	0.244	4.08587e-59
GRIK3	2.43947e-63	0.265095	0.153	0.107	4.41178e-59
CHERP	2.67897e-63	0.341074	0.169	0.121	4.84491e-59
IGSF9B	2.70942e-63	0.395037	0.119	0.08	4.89999e-59
GATAD2A	4.26976e-63	0.506634	0.086	0.054	7.72187e-59
PDHA1	4.3222e-63	0.220622	0.242	0.182	7.8167e-59
TNPO3	4.73435e-63	0.253913	0.235	0.177	8.56207e-59
MAPK8	4.80975e-63	0.254345	0.239	0.181	8.69844e-59
CHTOP	4.86227e-63	0.217667	0.256	0.195	8.79342e-59
PANK3	5.03201e-63	0.246804	0.261	0.201	9.10039e-59
VDAC3	5.41625e-63	0.296611	0.231	0.175	9.79528e-59
ANKRD13B	5.7147e-63	0.225031	0.226	0.169	1.0335e-58
G2E3	6.54998e-63	0.454846	0.09	0.056	1.18456e-58
ZNF121	7.71056e-63	0.364488	0.131	0.089	1.39446e-58
CNTNAP4	8.07945e-63	0.729103	0.066	0.038	1.46117e-58
LPCAT1	9.44854e-63	0.317952	0.159	0.113	1.70877e-58
NBL1	9.70085e-63	0.45702	0.076	0.046	1.7544e-58
PPP1R21	1.07996e-62	-2.36067	0.005	0.021	1.95311e-58
UXT	1.13652e-62	0.32639	0.142	0.099	2.0554e-58
GDAP2	1.36392e-62	0.398125	0.122	0.082	2.46665e-58
PCMTD1	1.49155e-62	0.218491	0.273	0.209	2.69746e-58
ARMCX6	1.51665e-62	-2.64188	0.003	0.016	2.74286e-58
ARHGEF7	1.64413e-62	0.207365	0.283	0.218	2.97341e-58
SLC1A2	2.01286e-62	0.280853	0.186	0.135	3.64026e-58
ZNF333	2.02721e-62	0.395384	0.108	0.071	3.66621e-58
ISOC1	2.11873e-62	-2.40512	0.004	0.018	3.83173e-58
ADGRB1	2.16e-62	0.284344	0.164	0.117	3.90636e-58
ABAT	2.46571e-62	0.211007	0.27	0.206	4.45925e-58
APBB3	4.10218e-62	0.226413	0.198	0.145	7.41879e-58
TMEM106B	4.51503e-62	-1.15669	0.029	0.055	8.16543e-58
TAF15	5.03792e-62	0.24449	0.16	0.113	9.11108e-58
EPS15	5.48213e-62	0.401604	0.146	0.103	9.91444e-58
CCDC50	6.05827e-62	-1.26881	0.027	0.053	1.09564e-57
TMEM74	6.42419e-62	0.749796	0.043	0.021	1.16181e-57
SLITRK2	7.53274e-62	-2.73267	0.002	0.015	1.3623e-57
MACO1	8.49159e-62	0.32276	0.157	0.111	1.5357e-57
HM13	8.50032e-62	0.275772	0.165	0.117	1.53728e-57
GNB4	8.67869e-62	0.328139	0.109	0.072	1.56954e-57
ATP5MG	9.91355e-62	0.235143	0.237	0.179	1.79287e-57
RNF20	1.05032e-61	0.412156	0.107	0.071	1.89951e-57
TMEM135	1.05587e-61	-2.99499	0.001	0.013	1.90955e-57
SLC25A4	1.07732e-61	0.205484	0.234	0.175	1.94834e-57
SYNDIG1	1.39257e-61	1.23215	0.02	0.007	2.51846e-57
KMT5C	1.45761e-61	-1.95031	0.005	0.02	2.63609e-57
BIN1	1.60741e-61	0.227995	0.257	0.197	2.907e-57
CNOT9	1.72167e-61	0.292158	0.208	0.155	3.11363e-57
GRINA	2.13166e-61	0.161902	0.328	0.258	3.85512e-57
RNF8	2.75505e-61	0.428125	0.101	0.065	4.98251e-57
FRMPD4	3.03158e-61	1.57211	0.018	0.005	5.48261e-57
CLSTN1	3.1703e-61	0.18215	0.388	0.312	5.73349e-57
CRYZ	3.57665e-61	-2.48647	0.004	0.019	6.46838e-57
ABRAXAS2	3.87415e-61	-2.97397	0.001	0.013	7.00639e-57
TMEM8B	3.99519e-61	0.218157	0.268	0.207	7.22531e-57
TAF1D	4.00155e-61	0.416838	0.131	0.09	7.2368e-57
COX7C	4.0242e-61	0.210568	0.31	0.243	7.27776e-57
DICER1	4.36342e-61	0.201745	0.234	0.176	7.89124e-57
RFK	4.51868e-61	-2.17561	0.004	0.019	8.17204e-57
ISLR2	5.71964e-61	-0.29156	0.543	0.559	1.0344e-56
ST8SIA2	6.56797e-61	-0.947398	0.057	0.09	1.18782e-56
PPA2	7.55334e-61	0.495038	0.072	0.043	1.36602e-56
ATP1A1	8.39977e-61	0.31409	0.151	0.106	1.5191e-56
PEG10	8.44246e-61	-0.219533	0.721	0.719	1.52682e-56
LRIF1	9.77801e-61	0.338344	0.106	0.069	1.76835e-56
PSMD13	1.55476e-60	0.267034	0.217	0.163	2.81179e-56
ATP6AP1L	1.8175e-60	-3.37986	0.001	0.013	3.28695e-56
RND2	1.8728e-60	0.355954	0.124	0.084	3.38696e-56
DCTPP1	2.43666e-60	0.421089	0.098	0.063	4.4067e-56
PABPC5	2.55689e-60	0.98412	0.03	0.012	4.62414e-56
FBL	3.04962e-60	-2.19859	0.005	0.02	5.51523e-56
CGREF1	3.55187e-60	0.388926	0.092	0.058	6.42355e-56
TBL1X	4.05833e-60	0.734897	0.043	0.021	7.33948e-56
ST8SIA3	4.16468e-60	-1.04635	0.042	0.071	7.53182e-56
VAT1	4.24598e-60	-0.585157	0.196	0.237	7.67886e-56
SLC9B2	4.34991e-60	0.325057	0.108	0.071	7.86681e-56
ARL5A	4.60533e-60	-3.45439	0.001	0.012	8.32875e-56
NETO2	4.62922e-60	0.332587	0.108	0.071	8.37195e-56
CA5B	4.66839e-60	1.02196	0.035	0.016	8.44279e-56
GTPBP1	5.01715e-60	0.310142	0.18	0.131	9.07352e-56
ZDHHC2	5.12987e-60	0.440965	0.079	0.048	9.27737e-56
NDUFA1	5.77459e-60	0.202518	0.193	0.141	1.04434e-55
FASN	6.10283e-60	0.200968	0.371	0.299	1.1037e-55
GALT	6.65503e-60	0.276849	0.15	0.106	1.20356e-55
GFM1	6.83963e-60	0.30462	0.126	0.086	1.23695e-55
NTNG1	8.97515e-60	1.06633	0.028	0.012	1.62316e-55
GNPTAB	1.01358e-59	0.23702	0.189	0.138	1.83306e-55
CDKN2D	1.08677e-59	0.207225	0.309	0.243	1.96543e-55
PODXL2	1.2284e-59	0.173485	0.328	0.259	2.22156e-55
TNKS1BP1	1.40518e-59	0.407136	0.098	0.063	2.54127e-55
SLC16A14	1.80214e-59	0.279573	0.156	0.111	3.25918e-55
HMGN3	1.94515e-59	-1.0335	0.046	0.076	3.5178e-55
ADGRG1	2.07876e-59	-0.643539	0.146	0.187	3.75943e-55
GID8	2.4947e-59	0.372809	0.134	0.093	4.51167e-55
ZNF397	3.26437e-59	0.266189	0.184	0.135	5.90361e-55
SPAG16	3.79567e-59	0.325531	0.139	0.097	6.86447e-55
ITSN2	4.32041e-59	-3.21422	0.001	0.012	7.81346e-55
NR2F1	4.48675e-59	1.21991	0.024	0.009	8.11428e-55
FNDC4	4.95478e-59	-2.58438	0.003	0.015	8.96071e-55
NTSR1	5.49461e-59	0.814127	0.032	0.014	9.937e-55
LRRC41	8.03949e-59	0.277739	0.171	0.124	1.45394e-54
CHAC1	8.06963e-59	0.950904	0.037	0.018	1.45939e-54
CTIF	9.10305e-59	0.193235	0.267	0.206	1.64629e-54
JUP	9.69066e-59	-1.33064	0.02	0.042	1.75256e-54
ZXDC	1.03429e-58	0.383799	0.125	0.086	1.87051e-54
DROSHA	1.1279e-58	0.23189	0.18	0.131	2.03981e-54
EIF4B	1.15237e-58	0.266158	0.154	0.11	2.08406e-54
AZIN1	1.19456e-58	-0.775195	0.105	0.142	2.16036e-54
DNAJC18	1.32303e-58	0.346551	0.152	0.108	2.39269e-54
RAB1A	1.79999e-58	-1.33738	0.022	0.045	3.25529e-54
GNA13	2.03529e-58	0.39874	0.122	0.084	3.68082e-54
COMMD6	2.32332e-58	0.235779	0.183	0.134	4.20173e-54
ZIC4	2.47473e-58	-1.08498	0.022	0.045	4.47555e-54
MACROD1	3.40384e-58	0.508206	0.075	0.046	6.15584e-54
PIK3R1	4.1203e-58	-1.38428	0.018	0.039	7.45156e-54
DUSP16	5.4156e-58	0.356609	0.141	0.099	9.79411e-54
ZNF639	8.55162e-58	0.291316	0.144	0.102	1.54656e-53
JRKL	9.45362e-58	-2.96005	0.001	0.012	1.70969e-53
ZNF148	1.14116e-57	0.271544	0.189	0.139	2.06378e-53
MYO18A	1.2208e-57	0.254681	0.177	0.129	2.20782e-53
ZNF706	1.31424e-57	0.453098	0.093	0.06	2.37681e-53
C1orf61	1.40346e-57	-1.05114	0.028	0.053	2.53816e-53
CAPRIN1	1.6539e-57	0.268337	0.189	0.14	2.99108e-53
KANSL1	1.84111e-57	-0.990178	0.036	0.063	3.32965e-53
GABRA2	2.04536e-57	0.311146	0.127	0.087	3.69904e-53
DENND5B	2.06696e-57	0.269505	0.154	0.11	3.7381e-53
ARPP21	2.09307e-57	0.380542	0.106	0.071	3.78531e-53
SALL1	2.3015e-57	0.409162	0.089	0.057	4.16226e-53
CYTH1	2.79968e-57	0.30744	0.122	0.084	5.06323e-53
CMTM4	3.36879e-57	0.371913	0.115	0.078	6.09246e-53
FAR1	3.61165e-57	0.259484	0.166	0.121	6.53167e-53
RAB5A	3.61667e-57	0.326162	0.15	0.107	6.54075e-53
NCAN	3.85765e-57	0.134136	0.356	0.283	6.97656e-53
GPBP1	3.97487e-57	0.235595	0.251	0.193	7.18856e-53
TAFA5	4.17772e-57	0.342908	0.124	0.085	7.5554e-53
RLIM	4.31208e-57	0.464973	0.077	0.048	7.79839e-53
ADCY1	4.36249e-57	0.353931	0.136	0.095	7.88957e-53
MTSS2	4.85349e-57	0.232899	0.2	0.149	8.77754e-53
PER1	5.18393e-57	0.511602	0.095	0.062	9.37513e-53
ATP11A	5.34825e-57	-1.55583	0.011	0.028	9.67231e-53
CDK2AP1	7.77972e-57	-1.42712	0.017	0.038	1.40696e-52
GOLT1B	8.73431e-57	0.253802	0.174	0.127	1.5796e-52
ZNF441	9.57631e-57	0.374657	0.1	0.066	1.73188e-52
TUB	9.72246e-57	0.27757	0.169	0.123	1.75831e-52
COX5B	1.04332e-56	0.299884	0.105	0.07	1.88685e-52
CACNA2D2	1.10324e-56	0.233379	0.146	0.104	1.99521e-52
SV2A	1.12958e-56	0.190778	0.282	0.22	2.04285e-52
TMEM150A	1.53122e-56	-3.79369	0.001	0.011	2.76922e-52
CHCHD6	1.55929e-56	0.285165	0.146	0.103	2.81998e-52
CXXC4	1.57445e-56	0.260202	0.166	0.121	2.84739e-52
MT-ND5	1.60569e-56	-0.375493	0.422	0.448	2.9039e-52
DMTN	1.92793e-56	0.308905	0.134	0.094	3.48665e-52
ARMCX3	2.24787e-56	-0.817147	0.093	0.128	4.06528e-52
NKTR	2.25629e-56	0.288667	0.17	0.124	4.08051e-52
ZMAT3	2.5139e-56	0.668579	0.072	0.044	4.54639e-52
HOMER2	2.78447e-56	0.691768	0.039	0.019	5.03572e-52
EMD	3.06244e-56	0.237674	0.245	0.188	5.53842e-52
AMN1	3.19828e-56	0.307109	0.149	0.106	5.78409e-52
ARAP3	3.4776e-56	0.875117	0.042	0.022	6.28925e-52
CPEB4	3.657e-56	0.205551	0.249	0.192	6.61369e-52
CWC15	4.80498e-56	0.284808	0.182	0.135	8.6898e-52
GOPC	4.81963e-56	0.400467	0.103	0.069	8.71631e-52
ABRACL	5.09733e-56	0.222647	0.158	0.113	9.21852e-52
HIST1H2BB	5.74732e-56	2.47777	0.01	0.002	1.0394e-51
CAMK2N2	5.8015e-56	0.208289	0.221	0.168	1.0492e-51
DNPEP	5.83722e-56	0.522336	0.065	0.038	1.05566e-51
DCAF7	8.41755e-56	0.170865	0.351	0.281	1.52231e-51
FBXL16	8.62621e-56	-1.1042	0.035	0.061	1.56005e-51
ADH5	8.77612e-56	-1.4428	0.014	0.033	1.58716e-51
NAA15	9.28791e-56	0.29011	0.145	0.103	1.67972e-51
GNL2	9.83908e-56	0.384096	0.113	0.077	1.7794e-51
YWHAE	1.18417e-55	0.18531	0.397	0.324	2.14157e-51
ZNF514	1.47204e-55	0.464282	0.085	0.054	2.66219e-51
TIA1	1.47896e-55	0.177714	0.321	0.254	2.67471e-51
SNX4	1.56699e-55	-0.90607	0.058	0.089	2.83391e-51
RNF217	1.74e-55	0.789331	0.037	0.018	3.1468e-51
RAB2A	2.33626e-55	0.197376	0.323	0.257	4.22512e-51
GRAMD1B	2.56457e-55	0.412694	0.065	0.038	4.63802e-51
USP36	3.35738e-55	0.508032	0.079	0.05	6.07181e-51
CCDC47	3.66909e-55	0.326626	0.143	0.102	6.63556e-51
FCHSD2	5.00343e-55	0.331285	0.111	0.075	9.0487e-51
DGUOK	5.32308e-55	0.182575	0.268	0.208	9.62679e-51
ARFGAP3	5.32817e-55	0.26845	0.177	0.131	9.63599e-51
SMAD9	5.54428e-55	0.514497	0.051	0.028	1.00268e-50
TATDN3	6.18688e-55	0.390402	0.113	0.077	1.1189e-50
TSEN34	6.35323e-55	0.408847	0.082	0.052	1.14898e-50
CARNMT1	7.62194e-55	0.526292	0.062	0.036	1.37843e-50
SEC62	8.37179e-55	0.20026	0.287	0.225	1.51404e-50
MINK1	9.58403e-55	0.278447	0.201	0.152	1.73327e-50
TMSB15A	9.89777e-55	0.164257	0.45	0.371	1.79001e-50
ETF1	1.01819e-54	-2.68746	0.002	0.013	1.84139e-50
GOLGB1	1.11884e-54	0.349039	0.107	0.072	2.02342e-50
TMEM183A	1.19325e-54	0.223718	0.226	0.173	2.158e-50
GLG1	1.22814e-54	0.32491	0.126	0.088	2.22108e-50
KMT2A	1.36748e-54	0.221903	0.235	0.18	2.47309e-50
ZCCHC7	1.52303e-54	0.37465	0.119	0.082	2.7544e-50
DNAH14	1.88389e-54	0.36332	0.103	0.069	3.40701e-50
SLC24A3	1.88648e-54	0.682484	0.041	0.021	3.41169e-50
CALB1	2.10151e-54	-1.42434	0.01	0.026	3.80057e-50
GOT1	2.4753e-54	0.439002	0.081	0.052	4.47657e-50
ZNF141	2.6257e-54	0.318063	0.135	0.095	4.74858e-50
ATP6AP1	2.88174e-54	0.157244	0.332	0.265	5.21163e-50
CCND2	3.01571e-54	0.169021	0.269	0.208	5.4539e-50
GAREM2	3.0447e-54	0.369255	0.094	0.061	5.50634e-50
RAB4A	3.05427e-54	0.320341	0.131	0.092	5.52364e-50
KHDRBS3	3.64833e-54	-1.81665	0.007	0.022	6.598e-50
HTRA2	3.67236e-54	-2.19458	0.005	0.018	6.64146e-50
TMEM161A	4.32802e-54	-2.41882	0.002	0.014	7.82722e-50
SPCS3	4.84709e-54	-1.37938	0.017	0.036	8.76596e-50
ZRSR2	6.53378e-54	1.1511	0.025	0.01	1.18163e-49
WIPF3	6.8923e-54	0.357106	0.109	0.074	1.24647e-49
ZDHHC17	6.94245e-54	0.189758	0.242	0.186	1.25554e-49
WDR86	7.04955e-54	0.445178	0.091	0.059	1.27491e-49
RCOR3	8.89924e-54	-1.32671	0.018	0.038	1.60943e-49
CEBPZ	8.94254e-54	0.336335	0.135	0.095	1.61726e-49
SCARB1	9.13252e-54	0.562228	0.048	0.026	1.65162e-49
LMBRD2	1.02574e-53	0.296387	0.139	0.099	1.85505e-49
DDX24	1.06449e-53	0.198515	0.279	0.219	1.92512e-49
NAA25	1.08367e-53	0.437367	0.098	0.066	1.95981e-49
DTX4	1.09027e-53	0.336776	0.132	0.094	1.97175e-49
ZNF385D	1.26401e-53	0.732067	0.04	0.02	2.28597e-49
DHX15	1.28961e-53	0.231518	0.278	0.219	2.33225e-49
SFXN1	1.48382e-53	0.198888	0.274	0.214	2.68348e-49
SELENOM	1.5542e-53	0.57973	0.067	0.04	2.81076e-49
AHCYL1	1.5805e-53	0.242262	0.167	0.122	2.85834e-49
ZNF704	1.65252e-53	0.413209	0.095	0.063	2.98859e-49
GTF2H4	1.85002e-53	0.256976	0.141	0.101	3.34576e-49
ATP1A3	1.85196e-53	0.146982	0.453	0.375	3.34928e-49
MPP2	1.9672e-53	0.308464	0.133	0.094	3.55768e-49
PTPRM	2.16225e-53	0.475238	0.087	0.057	3.91043e-49
TMCO1	2.42114e-53	-0.760219	0.099	0.134	4.37863e-49
DPYSL5	2.46877e-53	0.138007	0.562	0.48	4.46477e-49
SEPTIN5	2.67363e-53	0.140643	0.515	0.431	4.83526e-49
PBX2	2.71168e-53	0.23264	0.183	0.136	4.90408e-49
MOB4	2.91377e-53	0.246253	0.221	0.169	5.26955e-49
RNF38	3.17053e-53	0.204512	0.263	0.205	5.7339e-49
GGNBP2	3.34854e-53	0.323857	0.11	0.075	6.05583e-49
SEC31A	3.61737e-53	0.172003	0.343	0.276	6.54201e-49
DHPS	4.16931e-53	0.309842	0.156	0.114	7.54019e-49
ZNF12	4.1847e-53	0.453056	0.076	0.047	7.56802e-49
ACBD4	5.03889e-53	0.947639	0.032	0.015	9.11284e-49
RNF103	5.2459e-53	0.320307	0.12	0.084	9.48722e-49
PIP4K2B	6.80231e-53	0.212627	0.266	0.208	1.2302e-48
FNBP4	7.21355e-53	0.252801	0.204	0.155	1.30457e-48
ARSD	7.67812e-53	1.06191	0.022	0.008	1.38859e-48
CCNB1IP1	7.96726e-53	0.435863	0.086	0.056	1.44088e-48
GRIN2D	8.17811e-53	0.285578	0.114	0.078	1.47901e-48
MORF4L2	8.67229e-53	0.294486	0.129	0.091	1.56838e-48
CHRM2	9.2237e-53	1.50091	0.014	0.004	1.66811e-48
FGFR1	9.33354e-53	-1.26284	0.02	0.04	1.68797e-48
ZNF835	9.83072e-53	-2.63051	0.002	0.013	1.77789e-48
CLCN3	1.06853e-52	0.189599	0.226	0.173	1.93243e-48
CLTB	1.17387e-52	0.184871	0.2	0.15	2.12294e-48
CDKN1A	1.28292e-52	0.504654	0.139	0.101	2.32015e-48
FH	1.44953e-52	-1.30119	0.017	0.036	2.62147e-48
DNAJB9	1.44987e-52	0.351145	0.124	0.087	2.62209e-48
CLVS1	1.59487e-52	-3.53587	0.001	0.01	2.88432e-48
TXNIP	1.61756e-52	0.115791	0.365	0.294	2.92535e-48
KLHL5	1.77901e-52	0.243674	0.159	0.116	3.21734e-48
ARPC2	2.00067e-52	0.261409	0.156	0.114	3.61821e-48
CXorf38	3.27494e-52	0.680247	0.061	0.037	5.92273e-48
LYST	3.9713e-52	0.347449	0.125	0.088	7.1821e-48
COLGALT2	4.69062e-52	0.800643	0.033	0.016	8.48299e-48
MARCKS	5.40289e-52	0.131925	0.636	0.557	9.77113e-48
IGBP1	5.8164e-52	0.350158	0.105	0.071	1.0519e-47
SRC	6.53002e-52	-0.906152	0.048	0.075	1.18095e-47
CAB39L	6.59875e-52	0.320977	0.097	0.064	1.19338e-47
TUT4	6.65547e-52	-0.751319	0.086	0.119	1.20364e-47
LGMN	6.76042e-52	0.336379	0.104	0.07	1.22262e-47
TRAPPC11	7.39911e-52	0.265442	0.15	0.109	1.33813e-47
PRMT3	7.48722e-52	0.564832	0.059	0.035	1.35406e-47
SCG2	7.59235e-52	0.228274	0.136	0.097	1.37308e-47
TKFC	7.63827e-52	-2.76723	0.001	0.011	1.38138e-47
TMEM120A	7.69073e-52	-2.99085	0.002	0.012	1.39087e-47
ATP6V1F	7.86031e-52	-0.705486	0.128	0.164	1.42154e-47
TLCD3A	8.1107e-52	-2.98274	0.001	0.011	1.46682e-47
SRA1	8.25194e-52	-0.89482	0.052	0.081	1.49236e-47
DLGAP1	8.67981e-52	0.348509	0.087	0.056	1.56974e-47
TBC1D30	9.48901e-52	0.379634	0.08	0.051	1.71609e-47
PPM1L	1.01943e-51	0.195999	0.179	0.133	1.84365e-47
CAPN2	1.0502e-51	0.322628	0.124	0.087	1.89929e-47
PICALM	1.05856e-51	-0.751083	0.094	0.128	1.91441e-47
SHC1	1.32152e-51	-2.06683	0.005	0.018	2.38996e-47
RTN4	1.42958e-51	0.148639	0.412	0.339	2.5854e-47
CADPS	1.43119e-51	0.165537	0.246	0.189	2.58831e-47
GGPS1	1.49136e-51	0.460019	0.083	0.054	2.69713e-47
DCAF8	1.92393e-51	0.209021	0.209	0.159	3.47943e-47
MACROD2	2.55417e-51	0.711544	0.042	0.022	4.61921e-47
CLIC4	2.74961e-51	0.21426	0.223	0.171	4.97267e-47
CLIP4	3.02395e-51	0.430796	0.075	0.048	5.46881e-47
SAMD1	3.11585e-51	0.169801	0.205	0.154	5.63502e-47
RAD21	3.34708e-51	0.319028	0.134	0.096	6.05319e-47
NOL4	3.8278e-51	0.25762	0.112	0.077	6.92258e-47
DDRGK1	3.86488e-51	0.264791	0.186	0.14	6.98963e-47
KLHL13	4.37719e-51	-1.14411	0.02	0.04	7.91616e-47
NENF	4.56958e-51	0.293925	0.093	0.061	8.26409e-47
RABGAP1	5.01736e-51	0.247071	0.175	0.13	9.07389e-47
CLNS1A	5.14352e-51	0.227524	0.134	0.095	9.30206e-47
ZC3H13	5.61281e-51	0.182775	0.221	0.169	1.01508e-46
CYFIP2	5.77338e-51	0.177252	0.302	0.24	1.04412e-46
MEIS3	5.93422e-51	0.161017	0.278	0.218	1.0732e-46
GNS	6.14177e-51	0.327897	0.099	0.067	1.11074e-46
PIGZ	6.32923e-51	0.614717	0.046	0.025	1.14464e-46
CASC3	6.857e-51	0.197821	0.273	0.215	1.24009e-46
NEMF	7.15738e-51	0.317475	0.134	0.096	1.29441e-46
BEX4	7.85762e-51	0.15561	0.414	0.342	1.42105e-46
GAD2	8.62856e-51	0.235905	0.175	0.13	1.56048e-46
DOT1L	9.34733e-51	0.187569	0.201	0.152	1.69046e-46
SORBS3	9.57982e-51	0.318397	0.096	0.064	1.73251e-46
JPT1	9.90828e-51	0.155618	0.283	0.223	1.79191e-46
SLC32A1	1.11857e-50	0.189782	0.227	0.174	2.02293e-46
ANKRD28	1.21455e-50	0.233502	0.144	0.103	2.19652e-46
TMEM63C	1.27658e-50	0.371074	0.113	0.078	2.30869e-46
RBM25	1.29035e-50	0.175446	0.258	0.201	2.3336e-46
PPFIA2	1.29162e-50	0.223581	0.171	0.127	2.3359e-46
SEC24C	1.33545e-50	0.226967	0.204	0.155	2.41516e-46
FAM210B	1.52346e-50	0.707393	0.041	0.022	2.75518e-46
STX16	1.70257e-50	0.176867	0.271	0.214	3.07911e-46
RBM5	1.78928e-50	0.161731	0.322	0.258	3.23592e-46
NSA2	1.795e-50	0.250413	0.161	0.119	3.24626e-46
PCSK1N	1.96823e-50	0.137214	0.483	0.405	3.55954e-46
PPP2R5E	2.32525e-50	0.178353	0.224	0.173	4.20521e-46
SECISBP2L	2.56259e-50	0.19127	0.194	0.146	4.63444e-46
ZNF264	2.80578e-50	0.221331	0.186	0.14	5.07426e-46
RNFT2	3.1696e-50	0.229626	0.164	0.121	5.73222e-46
UNC119	3.18555e-50	0.266093	0.146	0.106	5.76107e-46
APIP	3.35394e-50	0.372226	0.09	0.059	6.06559e-46
KIAA0100	3.49447e-50	-0.751426	0.072	0.103	6.31975e-46
HSPA4L	3.92488e-50	-1.2711	0.015	0.034	7.09815e-46
ADM	4.0892e-50	-1.93149	0.004	0.016	7.39531e-46
ELP2	4.36598e-50	0.293841	0.162	0.12	7.89587e-46
IGSF21	4.55379e-50	0.730231	0.039	0.021	8.23552e-46
ZC3H15	4.60271e-50	0.209044	0.192	0.145	8.324e-46
ATF7IP	5.3498e-50	0.178187	0.258	0.202	9.67511e-46
NEO1	5.72547e-50	0.197044	0.221	0.17	1.03545e-45
DDOST	6.14579e-50	0.323056	0.097	0.065	1.11147e-45
SHISA6	6.15103e-50	-2.35819	0.002	0.013	1.11241e-45
MC4R	6.56373e-50	-2.54164	0.003	0.013	1.18705e-45
PPP2R2C	6.56865e-50	0.252719	0.176	0.132	1.18794e-45
KPNA5	8.37307e-50	-0.99356	0.039	0.065	1.51427e-45
FAM32A	8.41019e-50	0.163575	0.221	0.169	1.52098e-45
ZMYM2	9.26966e-50	0.155183	0.353	0.286	1.67642e-45
PSMD3	9.72663e-50	0.189232	0.247	0.193	1.75906e-45
ZBTB22	1.0328e-49	0.442145	0.081	0.053	1.86783e-45
GUCY1A2	1.14512e-49	0.509725	0.042	0.022	2.07095e-45
PPP2R3A	1.53389e-49	0.254138	0.156	0.114	2.77404e-45
LRP1	1.67123e-49	0.194638	0.257	0.202	3.02241e-45
ANK2	1.73603e-49	-0.532287	0.216	0.252	3.13962e-45
IQCG	1.79381e-49	-2.02102	0.006	0.019	3.2441e-45
ZNF460	1.97907e-49	0.248156	0.211	0.163	3.57914e-45
GOLGA5	2.04485e-49	0.380681	0.101	0.069	3.6981e-45
NGFR	2.40977e-49	1.0586	0.023	0.01	4.35808e-45
VAPA	2.43337e-49	0.241289	0.175	0.131	4.40075e-45
GATAD2B	2.49331e-49	0.185065	0.274	0.217	4.50915e-45
UTP3	2.97879e-49	-1.89288	0.006	0.019	5.38715e-45
DONSON	3.24454e-49	0.402779	0.113	0.079	5.86775e-45
PTPRN2	3.25336e-49	0.190032	0.255	0.2	5.8837e-45
ANKRD27	3.75073e-49	0.478429	0.079	0.051	6.78319e-45
TNXB	4.00998e-49	0.60419	0.084	0.056	7.25204e-45
PPP4R3B	4.4031e-49	0.175308	0.224	0.172	7.96301e-45
CAND1	4.76259e-49	0.136518	0.41	0.337	8.61314e-45
NRXN2	5.29447e-49	0.139073	0.337	0.272	9.57506e-45
UCHL3	5.55474e-49	0.277594	0.123	0.087	1.00457e-44
OAZ1	5.71369e-49	0.130286	0.607	0.529	1.03332e-44
PRDM2	6.05118e-49	0.150791	0.219	0.168	1.09436e-44
ANXA5	6.19114e-49	-0.931837	0.02	0.039	1.11967e-44
IQSEC3	6.26822e-49	0.490074	0.066	0.041	1.13361e-44
CSNK1D	6.57756e-49	0.195742	0.232	0.18	1.18955e-44
ZNF451	6.75688e-49	-1.81454	0.006	0.019	1.22198e-44
SNX2	7.46787e-49	-1.16807	0.024	0.045	1.35056e-44
MRNIP	7.71791e-49	0.188035	0.186	0.14	1.39578e-44
AP3B2	7.94339e-49	0.187943	0.208	0.159	1.43656e-44
PPARGC1B	8.68996e-49	0.979983	0.023	0.009	1.57158e-44
GRIP2	8.73496e-49	0.368044	0.086	0.057	1.57972e-44
SYNGR1	9.2513e-49	0.249927	0.163	0.121	1.6731e-44
ZBTB6	1.02292e-48	0.318619	0.115	0.08	1.84995e-44
ALMS1	1.08128e-48	0.227959	0.161	0.119	1.95549e-44
THADA	1.21465e-48	-1.68634	0.008	0.022	2.19669e-44
GNAI2	1.2748e-48	0.267724	0.162	0.12	2.30548e-44
DPH5	1.50474e-48	0.393286	0.073	0.046	2.72133e-44
NNAT	1.5718e-48	-0.177404	0.901	0.88	2.8426e-44
EHMT2	1.63568e-48	0.170008	0.256	0.2	2.95812e-44
FNBP1	1.65984e-48	0.2456	0.155	0.114	3.00182e-44
ARPC5	1.84815e-48	-1.06636	0.029	0.052	3.34237e-44
METAP2	1.89564e-48	0.314361	0.106	0.073	3.42826e-44
ATIC	2.07836e-48	0.395169	0.074	0.047	3.75871e-44
SH3GL3	2.25162e-48	0.346084	0.105	0.073	4.07206e-44
SET	2.37254e-48	0.151224	0.304	0.242	4.29074e-44
SEC61A2	2.42544e-48	0.280509	0.107	0.074	4.3864e-44
FBXO3	2.48457e-48	0.281827	0.11	0.076	4.49334e-44
ATAD3B	2.56785e-48	-1.40133	0.014	0.031	4.64396e-44
PSMB2	2.68647e-48	0.186572	0.224	0.173	4.85848e-44
GRIPAP1	2.72082e-48	0.179417	0.206	0.157	4.92061e-44
DYRK2	2.92786e-48	0.223648	0.15	0.109	5.29503e-44
MON2	3.06465e-48	0.285835	0.126	0.09	5.54241e-44
DPF3	3.10345e-48	0.769364	0.029	0.013	5.61258e-44
DAB2IP	3.12207e-48	0.301325	0.145	0.106	5.64626e-44
RAB3IP	3.1326e-48	0.317428	0.125	0.089	5.66531e-44
CCNC	3.31102e-48	0.238981	0.144	0.104	5.98798e-44
ZNF709	3.3219e-48	0.375947	0.082	0.054	6.00765e-44
SCN9A	3.50758e-48	-0.817403	0.038	0.063	6.34346e-44
TRIM7	3.60472e-48	0.793113	0.049	0.028	6.51914e-44
PLEKHA1	3.65876e-48	0.359098	0.106	0.073	6.61686e-44
MST1	3.81376e-48	0.281488	0.087	0.058	6.89719e-44
SLITRK5	3.99842e-48	0.388829	0.111	0.078	7.23114e-44
STC2	4.10803e-48	-1.35496	0.014	0.031	7.42938e-44
LCMT1	4.64714e-48	0.219613	0.16	0.118	8.40435e-44
PPHLN1	5.52476e-48	-0.921942	0.039	0.064	9.99153e-44
DPF1	5.8665e-48	0.203532	0.188	0.142	1.06096e-43
RUFY3	6.2016e-48	-0.470096	0.281	0.312	1.12156e-43
RHEB	6.33533e-48	0.374712	0.105	0.073	1.14574e-43
INSYN1	6.77609e-48	0.288795	0.108	0.075	1.22546e-43
COG1	7.12012e-48	0.383947	0.109	0.076	1.28767e-43
ARF1	7.69567e-48	0.168864	0.332	0.27	1.39176e-43
AP2A2	7.97314e-48	0.169198	0.229	0.178	1.44194e-43
JUN	8.02198e-48	0.262317	0.161	0.12	1.45078e-43
PGAP1	9.09255e-48	0.159155	0.26	0.205	1.64439e-43
KCNF1	9.43977e-48	0.475813	0.065	0.041	1.70718e-43
RUNDC3A	1.0579e-47	0.18206	0.219	0.169	1.91321e-43
SCAPER	1.13984e-47	0.298403	0.113	0.079	2.0614e-43
LMO7	1.27353e-47	0.830315	0.027	0.012	2.30318e-43
SNCB	1.31043e-47	0.282019	0.095	0.064	2.36991e-43
TTYH1	1.32559e-47	0.198434	0.223	0.173	2.39734e-43
VPS13B	1.33578e-47	-0.944946	0.047	0.073	2.41576e-43
MGAT5	1.34122e-47	0.160809	0.192	0.146	2.42559e-43
PDS5B	1.34137e-47	0.235851	0.187	0.141	2.42586e-43
ICAM5	1.39201e-47	-1.6154	0.008	0.021	2.51746e-43
SLC6A1	1.58962e-47	0.147761	0.245	0.191	2.87482e-43
UBA6	1.70557e-47	0.266111	0.168	0.126	3.08453e-43
EDEM3	1.75405e-47	0.28377	0.174	0.131	3.1722e-43
GPRASP2	1.88782e-47	0.289498	0.12	0.085	3.41412e-43
FOXP2	1.97786e-47	0.297537	0.089	0.06	3.57697e-43
NBEA	2.13262e-47	0.220723	0.169	0.127	3.85685e-43
AGAP2	2.64972e-47	0.123674	0.325	0.261	4.79202e-43
AP2B1	2.65457e-47	0.207548	0.172	0.129	4.8008e-43
RBM26	2.76764e-47	0.261649	0.156	0.116	5.00528e-43
GINM1	2.80368e-47	0.351527	0.096	0.065	5.07045e-43
AKT3	2.86539e-47	0.155132	0.371	0.304	5.18205e-43
CASP9	2.91625e-47	0.504343	0.076	0.049	5.27405e-43
PLEKHM2	3.01748e-47	-1.08394	0.032	0.054	5.45711e-43
ZNF83	3.3418e-47	0.362403	0.091	0.061	6.04364e-43
PNCK	3.9648e-47	-1.3671	0.016	0.034	7.17035e-43
DNM1L	4.18645e-47	0.203902	0.257	0.203	7.57119e-43
AAK1	4.26105e-47	0.206317	0.186	0.141	7.70611e-43
ZNF283	4.42575e-47	0.426581	0.08	0.053	8.00397e-43
IBA57	4.43954e-47	-2.35786	0.002	0.012	8.0289e-43
HYDIN	4.49384e-47	-1.97975	0.004	0.016	8.12712e-43
CAMK2D	4.92501e-47	0.3169	0.102	0.07	8.90688e-43
TSPYL1	4.96152e-47	0.182373	0.218	0.168	8.97292e-43
PAXX	5.0444e-47	0.29904	0.125	0.089	9.12279e-43
GPN3	6.14434e-47	0.504916	0.065	0.04	1.1112e-42
ENTPD4	6.67106e-47	0.190555	0.215	0.166	1.20646e-42
PTPRD	6.75823e-47	0.172594	0.142	0.103	1.22223e-42
PGK1	7.3294e-47	-3.05128	0.001	0.01	1.32552e-42
GOSR1	7.81614e-47	0.357187	0.083	0.055	1.41355e-42
PUM1	8.10863e-47	0.174091	0.272	0.216	1.46645e-42
CEP350	8.19476e-47	0.340458	0.094	0.064	1.48202e-42
HIST1H4J	8.31743e-47	-1.13379	0.021	0.04	1.50421e-42
ZCCHC12	8.65832e-47	0.225122	0.192	0.147	1.56586e-42
SOX1	9.03908e-47	-0.692425	0.072	0.103	1.63472e-42
BLMH	9.49713e-47	0.34801	0.095	0.064	1.71756e-42
MMP16	1.07691e-46	0.318786	0.101	0.07	1.94758e-42
MSANTD4	1.22601e-46	0.277939	0.131	0.094	2.21723e-42
GEMIN6	1.227e-46	0.694353	0.046	0.026	2.21902e-42
C1orf56	1.23103e-46	-3.20375	0.001	0.01	2.22632e-42
FAT4	1.4968e-46	0.340549	0.077	0.05	2.70696e-42
EIF4EBP1	1.5632e-46	0.254655	0.143	0.105	2.82704e-42
AHCYL2	1.56404e-46	0.302722	0.113	0.079	2.82856e-42
HDHD5	1.60948e-46	-1.53644	0.011	0.027	2.91074e-42
MAPK14	1.61547e-46	0.393612	0.099	0.068	2.92158e-42
CAMK2G	1.76358e-46	0.258478	0.125	0.089	3.18943e-42
ARHGAP44	1.85127e-46	0.460211	0.066	0.042	3.34802e-42
PRNP	1.94266e-46	0.160436	0.213	0.164	3.5133e-42
ACADVL	1.97809e-46	-0.882993	0.057	0.084	3.57738e-42
GEMIN4	2.18687e-46	0.546557	0.052	0.03	3.95496e-42
RAB18	2.18795e-46	0.19007	0.201	0.154	3.9569e-42
PDE1B	2.22444e-46	0.528705	0.047	0.027	4.0229e-42
CACNA2D1	2.28385e-46	0.506716	0.062	0.038	4.13033e-42
WNT7A	2.41454e-46	0.310659	0.091	0.061	4.3667e-42
IFRD2	2.45964e-46	-2.73534	0.001	0.01	4.44827e-42
PRPS2	3.09455e-46	1.03264	0.028	0.013	5.59649e-42
NDUFV2	3.56758e-46	0.161045	0.27	0.213	6.45197e-42
SORL1	3.63365e-46	0.609851	0.043	0.024	6.57146e-42
GOLGA1	3.83199e-46	0.409388	0.071	0.046	6.93015e-42
TPST1	4.28077e-46	0.246679	0.178	0.135	7.74178e-42
ACTR1B	4.3616e-46	0.184853	0.175	0.132	7.88795e-42
GPRC5B	4.59102e-46	0.266153	0.114	0.08	8.30286e-42
BTBD8	4.8049e-46	0.277082	0.159	0.119	8.68965e-42
KIAA0408	4.96547e-46	-0.561357	0.183	0.218	8.98006e-42
C15orf61	5.09527e-46	0.324631	0.081	0.053	9.2148e-42
SUMO3	5.45136e-46	0.161598	0.251	0.197	9.85878e-42
OCIAD1	6.08576e-46	0.138067	0.345	0.279	1.10061e-41
STAT3	6.27111e-46	-1.23982	0.019	0.038	1.13413e-41
RNF149	6.53747e-46	0.31984	0.126	0.091	1.1823e-41
BAD	6.66082e-46	-1.22322	0.023	0.042	1.20461e-41
DENND2A	6.70416e-46	0.314498	0.093	0.063	1.21245e-41
SNRPA	7.26427e-46	0.256547	0.122	0.087	1.31374e-41
CASC4	7.39887e-46	0.171182	0.165	0.123	1.33809e-41
ATP6V0A1	8.19133e-46	0.142573	0.317	0.256	1.4814e-41
SF3B3	8.42321e-46	0.177211	0.228	0.178	1.52334e-41
UBE2QL1	9.70659e-46	0.317355	0.12	0.086	1.75544e-41
DGKI	9.88772e-46	0.285617	0.097	0.067	1.78819e-41
LARP4	1.04604e-45	0.252425	0.166	0.124	1.89177e-41
INO80B	1.07248e-45	-1.08448	0.031	0.054	1.93958e-41
ITPRID2	1.07783e-45	-1.45468	0.01	0.024	1.94926e-41
COL18A1	1.2458e-45	0.95327	0.024	0.011	2.25302e-41
ERP44	1.30371e-45	0.32152	0.105	0.073	2.35775e-41
ZKSCAN8	1.32957e-45	0.289199	0.145	0.107	2.40452e-41
KCNK3	1.39565e-45	0.543032	0.052	0.031	2.52403e-41
RCN1	1.41534e-45	0.315095	0.117	0.083	2.55964e-41
EPM2AIP1	1.58329e-45	0.201259	0.221	0.172	2.86338e-41
TMEM245	1.69934e-45	0.205007	0.195	0.15	3.07325e-41
LRRC8B	1.77114e-45	0.302854	0.126	0.09	3.2031e-41
THAP6	1.80977e-45	0.449017	0.074	0.048	3.27298e-41
ADCK2	1.90489e-45	0.428379	0.067	0.042	3.445e-41
TUSC2	1.93696e-45	0.351982	0.085	0.057	3.50299e-41
TDRD3	1.98758e-45	0.4043	0.062	0.038	3.59454e-41
FOXK2	2.0283e-45	0.278294	0.13	0.094	3.66818e-41
GFPT2	2.16215e-45	0.62302	0.041	0.022	3.91025e-41
KIF5A	2.19081e-45	-0.562911	0.18	0.214	3.96208e-41
ATF6B	2.21999e-45	0.167326	0.181	0.137	4.01485e-41
AMOT	2.22331e-45	0.740259	0.038	0.02	4.02085e-41
FXR2	2.70815e-45	-1.29585	0.016	0.033	4.89769e-41
CDC42BPB	2.88864e-45	0.188269	0.225	0.176	5.22411e-41
HNRNPD	3.0151e-45	0.104525	0.367	0.299	5.45281e-41
ANKRD26	3.07578e-45	0.306672	0.128	0.092	5.56256e-41
N4BP2L2	3.44934e-45	0.197345	0.21	0.163	6.23814e-41
NALCN	3.76738e-45	0.263393	0.109	0.076	6.81332e-41
C18orf32	3.97484e-45	0.14565	0.221	0.171	7.18849e-41
ATP9B	4.17269e-45	-1.03701	0.034	0.057	7.5463e-41
CDK13	4.17566e-45	0.315568	0.13	0.094	7.55167e-41
GLS	4.22817e-45	0.389988	0.087	0.059	7.64665e-41
PRRC2C	5.15234e-45	0.181526	0.241	0.19	9.318e-41
SYT3	5.84853e-45	0.233831	0.137	0.1	1.05771e-40
ARHGEF9	5.8615e-45	0.20822	0.212	0.165	1.06005e-40
QARS	6.04075e-45	0.198974	0.165	0.123	1.09247e-40
BRSK1	6.60666e-45	0.120177	0.467	0.391	1.19481e-40
EIF3I	7.76017e-45	-2.76258	0.001	0.01	1.40343e-40
TCERG1	8.33186e-45	0.15876	0.289	0.232	1.50682e-40
OGDHL	8.43161e-45	0.487606	0.05	0.03	1.52486e-40
RNF130	8.8531e-45	0.142593	0.235	0.184	1.60108e-40
QKI	8.87821e-45	-0.686064	0.096	0.127	1.60562e-40
TMEM178B	9.42119e-45	0.155709	0.254	0.2	1.70382e-40
DEK	9.71306e-45	0.284227	0.093	0.064	1.75661e-40
SETD7	9.74664e-45	0.395912	0.069	0.044	1.76268e-40
SCAMP5	1.01041e-44	0.116542	0.283	0.225	1.82733e-40
ZNF880	1.0898e-44	0.570922	0.056	0.034	1.9709e-40
FLYWCH2	1.10865e-44	0.287152	0.109	0.077	2.005e-40
CCDC85C	1.12638e-44	0.2942	0.101	0.07	2.03706e-40
SESN2	1.14927e-44	0.531059	0.068	0.044	2.07845e-40
FAM133A	1.15486e-44	1.24938	0.017	0.006	2.08857e-40
CKAP4	1.2423e-44	0.261716	0.142	0.105	2.24669e-40
SESN1	1.39502e-44	0.382351	0.09	0.062	2.52289e-40
DNAJB2	1.43796e-44	0.217358	0.182	0.138	2.60055e-40
PRMT1	1.49461e-44	0.162965	0.226	0.177	2.703e-40
IAH1	1.55149e-44	-1.70549	0.008	0.021	2.80587e-40
PLCE1	1.61403e-44	-1.51425	0.01	0.025	2.91898e-40
TOMM5	1.66279e-44	0.175483	0.196	0.15	3.00716e-40
REPS1	1.7396e-44	0.184797	0.149	0.11	3.14606e-40
CASK	1.82775e-44	0.173176	0.302	0.245	3.30549e-40
SMAP1	2.04687e-44	0.203592	0.198	0.153	3.70176e-40
UBE2R2	2.12854e-44	0.15322	0.312	0.252	3.84947e-40
EDEM1	2.51002e-44	0.347266	0.084	0.056	4.53937e-40
LCOR	2.67277e-44	0.149426	0.317	0.257	4.83371e-40
SLC4A10	2.79171e-44	0.410758	0.073	0.048	5.04881e-40
KCNK12	2.89302e-44	0.837692	0.031	0.015	5.23203e-40
POU3F4	3.14693e-44	0.226526	0.109	0.076	5.69123e-40
PAK1	3.60634e-44	-1.19446	0.018	0.036	6.52207e-40
IRF2BP2	3.7483e-44	0.324532	0.129	0.094	6.7788e-40
LTBP4	3.91213e-44	0.263392	0.142	0.105	7.07508e-40
MAML1	4.10311e-44	0.241917	0.128	0.093	7.42048e-40
ALAD	4.23491e-44	0.348494	0.081	0.054	7.65884e-40
RAD23A	4.34314e-44	0.292973	0.119	0.086	7.85458e-40
ISCU	4.36279e-44	0.303894	0.122	0.088	7.8901e-40
CTSB	4.42776e-44	0.140638	0.178	0.135	8.00761e-40
TLCD5	4.744e-44	-2.69268	0.002	0.011	8.57952e-40
CHCHD7	5.95721e-44	0.403045	0.059	0.036	1.07736e-39
YY1AP1	6.99222e-44	0.219034	0.139	0.102	1.26454e-39
STK25	7.65439e-44	0.15361	0.229	0.179	1.3843e-39
VARS	7.76643e-44	0.186427	0.183	0.139	1.40456e-39
CCDC14	8.42143e-44	0.169778	0.182	0.138	1.52302e-39
SELENOH	9.80462e-44	0.121024	0.361	0.295	1.77317e-39
STARD4	1.00468e-43	-1.00161	0.019	0.037	1.81697e-39
GALE	1.06232e-43	0.330455	0.071	0.045	1.9212e-39
SLC25A46	1.10368e-43	0.209635	0.144	0.106	1.99601e-39
FEZ1	1.13195e-43	0.123923	0.411	0.342	2.04713e-39
VPS54	1.17175e-43	-1.02456	0.03	0.051	2.11911e-39
PPM1E	1.21801e-43	0.247366	0.104	0.072	2.20276e-39
IVD	1.22728e-43	-1.64757	0.007	0.02	2.21954e-39
PAFAH1B2	1.29063e-43	0.140206	0.316	0.256	2.3341e-39
EPRS	1.47776e-43	0.171223	0.227	0.179	2.67252e-39
GRIP1	1.57993e-43	0.389592	0.07	0.045	2.85731e-39
VOPP1	1.72842e-43	0.289797	0.122	0.088	3.12584e-39
EXOC2	1.73749e-43	0.272049	0.114	0.081	3.14224e-39
ALDH5A1	1.89724e-43	0.314813	0.102	0.071	3.43115e-39
SLC25A6	2.20868e-43	0.202385	0.186	0.142	3.9944e-39
TMEM108	2.66901e-43	-1.97326	0.006	0.018	4.8269e-39
IRAK1	2.93819e-43	-2.16357	0.004	0.015	5.31371e-39
ZNF428	2.99594e-43	0.11702	0.415	0.343	5.41816e-39
COX7B	3.20763e-43	0.271513	0.104	0.073	5.80099e-39
VBP1	3.34903e-43	0.182376	0.212	0.165	6.05672e-39
GLE1	3.41764e-43	0.328889	0.073	0.048	6.1808e-39
HACD2	3.47572e-43	0.475055	0.059	0.037	6.28584e-39
KDM3B	3.56211e-43	-1.02299	0.035	0.058	6.44208e-39
GGA2	3.66059e-43	0.348168	0.094	0.065	6.62017e-39
MDGA1	3.75455e-43	0.542943	0.049	0.029	6.79011e-39
TRHDE	4.18828e-43	0.496132	0.052	0.031	7.57451e-39
NSG2	4.68369e-43	-0.350968	0.412	0.428	8.47045e-39
MAP7	5.41632e-43	0.715321	0.032	0.016	9.79542e-39
ZNF516	6.11293e-43	0.293162	0.098	0.068	1.10552e-38
CCDC32	7.5198e-43	0.286324	0.1	0.069	1.35996e-38
BIVM	7.72677e-43	0.242997	0.112	0.08	1.39739e-38
ELMOD1	8.10006e-43	0.350769	0.1	0.07	1.4649e-38
PTPN5	8.53829e-43	0.209066	0.138	0.101	1.54415e-38
FAM168A	8.70795e-43	0.104754	0.357	0.291	1.57483e-38
PIGT	8.89001e-43	-1.09439	0.019	0.037	1.60776e-38
PLA2G4B	8.9372e-43	-1.35253	0.011	0.026	1.61629e-38
MORN4	8.99845e-43	0.213532	0.171	0.13	1.62737e-38
EPHX1	9.39439e-43	0.365625	0.082	0.055	1.69897e-38
FAM131B	9.9114e-43	0.225042	0.136	0.1	1.79248e-38
YTHDF2	1.02067e-42	0.163914	0.216	0.169	1.84588e-38
ALAS1	1.03638e-42	0.2673	0.128	0.093	1.8743e-38
ARF5	1.14255e-42	0.144775	0.231	0.181	2.0663e-38
POU6F1	1.15277e-42	0.288637	0.089	0.061	2.08478e-38
DACT3	1.17151e-42	0.25196	0.158	0.119	2.11867e-38
ZNF578	1.23299e-42	-3.27016	0.001	0.01	2.22986e-38
MAF1	1.25239e-42	0.210937	0.172	0.131	2.26495e-38
OSBPL8	1.25488e-42	0.176916	0.202	0.156	2.26946e-38
UBXN2B	1.29087e-42	0.182885	0.166	0.125	2.33453e-38
ZNF471	1.32145e-42	-1.87284	0.008	0.021	2.38984e-38
B4GALT2	1.33433e-42	0.17036	0.197	0.152	2.41313e-38
ANO8	1.43034e-42	0.10173	0.296	0.237	2.58677e-38
CARS	1.4375e-42	0.631486	0.05	0.03	2.59973e-38
CUL1	1.47611e-42	0.199107	0.16	0.12	2.66955e-38
CCKBR	1.49708e-42	0.54422	0.041	0.023	2.70746e-38
GTF2A1	1.51063e-42	0.189031	0.154	0.115	2.73198e-38
ZC2HC1A	1.6732e-42	0.143765	0.297	0.24	3.02598e-38
IQCE	2.01775e-42	-1.47196	0.012	0.027	3.6491e-38
JMY	2.0664e-42	-1.52699	0.008	0.022	3.73708e-38
ARL6IP4	2.13836e-42	-0.875391	0.049	0.074	3.86722e-38
GCLC	2.27282e-42	0.452815	0.065	0.042	4.11039e-38
ILVBL	2.29433e-42	-1.02014	0.028	0.048	4.1493e-38
KPNA2	2.43569e-42	-0.996583	0.026	0.046	4.40494e-38
RNF114	2.76707e-42	0.345869	0.1	0.07	5.00425e-38
PSMD6	2.96472e-42	0.19238	0.172	0.131	5.3617e-38
RAP2C	3.05021e-42	0.290489	0.084	0.057	5.51631e-38
ERGIC1	3.08828e-42	-1.60224	0.008	0.021	5.58515e-38
ATP5F1C	3.58383e-42	0.180771	0.167	0.126	6.48135e-38
PTPN4	3.73e-42	0.213964	0.114	0.081	6.74571e-38
TBC1D15	4.01965e-42	0.336279	0.108	0.077	7.26953e-38
ZFYVE27	4.17205e-42	0.190773	0.135	0.099	7.54516e-38
NXPH1	4.37138e-42	0.348015	0.079	0.053	7.90564e-38
RNF150	4.37766e-42	0.324772	0.093	0.064	7.91699e-38
PPIG	4.62408e-42	0.177291	0.171	0.13	8.36264e-38
SERP1	4.71767e-42	0.3104	0.115	0.082	8.53191e-38
PLCB1	5.09427e-42	0.499294	0.056	0.034	9.21299e-38
SIAH1	5.1029e-42	0.197487	0.166	0.125	9.2286e-38
NHS	5.23205e-42	0.836975	0.025	0.011	9.46215e-38
VPS36	5.3004e-42	0.22295	0.122	0.088	9.58578e-38
COX18	5.43335e-42	0.275828	0.115	0.083	9.82621e-38
AP4B1	5.65659e-42	0.175546	0.128	0.093	1.02299e-37
LRRC58	5.89271e-42	0.398257	0.077	0.052	1.0657e-37
PRPF6	6.61036e-42	0.185446	0.245	0.195	1.19548e-37
ATP7A	6.80165e-42	-2.9887	0.001	0.01	1.23008e-37
PXK	7.01034e-42	0.294751	0.114	0.082	1.26782e-37
SOCS2	7.33133e-42	0.284301	0.077	0.051	1.32587e-37
COL26A1	7.36872e-42	0.363963	0.085	0.057	1.33263e-37
ZCCHC17	7.41623e-42	0.181535	0.182	0.14	1.34123e-37
CD99L2	7.57524e-42	0.243859	0.108	0.077	1.36998e-37
CELF3	7.72114e-42	0.135722	0.577	0.501	1.39637e-37
ARL6IP5	8.11019e-42	-0.764645	0.061	0.088	1.46673e-37
RANGRF	8.30837e-42	0.291902	0.077	0.051	1.50257e-37
ST3GAL2	8.59e-42	-1.62771	0.007	0.02	1.5535e-37
TCP11L1	9.24092e-42	0.270137	0.109	0.078	1.67122e-37
MAP1LC3A	9.68026e-42	0.144664	0.252	0.2	1.75068e-37
PTPN1	1.0021e-41	0.246444	0.148	0.111	1.81229e-37
FAM217B	1.05407e-41	0.26441	0.08	0.053	1.90629e-37
TMEM9B	1.09322e-41	0.192883	0.155	0.116	1.97709e-37
RGMA	1.0963e-41	0.279916	0.207	0.164	1.98265e-37
DPH7	1.31017e-41	0.224755	0.124	0.09	2.36944e-37
PPP1R26	1.31321e-41	0.248923	0.113	0.081	2.37494e-37
AGRN	1.31658e-41	0.169818	0.272	0.219	2.38103e-37
UBE2G2	1.31701e-41	0.23373	0.146	0.109	2.3818e-37
MEF2A	1.50702e-41	0.31163	0.089	0.061	2.72544e-37
OLFM2	1.54651e-41	0.158552	0.174	0.133	2.79686e-37
KLHL15	1.56319e-41	0.697283	0.042	0.024	2.82704e-37
CREG2	1.60281e-41	0.767988	0.03	0.015	2.89868e-37
NRBP2	1.60735e-41	0.233723	0.142	0.105	2.90689e-37
KCNIP1	1.69157e-41	0.348029	0.059	0.037	3.0592e-37
MYT1	1.78629e-41	0.164342	0.179	0.137	3.2305e-37
C1orf52	1.85947e-41	0.283785	0.137	0.102	3.36285e-37
DDX17	1.99585e-41	0.158534	0.237	0.187	3.60949e-37
ADCY3	2.0233e-41	0.376548	0.072	0.048	3.65914e-37
MEX3C	2.21864e-41	0.171024	0.194	0.15	4.01241e-37
MYNN	2.22706e-41	0.236729	0.122	0.089	4.02764e-37
STAU2	2.32659e-41	-0.55793	0.178	0.211	4.20764e-37
NKIRAS2	2.4276e-41	-0.772969	0.067	0.093	4.39032e-37
ZMYM4	2.55839e-41	0.1918	0.194	0.15	4.62684e-37
AEBP2	2.61735e-41	0.188109	0.214	0.168	4.73348e-37
FAM192A	2.64332e-41	-2.17833	0.003	0.013	4.78045e-37
ADAMTS13	2.75623e-41	0.25645	0.11	0.078	4.98465e-37
TMEM42	2.83178e-41	0.427443	0.058	0.036	5.12127e-37
POLR1D	2.96532e-41	0.200386	0.154	0.116	5.36278e-37
NIPSNAP1	2.98531e-41	0.146406	0.222	0.174	5.39893e-37
DIAPH2	3.22381e-41	1.13861	0.019	0.007	5.83026e-37
SEMA6B	3.22774e-41	0.150366	0.199	0.154	5.83737e-37
MVB12B	3.48048e-41	0.189132	0.188	0.145	6.29444e-37
ZZEF1	3.5239e-41	0.279835	0.109	0.078	6.37297e-37
PCDHA10	3.59982e-41	-1.74616	0.007	0.019	6.51028e-37
DRAP1	3.65208e-41	0.146622	0.272	0.218	6.60478e-37
HIRIP3	3.69418e-41	-1.08835	0.023	0.042	6.68092e-37
MFSD9	3.76595e-41	0.348244	0.063	0.04	6.81072e-37
WTIP	3.77317e-41	0.326967	0.079	0.053	6.82379e-37
ZIC5	3.97013e-41	-0.949975	0.016	0.032	7.17999e-37
CHAMP1	4.06801e-41	0.19522	0.141	0.105	7.35699e-37
SPON1	4.33707e-41	1.48207	0.016	0.006	7.84359e-37
PHGDH	4.49426e-41	0.211047	0.152	0.114	8.12786e-37
PPP2R3B	4.7821e-41	0.27756	0.122	0.089	8.64843e-37
TPD52	5.24135e-41	0.44958	0.05	0.03	9.47898e-37
ZC3H7A	5.26351e-41	0.33276	0.083	0.057	9.51905e-37
BUD31	5.76781e-41	0.149955	0.218	0.171	1.04311e-36
SLC38A10	5.9507e-41	-0.898791	0.057	0.082	1.07618e-36
PRDX5	6.03225e-41	0.12847	0.22	0.172	1.09093e-36
IGSF8	6.213e-41	-1.10236	0.018	0.034	1.12362e-36
COG3	6.42981e-41	0.191171	0.182	0.14	1.16283e-36
ZC3H6	6.49764e-41	0.195455	0.139	0.103	1.1751e-36
ERO1B	6.78568e-41	0.571283	0.035	0.019	1.22719e-36
GGT7	6.83418e-41	0.285992	0.111	0.08	1.23596e-36
SLC3A2	6.85776e-41	0.141545	0.257	0.205	1.24023e-36
ZC3H18	7.26154e-41	0.341494	0.103	0.073	1.31325e-36
ANAPC4	7.3887e-41	0.41134	0.068	0.045	1.33625e-36
B4GALT5	7.61928e-41	0.200233	0.166	0.126	1.37795e-36
PPP6R2	7.6514e-41	-1.02624	0.032	0.053	1.38376e-36
RAD50	8.1565e-41	0.353228	0.069	0.045	1.4751e-36
VDAC1	8.81678e-41	0.157177	0.174	0.133	1.59451e-36
ATAD1	8.92459e-41	0.163963	0.279	0.226	1.61401e-36
RAB35	9.37817e-41	0.153986	0.183	0.141	1.69604e-36
EMC2	1.01081e-40	0.364997	0.076	0.051	1.82805e-36
ID4	1.04629e-40	-0.255533	0.387	0.421	1.89221e-36
ELAVL4	1.15301e-40	0.132273	0.239	0.19	2.08522e-36
UBE2H	1.16493e-40	0.194274	0.192	0.149	2.10678e-36
SYMPK	1.24763e-40	0.173625	0.178	0.137	2.25635e-36
CBFA2T2	1.29803e-40	0.206835	0.168	0.128	2.34749e-36
ATP2B2	1.52598e-40	0.337622	0.077	0.052	2.75974e-36
LSM4	1.55679e-40	0.153189	0.216	0.169	2.81545e-36
WDR75	1.5936e-40	0.208863	0.132	0.097	2.88202e-36
ABLIM3	1.73572e-40	0.212789	0.125	0.091	3.13905e-36
CORO2B	1.839e-40	0.15923	0.185	0.143	3.32584e-36
SYT6	1.8653e-40	0.241221	0.08	0.054	3.3734e-36
UBE3A	2.10232e-40	0.208268	0.178	0.137	3.80205e-36
PRKAB1	2.13709e-40	0.223615	0.158	0.12	3.86492e-36
MTHFD2	2.17991e-40	0.308563	0.099	0.07	3.94237e-36
ANAPC16	2.22249e-40	0.138362	0.224	0.176	4.01938e-36
CRLS1	2.27798e-40	0.241751	0.098	0.069	4.11973e-36
SEPHS2	2.45678e-40	0.186727	0.105	0.075	4.44309e-36
ACTG1	2.53964e-40	0.119772	0.785	0.733	4.59293e-36
TCTEX1D2	2.63125e-40	0.164944	0.181	0.139	4.75862e-36
OBSCN	2.77762e-40	0.290936	0.091	0.063	5.02333e-36
GPSM1	2.81054e-40	0.133971	0.215	0.169	5.08286e-36
MAP4K5	2.9166e-40	0.153026	0.208	0.162	5.27467e-36
FAM234B	2.93381e-40	0.249306	0.146	0.11	5.30579e-36
CIAO1	3.39932e-40	0.176552	0.19	0.148	6.14768e-36
LMBR1	3.58887e-40	0.170077	0.191	0.148	6.49047e-36
TGOLN2	4.19782e-40	0.267182	0.133	0.099	7.59176e-36
CNPY3	4.24604e-40	0.318186	0.101	0.072	7.67896e-36
BCL7A	4.42951e-40	0.210619	0.139	0.103	8.01077e-36
DCAF4	4.6352e-40	0.5993	0.04	0.023	8.38276e-36
SLC25A12	5.12675e-40	0.160645	0.175	0.134	9.27173e-36
TBKBP1	5.21647e-40	0.281422	0.109	0.078	9.43398e-36
ACADM	5.85573e-40	-0.972426	0.031	0.051	1.05901e-35
MAN2A2	5.9538e-40	0.24379	0.117	0.085	1.07675e-35
CPLX1	6.00007e-40	0.305465	0.065	0.042	1.08511e-35
GPRIN3	6.00796e-40	0.641821	0.042	0.024	1.08654e-35
BDP1	6.32006e-40	0.206865	0.147	0.11	1.14298e-35
PRPF19	7.03745e-40	0.185497	0.196	0.152	1.27272e-35
ZFYVE16	7.09949e-40	0.351581	0.106	0.076	1.28394e-35
TRAPPC12	7.48687e-40	0.197168	0.143	0.107	1.354e-35
ZMYND8	7.52151e-40	0.169649	0.168	0.128	1.36026e-35
GALC	8.3845e-40	0.290906	0.083	0.057	1.51634e-35
STARD10	9.06921e-40	0.326199	0.082	0.056	1.64017e-35
ZNF346	9.25995e-40	0.221861	0.145	0.108	1.67466e-35
WDR36	9.86081e-40	0.358943	0.107	0.077	1.78333e-35
ABHD8	1.02691e-39	0.339333	0.082	0.056	1.85716e-35
PEX2	1.03566e-39	-0.890326	0.037	0.058	1.873e-35
PACS2	1.0758e-39	0.139144	0.188	0.145	1.94559e-35
ADCYAP1R1	1.13594e-39	0.421708	0.07	0.047	2.05434e-35
TMEM63B	1.30371e-39	0.166363	0.164	0.125	2.35776e-35
AAMP	1.32104e-39	0.160928	0.222	0.176	2.38911e-35
REXO4	1.45814e-39	0.334345	0.085	0.059	2.63705e-35
KIDINS220	1.47724e-39	-0.35177	0.382	0.4	2.67159e-35
PRRT1	1.48583e-39	0.505074	0.061	0.039	2.68713e-35
FSTL4	1.59583e-39	1.01641	0.018	0.007	2.88606e-35
GCN1	1.61352e-39	0.287859	0.098	0.069	2.91805e-35
HSPA4	1.79452e-39	0.246602	0.126	0.093	3.2454e-35
ZRANB1	1.8534e-39	0.172923	0.2	0.156	3.35187e-35
ONECUT2	2.07579e-39	-1.04652	0.028	0.047	3.75407e-35
NADK2	2.09099e-39	0.258988	0.118	0.086	3.78155e-35
C8orf33	2.17459e-39	0.171517	0.198	0.154	3.93275e-35
DIS3	2.18554e-39	0.243496	0.161	0.124	3.95255e-35
ELK4	2.19668e-39	0.326284	0.081	0.055	3.97269e-35
PXYLP1	2.23225e-39	0.389088	0.07	0.046	4.03702e-35
NUDT9	2.24009e-39	0.267977	0.079	0.054	4.0512e-35
PPP1R15B	2.40973e-39	0.258009	0.151	0.115	4.35799e-35
VDAC2	2.41082e-39	0.206342	0.167	0.128	4.35997e-35
GTF2I	2.64959e-39	0.213756	0.154	0.117	4.79179e-35
UBASH3B	2.6872e-39	0.509048	0.051	0.031	4.85979e-35
RNF7	2.8134e-39	0.121592	0.294	0.239	5.08803e-35
TADA1	2.84396e-39	0.289268	0.108	0.077	5.1433e-35
CAMK2N1	2.8832e-39	0.174596	0.257	0.208	5.21427e-35
SCN3B	2.9165e-39	0.106017	0.421	0.352	5.27448e-35
DNAJC10	2.92068e-39	0.208365	0.126	0.093	5.28204e-35
NAT9	3.00372e-39	0.243503	0.112	0.081	5.43222e-35
NDUFAB1	3.13106e-39	0.142498	0.266	0.215	5.66252e-35
NEK6	3.2207e-39	-1.03935	0.023	0.041	5.82463e-35
GNG10	3.35793e-39	0.302362	0.082	0.056	6.07282e-35
CNN3	3.44799e-39	0.159974	0.261	0.21	6.23569e-35
TAP2	3.66114e-39	0.74382	0.031	0.016	6.62117e-35
PPP1R10	3.78372e-39	0.162859	0.179	0.138	6.84286e-35
TFEB	3.92165e-39	1.03846	0.016	0.006	7.0923e-35
TBC1D14	4.74151e-39	0.123863	0.198	0.154	8.57501e-35
CEP57	4.80306e-39	0.164237	0.17	0.13	8.68633e-35
ZNF512	4.98132e-39	0.141183	0.21	0.166	9.00872e-35
NEDD4L	5.13091e-39	-0.447227	0.252	0.28	9.27925e-35
MINDY3	5.70296e-39	0.227008	0.117	0.085	1.03138e-34
SPAG9	5.78885e-39	0.140976	0.383	0.32	1.04691e-34
PCDHAC1	5.94084e-39	0.312036	0.124	0.092	1.0744e-34
DOK4	5.96511e-39	0.153657	0.191	0.148	1.07879e-34
CD47	6.23872e-39	0.16624	0.241	0.194	1.12827e-34
EHBP1	6.55925e-39	0.152072	0.219	0.172	1.18624e-34
VPS41	6.96384e-39	-0.796551	0.063	0.089	1.25941e-34
LPIN1	7.33287e-39	0.296401	0.098	0.07	1.32615e-34
GCA	8.17701e-39	0.438604	0.064	0.042	1.47881e-34
CDC40	8.20219e-39	0.470623	0.055	0.035	1.48337e-34
SYNE2	8.46383e-39	-0.565341	0.156	0.187	1.53068e-34
TCF25	8.81573e-39	0.141149	0.263	0.211	1.59433e-34
DNAJA3	9.97656e-39	0.319149	0.096	0.068	1.80426e-34
GON4L	1.01604e-38	0.241741	0.126	0.093	1.83751e-34
DGKD	1.0283e-38	0.209182	0.123	0.09	1.85967e-34
RPRD2	1.03741e-38	0.197577	0.155	0.117	1.87616e-34
HDAC8	1.06527e-38	-1.89235	0.004	0.013	1.92655e-34
STAMBP	1.13097e-38	-0.988291	0.026	0.045	2.04536e-34
NYAP1	1.21323e-38	0.139233	0.196	0.152	2.19413e-34
ZNF770	1.3231e-38	0.624457	0.044	0.026	2.39282e-34
KANSL2	1.32941e-38	-1.2554	0.018	0.034	2.40425e-34
METTL26	1.43082e-38	0.180901	0.154	0.116	2.58763e-34
NGRN	1.50491e-38	0.129489	0.274	0.222	2.72163e-34
SOX2	1.62728e-38	-0.532886	0.118	0.149	2.94294e-34
WSCD2	1.64154e-38	0.920551	0.024	0.011	2.96872e-34
L1CAM	1.7751e-38	-0.472646	0.261	0.288	3.21026e-34
PRKCI	1.87647e-38	0.274101	0.11	0.08	3.3936e-34
SDCCAG8	1.89398e-38	0.300538	0.081	0.056	3.42525e-34
DRAXIN	2.02778e-38	0.21591	0.18	0.14	3.66724e-34
GABRG2	2.04032e-38	0.227767	0.099	0.071	3.68992e-34
AGTPBP1	2.07714e-38	0.137991	0.312	0.256	3.7565e-34
CIAO2B	2.11164e-38	0.26166	0.105	0.075	3.81891e-34
IMPAD1	2.23083e-38	-0.682631	0.077	0.104	4.03446e-34
MEGF8	2.46795e-38	0.135037	0.173	0.133	4.46329e-34
ANAPC5	2.47372e-38	0.143731	0.173	0.133	4.47372e-34
RAB5B	2.72326e-38	0.201162	0.181	0.141	4.92502e-34
ZSCAN18	2.92895e-38	0.163434	0.254	0.205	5.29701e-34
SDF4	3.00659e-38	0.159993	0.158	0.12	5.43741e-34
ANKDD1A	3.15069e-38	0.550219	0.041	0.024	5.69802e-34
TUBGCP6	3.15285e-38	0.199457	0.16	0.123	5.70192e-34
ZFYVE9	3.28202e-38	0.203115	0.147	0.111	5.93554e-34
CERS4	3.43362e-38	0.24416	0.12	0.088	6.20971e-34
PIAS3	3.48231e-38	-1.26179	0.014	0.029	6.29776e-34
SMC5	3.55297e-38	0.388061	0.064	0.042	6.42555e-34
PREP	3.57484e-38	0.2138	0.101	0.072	6.4651e-34
MVD	3.71138e-38	0.212005	0.151	0.115	6.71202e-34
SRP72	3.76261e-38	-0.772017	0.064	0.09	6.80469e-34
MDGA2	4.50129e-38	0.307441	0.079	0.054	8.14058e-34
LGALS3BP	5.01312e-38	-0.877738	0.038	0.059	9.06623e-34
MPPED2	5.13747e-38	0.110705	0.345	0.285	9.29112e-34
CRKL	5.54436e-38	0.157437	0.212	0.167	1.0027e-33
TUBG2	5.601e-38	0.311241	0.09	0.063	1.01294e-33
NOP58	5.79072e-38	-0.830703	0.048	0.071	1.04725e-33
MAN1A2	6.39754e-38	0.217201	0.107	0.077	1.157e-33
GNPDA2	6.40541e-38	0.28752	0.084	0.058	1.15842e-33
HDGFL2	6.44161e-38	-1.15238	0.02	0.037	1.16497e-33
SBF1	6.49761e-38	-0.782291	0.068	0.094	1.17509e-33
DCP1B	6.81836e-38	0.39587	0.084	0.059	1.2331e-33
PKNOX2	6.83862e-38	0.44081	0.062	0.04	1.23676e-33
SLC2A1	7.29907e-38	-0.696852	0.107	0.135	1.32004e-33
ZNF536	7.89238e-38	0.479296	0.032	0.017	1.42734e-33
KATNAL1	7.92908e-38	-0.844099	0.047	0.07	1.43397e-33
CLPP	8.20138e-38	0.150868	0.169	0.13	1.48322e-33
PTDSS1	9.25629e-38	0.165767	0.138	0.104	1.674e-33
CLCN4	9.36784e-38	0.182743	0.142	0.107	1.69417e-33
NECAB2	9.70556e-38	0.443993	0.063	0.041	1.75525e-33
CTNNA2	1.02726e-37	0.136184	0.217	0.172	1.85779e-33
SCRT2	1.0444e-37	0.127095	0.128	0.094	1.88879e-33
ELAVL3	1.04987e-37	0.116926	0.547	0.472	1.8987e-33
KYAT1	1.06887e-37	-1.88614	0.006	0.016	1.93305e-33
FBXO21	1.08397e-37	0.289455	0.107	0.077	1.96036e-33
TMEM259	1.09002e-37	0.125504	0.334	0.276	1.9713e-33
CEP97	1.12352e-37	0.272097	0.106	0.076	2.03189e-33
ZER1	1.26047e-37	0.196466	0.146	0.11	2.27956e-33
SIRT3	1.28265e-37	0.247992	0.092	0.065	2.31968e-33
CCNT1	1.29744e-37	0.297732	0.108	0.079	2.34641e-33
ZBTB10	1.32862e-37	0.295683	0.11	0.081	2.40281e-33
SHOC2	1.34674e-37	0.168345	0.235	0.188	2.43557e-33
PCID2	1.4289e-37	0.302188	0.105	0.076	2.58417e-33
PLEKHA5	1.44267e-37	0.180152	0.155	0.118	2.60908e-33
JMJD6	1.49307e-37	-1.0112	0.021	0.039	2.70022e-33
AKT2	1.67581e-37	0.176601	0.131	0.097	3.0307e-33
ZNF883	1.72314e-37	0.413848	0.056	0.036	3.11629e-33
PARN	1.75112e-37	0.297264	0.087	0.061	3.1669e-33
RASGEF1B	1.90339e-37	-0.757392	0.041	0.063	3.44228e-33
FMNL2	2.01556e-37	0.25283	0.126	0.093	3.64514e-33
BCLAF3	2.01599e-37	0.169992	0.126	0.094	3.64592e-33
SGTA	2.05428e-37	0.150519	0.207	0.164	3.71517e-33
STK32A	2.0903e-37	0.617696	0.046	0.028	3.78031e-33
GLCE	2.09693e-37	0.256383	0.094	0.066	3.7923e-33
DUSP8	2.18212e-37	0.227955	0.106	0.077	3.94637e-33
NUFIP2	2.1879e-37	0.235229	0.159	0.123	3.95681e-33
TSTD2	2.21681e-37	0.255437	0.137	0.103	4.0091e-33
TRAF6	2.22783e-37	0.451584	0.061	0.039	4.02903e-33
TNR	2.32224e-37	0.439811	0.065	0.043	4.19977e-33
SMNDC1	2.47843e-37	0.242309	0.134	0.101	4.48223e-33
CLDND1	2.48302e-37	0.202438	0.169	0.131	4.49055e-33
GMPR2	2.49452e-37	0.314516	0.079	0.055	4.51134e-33
ELP1	2.5331e-37	0.240177	0.137	0.103	4.58112e-33
RCC1L	2.57605e-37	0.27517	0.08	0.055	4.65879e-33
ATP2B3	2.72923e-37	0.345897	0.053	0.033	4.93581e-33
KLF13	2.82573e-37	-1.34005	0.011	0.024	5.11034e-33
RO60	2.89894e-37	0.13984	0.262	0.212	5.24274e-33
C9orf72	3.00588e-37	0.239459	0.141	0.107	5.43614e-33
ZNF354C	3.01616e-37	0.220511	0.078	0.053	5.45473e-33
PFDN2	3.10578e-37	-0.579762	0.166	0.195	5.6168e-33
RNF115	3.24303e-37	-0.872781	0.048	0.07	5.86502e-33
MAGEL2	3.37074e-37	-0.823412	0.046	0.069	6.09598e-33
EXOC6B	3.55112e-37	0.125303	0.227	0.18	6.42221e-33
PFKFB3	3.82783e-37	-0.670374	0.105	0.133	6.92263e-33
PAF1	4.11916e-37	-1.15306	0.021	0.038	7.44951e-33
CCDC115	4.24887e-37	0.237215	0.114	0.084	7.68408e-33
ZNF573	4.33234e-37	0.378252	0.061	0.04	7.83503e-33
BLOC1S6	4.35749e-37	0.358048	0.075	0.051	7.88052e-33
BCKDHA	4.37359e-37	0.305732	0.079	0.054	7.90964e-33
MALSU1	4.51212e-37	0.264283	0.116	0.085	8.16017e-33
MICU2	4.52698e-37	0.134034	0.21	0.166	8.18705e-33
RAB21	4.64546e-37	0.278249	0.116	0.086	8.40131e-33
DNM3	4.65399e-37	0.127796	0.238	0.191	8.41674e-33
CNOT6	4.72286e-37	0.214222	0.154	0.118	8.5413e-33
ENDOG	5.18881e-37	0.242951	0.097	0.069	9.38397e-33
WDR13	5.19895e-37	0.140359	0.189	0.147	9.4023e-33
COX4I1	5.2212e-37	0.122976	0.17	0.13	9.44255e-33
ZNF555	5.23544e-37	0.376478	0.07	0.047	9.46828e-33
DIP2C	5.38664e-37	0.125977	0.225	0.178	9.74174e-33
EP300	5.96171e-37	0.180874	0.182	0.142	1.07818e-32
ADAM10	6.13688e-37	-1.04217	0.025	0.043	1.10985e-32
GPR6	6.14451e-37	-2.26002	0.002	0.01	1.11123e-32
CTSF	6.73877e-37	0.387407	0.033	0.018	1.21871e-32
GANAB	7.73574e-37	0.321103	0.07	0.047	1.39901e-32
TPD52L1	8.22275e-37	0.923786	0.026	0.013	1.48708e-32
FAM219A	9.16275e-37	0.183358	0.209	0.166	1.65708e-32
DDX5	9.38044e-37	0.1181	0.376	0.314	1.69645e-32
R3HCC1L	1.01326e-36	-2.54839	0.002	0.01	1.83248e-32
RBFOX3	1.06306e-36	0.50807	0.044	0.026	1.92255e-32
CSNK2B	1.08144e-36	0.199932	0.116	0.085	1.95579e-32
TNRC6B	1.09637e-36	0.170152	0.205	0.163	1.98278e-32
SNX14	1.17805e-36	0.157749	0.201	0.158	2.13051e-32
DIPK1B	1.21131e-36	0.138755	0.216	0.171	2.19065e-32
ZNF316	1.28766e-36	0.170479	0.204	0.161	2.32873e-32
CDH2	1.35027e-36	-0.411434	0.285	0.311	2.44197e-32
STAM2	1.39893e-36	-0.826951	0.05	0.073	2.52996e-32
MPP6	1.46425e-36	0.153277	0.14	0.106	2.6481e-32
CTNND2	1.48137e-36	0.113462	0.28	0.228	2.67906e-32
FAM200B	1.50149e-36	0.196686	0.12	0.089	2.71544e-32
ZNF382	1.5081e-36	0.291731	0.099	0.071	2.72739e-32
IDH1	1.54289e-36	-0.842294	0.051	0.074	2.79032e-32
RTCA	1.70091e-36	0.219643	0.136	0.103	3.0761e-32
ZUP1	1.73805e-36	0.335657	0.086	0.061	3.14325e-32
OTUD1	1.75626e-36	0.558814	0.04	0.023	3.17619e-32
TBC1D8	1.90122e-36	0.653701	0.025	0.012	3.43835e-32
SAMD12	2.03219e-36	-2.39424	0.002	0.011	3.67521e-32
POMGNT2	2.10446e-36	-1.38326	0.007	0.019	3.80592e-32
XPO1	2.34023e-36	0.183845	0.148	0.113	4.2323e-32
TET2	2.58593e-36	0.128724	0.186	0.146	4.67665e-32
LMAN2	2.63228e-36	0.19768	0.149	0.114	4.76048e-32
NUP210	2.68298e-36	0.328593	0.07	0.047	4.85218e-32
EIF2A	2.69869e-36	0.195719	0.143	0.108	4.88058e-32
MORC2	2.70854e-36	0.150471	0.189	0.148	4.8984e-32
PCDH9	2.74266e-36	-0.743366	0.036	0.057	4.96011e-32
CPNE5	2.74634e-36	0.29234	0.074	0.05	4.96675e-32
PUDP	2.81256e-36	0.77854	0.022	0.01	5.08652e-32
RAE1	2.83417e-36	0.193684	0.141	0.107	5.1256e-32
MXI1	2.9084e-36	0.167905	0.162	0.124	5.25983e-32
ABHD10	2.95098e-36	0.218349	0.105	0.076	5.33685e-32
CPSF6	3.05536e-36	0.144826	0.277	0.227	5.52561e-32
MTX2	3.05887e-36	0.167401	0.146	0.111	5.53196e-32
TMEM50A	3.15618e-36	0.150626	0.226	0.18	5.70796e-32
SPATA18	3.15946e-36	1.48857	0.01	0.003	5.71388e-32
DNAJC21	3.41295e-36	0.427362	0.08	0.055	6.17233e-32
MTURN	3.4174e-36	0.115097	0.297	0.244	6.18038e-32
TAF10	3.43585e-36	0.132037	0.208	0.164	6.21373e-32
TTC37	3.54614e-36	0.183443	0.185	0.145	6.4132e-32
NIPA1	3.55712e-36	0.224943	0.092	0.065	6.43304e-32
CIB1	3.60885e-36	0.441505	0.048	0.03	6.5266e-32
ATP5MD	3.68932e-36	0.220929	0.08	0.055	6.67214e-32
THSD7A	3.75094e-36	0.245861	0.066	0.044	6.78357e-32
DCXR	3.75605e-36	0.255156	0.116	0.085	6.79281e-32
HSF1	3.76375e-36	-0.844489	0.036	0.056	6.80673e-32
SSX2IP	3.78219e-36	-1.71323	0.005	0.016	6.84009e-32
PARP11	3.82748e-36	0.391747	0.07	0.047	6.922e-32
YTHDC2	3.97779e-36	0.17017	0.168	0.13	7.19384e-32
PLXNA3	4.36724e-36	-0.773061	0.058	0.082	7.89815e-32
ZNF638	4.68731e-36	0.122207	0.29	0.237	8.47701e-32
FARSB	4.9321e-36	0.152482	0.243	0.195	8.9197e-32
DDX1	4.93567e-36	0.100665	0.228	0.182	8.92616e-32
HDGFL3	5.13627e-36	0.107826	0.384	0.32	9.28894e-32
SULT4A1	5.13998e-36	0.289903	0.099	0.072	9.29565e-32
PIK3R2	5.39886e-36	0.126177	0.186	0.145	9.76384e-32
TRIP11	5.71512e-36	0.282164	0.081	0.056	1.03358e-31
SEMA6D	5.95491e-36	-0.684617	0.087	0.113	1.07695e-31
UVSSA	6.06628e-36	0.15188	0.157	0.121	1.09709e-31
NDUFC1	6.45959e-36	0.128624	0.154	0.118	1.16822e-31
USP15	7.58379e-36	0.190778	0.133	0.1	1.37153e-31
RAB40C	7.59072e-36	0.286202	0.09	0.064	1.37278e-31
AP3D1	7.61778e-36	0.125012	0.26	0.21	1.37767e-31
PTPN12	7.94609e-36	0.137421	0.167	0.129	1.43705e-31
HECTD1	7.94631e-36	-0.792526	0.053	0.076	1.43709e-31
SIRT2	8.0829e-36	0.178822	0.137	0.104	1.46179e-31
PPP1R12B	8.48272e-36	0.197543	0.131	0.098	1.5341e-31
LYPLAL1	9.09301e-36	0.31648	0.103	0.075	1.64447e-31
PCDHB7	9.37873e-36	0.862711	0.025	0.013	1.69614e-31
RBBP6	9.46979e-36	0.232549	0.098	0.071	1.71261e-31
RAB3GAP2	1.00527e-35	0.23385	0.126	0.095	1.81803e-31
CYC1	1.01275e-35	0.144568	0.178	0.139	1.83155e-31
XBP1	1.03671e-35	0.376974	0.084	0.059	1.8749e-31
RNF208	1.0975e-35	0.220944	0.123	0.092	1.98483e-31
PRKRA	1.1664e-35	0.212223	0.145	0.111	2.10943e-31
NIT1	1.28466e-35	0.262743	0.088	0.062	2.32331e-31
C2orf49	1.42741e-35	0.274861	0.094	0.067	2.58148e-31
[truncated: 5,677 more rows]

## Sheet: IP-InhibN-MGE
Gene	p_val	avg_log2FC	pct.1	pct.2	p_val_adj
[truncated: 4,343 more rows]

[truncated: 6 more sheets: StressN, NPC, Unk, ExN, IP, IP-ExN]
