# Supplementary material for: Human forebrain assembloids modeling a neurodevelopmental disorder reveals neural circuit deficits via DNA damage
Source: Research Square preprint supplement (doi:10.21203/rs.3.rs-7957934/v1), 2025-11-14
Supplement: Supplementary file 5 [file fee47820f355e41dcbd7935d.xlsx]

## Sheet: CGE-InhibN
Gene

## Sheet: OPC
Gene

## Sheet: CGE-NPC
Gene

## Sheet: RG-G2M
Gene

## Sheet: InhibN
Gene

## Sheet: oRG
Gene

## Sheet: MGE-InhibN
Gene

## Sheet: MGE-NPC
Gene

## Sheet: GE-NPC
Gene

## Sheet: ExN
Gene

[truncated: 11 more sheets: NPC, ExM, vRG, Unk, RG, CGE-InhibN-2, IP-ExN, ChN, ExN-Mid, CR, CP]
